# Supplementary material for: Identification of Potential Prognostic Biomarkers for Breast Cancer Based on lncRNA-TF-Associated ceRNA Network and Functional Module
Source: Biomed Res Int. 2020 Jul 28;2020:5257896. doi: 10.1155/2020/5257896 (PMC7411464; doi:10.1155/2020/5257896)
Supplement: Supplementary 1 — Supplementary Table S1: raw data for processed mRNA expression from TCGA. [file 5257896.f1.csv]

Tags	TCGA.BH.A18M.01	TCGA.AC.A8OQ.01	TCGA.BH.A0BG.01	TCGA.A2.A0SY.01	TCGA.A7.A13E.01	TCGA.E2.A15O.01	TCGA.BH.A18I.01	TCGA.AR.A1AO.01	TCGA.BH.A0HB.01	TCGA.A8.A08L.01	TCGA.D8.A1XS.01	TCGA.D8.A27T.01	TCGA.A2.A3XZ.01	TCGA.E2.A1B5.01	TCGA.A8.A08R.01	TCGA.AR.A0TX.01	TCGA.LD.A74U.01	TCGA.E9.A22D.01	TCGA.E2.A9RU.01	TCGA.D8.A1JS.01	TCGA.A2.A25C.01	TCGA.E2.A1IN.01	TCGA.D8.A1XU.01	TCGA.AN.A0XS.01	TCGA.A2.A3XW.01	TCGA.AR.A24R.01	TCGA.E9.A3Q9.01	TCGA.BH.A8G0.01	TCGA.EW.A1P1.01	TCGA.AR.A0TV.01	TCGA.BH.A0B1.01	TCGA.E9.A1ND.01	TCGA.LL.A440.01	TCGA.BH.A208.01	TCGA.AO.A03N.01	TCGA.AC.A2BM.01	TCGA.JL.A3YX.01	TCGA.HN.A2OB.01	TCGA.C8.A12V.01	TCGA.EW.A2FV.01	TCGA.B6.A0RL.01	TCGA.BH.A1ET.11	TCGA.AC.A6IX.01	TCGA.D8.A1X7.01	TCGA.AO.A03U.01	TCGA.BH.A0BC.11	TCGA.BH.A0B8.11	TCGA.A2.A4S2.01	TCGA.BH.A0AY.11
HES4	93922.7598075	110955.168272	130733.921316	121237.520522	300823.246354	83784.3345939	116169.245901	66436.9654125	145021.849653	160104.530594	13116.1284966	71224.3726182	444001.341332	51339.4840887	50880.04303	141568.319584	277554.975879	136091.970621	486040.497314	174225.902777	29782.4898553	79170.6293345	58028.3352105	112471.22547	1006665.05176	28910.6321639	48417.7586145	211017.163016	64452.6486329	147545.876909	52680.7893648	90010.8913178	169384.880268	47312.6805325	322729.332776	105919.062109	371770.299935	103409.837614	173318.590692	171329.900032	252361.594896	31194.1795643	57128.1670428	28227.8775881	60507.8499481	71490.6121322	52485.2423848	225317.102022	73545.9624525
SKI	393634.986035	757044.270088	511061.31282	460026.221796	548645.926133	200907.728181	342948.948086	397328.228127	311394.507305	516055.518891	215375.027495	356056.738218	462704.62373	340855.127274	425539.352366	541877.152963	583834.168206	239460.756911	172446.607136	153605.1082	208753.674987	477083.211636	284385.764354	464622.930162	589234.239558	239785.563995	279946.661526	514247.522996	585505.852501	263120.386485	268197.681192	388404.891729	541524.000189	691494.468044	314608.272948	257680.848753	302531.251067	610880.866253	463452.881605	419066.316788	258198.862502	534142.832967	392831.31706	289799.672459	939582.165431	592543.456713	1002656.88259	258947.903023	600383.220303
PRDM16	3236.87958796	8912.78207702	1034.27943856	1912.87289664	634.317149037	820.812699614	1480.61008399	2139.8916293	1470.90628788	15277.5981305	2101.9109576	3005.49837792	1565.99137945	5654.07943556	1248.01930935	2910.41667411	11888.2017354	3615.84776596	4963.17921408	382.785621496	1592.41543741	1647.71472763	3365.05920909	2081.04365256	3758.36958169	783.785305065	1500.15507853	5175.96838302	12207.716094	972.877082001	3231.88062631	1954.98212466	7153.86988801	2941.30952983	58.9184774046	698.062652942	1029.83553128	2423.32743455	3626.53386783	3258.64038775	231.361177877	11193.2792917	6349.19886607	1751.47142851	37794.1744742	12745.2886053	26303.1998625	2287.94601363	13425.4384876
TP73	20145.4804199	17537.6580984	2007.1423226	26162.8389995	916.069140122	34626.2332086	21180.9744822	11077.8669448	8648.7555996	107907.816688	17172.4895373	13221.0187007	16190.8274568	11830.3558476	2772.87152822	10948.9987595	25962.4575386	19709.8815373	24046.5847087	12825.2370592	16972.7071419	9026.06613021	5831.70781521	17115.5262235	145799.090095	38024.4061349	5295.87990774	14736.5038364	9198.34365426	41869.3325011	28915.2513194	12285.38421	10041.8192286	3371.25796266	6636.94040621	17456.5533778	13769.2369914	18238.9505779	25016.1599926	53666.4498673	64438.8847476	18908.0792687	8345.7975807	21107.763791	1586.95547605	19832.8457872	1020.75307662	10213.0111208	15741.3783679
CHD5	570.825562178	2860.62905233	95.7577787834	74.0816811652	671.173146899	810.604412248	331.063251014	747.775368279	103.758065244	16387.1552596	444.807835972	375.279487266	1124.73850928	1890.5646644	284.422600789	1206.46287971	1677.1929272	5235.49807307	553.389868696	529.23498799	287.942836702	140.277794923	288.974662991	313.499306252	2013.7553309	745.369463876	823.054412539	535.500520166	681.419932372	422.742143818	311.384034893	9548.98151372	990.406346392	553.28172137	174.557159396	253.982467772	1181.06438835	874.434436517	421.344867509	4399.07232717	1175.05946086	1450.5341592	225.27790846	0	131.538804235	882.46782592	498.581038365	102.704148888	175.029292793
HES2	8074.39637448	12276.0303665	1868.2832026	19106.0039889	7529.58538809	10378.7947956	5298.57334651	115427.363719	13095.1620683	5159.91982992	5586.73815757	9797.19418031	6686.1304854	1608.39605257	110059.734285	185172.606929	10924.2578739	34867.5685548	13303.3468184	1382.89889593	17420.928734	7081.70667899	4757.09908504	5797.96232525	231836.3237	3565.71873957	225.818609395	37487.7374583	18120.6264214	6256.23118869	4200.47388109	21188.4339688	7789.7190111	92177.5499848	14154.9380898	995.489949376	155421.379765	26853.707651	4624.1177063	49358.3862065	1492.57881603	1738.29501895	11262.9232601	5509.36131856	6917.22114836	5691.9359455	729.56781497	4038.93040481	3601.66389669
PHF13	260725.079513	224663.367071	205823.294141	256563.115634	276263.692252	243008.630245	273814.911053	228600.679076	337455.98332	320207.385379	245393.107907	205966.072658	132114.283955	190068.26008	185865.091407	226808.832617	249271.536084	181134.250994	252973.715585	312723.61319	121877.448298	325787.30928	129427.284654	262610.57797	286331.999301	340217.087309	276861.99922	193187.125863	331237.327743	301815.924089	317705.401496	203004.188609	284903.75329	248623.927879	159145.610065	341488.67861	270343.12157	217381.707812	224260.433721	506246.586708	440943.643075	227115.69186	160194.767785	282442.18018	139863.788309	246832.328846	358335.650794	207094.783046	277572.992747
PER3	102653.263902	29625.2267741	187327.470099	98289.1213404	77315.1576599	55640.5619697	192737.654607	42560.135049	33766.3385841	60574.837793	142057.566611	98402.6801607	16953.664123	73930.205564	46695.1588177	134023.161915	136222.609724	47867.5435563	38615.1786034	40207.1749704	69593.3280203	89828.9878075	61506.6460525	52277.0232625	61862.5867768	150848.027421	231918.36996	177569.072853	25731.3413691	25576.685026	83368.2790519	59067.7719689	104494.16735	253024.769233	18757.943816	85113.4032531	51239.6920683	42937.020327	73319.157353	135054.014981	109969.926772	263954.683718	61850.6399203	58340.1261767	146652.530011	103110.774946	325483.970188	126293.893164	178415.28514
RERE	325290.278712	258531.222919	199870.312077	334710.026031	271102.021929	191914.712398	341829.090436	249704.187332	317270.614528	579922.315482	228645.122698	263463.443586	163547.739701	253042.786108	176095.714556	450609.884614	353151.702652	167358.03618	165915.177174	272754.019386	201271.366991	309647.543569	225098.776996	352736.820918	230375.109222	255797.966044	365815.631399	430609.234634	279819.716605	341655.621509	284988.397624	159219.821975	456645.717652	309283.103411	241778.889304	304030.586613	210254.662004	383149.934052	240143.534758	238584.186759	277913.275974	489328.091271	219481.322282	250686.384423	459217.654643	401644.738799	524003.600124	319037.050286	439343.68607
ENO1	4994386.86563	10118485.6664	11316359.4588	3818554.38696	11781410.3066	1270193.5726	3627309.11956	7289725.39641	5755144.25324	6990009.52002	3287099.04025	3936482.7952	4407098.37934	4382135.91883	7790978.58346	3571985.5819	3867553.78731	4253235.71425	14908888.9161	6645816.21372	1410539.02781	3745767.85437	2438435.81383	2984833.12574	6511601.33664	3694734.60562	2818462.39401	3707926.9742	5119854.89946	4356557.22986	3553138.96675	12927377.2495	3237899.66883	6175536.24503	2713864.58985	2207080.32711	8587819.73866	2849100.81113	8958950.7413	6234673.50313	4687586.21159	2373049.59557	1658708.68028	3408075.01029	8888926.86979	5422461.80207	4238662.76375	2894536.87282	4093069.18796
CTNNBIP1	268606.222264	191947.89967	338750.1448	263312.785885	610445.813309	182600.970755	190644.526406	452510.474958	382162.022868	838949.960616	200260.773783	228881.251935	174692.160374	267878.121706	332954.839408	588366.33277	379248.066797	196028.938802	323141.043338	1079387.58527	163686.68335	314781.187187	299662.052076	378445.437864	1785308.23481	189782.275151	273527.676942	293002.137099	290485.956145	263178.59411	308742.77274	272018.538682	280349.460932	529332.692562	351581.853361	201398.001974	341664.465671	339432.068806	277432.313395	303622.829437	252721.853762	302972.4561	202292.567544	312343.223863	203085.92719	372403.203025	386473.17312	184044.665967	398025.077589
CASZ1	99735.2169434	42859.402729	32303.3269029	112556.547304	101575.053542	65695.6367675	88142.329403	40504.9388795	88214.5377558	128395.015298	50681.803494	70750.2172064	42593.2016834	35021.1427203	30025.2013177	171630.600919	172735.253459	55819.2361848	67798.9762424	114936.971335	54899.7813284	104467.160694	123031.42162	96153.9221288	100004.609238	74258.2825622	76330.527989	125972.228687	43444.1735967	103034.311868	85913.8795197	65372.7654328	80790.7202367	45012.3427947	52134.2714862	69989.1784258	98976.596872	103351.943643	14556.915075	82322.406794	99299.1988232	77566.8270398	75701.372727	90282.9806851	52473.9863584	77800.6028898	17790.8017466	131268.966798	59630.4697499
TARDBP	208578.526078981	200463.955273661	246218.549259847	241909.513864	200853.6773305	190571.903363	240593.328557873	194105.901388497	289058.801106856	221607.522269057	243145.37609332	200676.267873898	183369.74268108	245599.0172745	232275.282058244	191590.056588382	202053.027973547	267403.668379545	270579.7399525	231388.250469724	232661.2269595	257656.759058	243216.0653565	221995.107784677	164291.680663854	253299.442467316	217897.283983447	182531.897024173	217083.271146479	253376.344698123	211559.992436	240647.797349	178304.3561944	204939.2269005	270334.822047	239621.345078	235558.8653455	179515.592869655	234026.640991058	295142.734519882	264783.226691308	219062.5926883	210423.302468064	211520.341348694	167255.700996936	192089.20621733	196059.047815127	182400.310059506	188455.96607392
PRDM2	158291.46655	90005.8446518	129474.779704	150953.853707	130209.761586	72081.0923878	177879.161323	138325.778255	107191.874912	126476.673276	139160.742451	173014.328705	91176.0074776	164051.442448	116086.297415	176449.297486	163043.527075	93275.9218454	60269.7809967	121781.35836	132842.673784	164886.421681	167453.449315	181507.159602	85230.9120899	148447.436824	59952.7286335	146427.011226	150779.762024	161630.358642	183047.017965	82159.9001504	161951.702747	186272.610341	87980.6650108	127695.207211	88906.2206016	142221.186573	155994.460537	131761.342197	97822.7110097	234298.103952	121092.049029	68800.8401047	162034.238933	173637.89816	138724.342768	125166.297514	165924.981405
SPEN	222891.251435	159570.297121	226680.862281	174404.04225	216569.846863	122767.22661	254502.487659	201841.412875	168506.329176	240827.997451	154161.058575	205380.228486	110450.099977	129297.614505	261342.926001	207068.124172	207702.84172	143852.404956	88984.1608194	113982.383183	153014.371586	159773.496075	146552.65041	192696.609334	160974.729009	212826.590924	211888.808248	176700.853459	201137.679639	285563.049537	180688.936511	127986.902091	192331.315017	181726.242895	107005.350722	217966.046396	110611.833787	197966.796771	230014.93326	235368.400582	194334.889085	341559.170168	110723.96209	238744.408082	200412.340072	246362.967355	249256.015304	160338.412232	238418.361756
ZBTB17	106074.378111	172973.083951	136398.223249	129599.261803	152275.151492	78914.8953109	120659.476434	150761.390524	163242.882175	230673.685456	69169.0172604	126449.312845	157410.337596	118450.118655	104526.945543	129284.515324	233964.554179	136086.032926	222387.773467	196985.43507	54454.5247887	117793.646472	75628.0770247	141050.370257	236700.995986	76164.4671028	129875.365724	171464.648759	110282.969962	131594.988633	94239.7539235	128650.472368	168180.341073	90231.3536209	87404.2828099	101558.757666	166288.124594	189473.63901	172875.712289	127333.354452	149910.997483	92111.2194849	127426.801841	102394.871353	94270.5880368	108336.727884	75592.6463474	171167.243213	114620.140892
PAX7	298.086742169	0	0	232.113995477	0	0	0	1629.87312966	2275.67586151	44342.9912997	46.4559849809	0	275.316407037	137.756969052	49.508765366	13786.2842981	63252.3725928	0	4210.87726568	0	34.6995169307	2593.17269493	45.2710188021	54.5700783011	185.574493553	0	0	228.796285203	2217.15342628	60.2064974491	60.9771128047	81.7459913758	4913.33377028	0	0	0	1696.07680987	0	0	0	409.079608848	0	79878.0818132	0	0	218.286579865	78.1081335249	160.89720141	0
ZBTB40	175709.232444	122706.09784	69020.216253	96838.9359499	95473.9820603	96851.2095139	121132.381429	112711.835315	50612.2311104	113720.032575	93149.2509313	123151.785138	143615.196939	87285.1334993	119360.843192	107951.135836	137406.789245	79051.7989201	55300.6547041	120117.987546	88358.9355806	79642.8740703	113530.149438	115357.231194	95325.9286873	101624.529431	101342.739243	151956.610016	79040.3635096	150858.366777	61646.5590432	71452.1510484	121277.048776	82811.6150872	29630.3918994	103717.483631	80033.6473289	126800.619415	130546.294302	76082.9101742	91186.6062815	157723.951507	97912.6719728	135925.112086	58087.0649149	110392.619704	113458.292096	171813.464573	107034.928423
ZNF436	263677.826657	117064.164541	152521.879558	259569.931326	185494.510632	169564.148087	271857.302251	334428.572265	296611.872325	444667.134888	215683.862747	245529.043643	84370.9135312	215731.851744	175061.506366	421973.496772	244843.231245	159126.766476	101292.989884	209661.594439	207237.294932	291557.751052	221765.156946	241276.134261	162890.575055	200702.568735	171900.217438	201596.459795	355635.06295	177839.671176	177223.564108	274011.297443	226813.20093	446548.340182	220120.075501	268558.784634	127879.84525	255668.227828	202567.397067	178173.695685	124142.63305	361663.123247	194205.8511	256798.098405	214524.230871	514674.44462	491524.845245	181432.421106	217660.901067
E2F2	32139.5956439	46959.2818161	32684.6316153	25912.5692794	309939.075928	38660.5211902	37800.1795509	77307.1196204	52934.9615488	84214.9768236	43961.9362186	22197.2374487	35162.7637034	26534.4232447	119074.405266	66239.1284628	26763.857279	66906.5180184	57167.3942973	8152.85674645	23764.4064187	21050.4607	9217.53449492	13067.9287508	47015.843749	34758.9544444	4997.07298315	9087.54918415	19664.5568592	98764.6272468	36893.5445062	66765.6377406	16872.6619752	37017.8456934	34588.5688418	55959.985914	40729.0221455	4587.52748033	72849.8095224	32586.25596	98494.939645	3308.7592239	14902.3173512	27834.8911009	12158.1193821	19697.153736	1445.76623623	15821.5581387	6502.89792328
ID3	558367.990476	493810.564458	290560.46945	597509.571544	155389.220138	137829.340509	281050.500265	569545.169065	278669.797134	245445.648704	145087.88364	659424.172675	454974.565094	733427.57067	208887.674871	273212.75843	708056.688887	275433.978446	318487.549617	272546.131684	133238.981118	424773.809105	300745.757234	527007.78295	2143136.04019	113126.830323	295794.397074	565860.449489	1164892.93111	112311.85385	289621.808436	263056.871618	1175559.60703	1114742.33415	550478.678678	287352.319454	682332.693071	611447.440976	361287.866021	896612.408048	172994.320155	705410.713516	509162.339097	405237.160986	309665.000294	401833.403245	858871.733406	397366.752838	562804.645559
PNRC2	1069203.4757	396381.470057	606985.055979	1385468.00229	415429.826619	420295.292824	1072143.84073	628288.797147	963132.419602	974427.691841	955779.85448	835630.21981	456074.556531	998378.885041	663008.236223	885969.813244	708158.193831	717583.137739	731851.009771	1149450.59528	683061.276449	1270905.44221	444967.784422	1124733.64665	358374.190479	1001965.22746	823048.794968	615537.380282	791757.953366	1138916.70832	955314.89434	581677.247221	680386.36981	675991.471943	1079542.53431	1047972.30375	704356.53247	821393.802498	810991.914622	1002840.31801	958750.318377	994187.677475	546282.527127	1325972.5198	659211.668085	720731.631286	756953.355057	697036.515285	790411.36329
SRRM1	277481.138471	239529.190589	216934.394293	264121.010748	312228.466069	267484.099728	238210.405496	224741.83623	229593.618667	313019.075895	202112.410406	208279.029458	207002.559529	203360.689782	387548.311525	286491.143437	244783.68542	270084.986396	201782.887739	258063.240416	228498.358137	227974.739135	211652.748694	199665.435973	213805.505645	274328.414328	257614.116576	283938.589571	274433.881744	201302.856658	208780.841478	269656.526579	281613.661872	216497.778302	203396.632169	291668.098135	241004.76623	245359.512147	273810.35345	297497.354447	218279.499093	371496.13254	196986.564725	273926.066105	285451.967739	289904.202829	219865.081803	240940.752078	253520.598429
RUNX3	43103.4088223	134844.587103	138891.474686	84557.2862149	739958.081272	30598.4135469	93504.2027123	186186.643046	98124.5505697	185883.78313	39747.6400933	67810.3097967	152864.300597	291488.873395	111599.904874	113203.549098	90252.6651985	275572.693951	37165.6153407	8348.560329	42426.4541534	32942.9825067	32478.2476305	75861.7954229	167842.713247	44632.1642067	53720.814278	115389.475139	131577.936947	164621.668901	25277.4062351	155628.824455	88934.9717701	213732.537321	19466.0370612	55297.8416526	17934.1495332	49209.8696281	523213.908922	85215.4749947	5923.86481219	84762.033871	48027.8255981	21323.4472528	232543.185648	111714.016991	24420.4397336	79386.5831285	68219.7275139
ZNF593	25398.8191858	30040.6550198	50192.7093395	39143.0408449	51809.1225231	17904.4463427	33478.6866311	33699.5903445	120926.152681	24841.1767346	14094.0713289	27772.5308969	44251.5385407	33345.849142	23329.3098263	25477.1493295	48192.8408604	29594.2492672	120317.029377	56959.2441317	7055.55070253	35038.3236985	21478.5293607	44383.5520896	116594.164662	18119.0616587	32460.1551595	29537.6472082	43200.2764818	102210.625397	46445.7306238	31396.4370057	43233.3974156	14453.8720991	118268.722424	33939.4553139	70499.7286175	57244.8207399	69451.6789943	26870.4401423	32677.5865919	16312.3720617	33032.6978146	26689.514097	38409.0282167	27476.3210474	15377.7584169	46996.3368822	25000.956895
HMGN2	1718165.37619	1279832.21231	1716808.99122	3164722.02954	807801.065407	1015920.74439	2078737.55435	1520058.33661	2535970.5573	4016387.40034	1449901.6971	2010207.36988	1245814.88392	1834812.22139	3085625.61246	2226342.07326	2105417.36207	2934205.84462	2960102.03767	3096880.01967	1420603.24344	2067805.62229	1049437.23031	1835507.40888	2496528.45967	1824901.85884	2242476.53502	1837391.16935	1266358.68262	3364701.97218	2234665.24266	1717054.31598	1390602.35328	1288385.06956	1237381.13501	1676927.08868	2209308.00966	1442961.91426	2032894.10337	3275455.60415	3104247.19416	1089621.75939	1484888.34181	1530546.66084	1235846.91014	1480018.74007	996216.382365	1680694.04183	1294657.63563
ARID1A	514559.95863	234021.735011	313189.075502	524737.870275	504124.495059	256149.083969	503975.171299	326273.010733	487224.128759	415972.475092	349959.019459	509801.313423	244149.744099	299903.752858	467876.750562	523068.036763	405621.813317	393619.425099	216986.252069	266631.746561	374526.244912	419355.233676	337199.646115	353033.319098	233098.416673	550219.158519	340355.520974	356541.380931	304504.479653	409434.657065	452520.591529	330478.664103	326327.393882	280522.090671	250385.310504	403395.281133	325763.053367	426712.098607	338514.96491	472537.100897	528528.299543	367346.718215	305307.605244	370766.596223	313375.658569	287800.278828	284466.527665	398508.704078	299833.451083
EYA3	226526.851647	95671.6629095	146714.22048	102898.975202	184573.892245	180608.680541	215654.795762	125879.557368	140953.563122	169722.887494	126258.689375	214479.123384	61930.3936959	89474.4794588	192504.627668	124937.013854	137228.610181	112594.81782	91898.4963018	101497.057083	86974.4596154	141880.506055	115147.154051	160108.163613	75837.2414134	126872.134799	136859.615496	96619.4983792	116906.625111	252626.918351	130275.649826	93294.0280499	107625.938622	133922.112334	73674.0888651	155923.94548	126172.349327	128342.387159	138453.416524	95934.4759422	180702.674724	158598.933133	66156.0564667	209366.331778	119847.869459	121940.064297	84654.7228208	108499.574658	116884.564427
TAF12	290365.798098	169716.203777	261109.240819	264914.126479	164740.411007	135952.725283	208754.00827	266645.753274	324272.368591	250166.665996	215094.629558	239811.139704	172245.436807	338076.970004	387442.865718	216990.376514	232667.655418	373701.503737	349278.008232	373706.739316	156443.254638	289936.014612	162281.221495	241312.785778	269363.746372	194356.173338	294147.919308	157397.615838	216944.135554	320558.32771	226488.748636	182620.29988	206911.580262	278241.676506	458001.536152	238152.462028	284340.42324	191454.134075	212901.937662	242889.462524	240764.42082	160131.390293	165566.570552	229441.206543	197336.630442	168840.263941	208041.631958	240353.637131	197028.909595
GMEB1	72429.3002916	59469.4482869	97553.8363321	92788.7106766	104482.646383	69245.6082933	76291.9090656	76565.0661183	74511.9132078	125362.729267	74284.0334246	87238.7872529	57532.1095705	105156.256593	85069.0282177	81119.6114648	91387.2196289	80946.8803467	114271.03613	62861.0085363	60335.0784381	75048.6420019	50619.3771949	70510.9452708	83978.8222823	69444.1609466	75552.4830459	83337.4144813	88366.9380519	64730.1409252	60671.5569551	63598.9634727	64704.2990156	81258.9876429	51763.490119	67612.5450605	65807.1945649	81533.8626622	75742.0075609	91815.4494548	92711.2131051	77545.3930627	61860.102229	83199.2362109	55035.7725598	78584.8022113	49088.271247	56535.0642027	72428.1592308
KHDRBS1	1495177.54368	1002464.99333	1465349.77868	1764590.02916	1170821.39911	1587570.38229	1312697.62327	1193958.42519	1895320.64295	1314290.40724	1170163.95782	1257859.86091	1285727.97383	1515239.1025	1102022.10734	1219482.85242	1067356.55832	1649076.90768	1767031.62222	1041679.36594	1374546.52908	1410005.85253	1071495.82155	1220155.37682	951570.265078	1221742.51253	1295186.91392	1032302.07792	1281560.04145	1204975.23948	1452139.94574	1214357.63962	818807.865615	1223742.71842	1791806.86208	1182334.90441	1226328.00806	1051271.39522	1036084.32828	1429443.01039	1329407.37096	1126753.06784	868099.755715	1326169.241	886223.72159	1370233.75525	940429.307422	887077.459825	1170188.6305
HDAC1	541611.335033	478309.015631	1049563.24655	586245.187621	514327.168973	1025093.93323	664743.695004	605601.816805	1129224.18466	1044457.46984	605794.226406	589765.75074	1032843.978	666673.304872	1280795.63277	622444.752051	875908.362528	1174633.28138	632117.611755	794997.431258	413407.811965	629714.985704	778781.320816	864946.756985	843199.379479	609551.020601	464615.150459	695164.017766	518403.317781	882354.097715	701513.540719	534683.924613	465492.648893	732723.888398	429813.786444	661632.797374	661865.27783	519254.630135	550881.67487	975149.043169	969177.953939	555097.551186	381640.085383	475791.723792	562319.924215	588702.271389	298122.524874	487751.928805	618400.066459
RBBP4	524803.680501	288408.616408	522624.5198	652283.257351	379021.65823	596598.630363	563364.455284	409348.187032	821529.791088	1202080.15412	582093.727279	481780.685928	553099.811886	590303.362711	703647.431712	655925.667687	343223.729089	617989.783541	338586.194171	756774.138214	339713.466518	625258.571082	381312.747978	503582.472907	253316.427702	550018.577461	487841.776121	341905.284356	366987.945344	615518.729854	563886.565388	324732.428844	283992.936551	441647.153201	557105.34915	707678.296252	386616.570515	411043.378246	384631.758874	476591.567086	507368.285238	434636.005078	258952.872067	673382.846381	450067.067892	439411.937899	299086.287227	373583.576052	411190.477088
SFPQ	965187.466024	953037.690413	936289.326623	972615.060038	797573.265349	1010590.00138	1006970.45777	724100.51414	1092496.41788	1158599.75161	892862.661329	824851.596344	1345192.26473	856719.077446	1047160.65629	903716.931075	1060407.05433	1247250.44228	929051.973214	628061.848712	963430.639041	1032346.37995	761250.165201	842695.788699	661333.317066	683198.695516	963625.25665	940170.264115	1036317.97098	877171.162412	839722.726137	850954.029267	988305.411698	672818.74888	1021966.58592	793064.5797	1075242.41344	877601.4988	867594.189818	1210434.32608	1138546.49332	982736.151947	856976.356593	1131271.99527	609510.051715	849477.824441	623575.358395	742248.181037	747918.246137
TFAP2E	9972.19305547	17398.2982476	13267.5632343	6861.43921784	8490.6929118	18504.4902302	5983.0343582	13220.1492702	3515.87687962	12745.4027046	3885.34598554	10481.4552422	10004.4372855	9336.22842493	29413.0014462	8977.87602852	23102.5388165	6671.70157746	10715.3151499	6831.73534062	7205.19855075	12675.627152	4961.28176542	6609.88487036	95442.2873645	2719.99479833	6693.47403016	24634.0469362	7815.12539369	4688.10310493	5979.09979289	7779.8358325	27593.9846456	6457.69160023	4206.17099176	4753.94580576	18528.1311875	12060.1351608	31791.0380778	19875.2057175	7521.04260527	12429.2001685	10008.5208136	2290.54807359	4011.51289343	10702.0255997	7884.1400836	14384.6802228	13048.0379828
THRAP3	1082842.11008	569458.025762	848060.691897	1412040.87593	959150.737196	1120156.94492	968921.684304	882343.356218	1020858.7564	1047535.58417	1128706.33299	904439.340226	1108975.38279	920799.998825	919762.06164	794947.430322	876543.45455	922135.375551	858957.325191	998214.660122	932754.358959	964229.872214	793300.981748	986803.054885	895139.990132	1061490.41372	840469.59047	1011825.95089	900419.276197	1154536.09253	948716.014638	732686.628055	823636.570208	680046.924489	597571.028085	911119.583745	732648.815266	897549.945257	668795.03214	965189.31151	960947.025631	946591.456037	800059.714375	1243226.80223	914365.153836	983679.189065	965786.422517	748188.990158	1029906.48877
SNIP1	89702.2163608	74353.216066	86218.2431086	100277.163682	84195.979995	142430.959829	123754.362383	94792.1545513	120818.179452	114155.836826	124858.566624	95466.1516234	132560.028572	123919.39706	128331.733503	102237.478709	94024.8374554	133690.362473	95333.276176	142188.671441	90751.3404309	115233.846372	65368.2207074	109171.829129	88040.6450583	116473.480009	102083.16264	105591.045879	132782.519203	125113.449673	113877.976677	71898.2250535	97189.7013384	97486.9451454	64986.1162814	140878.840233	82178.2356983	95540.1913188	77408.4998284	146055.794628	141132.475514	122051.287449	77411.7050752	109698.056401	92751.676084	132222.22807	102795.720793	88939.9439263	114564.514076
MTF1	105958.001044	55668.1424714	66881.6689384	66838.5903741	79085.6769221	127307.949569	97728.6421772	94451.3725704	83382.484665	94270.4800958	71637.8615455	91080.6172793	102586.132278	71586.5231786	121607.36107	144329.251236	77193.3214214	93055.9357509	55833.2820148	61783.0590852	79416.7333705	79153.494013	75046.3670435	71270.1272635	41318.9797006	102188.472858	57671.9170937	74463.6576549	107376.160787	125810.330317	95373.5847601	68238.0673744	85898.5365347	86266.5082727	39587.7537865	88726.3749256	60250.7856055	78394.7656348	158914.858716	60443.5325311	88589.0468374	112820.085378	57939.8084988	119829.274895	89049.0573973	88045.4639756	107726.622893	69180.472802	100639.334835
POU3F1	1521.68862802	4399.48496696	4148.1056665	3579.40818312	0	1279.47046982	5699.72383919	4116.7956596	3457.43687757	114703.123812	5039.45697183	3296.79948979	5856.03934509	10255.4215286	1579.59317262	13124.7312977	1363.11206117	9483.34724224	10273.7777366	251.931749674	1180.90593199	24306.6254626	1059.21676505	10562.5277266	886937.973287	1432.91986271	1645.5542062	4704.32811164	1921.3060969	3329.57347652	2334.59340851	3303.63424109	1210.08879632	4609.12754746	193.887051486	2055.3558099	1967.77742601	9354.82960715	14461.2997367	4230.34400174	11746.6355134	3083.42994747	2502.24451333	695.617332558	205788.869386	6809.73718129	1661.3768428	1711.15908441	3499.40641319
MYCBP	250661.857526	106701.384003	116341.972582	346444.115499	123482.313361	242973.551982	300055.620723	192672.111426	369913.207995	227656.969326	324833.54633	271793.550149	248328.749517	254831.195617	283237.740596	220563.683404	215798.177184	282397.1675	325968.302091	674042.691605	228500.829126	352429.149872	254009.489479	259707.657712	200074.035103	289404.735882	269324.718157	220373.786261	187983.039222	338936.033515	402175.560779	304305.330323	130107.368931	156950.373222	348606.749385	390486.015461	327454.106778	261057.773748	208012.235014	186590.55271	267472.206273	156592.380511	171064.929282	340071.039326	265299.2465	173521.286512	114228.377574	250510.086332	196799.676975
RLF	105570.011175	58622.9376137	102801.172752	84985.2450307	144745.806915	108626.482974	161980.884683	124632.819667	100710.940379	112021.537044	150347.707246	112524.145356	109193.025972	92034.1165318	167183.102827	109956.316945	96382.1053019	101987.736304	88250.3817298	60575.266909	109879.742531	131182.736085	70648.2443133	105732.986483	50892.6708896	109216.482047	89271.6230532	91266.8845664	177863.962537	115984.530365	114325.887267	228121.742981	95191.1157677	112648.474413	76008.939204	90026.2181971	108674.353663	103844.339303	175664.044949	113926.4789	109310.536582	180060.823889	81032.1799416	90097.479523	100391.10615	129876.414428	108550.734798	73830.898296	155339.057806
NFYC	185329.035949	147673.483617	216991.997724	195603.473845	263999.195459	168414.787124	191508.515137	161407.584355	324524.552083	244615.362361	115657.709824	194283.42972	359816.520499	189969.346214	264801.180722	205138.395835	241889.581673	184272.001753	229996.964298	219711.389435	95883.0227123	190268.704589	150009.900182	186443.798578	299704.652231	136436.892611	239988.044866	206454.913643	163004.866567	232134.128177	195582.772907	227754.651259	193707.028988	199141.452353	210438.12953	134062.69273	164959.359575	184826.855342	303124.302321	189207.811626	169653.405381	171565.362531	174284.216924	191167.748654	131528.290669	198485.454544	142614.471883	210664.776682	194984.449384
CITED4	805922.990598	289812.171946	226206.40819	871574.075028	1251920.50254	415207.828351	780819.134423	138781.653456	394169.87279	242494.116302	837487.5285	929929.659167	524591.480328	115315.824933	1247820.35187	32533.8365233	1281041.11413	34301.4687485	3488667.77094	618471.004449	201413.556963	477348.707448	161357.435168	2213601.55538	2198847.63766	526119.393338	24741.6660791	1168903.00922	645246.68277	231342.688705	990745.147411	412144.094359	589989.676421	163895.345372	658102.15582	113160.328007	1414231.86696	824556.282192	2377083.98576	1401162.77651	60098.5272427	303349.930496	315181.654114	24653.1857071	521702.038691	699493.042069	239429.146958	2010262.41083	676105.173816
SCMH1	254069.190607	150484.744395	271740.205857	228515.915374	290573.046618	249160.530164	224870.699348	217929.353001	207102.568153	351404.52547	204179.099694	238015.819099	397016.870422	247971.341905	375733.320429	285596.441811	348894.156771	102821.918289	204124.223568	280463.091139	165463.456541	253697.076456	177184.486454	235425.73605	225770.796846	158563.490014	283078.987824	265037.781417	255879.307967	399399.763608	222987.940148	379010.555577	246107.773803	218410.665577	153342.988765	228118.58511	218595.916692	279834.543476	377166.190176	196324.809417	310546.962089	294451.022099	240402.058456	200563.042273	342196.927311	293251.224368	339523.708779	200659.125827	285424.975089
HIVEP3	73108.451771	37676.3636319	50956.4589487	45585.7020986	6968.92642817	62294.4283863	115248.213346	45460.0530239	55045.3897214	40837.8615682	37546.1718946	68506.8309945	25978.2205246	45518.9595485	31905.2945386	42263.6458037	51538.5157112	68698.2634871	22976.5063573	39373.7585307	36068.1913666	43852.0379181	43821.7764934	64957.2149446	77448.7051268	51885.614525	73079.235059	38790.5893083	52919.1238342	68914.2049946	25304.1943042	61786.7225376	51854.080643	26480.1031198	25245.0101053	42584.6114351	27989.1806191	50079.7948732	120085.39041	43293.8254424	75710.8169969	54410.1694189	32632.617915	46882.9650239	82153.4229922	62553.1879714	63613.0727742	48523.4863671	42685.7548357
FOXJ3	260337.310448	233161.427428	226742.926818	309149.045993	282605.99125	270683.705906	304874.609332	187524.22771	232536.380145	291468.287986	245028.308503	214399.745266	357196.209459	270057.549037	298220.468992	257514.616869	264353.801761	230131.79456	164017.228842	265226.787141	325202.52859	246071.510402	157181.548669	236247.754925	152680.407233	246877.921829	266944.558255	221628.341774	243596.162236	285352.201538	342449.482454	266528.695642	194206.619952	233058.921834	199861.236694	252276.688441	157878.192409	249671.13867	309766.780647	692596.996965	218706.774898	349894.516725	272802.951745	264347.907348	344102.735309	279153.869893	306531.137698	217280.512974	281705.177701
YBX1	2594573.72353	8791657.97471	6348141.87511	4408154.82068	4956988.34125	2588705.97495	2823374.73227	5201672.69213	5130304.63344	4246755.56711	2013883.53347	2936169.56183	6865656.45331	4303238.63768	8417927.99555	3239728.44977	3874874.16092	3993324.50973	7338553.84104	3014179.33108	1472796.50869	3015360.02024	1843605.94515	2873458.83817	4640803.602	1935770.09921	2205183.0342	3033969.38091	4863590.09071	4005845.01647	2523905.9509	7336108.3945	3511017.18248	6378514.77499	2842100.47684	1647507.56611	3820108.73768	2719676.61979	9552808.55573	3886520.97067	2458411.44103	2757148.22139	2353828.48259	1938516.1068	4254948.06225	5238706.11504	6743416.01006	1568350.88957	3778689.26436
MED8	289232.639917	394168.796801	326889.103806	283014.624635	331076.839285	285715.17739	333092.503047	408350.615499	390505.220398	317769.100926	248482.532036	327802.165715	554331.991384	454287.866381	576666.47248	302139.584335	383924.141617	499348.735337	694248.465193	574626.506597	227240.322236	309998.259659	307463.163609	281690.643284	438891.157881	281010.56432	304497.71574	255154.367502	286233.784559	487192.981272	429080.924036	611869.894245	293901.862377	441324.871768	382431.88371	264220.532178	279346.770137	275725.639859	604722.755267	348576.387254	285686.452135	228589.263055	384653.836266	309994.249509	289868.180941	289300.731423	338092.153636	271403.499809	244387.724726
DMAP1	116492.117826	191332.938553	93368.1954915	111686.3708	116025.966026	210179.183594	121245.583954	90967.0939172	187492.250824	153744.427044	90827.2337813	96962.5458062	187869.523747	98786.1400638	93948.8641859	115078.329262	185919.428568	146591.308648	211000.484421	178219.372456	67411.5057708	123446.41375	97136.9310682	169943.114434	317765.004445	104468.004914	151852.804112	183676.791449	89903.4866165	147308.707255	80441.1074066	188580.775052	162056.52825	84048.6221279	100106.249834	106966.51815	150091.695015	145028.824072	121909.466183	83024.01304	208944.698251	148475.331515	184439.598419	69745.1108559	86143.1747486	147673.853762	130517.812247	148488.389106	152806.996705
TOE1	133690.316676	113893.498864	83122.5480215	165531.62606	99899.3824394	213124.794185	130156.635749	91467.4903431	126493.266105	112724.620383	62997.7888204	115792.546762	218431.719835	180941.24175	118659.131299	93814.045204	144447.722429	207623.742395	158824.391549	156255.017187	66548.2698648	88138.554212	82132.4588103	87318.7923045	170759.372913	83238.2555991	78817.3654694	111498.693446	97555.1101295	135843.160477	84654.9793659	126851.235214	99665.8692802	74668.9868932	80379.2642065	84802.6737969	110639.836684	85156.9028385	129481.029547	102548.653506	137508.336001	89934.0117082	106578.82513	86912.0835871	88720.572836	122459.222419	71033.2514743	87794.0684549	115686.734527
FOXD2	10304.7343411	11172.3391503	2836.06888778	5877.01465287	3218.37693228	20217.0626594	17976.0853864	3851.64296645	15584.5723709	4023.26789935	7402.49042048	24250.2430212	10261.1337716	12277.54935	3877.61122435	4954.42956969	16182.8663902	21469.8924517	42145.2254226	9756.52179998	13166.9116915	4807.49256619	30077.3483027	20117.3790113	33078.5443143	29414.0389872	15235.309353	9165.83204385	3215.7638964	12276.4976209	15480.2824534	11701.0949769	5098.35058755	3121.25845239	9478.11148629	27325.6419199	5829.95277044	2336.68176585	3743.70547734	58335.9650359	17124.7287038	4126.7603212	11993.8600968	2397.38747854	2226.17116387	3438.96693433	5062.81049267	15317.6372816	5183.86222035
GLIS1	5924.14125039	4369.33537515	2433.77945947	4118.75585213	852.926748838	2168.66522722	12533.8051186	4028.33052555	5109.40976922	2819.60471156	2543.67783359	27638.8196978	4019.95561801	3212.68457266	4518.0525567	3832.93218128	10526.9207967	4264.91684521	9795.23685259	1080.88674868	3940.65236796	16935.1753575	12577.5920374	5422.59695195	10662.833399	3278.82260395	1438.16398233	21652.7179342	4163.21328125	1098.86044509	4699.01814943	1657.76563943	14369.1109425	32811.8158865	10536.7927472	7146.8482212	6045.27746052	38015.8031694	2141.78001396	4127.09704895	933.290882425	9137.23886467	9423.486597	1515.92289883	7417.7026137	3688.94736772	17107.1114262	2610.32838421	9731.19012212
SSBP3	284127.340603	559578.800374	172727.95587	248310.896316	290559.034694	358815.271888	225244.565224	365896.344543	389794.357219	373152.90213	130507.260147	227608.376421	309241.89864	271695.87997	161028.126017	334288.136971	238238.295146	232970.662461	244864.391946	139046.660973	168138.683401	250980.618648	294817.623423	272265.780701	1497866.24661	150198.292665	450293.352532	231658.901565	308245.171545	571834.240495	400045.977302	197164.090258	275220.287496	532155.681534	625218.861694	151788.277527	254444.333676	317405.885672	276876.61888	283165.876618	235364.025344	298068.009192	188259.55181	247656.272505	195747.58287	385616.572162	356214.451666	173922.117676	347979.715093
JUN	2333139.83529	1677701.75147	1494314.8352	2885034.79396	898429.467286	1396457.60328	629253.666921	1940705.21554	829920.022726	1374705.55939	492273.941915	1866718.13605	1408427.88399	1212487.47868	646817.166877	1545914.9836	1464800.83703	691137.774497	1586249.85092	315146.407368	373017.493704	688108.630085	694871.658246	1097537.06183	2926071.60133	340472.769387	1136496.89921	2415614.65499	3143662.15334	2980435.3568	1362217.52092	1067112.17142	3382636.35345	2005482.26123	961207.874004	484536.641563	2032028.50889	1957728.69527	1476966.46838	1989258.15444	1731345.92403	6148312.42113	2550135.2114	649205.115323	1469505.35228	5018698.30716	3878191.19892	1686020.32062	4574663.61779
NFIA	284696.483915	38283.0459252	43234.8896093	250489.910958	20758.7088278	168861.753026	244893.574944	176949.430852	136010.580321	297649.940833	159127.930386	180777.72595	225092.535733	215255.185382	64194.403076	396000.434348	196443.505505	47968.0124674	150662.107825	238515.410757	139288.843111	227064.56484	163586.106069	184038.010694	82290.265604	219947.329473	244155.321418	183250.237455	165124.235603	218394.257185	205220.896076	176530.190175	160008.56262	204804.101082	425082.166144	118194.391057	146952.157344	219293.61833	156917.866337	62067.1247763	8699.85092672	281421.008194	128866.789242	310594.930496	67486.9562611	182395.523743	460985.496645	120381.363676	264424.594489
FOXD3	3608.47862572	37818.8388938	1967.33423109	12117.4688504	6152.09876197	606.818209401	130.801196569	924.861193749	983.861232276	2103.89009278	702.964125561	4043.74850634	21996.6986621	1042.25760502	4195.28638598	841.176321156	20170.3991441	509.173006295	13493.283718	0	0	8912.01104983	137.00668346	165.149043296	19094.9570686	0	0	3692.91389833	0	47920.4178515	922.695381439	4205.686261	11426.0733446	0	4413.85824591	3956.53964827	10732.531017	13746.6282576	38354.9061369	0	2940.30871539	0	3382.22848983	989.737412767	155.910687186	220.205046131	472.767638488	2434.6693013	0
ZZZ3	155843.574164	84557.892682	143507.509981	127574.321294	86117.8430079	127078.789786	151237.402436	148635.296671	120068.860745	77708.7033748	120397.09031	143946.278035	142086.653255	129609.037356	106484.500104	118589.874451	124227.931936	109273.258254	81241.3116931	115463.72173	88080.4016972	152657.497196	206986.314791	108574.385807	53452.437908	124515.221577	146570.750478	133033.195337	120910.898164	211813.917001	144056.553928	125406.381987	108593.01296	114353.43686	80428.5159783	117555.464588	81296.2563812	122634.126465	159920.817684	116693.119268	98729.4823651	200799.882612	182409.958322	180147.591366	158029.570196	150583.241069	98805.4449081	92970.7987122	164687.059037
FUBP1	560228.852889	644414.288771	562443.437036	517755.379139	492199.800785	440856.035185	636717.231961	390550.959466	387755.756253	360728.405813	365948.781612	471517.005325	494181.920482	399220.790393	452053.954998	340533.23491	413711.29485	465925.921621	190980.477766	401514.114013	455861.890588	496614.539361	361456.709884	370341.51221	189465.869936	391063.202519	469278.796141	375075.988152	341180.016238	373040.063872	571851.682857	497573.090213	298728.648559	325056.347661	371111.724891	488292.212553	375946.049766	389614.50015	404060.209384	390009.942728	436307.24656	492106.606539	525738.442307	632880.653794	357947.823594	369926.522199	260211.608606	306641.399152	331558.567002
LMO4	175438.811569	196342.635715	1292113.02463	280544.075259	1844911.26485	37470.4956016	98138.5254757	312668.303141	137221.064102	168804.988588	71044.039549	227446.870556	583548.969686	401805.762808	269950.460233	481675.933834	170970.193948	108025.291302	108707.205921	56275.4975314	132869.429497	237844.572568	131016.346323	96446.0786467	219992.766549	46274.2631832	388370.352368	195045.191798	194279.042117	42615.2385447	142153.111143	194021.076413	190707.866936	354993.90272	273472.683549	41094.7626309	290644.215546	297305.499192	1852727.42298	213249.85686	4648.80087295	222619.696144	182133.37192	321488.023345	171452.307119	226090.7461	282095.57875	221067.555163	210778.493226
GTF2B	270136.548359	240613.270409	306033.683923	237417.30475	202468.454425	318968.378135	323129.512393	329780.70017	573961.870392	128773.202776	193892.102209	271899.686758	370736.718148	474111.133233	221101.962912	214664.114146	234560.647678	361006.521986	304310.776502	428812.521594	190703.570154	304405.8412	179312.869488	306876.760608	278359.460613	233193.056454	270906.787761	224610.907045	327584.298787	307483.37668	321626.645358	302215.444473	192087.048157	255972.783678	296392.564969	218691.379653	237843.513259	205387.325925	404161.95039	348946.982926	209358.187666	269240.496127	260517.279505	276383.616483	325668.205417	310498.418089	216297.675243	120063.227213	305168.6852
ZNF326	69557.4991756	76429.3022515	66849.5189737	65335.7735139	34728.5256645	93845.7472472	99686.1117101	56820.4438845	52597.6120124	37558.1923664	74867.7785368	84352.5938423	44907.5900536	55580.9487826	75149.4423917	76807.7915051	77238.4168342	48977.7241768	39434.7140513	64875.2696357	74289.0784485	64188.8150497	62810.5793207	63135.4989426	31428.565537	102063.552605	94598.6925594	68861.9258336	60505.5583936	116301.988477	49520.4159743	87388.578388	73213.6972572	45458.4855674	59725.119851	123131.055808	77010.1328438	63691.7653385	96438.1835417	67442.0974902	75648.7319609	103088.80914	94185.5405114	69519.6820988	59189.1985842	75359.1226024	70750.2108141	66258.2482965	76985.8791192
ZNF644	182836.638681	203417.936496	199148.349163	156525.366191	115869.399648	186777.112646	216013.256468	161955.714626	148446.07993	94530.3494778	159558.841594	174961.745145	90835.0871393	128150.150575	252086.008639	144916.847728	112475.603462	107729.028772	123181.124786	79404.8852147	180051.658982	172268.990969	124105.497039	118699.68034	33073.2274637	171741.940545	146764.218306	122771.964278	212365.378076	146555.124821	183311.226469	143539.198859	121902.253972	158015.569121	136901.800997	191454.196318	77446.5162466	145157.532736	270883.46865	192267.822972	148883.747605	209381.188	135074.607478	203868.205256	131049.94487	170775.384278	105765.469643	73335.5436408	189119.047282
GFI1	7867.05184057	45160.5821298	18456.9903472	12429.3845188	2144.93464133	37451.890937	16283.4611695	26105.3115542	9170.53448206	11205.8756775	4708.77357127	13390.1118368	25905.2305056	55720.3987275	17800.418395	25089.8356983	8088.98198844	55021.2258053	1657.99024581	1019.32761243	7896.97303715	2689.79803315	2943.67222591	18472.1781471	5915.03472584	8589.12683538	8507.43050077	18815.1501923	11935.368722	14968.4551322	3731.70324761	28922.0091057	10484.5257919	6354.38721398	348.656024726	10109.7266795	4128.2988794	9238.4523138	67410.8389875	12029.9690412	1173.51692093	7268.12635121	14173.8772517	2233.73030146	15172.7878808	8210.09265298	3585.07104715	11231.3411652	10881.2704919
MTF2	97514.6005981	87194.7791412	83822.0067734	80222.7253157	84551.1573913	121890.872323	108881.935365	114055.675059	127728.215197	65571.3005664	96435.35256	111518.440192	75652.7739456	100815.184592	99175.6755867	112010.577695	95922.304166	105467.532133	79919.4348584	66054.63734	100613.225375	107015.221049	87591.2083964	86693.661316	42956.8260602	120003.590991	92916.4916303	85879.6220286	97293.8364223	63486.6358702	90813.7125253	164539.117221	78959.9182961	84809.6109122	114818.67159	79553.5008148	67923.9721544	91048.632988	186105.582196	98879.0361384	123083.783057	125742.530783	113618.246588	98130.8983826	73588.1029228	84966.5027531	62586.3065167	56038.6790652	89056.7051176
DR1	163037.352535	154837.97617	155692.755311	156785.160107	85967.1717561	148521.356978	196645.317114	149127.539287	190865.799225	101067.044671	162589.201153	150045.768351	96705.9780224	166799.293617	186347.502038	163850.483805	127664.177957	175607.789448	163170.334619	113160.498542	130906.642037	182284.953678	134845.35892	150964.959257	92661.1123915	131651.443843	153113.040135	124224.569351	158139.28956	160586.977687	170939.781795	167747.3958	127333.263708	190536.42438	177908.59096	160296.927198	130508.927326	141509.318268	193721.278335	177664.761915	123860.223723	152032.650559	140203.760764	205265.880666	140975.442982	106309.903942	137133.919987	86044.62418	134187.592495
TAF13	416420.237647	662210.477227	362808.212228	371043.92082	394481.058271	419529.837251	466380.822452	499081.304548	339368.174155	292207.792208	369528.557812	309212.508285	267911.457622	501607.317566	470162.748644	296292.582659	544437.862128	443820.650937	659555.456272	638243.894623	339539.978094	498850.48359	416241.375087	352129.138625	225101.46302	573737.291911	348566.777138	320861.132127	640228.09746	342889.721453	486409.94267	577621.320751	358221.486293	586932.447398	491193.456234	598751.746146	335820.895522	389817.283308	710788.326165	338502.28901	484914.165812	317126.6033	508461.089597	629068.616091	370761.850557	268390.314325	359960.552268	177392.439962	391029.504954
RBM15	72210.3707309	66872.799547	70977.6341025	51380.880782	66426.4039744	63517.0176818	66372.3923567	69059.5371703	68557.641705	74308.7673605	62172.1342296	52381.6963903	49574.1443296	65457.2592263	89882.8878843	62146.9711994	56397.462634	71131.1964028	142308.716158	36506.0434114	50941.5509029	73853.2251816	48836.2230139	45662.967831	46995.064891	81476.0893177	48195.1231416	44228.6735831	77038.9512934	59576.2759456	50529.6442297	60999.2438635	58938.509062	42865.6099659	90323.3001152	77070.121324	50094.0044216	51462.038462	94406.6934167	66401.6332801	93388.2210909	77168.2994533	60749.1386583	62398.8111384	42551.4652486	54197.1300111	74861.9962917	61444.9013238	51338.1154695
DDX20	79224.7207641	65534.2232369	101905.484394	93302.8558206	61537.6233916	91202.0514503	103945.509525	81841.585248	128633.195156	49738.0031155	94965.3028869	86889.1978438	57983.8766417	94060.225021	89470.2847661	59063.1276095	76558.7506997	111083.886687	73133.0198702	101867.65494	82142.2195905	119765.028206	55649.2513158	77325.2569745	50865.6428972	153186.584793	84388.8532873	73591.3868641	93793.1904077	79186.7183035	81159.6051122	123378.278165	68783.3560118	60456.0705963	85281.1825517	154172.23468	85981.2411034	74335.9879272	173081.107313	95907.6945926	174896.085727	98747.4037713	83779.7525314	124170.525333	73269.889408	105011.209718	64391.75353	46407.9762317	84121.7999542
PHTF1	48187.2310137	66244.4625548	87483.8348079	37859.6136403	45363.6288311	57082.6639361	57690.734282	51482.8218685	39787.2384579	27413.0717068	54851.3200976	47388.0401669	66710.9547896	45423.6505908	65430.3769134	42827.2546775	42037.0831963	47625.7137376	42309.9025891	49848.8955354	39289.909734	31500.7190213	46476.7179943	36612.2299983	26306.3620956	115150.74585	53017.9051797	40021.2461783	67312.8994218	66262.8344484	35166.1472949	49375.0120334	49726.9627721	65887.3390101	43981.9120374	134327.628038	40139.4881152	41580.7278722	110832.093592	42393.834446	44527.7520115	37325.3908213	50339.7153942	83176.0413511	61326.4359237	27355.8548256	32529.2488151	24437.3564305	28548.8765972
TRIM33	188378.715752	110359.645149	170403.371125	142492.948962	120823.598171	164651.275122	189633.645694	143945.586822	125993.275571	117382.959203	155919.998215	160669.929111	178382.078182	112318.182104	161040.673364	112532.065682	108094.24542	90942.6652397	76846.7766738	102155.350993	163732.965171	138097.144806	131584.344162	119787.289583	58368.5667443	326615.848174	183860.117012	110081.881005	127137.141231	126959.20322	227575.578061	146453.066549	119736.306618	117642.676991	182722.851179	370759.830331	95434.7615968	117238.321547	210226.619726	145294.593862	176883.978322	238634.801226	157973.64303	189829.857674	136899.484509	149117.686768	134321.710385	157761.789882	145594.289015
CSDE1	2585176.03988	2193227.77365	4333053.35588	3838137.09124	2261037.90616	2265833.00837	2390069.68616	2788545.97603	2350789.72078	1531264.95376	1903557.21258	2187444.66095	4748625.77817	3012954.09967	2415627.09559	1716368.71796	2330383.1741	1886723.25871	1933407.32459	2196741.95668	1974593.3607	2505004.8233	1936863.5315	2352718.18696	1702620.77687	3649540.11987	2391567.63906	2262495.84823	2819816.17766	1932058.83626	2653732.98291	2988303.43311	1646477.30172	3699426.27167	1537340.02827	3695602.14588	1601714.2155	2339402.6878	4477505.75149	2151837.36595	1818557.71947	3533921.04451	2502288.85909	2880250.63821	3663815.50324	4186360.66381	7601437.26834	1643859.89061	3637565.13447
NHLH2	199.63629262	0	0	48.5789568177	58.682777906	1958.35200762	253.276630726	810.147826395	476.274423608	83.1400673185	2216.78399304	357.947620071	184.386418525	0	41.4466033358	46.5374302064	1072.99206937	2746.5363184	0	0	87.1468175507	2281.27670842	378.989446622	319.786013818	9580.22273319	225.588444638	0	1468.46093865	137.489276696	100.804566608	714.663729467	0	649.457549782	181.406850032	0	47.5853260511	387.240644503	482.870850698	0	1161.61828489	171.231903637	65.599014283	738.628336649	39.1117556033	86.2563833632	487.306963245	0	269.392396898	3156.31825404
TTF2	51532.4489739	88763.350708	125702.063583	40120.0582849	41727.3111739	46914.5595523	59013.7072869	49395.3335306	50245.0036081	30328.7918149	67723.5403807	56008.5978169	90787.4416658	36944.0958631	92312.5772632	60736.0865544	30558.4526424	54483.8372354	31870.3706847	32462.2509969	52112.6213563	38264.1339371	33938.4435235	48624.6733622	24433.2823383	97832.2975075	36618.4434547	32062.897	40123.9381605	161874.331536	38604.5017103	120335.157745	39927.0630372	31217.9017154	60140.0650245	69787.3557242	44553.7331726	29641.0124672	137238.864356	60314.2540414	63256.6366695	50678.0767976	40266.351704	36096.3971378	48875.4966124	45749.7882719	45478.6122659	46292.6265673	39871.2121591
TBX15	62793.3115136	36738.2810601	38319.7169085	61986.0851826	17208.0847535	22061.5461707	71259.6395868	69276.2992263	19008.0904365	23885.7306645	42458.0727495	69680.6502995	26029.9871846	41472.2133029	25785.68955	48777.3527765	49109.8546524	13813.8930927	26705.7035577	10412.4729245	40346.7402309	45127.0643992	55116.7160289	53222.9458059	14467.1554274	38737.2779702	68546.3113209	47311.4568867	71781.0164137	11783.9902708	24071.9248887	5694.85618217	90161.7605787	173005.447275	43847.2051905	21119.3829218	25234.2436871	96988.8954292	13685.9588139	42425.5492028	4240.86897441	125165.246069	63710.0643755	25340.5023448	35206.1570442	106569.638008	396317.037046	22951.6518117	104267.170924
NOTCH2	540267.801894	274106.973338	428097.447438	379065.346676	289443.725817	204818.623655	481435.427737	367658.596062	245397.117083	455519.248664	311724.229071	509388.46779	377009.889368	222020.965766	539241.59999	465092.014498	395495.040157	164702.332335	111946.986076	260665.463622	359169.686037	325387.618455	695356.288759	485077.118364	163603.580808	512420.692901	271172.135014	326199.931534	417894.033722	358256.631265	525421.274536	327805.910647	344049.369171	513769.277135	206841.161843	264817.099706	132303.717433	392541.516168	403616.589138	210375.419602	143311.086624	455970.726026	316132.535417	372977.396236	359835.18573	378789.659745	671508.192611	504819.464857	371312.343447
POLR3C	202802.82943	431281.842099	335008.91478	378794.250551	317991.888355	235368.408967	266696.755531	239689.715792	217688.544457	209323.128691	329713.078481	347558.055831	309281.067447	400267.670247	461941.136412	228053.652543	279129.82039	167325.224525	354118.850124	437181.774486	451135.662658	417843.403498	234530.719073	228310.481162	224547.086185	313372.032292	119054.540823	233060.81422	220687.98598	204126.540492	325683.256907	245928.790681	294473.137261	252406.144016	340782.490373	301154.017957	426810.978498	221634.781407	397015.935132	366950.350128	333217.146536	225910.16958	331048.8305	430215.784262	210648.233258	304422.714375	223685.446358	434955.19616	254108.943554
PIAS3	283389.409398	132931.895616	226068.670905	342165.786299	236229.201728	297071.001111	247865.953638	174255.782595	242500.089429	228601.99831	271731.024128	542033.441722	403681.349641	260173.96136	210035.419491	334359.552281	500389.047643	158436.042293	115041.749416	735517.60067	304675.327932	313560.72164	339802.750243	320052.453041	162137.072266	247060.951241	114010.936071	294088.61837	182223.351453	98798.0102761	472513.284179	279135.544392	385689.171799	309849.758455	453898.263016	309701.018468	390978.195031	452419.035133	287751.097902	281843.795004	203699.254376	254341.788315	445522.422375	504500.77733	169823.371679	251135.583102	118527.914093	501318.828945	246236.345237
HIST2H2BE	444476.270729	1132194.47842	999285.526214	347530.933738	150772.414914	728874.948658	688285.503869	264063.96722	3157280.56594	1223818.9031	204385.264277	1839782.32552	966091.436455	1022235.00631	406728.374317	621751.681323	217323.006612	1522589.16528	291986.964373	589419.075639	2202405.76142	1224671.70204	1724512.94554	724976.239346	334698.680472	1907409.59124	730259.579817	262461.600078	154603.467338	311634.931366	908376.292282	782085.782822	103730.018788	87365.672756	537262.735482	2469492.56556	232293.706535	224360.6527	1118294.95513	950266.378206	799466.926823	267478.587485	969409.383226	1685083.12529	157434.196751	162397.71383	92073.7986769	4780513.89457	150508.540785
BOLA1	129061.276285	334038.650171	291697.463707	225918.450335	578828.725988	212847.682502	148658.200993	143715.157878	227920.107856	535339.94623	245501.247354	202769.547963	415662.233868	172622.399884	216709.083245	107611.611917	258084.043047	396573.978858	449529.839951	584726.521039	126247.007818	306906.692009	107589.163541	207738.053868	495288.246466	194645.898745	330670.419651	227055.752568	131995.916642	303078.313095	183120.61371	214407.873538	184147.338878	88015.7229789	372215.36381	268455.271404	621390.858403	222131.043608	181686.733139	210050.454579	98766.7905615	106656.319311	503244.017687	294336.11913	125995.897676	143683.717239	179215.824454	226995.500761	160248.542231
ARNT	245711.144889	225693.713841	332444.183218	315903.968567	371217.256427	253773.250137	261503.429066	226106.798205	194099.317747	272875.449099	365380.556812	315506.663156	230676.040308	224421.863454	243621.168938	188395.301815	255558.157083	276536.501351	137989.55695	269326.33016	318904.951801	313920.349056	290708.333575	226653.67968	155041.575055	263380.815851	303751.224562	274720.971274	268191.771676	340360.33047	244639.624447	265475.953161	265923.344026	339967.814327	284460.750819	283008.534368	228509.546112	325378.124587	279853.17429	194213.295222	248700.280937	366038.991219	601336.206435	419192.071444	245868.856666	276059.806002	452232.283936	275681.909374	288307.372719
GABPB2	50378.5084791	53228.7090197	63521.063412	45049.2243007	109800.975979	56754.705337	52616.4432027	39786.1416156	24288.9737942	90369.738112	92396.9804188	74135.547706	61245.823077	51721.5204031	88774.8896857	59043.5656539	85766.1979762	72531.248687	43053.8229795	55943.7082608	78025.5739367	60421.8550651	77381.6849433	64821.206177	45599.9418718	78958.0791841	149884.576917	82680.3394169	55682.2368756	35323.9101219	36655.7785389	41053.6126063	70921.9612456	41485.792828	86359.2212634	97588.8038345	99009.5583771	79699.8925067	53874.3680348	41912.8959936	79043.8164378	76632.9376764	161319.150988	95457.2599347	43675.4208013	40590.9624222	72818.8214062	93571.3704989	52275.9297354
RFX5	362002.402626	464108.250165	569479.472839	412345.325071	427956.058225	408231.988385	370068.700696	233480.05884	220963.840918	119827.688741	380568.958587	331965.899186	527030.873829	426960.077905	401147.502673	250615.883752	297032.877976	687226.287769	135708.944549	334572.395242	367899.063247	297375.160516	219052.057363	313401.171566	229657.014444	474997.4992	291094.926943	293959.489443	255471.325378	295464.042648	219083.213974	281662.51553	237010.832762	139205.166341	275682.189506	326603.161627	422101.178063	245944.545162	607891.49473	287917.215332	313945.630319	192112.721087	549388.353032	394048.865275	269488.189095	183198.210046	143112.001108	573653.956429	164478.968986
RORC	76394.1328567	10241.939549	84746.7053394	196389.518131	165159.791827	57188.916125	126979.249411	62845.4459948	84408.0947447	232659.455626	116993.805053	215127.420537	421188.819098	166700.206601	115114.565469	159240.832543	165696.233869	185730.168186	237156.345673	362789.637503	231429.146697	222511.536172	172020.24515	68065.5739905	161919.0262	241942.486748	300536.72221	173623.247641	62625.9041615	235242.455583	125207.512785	259256.120359	86048.6779776	23512.6617923	188302.190351	92456.3178041	199118.990088	173751.420578	38335.4168553	161745.182725	140930.997196	138387.923212	159681.128882	359105.701276	342212.550275	135871.884317	10977.4339473	141828.394128	91595.774247
ILF2	1808891.73495	3139432.0972	2878777.03252	2833346.29528	4552923.98244	1639113.79456	1514258.90251	2149449.31639	2915646.66645	4099972.65127	2503330.13946	2025941.4735	3438198.43644	2135260.58982	5400065.59278	1866237.2526	2035273.91306	2584326.45584	3244328.25267	6326723.04143	3555059.58312	3078074.38858	2218458.10772	1590352.70602	1402653.7857	2506747.28564	1786983.37401	1410196.68666	1850888.47874	2109372.43546	2157973.09841	3653387.25933	1162016.28147	2064877.82556	2955491.47155	1662058.11957	3420036.46635	1738451.28176	4241271.84445	2651482.99128	2179743.88575	1086197.12054	2311511.83032	3873680.3668	1490980.6684	1957816.13082	1043912.19118	1731574.16501	1293536.68497
GATAD2B	178569.217667	188510.89056	232054.169726	175720.747156	450338.213763	216105.075592	160908.560518	147270.148921	149780.899978	224482.934686	246528.071168	183955.883977	178316.288424	215496.056251	215540.832574	154304.178494	171231.519541	149846.524491	157459.535722	187983.26479	284998.097376	284370.965784	177676.56231	156679.269266	122772.185504	270863.524594	219610.409501	173128.611058	166238.453602	136470.248114	164367.558498	176046.442031	134828.058968	155555.856382	173452.735611	218481.253932	197854.871369	169211.267328	197655.874881	171415.5376	225383.36919	212545.30645	164065.861916	376821.806631	161049.151501	191097.990946	167684.510989	227652.714426	166032.124757
CREB3L4	421206.626086	239435.606435	318725.238191	1840247.63365	560168.257721	525682.602783	732583.180183	223995.287573	1172106.34259	1682686.07995	1147757.89812	561188.744157	1964428.88638	434530.403203	198894.713663	1265143.90181	1429653.70951	1539894.43023	999134.137595	4925668.2417	1761063.78934	1520922.57455	594030.407743	736572.353613	654347.294625	563539.355199	1578948.54865	917997.323433	338104.643209	1005834.23119	977085.223942	170776.862347	395425.076898	434955.198044	2863016.32086	437800.779515	2547337.87048	855474.093774	231601.260117	1036149.70991	779135.660758	263779.385381	1271790.24489	2048646.70082	164742.726961	276494.430251	52637.7274629	1488113.97599	397292.687281
HAX1	565157.745552	732663.61853	726433.617807	985446.726571	1260842.09981	695859.8882	576849.422169	663677.531502	1191639.71291	1346871.38607	957129.726768	968860.97577	867503.831522	1541376.05495	944028.014818	622733.096416	715650.657535	1018146.24193	1515467.60176	2681778.05285	773259.670193	1048718.74767	1195701.2577	550242.279653	1060449.18232	1150817.32765	843463.488475	623333.448765	569161.136831	1095452.13636	944597.557988	887244.247505	577555.958782	582109.496256	1459604.03634	1134969.77847	1302977.69701	591187.941371	860491.800069	1040332.00384	1137117.52093	498469.756383	902744.332432	1073697.45751	641253.349215	673141.586743	912743.63093	1017393.73279	695227.315686
PBXIP1	635939.401337	972713.445259	958438.803852	1154936.3911	807832.667403	412956.468099	645604.001441	792795.290153	486836.56028	1295596.38868	572769.036141	821490.438707	1174722.16171	1107681.39504	712507.460166	878212.630888	1091114.32309	602294.746431	365044.344361	1943505.01115	875777.134173	731968.951086	868965.121095	969451.129592	1665576.85886	490411.28507	1502128.48213	1453517.62893	782922.278945	532768.468476	951225.668919	655296.117628	911599.731412	904177.653621	1123717.19072	778622.416512	644463.770587	1136556.10499	1048429.99394	474799.956304	376044.624577	723076.062425	1220838.27552	1614099.54824	802644.25	1111332.83959	1875969.61162	1414946.47166	1226471.52352
PYGO2	437847.527867	676115.192882	489088.878468	712282.303171	602714.2255	519115.20266	416117.017878	354849.282064	587713.979197	846394.984326	629373.270663	606409.170498	945741.255592	676202.377968	569992.642618	342721.186888	543329.708349	786872.246825	449300.740722	1012117.96782	596586.194515	914273.396868	429166.302533	493405.014196	520680.790133	608997.415452	693694.633089	501624.110851	289049.122642	512537.000564	400643.383644	551177.436271	372646.253873	341808.835777	904878.026548	662916.630523	788189.844883	597358.531732	648483.528329	588086.601001	788095.331789	341235.301773	708192.548992	970301.478406	340460.83614	327617.427881	349786.188947	689474.737215	349903.687073
ZBTB7B	454121.206804	476171.570458	458812.911827	1020337.42776	1075001.84408	274070.391474	391490.565134	486088.745383	545278.050669	786940.947374	354821.787673	553124.050163	1150367.28242	304572.911145	307682.284048	852186.640863	1220296.43783	362972.19554	455525.237679	1726407.54292	493351.514354	568286.895832	611708.255411	466113.006024	1613862.39094	340588.301223	801042.632323	758727.633563	284923.041263	662297.692478	595985.822569	520859.677519	470369.054375	304244.835388	588696.420242	543473.490688	948133.464979	757693.476548	406929.056659	421329.084259	540750.670035	349542.441988	811012.860828	982225.252902	355009.033287	454437.199757	459062.321091	788187.154202	338725.408371
ASH1L	246946.625561	177714.684904	200981.024827	238491.753464	291922.594017	168668.47426	218387.747631	149671.491752	86941.7437064	217568.439279	368470.679704	287773.289462	195559.298024	127087.010059	308717.197652	199065.89477	203137.815924	114074.054192	70859.0778182	148748.114498	370764.317526	290512.380281	275822.316777	143334.762535	65643.1388734	371233.670325	277516.974268	230701.332049	179936.169642	164571.404265	324264.692173	154321.92205	176831.754494	170998.632011	109889.044525	343160.54451	178289.606746	243604.258515	140031.634362	211066.202536	235337.340162	375457.662856	215773.121294	693587.820858	240399.926853	235512.44357	286897.988925	246258.34001	229594.503689
GON4L	103250.945495	121389.315722	88054.2133806	115101.154361	133715.802685	107856.38001	101096.569454	88211.499093	56251.8363845	103209.636322	178362.775659	172102.693344	149944.516244	78957.5761361	157828.412674	92170.178525	122551.371824	89332.2276196	90815.2880416	112250.615229	143036.651266	156020.065168	123183.376559	83455.1785417	70616.2716124	164543.791144	97983.4689202	126330.396876	101280.768528	98522.5523744	136004.204357	99917.8308447	119829.981392	71026.7569301	47173.3174733	201714.968548	149583.971105	104064.055077	92555.8098606	100429.476923	150037.330283	140319.09542	136344.746295	185660.248621	82618.7238365	108206.003195	84758.0682511	174977.548509	116950.413811
MEF2D	328025.028227	385014.281828	258316.23392	451907.225936	409199.026441	220727.848101	277583.560709	267684.88746	262394.176501	164772.727273	305832.539042	373892.872206	368036.847137	275709.31623	321681.12205	328730.917705	371763.426722	243253.783856	198275.019547	546254.322834	377635.542169	339336.50111	276775.507288	233829.988804	366225.715123	317240.218316	491707.366707	402699.205585	320681.052359	285775.370582	260381.580214	190056.121791	413639.702881	339147.286822	237106.171774	470866.600879	368977.125243	403248.748293	211675.695385	461073.801007	506214.187717	347475.575068	476292.703305	806942.191417	237112.773396	267857.142857	371055.226824	535249.492128	308070.972628
CRABP2	4660758.88733	905628.64774	197444.414949	3503151.30423	17530499.1501	6130418.1051	750589.110753	2845074.53961	20322776.2489	13986035.9077	3573975.69803	7796326.82796	5488200.85798	1958315.62719	4973788.51809	16822409.0351	1308605.4231	517549.365133	7603951.9511	5454035.6363	864881.01165	16650943.3962	24026085.375	500779.041818	13401613.5188	12518235.9461	700780.700781	3183787.80584	1623544.93614	6366746.1387	15698900.2721	15002404.3818	7831049.04238	2571819.42544	22891670.2633	7555885.39925	22225827.3848	6377291.34771	901609.069127	7934487.58702	1615542.07233	1470105.45724	15382304.2906	9451542.41128	3485575.32394	5251179.68848	488165.680473	6752389.30699	2821201.30221
HDGF	1409079.87717	4241564.01499	4360197.62335	2307659.10551	4518145.74169	1806290.24353	1367389.35224	2014776.40069	3112616.03465	1836513.47042	2514112.95908	2388090.63005	3874254.05306	1882830.76569	5902040.35135	2021857.06578	1599273.39146	1502374.91376	5066332.90569	3707220.43199	1856173.32785	2135737.03154	2238594.96763	1559131.06201	2178100.20246	2415923.24403	1902849.16587	1350155.20614	1616532.42858	2453949.74878	1612877.73555	4181966.098	1179250.34647	1503144.18312	2815666.17668	1944448.40362	3808322.40955	1798544.31914	2750286.48818	3241463.34831	2716300.29074	921271.2341	1674122.2484	3326265.62596	1564576.27706	1618081.4965	1111014.55458	2201004.75935	1247088.15115
ETV3	144440.399789	226729.483578	218769.570137	197340.752792	278962.789561	172060.301002	189576.120406	205668.886516	129208.029747	132972.943161	296162.611683	186337.860499	143979.881999	236443.200559	391023.897544	215366.623087	163770.993922	111764.082215	64465.340437	124752.305287	345489.19889	238209.22266	181695.824571	125020.903698	187307.675025	252033.462367	164693.470195	203295.818603	232110.505934	163322.049831	270388.019291	204670.657501	143365.760973	159840.081053	212181.987367	265479.165483	149678.481527	212618.980611	166820.716952	241142.736201	238874.396697	249590.644422	217473.738025	315478.173156	146491.561648	202381.471747	314664.328152	163485.2666	178730.430329
IFI16	400820.181317	390735.318239	973997.214144	315611.820711	121791.006549	129515.301934	480195.603559	805255.479418	262647.64723	208670.60717	273721.164443	391903.361946	319708.15616	650191.400299	340887.226606	318721.866978	442247.108992	651294.93584	216215.38597	68007.8670201	694414.847286	311432.497242	248546.376195	361745.471682	559284.343236	263015.012154	468350.298347	428169.788784	1035533.63913	219047.056994	366042.84381	978900.464334	545632.890827	816469.478822	296424.368822	228020.577027	122639.541244	346920.165717	757776.32831	478692.779866	18842.0510798	510333.708628	320339.668067	687547.435675	1341280.67577	639824.354592	336151.454253	483792.704563	501507.772696
NHLH1	1321.60705656	15920.8829764	6774.28063067	1000.52180786	2071.91648001	1152.39426371	1171.03560534	752.735251721	2202.07567653	5870.8630291	1144.27090591	526.586617821	8002.0504237	1017.93961642	2682.82262451	5613.92477902	2683.46399369	932.424309421	6101.13795375	583.482975444	512.816348927	757.817537457	6913.51868328	940.892052362	2437.8343666	1659.34691866	1587.9844206	1127.10959694	1011.32133785	889.778271704	1802.33404512	4228.36961165	1910.86983336	1779.15080776	2020.72216906	280.016343154	3924.46493718	710.364628388	5853.12628278	1253.18504812	629.759942123	1737.08135013	1303.93982521	575.383825604	507.576579744	1792.22678981	1346.73294132	1188.93175869	1350.79181094
USF1	370886.41531	782333.015338	610146.348636	503709.130873	542360.577528	410561.528235	474452.895775	489335.109897	404580.501416	502694.636492	625849.322099	461772.675537	1020522.3503	749597.558996	550974.360292	373773.817565	758918.241887	2271813.7772	702871.464222	1190099.70206	566868.970277	634521.384155	471514.36614	421040.274751	611677.336611	495322.774215	556837.885605	538967.227495	370827.030827	346403.263512	359900.493446	981534.861609	474101.638893	311350.248924	666357.260116	570059.393092	650873.83215	487510.989456	717825.915085	591609.026556	662627.426225	350999.867859	651263.549843	565136.673178	371034.731635	396423.38017	409717.719056	937693.49576	344021.910694
DEDD	244683.503756	415236.418606	493273.29044	336206.487662	502136.964563	217028.105962	273915.232327	328040.386126	425781.206661	380709.390721	390169.161411	309900.844587	557464.720933	334484.517548	546434.19282	255149.024882	343907.422933	1197866.76928	453983.707029	482011.076911	346175.394757	516087.328232	273841.34364	258284.088134	365870.080199	433682.855919	349578.867835	283996.991407	379843.905655	247775.176969	336232.944476	429899.589633	300693.8267	363374.618703	585860.276506	355788.060856	485489.265293	329636.446335	364713.637938	370139.598574	370418.993717	289777.483334	411875.655937	563013.583265	220893.333105	301889.643541	455166.13564	405613.489052	307886.980626
NR1I3	3302.44033259	4280.1242553	5635.46359031	1219.26567231	6560.91212746	2298.01413279	1651.1424874	3599.72953384	2639.15938116	8062.25961424	6566.55699111	1225.09062161	8624.62591014	1447.24012131	9929.69069723	4565.92034221	5263.71599682	11810.425794	4967.95080309	4072.37573209	6495.51858928	2938.40597353	8733.85479923	2605.90699179	8389.18368369	5661.96280519	985.174963995	2039.48293281	3450.79364332	5175.11734579	1164.74587938	3435.21142458	4050.42732626	2069.57497139	1218.81917751	4668.73239979	2552.52056497	2616.68882818	5547.72867005	1325.2289692	6641.88089276	4714.82246635	7527.78116403	4283.57154379	2460.13383866	3613.62810346	3133.14057059	2151.3489342	3142.58342945
ATF6	297179.938875	185287.088103	268309.250618	293577.862381	470458.179322	222628.654549	306015.350911	226547.504065	218369.434522	151137.704566	480059.279794	369055.961906	203942.648895	228161.682312	302724.740538	222706.004722	226590.895369	1039687.36349	155083.928648	323307.047755	522352.111522	364051.20912	341796.008347	205652.631093	141603.397393	361865.356621	297796.368772	280762.262525	255719.355235	324444.001254	421589.366541	243510.833632	181170.38427	236493.925539	221211.708467	389221.900713	311140.610388	238313.220067	239040.531657	288106.289571	270853.605161	301574.299349	290053.968016	722850.266223	374158.419219	271358.650438	218049.962127	323905.194649	243475.451638
PBX1	350575.509383	82215.9921396	115715.705557	417450.674298	215796.648957	310424.139096	173939.65157	126943.745717	521269.210846	804006.11882	800041.099306	378441.407886	180277.271433	311823.502372	377841.521619	548167.368936	231330.682198	211624.716237	223935.479501	211345.804451	929643.64485	554259.940626	198035.646174	356838.670242	127468.65595	795887.951391	328220.573879	191869.461336	142207.771629	122902.467975	525474.919857	69362.0565107	159725.570726	192428.786703	346915.20582	198562.370777	338314.199097	305521.887742	109330.258476	576096.638906	308078.700017	260575.909076	638722.965089	1364666.00484	85543.2611798	194167.315026	209338.079536	186953.499512	235065.888788
POGK	203819.456325	302110.639859	414406.674272	313300.488168	520838.571577	201131.169288	273174.27343	230271.972133	229697.241787	338712.358697	374823.367482	379067.456514	464843.863156	254319.886549	561130.231049	242267.383433	247972.544296	198427.366469	223507.800839	217823.387629	606039.861927	422280.431255	250781.879238	164951.013015	128598.540319	361523.872121	261264.584181	181802.680148	228703.736431	187567.306474	321610.630412	352532.713276	185281.720973	266699.570949	308912.931647	383817.088984	340480.465754	257862.822582	268977.276673	365404.906795	376961.345356	229013.015388	258895.818564	646372.104767	211892.073019	198463.447057	143819.855358	237584.068209	163719.309289
POU2F1	55739.0947823	40581.5925902	64006.0076672	54067.5648173	46014.0255554	57346.2532487	54750.3933723	43660.3409181	69147.2451011	97209.9258797	84317.2647554	80941.6497505	44662.7143364	69669.9421684	68211.9531091	52641.9280571	43171.7742683	43994.3513276	33253.7773934	31375.0904103	92682.1498004	74981.7539115	74401.6477434	56749.8156984	24963.1287214	91431.3178649	74563.7767157	43827.7707976	40213.8547787	61549.7562704	56032.9423362	41899.5661339	36685.8380742	46980.3897253	91580.6588845	70683.8982074	38289.8338987	51315.6260329	58883.8078238	59610.6548429	113178.883298	64673.2636536	38917.725171	94457.0001732	32909.0415408	41464.6395415	49988.9129161	57096.5111904	50877.3810544
CREG1	768270.471531	897674.426136	1865903.01814	1338999.51592	899870.402857	452393.510147	890826.999285	2211926.77232	786422.829778	804690.998657	1186090.13369	812270.289811	868130.992729	1342828.41303	2198422.93067	899150.017965	939936.761597	881259.799459	709433.988607	1290313.06887	1241328.95217	1103581.17304	1067694.51136	695281.773031	772740.268616	969350.385462	1443882.39626	1275842.84797	1056285.33165	1244321.36975	853674.883484	2143348.6309	957283.370454	1042955.94207	1122440.41625	1141002.06334	951304.231946	801451.383922	2635598.20219	1195668.6098	665925.921656	1208088.20065	955823.51953	1791705.28999	1732138.50139	1134356.47571	2108501.80802	943568.768289	1279443.13071
TBX19	16098.939957	84586.6428292	235267.961487	15167.650375	114180.90083	9834.10444282	10923.0296744	18867.6417299	9285.30840519	16331.5405886	23401.0146029	14340.1722463	30024.2846422	22653.5990771	146290.337986	12028.33703	23074.0074662	15945.1289524	16078.8489602	11481.5114477	8349.07293756	15977.129272	14105.6401167	22387.3634008	14134.1919998	10961.6994335	15512.2173219	22046.7314136	13645.9332347	8441.67071294	16043.9193849	51648.695338	33303.9409641	24756.5883471	21617.1037365	10724.8869945	29715.1597314	25585.1543203	39762.8477489	24339.3483216	15401.6453693	35809.1834414	17512.8299298	14557.0372418	20867.4933568	21789.733106	12303.7551061	22559.7111689	37971.8059934
BLZF1	191334.950452	178460.539284	306343.255676	164083.069571	253699.935532	187443.391433	208566.959279	143011.06042	177564.545115	206141.57462	295195.982878	235127.334878	191005.97542	249970.261962	297985.041838	156544.410749	159710.487673	144444.784278	142249.54869	235868.792357	515245.178716	425283.716173	296569.40128	142580.086315	63176.844562	344982.684066	247290.037866	163470.77314	180084.084475	222677.261249	325996.973821	241009.266833	138123.140712	192425.685725	279443.012079	329250.656505	265857.147225	166576.507231	166465.856773	385704.769217	215069.120004	180843.886337	194998.47384	576062.929142	156144.308331	132393.153554	191042.679967	370267.949021	169478.756529
PRRX1	413471.304982	296513.33571	473407.367135	460160.887049	121713.660724	107659.921547	561651.455135	395826.720624	180444.158942	221404.963516	524099.498739	717089.113309	118499.193175	200646.090959	267140.940384	420479.621698	334510.014093	145357.655183	291372.583897	17364.8984266	563717.175495	656693.468303	580845.766058	524647.387386	103428.95152	278678.990754	105920.79474	351726.537055	676954.514415	67526.3765402	435692.999406	186310.683297	547090.128496	1274257.08705	531212.336185	162796.988913	132091.653429	429388.47552	181268.376827	235229.642008	5911.35785789	310121.20553	332065.26492	164818.285158	222525.579743	265269.691038	319801.220937	250733.3226	466137.965869
ZBTB37	27187.0239854	22026.6582943	41892.9950728	32372.2940291	35012.911807	26815.707371	29494.4064363	19609.1258592	19981.3704036	46561.3230824	93253.6520128	37981.2028583	24592.3325286	22719.9948957	41750.2554955	24917.6617324	29640.3199143	10845.6283196	16710.5479228	13599.3441889	68236.1775316	75525.7550523	31583.7993522	29522.5805794	8326.23797415	59709.0776793	38056.9636632	33022.7071555	22772.0323008	41339.7564809	38091.3910964	14635.5563524	34371.4864214	15462.2684104	16881.7208688	64489.6024067	34140.134048	33206.7361595	18197.8813641	32208.5426176	37681.6460166	49521.5886678	30601.0208378	58870.1548953	22641.0930258	23269.4645531	62371.7604179	42844.5258264	25724.5805015
RNF2	185733.435927	135182.537836	318239.171657	254535.96239	204477.164412	126281.854054	205057.161107	157179.701951	181777.481436	84584.8530771	227247.987805	354889.773651	135017.464257	129712.323955	146720.690883	135274.700482	232233.867053	81166.0900723	97900.5702612	307593.26468	87289.7657187	310986.537859	316599.874525	190985.279141	52445.1986624	313111.905624	51861.824511	167856.219564	141278.586481	142776.316265	364155.811715	197403.704164	128020.334471	172859.898731	254738.166994	281398.96252	224090.108919	180479.57502	141904.461721	192988.651325	192515.959892	200824.199031	164287.311704	109562.206296	112987.973548	124846.04295	103026.085575	316344.538481	182751.552532
IVNS1ABP	253852.489205	318042.979649	621290.131752	403295.337336	700095.413394	180079.215698	331385.796557	462829.476556	248097.193532	403700.395872	395289.113235	297664.973604	425212.888396	311493.71643	377510.430071	302429.632386	330790.524681	275178.534507	342464.706562	238352.409129	332441.104838	376433.242362	223655.419124	180657.681945	241822.046874	295827.911043	295048.346505	255396.154594	372016.001788	249698.015919	295617.542753	568326.050842	361588.001356	421720.42495	256556.902225	502576.451048	389815.878085	399712.675301	372563.717284	335704.392912	167371.956662	366129.687896	265304.821659	649995.222866	475436.672597	338732.01605	198756.07058	329934.261031	355311.7822
NR5A2	19368.3980338	13891.4460506	4635.61899593	19336.847656	2810.06584906	8093.85296986	14185.8128516	25862.9967301	6855.59556765	10077.4637636	8807.22261315	12498.333788	6714.0780985	32789.1291841	6408.92572326	15831.4747406	15842.4674279	10257.4212267	3723.63934857	2769.74945428	12026.6028455	15196.7673025	7864.20900557	8021.18787663	8214.20614147	14853.3830437	6515.02172867	20318.4156884	51778.608933	8648.54906259	25208.2966004	11947.4702503	29501.54834	17494.2376093	12561.233874	6361.24969741	10516.4486271	8851.6234871	16538.3016523	15296.8485276	3459.18913254	76306.3112027	17832.2410554	7413.53781067	5464.23747464	28986.4883465	31246.6323436	9339.09382974	72193.4471794
ZNF281	209210.892037	176391.934654	190763.188992	248987.319664	117163.384951	152398.684613	289294.836868	179591.354128	329652.303295	109637.817362	334796.69586	383455.345899	178387.663485	124541.671437	314847.45845	195579.354549	111494.82513	202391.485128	84655.002911	225542.066164	448677.42863	468608.820752	305471.780789	92054.5828077	28560.3252606	375217.242848	293838.496086	190126.503467	282235.922755	111190.958436	277446.03766	98152.0193974	232988.422533	183423.251715	261923.938899	323579.964396	178041.267659	272076.836135	198777.94131	154973.548094	391994.288253	234253.986196	151719.340461	664778.818543	114145.988434	121616.885228	118564.811737	237698.629057	114312.274745
ELF3	476435.045333	939165.130394	824125.764849	600724.448111	873115.093637	266624.889175	427053.446944	275040.120265	457287.303788	373594.823554	642508.702431	479956.992025	510907.746238	338745.2298	737843.003169	405743.966138	800929.237696	291972.624954	428822.014835	346935.419178	582997.214329	285032.267644	601479.040697	129636.969417	312745.167958	775431.375348	193114.363605	330215.369115	529577.356754	892464.455099	890825.783215	798960.253665	402511.13827	323528.492289	722782.024182	287232.439471	929491.231694	488776.651287	142670.032277	1624736.55208	573803.454876	460389.43133	702904.458853	53155.9597705	488545.563743	701062.619296	32708.5385331	640366.509714	453883.377158
BTG2	5347322.01838	1985646.98109	710712.705896	7813794.74399	275596.142184	1784181.1178	1101697.7249	1719796.55411	1595081.54345	1129754.63994	1139917.44694	4187707.0092	1366123.70657	3348521.22948	630765.949272	1026721.81637	3075889.21296	973431.025087	666722.817716	1880588.90992	1214552.54195	1132924.8886	2542101.51551	1468720.93918	2690514.5834	773451.993066	3837200.4277	2310222.20499	1692285.04172	3132760.29903	800056.213374	484054.218003	3169468.7889	615107.157489	777711.976999	1513457.56037	2178043.87722	3432979.55186	1369686.86626	1548606.71863	1931737.75284	5047032.03708	4378013.0407	2049722.12946	721120.46289	3953356.12911	3574727.12457	2706624.42321	2027551.67563
SOX13	204362.782742	242631.595928	183154.819429	226662.937499	157985.656048	227063.359378	112744.21478	122593.841274	285376.839875	197847.045602	215965.434463	283160.971351	514722.434276	95932.1430989	280030.277642	139618.76321	332817.440855	248535.270179	206002.415128	227998.233455	167422.938507	225827.247952	183109.690948	240964.918247	117995.249139	190750.292125	225934.592511	175325.442174	120658.022885	83239.3369129	289333.943095	33453.6435782	186001.648801	89601.4395227	229096.940036	144455.242451	273302.420279	235312.304085	189822.109165	157841.021311	324772.718918	238540.807612	202731.85047	133797.025222	74294.3841554	164857.546489	196640.563114	223682.715514	166046.834306
MDM4	108485.100787	177979.176683	143358.6215	95177.5974033	96440.9393918	98125.7972721	106334.671151	53863.1944964	97787.9234431	97478.2660203	207568.881644	113869.871411	134144.838026	114790.662281	103151.337237	64621.4452148	129993.637405	114651.32489	94252.3001255	69420.7456902	124752.445299	154034.882108	77394.413354	72449.0909783	50410.206403	129142.874569	136948.538111	142978.258557	79634.8119884	71783.597624	73261.9127017	46599.388526	120511.045135	62053.2826435	97286.0689277	143171.277703	132196.936827	124294.095543	105275.319377	110505.010551	188944.104217	134545.640182	115872.924205	184338.593128	66741.8130043	81495.8311523	89678.3691115	155711.124169	92032.2481627
ELK4	160098.971852	127436.506239	223124.562589	105115.084348	195496.12143	72837.1096734	149369.343173	114825.582165	126939.814893	90052.4565887	170695.599301	128633.884663	98627.2390942	194745.910752	162169.137313	130062.957119	95295.2517625	107027.016908	63942.3326446	61643.9768131	155606.628608	156605.035018	137084.134776	91586.9641845	60657.4680978	155493.889363	120605.128017	93778.745763	197379.224024	99262.4900291	150403.20757	74123.9418186	110008.869684	139630.574604	126399.53899	145019.972903	72818.8211079	97278.547355	219097.110212	143350.766327	117991.494961	196964.333302	108812.64365	258578.069359	131382.939094	109332.476429	161509.254233	121049.383547	122535.712985
ATF3	1125459.74206	336138.075179	207615.268669	328159.017935	274388.540746	87416.9695451	60716.1671147	652239.661265	201804.428775	144091.995406	66059.8356925	172714.023828	75545.9225422	298676.459667	295142.031784	42824.9527883	129683.242422	73744.7616243	186369.301512	12678.1535056	148514.851485	82004.5933561	26952.538066	65830.3708245	881838.647596	55652.7158245	89157.2673751	414249.417238	1126244.03965	100477.550606	317773.091908	103084.750483	1029861.37321	239962.436736	96431.740714	45743.3381268	732374.502862	115030.847646	202888.295914	810856.324701	47623.1950529	1765060.25572	486133.834327	30151.2233512	177910.302617	1157465.31015	741475.774796	233822.264908	685453.160701
PROX1	12225.0955412	11395.7238856	47062.2811834	3323.59397203	8277.55155775	1465.0726676	2475.46538749	16134.7946847	919.504717979	1825.82218177	1905.24694497	2078.58094145	3543.11369766	3896.3250252	21144.6568992	4992.07243175	9062.98520957	951.733773415	525.444105358	209.378761489	3533.19436102	4630.70702008	1696.59329189	2546.71367437	4723.91845887	3366.24889612	1002.91318929	7280.19631292	38322.8259112	1362.30687597	9916.90838053	2774.52926643	41251.8442646	7405.85473166	1095.73981516	1567.51756343	2689.33499869	5658.98757348	7561.27150342	21487.3230681	180.787940374	123338.093984	3826.46100936	2907.13193463	5537.06467379	15898.1235892	79310.795812	6883.12208406	46630.2698506
TAF1A	53432.0330889	69159.8023683	57138.8926259	36443.5810184	27514.6214418	31190.1066148	46747.579564	52757.5540487	48206.8214425	82944.867651	72939.2662842	68531.0192459	61477.9349598	38301.0768798	72874.0808757	34669.5978236	47095.2156606	42833.9373194	82642.284492	46362.0556923	62652.8724412	55685.5844303	41660.0647311	22133.7368575	13489.1396408	57782.7203223	47237.3529368	36421.6025006	31695.1251286	26783.0943533	28854.5172195	36365.0219293	41391.0027295	30084.7334154	41146.6497906	62223.8873103	36313.1403133	42136.2778416	55705.2844991	36713.3438002	58987.6015923	53483.7713919	48228.4076865	141510.911699	30444.6448811	33161.8911163	28274.2809646	42980.533327	44098.1617607
PARP1	1004828.16257	1027273.90981	1018644.10886	1028381.92306	1154804.28257	575673.625249	915949.126878	741177.963893	1237011.78775	2232662.31174	1067806.76236	739111.805663	1118049.24506	689941.386977	1981452.3694	834195.484639	672009.948998	1366485.65136	1327494.77024	906896.66623	1285442.05099	931297.33411	1133257.25131	374006.212621	532628.340695	513583.84988	466951.924617	599260.725964	596933.936153	1228313.19166	694185.294717	514550.75276	431118.213778	420949.066499	734311.413178	716981.124048	998422.34786	559926.091534	1242341.24855	783030.887738	787652.258507	357366.291168	764679.919841	1873120.7826	454250.930496	442560.293634	479821.761623	760426.589824	393884.575249
TAF5L	158892.422962	200674.469863	168327.350467	142659.978426	266054.417135	97128.0115606	109063.922608	140311.674453	137953.241213	222447.331316	137902.222247	136132.352009	209425.264537	102943.191973	342087.917862	99283.0494061	116980.015157	110735.679152	262896.435875	126876.789635	137338.328531	184647.888982	141204.233203	65010.3078947	82401.8764485	193631.483073	97370.3406642	106850.0894	137119.779625	115175.057789	101100.014991	84427.5582174	103267.315747	87330.5552545	139646.090497	151662.345223	140371.942128	107260.7659	179109.944456	150322.204557	132408.501069	106119.045587	145012.171988	228106.071945	99110.8579293	138334.444689	119429.053759	144868.670887	112374.497428
TARBP1	178047.592223	328493.551759	140900.837641	151539.135283	289016.940482	108114.52947	115617.344998	98335.889319	100058.928745	193763.848589	228811.073365	149248.422529	218858.409619	78171.662528	266128.693547	78454.732741	144053.217867	126439.730841	142477.803099	193862.180913	177413.539191	160934.44754	106596.755731	44269.4562564	69699.81131	147274.428908	107177.29948	193443.550766	79605.003854	93855.0792165	91625.9989294	74980.0140772	182332.831992	75498.8148394	109993.028263	423119.955631	210275.543094	138848.303291	170009.960436	115469.438182	301844.273724	169749.51788	162047.590965	156289.034762	85266.2117714	110817.713108	81832.5185744	213367.902475	100770.52142
ARID4B	223038.261735	145340.738537	148418.474785	152945.153208	166891.721712	161566.832463	163962.117211	129598.864943	54723.3604388	227473.022436	240543.518701	219333.503288	174513.589869	173138.707598	185079.266328	129625.172334	131788.131196	121747.919314	112975.465189	102068.01084	305272.715205	180118.360917	167869.304145	112842.479902	36536.5279449	235107.524565	159448.00556	138225.678835	129589.125225	180310.597619	180115.438143	103231.130902	118742.115265	111106.12822	175500.542606	289587.525816	103935.343133	149420.11226	127763.993598	207397.994583	183461.975731	203180.212606	169754.18407	435207.553236	110348.411304	109765.563407	90220.6996032	168327.49026	142768.175856
AHCTF1	253807.971474	269118.847254	172575.169188	163590.261446	264300.287957	160714.309238	178890.95276	145429.040767	69681.9794552	197078.822721	260008.704142	188246.125752	149406.58409	148970.750473	273711.983857	124064.83211	117847.44257	168234.915631	121725.861156	100343.663429	262577.856626	250528.170905	160341.962919	106085.771242	45232.4164391	256381.18125	140495.405351	112486.824135	165356.037985	176217.350396	239526.190035	180882.330096	107101.725292	120725.852801	216013.379654	259691.947429	122742.110755	130406.116288	140247.723926	218242.000067	244034.527022	193774.96883	142674.75832	303014.355934	140631.634548	154406.614187	136860.10588	159776.990855	150603.51691
ZNF695	6112.4130885	79669.409612	12691.1350069	7314.97430835	36052.5051719	7863.64882292	4213.3586716	24312.6538803	7513.20548316	24120.2372964	12415.0651428	8623.90735768	11013.3453055	1968.07982902	28625.3459797	5606.05049818	6462.80606638	9402.55195157	26853.0476336	2886.61735329	13005.8427145	10711.68114	2739.25822713	1742.6829558	623.818838019	12304.2900757	216.720131523	2050.96336313	6901.00263287	8803.85378074	6866.75995211	25967.9983578	3129.4309156	7284.28677363	21142.9803237	3439.37006791	6565.31207002	1333.02116401	11205.4625853	10961.365385	12204.3989295	1119.48839644	8996.62162029	4240.37658313	865.893752585	4035.80270648	656.411936825	4056.48575281	1036.96467995
ZNF670	24536.3185739905	71718.91793095	27545.295158275	20299.9030816015	62982.70219398	14136.64914055	28213.287070998	41378.648062165	11273.3930019615	52345.73192626	46943.01406777	49185.54260342	16067.582391205	28361.9145990495	45108.92411902	30028.41629635	23140.953807325	23035.03122828	32026.424448905	33666.618008944	52442.190427435	45613.58487202	24293.3485955705	19166.1997605595	11884.327011608	42645.668978315	14644.548104158	22062.125032698	26955.668469235	15343.4150630495	22405.639460921	33237.434510915	18552.356553275	25597.8982528765	47183.656829075	27049.245660255	15852.242211095	28475.827906047	27545.22422887	29422.561049775	26953.538822085	32615.229387381	18410.37539029	67492.903663045	24392.89789542	25639.97290144	13801.724419769	17366.213431455	26422.971056584
ZNF124	25079.8451449	76967.1243179	35992.0214424	24249.2450953	59075.421164	12050.1172785	26820.0078467	37728.1395685	12040.4837412	49135.172386	37592.9091463	28161.1050507	35323.2352105	21370.8726509	56393.0265975	26493.2737579	20510.7173088	25101.3725101	12289.5990354	18540.2135266	51115.1616347	34031.0141709	28535.3043404	16626.3442862	7348.55000465	31949.3650895	18201.0365761	18972.8867855	28691.7931028	10013.2722137	17044.4327269	42386.3552267	20600.7589717	19887.3768762	18600.1080908	22084.9639945	24351.0096762	22068.0504107	44558.5489762	28442.8893367	21368.5341938	25133.8404382	18003.5301717	36826.9086647	21816.3819176	20847.0852063	10588.9693942	20800.6028352	13125.5501264
MYT1L	57.5436619008	14890.0643259	120.66412254	56.0100777253	169.148699713	32.2560146984	41.7171922703	663.685652911	39.2235786738	95.8579997934	22.4200468759	0	26.5740001165	0	71.6800326632	53.6562588772	185.56914292	182.692722655	0	200.06628053	33.4925541447	0	0	237.023785554	29.853267533	21.674724932	0	36.806333575	79.2605026804	58.1123183848	794.557744414	0	49.9203361915	174.297206647	87.9836050471	0	74.4128048364	69.5919479611	31.8561328619	66.9655491659	49.3563101188	151.267385279	0	112.736697884	0	0	0	77.6503350282	231.581643989
SOX11	2201.465805	5116.83800378	26683.9372446	4075.51205369	76029.9562596	1935.73083276	13018.2519961	207330.776672	1883.09166696	842465.253522	9384.58316991	7507.46792311	102980.644792	4288.95160705	19536.5426639	751626.382199	2134.4530736	1279.09351495	13989.0227421	1415.02484746	58413.8051544	10438.1223651	7801.28846474	6716.95764807	179.153844523	1821.0249229	2100.58703005	3534.08344623	69564.386031	217.962850325	2119.22567158	151817.888258	1760.02822187	58418.1586439	20724.099714	987.748898961	3609.71091128	3393.25597162	42249.3067308	3147.9824434	259.170159918	5049.51403108	5749.50872577	6697.83992464	3319.81221687	8482.04884996	282.771330968	1048.4799051	8139.99632236
ID2	672676.547724	553692.641366	548899.22191	912262.820078	691184.760219	375249.959337	391519.954958	909071.023908	870729.684041	1536121.24055	449291.821722	1021412.36081	764278.945262	578195.549699	443521.681215	1444976.42304	626031.067159	739640.873166	821574.394678	1004268.73557	423015.500468	574317.777425	356175.622578	1018504.03412	867801.316888	382665.115947	523470.818255	532776.101935	541913.672329	188059.513683	219621.419286	795508.501427	695357.18404	699194.406445	835651.960875	555267.709787	558579.477649	572208.856233	888792.506967	986416.904159	436275.981891	650041.531989	647348.925955	322496.397664	716390.304394	580590.527437	646504.492658	373360.788365	490264.98695
TAF1B	73439.1993812	77915.4849931	56083.1758551	79594.6962349	105840.570128	71430.9445497	94061.1874402	69942.020913	89890.6364257	143163.922691	96411.8065783	66668.4378497	62782.7361503	79604.68144	99824.8988215	81603.6243408	65304.8742125	66710.1208074	56561.7823964	55748.8263308	109636.82935	75307.2919853	77989.0992477	75783.4174354	40453.9762511	95578.7635987	62492.1884764	76650.3398678	105619.573603	103157.537178	103057.082257	146412.40094	59532.3409241	47911.0340346	46161.1482855	66311.404714	74489.5430414	48047.8031962	99255.7459644	91031.9909551	112556.294034	76381.1662424	86620.0209935	88976.0295964	124521.99878	87144.9549514	52901.1166504	50487.2772061	84763.0170864
GRHL1	78708.9870802	110154.944903	174275.865913	72234.8561559	534404.5688	113550.50132	88491.3848713	164734.38703	97429.1103212	302599.294829	98398.1460432	94366.2820449	171752.685226	66383.7356129	171210.101679	371636.733897	125309.355882	19968.4565171	53487.4611233	125719.265589	172557.800252	64063.6270453	159969.534268	106400.178697	155231.889236	136593.590463	127648.266481	114008.557847	144790.463882	73416.5540564	133608.890374	511519.640355	81297.5149074	116350.175838	163041.260077	19043.1184939	138566.636679	91010.331447	107216.902834	156277.470649	3450.61247966	184137.225032	118002.855604	179999.032686	184209.574873	218640.737396	19160.8229257	106658.232789	142094.58852
KLF11	120479.230127	191473.626079	130152.398174	182887.556224	393635.762185	76499.2051254	82289.4298811	224779.092181	87097.875315	376462.455196	107494.290045	98818.8155363	128168.168757	128677.046694	159577.668811	182390.269215	139118.343668	69782.8872687	79225.3836085	39024.2225345	79002.1951154	70924.3186126	67696.7070441	70716.8995129	117348.90111	98916.2889549	121683.277055	120969.184543	323423.120246	104193.765949	122639.949053	166098.11051	199573.677185	169719.27855	36365.7578895	59037.8976972	65402.0017113	126859.334819	179160.814107	192858.597568	104955.306151	413456.842538	116198.368093	130085.443449	106661.732115	266559.815853	399828.420849	110339.594727	264144.814542
E2F6	66351.9099865	59664.3864882	56274.6671028	62511.8603082	151571.151135	79470.5559515	76682.8205994	66411.7194548	92473.6421734	46016.0647709	85163.4383552	55253.3341519	101113.338629	101356.950928	49260.8319939	83959.5315058	64062.9822676	63527.0008035	70169.4621347	66830.8588411	70398.050615	49531.0649834	81093.8078975	74033.3883381	81808.4644443	103246.520972	62746.3130537	59428.2645798	80685.8372647	101212.333101	90297.7333494	80194.6064242	63984.1788079	51127.2034732	61832.9500787	93526.2848234	82492.3606809	62225.8105276	95698.8465907	121334.319252	110806.40892	72858.2783029	77699.6449464	81368.2425333	51499.3662639	72284.8647127	60621.66793	47203.2510802	80444.1859803
MYCN	3182.17334918	35337.344087	14922.6832125	5913.15309808	71600.2285425	40864.3789101	3670.17500443	14458.3315827	9267.84424816	147583.604606	3381.36010589	3890.20417412	1051259.97897	16042.9161376	75074.182301	120441.319654	27831.7936573	49392.1298335	10216.4750877	3161.05601973	26350.9491814	21967.222345	5162.34022282	3839.55658153	9004.85609377	3704.81191869	5631.05866718	8696.69159348	7371.60751649	3505.76742564	3402.69631135	11701.6464911	10038.5536929	5958.445799	20346.6651539	965.367642683	4987.92672337	15043.9230073	7046.59617775	3815.42350163	3101.60401933	13973.5354547	31967.1834029	1586.92716605	16373.9776498	10768.7207148	17245.1171683	39037.0496735	6652.72753929
NCOA1	254513.483613	144446.613805	331441.782817	302640.272223	281314.402074	123899.021564	231890.415739	207496.62087	144481.212896	210463.095064	241707.777726	213280.252333	104570.235709	167172.517997	161614.502816	357727.452617	227709.219825	144870.130234	64573.9338486	238143.52764	432305.340482	164977.508677	335453.524525	209062.925716	105532.400386	197841.666959	328174.427561	192630.075913	270340.754854	348120.140236	284218.906838	174790.522988	184336.88121	230507.133124	279696.119765	304971.157686	115984.925117	184639.384572	289085.675082	259420.772773	178739.191876	368705.247502	184870.79841	130474.057622	298105.243187	329945.007569	291756.941108	223374.266849	286133.865408
DNMT3A	70231.7114181	172228.368026	121256.354501	66074.2033418	337233.423146	100605.881899	74341.7632731	86217.5045877	80505.4684812	128417.110459	94399.9412471	65573.264298	238384.882413	67756.7680347	184747.044762	152229.176441	94074.6912659	77185.9257407	72396.9303181	62673.9961546	119643.602393	57802.2939939	80222.5879607	84864.1578766	50421.9999763	97772.0244164	55293.8156932	78388.0500882	77760.4976672	142863.376698	71705.46763	114375.237074	90508.418546	56297.7193354	60083.048657	77679.2126158	82222.9012645	80241.018421	174172.330416	94399.4478871	137908.049036	64345.7211021	118505.300919	75575.7559845	47593.9293524	63628.4495982	47217.4909011	77110.3518852	52312.8263814
PREB	444135.604731	666700.674538	499445.143985	463234.408297	1038653.46821	548614.904562	370437.354113	493146.363645	605155.14448	440681.694094	338984.447484	345685.885973	839951.449446	708201.649417	602585.616281	634980.1615	503799.108127	649613.70243	766082.823845	1272493.26705	454574.358511	346729.168081	713114.555549	452739.002783	621107.036911	501211.789973	387162.138171	361583.535587	461106.956052	810317.97812	478406.984814	672435.292022	555796.711093	535133.874781	376967.954731	427133.24382	709269.010696	382955.674506	859941.590081	724767.764397	572568.080843	307698.143744	647094.880618	465991.481119	393587.502375	427973.463649	634856.192137	616667.946464	452913.291524
GTF3C2	243647.39375	343456.190514	332657.669186	251521.263687	618885.781639	292735.519853	226122.182147	234315.328408	281365.609126	333075.455764	276500.747676	209646.316465	431913.540851	206281.683112	391662.927081	277553.553546	241052.372716	226424.457225	200051.392051	279871.796179	304295.229776	243872.81434	313058.887326	264614.926503	206257.007635	288868.398715	157669.964144	219911.552184	250989.2412	225745.844939	201868.872619	326836.601519	210754.139569	239204.79984	265110.242867	205815.776781	308905.445593	204236.217739	490289.126245	280140.406752	294010.941016	207861.396818	280455.370488	201190.783745	199348.702335	240805.512928	161297.241935	211881.526218	189142.547055
ZNF513	129380.208329	279511.464571	115060.225585	130269.26898	216491.983177	235858.734534	102218.286805	131472.505659	103267.572572	221225.155249	98957.612381	116131.94315	435510.253801	116383.640376	127134.029597	192905.02729	301247.650245	124065.439186	173232.589546	237440.933702	94014.3429764	96909.0017434	151900.845122	152949.661535	303161.711634	84758.411553	188614.142103	224343.738581	138752.346789	132426.596853	103521.037782	184604.155285	227517.346386	101996.647029	155482.822524	153550.543373	254221.127106	217863.875494	177608.352879	140625.37859	203789.731448	92033.8914805	244624.502174	86050.6582719	107951.505021	122169.014714	90696.4234335	182748.027835	111986.92388
ZNF512	187754.279112	239375.796992	285032.093386	204990.395813	10665.7216435	156668.834894	161551.790563	123046.283827	115146.326832	45902.8826155	188715.978152	165559.706695	72558.005205	167584.500777	137797.224313	224303.969462	152243.314437	104329.757383	186309.719999	209885.612341	169747.575195	144665.191877	244076.752391	168255.557633	97316.8734628	191790.144062	174812.134794	190483.572106	124826.992617	253129.813161	155887.517484	57496.7251801	167038.178135	165373.847541	166173.28249	148741.937349	207161.594011	200157.186523	291071.702416	111007.462098	194657.853041	192507.623538	153328.986761	168461.499204	102419.992146	188209.323025	128936.14006	129566.257898	182825.817032
SUPT7L	155182.04896	200759.545404	165124.781072	137797.857409	314078.185838	193207.458396	156906.198309	157046.91239	178211.757124	198633.538246	161912.565806	148717.324988	236828.334962	156437.192893	152771.563154	200555.321424	190131.152965	165402.151298	172601.411061	169011.135739	208453.808728	134161.640788	222112.27264	180264.364699	128282.251553	187344.69496	153631.345946	173214.460451	186699.405462	274699.725708	115723.832542	208893.989678	203011.785308	154518.259051	188386.487887	158974.175872	181269.938318	166239.807309	292458.416952	188043.142839	256233.223553	196605.645461	208922.947301	150609.734705	174591.189752	162575.697416	203963.126142	180036.755432	179494.69919
FOSL2	689466.621239	424339.351066	698230.79322	408766.610606	631607.035064	223734.221431	520121.591718	687609.594097	465840.078922	354652.020973	787753.248056	894229.425737	198359.312522	281421.261823	466574.229595	538985.449624	538204.104028	193334.669473	434354.98885	578743.796601	1156995.02061	556877.404936	439575.482214	592106.416652	700267.283139	239791.727831	389883.301718	672111.68396	1425554.79911	353211.701265	573146.759254	701879.534102	1230559.98132	1049613.51171	304814.39298	143997.651314	445237.832078	739319.034066	616244.155771	458978.805001	804218.316767	667824.380988	526881.023624	642261.72394	343133.913008	670890.28675	648528.536771	484809.503288	618150.723474
EIF2AK2	401704.948223	201224.305953	315916.337598	153408.501057	199307.860962	252230.659994	216114.060114	267688.70005	225693.814038	242142.821118	164816.394897	387521.448508	195611.951308	161266.765812	507030.771963	255999.594787	150120.052304	201823.408937	182649.902527	107747.880078	804116.001556	136399.485036	303178.11838	161309.592972	113016.736183	442864.389708	196857.538995	125056.074866	233529.77507	419919.407286	337622.005709	456119.916633	137761.411825	178785.512895	211548.461556	347928.548271	126279.595517	155432.907102	477280.877054	546483.896474	424675.925864	245661.933434	215969.228909	230511.527819	202100.326585	140457.111861	172925.458534	523316.464249	169111.616373
CEBPZ	434442.033413	413037.16195	463127.08339	387532.624248	619952.161618	535768.475467	347060.232168	328454.509449	349926.14791	374724.334018	367706.993935	335736.805031	486507.033003	454121.030024	535527.324532	498122.226197	291862.387776	326557.455161	316277.678875	363152.431997	490813.173785	312411.212061	407312.375437	294377.873872	148176.656382	331966.533336	350699.992475	304082.304944	483119.32233	449522.978825	394601.396767	380825.357906	266403.478144	288877.270134	303981.985618	391372.955461	345922.751846	312558.283277	532112.009578	447442.314208	372718.276421	355983.047219	329891.945039	438064.48805	299508.855216	377072.713264	333305.614481	297949.716892	374923.452383
MTA3	161929.148172	69474.2991375	102969.449761	132371.885707	206373.09738	170451.373103	86910.1009137	84063.2388964	229578.253013	172413.793103	109410.479317	133688.496555	190990.837664	90706.0046594	81564.0203706	168901.717577	102901.922155	97906.1486366	122821.616013	159759.113929	248334.806833	104247.748249	346790.954585	124905.998956	108885.278655	112660.475522	124677.534885	122277.204744	103925.655672	120886.708497	129528.989297	86335.5883831	81903.7341036	77838.3186923	268365.188782	145198.306257	117794.769066	119771.504879	74598.1928253	148203.938002	190942.904929	98726.0297735	149164.991924	150230.726407	57022.7865207	84358.4718396	102161.422505	153513.677502	99518.4216452
ZFP36L2	1242939.09578	1332057.9493	3550818.73904	1771902.42672	655768.24621	479820.812099	904927.269184	1922909.61985	692440.789927	1163504.72934	997267.512408	1132643.54091	896499.288782	2030853.15598	730295.38571	1454268.95734	1762229.20736	1010048.32484	1164752.63074	558473.523237	502837.797471	1363699.42488	1041732.39355	872064.518607	2509051.68898	413400.275181	1295001.295	2837847.83664	2934252.54545	502253.35288	821244.325238	2625132.57611	2284379.29442	1365274.79209	1920680.38421	510299.783647	2002182.05977	2905871.24907	2121658.59629	2094427.2167	221847.933897	3227279.15172	876088.88203	965662.907117	4131191.46349	4376728.76809	1870458.60123	1851891.54844	3143246.81413
SIX3	1044.21333517	7116.24976225	170415.446771	1742.37295297	151367.678449	2006.85340438	11463.4313835	764.669223211	406.725035777	19382.806705	581.206169608	2808.4097831	4960.01658299	4998.04451508	203039.057393	1112.76658323	5772.72285025	315.735698909	0	592.733597329	34556.1252686	2529.44827674	4191.22070662	2048.16233243	2166.92362124	337.130888033	2742.37293659	8969.00179399	0	4368.77722294	7781.36114544	3272.69088264	1423.52102555	3795.45120595	13456.9755687	0	514.410833698	4329.76110002	25765.6645021	4745.0165536	255.897698242	882.310642166	2502.04615863	350.703625451	257.811885431	4551.60251911	977.203026046	402.593750497	4116.62236795
SIX2	2218.92796762	77724.2344163	21474.9304346	80244.5714983	8629.77488078	2257431.80535	36875.1411433	17936.4350242	50959.3267784	130794.219464	67566.6801168	69930.4043282	430852.796494	97220.4658941	92843.3049523	90400.5516344	265861.376411	44436.2556494	557762.849732	62226.342386	131136.792066	26677.3376017	11924.3658214	90929.4903906	27096.6533641	13244.1219565	22518.8433805	43015.1197054	126955.914559	506433.410815	16061.3438588	153765.544406	13178.6178406	139590.720009	135186.669498	3905.75176873	240000.824037	23325.9742981	5102.57233428	287887.011631	82570.3536196	5272.12286514	5725.77093717	17388.8559504	3834.90795023	9166.12242815	38687.4013248	5297.53123528	5887.89015552
EPAS1	528878.977584	496010.901063	230427.591685	537259.638208	166417.237771	271932.896253	416152.408113	902452.836337	304112.018903	229979.504907	318539.712104	549227.570753	632865.941318	904257.959279	363698.638375	532079.296781	673621.232444	155785.602356	361163.595652	228303.4359	443156.055911	365475.409866	523841.808228	417062.173945	442011.784146	154072.232386	563903.467218	741712.488793	2207083.31186	201128.882701	1042292.11904	448710.004675	811028.321804	1070423.64696	291274.749044	130719.927469	540596.648781	834533.58312	384523.757653	571987.843099	256589.6944	2547694.45389	535895.379064	649421.177827	748402.429388	1545942.25857	4666590.49397	701575.599553	1778867.3229
BCL11A	8826.51155295	42666.8337334	113870.958527	12682.3628028	196635.88184	2984.31975573	4943.08093093	40696.6467958	5284.27118854	67410.3720173	1310.0829873	3014.46172311	27303.6326675	36474.1275619	105760.103624	8752.78458846	10843.4642644	6425.00011697	6597.16296768	139.173613295	3153.08770871	1962.49662072	5106.66529401	4488.47188895	244559.742009	3095.96510256	909.046696365	29572.466373	9134.29347623	1792.17986091	3534.70529496	1664.92412613	12437.8602023	17936.5732216	642.649326131	1558.43566588	3542.9814785	19598.2937172	87902.6089766	9202.87846111	280.395163708	23509.5259771	4469.45146054	1573.70582047	42454.6020017	39385.6903864	2447.43341329	6049.84657652	19653.8197138
PAPOLG	64417.1375796	43008.4459116	69441.7554074	50505.0401671	71004.1869956	68495.2924377	78154.6766106	61275.1819249	58786.4319708	59148.4903675	75483.9752273	57591.1604118	54057.9182547	76265.3029483	58531.6723354	84297.9591039	48780.8435771	56911.2390201	29523.2709135	38569.7106675	84056.8592343	55944.3225391	69759.6258114	75700.2340031	26321.911488	59000.0469265	71192.7544065	42307.1810578	69091.9843602	84100.3748033	48633.6552298	52146.5285277	48931.4249604	63402.8570872	49483.4605341	42591.5200853	44236.5027713	60449.6608795	69802.9814525	47846.7260186	53770.8462541	94967.8033252	57396.9738516	63561.1438862	70050.0610217	58033.1088072	49767.900609	41341.8933356	70353.3958743
REL	61997.285696	11214.9406212	18764.1855507	21514.5905582	50995.7615425	105607.071962	50182.3352119	25883.4587272	14086.4364712	23786.014993	68791.6758424	32017.2617409	10253.9326978	13908.3744302	30213.5169527	40472.5466033	15816.217707	10852.5555291	4584.87913807	4119.01135921	96148.0914166	20141.4983401	56219.6548128	32108.5249779	6488.27017469	65723.8688107	39343.9753724	24682.765505	49790.6696154	48223.8478072	46754.7416666	30445.620837	32432.8232791	15476.7309174	14725.148771	81428.6779513	14010.6452075	23658.1243313	26435.450272	21065.9794194	21281.980469	51687.8034694	21148.3347831	66090.0125268	35860.5108483	26160.9855631	18488.3860515	23284.048013	22724.2218144
OTX1	4672.43104485	34222.4644812	26976.2983989	11066.5738363	310492.13209	4277.90305922	8807.1181839	10046.1524234	14862.7578251	22247.7779789	16444.8515607	7121.01350872	9494.12650719	7917.44854283	25285.8669109	11690.6974035	8705.86646277	15054.0533918	32516.8687323	8586.63470582	453.25481147	803.760127665	23594.5749508	12260.3259967	50985.3473889	12260.9474568	12884.5566462	1992.40078417	6221.2688664	12347.0159504	5575.50091445	20287.9917806	4256.10374678	10661.615514	2381.36465471	519.736521056	9130.39315876	8758.6283084	12588.3862609	7733.29006316	16564.8886179	1228.26112156	10756.5967327	5492.39756061	807.522516377	2566.18841469	1326.35141946	8511.82150143	2507.19593215
SERTAD2	232333.282424	149848.954335	269592.182954	202085.061228	251945.462271	281316.369613	260456.871534	253329.465656	144258.770794	256569.631549	195533.337043	320147.268819	219461.430789	174444.818277	204098.275437	485183.744745	107945.960859	134671.390802	127610.055573	227633.225548	222514.656534	153196.409472	321190.179297	210302.59221	189715.697521	296767.981125	140575.371688	199599.450484	308364.86802	31623.1509089	178853.190276	203908.000889	194788.702266	292610.983945	328085.569339	250914.124998	125824.426674	161419.294198	205233.364449	151627.401119	191301.557294	305963.364347	130445.98678	37843.1794627	242185.707347	257348.941296	250635.193991	109442.614914	248454.136915
MEIS1	28260.0244434	12887.6931587	18824.2475999	20873.059084	18253.1186678	17481.1816816	13126.0089372	21408.7800701	17456.2933363	19954.437368	16495.8047749	29099.8704932	24289.1416298	29985.5244284	21667.460902	25516.3997753	30415.0269178	13453.9676625	21309.1756881	19011.3311124	16207.9717176	26341.0754102	19499.1560734	22527.7251313	42536.8680983	8997.97838504	37037.2603773	33421.5209408	31481.598958	6500.42405708	9259.32494557	12413.0622512	58199.7636564	72065.2731211	22209.8734624	4299.26501111	20297.5863558	43418.5366263	39788.3041175	11456.431119	472.383312723	39225.3007624	26863.4050531	14970.9777481	10261.9575862	27559.1831357	35356.481727	20158.8124249	80306.3737633
C1D	76933.4495183	66394.4242054	93708.296695	84192.3514931	69326.3196353	86839.001434	96080.8389587	80004.2381594	79663.3621177	108199.054746	73626.2756863	76697.0247278	104643.51471	75770.4106771	87454.3237719	77714.168562	98177.2611916	66068.2901423	130346.527444	86863.1969117	90840.8837809	76244.0566053	77494.5153277	68399.9282234	52344.340812	114329.265275	87969.3702927	97072.5369827	69776.7101845	65487.7387742	95780.2639499	80269.9751635	70479.6314435	65578.9224504	71992.3575613	101108.77192	128390.501386	62536.0901242	58183.4786325	81946.9636397	110429.57533	83989.5999325	114375.982578	69267.2468341	78741.7325438	70165.653797	77110.8970366	77577.7695866	101271.381834
MXD1	68564.5597554	38036.0448065	61535.769014	45568.2241467	286029.385879	81518.1103743	48504.0329449	89916.7207129	118515.775322	55578.3430052	113921.18628	78787.5274244	74054.8594622	58607.2069166	69931.0180458	62385.4292834	67970.0773042	67815.4146361	107227.331422	72289.1399592	402554.952925	45305.5973952	170325.561223	74205.2018742	54662.8746373	68258.9986588	128745.680627	62845.7511307	135008.516393	67686.123824	65643.0860851	205011.107714	72847.757787	79553.4495431	82907.0923416	67123.7665213	64422.9101969	59413.1202087	109508.599189	51722.741417	170073.816789	108618.214687	53557.094406	99196.2802509	78094.0454327	74785.946925	77252.5844289	76128.8237241	74954.4826128
ZNF638	257396.506299	172764.137218	278910.178155	282253.907433	308498.741216	294147.692179	261039.551626	211939.225873	172632.035126	277542.806278	257281.240736	223641.893823	271342.179166	236691.906076	250334.72968	216150.59341	224956.63236	232411.190103	178886.548446	178930.920122	421538.355091	208936.252221	376524.812078	267475.650015	113045.835328	285027.2201	274661.650323	222282.279737	259534.128551	362532.859682	290887.019787	189893.106936	190526.079569	195171.117804	266830.363219	268598.516259	221277.908927	218460.770729	244734.487885	242577.705653	315698.214711	308234.499017	269375.749014	361193.69551	218227.716398	211114.359024	210694.655139	204712.241279	258184.974547
EMX1	48853.6717901	98.6348152491	57.2301445593	11090.9651072	240.678115404	33963.3379536	38434.6368792	291.464293292	4185.7801792	738.80259422	6592.87572785	58110.9239667	126.038613316	236.491954031	283.311127407	254.487861629	6821.0957863	336.97172942	39688.3669428	2575.58651697	39.7132071036	2313.92240835	6269.27283274	92745.4392508	8707.90480235	10896.9797479	5460.12148623	436.424627896	939.81747241	4616.67919372	14794.9754867	0	16337.0363752	82.6679390916	1147.57513722	16914.185166	80116.1766913	7096.49885152	151.091397377	6669.87067491	2223.88831773	224.203302533	2356.17440214	1176.34490176	58.9611482	416.377561846	89.3938808816	1104.87023115	235.366167384
TCF7L1	143673.285074	334034.600561	457430.613816	108887.651638	763744.761473	346901.592363	102860.11704	131123.274818	54284.1088444	53335.5680771	29500.4134875	292310.211919	61112.1088643	222734.558774	642587.377545	118384.190169	124561.143092	43854.5727025	79886.5504704	14060.234468	29776.8079361	126036.770301	138559.881113	288775.112362	74138.621794	24922.6338496	57444.778786	168086.878992	218800.494116	16016.2104716	52064.853272	112355.235219	204157.436895	194113.535447	123461.15996	18535.5086487	183990.706227	198812.938268	376587.332363	78786.2733143	121841.798955	285277.176111	104232.372741	387420.086255	319040.455988	381714.422249	328321.487396	133468.857918	289225.596505
POLR1A	140284.030758	134779.882197	131419.14008	122752.616875	209921.188636	126029.844541	111954.000973	118827.640222	93895.1776856	202640.611924	126170.345336	128210.451829	184233.882716	64746.8402967	160979.180662	196716.763982	87354.4400344	85892.3714571	149906.299887	92478.0161275	131331.126441	99481.8079442	173202.614863	103205.019785	77212.4279917	138816.903734	72193.7255705	103458.236688	135937.551708	133460.828207	91460.5092236	172504.340737	78347.4252935	98188.1337937	66616.6020555	107182.464004	138147.675833	115045.690175	158527.991006	78683.8730204	124909.015775	98907.1600423	109650.246204	131991.832345	86798.4861338	93133.5244909	74115.8655661	113077.503434	71513.1056769
SMYD1	5645.46480994	1301.03609784	617.637673153	796.378072526	3174.64898483	91.7262887544	4567.29343377	18733.398574	334.619760412	3475.53495979	701.313688049	0	16625.0410903	661.69763254	13657.0252145	686.619315364	2902.36190694	0	509.909236156	0	571.455783609	180.95835545	8325.36004076	1273.15551595	0	3205.08869467	0	7117.28873166	16679.0632677	0	334.73783751	112.187487729	38470.6838483	8723.4084736	0	0	8605.36636289	10983.3567513	5254.17049783	1333.00748706	0	45435.4816161	80.7245838648	0	1272.63793097	165365.181442	7610.83955064	441.627840219	113552.441566
ZNF514	36183.5652479	70035.0910145	77240.7196254	68932.933646	72812.6485249	60940.8297986	52183.361037	40635.3844999	28918.8485147	46932.2202115	102795.332459	52050.2428464	66737.085006	28401.4814915	48536.1321341	33275.5672576	59619.8365469	92525.6212955	54166.7857303	23651.336389	68678.7018375	65488.1727871	44926.9710198	62498.6228876	33072.745036	63047.6326738	60037.4884831	81692.6433019	61328.7940895	57852.1521028	37404.3616169	37494.6293204	84681.1236322	29783.9977474	36742.0658201	83692.684518	64292.8599779	77631.4471764	30459.6531389	35057.9115019	87420.1638019	128335.642104	62570.1427379	61040.3443559	30455.9730566	31351.3419487	63256.4904488	81999.0045321	57485.3564391
ZNF2	39463.6262156	39484.5334998	40842.6736262	36761.7365511	24031.1115408	53428.9563825	40558.9764389	37336.3717415	47636.1430697	51305.223719	54750.8429318	45933.744795	49149.69719	53319.9793989	49666.7944707	48741.4946092	47787.2430942	87049.3435549	44415.0170499	66708.4506696	44458.4781934	60896.0792091	46917.4518903	53451.0912601	30099.4150452	53143.5887262	43796.3400926	32290.354871	31783.9872013	37856.1762066	30826.7077587	32415.3336668	35379.4329796	49867.4689281	34849.9844975	33315.8133463	41897.8355383	38272.2276213	52975.1545482	33393.4927701	63173.4955034	50941.3692693	45347.9844494	47090.2992655	39229.4074707	47934.9353947	34057.7263654	25419.0198324	40828.4515176
KCNIP3	12720.8271024	12028.9857076	17047.6020191	5771.97017241	18724.4515612	8524.60071092	9915.56171137	8988.50696814	4824.4204339	26169.7729165	4807.20275486	7245.53410894	9805.64396524	6022.42136424	9173.92389575	26130.8912395	14239.6886597	7490.27782183	39142.7149347	2707.80213995	9324.58028951	9272.48701499	28615.9087748	5296.64668642	27042.9825879	3098.26284725	15980.066806	15722.5105362	17126.4120233	34772.580082	4402.20663053	3213.09526483	24228.5021569	10834.9832058	8189.47371115	28816.7060294	10884.2011697	21572.6770767	21709.1652257	5008.75929971	16202.274943	14551.3242176	31612.8548248	36577.2740824	47317.407754	17918.6470079	9586.24993421	13035.5968593	13417.207376
EIF5B	503744.760536	405274.252372	889698.767368	446497.049294	456111.947106	726875.27666	480734.701351	428615.772555	1165519.2959	337776.978912	571671.793164	495821.614649	596540.516993	804625.568275	668076.605668	664882.709415	337801.682673	854201.405055	407246.043757	663550.581095	531736.114942	681090.245619	918513.279577	564932.537115	331114.14448	451132.833281	645841.442492	257314.011838	666236.71349	901583.607813	491208.561923	639595.341055	282972.858929	813481.758035	1273188.06353	405955.034426	637075.1738	326578.67096	717176.908981	569167.938314	497510.945451	458222.653977	451459.633908	577835.896439	426928.436894	633868.396032	512425.184797	335402.983205	471737.415682
AFF3	269456.405756	11575.9498067	134035.128344	219995.925517	1841.4007925	327097.803701	142755.832365	33121.217851	533225.095796	22396.6756442	310292.526403	213328.550903	27400.8756777	79202.7404353	7778.75331197	88003.3291378	83474.4697995	330952.959816	14671.0165719	461426.143018	108849.682098	187717.240716	288331.463517	115383.595651	51170.7764033	11998.2016499	85637.2058382	113854.794086	118804.999969	261525.699272	98949.6295838	3930.12931027	156804.955354	8377.41590444	74049.9053215	697171.861041	144031.014916	277452.294662	39521.5332771	257123.622159	717786.142347	232388.375952	335123.955485	618713.087199	10622.2464068	109670.757279	55167.0504745	159694.388403	88780.8501031
NPAS2	13287.7003772	16028.9510733	21077.443931	28741.2725238	25791.3322329	37225.1143186	48449.6176947	30478.5361859	5257.76198678	20378.3087459	10166.4223976	19313.7793923	156845.352396	14237.8847154	7906.92755574	17362.9136509	99596.3376629	7716.65530143	25726.106847	192036.574587	24026.061086	16304.7471871	61135.7582432	11638.7304156	16882.2127935	4267.3197058	154152.503844	17730.6283538	84124.8519048	4229.57513066	36488.5949526	75853.8664933	35549.2261669	38878.8819879	38882.8366725	14967.2669678	8857.77279434	37642.0317121	54311.4242588	18607.4553283	27756.244685	28435.0168678	26249.8690851	101013.593967	72903.9421759	29272.3392905	8368.94477239	9310.91919956	20544.9232546
FHL2	408854.569896	164386.873092	238071.286223	140485.130373	38068.2601974	120863.851774	156356.228656	134760.948538	129935.75846	27061.6276528	492718.907426	286793.726846	67781.1542737	69956.0284361	69292.822174	27541.2248441	220298.00006	40234.8109982	1228840.72907	251256.940634	70087.9968024	718464.207694	182709.267889	288557.201773	156652.151393	57338.7085663	704603.330622	219659.615518	498217.978815	209831.855734	415855.939787	307565.739451	318176.284691	309824.264539	131748.855763	66179.2383436	483856.782702	322586.805458	79996.2592944	148640.115905	59194.108028	207399.19395	103172.986857	1256907.66173	118930.206351	520631.063081	88409.1181057	138580.230212	321010.419319
POLR1B	134513.523991	220155.214154	200461.977821	106097.339737	112991.523835	112402.023236	133343.191446	91194.5675472	121846.215808	70036.3703725	145827.392105	126348.963442	178448.332432	107384.909339	169286.997783	103302.087548	86104.9179476	124312.912088	67574.3203253	50447.4918477	153364.863525	116178.561802	122238.839339	98739.8705052	48991.2167047	138336.484953	90866.1044543	84440.6147794	115164.333196	172115.602832	112522.475794	128179.832718	66961.9432139	82135.5413672	80376.6445929	226678.16292	164872.532923	98095.5299435	166183.635122	106388.658554	143631.993817	118023.395754	100680.609132	181792.978807	110585.28999	104440.097653	68016.0171877	73344.1338054	84719.4736685
EN1	29733.5637945	1022157.17014	1270820.30641	49123.778403	612269.447318	3947.4723019	32428.2725374	22840.0549944	14933.8271452	14555.186969	14328.4841577	32151.023294	11683.5086853	14464.1953534	1516609.11155	14956.8494892	18223.9486376	2116.17311989	24111.4392795	263364.87688	5920.4878482	18940.2242676	20399.8489223	33184.7717947	9742.46800665	6582.22943451	11000.011	27026.0260631	20657.0968624	1316.99105473	4935.2373479	10550.133115	46611.0987701	72523.3283373	70586.1733052	6962.95663551	10230.8668175	13405.7940157	8374.63073113	6374.04827492	447.421963038	8313.26579533	21616.0632054	10219.7418228	13523.0641776	21487.1597508	22040.7025141	6511.17969554	68527.8192581
GLI2	25917.6078231	14398.8184741	12276.0282863	19538.468239	4720.44550728	6153.06781706	18457.8043907	14457.7308917	11916.0660023	7111.06897144	10414.7656667	28884.4420718	8918.00623139	9746.38926368	12534.0270348	15068.6640639	35070.8892199	4589.29469568	3483.85192405	201.926392933	17510.4463714	11127.2529128	22034.7667714	17350.6396583	17822.3845934	7005.86754806	4506.35071213	30684.6938376	20929.3264943	4413.60939536	13982.0618463	4738.35351901	44174.583686	50549.9601696	15307.1811309	7558.62641443	8630.77677166	52547.5352379	47151.369428	16164.834951	523.059594381	18635.7446005	26172.8153897	6531.2512607	14316.0788646	15567.9556148	16312.2709291	11109.2717571	21094.5629816
TFCP2L1	22087.1080201	186697.392785	281627.489592	21263.9403403	562932.655321	161401.859566	19535.1280031	37156.5846408	96353.7338276	1237.59561262	58611.5166404	43490.3684855	4005.80084471	10856.8278103	102382.087683	16588.334529	81846.7634332	14477.9910736	38959.5611435	25211.6693169	16384.9438027	25698.1975261	107066.746831	22643.2519268	90710.7938636	4961.42131894	3865.02733921	89285.5124649	19249.2909291	199977.840622	74508.8137889	444313.685131	87025.9164782	27392.8666445	3499.89712145	65933.0031093	20945.486895	78677.8851618	199862.546146	22650.2633895	75537.0441001	119078.421692	23376.709412	69172.2113009	70792.6349425	362694.534154	6103.20220288	5039.70310621	95122.2202782
BIN1	40086.1406623	119744.003809	138910.784321	51865.142013	13347.9733138	19486.3756742	33195.7919707	93646.2112961	37986.9971916	75327.4027519	18242.4922647	60820.5453653	293182.149206	118356.060055	32973.4736524	101295.644736	84896.4054386	80016.5122197	50664.6719756	14568.3379217	23110.3239761	18780.9475176	65829.1705801	54889.4499009	135824.870568	65552.0821318	111603.517578	124378.688497	92323.5234727	97036.7904377	54945.0251828	85278.0340412	170108.138474	39946.5703105	30811.7276993	33610.5891896	31374.1238776	87696.1742068	236891.467939	76443.0219094	6615.63319081	98093.9958229	86924.8470388	36777.2652821	187280.484478	123571.101413	328565.048194	97850.9368879	162948.570942
ERCC3	152101.835306	223773.542351	212544.359118	133347.326388	133457.624715	184260.651286	139467.16024	123647.147709	159519.718779	227199.662504	183629.768704	146115.424005	330470.962101	118974.529448	183407.592715	152732.569893	161260.15353	201419.581098	178430.339116	97141.6965085	194432.148759	109173.236181	190492.011944	155935.418113	203407.422574	184995.575468	158543.733736	152291.096266	134626.56084	221702.605137	156923.34335	153333.510793	157891.861743	117125.937739	126738.891118	269045.858246	113547.277448	147232.499489	190309.424403	139348.21706	159422.865673	149119.837039	183182.961245	148487.0905	136182.518588	155474.402676	147909.006379	140881.130842	147995.591649
POLR2D	166504.842972	216857.45542	222897.943277	150080.541238	132097.560653	206772.046938	162530.823686	144343.826256	220313.752703	284147.144672	209940.276453	158052.162056	346483.71741	178391.742692	275588.410861	167276.780351	123090.114621	254965.216403	256131.982177	101228.741651	209417.148817	159919.263072	163788.527628	157022.800245	153409.538195	205673.775026	121492.658806	95260.8904664	181828.029371	188441.763349	144300.447232	207767.964264	130888.977002	169449.849912	228927.405732	222816.468135	135410.900373	130818.893175	240648.871647	162702.074706	164248.936528	142933.423599	166410.655739	187202.790174	126146.304758	152588.529034	113697.179404	96695.8775681	117920.041186
MCM6	308366.492937	382883.394699	446001.659896	348453.117688	315829.613416	556269.378237	292066.176047	273132.307539	389111.263893	1586200.80661	377385.351929	250804.555368	504539.057734	257434.490023	628588.989249	323242.040111	206117.373037	709229.095893	575668.29355	75717.5428786	440563.082388	263184.988457	299745.670761	180532.528293	218868.00576	344322.222257	156059.65096	167775.701074	334859.841015	347040.894893	371674.426476	423953.19246	209872.74869	250255.404465	244548.165473	260024.617813	176572.42432	163033.037899	489973.331264	341768.334178	276564.14052	141389.244831	224531.176199	327959.754418	164589.286351	225323.556819	174822.997702	168715.133131	187375.1697
NMI	178340.449647	202619.038685	540196.321222	152849.667299	158063.461908	97482.9041176	177902.181242	266197.287208	94360.2083002	74136.1294274	80398.2494419	199731.429098	250222.503244	209543.016295	164447.390307	155401.330744	123696.622408	448050.005799	175694.013822	83582.8463934	266583.575682	68888.973937	156366.515228	118496.431743	132077.864221	152680.960342	69353.804986	127836.900038	168779.01122	98625.1458079	150550.266201	454668.808029	121500.754806	151474.650272	115256.714903	84760.7056793	124937.531234	96265.0217904	518612.451249	316576.509905	80610.9736674	111303.487509	144478.447742	66616.1536545	153269.165889	145988.099198	116047.745358	364704.646153	131071.540936
NR4A2	186521.869025	62951.3398486	37162.4023042	202051.576112	166435.60062	81048.3961033	61283.2126985	292687.987796	255054.429935	30265.3632278	144235.621715	202003.942904	40658.7158869	588505.567716	18436.2055878	116507.776275	43241.336964	156361.677948	16555.6616125	201871.062964	104365.947876	37420.2598743	350202.690343	33260.3595545	194812.317307	62394.53947	180056.89798	160932.896201	518795.354573	134614.944252	186409.400992	19773.5042653	267244.35453	141270.359628	68903.9488744	41248.1649485	151067.854249	74923.9945986	55988.522668	189091.945185	23110.5230044	500667.733636	235324.269636	660812.267495	32547.564484	245132.124131	223739.340685	75150.2075976	121198.960994
BAZ2B	63152.3440365	19230.7384123	44105.5220741	39654.7019619	44252.6828189	66677.8521405	47591.5883575	44892.9530376	23299.0849379	38165.4132098	50045.6346072	50387.9411818	31365.5102	29138.0842606	25562.4133711	63968.3662388	39603.1364532	46628.0867155	14662.2894743	23823.2203258	123562.935636	30130.7062409	93090.6270576	52004.9229636	17215.4399683	56900.2793375	68812.4399465	45357.3266264	59246.0934607	28940.0928882	48340.6134807	43701.9005957	51788.6249916	39063.01592	33787.250638	25243.9407166	12838.414064	49896.2189928	42673.4027635	39577.3310193	16529.012716	114041.603086	49018.8840283	35112.1129767	79447.3713653	68011.4257391	50786.2918648	43681.4812211	57998.7530268
TBR1	0	56.6739209285	4439.27077579	0	92.193089206	43.9521800281	0	33.4941050375	0	0	0	70.2938282019	0	90.5895568359	455.800385477	36.5561209569	0	276.597627899	0	0	1369.1128149	0	29.7704105935	35.8855108661	81.3563734583	29.5340705037	127.187627188	0	0	79.1840871658	0	161.269513611	68.0216580959	0	0	0	0	47.4131391291	0	152.079227194	0	25.7646961827	154.722119074	0	33.8780930699	191.394885929	0	0	45.0791590032
SSB	483613.062146	363280.609052	775960.259697	464276.111595	410849.765972	468318.94542	401512.44894	464549.414738	770779.460639	469636.987775	445679.530577	477046.666056	595492.932975	473099.664083	487436.811327	366862.444463	264122.863341	669209.378404	560438.08673	617212.78195	552165.099421	482003.502204	523297.791155	446106.099642	192696.699615	460475.033453	584431.251359	374398.488244	575891.031683	456353.086903	514218.334583	966822.246591	307091.245484	455104.514845	930094.804899	454148.200082	364126.357557	352346.482468	524534.722481	509687.001213	753655.782195	428505.244739	454343.787332	553080.674644	330636.406545	488186.102939	617600.416003	340501.71557	432082.813305
DLX1	1235.33146826	744.07773648	172.692274283	114429.247555	726.247529851	1500.33699877	298.524393921	1055.39411934	9262.4506985	428.719398009	1925.2295395	19196.213916	3042.57764135	594.679804174	5642.29298683	3551.62313017	4094.40684107	72.6295740653	7057.27772141	613.566821415	419.421868896	2656.29971075	1641.60688612	848.060213029	213.62723884	77.5511698129	968963.769839	1580.29644254	1134.36174569	415.846409624	947.630366036	0	8305.48910668	498.901916881	25498.9049637	98.1512428205	2041.21623828	35855.5380372	341.939338594	798.665525746	6534.00055486	338.267345944	4164.29335801	704600.994476	88.957793619	5905.18138204	539.493049172	277.829330554	8285.88480584
DLX2	3421.4938242	732.753725137	0	148383.736624	0	2273.08244186	1469.90597195	866.110190869	15893.4997314	2005.42520292	4443.58535128	22039.6002766	1872.67068296	1610.48101042	3893.70603467	1417.93438863	6947.19011701	32364.7163796	7634.33132471	8434.03030523	147.513838642	560.544400722	57159.1883395	0	920.395336094	0	844011.955123	192261.241852	1920.01228808	511.897129153	777.673763912	521.275195511	8904.65342347	153.534125262	5037.66868319	0	2184.94702596	103600.1036	0	786.510750742	2717.29752805	666.238608361	11627.6016759	447477.279803	109.504947297	5722.5137611	0	74727.2966674	2914.20825879
SP3	268560.414912	160720.123745	329601.662117	322903.631593	166402.324688	202416.542103	294926.148657	242028.703397	230178.214116	270809.611501	260041.902611	279378.564732	198683.247722	234882.877859	214322.538719	266581.004036	170234.562363	210859.178219	148571.087979	223782.142443	492021.080654	236694.114993	309185.071455	232917.885326	87084.1540112	305088.272701	255097.695307	239337.451323	240313.645631	240854.557509	430765.441923	296359.850573	188813.481441	225271.740427	311329.42341	146231.707459	108367.065045	251651.08284	248725.771914	358825.139823	288555.064135	336558.564934	295324.977506	371349.958084	199804.789262	221777.751229	196289.687278	202361.187343	271081.400105
ATF2	275777.994657	125634.582357	311070.584657	212118.228394	130734.321178	207632.207791	227399.80211	200943.663649	156485.60105	362537.467928	271603.433897	244242.634787	190459.620135	216999.084502	140269.26536	180320.646723	138022.882358	191658.925973	193459.912944	183780.422116	288801.623719	184931.405068	333055.886152	219843.213152	55612.6196034	309656.332743	291503.160569	174468.830733	224361.999297	195824.68463	320020.664459	240757.352819	186273.602681	244371.545288	255758.563916	191806.131298	100256.242996	207282.230784	229983.963618	143685.91356	180857.199979	294822.313753	207587.527521	345355.196974	246735.724676	167812.480057	311582.892539	192251.326618	249903.619488
HOXD13	1680.1978601	36919.0113477	3805.08923639	8667.72205723	197.556619727	376.73297167	2436.1722861	430.638493339	8245.98695302	979.623824451	392.781205157	301.259263722	310.37008529	194.120478934	139.530730248	470.007269446	361.22469621	118.541840528	0	667.619136635	0	743.221817029	1020.69979178	768.975232846	1220.34560187	759.447527239	908.48305134	1504.57390467	1388.58031549	0	2062.22417752	230.385019444	4372.8208776	610.709400039	6165.60823725	160.196849889	289.700565496	812.796670785	372.062566041	521.414493237	0	220.840252995	994.642194048	1185.03381296	0	3075.98923814	5503.31079177	906.914314736	6182.2846633
HOXD11	1605.34544358	773.558731157	3889.91393939	347.235936836	1258.37012755	0	1034.50728358	304.780481858	0	1188.54833678	694.968325081	3677.93300165	329.492412819	1648.64406753	148.127410311	498.965063298	2492.62160039	503.381464991	1852.75077908	354.376034612	103.818981224	2367.038204	1489.93144961	1306.16456612	2405.98943308	940.61115538	578.673564456	2738.18189286	0	0	1641.96048257	2690.37292849	7272.83699831	216.11201518	6545.47983481	0	922.648246507	215.718547696	2172.42218655	0	152.99286556	1875.57219605	703.948977778	419.3484583	154.137295484	0	1635.86565336	3610.46457051	5332.58677119
HOXD10	19433.3731694	12126.3664394	6566.92523544	9934.01771004	1643.85894572	6896.50848584	10541.0604712	19827.7138885	2096.55273364	1280.93456986	3486.20069164	5640.21801323	9684.65347858	35858.9271041	9056.02124403	5735.99758254	28103.603408	7693.77057097	5518.33422982	8332.83914968	4556.92823977	21748.1649084	10510.3262363	7038.46572709	15376.717242	4739.49422645	1209.51086776	14129.1338447	20605.1838791	4518.08164512	39610.2296206	23771.0783807	44997.3880896	42008.579236	14108.5240496	11197.1171156	20128.3780722	17584.4272312	20587.8305488	17463.1243352	719.498394499	55036.1474476	23173.8329906	7340.67503095	1812.20111518	14162.6527775	9158.55584961	40939.1632714	59962.6495389
HOXD9	145111.591015	95430.396909	25997.2981379	68956.971927	12542.2042214	26850.7863445	45961.5819539	58978.2829238	20029.4680118	122877.307093	29484.4957426	49980.03956	67292.2178502	149283.838687	39611.8043177	38471.8962798	228463.996097	37061.123875	45991.8134572	47383.107922	23311.5251477	67957.7652875	46002.4483695	60425.827067	210290.998261	25017.0950149	19152.9603294	138259.882235	100908.453301	25203.4057118	102927.40993	78375.2588074	289663.137834	123874.944829	70470.3743623	38378.7105617	107402.998955	121945.579655	65069.16663	61989.7701265	12256.6102618	246150.671723	129668.719258	32175.4635278	27827.1395483	75165.9915647	145292.113618	143399.15753	212445.782066
HOXD8	81314.1628514	38699.5142073	22574.4076642	228941.277921	11277.7852753	20222.3495481	432991.862721	73995.3450201	212922.876836	72497.3797205	38932.5009438	109218.801612	117149.655015	296061.419678	26511.369484	60469.8588122	86331.1909938	39289.6988066	185576.704889	25739.7777441	40412.0024481	90027.1833544	235681.096082	269546.732665	129080.907177	34510.713042	50004.2341047	81861.6399102	132509.330372	20963.1512619	69551.3669607	31996.2640926	132265.772608	130086.445044	308413.308198	32894.8906216	578334.451085	151144.935874	38516.7546496	70193.6163737	1473.48016584	191268.323491	85029.4855984	30402.8961507	31793.0890917	83692.4917701	262209.628157	124021.998643	198025.938188
HOXD3	3076.2585398	2453.52712926	444.872431496	8156.81486911	1371.98283824	3329.86076425	1538.05691118	1721.90664003	2169.18108497	2032.13961329	1074.57616443	3043.16009352	3135.1927443	6985.71103447	352.366218439	2274.96942144	13569.3425904	1571.64830283	2864.76628355	1580.60900443	1667.01447586	2893.56558603	8377.33312755	4563.56891285	7154.22449802	1678.14786177	1835.40206088	4478.10046035	6282.79105541	2249.64937608	2278.44384889	872.709881999	5797.56183997	6683.14833865	6001.09933652	1618.2229707	10425.3010717	6029.54012826	1526.84074452	2551.22762193	181.970093761	9341.51780424	3035.13514306	1080.67720887	1374.98461163	5437.5999159	14036.854944	10020.0228686	11099.5358808
HOXD4	2827.87399405	17095.0843457	1940.66482002	7757.07056982	0	5476.00931498	2236.48603314	4831.93646443	4205.60354616	428.250852219	2403.90682938	3457.07351813	27543.2250552	11583.5826774	1494.42749337	3835.39629712	30674.4905962	544.126481112	1602.17382945	0	4488.89447507	3790.56664423	17959.8542597	4706.29650703	5868.32857732	4647.98486616	5560.11484973	14799.0875869	6373.8112842	3375.05945297	2103.54378763	1057.50500729	24086.3576209	1868.83750832	4323.78719734	1960.87947405	26373.8329025	9327.17491065	1423.19014333	2193.92983493	661.506037566	26018.1194238	9131.14145356	1410.24060316	1777.21143973	3765.14529696	28629.2452118	19426.7984359	11232.8396205
HOXD1	1715.07791694	12947.4800623	959.032336373	6677.47892711	448.128433609	7691.07514821	2763.05109918	3418.94256991	6234.94034591	5237.88738542	2969.8899563	3929.33601696	13904.579821	5944.50965364	633.010300264	6752.23945573	11061.7061401	3898.97618263	6729.94131095	567.898809897	1552.81655968	1123.92700094	6077.68584876	3837.47842781	7315.89464617	1579.13814947	1442.5330881	4388.02313463	5512.1365435	11354.3967015	2338.92767475	1306.48719888	4298.27996475	3694.14766201	1165.48206341	181.691617089	2792.86013521	5070.20505522	1054.96221257	1774.1293137	1471.05545164	5259.91164601	4136.36855044	298.675188865	1317.38610014	3721.29803527	7989.41402642	9000.26357915	3286.78425137
NFE2L2	497538.650362	264618.584342	703960.718855	427113.85015	225963.272531	524620.983569	576460.540496	507456.69866	492144.946169	592774.81635	388926.312848	436731.710149	348254.027127	575918.675832	338633.777893	418496.967262	340221.82727	474532.167241	303773.658678	496988.23597	498568.648539	354320.031319	503715.944742	535102.843013	499584.466097	383252.355743	753144.757159	363493.37913	713920.876168	455477.358389	577905.645411	774395.759087	483940.137719	519754.99901	612800.342367	303085.259399	258204.168841	425248.040422	584188.633548	478937.394832	1277545.95419	577377.40431	414062.164723	357541.02639	531986.352592	583269.432602	543404.215873	319978.907045	666112.995976
NEUROD1	0	0	0	0	0	0	0	0	0	16279.7389184	0	0	0	131.289212806	94.3686098296	0	122.153278912	0	0	0	0	0	0	0	0	0	0	0	0	0	0	0	0	0	0	0	0	0	0	0	0	0	0	178.104920896	0	0	0	0	0
PMS1	71846.3460883	44839.807043	73125.9222587	67174.6658313	58889.8587439	81708.4580259	57795.5939123	67873.5168161	44923.0713593	114850.464235	75687.7654657	83980.9965126	94687.9426135	54832.6216267	65515.9270251	72532.4972642	78641.9580912	59316.1785291	76492.625135	82074.9987064	84076.7957694	54088.2132921	84248.9505078	56152.1297782	28170.0923076	67915.3515548	82251.7342341	66457.537522	74315.8941239	64044.9268883	69316.169491	69528.2367052	73235.6530337	50387.2621001	57144.2936722	83716.3802328	50980.4930528	67756.9265792	83678.5647795	41429.8652409	34485.7376588	99245.1556923	55004.7357237	89327.0715598	50444.032853	61549.897237	57926.1846629	60500.9064882	69584.7458798
NAB1	226881.376851	203177.224201	324983.32571	171960.302282	269391.715544	174923.740674	233992.179603	211730.445693	129557.029398	308091.392107	190956.874727	205746.453571	126256.543801	145210.221492	283385.285704	128397.484142	152987.196077	75633.9148995	78074.0913528	157977.239534	95566.1476197	147904.233911	257023.360704	134078.313895	136243.208591	165927.448281	85197.7524783	175167.253694	325659.542785	161148.61005	184479.111472	234324.24028	277464.894853	224592.432849	81602.5252272	334316.107408	83722.0999919	246722.957501	212490.588157	183129.903047	41350.9630456	440830.946596	171951.457564	557715.715685	242441.533316	274931.880339	478163.497005	166380.826278	381399.018444
STAT1	1852100.44929	1351320.49917	4650369.39961	1079029.79371	744758.103215	846461.042786	1705444.56212	1748222.95872	1588838.52801	1254384.5975	818393.459626	2056793.00023	1104349.37204	1675025.30057	2610064.19127	3211150.54139	715035.125733	4994560.79196	958047.54122	564475.123449	3123015.77033	573549.993922	1254612.54961	1293315.47161	981792.532328	3384525.43596	658408.720527	473111.810209	908169.301462	3217681.2915	2467346.35126	6898424.00387	431041.324179	920053.435872	498545.398256	2509870.97896	248186.230371	385233.126199	5230183.00667	3804532.33462	716133.999562	540489.097889	1188842.53582	717693.213462	737018.950164	522334.445669	740418.870653	4136224.48128	539001.666176
GTF3C3	116696.776695	84769.189654	175191.001456	109925.954017	129114.442623	158977.60239	92473.7397429	122281.532637	121897.983376	187602.44342	166348.322552	94598.3768804	134887.14485	82069.9309558	119168.866441	108171.131175	85640.5033458	92049.1990449	82532.810919	89717.4879182	173797.3582	110636.316986	184711.465767	116611.495408	75299.0164478	140706.048265	81915.6343435	93446.63936	113603.654579	105867.062745	119846.039558	137640.862848	94941.1933858	87155.9529987	108449.910406	175910.345825	62929.2420497	103653.59711	131552.525814	98426.6176397	484290.571844	145619.669482	119997.292744	163058.577071	91320.6528465	126716.614132	132209.586548	77413.8485012	128457.520738
SATB2	9239.09493139	7199.31537986	2938.44777274	6886.72989164	22009.2280857	18829.0850451	10134.1921418	9360.49892926	15357.8601481	4205.28424003	19751.6111781	10253.4819308	2157.12590762	6229.99544	21990.7968943	5124.12865393	9488.49393658	16162.7115437	6706.96458337	1364.72610519	11174.7992484	14103.8966458	15909.4291326	7796.69869229	14753.7310948	54878.7123534	12591.0876048	12917.5317532	14003.2288797	6659.61441249	11206.2945511	9089.25457257	14868.1762613	25675.2828255	10660.4968122	6320.15898376	3849.27927871	23260.9085561	3004.20659275	78926.8706171	66902.0572294	12166.1657171	12707.6024062	19998.3317677	10091.0837543	7964.59828285	27899.2444885	7693.62609033	13980.380905
BZW1	486922.794574	230817.423418	356718.117184	528001.124602	170497.349389	637112.535847	451512.367318	476926.22796	965371.455733	955560.337558	506750.100876	408857.07452	573209.208946	588916.154273	285836.251277	618407.48678	310697.023552	436677.350417	371057.513915	538164.606903	672970.173831	537196.01048	1623221.97189	416042.897926	192043.304413	394728.605673	486185.520199	271370.420624	563479.079364	346329.748513	401565.338255	506168.85311	328725.074227	547139.222144	916246.751378	682663.272213	199855.766742	376180.595961	349809.681139	502363.677987	269990.682387	364877.810904	440639.409394	1465807.59638	299806.667339	405430.47302	391183.907667	260751.606612	368903.08138
KLF7	110893.784397	134460.74369	119190.037403	79065.1579368	66125.7968272	75805.4097	114419.610649	111092.518544	63373.7503489	102078.875562	151229.669627	84334.3790736	59261.8536421	50187.1230875	206588.638792	61003.1748553	62769.3235876	47390.1148521	30220.9216908	5530.09502944	110877.147506	77351.1329215	72451.8323371	106861.487594	23990.5557319	75611.3020713	28519.0308943	135310.934964	189405.83323	15799.2002896	60223.5365509	33208.0777758	145026.699066	192107.294927	42497.5631469	32854.3641008	38710.1511398	138682.664087	95696.6451442	85277.3347393	1289.58680785	199939.828446	75774.0803412	35187.9326981	68824.2495361	132765.478635	165998.20181	32516.5305158	160871.564101
CREB1	152786.226049	101597.547567	151658.986526	179474.922985	95484.1177064	122329.818995	161545.064989	140572.397639	122282.699704	180688.672991	170299.538434	155120.675966	104955.979798	134331.776896	131352.116457	150711.246579	107237.897907	120245.871748	67121.6293735	82855.8926837	207847.768954	119594.416416	138017.799938	164820.74597	45841.6612096	163276.062838	139974.134752	116154.676797	145586.059688	60059.1660191	163547.83827	80629.7039749	116757.133696	145585.46717	148206.411685	161187.979016	57810.6177027	128967.699842	169121.18511	147780.030827	74239.0090677	223239.858208	129413.943315	165136.576127	140179.942032	129528.862749	188638.435274	105075.139864	170708.537037
BARD1	71525.9702858	52281.6219965	73209.7970474	77408.9462552	42596.9453869	88741.8204174	122776.337267	62114.5334759	82878.1869094	131240.851247	154686.867676	111506.148445	55691.6580929	43432.8173602	120650.959838	68602.8301907	36609.5007756	56984.4910274	64822.1521135	10167.7943341	147097.823844	48524.0014072	53089.1752585	69558.8606866	28707.3882149	82716.8165484	34816.7481841	25077.058388	42552.3079372	59640.61393	97395.0828522	33854.104588	41492.4266164	42991.579588	157546.347947	112732.955133	39201.0180071	34435.6776427	71363.4031401	115410.762268	68053.4558033	38729.8548189	49943.5961752	65677.6500585	20745.6554101	48380.2863129	13085.3074267	43696.9165129	27390.7716745
XRCC5	1788953.37995	1287422.34086	2221905.26947	2442159.0318	1159577.43832	1961951.94214	1397320.28362	1538087.56128	2342452.65998	2510878.25365	1713276.67425	1577484.60503	1993995.13935	1612762.74628	1426579.75829	1443776.06767	1312950.93461	1795985.91558	1532521.64644	2322791.54773	2472593.18338	1663445.52182	2054612.81608	1820500.93477	1043649.0302	1346844.43913	1123330.06347	1131699.56492	1451965.79999	1276407.47997	1580734.02804	760632.398958	867091.238358	1692854.1123	2017100.79918	1330923.52229	956229.287391	1377162.9244	1762036.00743	1314258.49269	894580.902896	1287097.25748	1481797.7796	1990411.39677	1397422.03823	1627602.77075	1094235.88704	993060.383965	1393339.62035
ZNF142	120324.652702	145469.006078	115142.043011	101194.898572	87252.573073	134473.309853	82510.7936992	85282.1021601	95221.9838657	121062.119524	92671.0550954	120414.111656	131660.108471	76036.1644909	147336.790318	106676.552228	110947.73283	76994.9084649	58019.1264131	85528.5596833	127945.687134	93785.7945148	112863.65327	105606.225172	88610.2817352	103900.471537	81237.1415746	104429.561951	80866.1738203	101460.697104	84596.2059895	83083.5446731	93273.5072638	93820.2388576	71006.4614646	104101.840845	64994.9887518	128011.408179	153838.348725	89760.230177	192932.009675	124130.283468	125352.790323	89907.8937486	74122.9813258	96677.1308277	90455.1040932	105001.849514	99558.2959147
ANKZF1	84142.2439396	260876.013473	131864.987123	82678.073926	181957.427639	145703.739408	89449.2073645	98423.0762965	72363.3232491	110401.795938	117329.824814	101019.089341	280977.495484	113912.777597	154614.369314	101112.1157	200533.721856	119032.358489	222585.645321	211281.435808	91539.7017209	66794.0090898	129610.024221	134332.269602	187884.161565	116765.522737	154046.89371	169169.283611	70487.262689	76215.4926903	66433.3436627	106855.877755	157782.677946	64833.6045539	86990.9317126	130247.709768	141843.91146	119835.372531	156359.916625	108751.435341	157899.18849	166901.67236	132840.026927	77940.9720772	95086.7660761	111627.728208	96862.5869628	155208.476939	106934.631274
PAX3	243.70666134	1056.90195731	204.412784841	1739.55236218	286.548777157	91.0729394064	1060.07410507	1596.2655714	0	541.298724497	1202.7317139	2694.62203511	150.060218228	2252.51822739	134.922873195	681.728653286	2095.77376087	745.076278044	168.759082403	161.392927484	520.103292514	0	4379.77808343	2528.17413052	20482.2089363	856.762157501	7906.33210232	1454.88691839	1342.72389669	0	747.795514403	0	1409.47100738	3051.13035029	0	1161.79886818	1400.66753013	0	179.88779364	1134.4394759	0	4751.42594831	881.645573831	127.322145048	3509.92546375	1586.35087841	2235.05926739	109.620551749	653.857000867
SP110	28617.94251795	17792.22642175	27291.6178923	15048.2394127	4608.98298842	23048.4847926	20309.83427215	25807.78120995	32885.18548555	15799.5556946	19758.2582444	29317.5948882	20684.7081459	37275.6562491	26906.9718764	29087.27678295	17915.4820926	49122.7717311	22892.0650522	9530.46983105	78385.448036	14186.7133144	23563.07399865	31037.69982795	21815.12196095	33288.1025389	18378.75108085	22056.85619315	22842.97212365	27433.5663387	45840.55491465	26836.7505243	15861.4814683	18100.36502955	39649.0971081	16648.3380313	9050.9799399	13790.90403685	47285.8190269	46935.65917565	13119.50036805	19780.0808101	23772.89019655	13254.11938355	15396.8900769	14954.7293244	13108.54159755	79713.342682	12008.85156375
SP140	10990.2157413	60040.6482986	39530.8765129	20869.613839	5866.53265603	7105.41871325	23071.625176	53744.1777141	17464.3300251	19711.8143967	8826.67043622	24057.5652807	54116.2659639	103215.618323	31411.6619238	32880.8620746	10291.8623585	99087.5572477	14567.0953408	2277.22471543	17620.398535	4076.04751439	11059.104874	28327.824271	10773.6709531	17269.6535514	17717.8607849	45455.2746836	12073.16935	24308.4650246	7792.75922329	55193.3498393	13336.2419599	9639.47859897	5154.57514162	27064.1414044	2383.20493865	5626.38182715	119817.210447	20976.1445004	3527.7161817	7444.16015827	17362.5824773	6763.26475682	25344.8435435	6254.10734385	4946.86711372	28750.905972	8605.58076564
SP100	184781.816968	122197.920617	281581.473135	97056.1319044	59024.619737	81659.5139353	150113.623168	167015.018101	135285.24693	41464.3756667	78281.4788845	206195.229392	93281.2396454	206215.086298	158627.575224	86608.2820046	109944.224227	193983.97976	100691.381103	74607.4173551	326573.227592	80307.3811191	154064.35215	143064.252545	112250.905006	179490.750496	151504.272601	128665.036146	146219.48074	128019.922189	212517.938065	188380.378429	106919.825488	153588.880657	124869.284594	108693.143685	46851.6850509	91949.4753325	272093.382422	234047.254983	56284.1085695	149839.534091	126132.002349	110492.126133	133875.656038	122754.836967	133454.196331	318214.94377	133449.744313
PTMA	3377585.66634	5539105.68996	11916087.9757	8362455.41541	6810694.86996	5310485.06969	3526308.1798	3920773.53178	12902883.8095	8534199.71752	4758148.57361	4348778.24832	4425961.94568	5316432.37922	11432274.0074	6607996.10539	4371362.05133	7096148.99067	11660789.9803	5514368.05319	5683642.04436	3558886.94162	3968062.59963	5294483.25859	7227914.08559	3371269.55837	4483510.70021	3580476.12165	4977469.86646	6071998.95404	4095519.4238	5582426.80579	4036741.071	5036073.38814	11784427.8979	3005107.00349	5302278.47557	4410988.34112	6904335.74003	7082407.94609	4386862.08152	2789726.25097	4361899.59848	5489251.87039	4613775.05649	5335667.875	3072876.70657	3109475.73716	3533821.73199
LRRFIP1	335442.09304	272469.125271	346185.947518	269556.010361	147508.94273	294518.384265	443999.512577	283474.787036	330760.241119	307948.095297	369793.223894	307301.15609	175632.800738	427376.272774	245369.613685	541786.224626	321964.388668	346124.24515	208391.105694	499117.249979	352893.113348	328458.953962	466528.674847	405869.017679	154780.141609	378345.811884	663696.90771	350144.348069	453150.971757	345240.224759	462125.821963	208098.787213	321867.443522	335071.682925	272231.040114	189114.393682	203495.842649	242020.948351	282008.481281	361868.054955	219305.843298	441768.09241	268710.237351	636004.546232	373436.161775	316305.740395	215328.398804	321084.70299	367015.035498
PER2	122043.396114	100712.614931	92175.1354657	127313.952732	76060.3040453	68902.0884757	151165.251989	64243.2227842	144367.72272	121936.59935	115741.279986	123296.826131	69907.0593733	119503.920258	47811.7457052	167483.06154	158310.649469	99232.4658357	60938.9856365	124604.117239	151464.451007	98367.1060397	165692.659524	96832.9574001	158600.564946	140217.476853	183703.542726	179157.405708	295799.711935	92188.3779969	110217.190979	53054.5510533	220866.135905	153568.06039	125685.046787	97993.7897871	81906.442272	141441.039968	62291.3997437	191576.040185	156173.524276	276869.515728	160963.200335	93453.2602997	289003.730813	284412.188204	180402.961132	158631.538594	311307.744082
ASB1	56378.4609899	142368.560558	63306.7038327	52601.7926879	64736.7181858	58992.011024	56963.6916302	74679.6499039	54493.4978248	72299.1467093	62296.5479935	40343.5347607	66004.5337656	55923.4640742	61160.0285891	69714.1506702	104282.303662	53500.924172	70905.5974271	64531.1107184	76507.7239396	49689.8782429	86085.9030862	61043.1426944	76573.8044599	46680.5713549	32296.3885717	107013.580394	81503.3556296	71913.2568139	34442.7617017	38095.2977901	133685.966421	54276.488865	36577.616479	36997.9056716	42211.0535161	105591.172357	58541.8605936	38774.6615862	51101.47531	118630.257792	79829.0965782	47007.5850978	51088.7129825	128629.761393	152320.948023	45578.2578688	103897.423633
HDAC4	23565.0012264	50345.1635107	37358.4752566	32144.6499382	32275.8570829	26702.7248142	23492.8068332	29272.765408	18077.6773616	40967.1531135	26501.957876	20318.3237711	38953.2102256	22118.8145955	29856.7372277	43946.1016028	45214.6962653	13487.2380139	21640.3730286	26932.4991027	52257.3401161	24596.1498993	42544.4287835	22884.2611484	40108.5460532	15355.5957233	11204.0806236	47217.1487498	48357.9396524	26783.2711347	15607.5773579	22969.5656729	56420.1185643	28482.716483	19543.4899042	12992.1466768	13616.446687	48587.8273158	35723.350147	14831.1375605	15165.1545704	50659.776049	34472.1992408	29013.1956868	19901.0988375	47831.5406127	56288.560984	31191.1224823	41307.7248748
ING5	48376.5846315	115515.27376	74839.608786	60311.0711023	34916.4460778	75743.5422455	48081.7222906	40545.839542	45301.5304909	77452.4046181	46530.8414357	44069.0868317	68251.1387554	56633.9395321	28510.5523348	55208.658772	103560.477296	48152.2738754	84479.1090601	96339.0697558	57996.9545588	47948.0793698	60156.560411	65329.1349036	109962.068087	50343.3443748	43529.1898707	107859.600503	51208.1326101	53860.6298264	29105.8631884	46068.013254	92575.8176037	32197.7911982	42106.5928398	28400.9478652	49777.6230196	83761.6705707	59457.4129927	46968.0001567	58224.7933689	83703.8422326	69058.8970502	39673.2620917	33236.8881864	73551.654212	57848.6554096	62493.0322437	58633.6924713
BRPF1	112971.141714	141257.445569	88531.4495655	106616.077761	176380.512313	166557.656914	117918.389216	177767.653919	147920.222006	233006.30794	105594.581092	153026.724925	161335.776451	112577.827213	130737.517385	85796.4216228	140495.76353	146462.91337	140469.4277	100343.997312	101549.824708	120116.876609	87820.8088145	140454.723267	181672.629166	115647.158965	115256.094807	117706.742135	140840.631159	117279.772702	92494.4756778	159803.159443	160599.172023	109066.134957	87416.4746486	142959.820936	122747.986181	123410.93873	147602.253696	128856.115553	181889.159098	146950.499404	140614.354556	106624.915653	125115.750254	153898.681327	111187.576954	93933.6046126	117019.801177
VHL	303735.744185	187512.252221	162448.953947	209644.21199	212597.745135	369060.603056	317732.840824	316506.174809	153084.767676	592731.707426	426514.581419	277184.265168	247282.374338	256996.530573	216254.416384	227739.514143	271282.919252	236541.196678	215832.93232	284326.835916	329704.983974	202322.866725	177732.107108	334197.767846	154239.170683	316772.359522	281992.449094	301814.73969	224686.555487	305744.928256	283800.161833	283203.505697	244199.8515	168089.801733	153664.577477	441801.085981	203165.844479	294188.793579	276751.670296	234466.96633	542724.48727	309924.894143	296590.513563	250276.941061	285550.590114	213918.879388	151451.949002	200954.818678	185204.40241
PPARG	65580.0410447	84044.3711249	22314.6076454	61297.0982071	12031.1297827	13035.7429643	34662.7696902	139552.700218	53134.4641801	24638.2897618	21020.8165159	53705.4576712	29469.0489285	107579.016976	25260.3730331	75461.3747484	72694.9077217	25332.6784464	14493.2185264	15708.6855679	26258.8122679	12549.9047304	27477.6622146	69479.1739795	15828.9019245	39102.3501914	209535.800243	53429.8513651	184503.405241	17754.7711015	21026.599457	70024.2910312	140817.945678	61648.5428967	30010.2269449	24212.451222	19567.3184722	112272.813487	24409.3641943	49218.6414378	2792.51683678	374312.766529	171624.535444	30398.099193	16156.9867493	288823.681544	1805421.08942	26987.761615	392115.148368
XPC	310708.435628	200936.099145	152708.776369	289753.480869	163065.325602	311047.324571	224115.664383	263708.485181	134740.595481	268594.150384	201589.482335	329534.184864	204598.444219	208170.949948	177054.550976	173201.956334	254733.427286	220816.914111	110972.743725	289477.876585	344612.372716	182627.889256	188525.251245	280382.665975	258983.890299	247716.862463	284170.771874	320306.788076	231974.139908	275279.402652	248395.28901	182525.628744	285810.051524	136095.618196	88153.5483692	337974.619594	257042.532593	308598.465868	211655.366873	212147.669262	387135.723467	319666.956623	294481.532177	294941.749005	540241.904328	325315.459301	254770.02663	239752.004337	327320.919762
NR2C2	100419.005784	112164.598165	79981.898721	85222.7613354	129003.252681	72137.9423089	97867.3120062	101867.867719	43578.0363051	140629.595224	143822.404413	117826.751504	72516.4830356	64446.4882131	126489.605808	80958.4638994	93536.4475181	44274.3395318	15477.1537038	39376.0309671	108166.97742	72319.0476964	77414.6523404	89061.3961244	28509.4866267	101936.390877	70031.2010692	103493.708939	83498.8509479	88421.4491658	70730.7478667	71989.4230119	110924.617104	99793.804475	29597.9794803	120089.228786	47046.1366695	120712.785317	100467.279486	76919.3342261	102325.319677	180865.944041	88144.8810332	142468.267221	90297.2552214	116031.834068	140408.029237	76131.3943658	101371.477564
EAF1	178466.233575	114685.487196	90623.6228763	188144.319634	124804.247158	161667.58393	191716.166863	193225.61962	236225.616577	354915.886213	273637.572926	193853.787091	171040.905698	165171.20751	158883.035878	107011.800043	123130.505143	236980.601195	89234.1163273	138313.268959	256899.988435	179558.082462	155490.299802	183751.646944	95732.7015632	307411.151243	130268.56971	131206.320631	204060.933319	225895.970405	206072.981217	165276.209601	122755.855651	108069.011224	238470.535988	231310.321079	141449.450022	127043.653542	155538.329238	186065.628402	305082.681229	131784.020537	191865.037721	208955.237552	129978.249002	123485.365067	131792.329744	171426.521014	120873.744979
SATB1	31492.3385624	38992.536723	44660.1359242	17512.1215948	154252.397267	9408.63133364	39821.760486	65584.4001689	12129.7271642	57908.0489383	29242.363977	37870.2822679	89541.3876905	64953.7053653	67828.8546535	26590.6317671	33369.8453046	21426.466407	6705.4959586	2927.58634008	27445.5607908	24086.395168	39110.7131788	28415.0943525	43043.8254801	16112.136069	38244.5009188	45780.1590801	48442.0431934	9013.84075248	15043.1069344	25285.481797	67594.5253037	80697.9896611	23474.8939175	65190.2855529	51540.731527	113681.213234	28062.4354382	25891.4629113	2311.15182697	103112.585275	31209.8133844	14363.2606533	143562.872373	61559.2411092	80754.7346324	22043.516553	61707.5829171
NR1D2	208229.057136	137419.651571	321864.929008	164661.429099	292584.74826	201328.171444	271773.017726	143644.821604	131180.14525	73360.6954723	299021.22703	236998.902837	65461.4238995	248121.994435	405561.650795	155389.894773	212643.42048	151427.220948	104919.812246	79783.9281636	293394.759921	213918.479277	122862.791431	124659.605582	105276.824706	357185.657622	395112.078961	264225.927231	108134.300307	138515.009385	239369.18712	229479.313389	187262.923484	509901.075431	90669.0475943	334178.335934	96168.6413294	117701.8959	144344.932838	454795.280665	222531.540324	604328.213968	137112.508821	193283.132423	252919.173995	258718.53034	494028.61655	256641.16835	463469.522585
THRB	81504.5480272	26113.3436562	107547.013826	109450.091006	2388.19163221	106345.198938	73719.03773	104079.787366	103630.050499	91679.0219177	76004.7492361	72255.1785582	16285.0745406	27710.4810438	10838.1844527	79665.3956671	107449.104262	31678.6701081	26124.870958	48895.8766921	81571.3925127	131677.7304	86765.9283326	187143.619051	38696.8241375	105545.387886	81315.96144	89116.9368452	79763.5142757	1178.35086654	124293.859104	32827.9473797	98262.3580403	67229.2244811	40835.0307871	15945.7394915	61919.8783599	165990.084601	48135.3007704	55689.3908634	5597.09000989	225273.79414	81438.3044937	100786.157428	60684.148799	179487.921961	256768.089779	112724.377933	164179.446197
RARB	47541.8279008	24429.4185533	218680.082119	31609.5532493	65834.3942396	9701.10330077	34097.1865762	78102.7808243	25536.2154191	21452.6223499	38394.8851667	20352.3163936	31028.6133414	67864.9815019	116751.40443	65783.2192324	52418.1295707	31028.014131	7401.98242008	51878.1784075	41654.803738	27544.3058039	47387.858334	18636.7814074	9295.35627503	29986.2285753	312213.458007	66287.5297789	64642.6641864	16346.5770422	23428.0269017	50950.1736267	41331.8508917	140363.497054	20235.1582216	15432.9754007	12199.2383112	74486.2082937	124438.171939	52996.1346981	2008.31586844	87174.8530187	40176.6930785	14918.6115942	19617.5876776	69082.31966	53884.5132174	27062.6960242	96806.1831643
TOP2B	879760.940159	515623.90853	598875.549263	1119306.48214	1033319.18038	833549.749097	805823.235337	873551.086246	735074.648405	1056878.606	1052428.34168	980857.09716	516130.457121	792535.717885	923063.652918	814753.920742	719647.570157	757895.806043	402831.671211	645854.134206	1406733.96915	967516.4223	724514.463715	956098.307243	411703.093323	959601.238212	874875.792149	767123.584486	998209.432882	877701.366968	644425.7207	634831.943719	500182.024336	741409.02571	601259.016386	1183213.29716	393501.946144	758057.961838	608724.891305	765150.750592	923259.292239	878584.66554	889073.640684	1052450.14904	641365.439524	823086.676879	669319.141548	548205.995041	733343.343234
EOMES	8132.59883269	35864.5468983	28235.1868453	18036.13359	1936.6600796	2077.38969061	23732.6893167	32277.4701499	18665.2415591	18349.1902348	8583.31503028	15412.3448268	32612.6290932	52331.8227673	22227.2147966	45979.1210635	11508.6030127	143516.038353	855.427602596	920.350232123	15099.1872803	531.25994215	4221.27485002	28834.047243	5661.12182926	14502.068755	10464.4524776	19885.396902	16022.8596579	27445.8630352	5475.19767043	28654.4518714	8841.32711356	6111.54848179	0	15802.3500941	1774.97064199	3983.94867081	104291.498271	21803.5688529	176.594609591	5750.54488104	19805.7854832	4275.68728043	20015.5035643	2387.20098423	4315.94439337	15280.6131804	5918.48914703
UBP1	421558.888676	200960.149129	151662.955684	199381.736453	287869.142641	362497.406101	337318.005949	251831.743187	191039.541085	140294.979187	268516.392842	292502.990369	143818.374275	190594.487284	444933.762704	145121.807392	200296.13319	247822.405823	161018.46986	243166.589799	384496.256262	327448.099562	207319.187215	319792.847653	126235.749964	469185.022334	302039.338925	198899.737168	233493.953378	330587.073418	303304.719879	302129.180582	230125.075103	210337.661561	241326.286346	441602.313053	161367.964171	195870.673124	252673.178046	314100.945504	395481.384559	302181.872737	208190.025141	265387.135221	211365.978042	230521.020806	170562.938533	173852.500645	290649.72518
CTDSPL	356104.543567	150473.366871	110292.441634	328284.738786	248825.902876	198740.292301	289751.505719	223737.847812	191034.244172	177400.477251	335325.094567	265923.152982	154435.356448	185905.525333	263746.783244	248732.993608	252054.5658	221369.728862	172532.781228	449272.20161	200387.47121	194985.021627	364887.848268	316802.936508	484634.69506	265623.193102	238259.55503	276949.587201	182729.119777	299161.74381	242087.186056	183684.751735	219866.278715	300929.269584	356235.142597	355373.881493	181769.610853	260409.058968	131210.47015	147305.891616	167366.962341	359532.19932	192393.591544	479865.544015	237749.863912	361074.57569	255140.932398	300902.778435	303589.00291
CTNNB1	2220003.21167	1044870.3627	2934539.50322	2055767.99642	1850797.87139	1306268.89133	2176457.31428	1955221.16683	1026477.56683	1240600.11394	1780012.68308	2113431.66477	1099395.22488	890632.036134	1814805.78899	1050959.18398	1806136.58869	1265721.45119	957761.783295	1499762.88518	1619088.71984	1889762.64319	1897125.04147	2167897.20872	689563.533561	1359635.36377	957257.080632	1696114.7616	2045004.68162	1106805.3357	2466196.45406	2886173.23664	1386037.44374	2195801.00027	1371473.39685	2510475.98265	979869.456703	1780474.48764	1378847.89367	1619024.32384	1251481.40897	1967173.11879	1557589.02309	1298073.6879	5175154.80188	2333200.31186	1302523.66476	1391695.2559	2039088.35006
ZNF445	72552.9962944	37910.4065474	41484.0643977	69231.3883029	57784.9004927	74593.1980206	88227.2141999	59607.8067804	49881.1553026	57359.7315565	73773.1259151	91204.6343179	47961.2274113	44282.6466906	73710.8057341	58181.6964761	63446.8262272	58304.0500261	26950.7521608	42427.5323797	111300.356807	87720.4588726	77305.676125	81309.9814823	29231.4555037	71111.0328558	68679.6731525	65939.2966039	48769.483181	83526.3695172	57630.2182128	61235.0224125	74889.8277324	70120.8695847	63230.5792547	91923.7682358	44287.4284692	73820.9562931	46519.3391878	51269.2931156	125265.683361	95201.5166962	51576.8993554	71902.442831	51755.4322297	60787.9072137	68853.9907153	68335.7966605	64668.0344736
ZNF197	94160.6021696	51054.266585	42591.5751229	96144.3815769	63890.7508705	87605.5865553	98786.1201872	72937.6580217	61036.2530322	47899.7976998	99940.2861124	114331.607909	70170.1493847	83598.8864384	57687.822648	59950.5257767	74911.8205517	88838.2367933	73599.1352044	69447.3862362	115242.597808	96972.855965	53383.4890359	84203.4129949	29315.7057841	105961.279344	92683.2610001	63464.6926776	85647.2453494	104246.371471	105523.79073	77176.7685648	65136.7436769	69541.6337068	116673.073268	104465.296171	63627.0974526	79033.5760864	68476.6665066	63731.6913915	145736.613129	109872.513161	57508.0647104	118813.53743	77282.3033991	70120.6149245	76219.756569	56513.6143398	94264.5384305
ZNF35	70382.8132519	47807.8467795	53818.7723375	60390.7577792	97545.3429016	80648.8668755	88320.6223018	97441.0554062	101730.438614	59564.6600282	68611.0936815	85778.003802	86805.7226901	87684.4317312	53167.3385645	67473.0175469	65023.1582333	84057.4270769	61362.7161898	109787.372255	105868.4607	110966.952479	66861.0107689	72832.8986591	34607.7731331	84749.3628094	53645.1907087	50984.8851511	77478.227742	51524.6662565	71409.9006719	142241.770022	57380.3427513	78767.6762799	145863.056308	79772.3765306	50929.8598357	65463.2481975	78240.7198584	76753.4665223	86067.8227171	60372.4011191	58704.9301962	81405.2517906	70346.3400072	92283.5274249	57031.0804575	30704.9923457	66465.9443899
ZNF502	32082.3848044	50700.0429205	29996.0096144	35256.7011027	89776.2951169	140646.97609	31595.0630005	53443.206278	11130.1368521	4597.31803959	76791.3457497	65976.9753242	14444.1098049	22452.260466	38674.6955335	44390.0541189	57230.8825135	84941.5850148	5494.28630057	3198.37093261	30318.7585773	44422.2446255	15018.9129154	26629.6146629	35793.8215032	39761.3590796	19771.788791	43542.0837917	69373.8628745	84540.4442995	74802.0942116	49509.198679	54766.4752259	52105.9076257	118678.068728	13046.7681963	11400.3766684	32819.8007977	54237.2415245	44606.1894612	591.778086768	72698.4791282	20875.4316478	8020.10866526	32989.9964046	61891.948447	57550.5405231	15672.188708	79332.7087866
ZNF501	13090.9328926	25881.573711	18811.7095222	22579.6606446	66661.9697707	22985.528829	34961.2530225	37252.9831169	19552.2918829	5852.68862895	45529.1346145	37451.6887238	17691.8886469	16014.1948043	29336.4252487	28541.822521	26695.5212831	23565.269004	23395.8355413	15107.6575983	21401.5793469	38462.5210408	27848.6582575	33304.6910054	16778.9717536	6598.71201843	21338.8960192	20317.5197357	31952.7364668	30523.3391755	40463.8974166	18081.9833164	29894.7358752	37785.8869712	45477.2740569	5965.38653296	3817.23098065	19906.2427607	32505.5172787	13964.8403406	31290.758225	45546.184147	12251.1427277	11918.362236	18133.0110426	53336.0275468	34050.1520907	14677.6311602	41173.0671694
LIMD1	95568.5618158	63881.9242232	79237.9688768	74810.3975208	76821.5120347	78674.8531131	105433.030595	78197.4895104	54939.9897011	69978.210037	123207.196013	92226.7450705	100117.802309	72671.7959928	117936.442246	112207.358978	92675.0988929	56739.9448667	52749.2313265	135439.287897	131956.84973	76258.6753822	107413.08848	76277.8771804	36237.7066912	114189.39479	108871.725695	77426.2540574	51378.0925695	158145.73659	66340.057815	87836.0838594	74817.9197136	47999.6160031	60483.5805299	107513.537712	68077.9184164	78907.9144638	71780.8010312	61633.3078884	145576.218598	85602.3034475	51335.5611365	138475.767898	34876.2844967	48026.1766948	54395.100799	116257.927811	53885.8331814
SMARCC1	604447.4989	357826.311905	382823.149363	637646.224344	1184721.59484	595353.406573	495664.983578	455249.947952	803886.952474	511039.444307	656065.007288	727605.944844	638710.37523	283762.751532	763731.170798	496363.744239	417325.324896	495084.065997	390777.008076	425948.868653	1045690.58086	712637.43722	374207.635892	577337.552136	243194.366431	511127.556959	360790.288848	342912.958992	548578.527253	608978.972104	824429.300926	581743.11819	314204.00593	530375.351503	511550.582189	581420.89866	496734.345165	482077.200821	518748.171869	556217.290832	658086.453706	411922.390224	292549.270849	617467.978132	403591.118634	460970.013816	249225.041699	444296.670333	384417.614178
ZNF589	64352.0954003	66518.2046037	46600.3267655	61973.532889	64523.4734092	75966.180529	74526.3094428	98192.7524896	51763.7354421	41903.2715781	74262.0418749	99188.0165231	70832.5135782	65291.4262926	58648.9030688	50851.4778027	67856.0689972	75172.8325864	54522.0827889	82276.4101732	68482.9188483	67344.521101	35200.3695625	85173.6523075	47885.4684278	96443.3708201	71138.4518666	93659.1123994	44694.7979105	68292.510315	46645.6358066	29630.8267718	70907.1267295	30063.878308	31060.6986244	115107.283352	52010.7227892	65459.5022093	53664.3475077	32049.8501041	91740.0200679	83552.0957173	44995.8040908	33976.2637868	35580.2816259	56409.6646229	61625.9167525	76442.9714735	59493.7120379
RBM15B	270102.748423	272567.338552	272519.486504	379021.279734	446858.140315	368825.039694	306747.14294	268477.367769	188128.089965	290161.007024	285504.206224	339645.89058	480672.174733	286459.974937	336927.739072	279281.938393	344260.570588	294682.056454	282440.013285	393908.359503	366471.15491	351505.905951	183759.775794	392277.644696	437141.356029	299409.033255	215359.04686	306016.874645	348152.205587	271112.19701	265249.871422	454361.859279	276404.947555	231603.025959	375636.966239	261687.500465	263050.381868	416510.255426	310603.051669	311777.758781	398159.497878	260525.655483	236577.365747	317414.347257	248489.00236	361128.516585	263737.282027	213977.699363	256163.118627
SFMBT1	106225.447798	65851.9808506	59287.606571	108170.478998	110709.671605	110763.210557	137435.140132	55176.7582352	43208.9458066	57327.6690503	117548.33342	122456.901561	39440.4043548	69100.8712609	158752.342051	58551.6220654	90807.6628838	114381.598345	55925.9155183	104334.897632	181930.87553	74158.0688281	98739.5774611	96807.4246621	41761.7917033	238770.159844	123190.045671	145049.830979	59092.1329465	192050.707815	130554.243796	87101.4483662	75125.8228104	52701.4811366	106554.803386	177587.070296	58307.5979602	63431.3624543	73416.1511568	132723.689188	167436.0821	94997.1038956	58486.9236585	109122.211577	71910.3709137	84488.9052471	48041.3047497	102719.710123	92788.7298214
DCP1A	172241.807595	88088.3113737	96193.4581828	149654.608315	163446.74591	149438.8468	167130.882006	131409.285871	70007.8206105	92503.8615757	158293.753214	191916.950899	102633.364192	119157.720981	109216.102065	108197.049107	128364.176035	136732.315224	67249.9847826	105197.685535	165357.186718	108596.67196	130093.827549	137361.793576	74634.8790492	165710.863742	137039.634347	125336.138558	156020.192262	101612.03965	140986.529048	136701.378471	140470.774532	131805.049689	158633.341361	217167.001703	86636.8761496	134239.465824	121061.519775	119761.088305	239410.986801	239025.061945	99272.661091	155245.16738	124051.214892	182479.576569	209809.524821	120523.243289	201653.270762
TMF1	231927.320334	224266.454356	159983.169067	209991.664582	247913.658141	239395.260203	289458.61882	158865.13875	82178.418657	256955.651076	264238.098137	290600.048968	151382.909324	228069.790412	182643.911736	149019.859729	202834.969864	184572.304806	87357.5036577	222161.976566	406786.323879	196912.544507	228424.417468	176360.442943	45138.3153898	336837.783096	304421.650328	187109.748053	215982.865359	330882.909971	364378.325408	222380.958675	194250.962237	191024.618395	197409.873112	503371.965388	125863.906209	169541.093815	152716.293717	295246.207521	241361.710838	295120.072452	165638.21886	350862.266354	373695.841534	184487.277958	167113.194249	236339.356613	213813.948507
MITF	56771.2064394	34491.2771106	24138.0248247	56073.0764092	24547.2270885	16131.4827296	111219.240929	100624.803589	25037.1687827	29765.9645589	63034.2937443	75662.8577047	153195.87805	89045.5168431	59485.5215	52008.9975566	48820.8258957	23589.0516972	24783.0208481	45479.4073337	45011.5109783	79194.3332501	58684.9167089	72559.2756898	55593.333355	38628.7411788	63146.4554723	67403.5722287	85691.8594247	19551.0828314	32377.8465797	30993.8795518	115885.528565	132114.055002	52801.5386368	22000.3970797	15381.9602355	50243.5578615	47678.6307346	41162.2418796	2378.58920556	131012.029415	34226.8644336	105626.295765	48424.9967618	62583.174156	153282.928203	150321.079188	119846.764
FOXP1	162194.574057	51580.4209026	84109.146199	232708.591721	117353.386929	202115.52537	204037.830788	153717.002162	166936.661806	200536.789001	220387.877931	219881.240362	132332.257322	362815.562353	101553.143875	174027.307609	222918.153295	156908.062047	180433.835228	290056.706319	143911.558929	202401.238946	186581.045882	222024.614221	96653.3775198	155016.161543	183012.804087	146650.690421	242197.969204	160924.74891	177644.643316	86149.2558768	149188.446714	289565.044795	544293.935278	135026.149072	95687.0679082	172641.161955	79226.2842417	211902.115449	109863.202311	230570.965874	91007.6685132	291738.683342	132401.991442	177361.882552	160433.705059	150706.958741	241212.533106
RYBP	282974.66495	152240.999095	136408.689511	343023.528566	184503.997056	203612.335594	372155.801286	157861.034349	229562.578445	438754.627914	305652.657242	350615.73351	208975.913444	198023.56162	180323.037029	154820.427925	201262.55225	207669.145547	150918.290964	234214.159734	535251.665973	347353.963588	199775.624315	349086.912093	109948.070201	244576.07267	300915.90262	198494.797988	291222.311107	158975.336661	397657.143496	165425.767317	192068.822445	317473.498551	497243.062613	336485.03831	212767.94248	235702.378546	147279.718634	277493.572636	313962.459785	288926.784669	151261.879989	247316.037937	260937.082342	188398.608162	194757.421656	225608.215952	265347.739768
ZBTB11	113985.202833	77399.3353781	117060.95777	94399.1516228	76618.72268	62642.5245449	138191.675828	101024.290922	64827.3144251	157035.706919	136672.605756	119158.275767	90231.6483124	138962.621166	66800.148958	101552.667409	88322.7504239	75263.199203	58723.9052894	82022.8084912	145063.927378	103003.434994	132531.316545	104427.997964	30804.8404357	131096.864411	123208.726229	76283.6823296	91713.2083238	126233.272938	141760.300617	121848.076951	83299.0143155	88911.9100639	77131.0717634	143807.34693	63352.8572139	84576.4475339	75407.8909469	160524.792044	110260.283045	149985.551759	106903.470622	159441.94603	90517.0020664	77177.3552968	87635.029756	76153.4091252	113733.696954
NFKBIZ	94059.1956925	88127.8510189	24550.6265879	128483.768326	64407.0730963	34744.7121551	326154.844729	148786.012916	24341.4803689	86363.5832495	27181.0095479	508916.835231	108843.03418	177851.459331	95374.526126	88061.7257399	437063.521281	57182.8806603	36297.8426099	125614.655854	536510.355522	24164.5733439	368939.220568	238500.626064	199159.07891	260228.087974	44479.0346519	83534.1879164	162055.933803	26532.4382886	16044.9566641	177237.982563	257131.54876	59645.7444538	498235.189532	16841.5692001	46124.3353753	45346.9481118	50623.7077319	157968.625393	11048.5630564	385134.624877	322572.811044	20838.8189317	124812.818657	278706.236466	316477.481975	65312.5822323	72151.0958333
BBX	217256.359557	69949.8477457	189749.100537	155700.395273	127463.524395	142245.640885	193777.947472	135120.245106	84239.5456456	198323.304994	147070.440957	271928.27423	79491.5357283	101559.153589	111814.431517	131605.728915	125421.642773	92535.4953775	66619.7826655	62578.684216	177669.967108	128770.881932	341116.718827	144970.575041	48069.9239186	196967.408518	198993.968464	115977.730168	182752.773558	124326.417232	305540.930651	220207.498858	120298.166538	127311.939322	135518.445934	254605.761808	74334.2820038	145437.019849	118308.189729	135953.220734	87682.1602145	265146.642524	122964.808147	564280.656953	200088.689921	188233.171976	162704.871547	147739.144241	189325.635913
ZBTB20	7591.83978145	2694.39005647	8846.24987973	5973.55698803	4703.7517672	1579.9213403	4844.68420322	2757.52892784	2293.04196248	3407.79878538	2940.20540576	7172.87426802	923.72495489	4464.3724108	7474.8966638	3603.06736331	2834.29837732	1764.02400689	566.634252039	767.693463071	7805.547151	1608.71300413	10218.0938208	3079.2447058	1886.75247059	2568.49024794	5653.46621634	3489.28843697	6512.13250987	4820.48314188	3905.74647946	2867.35987481	3628.25996076	7931.32922964	4935.06831568	4074.29021774	744.634380208	8356.71610306	4530.0044277	4831.85407914	2066.57714164	18821.7034078	1569.83427977	8051.31480554	7267.48318543	4161.2609575	9410.46868184	2699.16278718	7265.80864523
NR1I2	559.545542706	8796.51714542	1935.97635269	136.158302681	82.2387712672	940.957282892	405.651434371	836.574561799	667.456872036	873.851395162	327.013528918	313.520140651	323.001761312	1292.93402063	580.837828946	65.2181306795	676.666964839	345.425768348	0	1181.14368719	1831.92943082	309.388007832	902.904852046	128.043450777	580.576982122	1106.49853439	453.819446572	894.747536693	963.395870249	918.246987391	286.153884509	191.809122303	1759.63850715	169.483869924	106.942346926	1800.53995192	1628.05149611	592.113538278	1239.05615749	813.953120831	899.874409028	873.34707001	1173.13927861	1425.10415799	906.605724227	1280.47126806	641.456333135	1510.119357	965.084392709
GTF2E1	149317.239384	103001.90828	100980.603153	107399.972226	125929.741315	127583.918667	146789.139385	155810.203517	163669.1113	85299.9451178	152120.936144	122148.56319	74783.5339036	220124.558759	137354.547701	134335.608881	96520.9538407	88406.1830749	104866.793651	109941.221385	176481.485695	134041.635242	154685.99337	180019.612017	69527.1084747	220932.375006	70772.1775971	90006.5576206	96296.8774276	117521.40367	141300.092211	101221.74338	86712.4757211	94987.9641319	181345.723584	113934.661666	158284.824106	85630.6617197	160006.776176	274229.984514	145506.202813	102385.997412	131233.740404	116401.343079	88593.7265894	116813.353525	99058.287828	240071.252786	85139.4157934
HCLS1	131539.071427	329240.650559	259586.496624	306201.34875	61256.9043537	86409.6579984	208402.030554	606216.337537	231809.432297	177759.503948	122942.393844	201068.228793	418802.777251	625222.689693	257624.19252	342256.592737	266272.178186	569805.233908	118207.900678	124573.300202	109593.542583	112393.389721	156898.773412	226668.472484	302026.551002	105271.883428	315019.753465	396571.767059	277472.500348	247095.397705	88357.5126362	524776.633649	403241.684907	157937.868639	113893.66247	153527.275954	76640.6742443	122438.171181	1023570.19936	164714.971506	27952.3642907	148851.447178	201743.304211	110089.193964	443175.745668	218986.114134	216970.270135	201333.909447	129326.64599
ZNF148	160597.296655	101363.456838	137420.261058	157010.147093	143672.650007	71666.9100788	175828.327146	128842.388994	86565.2733701	152767.212178	174318.48303	174161.701226	69562.3484518	90675.2288208	130647.423306	135045.377271	101123.784446	58987.9624378	94719.4743387	81533.634224	126723.859863	154321.732761	199954.452116	128169.714164	31650.0451918	215045.125423	136603.40878	115152.408698	106288.8588	150142.734447	259059.354972	88190.3570555	87014.2004983	105482.038686	144870.99665	251229.384017	62935.2149623	125134.098383	123507.60089	135392.221089	161712.764396	208394.336259	134570.492217	189673.150485	140407.939351	118203.628056	148619.16151	117193.845248	143734.902745
KLF15	20879.7621716	29037.4246555	56530.0398415	27783.7518561	24861.0577634	5037.21613806	6418.90338305	11064.3448101	9187.94426413	2751.75231587	2574.40864804	10070.1832536	15989.2903489	16183.9770078	18875.8426088	23782.0157686	30115.5870323	6899.40150489	549.059570767	16934.2719208	2230.57705798	1851.09553679	2107.34367123	13063.9387872	21527.444887	9158.88029105	78027.4656679	31951.0638183	16564.1509544	2802.58286036	3784.60616848	3261.63061236	43449.7894691	10247.1090344	4647.29834362	23435.5391636	4443.16035844	70160.7912731	23995.9452705	17326.779368	1473.52328031	80333.7437157	39375.910079	4453.12331713	35514.8998137	77256.8682807	418820.50174	8559.64072335	79926.8684349
MCM2	187184.050138	530972.901292	253794.512932	266791.528091	351349.329929	226808.312116	234278.071205	223020.723873	588444.753704	1159593.23109	264738.698866	246828.56101	249825.758411	91897.949456	485145.673453	233314.855713	194280.229919	305564.204451	473231.554257	73598.8130227	143134.013745	192847.513824	171990.621789	161638.531196	250780.772237	316495.341584	105859.958981	119531.061084	128807.678714	459015.712139	373483.298343	216763.070437	125153.190269	70045.9512603	166579.590971	329925.771826	272505.282644	99538.5755621	389592.466133	350307.147174	642995.743775	60699.9843482	171425.290313	248010.993349	108078.16619	138310.331276	29674.3188185	152299.441838	94550.3633634
ABTB1	54719.4182261	162539.588609	117411.536638	84359.8668598	102985.183142	75206.9047624	70154.1549919	90935.7598208	109642.526147	81415.9959746	66296.0676738	96026.6965191	145569.576513	95536.6983525	65315.5397538	59640.7554789	168105.479049	93793.9902235	106172.351931	71441.4363158	34271.2383264	48192.779783	80361.2267353	123312.163018	197954.385613	54132.507433	242717.595133	165525.151249	83379.5546082	135616.109735	69990.6387521	38270.3649799	200606.920894	54135.1987285	29666.5792345	95239.6194833	68808.2422987	156780.269196	89725.8315061	102570.006671	173088.449838	146176.207011	109727.145366	46766.6621043	126093.28171	107497.378117	173293.519929	118274.959713	136464.709278
RUVBL1	140615.416014	371569.426776	226361.106017	187278.867953	294802.857846	100564.638152	178427.246946	164755.842622	462747.585291	226930.001736	208500.020414	239384.299843	209734.168655	102558.999156	211266.610991	140528.976236	125912.608393	144998.443957	371554.85449	264431.677629	104930.722093	209841.348938	189683.516407	168383.605272	198044.657676	209008.225592	152892.135399	129560.04329	138669.109057	292320.870358	224572.004311	147145.501399	109612.043332	68864.7552044	212482.798163	219175.445236	294619.562852	147232.311222	192075.40144	176003.994248	306533.026298	79863.0465931	111941.227608	211231.605373	113972.621444	131175.247184	81080.6148326	136962.56998	114246.097196
GATA2	33846.623141	26477.4864495	5309.73554703	217384.959577	3175.79244271	65481.749801	32186.5399684	42617.661884	152463.739232	24746.5412842	93724.8715603	116228.37779	74839.631241	49051.2280836	23411.3727612	57374.8277427	488498.276771	48116.44943	62247.2738763	14756.7934754	121589.745391	51026.0085788	109921.516038	269481.756952	94496.7323201	39677.2585659	35050.0462633	65757.2017363	56967.3975584	92825.9835015	56546.5970182	8911.59635653	87282.5115411	29554.3722217	38587.4801243	20521.2919167	149098.011604	58796.9710985	12055.5280425	249755.086619	109245.964121	90083.4086941	255994.147944	9921.79016611	23558.9125345	53568.2479567	93333.3864139	23463.0265414	63084.5373806
H1FX	988487.047898	1209805.81732	1285558.8764	3005785.55987	1367516.54869	2061266.83074	1578445.65289	859013.777079	3499999.82977	1475247.17463	788363.398162	2505613.47761	2571932.06709	841094.279527	749329.093288	923339.209093	2121920.63617	1502635.4266	2691635.02301	707295.294483	440151.145694	1368382.98816	708895.308604	3038786.01265	8538888.55166	644944.140274	2033111.52216	2378564.61213	1341243.88589	3061854.76266	1988091.75696	804057.476754	1458543.23228	531945.313117	4044617.1833	1366548.22574	2013532.34979	1933625.48133	1218054.33034	1880801.24225	2424003.93676	789456.277991	1298803.38098	854098.070774	737647.705563	1175954.5639	1033310.69081	1820183.64949	1653217.58226
FOXL2	258.048900009	1119.10107833	4761.73637474	125.585846199	151.706146105	289.29785963	280.614977076	0	1055.36571676	2364.26181835	201.080996355	231.340675604	834.179454464	0	857.178843348	120.30811148	416.083297657	273.089190383	536.071874373	256.336452873	150.194069512	380.486086195	587.855896533	590.505492483	0	97.1981751237	0	0	888.589848785	130.29949208	2111.47624621	530.746428065	895.451378431	1563.2374084	789.107670635	0	556.161524434	624.15651099	0	1601.60228296	110.666762541	763.136698727	254.599304613	202.222659585	1895.40788104	1574.72652118	338.084776786	174.107650412	593.431506933
ZBTB38	159321.887384	126153.021948	179329.927255	123189.333627	99411.9439657	61170.0441028	181734.968742	143974.31031	69441.860392	115456.379765	102323.716612	162772.318834	69188.1178893	98222.1863583	264410.021201	119471.783138	100921.53106	104365.253512	49058.8291802	78204.864749	222446.369855	130353.565675	167273.824916	158979.149262	39033.9640932	146831.69352	176774.655105	134996.70254	175839.561095	110175.997073	174751.907831	104334.527294	139501.472573	197223.579077	81956.1952953	188793.378476	46991.266395	140043.454983	153841.600341	136025.803445	119836.746457	301299.192155	114006.247261	177167.329604	259073.23751	192707.531433	220141.425846	111831.15023	226199.628845
TFDP2	132140.351972	79298.7103761	102556.014971	97611.0368461	112631.019228	56781.3252215	96921.0369909	94865.7109644	66372.674676	214194.827441	80511.1779423	135310.153895	56684.2162997	77704.3212237	138659.557461	116517.450339	114464.840442	99678.373199	70188.0612868	71869.6461857	120696.43778	90048.7228661	121385.802589	144697.908621	85277.5085798	47258.4847748	102323.124934	101699.432729	97911.4276754	144468.195544	86327.8669453	95690.8254588	93694.5881777	92947.0583904	62397.1784286	108192.188387	51191.0663871	129544.636066	114221.36263	60548.4198283	194931.71173	169086.747156	79154.4679779	128022.12254	85729.2022128	144981.988063	182781.895689	108985.227998	133098.139935
ZIC1	221.195604268	42927.6222702	89611.6095087	645.901698552	107673.292313	0	681.526892851	897.638077996	36411.9004645	76043.9110982	473.999847932	1090.65945609	153.224138492	12138.947375	81053.2904949	154.689433376	18189.6749758	39.0146521867	344.634511654	164.795790412	193.116118469	978.440711222	1133.77761179	38165.3955118	803.283616867	124.975202837	59.8002361153	3961.49931997	152.337148922	0	509.041524864	32756.2409074	1199.32397466	334.995850741	41430.1817098	1054.48411329	23216.9080876	2541.33311112	0	42.9021622411	47.4309353999	1453.66490364	2346.06563157	173.342197476	191.142928869	4521.93618239	289.801144251	0	3815.10367115
WWTR1	292663.186232	223241.22197	657704.140697	239186.043753	219343.500957	85311.0090321	281543.100078	322842.882494	126730.986403	102804.027354	253327.14767	269350.776296	91768.904619	167357.557134	717491.461423	186210.701288	252033.765456	46964.7188281	119049.533063	78790.6440487	183776.502984	246071.529541	239765.571913	200279.795912	88564.6274433	100496.581852	152679.577379	252663.973912	577126.52732	67812.3750401	319882.925869	396876.739547	315870.167736	667707.008279	249526.481947	96012.238724	98924.4959652	425896.567188	221258.041175	213657.847071	53412.386223	346183.43712	191647.243367	135077.922134	369338.463262	363415.959322	312398.089648	189433.304053	365065.636263
TSC22D2	65660.6818422	61787.9705252	35985.9580683	63440.1484085	43585.6331293	40004.1630349	77420.036296	66396.1251761	86173.090407	70288.5967088	64553.0102161	73891.6007039	70023.0638467	51951.6677435	121823.377143	77996.4101814	68676.0045936	65132.6295007	40914.4369973	38135.9420495	73413.339427	83364.416759	90296.4396131	76241.0360354	28094.2872374	67530.7297602	70273.4515684	61770.5161821	174754.664165	62370.6931181	81368.0139106	188595.276349	94824.8479356	75647.9045804	102415.139225	85653.4524012	58412.5264913	65335.5980928	51928.1566993	76649.1809003	91707.5348564	94098.0723071	75850.4119202	75604.7152082	64037.6040844	55274.3709619	103340.826916	58547.0823805	98034.4300625
SHOX2	31929.4210592	21676.510966	12389.4811741	19097.2882486	21841.2646619	7443.55651458	36398.2006417	44742.0163863	14136.4965185	15782.7204066	24473.6298455	41933.856364	16192.1519223	21116.6142396	37728.8882012	18642.5347865	32478.0024184	9737.11371949	20921.944873	1482.12771661	18193.3246998	28379.4352492	28551.2694976	26289.9599923	14087.7954119	14274.7031747	13069.1904726	41609.1479048	49528.3249099	5499.72331871	24874.7701254	22299.6259059	97142.2085728	89572.3260378	39010.151622	12447.4063739	15499.6980453	55395.8389064	13959.1679882	21530.4394908	5694.85237335	43045.6830892	29883.2968931	13621.690291	13989.0670928	19211.5699176	48967.5758411	29395.1692261	46063.8415249
MYNN	79410.9011659	64756.6309081	75532.1650089	81258.360189	54910.3970056	38291.3233334	95283.6724927	70761.9961505	79693.618332	101374.824249	90439.7575631	81967.7561106	57025.7636637	62985.827999	106310.240993	66084.2798115	78513.7322248	78547.9337028	191030.568985	102633.917117	116639.810073	93313.0339956	138359.152228	72447.3978533	33121.8408383	80505.8558485	80760.8137451	68396.4067519	75091.5800626	93860.0907557	100973.405802	44581.3105689	64503.0508604	69235.0482139	72308.7039343	95753.5432803	59796.6235293	75861.0226066	157520.771415	89992.6836356	86647.3625582	104332.181233	92930.4790586	76077.4703366	52104.8618859	67819.9260715	74179.6351945	64968.619182	91159.028133
SKIL	250716.093333	192892.333498	162952.003942	189945.687537	208980.479773	130562.034859	299778.794805	176390.235195	179269.390533	207052.848427	249560.249929	259453.056568	140439.472363	201881.306922	264072.037406	167036.388002	183518.113459	149998.232505	204256.369172	180543.706074	372190.380644	272869.945755	310328.412663	169461.50883	36531.959832	228330.016773	286134.57038	144154.497985	349932.231856	240690.320156	388460.636554	152391.608236	193250.736894	347241.632244	415361.175843	268093.195447	91894.1212946	195413.782983	211996.296946	469168.519805	239643.015287	216256.583287	241877.076819	595416.972097	263376.706278	119057.358494	216640.636841	168964.360071	189686.983944
ZNF639	88672.5094315	89157.9350324	122655.071766	99447.9875609	110131.694958	49151.5966887	102831.404035	110681.438568	117816.988103	139989.51564	129342.734419	101631.409172	87068.3340591	139723.726444	273770.725356	73472.5267624	80985.1128217	119894.728015	133140.902173	43824.0035105	93831.834382	123059.068838	66625.9966139	77297.9868407	53119.4609849	130251.32222	26939.5224928	83040.0200251	103544.619531	145627.60594	160063.151985	106086.608166	78162.92469	130303.666712	91364.9834137	180597.599917	68592.1735478	93833.6369433	113670.294269	143420.533536	183551.288919	126717.679969	95607.8480076	34873.5615167	96634.8032212	126305.556447	87706.3579633	73156.0799033	109909.285879
FXR1	294091.217548	250098.712486	270034.155746	286709.319617	306068.206953	169000.398348	205872.120252	278356.186016	324646.496274	352801.10974	269651.976571	237984.321502	160570.558411	326753.69072	421995.379287	175614.950015	203594.797418	308555.737101	243755.848227	182715.183922	253114.362514	226943.055179	338383.912387	217749.493112	159878.030071	246433.813175	262419.708247	171032.632084	210733.056009	284321.717859	302140.192698	183879.890084	161924.727565	264049.654651	267438.926404	385514.370465	173941.468454	219917.668323	217861.862132	225716.155539	320163.653841	222984.532338	230519.784377	311237.684365	222728.647719	256730.183475	328035.673787	156229.420629	262334.227844
SOX2	1347.90246158	1299.01227437	0	437.326597726	1232.66525958	335.806548564	0	1151.56811589	58393.1233318	3118.5796242	350.111380642	12352.4689749	23377.1785689	33741.275447	0	0	9820.48199167	7185.15445652	4666.89710767	743.865333298	23623.0527871	662.481842477	14329.6015336	137.087506691	2797.13118456	9590.05234025	0	1149.53517587	2681.75214133	0	58515.8503852	205.357120396	8315.26198451	5262.19427332	211588.561234	856.7630969	774.686748957	3260.24291345	2487.32634679	59606.8267478	8992.05978641	295.27387587	1182.11885644	117.366394351	0	12977.9898775	9614.69785125	75382.5157429	13260.0534561
YEATS2	98845.3885641	179225.447712	139942.229548	72678.4673395	211859.935665	53424.3654772	85312.7877269	174657.391909	63959.6028536	215647.704403	83370.7467816	123670.880827	109608.174264	50244.7365764	306213.386382	101068.438763	94249.5082802	103956.504474	128089.812626	55574.7821847	92754.3096218	70019.4717711	111441.386588	78163.7872403	65964.6271283	100311.724306	60340.6400508	71333.1866123	91223.1455203	88730.8408006	80631.1074813	215430.297383	99498.660397	113016.722188	47334.8693498	85704.3734636	74412.0810142	100687.455974	200071.434847	82062.0224766	97394.5211172	106013.701708	92760.5465942	76161.5150925	136340.414977	88567.927237	72767.0042051	103295.160376	97722.7174255
POLR2H	307575.546225	259756.071409	287484.880076	308111.740228	267260.322174	198363.201815	262530.47461	354351.874375	487478.378238	504895.503471	271649.112873	376235.091162	428717.178206	404283.972656	664042.09097	204584.134779	320082.282623	634124.240072	1416843.1611	567573.883687	214462.426949	339648.747983	329128.638516	272666.005004	418687.930337	270008.62117	319028.291056	270268.53306	229705.729494	353625.159264	307616.198991	297400.257523	295576.374709	216547.536533	470645.348426	357700.317738	445752.11232	277787.342793	311539.127135	168364.176354	478168.356614	171314.755444	337811.599331	158346.031173	201692.031774	199741.795766	139496.508512	424894.833686	195883.70478
ETV5	81149.907816	88052.6357839	56694.2605032	128993.48242	66813.7713708	21162.4974365	76419.0548209	109785.848322	28209.8722526	56244.7928992	73293.8845428	70250.2125898	85435.7584657	47964.6877973	110970.458748	37198.7828558	73495.0929648	58305.7502284	47569.2644875	29190.2141643	59767.1309474	91342.0723307	84871.8385979	60445.0052728	79555.9325152	44224.7508681	88597.2964567	95512.6957201	97211.790718	32951.061712	48632.757692	129504.811758	95553.8990254	122054.866374	48004.3219759	47622.8070818	32491.201651	127402.586053	99832.299692	90989.6149798	12629.9539499	155430.125803	56256.7704927	61814.7478093	1020813.15888	150344.938316	62210.7455295	65212.7976745	151488.350669
BCL6	254543.467797	167673.870474	387664.084393	186251.614086	425386.179741	76387.0828377	330380.737379	326633.519574	108008.511416	88743.5580412	273520.713131	281213.194291	140497.606814	241580.288044	390607.091637	177124.194556	368120.693442	113761.837447	175385.419994	141223.146707	127900.683846	109810.251623	181835.14108	279290.561363	337767.329672	217157.484919	372661.032816	220785.705216	313503.926263	188441.591876	177952.790259	178509.979633	436694.921063	333742.025247	198473.469606	893597.345109	84804.4983104	266216.232583	169757.775164	240507.484068	75783.7715033	548249.13087	246950.885102	316051.591262	352396.067328	518835.500137	617740.982925	156774.908351	468689.640767
HES1	875567.238709	175463.778471	819210.274253	740484.845244	1067043.351	245143.17753	262530.054001	360527.817715	699953.568668	474780.245007	540186.543566	864634.540955	1516388.16064	629680.892443	683757.419056	1062006.72638	795605.27658	282403.226995	1527320.76542	977093.955045	415381.657128	662185.888941	1366886.31281	242754.516959	1200886.35678	333027.439426	921376.285101	674562.795048	611172.873679	409760.370366	564354.68245	510556.442703	803592.43027	1038044.07198	2272244.91351	249900.870624	1027681.14473	842123.57297	349818.204673	1002147.5298	891576.682522	602519.040585	1412938.59894	525803.040417	705505.537777	506129.017455	329528.215076	928307.288678	1015159.92442
ZNF595	53492.9202264	37073.6495716	76733.1534158	107953.472054	22278.2384901	52139.1536077	68681.1042673	52078.0958875	55574.2759983	82893.1626691	63681.2216474	39548.9913667	53649.1224977	98397.8100185	39654.6832042	177833.956533	72417.6070348	68999.6096323	68783.0782495	74716.3079535	44446.5609473	70760.7136518	44689.6781449	43533.4221827	47361.6965853	79946.9942057	89720.1507423	42233.6534644	58523.0290096	60399.7613775	54810.8739782	58521.1924297	35448.0524875	86144.2383823	81058.492225	53830.7034868	35639.1359291	54045.9154192	33374.9487158	96959.4975271	69274.2981704	99426.964857	54288.462833	57593.507052	46803.9680917	83507.15084	61182.5994681	38222.76044	81974.6110325
ZNF141	40165.6212685	28984.2113718	28798.2406253	38840.0684606	12249.6110171	43854.2364515	52679.6809388	25638.3845802	15453.2500775	22102.9330865	54785.1370833	36184.6781385	24872.8338546	30507.73655	31124.29214	25293.9845284	35357.7599577	27736.8094829	17423.0825353	15425.9073493	33064.6465324	40045.6472072	24131.447027	33946.2938444	8974.12921713	63921.9297532	45489.9479969	28247.4320821	31768.4484434	37320.1881573	33039.6269109	23539.0599254	29558.1578356	24768.6040796	25346.5463978	17242.3573251	23724.7816868	31459.0800573	20820.9942946	32889.7804996	46140.506779	66485.8343834	34586.2118543	39383.7607045	32613.5625765	36066.4736297	23349.9804959	24580.1567754	35335.028812
CTBP1	250639.461482	386074.05568	440579.73444	373782.396231	272417.842924	407507.833486	276604.18434	229360.708941	345799.099376	236168.897317	213827.814363	195440.55112	581976.762152	282709.626672	387050.669228	329112.645193	365522.583159	367669.406609	393876.068747	289354.326345	155863.693545	251351.970946	191248.4504	282819.54398	584107.818569	259247.040116	319622.613607	352992.724722	256566.55053	273163.791764	237939.710069	353793.795773	373482.102923	348010.133034	375791.646658	308497.632303	417717.654997	418201.920103	245759.762555	382198.507336	394937.697169	197109.632626	421830.121842	241710.42509	271861.060599	260796.992753	273588.726847	291748.510233	224169.74541
MXD4	328318.946205	408630.372129	385186.863598	533514.635229	177687.876323	251143.92741	249578.912901	228469.848814	269336.194234	136886.398502	173231.833911	197484.026728	535113.558214	275696.186007	350189.316117	411400.865692	550625.582829	185173.842949	301976.851691	463916.789918	173899.441244	226048.38489	184038.333099	357630.79143	703671.53821	129993.428824	233774.390759	496402.802121	299525.181342	183094.970607	149932.48266	180234.333149	441969.229662	279360.757463	166163.345825	136255.841493	327314.84691	761297.284107	182436.119093	174376.136276	275613.894389	320337.89217	344869.421546	246885.2158	225697.795214	260587.743811	445659.324291	300779.969954	237043.054064
RNF4	260297.084497	279518.584431	296749.273243	275984.985349	173175.904566	280674.873331	252922.267406	232687.740218	322882.753685	199945.669281	248256.451254	191353.917145	320312.174074	356237.513407	280950.019486	305369.821632	245748.067329	308523.157682	282416.304863	338485.657236	181152.26945	261325.105683	210553.37878	199308.226073	213142.507763	330248.595137	173381.053711	221592.485723	236739.892027	306733.230967	310765.175185	237587.482611	202773.779127	364985.250682	118020.088349	403856.478924	225920.216512	226706.544312	237186.559295	367098.754083	277034.72492	199131.686502	235722.447162	251694.444405	208737.517158	234918.135642	172414.260871	206013.009068	186437.976559
MSX1	28937.4454094	67495.4318681	14741.7293687	43545.3519657	17325.3428017	172557.917363	42472.1357049	31547.6551599	33398.8402374	19074.9393742	12312.0850724	40584.7385467	22955.6742327	58250.7942824	14595.440915	30127.7615735	56487.3638149	17034.23882	74866.8623777	21338.6191974	22422.4513836	42013.0672418	61338.2799398	48750.1279691	54339.9173665	37179.4940379	19966.0577019	32703.1912864	105636.902491	17211.3336632	30868.5128458	20204.3315166	79931.8654003	56354.266147	133549.401064	64828.3403099	35966.5985087	46804.8196082	21425.1877652	23552.1942794	94864.9582853	55068.392143	47817.8926497	20590.2730437	18562.6381651	72802.2811381	142811.953407	34496.9671416	95329.6630392
PPARGC1A	2977.67539806	5255.50251113	4094.85633044	3033.1234777	14167.3722364	194.085063602	2685.84072462	4289.21749882	802.430704208	1441.94859165	1106.19521256	2141.79539103	5628.34877758	2400.16489133	3191.62104589	17337.0850742	3647.47218547	5447.47195773	1798.20797786	206.36617287	3043.03271462	1914.46282215	1735.28354665	2376.96116133	1293.31934992	1017.25446151	1198.16127176	2081.76554979	4769.1197588	69.9325884813	2266.4861859	142.42753732	7569.36500762	8767.54715493	4552.83184155	528.192741493	955.18567317	4647.97065832	2491.82656925	1987.80281506	148.488935755	22094.5898746	2288.80558851	1193.87644491	1196.79740008	8958.75970198	19052.4923382	6541.12992413	14849.9956356
KLF3	254734.752209	178764.504852	287306.740816	187966.471982	221860.758551	294695.28387	316918.275252	273493.170585	164346.46451	127243.75393	265518.514496	220010.640188	210876.19071	253495.388771	208167.352256	329370.823981	260077.192106	177865.847657	185128.552596	388531.648861	282754.301019	252397.200577	174146.264617	175724.45683	284526.377457	282851.690755	421672.32893	179220.389775	365689.620071	179931.597021	276683.654193	278642.577114	243490.962491	318190.879914	186701.314702	382091.238344	145717.958254	206873.984469	178476.587182	282903.589172	256631.986873	444954.707358	209224.994178	358407.855071	261237.381225	322571.962106	549947.237014	174049.199789	294485.673298
RFC1	294004.840988	195404.722813	166610.974883	265159.613441	187940.41221	242240.479302	268299.032502	183403.80018	181753.743244	197763.474884	353129.007303	188985.999015	181807.61117	226774.82269	212168.187776	186944.288694	203521.301206	375694.815878	171210.400461	233409.117968	163583.79362	242625.627582	211845.762831	203529.061003	126117.527895	272039.014137	225417.475529	208134.591216	235687.014132	426397.993467	341023.209835	193033.337668	169307.355995	176067.711077	100724.222159	395136.638792	153073.066265	195884.845205	192681.076954	203259.222265	284007.906009	293176.374236	249694.257292	319853.408722	229448.507117	291770.997265	307992.587611	208051.250513	260506.906407
APBB2	375173.294331	67945.7146495	95440.2861172	183930.387961	46076.6201935	167493.222761	310590.530569	81204.8496569	170843.068167	159207.774372	248773.556553	289804.156924	94979.5704042	262287.392407	95048.0405123	137493.451048	169029.514839	165825.358987	91124.5640203	239337.028927	280518.069922	321972.533006	330090.342047	228195.952519	70379.9192436	575063.640405	268118.900413	186067.342777	196701.968988	352008.593481	398853.723398	50506.883176	212973.522409	269071.635633	117170.033662	452678.016724	70948.464518	229234.257105	62879.6074872	409275.766473	129689.085803	264942.849243	175291.228205	293393.737355	149059.425736	162274.972441	483429.577761	208777.891213	261372.832998
NFXL1	59342.0104167	89303.1346371	79976.395699	49835.7910684	73820.2648272	87324.0814975	69855.773385	61167.825007	47829.8301606	45092.4079765	77897.5178685	54930.7702987	83182.505285	72536.2945726	166311.668625	65194.4665629	58827.1012847	62948.7839692	38535.067609	87046.5771727	48706.7074559	67572.8524456	56662.0410725	41487.6200558	25256.037434	97122.566909	77242.9407577	51002.5052431	55840.5001089	138250.754149	78037.0647727	51330.0289531	54101.7933616	48813.1688167	29773.8560134	130523.991806	65631.0041153	66183.8359583	68956.0381095	76058.6065425	84879.3090378	88091.8175995	82067.5932217	108268.090736	85586.7614397	59313.6336946	36399.4179612	66145.6863272	72094.4837297
CLOCK	116793.893081	97786.3646397	124452.900073	92346.5442202	129800.846561	174415.643024	107567.714653	85785.0038628	94747.2921337	74198.8839251	175811.387569	80895.8730268	77904.4218842	79816.1618264	207666.141084	146527.823175	77013.7685931	79736.8737348	73785.5398689	59217.2838691	117462.941997	103585.145338	97776.1324087	75771.4537887	36023.1247212	166760.781972	113843.847903	71347.656952	118251.66652	181930.859681	178761.161261	56423.7631706	78863.9472133	134565.833863	74072.5682689	168895.040351	62233.6518321	97557.7136497	54311.8979247	122983.246363	101576.102395	139063.644297	102383.369935	164246.595475	99874.9917376	87050.3385278	145975.388935	81003.9026091	94521.3612482
REST	186502.59611	126664.610305	150439.783882	148651.900985	174507.436836	245738.820952	215399.891786	179223.566646	148281.492322	174098.425903	203874.265432	163551.779689	131748.297172	152067.467777	189100.885794	228121.223645	161167.515998	147904.453256	84132.3531652	90188.5894398	199093.614616	205721.556675	200937.360392	170496.550633	64062.3913693	294647.183432	159883.880814	144953.543751	139848.33689	121884.765623	185481.791433	123387.902909	129000.872747	186697.689322	192638.764971	286351.013317	106455.398247	142700.734417	127658.384696	188042.188731	219092.130138	205335.0741	171359.366171	268543.442871	167663.981512	134888.282649	164882.096904	151435.879642	152431.591937
POLR2B	435233.032401	759632.226994	727335.259547	467958.827135	625281.934153	725686.914254	487719.957748	504138.21626	449002.521422	347053.445593	552707.920292	308134.979302	396566.81645	361658.196198	829279.295276	607318.527238	347324.187141	490209.180816	191324.696958	532257.970759	394942.992379	429111.414928	377525.735559	327453.91837	221229.776489	560087.296166	329131.662804	382168.400988	562767.607813	495570.811717	599243.694572	336870.451208	320251.637669	610854.289576	225560.329818	685938.967212	328973.377625	361217.25355	364312.36597	533413.83033	371064.867136	441617.633319	427715.808174	697793.892197	441851.627276	470946.236855	421150.16109	264651.152343	396604.928341
YTHDC1	305769.249708	249210.511005	354243.819408	311269.216772	301436.789964	431601.40743	300477.877782	251400.122179	324398.440086	260920.966758	393621.283275	256608.459538	296302.799513	328595.839608	281258.394861	309317.184561	315222.998265	405852.737837	174006.285129	281463.36707	334100.908754	308917.597563	282503.923598	284536.583086	216357.973374	345699.823207	321398.358941	305502.10524	299453.111039	370732.869536	367759.401486	213338.1006	267582.809288	230397.474226	257777.136199	448857.357969	282845.307518	302667.356406	211080.956124	436285.717441	423579.850655	427535.675223	341022.336171	367586.673532	245448.518665	306101.172513	249072.709036	264769.455572	372203.076657
CNOT6L	150232.325713	86835.071332	170866.348923	156357.743741	102801.15065	258425.867992	180395.865955	153854.762066	125436.267613	81022.1169295	252386.349962	102300.145836	88582.8761414	207086.160202	128696.579429	144429.264906	120201.017305	301705.499261	40649.75164	81941.7496537	134517.124565	138127.487731	90525.9484378	150863.959592	79336.1436658	204525.724157	159854.221987	133896.958144	201948.724948	200530.932221	220933.405212	81483.5437193	109659.598012	109191.824234	76670.2303272	263183.226601	53413.5224334	157293.987516	132526.88271	204771.667706	116726.19016	272452.791507	116787.367428	202935.792926	171381.847654	159915.974723	142606.89832	107733.713707	180274.28557
PRDM8	6644.61856444	15060.3409756	7706.26099991	12535.8379246	2121.96822584	13059.2004826	12132.0105477	14226.9642322	6038.90936402	6559.29465718	5113.80354288	10737.1217968	17956.5465212	22082.6853455	6131.0800388	12850.416713	11463.4515624	10822.7563558	3237.87178437	733.391553758	5872.74197846	6833.92568753	5419.40865904	9986.62168132	17959.4017085	6179.75320043	4790.32737097	23296.6282013	15366.7940755	6793.12482748	5537.62028487	4049.31298344	27611.9302611	19182.061016	6898.45734188	5631.33128817	4526.09776258	14087.5307892	17983.5646568	7891.67881656	281.442847718	19030.3841377	10521.6436685	4499.98309292	7159.59002628	15718.7430292	14939.0658076	8634.26705921	23864.0499972
AFF1	285928.880153	96617.6032407	223268.246982	239808.261929	116517.359216	308367.151901	399756.510788	192362.827269	137867.622893	145422.067178	256224.260633	196228.040907	103737.000761	172303.312128	144116.667116	271157.658298	224054.220217	139360.05408	69495.5027158	164866.409137	155828.586106	198181.405114	206711.44092	234599.562996	111153.438963	221765.565083	292821.871132	252462.258395	262993.204632	322786.00407	308805.245328	104914.586028	251882.304981	174062.895208	121546.677992	199296.642663	142416.18259	241895.801518	143614.139905	191850.21928	75853.8427885	425639.598393	174439.711031	312858.64273	186416.945331	196355.852785	365010.049377	261909.215499	292888.111953
SMARCAD1	174082.657427	79374.0122417	128812.844251	160796.970367	240505.234835	205189.078059	180013.566929	157129.956406	129063.331003	129006.821273	212210.939393	128753.618607	135455.672262	108070.342221	115553.458364	204737.439799	130990.729057	117435.475053	46319.6499225	86819.0410917	232799.059088	156073.834571	130878.515357	110176.98809	58703.3981272	233091.324058	120688.224601	125990.487718	174498.186327	140521.965046	174760.405298	98585.6655993	138504.293019	138684.14318	97170.4285683	262778.660378	103306.496601	155447.202351	124425.548776	164705.19972	151870.804785	197818.015184	169696.808565	241494.360938	138066.779424	142395.612265	115287.605083	139336.976421	153553.339966
NFKB1	270318.244695	260774.30927	447665.29469	322715.763217	263380.199485	214713.107817	432846.725992	335110.207115	169989.191377	178157.830002	217719.348113	227348.912027	259446.970449	300565.638471	189917.000726	359800.567846	358663.736082	361655.487543	116585.608637	413840.639058	268702.339251	211128.685706	609548.800057	216159.589314	298515.608823	193987.440616	439979.343607	272934.56365	379212.39979	363803.866162	189121.260889	246113.20626	285019.118315	217248.701518	157452.771009	324660.15384	222255.940316	229292.577839	526531.859481	192452.531127	160556.195139	284143.792097	264212.066147	327042.648968	293470.808588	338729.488384	236658.019941	313716.692155	285302.01319
INTS12	171619.039727	100939.787113	123372.566093	215081.343026	155344.290727	212215.606726	192823.317758	121620.473165	263322.367273	85830.8336209	185132.285767	161821.912128	109984.263018	181095.428169	89666.3069989	161556.104072	204725.510146	158420.812284	139639.501367	226891.143074	130692.832215	251979.595562	129587.228376	220915.514468	146704.518236	149584.72414	170862.885772	166665.245873	141406.909623	166585.27591	183633.381042	97862.4957115	116626.510324	131755.681905	146189.941268	148711.348257	157861.161109	147634.076328	116340.918777	168511.744768	123261.134242	159372.199205	146170.118959	173165.697132	131360.415069	160895.469926	107805.57947	162122.860718	132148.912613
LEF1	127560.897341	62211.2833203	49345.4724962	164614.511712	17417.1163492	30695.1990348	226943.467461	72933.5542932	57615.4349645	52685.159684	83973.0706842	97553.8298493	68731.8345935	316896.159873	73866.6992916	81695.8727775	78257.9390349	263255.313671	55857.6193658	71481.6982706	72569.8745534	97769.0439502	227954.382895	288015.865163	87994.1794181	322081.682136	361904.670802	122049.822731	70106.7721305	113578.428776	167162.868603	63244.3621369	40135.4428071	114998.520415	125481.992677	820561.673093	96352.8625818	94921.7943751	89000.7526005	54302.5815826	8309.7300119	25144.7286752	72521.1230758	41702.2655746	30818.2585867	18593.2580846	5426.73049238	263077.893888	22279.7499897
PITX2	3677.39165685	5316.01176946	1626.3568741	8069.88901348	628.924253955	224.875250455	5138.077346	8111.41659036	1458.40080336	1280.87250808	1615.13157376	6473.67570436	5866.65075055	2471.94100728	7218.21791583	436.413453243	7690.38329966	518.896953386	3194.67028989	398.507780972	1712.3031119	3992.72121992	4671.02978081	2631.64663094	693.747721798	805.903931315	1012.25896216	6842.61715395	1933.99709956	67.5224051157	1230.95989278	2016.94328624	11484.7724026	11341.1777019	7769.53534013	1976.20700947	2997.36381852	10511.9199917	370.145739888	622.473866505	286.742713033	3207.65661482	8311.95040114	1781.49217732	3351.09650405	979.245463625	6044.35399521	3338.29536353	6611.71676551
NEUROG2	1481.10139307	237.896651034	0	0	580.489936409	184.495377468	357.915998308	10404.1155307	0	766907.955968	0	147.53405132	4559.87532389	190.1311206	34439.1371274	67210.8340182	3714.91248573	116.105694264	1367.48723878	77977.4480883	0	121.324651665	3998.893806	0	341.504672147	0	0	3578.87277718	3853.45710638	0	673.281177326	451.300781422	7281.02400607	398.772498495	0	0	425.620419792	8757.02228602	182.208165267	893.723136638	0	6813.50601281	0	0	0	7029.807791	1078.04251627	1053495.77836	6244.4589297
PRDM5	15541.7860692	10690.4510719	8292.56796757	9892.59385668	5068.34341416	1950.76188335	10493.1779292	11318.3820322	3234.73972449	2305.72382765	17595.9816695	9040.6268487	4310.02526761	6213.81346038	3349.79313303	5715.61500303	12583.0840903	2650.59405951	2053.85318055	5264.06851036	9529.26687598	11982.7630141	14804.8123628	5538.36696019	5539.44835568	13257.2816215	3464.01523243	16239.3434368	15143.0201054	1198.12005379	8372.84251542	6181.68735582	17531.1046525	20938.3635428	4293.09977782	21152.6499364	7364.1232326	19082.8294757	2189.29323298	10738.3882184	2001.26950022	31265.243593	14787.7734065	8243.61723602	12815.081964	20995.7193348	16528.0897735	11953.6967154	26874.1322392
ELF2	124033.1482	75508.7305381	132689.4808	112039.974904	114612.380619	171093.10304	167153.293978	120466.087688	86792.6518752	79578.4138517	142013.042587	108791.195797	52223.3926687	98344.7002061	78538.8487979	107659.484448	118961.082664	97062.5021714	48318.2685071	132469.363457	99881.2582531	143661.767299	93985.4644718	115142.183089	63093.0081268	130170.725697	170360.100267	107485.634835	115914.012878	104967.017978	109728.314492	83076.4073855	112216.664365	135893.305377	114486.31744	115659.131286	90099.583351	114270.096436	80129.0632883	124062.538162	122978.918223	173196.548321	125455.05655	130518.615097	112994.522007	137965.304221	115324.706446	98251.8760413	131850.220576
MAML3	73211.7703057	23820.5048147	23635.5926454	74238.518381	61216.6319657	136113.859063	61675.5995763	56311.3670089	66586.7235732	40772.0218095	51193.7534252	51920.3929012	75798.9965284	39625.8255458	33207.1994635	72970.4383642	77717.9158144	46313.1407535	12934.377658	80403.7376648	55732.9666121	56981.7525434	73975.9889021	60381.0056194	86099.4546719	41445.4155386	126360.508562	59805.3107116	78588.5235028	61305.5579586	44632.5072989	49089.2255921	61603.6419812	77061.562629	32580.7668593	80293.9875565	33131.3002684	84645.8415393	40589.4153621	57007.5880056	61874.399297	95310.2691418	52321.3189887	130940.340081	112893.47888	88043.8311539	47889.1638003	55915.1734949	105104.129309
SMARCA5	390637.887027	249941.115898	384954.455135	434751.195214	443318.468311	747165.045075	503627.848404	429683.23085	364145.581132	329069.487049	436644.661738	302321.305921	264410.882821	406670.943661	300099.066985	493867.308527	269135.446406	634747.518123	241225.278955	357948.956492	357128.628353	359965.770492	344420.750251	317466.724823	120855.693238	519343.1572	337880.719515	280322.663904	455032.608094	474911.874769	440406.808171	379492.072387	273780.481186	316994.959568	268477.862801	549837.620193	247537.299889	297418.635321	317713.476788	494140.50436	393037.303173	402500.785017	342990.429261	556819.068186	405790.465485	342990.592	292976.445447	316352.479533	360968.744837
SMAD1	188617.048123	63585.5572412	59144.6808909	152024.341068	98030.8688395	153369.746459	118770.03428	81898.5604324	81307.4095951	72755.4227628	102245.006485	95185.5945041	61684.6455412	70916.4599436	75686.5536569	97032.4240652	128089.871808	92397.6704566	14325.9412337	59431.1072969	196349.490522	128749.868548	84634.8496873	83139.7032203	68523.0703093	107410.802466	89153.1099521	97675.6066736	128017.722582	89719.3090634	130391.93611	54008.5158822	89791.2835031	133231.02395	39231.3710001	98743.4554695	80446.6621491	117886.376167	60532.3316425	127680.276634	76680.5394143	157354.330678	127312.449515	118648.570869	95292.6223029	110780.29515	99465.8472374	109656.090666	139729.022136
NR3C2	22045.2538363	15398.9742472	26087.7987974	61711.7671518	93702.895813	4598.11515596	10489.5155434	46720.3983693	11338.0067147	14803.3362545	45276.5499997	14656.6940716	9996.48163306	52979.8770416	8231.19379771	52478.8097551	35638.0665926	14548.69194	7100.2951001	19578.9138663	8388.32855259	10835.0424423	18730.0806349	11940.4732992	29375.4751812	24417.5732889	21006.075191	62888.3198901	69988.7633511	5177.4671796	91299.2765377	11638.1571197	40374.411138	32161.9948608	3658.11779779	8201.14764742	7022.61882394	53873.1524247	46861.7504097	61562.7391985	830.612091364	143605.327039	22874.6126701	7767.49876295	31405.5614401	103591.359479	102171.834367	13605.7737062	150453.995915
PLRG1	240995.414676	262929.277843	269038.898239	228913.348516	408344.720248	283048.905536	214541.423112	222195.474702	250596.997043	178315.206897	219333.049496	161120.304024	123651.343625	191449.159687	179580.941281	199761.932987	203848.346686	183648.991871	220358.082659	262128.773315	146646.110179	251530.560991	153794.330282	214110.484797	182609.528447	226417.344782	200074.274148	205496.962698	251552.412074	157483.646204	218434.836628	387379.01784	181973.091748	220005.370082	212448.290169	219327.223691	216952.387048	206983.847777	221519.080714	254285.865516	248584.771507	276782.951268	237038.331444	297628.879219	318337.323259	319059.710019	236537.943929	155107.674601	247707.701997
HMGB2	698477.928437	1240674.84242	1494453.17782	991015.743282	1419753.64013	1514881.97058	1203495.44633	640190.029258	1897392.51822	1320907.11401	1200056.27741	832886.872533	448328.749363	973235.437851	1502374.38564	853761.288925	737413.857673	2230291.89572	1901823.63755	831533.468228	759717.000681	715921.248663	237596.842341	660324.436054	729093.830724	971654.95521	446600.4466	608118.951884	392492.025462	1973421.54013	985190.753259	1174576.71838	496286.017468	401605.435805	1115867.70197	807424.451454	915048.728157	329195.832154	875616.735602	2496085.39849	2755152.86087	518391.257941	581019.192233	560761.321711	386994.035258	502220.180677	414023.490947	364386.733102	513541.779365
SAP30	108347.304433	239473.076796	356815.730504	184277.059449	714077.38185	240378.468227	230890.074001	118873.623697	321843.36956	239621.924575	158858.176308	126017.662922	82953.4591592	227956.266656	423124.825375	273838.578804	241210.527445	398099.422263	805553.58116	327133.376951	107039.729165	97114.3174251	61056.4057263	156330.33461	173363.035806	139830.399258	67525.0675251	161582.118732	146095.480466	227186.344632	75531.5643199	348342.1494	98198.5391421	115035.443353	111603.736981	130215.76671	256376.221659	134480.903712	169209.545186	161038.076214	214231.737111	104183.062382	102679.224476	202884.1728	85742.3737333	109269.08033	70602.4744486	130046.016283	87207.6821444
HAND2	11705.8605704	7252.2473657	33575.6750459	8138.49293778	52596.9126534	2694.98510142	7198.24302253	10625.8443751	2992.15670238	2698.65824453	6596.89177671	14054.8615122	7433.0230923	9056.44000581	4079.36553194	7211.73794162	16178.3723979	3686.94422081	7599.31380368	622.938155816	5474.93044557	12482.6591208	9523.88586607	13776.2094477	47824.263076	4409.19641844	3390.7281894	21526.1448399	11228.9527317	1688.79141748	9193.43852533	5302.50219705	36358.8135249	58123.3894977	19176.5654699	4185.31508958	9911.44395142	49548.7712221	96511.025184	6730.1709652	89.645916782	24383.8057736	15674.1541345	9746.75593767	7857.53494362	22833.4470966	11365.4600656	10154.6195974	20310.0326484
ING2	145689.41445	127432.861196	183298.922355	177515.241328	156715.321343	228428.048124	290837.286105	142281.830768	322026.543623	127941.894156	120313.345311	110498.348736	236212.094084	273217.086984	100164.668962	168578.577428	203136.962402	583392.113239	260437.51309	336112.994792	169286.095037	246531.436942	140693.373823	210420.959087	266730.23646	245352.323152	192083.642294	191775.142295	147232.358837	185244.119765	115538.543915	279383.033959	156840.962005	102327.372124	276832.639133	132363.489771	162914.921095	133102.579637	161014.902353	279092.043757	251505.894372	136159.011524	205196.684147	219241.412304	137527.002218	145277.576809	151801.842923	123584.564965	133833.890292
IRF2	333002.706055	312368.609626	476764.131128	424999.068294	282615.015435	318080.629174	396580.076952	376131.490203	352539.171202	205431.768886	230122.390287	301243.794697	334785.334104	581215.154128	222575.695296	362989.610816	337965.349917	433750.529193	151554.538055	384425.211719	220182.867073	277914.711795	277174.369644	356994.037238	305540.701142	417283.432083	356190.664278	335603.031676	280995.893367	349467.12667	363576.21122	491054.28278	299469.934025	265022.270066	431777.254646	352737.423206	215129.631743	278708.917458	510590.199744	448483.398009	353376.695102	345610.743557	353219.276716	282920.695691	435344.36825	303234.362276	278830.645672	385630.677295	381650.923566
TRIP13	75590.0250769	465210.108692	121395.489479	66783.9072393	178502.394741	164272.507467	110979.965357	88695.4008454	195000.605323	164312.634286	173988.834069	62932.721698	196948.99929	93439.5653656	389017.946976	77581.125015	44434.6963383	217946.49943	419261.888238	29405.2473664	98822.2553134	122523.03932	36447.0105423	42869.0732055	45084.2285277	89040.2449164	9489.05443287	23126.4842875	39608.343381	280898.876404	107266.551975	94804.7297993	52735.8922317	72498.2964181	151138.224393	166619.123602	176723.855077	21863.3171894	246865.602807	91206.5261878	138828.562594	15076.6896314	71033.098712	52277.596523	23661.3737666	33418.8373857	13989.5397026	56208.3074166	21516.4345445
NKD2	75925.1419846	83920.6205223	14662.5018961	97519.7384617	8282.99782399	58062.5818105	67621.725016	22290.7042191	97459.2134081	61609.3402802	18501.3335319	124087.489867	61450.0494688	45819.1616412	16250.3727429	91718.4838594	78530.3741639	68845.4851444	91059.0081343	2721.38684465	24677.2500432	127722.51898	37544.7701572	47764.4234752	142397.623367	22996.6502529	2398.26929602	99797.3179888	40070.689728	6587.23775383	43231.6527751	53305.5834245	76504.9137573	115382.092541	40690.87724	20274.2023679	81762.8382839	286983.431795	90275.1460065	29249.8168407	4363.87622425	19461.4994528	93830.7866662	17992.9801819	34608.4977108	32639.9597494	5127.52145868	146640.342994	25350.581479
IRX2	101876.394127	545516.63464	8115.92450735	162382.053795	165032.168196	58727.5937397	49506.7067881	177399.983277	120235.023841	657251.161653	396928.776591	332125.874809	77144.9427124	674346.09117	149901.52495	205025.393282	194395.247861	183064.472592	792026.867917	983720.225725	33078.8013433	129633.346715	48308.2974737	67597.1041563	265302.556852	79260.2289263	1313249.83571	769715.822626	155490.35684	146237.846085	53465.0712689	63745.301834	268034.278284	88800.7080341	104922.230011	170831.193967	271154.250333	250179.968171	119323.895293	183357.933497	5723.66926121	390892.46861	109402.803345	76785.9577048	640175.823939	491382.614937	58139.9415278	419924.911783	385442.794995
SUB1	585213.419237	533157.905302	412444.418442	303392.372263	426105.304964	303649.037826	331612.064218	298782.935439	558206.817827	485180.657594	268302.196596	312441.139097	438619.105518	1299219.80123	703000.234177	320301.250289	576657.803319	462291.819169	950995.673435	1021878.30013	1826916.88716	535000.673735	794735.861898	586102.299994	184784.720565	602388.609193	486663.185076	907417.49384	313132.505979	407721.616388	942265.113182	329983.299923	252336.714666	378334.167664	702533.719366	468448.301946	380873.596318	322726.654088	450452.68506	486935.372693	544118.371574	382073.533199	302673.900892	865086.545665	211971.347836	428015.127142	525197.640582	504549.387231	475506.804621
RAI14	239175.19272	251827.732844	222007.814071	150546.225096	144899.183889	91556.8451092	406810.030435	234328.889506	127753.619469	86984.7843915	236010.049808	337234.800827	144074.383081	173264.459532	249486.100715	158372.129902	158260.307127	114718.029577	138226.729062	121493.307904	249635.55631	360273.56101	309404.686719	136016.683309	85448.0053015	187112.379444	107799.249207	211012.23301	312714.476981	50582.2221438	228855.822172	354134.173248	201245.707959	852019.722154	253105.156153	137757.203722	209021.577257	151820.732637	565786.788342	190077.865166	173271.03793	132470.826092	97241.2516809	238385.987585	222164.839393	291193.114338	84160.6349407	536149.526718	124417.775128
DAB2	285357.994064	275242.695105	129103.37471	344402.299008	107406.083867	90107.3797835	336883.13447	804796.025978	156910.376184	156313.281389	249534.064207	360583.564296	159054.915602	301681.88921	228630.060625	297913.674294	842591.125513	202599.787449	129381.401884	48980.0765061	222890.21791	285739.26973	257945.928978	291377.141695	139363.246342	153979.782172	187704.347352	360302.264589	503422.892763	128401.968791	214348.031741	282005.354992	503866.223412	714396.254507	173748.123795	130153.660951	102128.365222	332070.149495	315785.993593	258922.126635	17903.9519282	510547.637261	292706.901748	461465.164893	1150589.07107	342025.662163	646961.714435	243109.916812	365241.078249
ZNF131	137534.730613	120939.857944	115915.450892	71881.6309568	227810.89887	93197.6146167	99707.9888783	89183.3643197	76998.6945167	95744.539874	109169.4372	97863.2723299	177276.86168	175902.878328	181855.270217	73599.8858007	86653.2065986	82254.3401481	144234.777126	93554.4824912	87715.8233686	155970.689631	100780.320916	84264.3710296	48836.7521276	113530.687178	91952.6518399	76889.4508352	82545.1971479	153042.123941	111967.762687	64538.1050243	81625.9897151	90224.7361636	86223.912283	123335.77294	97194.6077605	107003.593653	73692.5048606	70426.4686122	123993.387676	106592.505391	92004.7922724	86342.1536248	57858.499954	82365.4271901	68498.5126037	122018.100664	89082.6856544
ISL1	6660.15973414	1321.4737982	219.071115468	5465.77316952	0	146.405596208	94.6742873156	2119.82122097	356.060813763	0	101.761496594	117.075078199	120.615716698	3319.3120062	0	121.769174596	1684.54542577	1382.02839755	0	389.174236484	152.01807799	3273.40814162	1586.65338902	0	27235.4715866	98.3785832185	282.443030535	668.235460783	0	131.881893961	400.709763848	716.255993832	1019.61680421	7119.99855701	1198.0362987	0	225.166296568	3158.68241249	2024.26822884	1114.473726	0	1201.51810096	1288.45623101	1023.39260585	0	478.155162625	3593.00124421	352.444147295	300.319171708
ERCC8	53655.404493	19868.0269119	24228.0812026	30231.8063431	25381.15499	35256.05033	34620.0839833	33766.3698897	37790.562585	44561.0606179	39087.415935	30838.2084358	38153.6850875	54275.2368581	22891.4455732	39821.8111517	33303.91835	30240.2754232	43069.2884841	29310.7803334	34980.5923245	57417.3482138	41746.1371409	27292.8300509	20544.7082965	37261.5531142	30313.0074122	28607.7018887	35187.6813596	19682.4815798	41377.7956146	42481.7237423	29235.1388788	41112.1117881	44284.1705728	30353.7831521	34943.3749972	36060.2013793	28886.8547251	23976.2455648	35365.1199716	36537.2840275	42365.8338014	48436.8954421	35830.9585957	36675.7932846	57987.4332076	44217.4522093	38749.2898847
TAF9	341433.5766565	532898.4616695	266114.7213265	335943.639815	141753.406304	297846.359679	306896.430695	232799.6105685	440338.228497	164571.88775	288798.583666	313366.5263875	287482.834385	589313.671473	161685.720079	253705.311388	275380.1759535	404572.456588	451235.439799	420008.318566	268304.900777	421453.303197	343900.0948885	262345.201706	150648.14569455	301216.4450055	266918.6359175	228818.4063385	274763.135599	188988.498877	316747.879348	273289.290684	181426.3476055	242151.9710675	546955.9554195	350822.133182	286545.276659	203420.630475	206394.400017	255719.990813	313725.2427145	211128.5638205	276043.0994305	299024.605689	197736.9864015	258803.067433	267801.4058795	355856.684809	253189.3513515
GTF2H2	5162.21232813	752.516792412	2255.90728425	3124.56311535	8517.97836648	1799.42535108	4088.36658433	5744.49381003	11177.133076	8310.31736741	10512.7977087	14389.3313608	7812.91224381	50168.8223473	10987.4821237	6835.94405722	1771.98283434	10191.6470363	12075.7666039	4007.5616224	12801.1101365	14967.2332724	10606.995531	4328.10034236	3195.74136406	8104.50842039	2908.48608045	16759.1081313	2868.06814817	2540.90016908	12068.46422	6899.86669577	8956.65539521	3889.31881629	18770.6622376	14600.144438	3328.4177465	12013.9517129	2785.75199286	7942.61634696	7553.18512049	11089.866462	7233.20556668	7070.98706696	2249.16800464	7359.30543405	7729.5002287	13346.5675087	10025.904243
BDP1	137308.211872	42612.080271	49448.9802151	68253.1101045	62913.1097007	108504.912239	137939.538294	79998.0142704	54460.4692083	102090.099428	166235.685696	148302.115774	78741.559496	83916.9905717	93694.2794867	85787.5389197	81168.0838766	63757.1322153	43758.0521732	20202.511539	261175.113624	94490.4503734	142024.679937	74989.0598247	26659.9785395	171538.897243	85059.026841	66938.7785442	92208.7599656	49176.1452235	125024.689977	52369.7976654	85012.8513019	65121.3831782	55944.6151087	302400.537996	50642.1561066	73823.5843989	52742.1724367	91546.9010224	108972.108773	184571.023924	77993.0862055	103144.23178	129270.695949	93672.0676838	81165.0720724	135503.325018	93296.0246672
FOXD1	1071.82678789	7968.47317856	2953.89502846	894.224361339	129805.469131	1544.94237365	2553.12441375	1177.33550661	2713.62376901	2933.29184213	715.890886536	6726.24426081	707.108412377	1945.94328761	34586.3642496	713.870547572	1152.15688295	1404.36875353	3817.05856195	304.204000419	356.481774424	2370.56918043	1860.3478711	3083.40923309	12392.1180727	30336.7051293	496.745818145	2350.51415538	4850.80403131	618.525009595	48392.6324488	56477.1347911	2523.83043871	92015.5372687	35585.6097881	437.966977728	660.017561747	3518.37126817	48147.1362923	31836.406487	525.329448872	2213.79326029	1057.49861694	0	1058.51812358	747.51460737	1003.04444049	16942.8418766	704.247235852
BTF3	6651442.24425	2037339.01206	3060075.73988	10589975.4217	2320978.77176	4519060.8864	4322928.96521	3235375.77046	10116711.448	1633982.36026	3839225.32172	5099040.78415	3769088.01815	8966801.83201	1510547.1296	3636419.76174	4324505.33755	3555805.45839	8581453.44981	8079127.89792	4168585.01552	6316114.10463	5832229.78874	4337192.37419	6111720.30007	4220381.56286	4837316.1466	4080828.90593	3604657.68675	2550735.46257	4576627.4383	2291844.3987	2932844.6406	3142068.0941	5483050.99621	4277000.04462	4918526.10198	4105720.31471	2523739.44675	3943373.05872	4696191.97767	3780298.15479	3364726.30705	3778649.74424	4465679.22036	5839693.04326	3965360.51021	6150048.08006	4896835.56802
ANKRA2	166172.137066	59133.5563084	56392.8927266	150308.49924	95195.6922618	216127.696241	137297.869164	86704.2586665	135072.787831	83350.919159	225334.39699	141105.80572	112690.370493	180375.08451	44901.7131473	139108.482245	168888.507833	113842.965014	53809.9028452	166194.230508	211808.291664	157987.51043	178850.863853	171667.430695	92083.5432719	167514.493309	164085.910607	184147.623744	95531.2620206	79475.9277278	184439.41547	92382.7465711	159752.407099	76313.7934009	150627.270061	253307.428139	140938.943785	153034.420933	95127.1210596	90485.710327	226783.873542	191063.777815	207940.941979	157509.320642	137112.631208	131809.821404	91980.420039	245054.455378	143385.293413
JMY	88534.2745022	46873.5069976	81730.8492113	66282.0484694	140608.225767	81522.9818279	36271.539244	72580.1920441	59241.2422548	55644.1933464	103629.599981	121687.15263	49823.97547	84157.517963	72243.6481673	122529.713456	70471.174974	58116.70398	54821.9161072	13189.9449866	106137.283646	107986.628438	98615.719763	49796.8018071	42238.3719932	104699.945759	69408.8285329	65281.401712	73500.6694753	46449.0597575	128358.744427	37155.1261618	79802.4495777	115032.921807	42131.4289927	133860.927148	53431.5238958	95543.6104229	58344.9406814	109634.288271	89754.1224374	149931.041569	77535.596765	37348.8501007	94813.6996228	75541.9231257	100560.740651	110875.841637	97971.6400579
SSBP2	106932.29458	20395.3791303	35333.7208386	62365.0697951	41766.312657	60314.6683179	80810.7968254	48271.4049771	67250.1500056	77480.9173029	69082.7092346	81900.657403	50614.1985242	119189.010688	19084.2031049	43323.0852829	88773.4340264	118059.437008	61667.5059914	45060.1501649	197198.836919	98604.4495049	97536.3498296	54251.8705218	63919.980905	54423.9319768	23047.9670395	60673.6360848	65880.0387893	82187.5247152	133626.668376	26708.6553559	77169.980351	63202.6138403	111480.724621	129270.510134	85544.335717	72324.7856435	47638.780168	78742.6453063	101044.167888	122574.560273	51138.9237238	117333.703588	75658.2723645	120128.956053	81279.6670785	173776.484824	102092.070556
MEF2C	56335.4567161	81387.4667761	272516.38715	86021.5904979	20568.2644622	22087.4442705	55632.5900745	97097.9629195	27336.4230501	41666.8613261	58240.1063663	58581.6821617	52906.3045536	122923.683307	107365.881731	65081.8809167	67792.8852366	43925.8468389	19517.390286	19292.302622	69026.9545871	62337.5914491	67748.7585339	58753.8334389	37428.7816491	28521.7253151	118013.437686	100275.029831	161180.167172	31897.8521027	73361.0895936	58210.8438102	81899.6983245	162631.336803	74987.3341622	38070.0293343	18647.0453409	77415.5517584	74329.3397583	85808.040858	5201.84293177	183040.695533	74570.9885374	69724.493198	148679.893401	106707.640575	179399.730156	43710.2964807	180907.838098
ELL2	136552.829012	225256.544679	54762.8508251	100051.727097	49407.1493244	52873.635505	216707.039571	188151.262965	102744.183129	59096.4899454	131622.358697	209635.869433	228352.88417	393543.238463	140703.050267	195810.848948	128976.060452	77248.839032	94522.507039	369687.417035	355674.573939	162744.311761	317941.082808	127987.363292	126164.131559	90113.5603026	302132.927029	93090.0597491	305919.484796	41019.2367631	256915.67893	174276.124673	167442.549148	132658.06101	283281.023233	223842.266872	95378.0939892	174000.855054	137216.427889	109285.484291	105184.389772	162345.320512	140057.0416	422060.58452	839421.160267	172239.549015	261111.210919	160646.240857	177021.863365
CHD1	325086.169471	70426.1842364	73256.734525	151279.023339	109433.912384	512943.038985	288458.484291	101789.730883	123195.131108	61722.7773267	167446.149003	191965.393211	84863.6327102	161316.591696	67408.9709002	104605.776186	123964.756913	163843.745781	60679.0525348	55917.0206459	229006.648245	289087.200121	217940.969625	177977.280451	45161.0889401	331963.292032	125917.822574	90369.5783616	222669.548109	200511.679878	166674.555031	92957.4967792	112682.500701	79822.2990474	166456.259944	343094.162853	106134.162908	98996.5629876	94944.5775502	161676.960774	189971.198656	180369.165987	180810.07396	158506.110009	127729.856619	129789.82894	109655.774414	206418.80741	140106.907292
APC	136326.175957	38530.9769811	64633.4986263	63195.5448613	64315.7962513	67089.9643182	100257.497927	74596.0029363	51885.7885732	65165.4587789	112006.212561	95879.8775667	43451.8119406	65014.7559028	56128.1430127	110726.257046	62539.4937065	39104.3231622	27905.6437279	22480.0887423	123317.003765	120199.599587	127114.866995	93076.1687622	30481.172461	113114.540381	70505.2955857	61073.1220983	90928.9420738	52948.9478039	133091.925643	49656.4907505	57741.8576763	91455.859993	41771.5001797	99892.7804029	43792.2925565	70360.4886523	63377.4485485	77434.2436806	66872.5174194	148722.773592	73938.267964	132842.332771	84941.4207466	83709.1073441	113483.577186	107249.178995	95666.3824505
PRDM6	12639.4007153	7331.8475674	2903.59433748	59240.3077009	6152.77942937	8258.30907737	15116.2536204	6224.53015114	2579.13697687	14986.6729251	19102.189263	30529.3238034	4721.60865579	4883.11621875	5315.00159199	9308.32222184	7658.7362328	2783.13420671	21323.4771483	2639.0591754	12042.335604	11721.9726151	41111.8226292	74905.9185532	17040.4622225	6307.34031891	1088.23638235	12203.9449123	9869.06850963	1260.17028559	5475.73820825	3090.85527691	17425.1845424	43843.9273234	12616.9665889	5104.3685047	6628.1010664	15188.431478	2228.39611747	4684.36550074	3383.51494551	11745.3947603	8260.67185474	6214.28070095	11722.1825347	9334.33882176	12657.0262317	4617.01832956	8146.0692034
IRF1	140575.620732	427637.761098	632010.589557	290333.365623	53450.4772604	101062.399539	268128.264249	213235.351717	221180.558137	142611.322648	130148.791826	258887.509451	290518.179488	573435.727898	226827.338169	441564.567704	174662.492422	869257.78643	133635.143577	148798.857298	165325.770555	116658.856204	194402.804296	155707.871228	236138.98637	202129.830389	152801.281151	121122.154162	222942.008955	278325.111509	147878.669747	659585.900418	177716.284827	109570.094077	111638.170433	91010.0508707	133546.797419	86667.7409187	575507.655685	262377.32407	108653.575346	135579.321879	131221.180203	63647.5142422	226021.918017	167271.129951	186073.013457	344811.171439	114307.66104
AFF4	467481.999428	176797.349013	152601.270074	470393.887513	229704.994291	387467.043452	493774.621255	224371.663991	202880.816763	321832.050732	441251.919468	448426.960768	203485.408418	291451.871907	163398.550409	435652.402131	274716.225722	162841.252672	157105.787493	181290.773929	615697.195341	410690.196301	512039.467112	306504.256818	82996.8958867	492363.830518	283751.014033	247231.179138	330994.346389	210649.157721	768159.186654	214656.760403	274162.747079	283761.561013	223621.777027	616131.520399	196712.248725	296299.173364	174326.972609	299384.321687	312527.845272	438588.70335	270980.787745	556413.079117	361129.616261	293572.681541	293841.429337	538846.949349	312665.886477
TCF7	47835.6321303	56985.9288009	56968.852523	40663.3192115	9234.88362513	38701.3293047	58268.6510184	78444.7051102	35232.1166798	53612.0871114	23111.2362233	37385.726775	102664.243337	400520.529772	24164.0658072	63540.7356535	65009.676421	67762.1584126	22920.4953282	5275.67064943	20963.2219536	33418.7625727	10479.8472112	43409.2364773	40552.8738216	37839.2988364	16582.5466432	80523.0370763	100661.838711	21982.3776117	28422.61207	48770.285583	61712.2657013	41643.7093824	15211.3187423	43718.473322	17669.3450341	52921.0353471	95740.2058044	44366.0882132	11163.629268	49650.1031874	25756.7816628	19901.1674028	311364.689148	87003.5542276	30429.5953246	47996.2523557	61282.2115834
PCBD2	65290.3660443	21547.3125114	21658.804473	44495.4453407	25424.773841	49072.4772245	30477.4631336	19729.340354	43931.5786412	33660.4811525	60732.9243172	54439.2419888	40331.231387	58333.0550335	20920.8535996	28139.699858	49647.6168714	22402.4407033	45574.9304737	36651.5551123	63692.0980406	57730.3669933	92661.4927412	32667.7750571	20584.7167763	74133.7706132	36607.9016198	32965.9255197	19301.866664	23003.2478572	46326.9511695	14680.9006394	34967.9320046	11954.7223792	34185.5506224	55094.6700698	38866.9809025	35227.6119481	17491.2470037	20766.417413	45556.9273027	31629.0299032	51420.1302716	35659.5309423	28255.2083437	30170.5172296	33899.964711	69619.0478281	25527.4646326
PITX1	212569.196204	123194.350478	32728.0141754	152543.486567	157424.098094	209828.784039	58906.6597554	36083.196495	431393.586878	240980.206409	73340.0409957	271389.034475	978092.737478	55855.3895296	296614.275345	427103.767174	335664.267977	60125.1237859	1500478.00179	165157.29915	9234.00497201	167540.670498	193569.566892	214295.065515	61729.8145522	137523.956665	18779.2839459	10010.4945637	6053.69866962	433.020357045	151523.453476	343943.639396	65096.2037033	227283.855326	336816.764428	66330.8950427	527405.201526	234000.249168	41065.703672	164999.247669	151063.78719	1338.50201758	253619.12267	336.020221025	92.6316415469	35978.5316756	16010.5433641	470551.88518	40058.9507519
SMAD5	292851.654453	161194.342866	124201.369507	266102.217281	91388.6706352	244926.639761	249945.338055	150827.629072	140792.626838	287769.938307	265916.619222	239980.679326	168164.798097	233438.112606	146893.324562	238209.82776	152031.200083	104410.799755	112572.284721	102974.111007	290122.787539	295295.288335	251027.737377	176154.978867	90699.5213932	245740.691154	213305.487255	155314.392911	206853.493813	112825.824073	325401.858524	107045.188486	179932.355959	189015.915826	246268.490764	320582.016385	152050.062834	208840.322856	100012.316419	166733.851074	247029.366609	338597.236559	174394.157952	337877.795847	163077.925807	180829.905667	265392.602438	232270.890221	249727.963014
BRD8	291273.721341	354579.589991	178808.512101	258295.044221	142003.002914	434456.632784	185682.935641	130333.235066	140176.836903	264095.23801	253776.27484	242067.761495	207749.736113	267032.196943	145584.058892	147776.795975	268776.60223	339058.601175	184868.030192	229965.703857	222260.289837	232340.323915	226738.477731	264218.40575	151581.957247	234434.963049	217652.218788	222213.992074	121029.443337	159617.85791	203728.783066	99389.2614114	209498.211469	132152.221238	149540.355335	274656.43055	208926.489005	195735.650154	131057.269927	238616.322048	403724.851984	236880.16328	253018.754587	163586.766266	155875.769919	181040.112935	129047.717423	306986.505424	186038.861362
EGR1	5542798.18837	1718899.43277	859522.798857	6377572.23931	310248.254307	1510005.29779	803163.614262	5622501.07079	406477.345674	776606.308353	217200.412849	4539556.60857	2376141.1501	4069497.67519	213047.15095	667432.290236	1527135.53531	439679.166214	715086.226443	75297.5668699	1210334.12286	1121284.4025	726147.55996	633890.446627	7356482.84606	292472.003734	2068594.48415	3986113.96235	7255333.62343	2435175.63666	712976.659767	301118.65333	8450292.8677	3918255.46084	461208.978189	306238.383482	2819368.11909	2569121.28567	1085199.08364	5522261.35146	2467404.87182	19354163.8981	4418721.71958	679832.272323	1295840.29875	16387647.3228	12523837.7187	841921.678949	3429256.95686
MATR3	12878.747653975	11970.8562526	6488.01788178	9963.91981234	6897.4126704	8572.25942008	9407.757568165	5806.92831406	4538.91409966	9054.09205648	10910.505416855	11456.496287325	6395.822670735	6127.653723455	6134.50135181	5501.60573746	9365.208935675	4459.593647235	2533.08805714	3939.682378765	12288.42493536	11568.43424276	10607.798786705	7856.96254868	2145.78271811	11879.48435813	9492.160767985	8919.88631055	6761.851610105	4662.70308488	7608.218913545	5611.438843105	8713.5607849	5003.14396463	4922.99721368	12584.61421404	9315.935201995	9209.45621795	5085.503938525	7396.754976925	10770.87241874	11731.542082405	8151.343386155	9684.347289455	6644.638133055	8769.21566998	7010.587432135	15257.936990225	8815.491055655
PURA	120770.16773	56036.7172218	75701.3768512	89772.1021993	43726.081341	91694.6719786	100295.523593	72462.7164019	69098.9118711	62001.3043428	99283.2262524	112230.139628	52862.5080186	80613.9255382	85056.3758199	85020.2070596	65740.8195581	68382.8331631	32852.9129529	52497.8212522	111263.871467	112900.588732	123582.996865	116369.776131	33618.8437946	127465.024777	109991.985248	61323.8887169	78877.2877445	60233.193855	105612.054117	63824.8750462	84915.1453122	89627.514412	133745.881762	129665.709917	66197.7085368	76913.1779468	52529.0663613	83344.1592276	77517.9756231	199354.680313	73870.4472651	51508.9078278	150483.792515	83764.5176594	168021.11433	129291.669628	106902.534145
TAF7	642846.292839	1089537.91844	951913.555213	1568253.55419	826385.942468	1742772.53774	1006433.49888	675914.237772	1632144.84975	1332662.55064	833625.09763	1060556.51957	700973.63016	1780838.31862	697754.084671	834236.724627	1032452.61243	1461751.92968	908486.104383	1111577.28127	1596637.94563	929110.063776	1773341.25263	943803.432313	862479.142084	1352037.85998	679330.462658	860905.805872	934763.235514	605090.887164	1463878.75634	984555.414716	710203.065858	740010.238567	1189164.61186	910082.834208	771303.551857	795328.855444	1050880.67496	1190701.6006	1310346.53023	996086.05217	1293324.63662	1185182.74609	716508.604896	1126355.03784	1038889.26313	1097063.23893	1233914.09064
HDAC3	376283.050025	297117.711482	226178.177927	377883.201065	200001.868149	219125.012414	249519.593769	255096.195706	284960.29003	309147.363854	270668.177549	282110.337601	259115.793252	320183.516798	211515.450498	278492.754774	292574.063598	319259.721109	596652.163438	343511.742339	252926.667113	356318.503086	357877.492098	265200.976869	431914.328503	251507.067942	232898.095131	261368.951593	206532.956447	179741.551347	309721.045119	324614.532083	277433.18465	236712.422863	156321.445727	248189.925035	346814.928764	246011.841396	260680.000924	170932.979282	400887.228753	220689.560876	330840.058717	201829.065557	243483.33994	303818.200267	204862.437642	353459.621762	246330.202132
RNF14	389420.472151	227359.360671	256305.25405	503332.659787	142687.615747	338094.234884	291672.400082	206968.987535	363181.31606	370870.218681	419302.665852	307302.571672	229675.107831	399865.609929	178241.204911	298231.094828	246215.156879	410946.314906	339741.811901	342305.078727	489816.787613	482052.448464	489698.48041	331237.584959	168200.672329	371479.029486	309228.903574	251013.733444	244076.797704	263627.27813	421613.952025	198063.668932	227708.195091	253829.130386	288709.211061	521819.635871	325570.688853	254827.321176	193857.50383	316173.536705	347283.374187	317620.272268	298585.456982	390160.561095	232949.762398	275498.104903	465905.634729	408986.167489	327845.79949
NR3C1	194911.744783	133585.350124	156223.09484	184445.051451	26198.4373862	33168.2740169	144427.93745	227590.47177	88944.938496	76455.9440139	184017.337982	124487.212195	62875.3214212	228792.953139	131569.020372	198809.180454	119271.889226	117104.656417	39894.3379705	10271.959503	96512.6015699	90634.3825947	207242.565224	94163.0797119	87707.3507147	159383.515936	134409.532578	186926.739626	277514.205223	57518.1053569	142446.059048	113148.885084	186924.584385	244752.512106	59352.6061158	497455.582185	29821.5968075	239493.215285	166965.713239	274610.117145	258230.839647	514907.39703	185423.629837	136183.853798	392282.609995	266634.026869	752386.346922	168995.354732	437761.294966
TCERG1	168832.697896	205165.577237	109731.374227	118383.784717	150471.309608	169279.950107	172716.060245	103171.375921	124590.884399	154581.356848	187765.703068	133430.818628	155736.400106	151347.143016	140636.215859	109582.782785	122290.767936	142060.84641	141854.713139	71950.2505849	190299.453913	215600.853564	143291.53882	99507.5483315	63546.479264	175471.829857	118681.206586	125642.453403	127191.449784	79951.0296672	129081.88609	148825.444188	150212.803658	99687.0611218	107510.169798	176249.625804	181482.743054	116742.748813	133228.628192	121903.525222	201861.216727	172009.061869	139814.534592	134710.599155	101405.677893	149654.371674	97329.152254	186153.686012	125050.435478
PPARGC1B	5431.27966818	32925.3099475	25618.9638722	6281.30924455	46041.4676547	6023.51856635	10436.4721041	23799.550902	3741.9397523	22862.1961669	4619.06715311	8455.5474625	21117.3985566	17880.3501118	45418.8819435	26302.0283425	13936.6759975	8405.44331565	10130.4025452	4873.11726081	6985.24778552	4133.3028043	22328.8473341	5559.48390856	18451.466436	4311.5297587	5178.68467283	9973.68255218	10175.811886	6399.11127255	7645.80800395	9489.23881781	12944.6445013	12453.3102579	5089.7720261	3146.01804981	3977.45457911	9888.00667073	13223.2461985	6207.29613177	1252.28856518	25273.3498935	8498.9727911	3684.19750095	9083.92347347	16999.6792157	40820.3989672	7762.49415794	15612.7989596
TCOF1	125176.677319	598872.186762	154369.865916	110601.788881	140707.679188	104344.143372	101950.289194	153957.652522	130613.859664	145343.58512	116629.340294	125264.873353	152200.778409	149248.664449	216633.64507	113297.395769	109052.832564	198243.832757	147526.143255	97262.3644491	99292.849225	125596.886595	96878.6917104	77770.8195057	141065.805484	91684.9839706	115517.671822	87558.250143	108939.161477	77411.9588097	98984.8100812	160977.804259	119247.189798	101646.996719	117560.95011	122021.193411	214967.169749	113932.789582	146022.185876	91289.6082432	197673.348055	84830.2279139	111979.413436	109419.779911	90895.9029811	99828.0969132	109785.926625	176886.086171	79621.9939124
ZNF300	12371.9851499	200310.382418	28197.3480144	7225.35716674	69122.8711454	44384.6272313	42743.197816	36229.216494	6862.82800392	47402.1557676	12167.2237299	31974.0505337	5910.47090554	18434.1841342	6518.81498289	31267.0444675	53930.658793	4575.05394049	9571.63562768	1186.6093927	17282.294612	25350.3060027	20603.742793	20462.3071708	12482.8822391	26417.9615914	22052.3911297	25650.4098008	38665.765484	20249.2972848	48347.6482153	58380.2220209	33827.320154	39179.9178007	52966.5491129	47834.612316	29791.0171183	31472.6074292	48935.8010234	16085.7139514	58181.3380943	56073.6983346	16079.0340929	23737.0938328	8036.7346607	47590.5488294	19674.6791798	30166.0549213	28353.574867
HAND1	0	0	0	210.779006537	0	0	0	185.007714822	0	9559.50521444	0	0	0	0	539.497414998	0	0	0	0	0	126.040305169	0	0	0	224.68963901	0	702.532348102	0	0	0	0	3860.07581486	187.861886571	0	0	0	0	0	0	0	4829.22244225	142.313626786	0	0	0	0	0	0	0
CNOT8	517620.649664	253206.965199	353193.754728	840796.920744	396810.316167	532848.047584	651510.575591	395752.027033	290355.72493	483779.623027	387378.881135	473233.07609	361147.578938	671718.106321	276681.272161	439075.289759	494648.047105	546337.323771	322691.670297	482221.472269	773837.891469	489772.460907	484253.225385	784024.449922	291740.228975	558324.694054	475558.745279	350868.165942	336896.201937	243137.459707	606416.347284	268142.368891	305817.066811	383825.937026	440744.242778	1070222.57041	300521.950487	343748.87801	348212.692851	359232.031015	406681.119412	444962.203387	459016.827152	426277.133421	393172.079817	375075.535234	479044.019854	644338.390084	476476.387192
PTTG1	147890.798631	225682.141164	296392.445239	200910.402559	293918.71301	173555.433983	132562.626692	214841.472551	597960.358746	264736.890463	167253.638796	166107.144556	231570.31222	265045.33231	449648.00216	259586.594837	151538.515378	575125.201854	1327959.35101	72618.9200982	205346.518169	177674.196524	93703.5874418	122534.847238	244626.854083	170426.111759	44076.5468088	38268.3476995	72880.3472092	222801.127525	264281.592228	279181.321924	86451.371124	173292.205317	494555.494308	145818.128161	370563.433722	26907.4864089	317345.525777	371336.223301	422401.673442	10321.2374574	92233.7520561	123954.654574	62687.0944196	55222.131022	9308.33213305	85528.3723345	30957.4910114
TLX3	0	6559.44644103	0	0	75582.2780899	282.612811969	0	1076.83659866	343.659499419	0	0	0	232.829534846	0	1674.74258945	235.056102603	0	0	0	0	0	0	0	0	261.561013128	0	0	0	0	0	515.671149546	25578.446633	0	610.845749537	0	0	0	0	0	195.574089895	0	0	0	0	0	615.335199235	0	0	289.859294327
NPM1	5172453.12062	2419603.33514	3534016.20482	7641717.77685	2091020.18503	3271695.56764	2632501.80689	3281540.31724	5377727.66679	1668861.3516	2759772.9573	3179572.74574	2674760.96282	7578398.58792	2868460.21363	2361685.8482	2867301.23541	4370138.47154	5193614.72153	3082837.74995	3276485.8236	4868763.02541	3355862.53484	2189398.64163	1784535.47449	3086875.12573	2753632.06398	2343550.7265	2681531.89535	5578729.93292	3002155.93291	2625878.85987	1806859.9437	3045931.7454	4346442.41291	2725897.54529	5086584.93006	2245747.85889	2454213.32747	3691549.23099	4043282.50179	2135029.10587	2754635.7463	2765194.4697	2610673.46421	3717500.66838	1991450.93044	2157792.70437	2824018.53768
NKX2-5	359.469265198	17408.1499242	452.265726919	874.722811275	14370.4987186	0	1303.01478531	153.554636275	0	449.111208918	280.111397502	0	2656.08019503	0	149.259233885	335.185063215	3670.89853646	126.806935426	91851.845214	0	0	265.013828422	272.966515471	329.036202784	559.470763037	0	0	919.701336188	742.69816301	40476.9087404	551.502167817	2218.03342502	155.923571567	435.526601747	0	171.366257761	154.94968164	0	0	4880.47949735	206422.737889	236.237901962	5142.62630734	0	0	438.727532215	0	0	1239.9997892
MSX2	62837.9196172	8149.06070092	3476.66825319	228514.89926	2144.40313219	73607.3161211	102890.180358	155389.039194	329774.898683	80234.212089	78422.430107	49050.8475206	8422.37764487	38885.66704	8261.2027072	184436.097839	276605.822	245413.98696	40987.417896	156134.646369	445064.197519	323306.947249	141513.056594	219600.356187	73113.2166762	46963.0752821	60601.8227164	159922.287101	93403.9458029	18418.1489091	105140.122531	11821.6947422	77239.0422503	121130.308491	305220.242135	29244.7465172	159230.661479	181264.399391	3855.02711599	103033.341448	49062.1834734	111249.007094	208404.560036	149289.898505	15473.4832136	97535.5083887	15640.069859	140727.532257	92271.2794681
NSD1	295125.728944	119900.926639	127664.389623	197852.038761	143686.213929	177557.349031	198041.850684	187310.321666	103040.873867	146106.76077	214598.759343	188672.656428	198529.338902	131886.793204	153588.162958	252371.064254	159816.688321	135937.517312	99771.6383652	76701.3005212	271731.436727	190252.822354	226075.427703	150552.455297	104634.907504	344019.797861	94206.6287821	145904.77608	148936.368493	181189.317102	212199.016361	198373.563626	146157.75563	152816.517922	110885.482876	208307.615163	134494.656445	164513.203073	137736.868694	166474.969813	209548.030377	204273.032231	235609.649164	176922.478097	145992.754411	141704.042037	173984.632414	133382.212377	138612.646689
MXD3	18109.8858216	59642.8690564	24071.1720244	37386.81382	37778.7746223	54932.5500328	26681.6168425	19839.1159989	28770.1144413	36189.4404687	26573.5715361	28739.4557212	47346.7939189	17717.1659469	20557.6358792	55085.265386	87994.7284799	43328.2617114	109223.864322	28507.8811778	22186.3217501	13620.445872	11478.4167504	28808.6708886	100014.354333	16668.3555066	14451.1203883	46520.9347009	10661.7678861	58996.2931154	20091.4144419	47360.7946841	41367.3040621	5839.30136475	48568.8192535	22140.3609067	95375.2269175	21725.0425625	33876.8958075	25890.6474795	106227.037055	13389.2437438	39121.8210278	13047.4813297	39060.3764568	17290.1550036	7079.77335541	46904.7496577	13182.6364862
ZNF354A	111747.126087	66647.146376	83017.6942575	102056.37695	106314.555262	157780.421769	116936.269733	121110.683162	102198.877623	64887.1973305	144100.632796	100410.213505	106513.705279	145484.307632	69785.2507388	106341.47056	104060.169017	137136.859883	143531.288892	72565.9185093	119749.752008	178137.853089	66333.3641402	103338.58141	44656.2842573	142292.686339	93498.2271935	82340.5766356	126654.356567	105757.912143	85689.2516517	135538.626166	95613.4769245	108467.405081	128877.321824	162190.748923	119458.475463	99929.5859378	102374.65	134453.10543	194324.300914	130007.240623	123987.701529	98881.0478509	69526.5377967	123448.727239	75462.0250326	69278.7752064	95010.4080084
ZNF354B	62426.2953205	58179.1802684	26938.1527372	42690.1120371	29147.7670834	71223.628692	65775.3524329	38156.4844587	22438.8575338	27753.3960293	72889.0192341	67482.0750738	43753.0778367	43367.0326485	25503.9849977	41176.8146458	67320.7241833	48220.9240574	43784.2064113	23528.6786927	61336.2541073	67036.6259711	40087.6440888	41891.3099647	17078.3299164	69331.8211889	69027.2690273	46734.0715776	42163.4698462	40339.5413658	42600.9687871	42523.545349	66955.078497	48396.4128287	20409.5334005	111192.847104	50876.0545101	58989.5311789	35114.7688995	43214.8331995	80144.190676	125781.185588	58918.1829434	43494.0765865	41455.9449278	52059.4089726	49046.6798159	46317.9278822	81935.8794042
ZFP2	38049.7060268	10918.4744296	4064.05536965	30100.1360089	25301.609639	29077.3377301	15083.7899365	12540.3146767	21176.113577	9020.99636905	40199.2204516	33472.7445463	10661.4063376	17287.8215242	4970.48508207	9301.67106514	28186.741914	12467.3160262	20723.3086006	19252.5079311	20238.6082141	69341.1040196	8657.20383787	20349.1636021	11829.1735736	23725.6660283	38989.4369448	28986.2628813	20806.7973059	25329.3134562	5684.58614628	16609.3554344	24725.7825718	12431.5552238	11548.3562086	24864.7833043	38208.4441399	36365.0339341	8835.95764563	23770.6569427	57326.8496137	56754.5234807	23199.5301603	36630.4027541	11329.4705791	37394.835721	30620.1628545	15768.8395807	39654.6392261
MAML1	199096.373559	122657.421385	120484.605028	190192.069145	96122.2913989	146672.824083	161975.147305	158064.603455	101896.777556	104395.459384	133030.719767	194397.614771	159434.412681	149241.422203	94407.8756459	166868.262218	152897.053827	142131.334122	70360.1606435	130486.129029	180779.244198	192827.011667	163163.015171	148048.377402	126651.096777	179584.830426	134359.629215	138448.948414	178022.318014	97456.426382	127403.913889	183542.507989	155310.816726	161582.243357	130164.122262	166798.938213	124413.520311	172571.407647	118425.182854	150967.299	200121.108451	174735.253647	158016.296277	141732.064045	119352.300046	134194.850235	114164.097398	168277.145142	140717.820793
CNOT6	344019.618947	157124.272247	141831.383479	445986.230996	139557.883715	247872.677115	232002.316709	214866.768933	217277.596631	186916.866498	369378.935965	225520.873425	246697.563328	214774.001861	146166.17281	265202.279748	164261.2539	297304.231977	180803.832709	151283.753343	426175.341567	327393.761967	165332.908878	297894.419993	75422.027602	372597.456729	140528.230416	179105.062445	144123.363932	109304.338482	298852.375898	242829.868293	139108.731941	192064.057171	261078.776982	248616.949034	191693.271847	241267.078578	153181.762689	272573.266091	271054.760585	199345.045618	249209.268014	346800.623184	167849.336184	135098.169709	101449.431614	162556.059863	161315.763648
ZFP62	283013.055995	148300.135622	132680.992641	289523.371604	139284.712899	281394.486116	221232.537631	168394.665612	144132.857487	82533.9490889	274968.680386	275587.983504	171778.047109	299003.815329	76480.2607389	160961.905	202526.818476	401052.720686	182564.596664	140389.312659	232367.510199	375644.883495	205307.306223	194371.727762	88765.0953872	257180.743749	149243.179979	153146.050054	101902.010286	135569.496483	242507.474084	103778.10397	122915.476531	116470.83378	177147.997451	337722.594191	187473.608741	170700.857159	125400.243845	147909.277834	306431.914745	199251.894882	214200.000159	196908.930358	129254.974675	161981.090021	91405.5733432	235603.244137	143325.30325
IRF4	11996.6924864	307641.955315	29009.7254569	18571.3530172	3976.58899526	7082.42656811	29468.6801593	43722.9253145	15223.7429147	21632.1137498	15166.051733	21967.7151817	70312.6641507	108080.805958	118649.85474	87526.4356909	7751.2033829	61048.4449124	2386.14698506	824.053461292	17270.5990892	3246.08240194	10902.6936049	61914.3707314	38600.8266337	18123.0430599	18217.7191333	37713.8362269	20655.2695284	26099.3329011	4242.39629601	43048.9525652	26018.4572168	22034.4117206	1268.3855535	24640.6548354	3520.80985668	9415.10148322	172957.996112	15941.2447305	820.994268393	47136.5509817	28709.373875	5700.80694922	11083.6162068	20249.3063444	18309.2854663	13863.5799621	32504.6875905
FOXQ1	12947.8104484	121503.599108	56141.6038506	3844.90404695	3612.46390358	3444.41574098	21955.381256	9374.44339242	31114.1095007	6031.96943802	6498.25776152	20461.0373402	19863.6854585	11155.9850751	5285.08235388	8799.04765656	5189.8405333	8360.82858908	6382.53737773	0	5109.22566492	19738.3535624	12831.6545252	5825.37972311	550585.78012	5455.62305282	0	13194.6306275	3022.75987044	664.869303317	24690.5751866	7221.86509932	9899.82849023	40148.9499454	6710.86610857	12763.4388157	7189.30382944	26540.2994542	8261.30758883	10045.2098289	9976.20533854	9518.66559846	6495.62249174	2923.62083561	12895.4047557	22766.5053816	1150.07964302	9476.32916622	9084.1733828
FOXF2	52660.0284054	37067.3875154	17321.3430666	26465.8245593	26911.7824184	11190.0200456	55892.7209088	32639.5229337	24164.4326297	17343.86579	31379.392851	56157.922558	19232.443511	39168.4887718	50590.8952252	26155.9296174	47727.2465555	24525.7485149	21092.7246902	4273.73932917	24239.6196583	56838.7408798	39073.1534374	36230.0905315	23212.7924271	17760.9554305	11538.1916937	38746.045867	33185.3975717	6604.10493784	36435.4559759	14394.0599254	54044.0937849	177853.172511	68675.9106811	21494.3592279	20622.1234734	81792.5428927	11622.9147288	33378.1568602	1328.45656927	36077.6431595	41598.8139075	22117.2596419	16952.988137	32555.5087176	19615.6416479	28331.2235861	33243.5608781
FOXC1	40071.3922661	860866.176607	734606.718652	72594.9527753	799276.041439	18163.0200911	54486.8609522	119084.084502	30842.5209631	8463.79014911	19870.5003635	24579.5637686	17885.4121487	71327.1620201	952135.526143	20827.4914306	85324.8431679	21913.6337702	12745.5662357	7999.1859876	33868.6287781	21485.1557363	26861.6155085	32817.9669419	165812.826761	11771.5011524	51522.9756187	75420.3118795	251543.127961	13263.2337545	72753.8962677	623192.064416	102625.034446	133918.439605	39868.6299329	29979.5796104	24876.1728578	49504.8242277	182775.024801	97876.1143495	13320.4333433	221384.759782	34995.7314666	19908.1924315	384791.626636	167546.08863	163779.42629	41654.3018933	216710.650882
PRPF4B	286715.000357	369682.132903	223776.754108	229197.589006	217575.221291	278913.745052	333955.543535	229036.773126	370368.169986	335697.227905	350222.827641	301604.260971	237920.647847	201563.204817	294254.846133	246849.404738	246531.833384	210088.902947	153307.995564	191857.038772	620799.198134	265147.701039	228593.114838	236227.939096	79354.296524	225227.069689	278204.120932	242845.388293	226516.986036	231174.410985	291687.03343	174340.983285	225133.598812	262782.475931	236948.479943	336147.986754	232356.14665	220024.958556	191467.117584	317033.81189	286955.746924	380343.172456	277070.519786	319148.063817	244077.456686	254485.303474	192997.237053	222884.665231	237883.049011
RREB1	96479.6215538	57642.2454846	66232.0011678	119259.162592	84201.6678419	72190.1947521	77029.0172151	87439.5312406	113625.394708	89516.2922559	92127.0054398	100476.093001	94126.2850985	61844.9349647	73001.7276049	125739.157393	116020.666076	45307.2493261	59181.073512	93477.513333	142653.080683	115480.950741	92162.317121	116943.421617	80958.4090489	72713.9976237	96879.0235047	122779.648648	93771.6909004	41612.2612235	94619.6038143	78931.7716786	102129.469455	100771.652387	135342.736051	63370.1376847	85093.4546152	113646.44212	71416.0014326	74004.9567752	106008.432011	114366.938855	90110.793448	100974.899233	89874.5321937	86337.3522754	155353.736686	104965.318764	95385.7656321
TFAP2A	254850.455095	321624.673113	304692.928692	325190.771607	395295.341372	335608.078544	263155.06442	161220.188012	830392.722116	252684.727706	418483.879856	264731.075593	213037.725395	134852.636117	319106.864693	430022.353458	290143.386796	294872.864257	367650.022214	453537.283031	631562.02737	372236.494859	106796.518662	312244.421825	675590.429696	78232.1527958	441307.900374	364907.986136	135872.597905	64031.0668226	31795.0197023	143082.928559	204139.224733	478505.814161	736333.40339	343869.290065	362558.237368	350718.066673	103558.391941	496156.403656	754161.491358	306708.943143	291346.723092	570995.77897	252412.954339	227027.529943	9449.27473826	456438.040076	179507.452807
HIVEP1	112268.253044	82955.8774834	81026.5418784	89756.6469573	124587.888326	68638.9013471	192653.542848	103793.591331	55004.9581572	60131.8961448	90021.1543702	105073.874978	60980.5554586	55130.9939844	114867.888904	106569.799599	76131.2550373	41744.3488044	35393.4631478	16209.1772531	136115.677176	100054.801422	62422.6858722	57610.3160873	31727.4295108	71094.8212523	61908.2502678	57710.7352887	117194.374236	63249.1821486	74682.6061554	82351.8900728	90674.0659956	127549.394032	60119.2197673	91842.8865964	59431.49446	80967.2522911	94015.0153214	110796.899184	47897.3993601	94327.0895348	57429.9644458	88383.1272634	76782.5271406	92003.429272	74914.4008653	74337.4014133	84431.3473372
SIRT5	67299.4144701	90422.3328167	103672.250087	44826.1819937	116601.374122	98427.1964502	40590.1977843	64009.7205087	50771.6827243	57147.7049575	80732.6345375	49185.839212	49115.0482635	54940.3176507	93614.1623283	56926.3107553	44668.7952411	96108.8354087	82820.3899646	70763.4163752	100127.31408	59013.5151545	53666.8122298	75214.7914949	78452.2359365	55876.9118718	67439.2173645	63950.011555	43293.5196487	162117.684818	56179.6020334	95963.7949165	59630.4756345	52390.7480664	73281.6439777	82873.6099549	81452.851674	52975.5040816	94993.015367	58805.6511649	105425.369323	70140.8883229	54377.5164629	51172.8586601	44170.3286169	59639.7014629	89319.0174024	74625.0596684	68617.9195984
JARID2	120574.238723	164894.256922	160543.580937	167362.526005	211515.316882	161410.818944	238603.128377	183838.367639	163436.116396	284398.721066	142225.758769	272676.946745	179384.105421	134822.562393	345440.508745	210154.849176	127391.30899	157510.27812	103988.140153	141777.220344	446237.454921	122427.929436	109329.420091	198682.233927	166656.806518	116239.031002	153124.176399	149681.965844	120055.830701	212505.604101	135291.962888	168932.16149	124684.8867	213404.776552	147714.921204	120210.224715	123204.858285	141430.674565	168069.599242	212816.864086	128642.963651	130147.053835	137606.225802	172551.955901	121116.294825	139064.373975	64270.6186539	138641.039183	106121.511469
DEK	533779.711831	1108350.07794	1532658.54638	756776.479128	955070.512936	502149.373474	832944.119291	667786.895097	594852.29227	945973.824703	781039.857327	666774.27538	464628.501356	519482.6043	1606032.30003	607966.599578	428320.878947	833560.345081	712477.627503	368808.67105	1329216.72306	550548.818213	337568.194378	480531.758988	192882.324343	449443.403386	626039.607924	463468.103778	556085.92538	938399.522878	754361.383459	1110818.19712	427652.055265	711442.141529	636288.13098	613263.369361	484799.713584	381270.785024	1185918.07567	746886.506846	630085.031685	761703.909526	348087.5154	787029.840212	744500.809429	668429.413127	487443.165552	372548.172435	608404.290059
ID4	185131.42565	135553.186985	646446.711377	362426.768382	401370.322837	26101.2946242	134679.585974	539518.014113	33928.3118848	13106.2300063	55051.9277308	93421.2174123	77709.0425149	213890.291533	633764.768066	37279.757481	305154.733126	13027.4650683	31020.9287866	12600.4567426	60465.2553746	56582.9396992	66449.9949766	73044.7736538	664734.327847	26731.8617665	132483.494258	383075.813271	537423.234731	11837.0751463	142713.420612	373616.879997	401165.273685	918801.523308	177252.468891	55877.5360364	168322.949727	386230.991377	143288.53226	255243.961655	49028.2085726	867487.647719	195963.748766	51715.4687888	534464.496267	866568.108099	425358.967627	135851.430968	878628.195343
E2F3	87021.4947465	254440.004417	190973.844958	83709.143642	240716.084505	127546.434746	98911.2366758	137919.955367	151520.631248	154493.73405	81383.6977833	133748.845542	124869.265917	80667.509325	232535.365409	130140.923252	73643.9504589	94510.259968	61622.2612917	25846.3241278	149064.676423	117403.332729	92202.9509815	77452.6626471	27072.5778758	80984.205719	31289.5355498	65637.1822704	113739.535059	60059.6887318	83042.7272723	244440.111723	87822.2306075	135368.398075	157236.541594	76507.3352189	92740.0849791	81884.0704898	244183.711042	86116.1876437	169909.183604	71797.8861246	107862.050478	46263.1325898	97052.4704955	84771.1818544	59488.6156168	121952.226985	66539.7718021
SOX4	762698.983096	1183823.38036	1221397.58762	965203.146195	2098126.25889	1158516.66598	597418.894824	780529.999819	1548370.82574	1337498.77442	791460.953338	1263890.47974	579436.707375	498816.972537	1523909.27815	1211281.53857	605993.168022	608989.407968	1117402.19624	661343.448289	1703418.76198	938160.774285	528461.167873	1385127.97368	217714.160496	387856.900187	345230.391376	449618.420926	587600.547518	177342.040373	463898.814925	939514.125578	427451.773179	1344920.36352	2952227.96605	215022.448948	574453.791988	1172649.85962	1221072.33262	923236.053655	584774.50285	571281.387873	1151887.79813	839356.530965	370309.386071	502997.928892	169141.167393	444941.369904	381651.208406
HIST1H2BB	0	0	1121.42620742	650.681906504	0	0	484.63818125	0	911.338601478	3340.81304253	0	599.307949146	0	0	1110.29781796	1246.67410723	0	1886.56286169	1388.74037082	0	389.090675637	492.840991754	1015.26089413	0	0	503.600491716	722.913689166	0	0	675.104117933	1367.49027757	10999.5547472	0	809.94023451	5110.62849743	1912.1187056	0	808.465605044	740.159989282	1555.90825691	573.383563645	0	1319.12286244	2095.50088103	577.67263494	0	0	0	0
HIST1H2BC	44676.3402225	168961.675056	154055.589086	36896.9409142	9550.93873789	33896.9330864	185499.62213	46650.7822681	794233.776652	234170.030747	18989.1345227	402950.520225	148382.206723	58915.7981149	137161.719288	120345.906114	32986.6581095	85008.9975815	188434.084632	85173.4725875	1156227.26353	119770.997852	851562.248344	10326.7657169	35586.0971674	300865.063549	57097.1793993	51956.5089383	21133.9482069	17773.6943854	334175.927471	542669.979614	27404.4090171	41553.6244055	467817.373205	666480.361956	17896.1308565	28379.6631334	495655.147931	119037.553372	53028.3544934	19277.1827554	134908.782962	289990.68847	23787.7833354	13218.6396037	14781.0745486	569376.900714	16085.8006227
HIST1H2BD	347845.325067	869511.986398	840125.906531	306189.539526	177315.5718	1069627.51966	2365128.91519	311206.766071	3593352.65104	1014939.76944	190579.304687	1162535.63316	1602778.2021	697425.180619	443525.09873	908572.79733	381811.600825	1735267.4513	1157979.87269	1614795.16364	1462985.85428	1076428.66518	1009309.20397	324724.732999	544742.101043	1294589.1901	624285.354481	373120.50908	111298.990155	457322.195269	1386433.39347	277287.283105	251906.613495	119888.822749	1915986.94552	3013687.14529	713002.650105	319295.647389	1984994.37071	850163.038709	1000318.64541	205596.951031	688948.641351	1215322.54555	155333.584941	51683.2114471	53215.9412315	2326531.96882	79993.5110854
HIST1H2BG	63627.7798887	340151.992406	195853.420581	58426.4614612	74813.1479873	199866.755496	406448.342113	104104.165705	1553162.25636	264982.77612	19645.3247109	538.134569967	444081.676101	76285.9425986	176961.462031	190301.720579	37424.491652	182104.46698	57361.400516	104348.764578	420297.981836	154887.268621	912085.612978	66482.6306573	55431.3281362	404715.683841	149298.394912	62198.653284	3307.19819956	58800.8149672	95162.710584	226343.176998	23954.0384491	41454.2138208	44971.9005928	28615.7052434	74518.1933064	23230.169602	523712.182273	114095.802986	88555.2962825	35897.9881742	80544.337585	466638.301455	67950.7015067	5128.28402488	0	349111.385972	16564.9732605
HMGN4	952727.577815	1509643.78385	2363398.69022	973344.031971	1307434.05126	1227404.30155	1074914.17178	857869.737061	553357.073184	701269.174176	925179.58302	1152862.92306	841478.103766	1188102.65876	1114037.88318	513736.883526	707841.624485	1086937.49161	542515.677107	883604.932047	1230439.09619	1028205.18628	791434.91547	578674.98841	605383.375498	683224.588608	732856.305855	849930.728189	953796.99912	1940097.15104	975666.207941	1322156.84126	680686.432287	847208.292977	458468.304821	1077086.16084	856749.628419	760277.501288	1799310.92377	895916.155633	1152403.74876	938304.125471	796879.636199	1029055.0034	1269008.48214	1162430.98066	870853.575841	770578.184784	1135909.88539
ABT1	150086.280468	251463.859127	248027.800309	199999.186339	299519.684322	235365.488981	191893.383518	227882.578322	205129.061673	191765.765134	153649.507721	195306.717787	392642.890672	273224.738664	208577.859874	154108.408185	218542.778566	266974.394049	298533.500576	267880.763648	241491.258663	269095.526654	123466.948024	226863.599925	444670.929112	120083.187171	197220.61092	222527.960075	204267.431421	247073.684797	198022.005571	343866.633295	197518.841169	292091.254318	461302.068995	140786.358739	337117.543777	221949.441522	277241.493768	324171.647501	289318.380182	174287.816619	222749.484144	172324.392518	156163.189541	236293.82865	143297.330088	151379.960083	204713.495209
HIST1H2BJ	39617.2969118	246835.805509	113977.628152	23908.1080299	20030.161697	39085.0544082	51985.3521936	89693.6875952	599497.718128	164659.297146	4630.68368186	11365.4021177	59277.4192368	22428.067124	97383.637246	166234.150036	22570.8399653	46957.5425553	169540.348134	69657.2724455	131204.242809	46439.628483	98373.9715107	22845.849444	51382.9727105	76403.0859684	14566.3303558	26353.7997618	19644.7573054	26005.7212587	69290.7323645	68446.1767242	9279.58619919	29759.7619219	156281.94353	111051.828908	30055.6713002	22997.867906	436448.972207	102350.920736	63883.3788531	10154.0023693	12898.9387691	66439.5097758	11297.45251	8219.90667988	6747.63832659	47579.588891	4555.36764664
ZNF184	102590.01822	98462.3148996	117192.451087	92346.1850788	119065.514311	107039.466749	108895.808735	99799.9880528	62122.2335474	164571.782014	127662.69843	120395.630417	66360.7428996	154878.545345	104316.427565	102066.750531	94339.5798532	106910.919135	43325.4078724	118315.283766	205866.854524	137401.605875	95845.0835866	118291.14972	37024.7070498	68838.4126334	122804.094617	76645.5585518	77378.5861903	155223.130511	66706.3246658	147115.815107	66095.6124279	171911.501069	94926.4048486	66205.1196672	61421.7163077	84997.391761	150426.730737	104189.371384	141244.464026	125175.820531	140944.813148	189983.298286	61566.543511	107112.474278	55121.9506032	74342.5725263	80674.6563686
HIST1H2BN	4397.90332708	21953.5129892	9798.40262118	3812.49462509	5898.20311444	13250.6554067	16539.4614363	8806.19157459	49088.1547379	17456.8715111	4979.86614682	18912.7232496	23292.7733901	9606.4295436	12154.9939777	7176.39971752	4358.17563001	8678.20638636	22840.5573496	4914.80803161	27757.2187267	10334.8135083	12575.647608	5409.36238289	2352.90296801	12734.646869	12707.1516518	5626.01306694	3975.34039562	555.170521667	9277.56139018	10835.7095141	5126.77386562	8159.14597387	2206.42544185	44945.2049322	9063.91982898	4736.98552701	27009.6907537	5651.11636271	10962.8592327	5374.03485834	6847.66143209	24394.4882781	1900.19174568	1677.36982373	900.30426683	14929.2303481	3871.68822259
PGBD1	33629.9731689	57039.5591281	21690.3724787	47623.4087371	33546.3885885	43555.1925956	32302.0727897	31117.1040349	39888.1146659	29730.0030337	61871.9090653	57250.9217562	54833.3833263	28053.5401814	56359.6126411	34301.4337546	55595.9764696	68182.2075275	53216.9789906	33406.8001532	51089.9904604	70799.4701228	35033.0509178	40117.6859541	22926.7509204	19389.5936417	42406.8166004	64298.6938357	56021.0036957	67066.3675041	44579.52136	60096.3039108	52977.9004216	62809.8201021	32671.0939712	48154.1395486	42389.7343577	60052.5643473	17340.5159812	34002.952888	151098.221654	74122.5375599	63006.8397159	31777.5948928	31054.1900863	44897.5358217	51218.4259083	21134.0290634	62680.3893443
ZNRD1	71132.0366394	110384.499586	164374.45119	63250.4632548	83757.1202591	94798.8196685	81439.2757254	86340.3596523	126733.892919	75125.8357749	63734.9545972	86190.3409848	99872.9010834	137009.303607	126057.959083	65562.0888273	102685.39948	109626.667685	171617.600215	145799.874197	129931.490669	120070.534071	79387.7615827	100854.703741	135168.562961	48798.7779304	95875.6405379	84046.350579	68894.5585722	128040.151404	85648.9475034	99221.1560867	64820.6388914	116606.910282	170819.13889	56191.0519219	100113.951414	72266.3009471	112234.82112	82619.7736234	139429.331395	51664.1097311	91923.1413323	50361.7855735	63770.5281316	80811.1740588	51968.5191631	65558.6426208	64112.5816935
TCF19	122653.493986	406129.994815	240017.855901	169499.326222	174233.994253	284076.679237	161721.076259	122510.038007	85852.3206665	430790.822791	194053.306468	173568.932496	166045.363888	138757.186661	468734.913092	235678.489706	161805.793825	229583.849065	214580.7984	102607.287093	362764.589371	121951.678588	81102.07051	92113.5826687	188743.10722	131425.778974	71552.9262731	103423.508653	82200.1869065	554333.372223	200308.143777	441526.573387	98098.8434903	158271.204153	283662.126853	216643.373616	221567.708928	82851.0433442	261827.725954	199228.086076	284219.490623	80046.7892708	138121.633941	113375.008097	126028.804338	126846.446729	50870.6263805	74214.1979656	78160.9929308
NFKBIL1	163323.921052	400024.22165	383999.278848	409783.298252	327106.677385	257576.081001	164876.415541	166284.393306	198138.536042	220792.56248	145566.760597	232716.430904	353281.061219	267155.171998	168309.041402	212654.291489	359998.278467	141050.797094	689127.475838	441116.491268	153057.423624	170630.471795	83216.5811126	287374.559867	755557.875058	60881.0249305	253717.510603	339649.735872	146866.369962	418540.645552	200588.685597	284574.062467	245933.279861	100478.116917	224813.07157	214215.33573	349269.124719	357685.361228	209643.34806	165445.785915	340416.435817	149322.272919	271142.033966	120529.877193	211883.7632	273181.503288	225621.512429	353140.912931	260045.172206
EHMT2	286829.990572	835175.63619	319665.932859	319141.219625	492067.491079	310044.671672	232385.902845	187482.437307	178372.057222	356787.893984	196791.879943	287509.375966	434553.88712	167393.692291	323869.02956	207944.095152	326365.943114	254386.33368	357946.163481	401513.054861	362562.260917	253715.74609	138996.654317	290526.417729	334845.822987	127740.831435	262157.622564	264478.042609	140606.854061	344885.862542	211037.763547	446819.876702	219356.549121	195623.623651	416296.274103	260429.221079	392037.320065	366680.689872	359540.35604	246244.414647	340131.539008	181238.678309	310403.689346	251038.360656	191639.667095	168135.510163	149234.627954	323995.729945	180074.201792
ZBTB12	106987.830887	170620.239391	112971.878042	95539.8846048	398392.152524	205007.032349	168804.001819	80600.2143623	84556.1826578	103657.262278	54432.143119	130825.249543	94365.748385	60760.227561	84179.8197635	61203.7199509	108533.09059	59196.3179324	105499.087829	130604.106303	141949.616648	132149.463559	36581.8805373	166646.570781	97679.716229	65778.2818259	166056.166056	91927.4594768	37601.5206497	162371.721779	95672.5371315	120552.186815	85500.5033603	42316.4614683	148237.663646	89949.4632338	360285.528877	150022.758307	88009.1676216	92503.1024162	261006.644608	55800.1484047	139027.107315	115617.16561	45965.7966772	53651.8144235	17619.9868508	120264.093448	59316.9605828
PBX2	309131.651962	307729.997174	312338.625649	304181.957987	432034.134058	388624.690149	275803.41642	269581.282976	185437.684906	199099.972866	251216.011068	317836.845306	439639.511605	290787.472495	255492.84433	309333.452252	339098.852019	309239.204318	278078.954985	269900.097374	554251.158325	300528.060698	222768.199491	287004.781933	338550.389441	226873.8764	315181.714813	351344.329857	319586.575741	368884.101095	235453.084577	463909.724237	306360.528618	306726.827953	444707.268162	348019.543284	323269.551832	348394.889733	304378.698134	334943.995186	455611.978813	346300.292118	409628.947295	263913.11657	284875.456643	357199.95838	223732.38746	267030.314254	302354.138287
RXRB	289954.145	595700.739491	378495.648911	240920.619553	360230.384885	258869.370533	264289.890581	209823.479231	141883.331065	222954.385516	261554.874901	303669.337832	274101.123894	243593.469565	375377.53029	232586.45448	405087.695036	195560.167774	278039.284518	442726.861751	283657.822384	288370.065007	203046.351436	312423.651745	406549.42051	123175.156085	290195.443257	324987.963409	198500.862242	439132.323397	297647.689622	286862.261354	326254.083382	316289.30642	242513.923999	253843.351281	424369.942656	310139.986809	284999.925587	207820.919447	341755.619204	320029.075197	338178.345976	277109.811629	250227.743752	292834.175471	309317.513988	282568.588634	310990.998152
RING1	424807.253025	652704.008159	592988.03371	620430.208604	446178.039643	430528.284896	445897.250025	444111.935309	388904.975669	542123.177835	351189.895733	373972.445747	653545.844721	409237.575568	570599.332163	398425.524251	821382.83617	455117.205826	707889.397227	729225.179738	531860.414957	448865.641281	278407.377748	633100.946818	1350676.90114	176385.656711	445954.241334	822301.777602	467931.707634	773547.518188	412263.341626	703127.982776	621578.768766	521210.351769	769174.889004	398317.39521	607701.912307	595371.325936	532233.658828	356397.417974	534118.459058	395636.892406	670360.389177	350588.074587	425231.562916	634445.62187	527271.662077	533852.267908	569157.857039
ZBTB22	184595.110354	199439.01793	242894.215924	297847.734544	273659.369192	367187.596669	198137.249803	176094.520561	116045.674976	199257.209572	184910.487198	276186.718548	212416.922302	158438.743979	178844.843334	204542.753037	240399.802223	179391.001132	203776.777587	260391.041561	203238.975631	245125.162332	112306.909641	370388.985468	666072.502701	96656.9580122	307189.823319	350508.360666	206373.168296	290078.480022	279821.444849	400288.904166	256367.84453	189719.889866	228452.962105	309118.848173	279981.578782	289317.477712	202855.930435	227235.800117	252642.929039	193937.894903	231810.940279	197096.337403	184789.598563	265034.208609	203167.38679	244999.843617	315369.037296
DAXX	475385.93778	833626.354828	623091.824367	596392.410809	595551.252675	727686.879295	457234.431689	420182.816383	391954.445343	570064.064831	481937.393123	555566.810754	467628.779596	649871.283712	676876.367828	692778.400562	497433.222488	660428.170229	617123.776422	1324349.376	605458.75443	599240.169826	457242.306286	678377.190129	748727.323421	450207.569059	502307.816718	469768.708227	473976.832578	551038.258985	326428.774649	797755.917112	452685.619818	656614.834418	669848.012821	908267.170402	602703.683028	507092.839978	608801.590049	527323.098521	612326.385646	364598.578383	479266.965787	554464.729024	303216.329939	364193.543858	320566.652024	411675.733698	389767.400988
PHF1	313776.483133	373102.262095	281444.609708	357369.123491	346785.484382	385449.374129	409959.831069	240442.220545	162657.213905	171821.006273	181870.659622	337973.351524	302374.344272	590938.150287	246927.486758	173907.917807	471625.249637	335535.382738	411368.378208	691902.947278	225880.770529	257639.206962	198451.742608	415393.748918	528970.271567	125127.216612	582657.979766	480124.762816	284718.173698	432931.729964	257346.002664	334809.14372	469326.741755	342504.49022	353019.363736	391072.763783	307952.667864	448710.776096	285184.508351	217694.900881	513038.77038	481751.097834	381349.578915	279768.160694	327400.303216	402248.606756	311819.181076	402088.884947	479213.021982
ZBTB9	0	180.514147616	209.476760046	243.088197321	440.471295477	139.993672286	90.5279681631	106.68328081	170.233454755	208.015676061	97.3047887141	223.895405023	461.333106204	577.080123175	207.398033016	349.308654134	402.692428423	264.300321283	1037.63879067	620.216848898	145.360351946	276.180635392	94.8228074644	457.200934724	777.393349568	188.140064257	270.073262774	0	171.99844651	504.424178362	255.440287416	342.443559095	433.316468295	151.292751171	2291.13511139	952.464349706	430.609997817	151.017297823	553.032613094	290.635815739	321.315474119	574.448435129	492.810996387	195.714498344	215.812669855	0	327.204145284	505.512955792	0
HMGA1	778283.244962	5414276.18163	2730705.82654	1030993.03765	2163570.14366	545603.890488	917399.458636	1126714.63333	2918204.50274	1014396.89188	645410.244322	914212.469575	2443459.52011	1852371.52092	2552773.17248	945287.561287	646932.164138	1126264.65143	2162801.0979	415960.863369	1148477.96076	951528.335751	427895.59986	532074.022393	2538067.12612	589473.140409	713081.503799	608709.091883	739844.184938	1417269.25519	1360471.23852	1944049.58324	534725.649857	964705.647202	680062.790816	590306.460112	1462391.52326	636489.301835	1384795.44563	2278592.53902	1112164.77213	253080.842057	569685.911572	742107.408862	601122.867047	819601.099829	212114.200082	817353.115971	323221.638219
TAF11	369456.367941	791311.414443	597597.024602	440064.409849	614776.194857	629172.675319	466782.945067	353087.223737	1586662.42344	753144.71648	485020.153488	462551.185474	637146.569012	410061.082589	683651.124286	472212.535621	391000.585093	525353.428746	691303.53025	341212.534946	589515.715335	591466.584245	252875.14335	452429.985097	352695.326354	255174.369152	293658.521507	353479.641401	377975.077268	552083.483683	407119.598387	663695.497029	339522.7876	798282.221337	931657.224441	451503.668467	519964.842819	348000.437881	718956.747868	501561.141393	524676.444418	358174.935895	535142.681213	258540.710362	272945.932622	379397.963752	347040.171772	411119.182776	334704.196265
ANKS1A	187210.288469	369858.172597	185626.484786	177139.771888	313432.016424	169909.516489	175297.999554	142955.627769	303443.883664	188494.830616	158863.585719	197905.598656	168447.100974	79754.0994401	305769.33467	162342.189216	174615.922205	104418.971701	120099.914823	108237.6417	240585.667552	184733.99533	113483.381896	161143.259064	156619.122132	99445.7520494	116148.559413	163045.458992	137766.618758	162364.184043	187276.855218	235148.417545	203697.615178	191361.018913	108094.505931	139363.931526	183274.401134	231041.981201	220499.088866	131713.132546	178246.057131	248727.974481	156160.438906	161636.956736	157407.908305	213982.702037	222137.238176	173187.579985	219093.892221
ZNF76	115365.171792	239377.819621	149122.182647	100959.014862	147965.223153	165258.643139	89825.1062981	86578.4873298	321499.156461	134460.548619	83071.2867305	138512.699389	134970.070732	87811.4237186	115692.329394	78468.8524791	141710.326543	80532.3221697	132095.208514	199571.804486	105318.231912	123265.274227	54052.4361673	152282.694631	146046.01482	64439.8703134	167380.341191	161977.165333	70326.9193808	125798.77604	104444.713683	131657.11478	133265.940492	73950.8003512	110446.335213	115596.574456	223765.41661	142536.928026	109011.208037	110362.611607	211405.987832	112212.481474	129630.197863	72334.3661942	92409.4975262	109474.830025	97108.5899194	147072.674024	110978.793919
PPARD	238045.999539	409913.810677	264614.314455	206550.84682	220419.46569	334182.516669	227916.844328	225736.891353	392439.332206	337533.92747	123903.948909	191756.894954	236708.546986	188780.750256	244667.464203	317396.039116	291106.419752	140482.054818	209104.354475	204255.206353	217681.872369	284442.011805	170502.896337	273853.871211	336976.383024	117685.683677	212494.93989	216264.354114	239137.810491	279114.579989	252025.972926	728878.86071	268191.831588	355118.541147	355964.620061	123424.538203	309104.068482	257964.922285	573969.742894	257794.251133	292901.871879	197062.640114	299599.231873	156768.454878	428045.183285	209937.473262	206332.790341	178330.649637	200893.041908
TEAD3	278504.654883	519599.010315	335165.429375	227064.487337	393567.031374	234519.366895	367892.407371	217036.522518	592758.142887	376463.71108	203637.583449	304178.887316	401479.906518	139756.54809	202346.127416	348058.436488	400985.502561	122393.088243	362438.440652	339990.415216	355196.228117	313997.797734	208576.617989	356602.544749	594740.196675	110022.654242	211116.429107	275505.955702	298175.513051	264037.076995	250608.306484	611617.012881	335186.434457	751061.621185	569600.183179	165401.406772	508214.302606	427372.011795	190159.882736	434824.766626	420846.40574	263743.873517	433872.111715	189688.406533	435953.000145	459347.726229	215466.722614	202915.378785	300488.261458
BRPF3	278986.526522	223123.675512	185838.196201	265956.316052	162409.286559	274998.548442	270540.745223	155933.723062	98302.8825866	240762.590262	202229.161851	337155.263941	268661.377079	121381.512961	313777.668317	276908.884904	225258.256649	228793.460217	72711.9929979	177463.726469	688510.748105	226238.534297	190674.685433	249376.353993	92711.5727176	165151.413877	198607.336064	219654.594061	172461.409212	296284.750164	292742.487912	407043.959714	204651.279219	207139.428625	265582.044217	220416.13693	205728.142697	248403.838428	206370.103166	235960.361264	317884.610693	278123.135615	376948.284414	253597.275796	376229.722524	181849.742517	143164.306991	150910.10312	191545.184434
NFYA	266249.857913	753360.14041	276003.852706	338169.170089	284722.063164	322960.295923	269987.467169	269316.861581	195082.178873	620460.982028	375849.665828	261800.703219	187808.513851	221921.832228	973403.865543	514575.123985	263486.449623	308384.218587	213980.804096	273900.779982	559859.724674	354936.68512	244250.165864	262511.316224	92734.7379435	198193.684778	174291.436427	204536.774739	275320.995851	292418.044906	426362.548924	269609.111813	187369.235903	369726.771916	466586.569306	263928.408642	253969.562135	318890.995056	437922.814546	393741.140178	515944.853873	276417.127789	267854.802625	342460.571857	158219.850878	207797.292054	186965.27285	121270.935395	203264.305513
FOXP4	267663.960951	737007.140804	478485.117754	325900.624059	265444.374575	263627.597809	253437.72733	200847.373715	305937.550155	1199554.93006	127007.319914	197469.832327	1199636.21608	161175.999858	650527.090563	892305.880954	433488.369958	313045.753569	266871.783694	279460.826024	251224.435091	473991.621051	226691.302864	224232.679373	245825.468664	133216.368841	305745.038322	262971.231572	270796.417052	286879.969347	239516.587023	566163.157282	289725.960253	422073.770898	491796.360119	197275.280584	309424.619556	400354.395157	417250.378762	486827.050159	593676.044737	203845.933364	305853.280701	264204.707739	249430.617424	282457.904913	390880.988687	321350.462147	206911.147969
TFEB	47312.0870521	76389.3812402	108152.205869	87821.5507599	69810.8009767	42059.621568	80580.0215653	105264.476285	36155.6809114	45123.7489676	38736.6091281	46955.4807082	113430.154967	111325.070129	93687.1775733	52628.387168	77504.6982746	75833.19668	48312.5759989	55603.4068472	28390.6680029	50797.3513848	42758.0684728	65386.8571929	196638.124177	20130.0208589	116018.175508	97094.032715	72785.7349505	41050.1075109	36804.5674741	133766.894009	88216.1900179	65799.7568881	32298.1224704	36150.9378532	37455.9031423	106377.354647	108087.864441	48958.3098537	23548.1157735	69717.9540899	59763.062141	37703.2476596	151674.046141	75066.9177247	84336.2891195	65012.6536385	70492.056005
TRERF1	144227.558474	38842.0126467	28702.0277554	113898.955991	37430.4896063	69304.8343123	139742.774487	62670.1909465	63372.3317594	95925.0892355	113145.912673	132747.330816	50307.8919415	78789.013426	55904.6869956	85737.6254372	47301.1873278	53230.3763985	50762.304196	63149.2410462	102502.848718	110851.425071	62614.8894511	158705.667508	62980.6917967	94496.8025098	90643.3912125	74660.4909136	60878.1961388	74620.6586556	15184.8546956	33772.3223537	69168.8417762	75901.0999821	145054.997725	99873.992622	98279.380667	62341.0421162	74158.4404782	28436.3765531	118446.197975	59084.1930878	97971.9988343	73811.7284433	37351.7806263	29347.8759386	45661.8209016	63188.4220945	46063.2979116
SRF	406190.431748	665909.129753	506502.741685	343492.531805	311201.041718	280055.50903	391095.515486	349550.283053	241034.52899	253872.24176	239604.636297	206846.531878	481796.007124	290162.532929	1039697.19805	267839.268711	375013.473286	235959.762225	383673.733681	197076.339144	510214.454808	350963.892782	261378.820548	349665.95833	484467.329658	158227.27158	196720.092008	460037.256716	838920.171564	586406.972409	253395.427733	425548.873613	646791.754773	461856.371784	372910.228813	195816.821519	482836.114319	443359.113082	377538.13698	321107.941223	310753.559713	425341.901075	479852.131312	262794.361798	302861.444682	564947.417694	445218.628867	211754.348518	420092.275086
POLR1C	167768.957728	359613.522683	374369.383719	130203.787135	335097.922567	203832.642363	167117.849966	149500.301132	179498.738587	312604.898679	188834.553491	120394.424138	273653.964562	168350.596031	447837.676067	123997.546244	169900.341244	206536.519639	357523.385602	299015.131137	231359.531413	285502.253629	101877.730176	177477.445299	236322.245609	109277.091002	136140.003597	145765.764828	191666.381879	342168.056882	164344.95294	255961.211976	151123.388004	258456.25115	354466.917935	158205.4248	339403.360806	170032.414116	249706.280807	219477.855054	219901.496403	129235.069014	174333.565908	108429.927956	154503.956229	215334.267196	88919.0674815	88394.8852842	138114.870137
CDC5L	279738.948598	269197.153795	295432.252933	219583.616136	256504.340861	256068.151704	247745.408458	207604.003498	155211.193866	341640.567768	264738.894473	180078.276003	174104.909248	231530.151801	582957.348957	283515.682982	177500.068066	230311.12714	223371.418465	242550.616179	465502.620221	308270.620825	179540.187568	229828.176084	104209.116568	197051.980538	206636.825039	176229.338309	253350.150166	400084.904869	350666.939181	287478.03566	156211.531306	332253.297135	351653.093193	219952.793951	221260.329144	179359.409825	249714.630966	325450.966833	253658.264695	267519.617945	183498.554298	371857.120261	211148.656667	272404.715741	213498.641624	114178.295418	254346.679476
SUPT3H	33551.0172502	37525.648624	36450.4453239	26533.6955499	28566.5733471	27561.9434413	25476.6051637	30517.2802555	22179.4077507	22886.1204713	23552.2829339	26448.3060808	17230.4591442	44861.4105092	53802.8351272	13282.4084445	31091.0017103	29690.8024322	48368.7198587	14293.8475671	30133.6338279	31238.6386777	20535.5777512	26077.4940058	20707.1899246	20209.1345833	38158.7317226	21922.5523401	29281.5706874	42864.3773292	24036.1703687	33809.2782426	31489.9111139	46344.2978335	30956.3679667	33919.2592365	35594.4871558	31131.4398247	33224.722516	19466.1410809	53523.4003236	41437.3534457	19547.6014415	28729.1963007	28180.3250251	33623.7240525	37041.4580124	11318.5694304	34504.39375
RUNX2	83432.3249906	40313.7539105	23236.807967	48519.5673825	18204.5338256	33273.1737869	69345.263472	73595.4456391	23988.1630003	23801.7976097	84882.6778906	100704.146457	38020.335448	42251.535493	50209.2612127	48708.1752281	46423.0175989	39447.5757601	67763.8169468	4016.14636882	138622.672508	110249.40821	86799.3533867	74350.2928258	14968.301523	62333.0402077	60662.5362485	95387.6346594	47144.8329769	39576.5779409	66303.9980512	56885.3010902	66201.5473227	254883.703118	114641.778161	86862.9872387	23011.9570287	76287.0000284	36217.9654131	34110.8954121	50242.8047575	20893.5583107	44694.143381	29811.0068574	67372.4108667	22204.7973128	6861.94064349	35585.7589512	25885.2983339
MCM3	723856.857822	2385409.99001	909335.631033	707476.097339	784787.988731	574070.862956	794557.924835	458089.239308	562283.433022	2569072.87328	889471.871055	539117.071001	744847.388903	592321.678801	2965360.59787	578520.144125	556646.267203	985966.724623	1041481.46561	608941.816352	1455925.82034	834460.949022	379756.251297	699667.179092	611229.319321	544061.27292	385145.042679	487399.502707	624640.49085	1382775.44347	706301.422596	1841282.52121	397619.204695	483106.272136	1039133.03102	661447.087551	1041131.44818	445439.297672	955122.322959	1031332.15403	1335392.5684	448534.419375	588842.712461	567823.471303	476439.224929	623454.42075	367998.703088	315715.508185	500460.177935
GCM1	816.703769973	0	114.170516235	2384.81390254	640.183476584	915.604184311	986.803963992	465.162254409	1484.50960617	340.122557495	6257.98240791	1708.40696389	251.439056437	1729.88376164	1356.45064342	1142.29614853	1463.18864288	7586.67779379	1131.08257327	17577.8203063	6021.12543549	5820.33625487	103.362004231	747.560732691	141.233487378	307.624314831	60645.2686019	10970.0578366	937.43818767	412.387289399	4594.32221826	746.564113643	1653.18460183	164.91730634	15401.0129808	3504.0526153	2816.32954811	1810.78751972	0	739.220547374	9573.53547892	2504.71983143	2148.76288334	1280.03652371	117.623758941	996.776259448	535.005403555	734.715394216	939.081214678
ZNF451	47916.753788	80404.0539021	59747.9501857	57150.4113134	57930.6867555	62252.7368586	54982.4614591	43934.0804673	32130.2372287	37886.4262712	62099.7549311	42977.8932076	38877.9369994	49056.0991988	56127.8001832	54171.4681314	42537.200581	38966.297404	29481.7161921	33136.9439894	106566.617347	73897.2075645	42427.187495	43734.1547632	18507.3855411	36995.3093678	73064.705131	47102.2551832	57000.3648023	62814.7451699	81205.9393879	104369.353838	48589.7399791	56805.1011147	69302.9990216	68025.8904091	41091.7381058	48300.4025514	58866.3902002	47687.0652757	82237.5795298	87132.8877337	50488.2704347	61212.6302911	56661.6059532	52633.5936304	64760.9875005	42137.0422841	61186.3906704
PHF3	275908.628984	197276.359487	284289.755992	209429.476583	196702.279672	239918.425296	167370.529063	192095.695879	105256.798408	282669.331254	244076.920487	204728.573299	145872.145694	259146.537227	182234.824162	209217.394051	172502.369861	201491.430614	58161.1639827	148206.559235	557270.339966	269127.748039	206870.217193	203719.603949	68898.1398198	173345.471432	328094.565905	213220.941711	208350.379501	415828.618546	248966.508014	179314.0462	161049.697958	231776.908552	301091.757048	330937.239608	165483.841236	208109.781616	187435.211531	319199.321491	307386.519527	383595.561436	213360.877866	278571.885117	288877.174255	266986.460263	291068.61237	179257.582919	277386.686319
EEF1A1	25431420.5741	20098653.327	29062226.9863	49342308.0626	17115476.5128	14705223.0442	12777495.915	17576336.827	13461975.7412	16957518.9785	14429673.8362	17720908.6368	15756790.0104	27919250.6013	9325336.95949	18018357.1417	24716961.3812	13674317.0855	81722990.9673	36736679.0968	16842610.4	23612288.7444	13102936.7023	14608448.485	18913370.7925	7542401.78895	19917223.1788	20786148.8704	19674312.3312	17802521.1276	10689893.3606	11679166.3735	16424005.4625	21839143.377	8598957.23131	5156679.5002	26090054.9735	23422537.1211	15449589.0453	14272022.8598	16618836.9034	20877117.7229	12818545.4781	16424308.3175	25806112.2514	32842281.2438	25106644.1706	9890354.97419	27084383.3109
HMGN3	969861.903245	562849.165009	2109524.34989	792639.650805	1211057.14815	1213808.37058	654412.575915	938627.700933	880439.369605	2197758.0333	633986.567988	688130.824717	2273206.82428	1762047.28539	1868511.87609	1103692.02113	1460288.23935	1316146.44054	715549.160849	1763146.58617	654365.714607	1014925.34046	941942.837429	974047.428669	927751.49662	538533.678487	1575019.3265	1077832.82481	985170.802135	1867432.53141	773693.362694	1005660.14642	1115072.19875	1269954.33741	2969788.23588	318497.87907	1278979.42753	856466.45641	1889167.85998	378092.355609	1061405.35609	1121328.36309	1025377.35718	837122.636721	1672014.19336	1267056.79513	1113600.90878	827420.68131	1250906.65125
TBX18	25819.7745076	16189.1072748	5777.61589271	17172.5780617	5486.5175298	4633.42854282	25258.6392842	21413.4469613	6179.54074017	7588.06504711	17557.1204421	37250.9978711	6485.19191084	12887.2709973	14282.252856	16823.8442604	24602.0078845	6427.49004256	4523.69590387	1059.48768407	18390.6333478	22934.0695301	22508.6660895	18549.1099737	9775.44522744	10311.2929113	6968.36214607	27117.5062946	41868.918333	2558.12566402	21681.4784232	6459.15917073	37550.4612032	75864.7845093	20180.7368446	8813.19120325	8811.76829279	41491.1154462	6396.54145892	15928.7233074	152.468979257	46903.976841	29903.0776362	12014.9844618	12557.5758372	18386.9263421	62299.3756322	18650.1590571	40521.7406612
ZNF292	87296.5688922	66309.5235727	107247.058894	68338.799042	90945.8700833	95071.6991029	77711.0752519	81586.0064936	29429.6142118	170708.85365	163169.753868	70319.5297844	49833.2175942	113841.428463	103206.825335	91717.7703862	67829.2369836	47653.6754171	23882.2510922	22156.3303968	77457.9120871	98069.6510952	65527.5582351	84209.5827199	20435.7691283	73495.0215168	92666.3784677	75696.2958986	80082.4138072	194529.390006	98964.1401459	64900.9060261	66703.5053065	89511.1669088	55713.4028914	52672.6461464	52223.778967	87753.3127136	57421.4292965	139345.719689	133227.557833	189537.728408	78039.9134416	112580.21818	92207.8701325	114661.981936	76360.8686193	57139.4704452	104794.622648
ANKRD6	32896.2931255	46640.1397062	42828.6792472	25598.0715064	8182.15050319	10334.4878577	29647.0672253	21966.4064542	5544.18620926	18893.8373346	21514.2301447	35406.0112946	11059.8921016	13991.4042398	63155.2035751	11502.7352388	28852.8714005	12369.6823676	6758.7921325	2468.80410714	25038.2115458	31548.0364995	33592.7754739	31889.8063665	11346.3276995	14875.8953749	19595.0490103	35377.0865039	34170.1790685	4517.7426127	17747.6562666	13755.0561255	34849.5641046	72705.3854598	17065.4126421	19818.3256244	21036.2470899	40111.8914107	25916.1746085	20788.9692537	3178.1517108	48791.1393865	37583.5984285	26948.0935277	42093.6018204	41252.503208	36764.6797637	10000.1213429	33357.1704609
BACH2	18691.2997999	28910.3017857	25710.0079174	23321.6869022	4748.14193336	3664.92733527	24759.0385129	23525.9636609	7025.6700156	25722.8835	10728.9019702	18066.9361019	19004.0624469	45455.8512045	19705.9709443	13591.4357745	16991.5136071	7136.25271734	2716.45904131	229.225454639	15042.6129019	12645.757955	13258.8756929	10983.4745704	6265.08921297	9039.48988073	3493.56572533	29716.3339766	28447.0244889	1980.81591439	12037.0166585	6539.11128151	30027.9545243	27585.309667	10349.5188341	4033.56875257	4509.21624119	23860.6404642	12774.6803791	14680.1677066	593.773659716	42487.2635518	10510.8588556	4008.50731837	9970.25424497	45390.2770553	16879.9690094	10483.3586024	29186.7516293
POU3F2	230.474170644	222.114570694	128.875883809	149.554567611	451.65016145	0	167.08591307	131.268997085	0	15613.1921235	59.8645913828	137.746632116	496.693502484	887.58904432	510.38797429	143.269549372	0	216.806468898	319.192010113	0	313.003950333	339.82789756	116.675216043	562.565265262	557.986149867	115.748959721	996.939147582	294.833833126	105.818191015	0	78.5769571619	0	133.294124867	372.317903269	704.784775028	73.247794193	264.923154403	557.460055897	170.120462938	119.204783104	197.682147172	201.952303208	378.988656642	301.022401515	132.773910378	93.7635693466	0	103.668507094	88.3363801655
PRDM13	0	6310.94211072	9443.46299883	0	5673.42087422	0	0	0	1096.33254836	669.828256035	0	102.994620076	2864.95463344	0	1049.46190272	0	0	0	0	0	0	0	0	0	0	0	124.236998474	0	158.242770995	0	117.505651141	0	0	0	0	0	0	0	127.200877279	0	98.5393609072	0	0	0	397.105852834	0	301.035803994	0	396.300298929
SIM1	18099.9015544	351.996748489	1123.30049103	2725.58119711	37171.490097	136.491566186	5854.79921422	17717.1319465	608.574504955	7842.0608936	822.211824756	654.88319567	1349.37695049	1641.04437658	57427.562662	340.570287975	19630.9302232	429.48089732	43249.3643692	120.940279227	283.447984106	4846.88974487	1325.12675146	297.175677649	0	2384.63575514	2501.51209823	830.646796626	2291.84127982	40.9837846017	83.0167162252	11351.8156659	1936.35084509	5900.31941379	8500.92487891	503.011890098	4443.28320424	1521.47403546	2426.39033795	1574.25121961	34.8085989144	8374.4986169	3163.17810831	1049.50158693	2209.34555625	2971.84209335	118674.974766	4819.1435659	5646.31778069
ASCC3	142191.345084	90809.6800707	147036.364543	110515.362662	129842.071659	102436.941754	86849.0955099	137651.60658	61057.4333948	250094.26301	134675.749976	87466.1112861	108423.956962	73392.1360641	182131.43306	177010.028978	89460.3090448	130763.644746	76979.7338021	56282.3818401	126643.22715	106129.53281	98375.587126	96733.9509686	31591.0452968	90295.5552859	134302.15459	68745.342503	130849.222057	181634.026488	113801.163034	122163.959232	78209.5409085	151325.019048	118221.02232	46311.9247157	96777.9176634	94905.4955054	99923.7437615	143021.626439	83627.5357517	118241.308963	120031.971807	251471.091428	152925.325137	88259.2937447	71415.1566922	95764.4616784	90491.8676613
PRDM1	85448.7058687	147699.232084	58883.5916374	58035.9426256	30571.801602	28420.8915415	102217.489772	118641.389488	50833.0620491	62065.9139021	58342.203524	94881.7682974	52559.7046931	135726.454255	90785.892	97473.8057055	45799.3667269	91638.1100136	72674.1420369	9450.86220113	81480.3770385	105733.776727	66770.9783712	92332.0841051	35317.0201503	60453.7243434	62625.2785147	104925.662663	73825.0603278	52336.8399016	66485.0627179	126807.618804	72077.9661105	205910.740844	62343.4087736	105528.19715	30566.6164253	105340.694604	134257.979554	97284.8595704	3395.91794697	67417.8239445	69205.8993277	53857.3173328	113363.152694	46591.0866924	29574.9598261	79900.7317137	118840.808813
NR2E1	302.462620409	1603.20547818	845.650890408	294.401751965	1185.44556172	113.029983464	0	1205.89545059	1786.79004131	251.925762516	78.5632556079	0	0	116.4826876	0	188.019695251	325.131256165	71.1314553396	418.891416433	100.151812621	0	0	76.5593200369	0	1046.10391803	0	0	128.974993168	277.740861388	0	618.722496335	8571.08799905	262.392680574	244.305573013	0	0	434.589650891	487.721549038	893.029893311	0	0	596.321926115	0	1896.2234064	784.105877642	1722.70778655	264.182505729	0	695.569129007
ZBTB24	92539.6599273	69696.9081584	118802.396908	102419.501416	85474.4698042	94801.0058081	74405.0010048	81274.3349633	44345.1517966	181305.845126	97192.0569114	79966.075554	88934.8917703	115030.18922	111280.750545	106445.277446	79169.6670657	71302.9492959	535360.042024	62728.860209	70532.0086123	103366.05318	77313.5243621	90385.4519746	45709.3391592	76699.7509904	86429.5120501	72843.2954028	68757.2438152	92903.2073231	91441.8374201	54420.7903876	69335.5027694	75847.9164999	91860.3756698	42132.4391287	81836.3416616	74307.7891305	89624.0003257	102215.758022	114584.975514	100926.276447	79864.5357526	110943.843257	64527.3626292	71411.5508433	52445.6843188	80427.6394644	82411.7924767
HDAC2	137975.096664	149838.207814	256612.431785	169057.14196	278436.128622	144313.021712	96197.6854495	139381.923733	165662.861012	315750.480682	139477.594192	113677.682252	187645.726644	122565.719275	246667.155675	241827.925857	113120.967927	197608.887804	146248.076891	136890.206468	132177.255807	161894.584067	278106.199007	162591.235935	85522.8553485	95395.3724662	125988.225076	100490.472603	145988.490112	181425.334957	110124.007089	165289.51688	90215.6983541	205421.033043	176720.052927	54031.5449876	179640.208364	132095.624514	144653.189766	213767.464162	200128.145695	128157.908204	153567.282224	173329.068718	128821.33386	140023.661711	99250.8094745	101403.590594	114200.924897
HSF2	127033.40505	122425.737112	221280.798733	122563.233782	225030.296792	149131.601221	98052.7788521	115788.94757	108047.589551	221361.629259	142839.396473	111138.132523	146533.275501	182976.152993	134990.559336	205991.441614	105559.963038	122055.101294	123558.3175	133247.094006	100773.188981	157321.702755	150090.466791	105696.243404	81657.4703253	92340.4247282	167349.168089	96756.0183847	122022.394563	178366.405672	115256.605154	89384.6127254	104283.092708	157792.964155	168888.681594	72644.7062295	130410.285649	107474.461339	99473.7223198	149994.469764	252206.643859	160103.462171	97574.5710223	137755.916819	107487.089663	146202.459125	130665.136644	110333.409896	163686.397044
HEY2	34327.2820743	41286.5688837	163887.173413	43168.8631944	148692.889005	102368.010689	43401.3736137	34371.4770702	90599.2259007	18184.3342532	28781.9826073	50223.7990334	265942.209819	49971.3279591	154278.940087	40842.562867	66715.2098538	357661.621494	15118.0678311	11184.6299724	97740.9688504	61851.0949567	77053.3385314	30666.9903878	15814.1830641	11481.7604994	10542.5132787	37062.6888155	133714.390978	6794.63600927	39463.8935393	12614.4413419	78737.3647599	121776.479272	532208.284908	18720.9977951	131750.870822	86184.3211955	31469.8961368	56885.7315059	52173.3021617	176594.855937	44841.755342	28299.7738009	78904.6866685	277183.925276	114234.356369	46507.0689818	125359.861943
L3MBTL3	46447.4645684	54375.0413665	99526.4114124	32169.7490905	55305.0348548	13038.6596258	44399.0374161	48297.5430512	20170.117379	45430.9409845	64356.8125235	53188.4925772	79068.1905525	52217.0040889	33009.2648754	41593.7589045	44943.6148525	43467.9690924	9022.05924068	5045.33609223	50726.5268245	46398.6708382	72161.6586606	45075.5143725	19628.6372576	28779.6895908	39561.7450184	54615.4736372	69451.6473069	24010.7586039	33126.8033992	50768.5134184	58238.1401292	90253.9229911	30950.6378687	35441.9473097	26145.0085942	52611.6147395	59576.5820593	34778.6424357	23170.9535114	68498.9192312	65435.3824146	50012.6141966	100183.212833	43841.5197339	50823.7693993	29004.2301478	52984.1020821
EYA4	923.284461928	3518.73764195	1936.04831138	2083.2994627	345.415677668	0	8640.69670789	537.817922101	114.425431006	838.928520494	3368.36454259	15839.62623	77.5233040866	872.762902612	174.257825466	626.117325934	360.902461869	177.654141023	1482.11798496	41.6889737417	3199.88900538	1268.53798089	6692.36705581	1997.55207676	130.634676383	600.692959398	1134.59078669	3919.13987657	3526.15994477	127.146616323	4163.693775	0	873.784011223	1983.03498318	4042.57096733	280.094403018	36.1802668772	253.772377141	325.264330705	325.593349925	9611.01590886	1185.95746925	910.94200347	427.547138388	797.842691387	717.090562801	4783.6093091	56.6315807596	2654.08072633
TBPL1	49743.726446	74932.3934896	102115.659485	48199.9175549	72715.2636913	40611.5003395	44888.6136972	66491.0163745	45718.3074125	90640.962872	54418.2679157	44796.0986549	53601.2032194	91901.9278716	49372.6678431	61147.8928997	51304.086244	69452.9562667	45617.5994561	65959.0218262	41255.4256427	46584.4768189	51045.1175884	53531.2974952	37043.8704629	34153.7875847	69300.7241926	39747.7432407	74278.0701405	53252.4379019	33536.8916981	41170.2921828	49114.9039127	105696.316565	102666.329661	14883.4604573	62974.0844257	53564.8974865	48625.8232768	61133.4952579	39975.4964301	81530.7679006	54458.2556836	59643.9059805	59766.3616103	58523.7626987	55386.5255348	29127.8056552	67675.0986361
MYB	534159.155996	24761.9534368	22355.7427097	566407.050097	170630.224304	882135.375979	276527.064459	93834.7139271	698496.159626	395658.880753	535030.974174	426661.654344	82394.6974646	216029.623686	16330.1503481	251975.691629	467617.962459	123412.997317	276562.09545	362228.047569	238758.519506	725875.915528	571799.999865	1011614.70719	109055.752603	797210.213313	533034.940463	561313.164275	65024.5559715	599498.35605	361892.24865	23769.1240159	247448.749451	115306.559798	187523.687633	201141.683199	649815.297932	485659.697976	19724.1251104	126567.127017	696229.504678	409263.263536	425414.001238	1137831.89571	7815.45959188	214412.44676	6373.54122209	561035.389517	312456.921213
BCLAF1	463482.317658	244500.69482	445797.796778	412790.585821	260413.496507	390807.070381	327057.636131	297921.363839	326492.714924	513901.575423	411003.684388	324853.207479	274741.455643	418880.966	199322.582252	391328.615383	296346.456161	303748.643842	245314.406532	256080.805719	740395.946778	449526.221686	521914.972372	335607.689618	144451.535759	347996.931674	390715.137408	329106.323818	360824.768136	411481.297102	398156.921837	262166.604379	268978.575983	372222.901533	468746.274088	288477.703948	271381.842419	341974.341986	254678.567309	430214.908883	374308.392111	494948.210683	336584.265231	561997.750201	342650.838717	358802.106903	273518.275603	303783.616476	403993.051683
TNFAIP3	150068.846132	262178.876655	319306.408232	329200.085676	83493.9749087	72175.2053109	240115.62283	342550.995919	94774.7038697	160184.301938	117926.121955	159586.891062	242112.016483	435949.015229	174497.667161	239216.423434	116621.725718	264429.741754	40865.42443	25536.3328446	123732.452533	72017.9144974	106204.510506	125769.088806	277323.598427	100590.085466	63415.0307482	269375.623336	359834.098622	145607.167214	106316.209825	256345.410984	228119.673494	190848.601899	63914.3233622	222508.381673	76571.3409145	199602.651048	395589.94351	309739.409754	35534.569424	167277.2007	163060.143389	45663.1256626	116608.785364	133138.996476	107385.925883	269772.444982	246495.804463
CITED2	667211.541245	600730.147897	858628.712662	1217355.77363	617442.757911	1340224.20293	525036.931795	915542.533153	337400.558421	2077127.11691	418917.036986	1323420.65574	844833.493856	448723.84508	251641.883147	1359316.6454	1068324.5327	235680.819038	672986.322833	1379546.06165	186566.599912	1024064.86766	621084.750616	478360.230055	1142262.7393	195393.216265	1015494.11214	1089418.34063	318608.429626	616080.310844	501875.674917	605431.837134	971397.577012	536043.048934	745256.241422	315949.896037	2413965.67459	1060617.89476	493476.781872	369280.759203	653143.139936	1317005.89472	922693.13898	1190703.69204	2035283.57287	1191948.45883	2429303.36239	843848.888542	1355468.96089
HIVEP2	91761.4258378	103481.22186	145082.995338	68701.6639239	154436.158272	29010.0576834	145107.533951	145178.13189	79267.0641779	126495.154119	122123.582674	114230.707192	56833.2273223	98408.397653	81574.7984461	153495.314515	74672.3218947	44174.1184003	40316.9488133	11972.6091947	71383.2505086	97401.0415638	123745.490614	58579.9573329	40313.6062956	89722.6569115	34645.4203626	70835.3517468	138325.747163	77657.7640615	71207.9917895	102536.65494	100216.07086	227671.597903	50221.4675461	68434.5732712	49164.3259667	90809.6955696	72350.828271	116778.921862	41020.683788	172688.311112	61850.8557035	46139.3425648	143015.881168	158238.571129	201042.576025	47908.5327383	131723.018327
PLAGL1	28187.3955032	115877.660647	106482.305884	28696.6467286	73746.0123132	10840.0926634	40181.335488	57862.3245461	11887.0161477	12188.2776094	27211.9275428	33512.7176361	25077.3618173	22192.83099	18891.299053	30549.6639225	58697.4595241	19003.6750793	7980.91682082	1457.90438829	22511.2986746	21926.4216754	28746.7646369	27697.5724194	51685.884145	17234.7001632	33235.9547866	58698.9172397	75628.9735311	9851.92083467	34304.9655588	15507.3242587	144135.077148	87234.9942866	16566.0797077	15310.1079339	17974.1275273	67917.3233705	60410.7734251	27327.1667427	1221.80218247	106890.836343	47486.6831795	12516.1655157	50058.2920791	77286.7432478	148228.731694	28891.4462738	97233.2487531
SHPRH	22470.4671802	15084.7680675	20315.1599953	17011.2533335	28954.8086256	14378.0970624	17342.3089451	18449.9591348	7592.83484249	38018.5357692	32176.1232189	15821.192971	8553.87486861	4832.264845	11713.7143751	23957.0373912	16722.3870251	8476.24232731	1817.55933434	5002.69575878	37695.820316	16157.0082368	30366.9328537	15645.8141609	3055.53448879	16172.1516866	20791.9355167	17170.7566781	20339.9158533	26636.2392889	18486.7829351	8778.06503752	21270.7971158	16443.4813115	3360.66491963	12960.3493321	8775.28094973	22917.0226483	12734.9736275	18360.2232171	18797.4683837	53473.4677569	19601.4686658	32944.1087225	23400.6056027	22476.4465462	32431.3721412	14945.0346677	31382.8851792
ZBTB2	206208.671483	183293.364463	194414.838664	298402.090593	174576.117658	285936.667896	189053.276644	175340.013944	348033.428478	216392.245184	312353.851071	364927.33802	152995.376671	254706.171453	161230.693914	195685.270396	189585.683924	330241.455228	458489.262698	338536.916767	123282.184342	360440.934022	237978.303556	252522.507532	132318.637687	193789.380672	316511.966997	167811.116668	196624.171016	358557.847128	177275.642134	149641.407581	159765.043947	206010.002405	221057.341287	114968.457707	184388.315913	195029.114429	254611.20377	276494.800013	472730.625292	245900.261509	195039.999423	352021.090721	135354.493788	218821.958903	165482.596401	247197.253218	179966.506623
ESR1	602199.482037	11137.6791999	4563.0091016	949554.490963	17825.7560111	1641294.17509	551488.344861	32817.2926135	2791146.35021	173150.97279	967733.270787	1695493.94435	7065.02423217	90609.4973062	4448.93052583	16247.8801312	826686.928793	476612.477837	481370.182275	1203483.79096	307619.930023	1631285.99988	2154153.62116	1024327.14406	140685.817717	710991.628514	1143925.27629	445854.627652	67553.3269044	4010497.10135	1585296.44118	33472.6832565	506058.377502	15557.8768577	437007.67167	412842.17463	399408.845388	339913.488043	14309.2167155	379103.418915	2997377.87171	304181.076975	486174.15677	1864826.50196	14795.0994168	271618.117667	70442.3781347	477613.591041	620070.13305
ARID1B	167098.938009	126540.992153	111070.249208	142034.570425	229716.234616	154811.557679	115829.000047	126892.911123	147385.111076	288319.112815	133441.406748	124458.033035	104343.937282	132120.770097	119688.561752	157658.174947	132487.682627	129970.742846	71034.741637	80294.1374762	111956.446957	159391.215589	116984.918954	190051.282526	91590.9195696	92310.3339423	119802.740104	141426.630971	134313.875404	205492.741157	100043.249557	107705.20816	128970.462995	150695.990465	113160.716384	64676.6094285	127807.362006	161345.165015	112940.828789	135592.028987	152652.298608	187133.654224	148519.594061	188640.654576	158214.46947	161336.960045	157492.66604	160501.735514	165139.746629
TULP4	119879.005841	115279.875889	87753.5405197	115073.876407	169049.931192	113273.193442	120045.686212	90534.6886054	200681.062662	269156.131225	153883.693733	66493.3267211	89556.3596528	61233.6735828	161324.555761	160543.413746	68103.7193629	189645.330378	79872.6365575	58370.0742594	101032.390189	168085.295721	88169.8509592	114188.659534	56995.1560872	105702.402272	131856.867714	79283.757666	84396.1445309	268239.720919	72164.1372204	70320.5967043	64583.2006537	121970.20861	82442.3209692	78690.8833917	100891.729704	97480.0246534	70486.2461295	124735.419282	156138.902003	95956.6628624	105581.316127	238978.442783	78494.5902435	77361.859631	86256.7923712	131877.226849	62562.607191
PHF10	334266.468387	337610.254228	201821.660102	362494.490345	317541.386834	425753.188193	364902.862671	228578.201751	335349.385477	574051.772287	461113.116252	183277.121135	283669.508816	335983.472379	153676.433338	285113.962829	273052.972386	196967.100113	186352.445456	252937.655698	204609.877563	412393.65007	196504.076285	389944.644855	163500.730584	266876.137195	564755.353335	282753.317827	312784.365391	440179.962107	187744.133891	344010.544683	258536.38376	283205.540644	302182.394319	298796.362271	283481.478546	328831.624555	202632.238714	306449.261107	417139.443661	497229.770927	314968.829895	347918.27566	340921.115256	367544.584702	441149.529999	293214.870243	455907.186681
TBP	177286.431715	313147.050438	107963.684858	126185.675751	214097.866827	269768.905562	118217.7107	151778.586282	289018.650766	359624.808882	193982.777984	109765.985706	194616.358878	195865.467734	143698.851375	153255.886877	174692.375164	185404.557174	231719.303522	178494.757198	102649.8715	237305.839439	104473.982613	182730.852583	170153.78127	109487.639583	146983.463961	175056.21407	151858.08671	192839.284309	103320.332034	203335.692922	169339.884453	156175.394365	148523.189595	73071.1440907	257438.327839	161251.202125	122273.122783	190267.679259	284957.845167	189814.256313	216641.334146	137629.834791	122719.153228	182116.272224	131863.431101	163226.776568	162868.922263
MAFK	74040.2667611	345016.795618	83841.8280011	94582.847528	176395.283466	98433.9536565	95479.5921552	93621.207728	93110.0625391	49574.5030947	57234.3362203	70691.1822779	222541.89552	89931.1670554	119957.617312	106667.1201	163988.557465	43123.915499	78922.6946944	69942.7639242	50415.7827935	46244.9130596	60133.825328	116688.282978	238966.553749	38795.7642149	134023.46287	179063.869642	217571.244408	86963.9503733	106987.709236	128610.447463	279630.353282	44188.0717983	41435.9853719	198497.480326	206484.110549	129464.033197	79359.993898	79711.6207786	169662.498712	114072.06536	141936.199678	102151.202437	133141.361728	150024.739657	173214.299935	135455.322414	135710.717171
RBAK	87385.7388205	58315.5103623	34062.7571149	81477.7152133	120423.248935	103787.768563	106945.163162	75765.9755331	70622.7183997	62831.0452924	126159.517206	106943.575871	84406.3933098	108894.894872	98614.5464539	90407.0687941	79461.1291502	79774.5710257	78523.0918552	49902.6120177	120828.140147	93964.8793805	126513.979364	76671.2501126	38153.3337598	154880.739386	80815.3107004	66201.2518055	85357.7876692	53299.0821199	124223.327659	120933.598483	69945.029118	71085.6382114	128485.60614	160344.157337	60743.8817904	85212.8555658	103878.157806	108783.844445	130610.185183	99505.0335332	83443.2393903	131621.993162	80840.1393254	115166.92274	66950.622322	51079.0820943	82510.4055135
ZNF12	149991.519902	136608.008763	82660.0357068	167018.387912	179283.098602	156206.562269	197697.427641	134639.093778	119625.879989	93564.5243093	197824.69518	198229.391759	143390.159094	185276.764761	113407.374424	144032.634853	147866.855444	127528.372807	129153.903186	103824.417594	221373.936889	181033.512781	225960.619941	124740.935336	69815.6562568	252321.434813	138304.839079	139339.961237	173714.534465	76777.321443	198251.754547	281462.035007	129442.762622	136187.696604	260297.228255	279444.759859	105663.864931	157422.005001	182590.915929	204234.621591	213544.189531	219697.903942	195095.332777	182132.237303	155830.274123	177252.549068	124554.146424	100673.138959	162172.636203
PHF14	136926.402899	111095.691544	124760.560962	136803.279895	191574.006749	146303.798435	124154.061715	144320.560393	127580.094283	100254.569737	143832.243615	167912.600003	99898.83749	159741.557492	159443.957463	132059.458203	107320.200794	132873.354806	140389.127843	154910.283823	204398.957749	131056.398509	135316.698876	115425.764205	79158.1572487	134827.245201	142102.697391	99360.1504228	138644.81995	89500.6114133	109216.514097	108037.82335	89978.4600733	134390.124604	318093.669387	142311.046903	102540.78822	123349.136105	202696.718688	145778.578015	150143.905943	126575.601955	133436.525381	165839.253164	80161.4610583	125061.326632	92550.9691409	88340.7494752	106318.011031
ETV1	45519.1040901	17369.9438187	15068.4066266	37639.1333612	12517.3978023	12110.6173256	28998.9626203	42199.2285098	23423.8472052	19005.6801882	28729.8864871	38702.5420166	12616.2082922	29528.2765127	27660.0519164	25473.7162342	39800.8309202	27945.1047687	27319.5963465	3110.3720176	34170.8689242	81803.8655515	19437.4527735	50048.6442729	6132.18588629	26919.7401363	112331.435127	38603.2106656	62158.8004786	6679.92216191	36549.2920646	32200.2356628	39285.0541183	133536.369313	28904.4945232	19031.7056274	14441.6454946	91544.437014	17030.6841794	36620.4754735	469.988482597	64638.9499239	39890.5030791	212863.533495	147259.784253	40747.0476782	20101.2776208	31847.6316348	81502.5194224
AHR	498749.115521	202729.447343	580747.759185	311832.050557	453090.071798	243878.182531	420644.041296	649507.064928	193109.242908	119584.405365	533454.38938	324999.995251	246633.554399	441814.829484	283269.377189	340875.812172	312797.485023	210481.617819	142380.601306	254370.809075	188177.475498	276178.147652	234780.872687	155829.638898	102127.225988	388109.876383	187766.43908	396894.895567	688376.72208	119542.888536	490591.191715	1217290.66404	529680.495338	487760.697824	321118.872492	300120.537103	227383.412175	416694.654726	518181.886002	308737.498046	172917.539185	744474.009933	239490.607492	268950.035048	1149314.18025	563547.458151	334751.994817	360031.776121	506435.013741
HDAC9	6888.9410331	32527.1325108	36751.6499795	10950.6126119	10151.2661604	3610.83340292	30014.1290175	14064.0606497	2957.69372825	8346.04335136	5437.82668054	24423.0009627	43898.5441843	15220.4668144	10401.5777039	35287.8340718	7934.19193672	28009.8863695	2323.232985	1844.11585373	7420.40106487	7832.5311832	18784.7097829	15887.1279342	3225.82589715	11002.7444686	12335.544516	17224.7647825	16975.1130978	7657.23816701	8601.69019666	13647.5775469	16531.8460183	12709.4722233	6976.47714015	5246.02556385	3278.00485353	6870.63638512	19192.38767	7721.90477891	613.898988686	24532.7312128	10040.8007386	6818.34791483	13258.9035313	8244.07281875	46446.6741192	38210.3745513	16279.6121371
TWIST1	92378.6502757	175558.133025	45496.6418471	81988.1606393	21767.1828917	163961.305132	91666.2248883	217789.116238	67384.8155006	100227.130096	50346.0624601	108044.345482	1339162.18837	102879.079598	59957.7205827	73018.7388007	129948.496714	123297.508267	181524.009435	7723.75902295	44285.7150554	138530.015019	44703.9397245	84557.7723823	189588.762861	39607.3240636	75874.6454762	164119.187949	208585.29953	14395.6904164	84450.0919128	101537.12613	367457.480508	272745.481588	172382.278507	33536.5367992	66073.9587845	195231.121632	22547.0281044	69658.719313	59227.7299468	213518.74141	117445.732491	42652.6680803	42073.4920722	180078.76921	446042.662926	129403.691303	207758.82351
SP8	0	1170.67163188	84.9062607287	0	238.045631086	0	0	0	0	84.3140462142	0	0	10190.9575073	0	84.0636997729	94.3891235035	761.70027388	0	210.29070166	0	0	0	0	0	0	0	0	517.981333507	9341.85645275	0	0	0	0	0	0	0	0	0	0	0	86.8248914287	0	0	0	87.4743661837	0	0	0	116.395891993
SP4	44374.0416565	48873.7566429	45422.8882288	57177.2373598	79717.2967687	33503.4904546	54360.1715891	51475.8295706	24938.1361385	41435.2277882	33307.6445772	62188.7265478	35408.2779368	62915.7114656	50236.434621	32763.2914678	35628.7842807	31775.4503041	18311.1454926	12294.3017141	29657.5223811	26883.472077	39701.5215769	30504.4111617	8394.03583708	60125.5687483	43350.7010344	38075.3255054	39083.9844975	27436.2573433	27540.4293967	31788.2544635	37343.1701424	33062.2956556	38308.3989503	75348.5395205	11814.801375	45195.3541804	57085.4031388	32787.0518686	54579.235392	93834.081189	29544.6279349	45892.4441024	18468.2886572	37357.9238367	33221.140795	27780.6155826	68308.5928149
NFE2L3	70595.9904843	220752.191324	339976.098031	118375.256071	347439.279557	84606.6535387	149493.484865	146809.652205	100950.321695	104542.392789	187258.062092	99896.9762801	130570.189423	211325.885469	337632.185483	133057.74165	78933.8446545	207040.062033	63483.639898	25516.9093409	55628.0622178	107422.28569	102439.919794	95104.6271502	60198.738092	80540.6405603	59100.7886842	80791.6173428	111025.42226	58412.4741851	64686.5705765	317604.916427	83143.6299099	77698.6017579	191909.21191	93151.6970953	82853.4071994	55061.2835299	914820.327125	57862.4057075	111910.194386	83475.432697	55407.1961363	29292.8731654	177808.561528	86377.6966949	52338.570904	151441.243726	86470.5054224
CBX3	997880.406324	999043.6285	967110.373954	1140126.49097	1558998.84527	1182998.35351	1093286.51179	945300.207642	1716801.49346	721725.873856	1236425.4697	1253747.45168	1332035.37781	1355927.15349	701467.070293	849255.166318	755182.996867	1263416.4332	1772790.67037	1160751.02742	1387084.44874	1175344.20923	1072612.30607	744228.844357	472718.920324	1245417.57991	876353.171117	695482.074167	953031.050918	1321816.33288	1562521.0279	1469460.28692	726947.943742	708803.63791	2482734.51452	1686730.27105	1515426.71679	782540.529254	1181172.3816	1120026.64357	1646001.48459	670181.883899	891327.424169	1120664.25381	634621.871164	643344.154382	503508.944163	799616.639249	604427.891214
HOXA1	8597.53075952	7499.97535722	4600.32085995	7935.55149071	871.458897576	2492.75853645	9349.37485459	14563.8014815	7679.07760536	4568.23398248	7508.06662346	5847.20618993	6708.59010662	15242.1656874	3939.17398353	11472.2005429	10675.9752673	5856.59254661	5542.9282859	883.497557737	6298.24248838	6338.41266039	11031.1155126	7191.23589157	22147.9028493	5136.7646847	5450.18268531	10050.2455389	15313.2134043	3592.75574695	5458.11204132	33333.690722	9644.66203802	23347.5879338	5439.5283385	2685.30048495	2555.84587125	9322.0319233	44149.2752646	5520.13453258	127.14255468	12079.6748074	5411.31318385	2787.94878933	28949.1574338	30032.1869059	15536.7198722	5600.79419262	11760.7069412
HOXA2	5665.37016457	4648.27602083	642.151093143	3129.78526469	360.070649462	1373.28210991	14985.7302546	10203.5743906	1669.92231939	2040.5508467	2266.98780736	1784.51378348	4384.07215674	8845.19676184	1398.71326009	2998.2562998	14319.6641166	540.141828281	2544.70570797	0	2317.13153375	3386.52740062	1976.61961304	2242.47944224	21289.0233557	1038.13819834	3311.63878764	11948.4469565	11599.7487705	8195.45637713	2349.15691499	2519.42608733	13150.4849175	8719.21421699	1170.57926935	145.988992576	2376.06322229	11481.0009803	13053.9770933	5702.0429529	525.329448872	23949.2179977	4985.35062273	839.948024016	29241.563164	26349.8899098	14042.6221668	2686.06029751	20951.3552666
HOXA3	13984.7402011	25902.0613998	2492.60804255	11740.3808741	924.92834503	5389.39875867	56521.9126965	20759.188928	6196.08659937	6260.85639779	7968.73341444	10970.1469001	9848.80828007	15854.2243455	3846.97823852	11980.4918473	34199.7408618	3453.2950478	11620.7833352	86.8245974258	6104.7296902	12307.6336197	11415.9084933	10160.6165462	58676.3477501	4214.05780713	11720.4018737	32425.5593018	28051.0852399	30187.7839042	7867.03881932	12583.9657625	49362.3031162	44900.7090712	19377.8986246	1750.03711537	9871.07918474	36362.5524059	45193.5913939	10646.2522632	974.592267143	60025.8783337	14660.1543387	3013.80328755	72206.1279513	55898.3298987	59318.1753638	13091.9168147	63316.0133886
HOXA4	15511.2942689	9031.49375301	2891.18697094	12162.2020464	2533.06713331	3139.80084002	14212.6319061	20061.9527826	4992.80008858	4665.40939865	7722.22388465	6373.52168699	5571.38287046	25387.8918299	3935.93267694	5222.90085337	22231.7569184	5015.80586825	6265.62770625	428.009978839	5141.03037534	6511.87671016	12596.6156329	6507.45841007	69518.4855744	4868.81070697	16307.9728048	19291.6173238	21068.4805738	5439.0901316	7271.49452404	1476.99611779	22240.395595	39674.5538114	6917.33952205	1437.82862408	8357.70377846	22406.5756525	29577.5896805	14708.246266	554.347360616	59746.9588869	15091.3847111	4389.51658507	31275.6660006	46276.5883321	49112.0873315	7267.77355827	57470.1218843
HOXA5	46962.858993	33147.7695695	3698.66991669	29615.7469502	3370.15159136	13347.8676781	494712.806828	94372.1426997	13225.3543268	34157.7094501	20445.1782946	26289.1505121	29731.526858	68268.5447649	12267.587578	26109.6793618	109023.411533	15088.9110193	17863.2526785	4818.43454209	15399.5114505	34785.2773102	26453.2857576	38748.7836136	325539.878893	9799.70564342	52454.6511658	77282.3901356	61649.6036963	39411.1309057	16913.3793118	13906.7793811	117824.510052	80674.222796	30677.5430356	3994.12884082	19768.202618	83993.7508649	71770.8036005	34553.2556971	1323.78712614	287767.65761	53296.195674	11922.0742128	45345.440566	243263.236386	281645.712226	30049.8381028	281661.557273
HOXA7	8117.3557339	10606.0859075	916.536848497	12611.2462916	917.724654063	2275.08588449	239692.677321	13069.7859889	5745.85569518	1430.22640484	2919.38581353	7277.20428005	5622.96363561	4689.16494945	1685.24880333	5531.17914769	21814.3159553	1211.47696002	2270.02314451	1240.53659566	2453.15941947	8401.19117382	5571.30205715	8001.68006704	38063.0399257	823.181060909	7596.44061179	14378.0102711	16341.2078604	2364.68447779	5588.21980911	2568.53974395	47262.4975704	10213.107843	954.718820092	446.504699815	4171.88039569	14347.8333922	16592.3546664	8114.25623652	1874.49574809	36726.7141604	8932.94026343	3669.95125265	4721.29376669	31245.55251	48675.654074	6740.73186232	54386.6684814
HOXA9	13046.6337635	12214.1748373	3647.68957036	16810.965321	3652.41687181	4736.21378712	451929.663998	17197.1053662	2540.85654985	3622.24722148	12199.6882738	11584.9055921	8033.34918677	19236.4486487	6397.5001046	11817.6803041	33391.5202835	7539.08886079	9550.62748913	2715.4400011	5424.01907519	17130.0074126	11228.0346854	12510.7624545	156642.578412	4118.58414684	13839.8949888	15577.2326347	16430.0820426	3764.44653413	8006.52239273	7326.07628686	71143.1537959	28753.8142085	19568.1898935	2843.24286895	6320.04403035	15327.4829433	171691.704295	7519.11028874	532.873797181	70797.2001545	17285.5612726	5063.37766531	7301.29387786	60508.333696	56651.5791139	8551.16303362	153730.498792
HOXA10	15229.2009979	15557.4270129	9111.92826562	24903.195621	4894.41595785	4211.44169031	226554.164883	18909.215814	5674.78525436	5073.85417574	13528.541752	22117.8098772	5532.57492202	27096.2235284	7082.30434407	13916.3738587	22154.8548504	11747.3780783	13287.6267096	2723.06483569	9100.33443729	26646.6507406	16344.413175	19887.5623208	33604.7690961	8260.29789541	56762.6680386	17273.985806	27129.8202454	2768.34575039	18795.7056589	5846.94432947	26159.0708879	39117.0326262	26234.7434392	3194.42976634	12954.0776198	24802.6866467	37320.675629	25678.2923888	435.412660281	44504.0470993	38165.0676238	9229.36144714	8948.86127166	49689.354793	180904.084123	12330.3160137	77282.7276227
HOXA11	4241.64383928	10848.3760217	957.854504432	6828.07034008	3260.9259121	1097.37562619	7805.8888335	6690.10992687	3558.44738713	2853.52063299	15763.4601278	16965.5845439	1356.10336355	3958.13928438	5012.70347766	2738.14378039	2981.23893188	1611.38800128	34907.5272491	1134.40269424	6646.75488809	24295.1168739	11521.0327602	12991.5815671	507.816115214	3809.85668917	5998.27214478	9600.05542989	3820.05045613	823.761635015	2669.77729093	1789.55333699	1839.85759219	10278.2012594	23696.7460065	777.72202807	3234.80128616	4735.14835516	2528.79975532	1518.8146487	139.92845528	3430.82560352	11589.068997	4346.77913574	1409.75159719	4579.53953327	23083.8482314	220.143916884	3939.29711966
HOXA13	666.000567432	1497.63566119	186.206140812	3313.28352628	0	248.883756353	858.360349331	1454.08934178	201.763127264	184.907367572	518.971627735	1194.13817472	751.820576242	1880.89996104	61.4527793464	897.012169764	5568.22968597	156.626261964	51037.7104114	0	387.637132019	1036.55526716	15396.7927694	474.145955604	230.344431341	111.493148579	2640.78124872	1514.63200785	2242.40522831	74.7313445529	1362.38168235	3855.75557513	449.376270551	2331.08634541	4186.37444868	352.773243956	127.59128327	3042.7936712	81.9327711298	746.342412656	63.4712831954	5252.2290606	2336.34658767	289.95453107	191.838199059	2257.90270462	7368.33369399	299.570595508	3658.80393954
CREB5	12057.5857399	33322.7508355	14872.7781878	10512.4088553	4814.19455028	2710.77348126	15893.3425826	9777.96042212	5933.38105237	27175.0367749	5878.59621082	12110.2404728	15722.1563849	7412.29610156	5354.61428397	9228.90180608	13203.8549226	3889.52086653	5826.78534377	2369.89352597	9720.06768019	11693.9338146	18434.4992375	3482.19176882	9700.87989155	4711.68861625	8715.95869026	12455.201486	65721.8528624	3223.25494442	10288.1562531	8001.31080037	45560.6432229	18319.5382133	6211.02902776	5901.78697964	5864.48840482	10293.2893446	15884.5282607	10079.9060163	1023.14142661	52502.2446934	13550.4449667	6543.59371185	19863.6946586	94356.3343752	60781.7436141	8396.37648935	53492.5966969
GLI3	240956.267639	33919.7005267	22004.4237946	165621.469435	13123.9691443	161030.816439	269307.389179	99536.1129895	139058.492922	62736.6408108	286896.223695	536956.894583	34689.9626446	72761.877191	35317.7816353	104951.163238	123355.164577	68459.9337232	142933.536075	18128.8330987	124288.591851	271553.092684	219659.809719	219177.00136	98694.9056955	113423.105962	194359.324135	180412.07431	156996.696953	145467.656094	118496.977093	145619.091931	224902.174931	170622.295591	134723.778649	366803.103452	131134.423741	233667.386226	27107.1278768	87133.0516721	305030.250187	229404.236742	143726.281496	392595.911815	54105.2103978	170384.744863	62017.3507682	135172.344189	173778.474625
ZNF479	0	12323.5051195	0	0	0	0	0	0	0	0	0	0	0	209.556565211	0	0	0	0	0	0	0	0	0	0	0	0	0	0	0	0	0	0	0	0	0	172.935394579	0	0	0	0	0	0	0	0	0	0	0	0	0
ZNF679	0	13888.1848351	0	0	0	269.26670598	0	0	0	0	0	0	0	0	0	0	0	0	0	0	0	0	0	0	0	0	0	0	0	0	0	329.331489187	0	0	0	0	0	0	0	0	0	0	236.970699284	188.220643908	0	0	0	0	0
ZNF138	169429.973126	54025.1608346	42201.6290826	162857.918677	94250.4507757	77577.9110223	122352.265384	109550.40334	206133.599777	128801.627894	112268.353265	180070.589802	143680.65815	151503.882001	61632.4370858	83732.7570549	104478.856695	164724.077853	189292.621703	112422.377563	265329.259622	213116.030921	69092.4223964	111690.819504	46587.2285909	97891.453897	144235.231955	94603.3837603	83672.1144489	37608.2738202	161948.514825	143954.260571	85005.5920963	96319.2294462	314381.118961	108281.828641	122271.935517	112753.435706	69013.0368112	147225.498596	184854.032426	124191.259747	162865.388499	127290.64957	98710.0648605	95093.0380614	55538.2539188	96584.7834416	91411.0441092
ZNF273	31494.1941932	35655.0492832	18133.8065491	21255.1577101	37030.6777172	25847.051778	20593.1456676	23599.1752553	13758.1371672	27536.3516073	26202.362165	35332.1544249	27441.1350489	17539.9474817	33776.3709468	14967.2217843	29412.34096	16849.0538382	40846.1736714	29556.7307093	37319.8758975	18793.0090519	11065.8391665	18714.2192589	30466.3257056	30476.2114491	39326.437847	23260.7264781	16597.0549035	5886.63948972	40933.0365332	39187.8207832	41246.9749231	12174.6598843	71699.3061463	25921.8203704	21413.4657473	17413.3137883	20132.3174893	15895.5486288	28841.4185754	33562.0009082	20386.4095867	18817.3654011	21501.5470025	17732.5636339	10315.5909728	46959.9645171	25659.4824617
ZNF117	68401.0733371	226767.778497	45088.9174047	64727.7862072	391324.350734	47636.5822114	57576.7022612	50347.363726	56630.6881027	80576.3732363	54809.3455338	74703.0547656	38074.6959367	70444.7984015	49757.564162	79109.7572218	85220.7817574	12120.5178859	62455.2565496	64100.4294615	92163.7929683	55774.1940876	53945.9555089	68700.3954728	14976.0867053	61235.0594345	193925.738777	43683.4477607	51447.5652573	20620.0073585	85444.0951897	132503.171599	94888.0179758	57708.639444	139410.06746	57093.6718101	78422.6557468	132705.34513	35625.5736231	54323.4794825	89799.9860061	121785.002598	125769.067777	64996.9844406	43410.6044882	49324.7768881	240575.447615	81280.4246382	79298.1662967
ZNF92	121954.042401	154452.571752	84673.1069763	566294.651379	62120.0815197	258787.232202	402051.667718	103915.65162	609213.766536	101488.135617	207264.408759	168801.261254	101750.484453	217786.374225	118629.7261	110517.730601	321860.255511	587621.894495	110199.632757	334478.708227	583198.397234	207312.047611	75517.8342527	1001034.09127	62490.5902737	179141.965689	879477.815696	99390.9868689	121777.544752	64393.4376269	268543.239517	138860.765706	126250.676575	90627.9765707	353761.720917	809742.16379	94050.3977094	208401.806978	105482.703803	156056.150949	179974.847642	298682.669278	155744.20141	250515.728155	78251.4495965	114967.725329	40155.3647567	124365.015369	207631.115044
BAZ1B	560197.453327	517456.281193	639598.512958	438790.429616	666833.280872	528368.393376	489646.79626	461275.514786	378283.693419	545444.767273	438729.867677	571487.926295	560480.936212	379466.591119	939640.651263	462843.096066	371818.162276	635729.823183	291548.841581	341319.691995	795386.021873	393327.639957	364366.525981	317929.446503	243397.783223	619876.297293	406711.877008	317494.319268	428584.963276	289117.909073	521942.808893	539330.25258	353863.074086	414683.19891	521199.183207	804072.348653	377644.998612	348683.203014	506988.394258	504703.798207	625811.535687	456001.149419	437986.663914	541792.896654	396842.016449	373834.672984	507149.167294	305745.72253	414045.652
MLXIPL	10083.2808651	34011.414728	1704.61441581	6847.36286658	8455.3412655	12969.3161753	3230.01534257	13489.4638606	6393.56551567	11914.1788494	19003.5949228	6867.33474271	7652.57248714	15171.6341916	5192.9193895	13046.3215477	15208.1973864	2040.44605254	25331.3165708	11491.6456998	2320.2410321	5935.48416839	2136.79208746	15955.0782268	32035.6560907	6241.71757936	74299.7627733	8899.32810073	24655.1110637	2131.3100097	879.42547134	5573.26003425	40889.2808293	662.923045525	8724.47437656	30480.9856686	11320.8844037	27981.1373103	1990.51541043	2607.61391426	45589.6497416	91539.3168301	62004.5277187	1653.87896638	55792.2589423	57621.1893338	520132.47556	12657.246511	77384.485287
GTF2IRD1	138197.178994	174072.14273	51496.2089924	111287.033699	238833.731373	265514.997799	121897.093323	85507.3883728	170001.394438	299489.305125	144968.381931	133915.259784	183061.988871	90807.0386898	110291.548228	158727.149758	104536.13677	98195.9888961	253280.554719	118580.994573	69176.2264368	173962.858545	79299.7973039	165411.329865	222178.772059	170212.238648	97772.7970649	100545.732897	69886.3198486	98618.1872293	97451.5703462	137553.116688	92353.68981	87087.0226021	145502.534804	115140.561361	166326.822669	151021.57409	51174.9213643	125370.576213	253462.889533	63795.5764391	163665.429004	108390.411915	43544.1417851	64752.6188405	56154.4350166	148109.798522	75789.5962263
GTF2I	187785.531904	189105.638747	189172.987265	162249.634171	204559.488984	155468.94138	131903.395271	112623.366638	78648.5736934	155838.835795	167402.010013	199058.544886	126717.106291	41283.4263228	213735.733821	129509.111716	113797.89165	86111.4822399	24643.8218688	75933.8416376	183632.682588	101067.154313	116749.750469	129443.623944	45979.8350551	272009.977719	96544.6453088	117206.278345	115421.470638	69185.5599686	134720.915739	252790.503344	108605.263955	102094.603822	35669.7192393	233772.601793	94280.6316311	122883.518896	153461.728715	106161.149744	113068.733837	155494.557288	189935.557096	140661.048721	160776.510664	130129.452621	228218.998025	109476.148359	128526.132586
DMTF1	109388.249512	157726.464872	91449.4074884	85971.9601285	99811.7216814	132716.260968	159445.755774	78328.6162024	57644.9488505	101064.472542	143819.84624	118238.742563	122331.362235	92488.5032646	104813.552439	88433.4374317	172062.174506	103343.00669	66089.1175218	56336.0805708	130685.794526	97587.2265392	94021.0074736	97310.4391502	49886.8262608	125911.674135	172057.833734	136304.777482	104594.489093	76686.7234738	85925.642414	119685.714848	193260.387245	83093.3142277	109383.839457	179477.630357	113839.986047	120981.293141	122796.055565	93640.8825489	176542.101902	201324.137614	125197.254682	98345.2364739	74322.4275618	101898.417765	123994.144628	130567.925172	118426.497867
GATAD1	234962.572136	229960.555803	175136.999979	212337.565729	197386.731755	401156.528547	281223.06405	140134.134138	215471.565196	156903.389257	323944.884745	270012.811347	229638.880888	245868.112179	172485.727768	142763.440942	249278.968816	195145.948219	152259.685503	203984.052801	205249.757498	257083.492888	161956.998896	217515.181706	135957.350961	346730.357583	307862.549566	226913.988845	187083.97755	148749.067938	228028.36157	275211.760235	319211.968963	156852.846617	454023.4995	331053.427548	268727.961835	204639.502435	137511.715078	149317.613175	263049.373926	307330.717847	268094.582281	250925.186588	212067.952912	210066.973109	241762.476241	230667.81619	231600.177702
DLX6	436.490948869	64360.8041441	38991.1015853	4354.79572277	133053.151879	244.674356782	158.220525395	279.684031627	2231.44519846	181.780008016	85.0323668264	293.485394638	302.361115272	882.519312753	26189.2181889	101.750873061	821.108036615	76.9886119985	226.692035017	325.195752261	444.594477438	321.797017521	662.90737419	299.652859653	2490.93448455	82.2055891087	118.005336909	139.595143373	1052.13778616	0	1562.56282514	149.626687027	378.665072613	793.267066447	667.389699983	208.084049726	0	395.911396613	25855.5975149	253.979805346	93.5966791337	1147.42166821	1184.30383983	171.03029806	94.2968087768	932.280105422	857.808025995	0	752.844174713
DLX5	8142.97474784	175135.873856	156591.339708	13338.8073995	712246.346162	2003.94108413	9646.98513716	5090.39696612	8393.45256549	4962.73810804	8202.45992547	14066.1845141	3485.31684167	11932.007064	35955.4861186	4444.60700183	9820.73685949	3783.33008714	10314.7866593	2170.20257608	10403.8124193	20938.3300291	9652.21122356	10725.8856752	241312.878066	3441.22573468	5154.62256887	18039.0074481	7112.65765821	1404.00281202	12188.3434238	1361.64233128	9993.26100998	43554.2689801	76221.4506445	2461.70568273	7533.74346576	18735.0704907	118525.978822	5084.82313194	511.052685486	7961.90294701	10385.5691537	12295.7246287	5492.00537787	5090.39696612	3903.13968556	4556.10779751	7992.9274011
TRRAP	189406.526029	243633.545511	163787.53003	166926.097759	270075.951203	186933.429865	177008.614282	191714.601399	137606.40624	338737.287569	172620.079148	219094.662717	238948.80514	105763.204803	207254.542699	235074.276861	151966.88536	135137.339473	101385.191445	64291.0460463	201623.561883	142555.244933	123611.393455	141391.844902	100301.366461	237666.818833	99055.8563565	144679.498849	203588.411454	88335.3665995	141974.882852	372269.284257	183087.255491	135267.188403	132958.463606	177981.63317	137267.833993	194594.02576	195177.187768	128235.302967	185268.133067	192289.073426	167265.637216	195846.855123	145219.06876	154366.969277	139296.631842	131175.296072	135642.63695
BUD31	323727.05952	555494.874869	433283.102943	383104.344507	467617.597532	403688.128769	341264.661746	479681.724693	758096.690298	440925.350772	332569.05065	350022.522957	508939.156404	578920.914244	359411.470936	317480.928851	345440.648586	553706.397991	1301021.67308	644570.71453	347861.607938	400297.210482	269591.635889	291255.909444	401991.374407	408083.701099	318967.979615	281679.489183	365124.890348	301704.342196	424235.572646	697475.406704	291261.826384	519962.240974	638053.704183	458761.794532	524921.364	307203.687515	418110.191812	426767.141714	404298.265419	256898.151673	349343.180236	311416.865602	272094.728851	370217.676032	318100.146873	294143.431504	298260.831278
ZNF394	93527.3390291	199932.010698	167522.838215	122494.535367	157946.09474	143255.265233	111709.446454	153478.494204	178737.550769	101511.946659	97647.312675	138333.440629	173956.012882	222439.36147	108344.318243	91113.9151724	138050.700447	158941.440912	179571.459961	166720.022229	105497.857075	138695.157227	94259.6600863	108313.836392	181272.677364	126515.363244	125874.020311	127062.446728	146276.99894	63112.3155225	96429.3279697	171824.499752	140103.267939	119040.417149	156136.772365	139134.049232	110160.603051	112850.034771	164900.676916	140872.658635	139441.320612	140218.753958	142812.268082	89197.7899985	113760.800056	145864.199513	127740.871733	135335.93814	146805.007853
ZNF655	145779.014336	228482.04894	138695.433049	142547.977953	12747.4696372	124608.432691	187465.501817	105637.401152	100161.547139	117316.97861	206176.859372	179167.680576	218846.93094	183124.400668	137244.691716	105812.151183	169514.610444	170679.931321	106748.526438	135955.578973	225733.310578	122303.235134	38747.9559092	128598.361615	77488.5320633	191796.735824	190831.401402	159036.022777	143654.674895	79627.0882487	156985.311987	87965.8872958	200737.167898	107037.829568	211797.682319	198065.165597	114553.279673	162431.624169	164779.296002	112924.93579	220717.658818	252140.106873	105861.533203	175258.803837	140954.804658	174312.647449	164932.933926	139950.448473	161905.064727
ZKSCAN1	368923.839859	524719.5529	250642.343662	441169.836355	508397.669171	453957.572018	255241.162972	251650.796193	264174.177747	975070.790376	658145.846947	390315.694426	367826.59915	257889.216165	451725.296682	557441.344569	474868.877116	365350.111064	252462.475188	280861.981435	519421.685898	352517.187835	451944.779206	270719.821018	207119.340372	643987.559539	457998.713644	430839.746044	224160.82992	171054.203298	469779.690467	517562.770458	391621.232563	275878.013928	684090.336563	671257.557635	259030.879889	434566.989856	270807.031303	237634.440542	399803.761423	547774.569037	401021.020245	789988.855581	305089.973137	285384.075284	245329.797985	616297.450093	296880.271267
ZNF3	151267.370768	279056.368183	149168.810204	160811.402602	265401.875387	220694.39777	160219.649318	167470.525188	252568.823586	199450.25476	172808.281648	241736.120701	293588.127581	182221.294414	140716.124063	202061.532298	176403.38778	232586.784097	237124.089847	311073.09949	276043.837458	181398.740829	135363.158964	136555.483827	116274.816934	180811.238712	155401.519708	130751.46676	120234.397819	99435.5926445	138039.243741	306364.503733	138210.377866	147374.927195	263432.735427	252657.368029	187356.790499	170099.881442	216882.8427	149710.559585	176643.576828	157096.244866	175739.681267	151657.916293	116264.818518	168275.061212	99728.4332036	172567.869829	136434.268842
MCM7	441822.715161	2230722.73333	768155.863034	493260.639669	1164974.3193	589101.47838	571824.667387	748044.68332	882195.085695	1267352.31551	596113.001619	786649.947407	819156.292394	353156.789795	1156509.06105	422774.413692	587168.397005	868749.834306	1646951.42892	618708.083406	538182.736957	307955.069551	180845.574231	385963.516004	756363.917329	532413.051966	313762.337925	447771.071333	418078.627379	433366.368638	415133.671221	1427141.45549	481904.065106	247383.477964	400734.084503	560469.146703	950761.992655	391254.045474	847668.269905	539789.39195	894786.812719	378651.177526	255116.918289	410847.738356	315592.159814	517355.166468	334163.740907	303658.148764	356506.581746
TAF6	236079.72439	344071.451816	208909.132369	226829.368773	409602.658887	353682.740902	211149.240844	196970.913149	201164.948477	245428.613954	194943.547657	242116.304597	347784.644568	155159.55814	264740.949719	206131.430946	230900.908113	241163.887726	179487.385558	261779.901114	216913.576077	189122.001279	116738.479367	226126.144242	210355.803796	216982.175542	158576.761612	240731.824747	188533.365204	119810.988863	175798.807027	466805.38213	239004.733468	184697.49452	111119.772538	208489.57427	280233.894055	241284.838423	247823.171742	189516.175281	272330.670584	153029.431894	264640.711156	198288.05299	186095.69832	174588.110336	150125.361918	230195.539427	174968.036824
TSC22D4	210824.805195	652737.116973	408389.012203	328073.46696	325909.394865	252823.824046	185891.421342	354952.763845	442094.403245	406553.116443	128283.857046	260119.331106	788986.655791	319772.600948	175582.61648	392409.048174	417748.825524	336080.63648	450595.971575	335523.992695	137095.549702	208158.125486	178478.21931	281442.865302	948472.968244	215221.091972	283749.947276	348105.346579	240712.173129	235723.460776	325677.84032	440215.850236	446910.533191	162391.163859	426751.924111	279538.544069	459490.830708	409220.697991	535049.004796	224004.719033	382946.290306	230097.115497	374331.737884	177123.833655	345627.679629	280183.565985	195778.61487	415593.78988	261403.304148
TRIP6	559578.630932	610905.369418	527358.075216	623837.899629	672123.640843	257976.554877	378495.937243	403711.840064	447345.356575	93790.102165	308657.913841	341448.373526	1377121.13591	346517.012336	342252.526588	127973.444769	683115.188964	153562.79709	2853888.34719	1126074.44323	575056.296994	387832.206462	226745.530653	416529.604478	1641766.46181	458373.764135	535360.971827	612633.260444	462019.429997	322288.432494	220996.488886	784175.138624	733340.993132	295651.277873	335835.030865	516852.214654	1339315.99977	795138.870531	665181.339471	196511.413657	556773.402685	364525.560015	829846.448998	465200.273597	685145.975158	595325.001047	416554.717586	639621.990197	465510.149656
HBP1	269695.16979	167135.863553	315085.0079	345337.921477	415631.007738	308998.15106	302409.1124	268788.215239	169977.6355	254100.630365	326940.412997	387084.237906	227692.694281	205672.955114	199163.145694	259432.763938	266210.827605	204993.204661	78912.4218616	373513.512249	291111.62734	256979.290143	216405.713057	290691.284242	116212.410646	247946.68316	315872.304536	271548.227443	221531.507551	221311.481787	330033.798461	218093.46536	235611.34364	304715.559441	135279.004225	284823.99582	137428.72992	265674.833068	206419.444607	183397.347122	182933.552488	412274.084142	277958.981229	418008.295196	393850.035032	348543.015698	453732.767239	237022.934368	354398.421881
ZNF277	115234.616366	103012.687368	104283.417792	124210.377699	138799.52085	158622.038057	66819.3383186	113669.680235	103025.761809	97152.1305525	134802.039917	121716.547966	120374.725655	208207.029284	80122.7583439	102903.567991	96053.0123933	102469.291627	160696.358679	91836.7171112	122681.239976	104172.023888	69704.5906632	133114.325509	46600.5415683	79746.4050193	134348.664493	102433.970271	102931.600466	133512.182845	140303.855186	142964.981872	85571.0425315	138366.606072	116553.650484	83854.7098254	113974.871208	114982.177762	113468.886608	67142.183175	50424.7561909	111777.958446	89086.6371709	139976.091643	153135.057464	137094.812163	104049.043338	66678.7624725	129590.790127
FOXP2	4173.34660473	3619.77647294	2860.37582478	3992.48720683	897.279083896	989.216471042	5705.29259247	7049.42461618	2503.32275457	576.030230066	3512.18373285	4254.50923194	1079.27450771	3719.55600239	970.402544166	2957.4740361	2717.31060284	908.555381464	1089.90864485	47.3788767603	5690.90106813	2795.44082238	4110.73873814	4125.6286222	4577.64919725	1886.34793231	3507.2902897	4332.01357421	7752.07090333	264.91698152	2853.81929014	653.988649798	7840.89471601	14215.5750347	3901.52542534	1227.81719444	1644.73264912	10671.1107709	554.486855486	3533.80396633	18838.7128103	13493.8963862	3952.85505073	1476.39070912	2246.2322005	6577.9106658	29775.7638155	1158.49655209	10803.9165514
TFEC	16501.8599643	32792.7212999	25235.5276349	21317.2094425	9419.82142374	11031.7734601	35195.4182194	116319.555523	16085.8010693	30716.9413905	35455.1228225	29431.6778145	22640.7867862	24649.0788614	69531.6301664	52981.8467547	27146.178003	52805.6998454	8411.96865755	2768.1015568	26812.0566064	8378.01178289	22747.2938325	20604.6931433	5827.84202283	32341.2422212	32912.2263412	24229.1401585	20390.6904264	42607.7078003	12647.5448555	55462.981266	44722.4302743	14665.3153475	14646.0538105	40641.5182708	3565.95790938	9004.32776427	101718.909772	25740.1657282	4406.77506562	13362.8280803	22810.9519375	14057.8436592	40672.5241372	8130.51852302	12492.8465618	35076.3065366	8711.27107808
ING3	44320.6162038	47269.571794	57275.5423111	39415.6742225	47274.1548334	41028.7784106	51074.5809242	44278.5130807	38574.7571906	42326.3627105	40554.7473199	50863.9346068	39668.3208356	70636.920267	45677.4478032	38163.0758712	47642.308993	48686.2752168	252972.615677	42162.1843711	73985.6591341	36985.2871995	38149.9761069	33498.649499	26063.9981252	43448.0503245	53392.4584557	46724.3204151	56970.6753143	39582.93149	28941.2767836	61662.2367348	48468.3667353	52211.3199389	41608.5926048	33447.7749642	32359.34203	40767.6611706	53867.009945	44297.2312858	29161.0739782	101517.053774	62387.3768971	40162.7621391	52520.7905452	66778.9751595	63835.872015	26494.2823975	60921.7080936
SND1	880634.608147	559554.699925	891921.589578	954722.537285	1292586.82461	839662.447257	628649.386085	932624.288894	976832.300588	825608.873885	652653.30754	1154981.66953	1075893.60322	1173973.75969	878983.495017	873729.534196	864849.724969	828669.471792	1332651.71107	1292773.58775	649793.579914	719158.20029	802778.815925	684125.79583	790573.67508	1053106.80247	703672.39598	689085.589423	777126.450532	1257492.03286	1344595.54496	1123110.66562	707458.731783	1073134.79954	633445.104744	766925.906246	1384515.54934	733587.759532	1052096.7729	505865.110873	660678.035547	461081.831846	644005.827073	1039510.85045	1039534.17101	917635.419243	894704.900622	784779.466344	796810.892234
IRF5	37593.419001	115902.378362	107223.468663	48900.3440922	80008.8505366	44267.6311031	54819.7232508	183004.13413	58169.0244081	66565.158979	51549.6527814	83986.2625776	93518.2311388	81201.37282	59580.7380618	72273.3311609	92750.9427965	85213.5649799	90785.2116609	24354.7461044	53575.3403223	53844.9342001	81786.6329155	64411.8262239	133086.009958	95913.1597068	75167.1608814	95192.2415572	34718.210768	154900.363794	65375.2560595	116777.558656	153438.203295	38564.2629145	16441.621966	133119.737533	46277.9271345	35372.9111126	158302.204099	85028.1042412	145580.317512	33468.7820218	90393.0825951	70448.9434765	116785.336787	51131.9640396	25471.9639335	78821.7369223	29674.9663838
NRF1	94706.949054	132950.835889	105609.803345	144668.592695	119509.063419	125508.247027	128455.082889	95956.3480464	106721.395587	114448.560844	115604.316499	119995.398949	130703.050317	109735.247902	105622.564132	95625.4951693	130247.554947	111491.977663	109934.371076	123534.626572	96066.9122772	115830.894965	86535.5469528	124354.387036	154689.529287	94096.6225911	111592.111592	134926.540319	113860.219614	133973.716642	103679.466205	102586.958477	115246.003418	93852.3400904	118439.465871	123789.251626	130336.459993	122039.696004	108294.108919	126494.524042	182889.340504	145586.460699	101812.78061	101459.961658	82154.9916598	144207.34678	96945.7892535	87908.0289949	141420.698383
KLF14	1464.45260958	33102.2208126	4466.66398853	1555.00776807	2191.50180214	895.523724662	675.613396642	454.960606099	0	443.550935726	829.930337982	835.469624189	491.84930389	1845.75821498	995.026360736	1365.52047154	3148.41758564	751.421925102	829.707282037	0	464.926884436	981.497977918	808.761066	974.887596222	5111.03357842	601.755380621	1871.59720234	1532.78133903	3300.76396182	0	953.179905184	4928.78881358	4042.31997174	2419.50664324	203.55739965	253.866957023	344.320445725	3703.15568437	884.421805375	1652.59068249	0	5249.54545498	5254.09389145	938.972671044	345.132324165	5199.54978398	37152.3119203	2155.80622392	7500.96795016
CNOT4	94642.2638042	72915.748418	72572.0098756	70084.4563497	109256.516518	93563.6977676	93133.5542575	88023.5991453	93981.0282947	109599.176954	85355.6939272	98923.5734044	69632.1649843	100149.414913	87526.1777512	107753.593055	82255.389603	110857.19931	80543.1715309	92465.1073423	96148.9256719	114135.537676	95387.8153744	71321.8760326	43408.6642438	115655.065633	93856.0732817	70854.0590055	84734.0185086	120177.889343	87340.7970939	108314.863492	94419.7760728	116230.531793	181294.78143	90851.0004755	83584.7598141	78754.9921788	130746.581287	64164.0055344	115492.016805	121391.144638	79476.6341614	116602.917488	86244.650819	105468.180604	123714.489503	82359.585433	105052.023861
TRIM24	91856.8888443	129956.133463	56475.5977114	115186.853383	207516.917697	168035.241194	136381.272337	110098.024894	174124.663357	147035.980989	144046.747081	138688.35878	114275.956894	129652.190202	221152.954802	163730.834803	112997.570804	172627.149713	87400.9014924	86990.9979012	173218.081042	141276.880664	93116.8605444	123262.819499	48353.3662311	190934.259376	90552.4054174	82584.3536268	107581.475684	120622.872281	158144.846175	170435.455174	73775.8050813	112330.446906	245643.857617	136058.417033	99840.6841008	101515.422423	112321.505354	94375.8536735	139514.29861	106976.426488	116597.703178	82601.5979268	88051.4523037	81679.5262946	74795.8591644	90748.4639253	91779.0757995
HIPK2	147129.565947	162563.854531	61467.9100565	184237.273919	173338.810185	87034.562337	101207.599941	112024.537674	95940.8428763	181855.631663	186225.520877	241260.905333	115374.970856	117078.267923	292053.164796	228832.487897	107145.033122	44393.5421481	15736.7132138	3422.62089525	286118.088531	106397.528839	160544.5064	154311.89059	29867.6456358	155680.332996	175727.354016	201063.121254	171623.06956	292256.219495	164181.715543	153994.480625	151571.439154	98737.03636	90790.8030262	471837.864749	143462.157716	214077.618918	134006.297647	52438.0076253	195047.12963	307305.477929	142124.953945	275102.789651	119411.36973	186399.382478	696456.593793	159134.550736	212052.925904
EZH2	57511.6642144	222344.249538	93755.0252397	72181.228838	339577.198986	148080.551341	89964.9010175	92011.7581641	126512.21813	281590.940286	135677.734768	81405.2895904	232306.7239	85388.9710432	654403.4447	120911.674022	104766.345328	170935.132026	322980.103527	55972.5269971	159085.943711	85228.9043429	49107.3522112	56756.5620775	89035.0333858	124333.08124	42752.1435925	43120.9150918	72796.5738149	81026.2291318	86064.3402877	180656.092028	61517.3314792	54554.1854153	75972.510168	142203.222292	143720.181471	39960.4059816	128551.648205	86977.7489029	201027.618061	23519.8288019	73658.9513363	114728.557386	34738.1561138	32708.9712175	6542.63574006	57166.4874552	25169.3632577
ZNF398	95383.8395852	83578.3192796	66208.9772972	106667.994306	92226.6639116	90590.5287148	109574.117564	94637.3415104	104298.411004	96155.8918965	111950.987605	115616.533192	140576.429824	123517.308682	189929.94141	85105.9899251	89406.2515764	88218.2058641	115965.453167	107933.04976	145881.565418	147484.604371	77114.2832258	80693.3917572	69879.4819733	113063.520625	91964.1707591	68939.9200153	87358.8110414	58953.5425322	109602.953583	115411.415534	71289.3100045	109375.718274	114214.975303	155571.003424	114027.216787	75496.8495135	88018.8800498	77529.4412192	124455.555373	117180.960198	92572.0289988	104384.283955	95345.4373675	101207.055721	89216.1289701	60867.2967665	99647.2533795
ZNF282	184351.730137	319030.397478	174728.709171	218538.446228	329239.036317	228698.149274	181853.395119	180238.841638	277295.46012	328613.687083	140439.097571	233158.317844	619936.707311	112905.982111	290526.866639	177942.070194	265737.700314	158474.849688	344410.511213	174640.245972	152688.949002	209912.321962	168404.811157	186994.227812	478049.371056	162406.558887	142428.900258	222513.602102	153410.585168	143027.290639	241999.208806	240927.899666	242918.263756	151364.133555	160082.702388	272408.221653	451049.870011	268443.493357	151372.761733	146681.843348	399138.104311	150844.496816	272588.718761	149702.949325	208870.113683	201024.565993	157116.650813	287069.620877	160478.041612
ZNF212	94978.1739447	182781.409848	83831.1905701	114436.175324	206243.647456	126237.512166	99296.6061655	119239.856023	140606.199766	185506.641	112259.880333	157995.430327	194235.880906	98663.4720837	223066.752357	110509.31449	157022.627215	129345.465215	216965.151416	146867.817613	114210.341165	140391.533675	96013.7843101	121798.716956	164574.07438	97122.7258803	101046.612675	139809.054724	94329.2020727	56021.1241445	121702.766881	131853.792147	131956.031142	100886.68505	81562.2258747	126417.566922	170083.912142	133174.001345	88527.9729733	70107.4722774	218929.809612	113410.006478	166761.464355	87592.6941575	96689.9088698	146812.268251	97472.5930003	127526.631359	130290.386399
SMARCD3	220113.030938	69395.5698203	43969.4862697	76466.3901496	25369.9489804	86693.5189289	61205.1964577	82148.8353794	43925.0127975	74540.3645723	51230.3160699	84969.2538203	245630.635256	107494.495299	53995.5472313	76966.1769435	183450.442871	72181.4448426	620916.02562	28554.2682679	40794.1886824	57650.449524	54487.0677611	35855.1345199	179478.608257	182236.237728	80256.9098067	109204.625386	83874.0265975	163133.234444	45545.0818736	261208.212581	139634.147854	91058.9098512	66867.2351599	259776.543158	168786.52724	131260.876746	113837.68854	50275.6721836	216928.166129	100782.688446	113228.730465	66273.9443704	153229.611256	206609.269704	88696.6842808	58720.8699052	96076.3668913
EN2	0	0	185.968469743	2265.98296925	23201.7011539	124.2830422	321.474281053	757.686971099	453.387598791	12188.3093799	172.769739726	0	819.121049837	512.317965022	10218.8279142	206.738592746	9652.51971728	312.852692528	690.893221301	5506.13720936	709.760987987	980.746315254	0	1826.5143675	2760.60507287	83.5131301431	239.764599117	141.815507951	12521.0816077	0	226.773792717	4712.20493379	577.032033332	1074.51275883	3051.02263287	0	16820.5524213	1206.6259855	736.453738968	86.0065143484	1521.36646283	364.272582259	24828.4566927	347.501324306	478.983348264	1488.31369323	4066.77646963	299.188227542	1274.69786872
SOX7	36161.8703622	32312.5937234	13644.1932081	39298.8806312	12659.3495626	17187.2703991	38263.66123	61289.2130985	36056.2503031	32069.2774373	49608.9827277	27488.0343118	13835.4028069	73147.6869376	12536.9402402	16695.7806161	44533.074488	14696.8291839	5591.66637493	14182.7547932	24998.2290083	31318.8497027	32258.6837177	44669.4269587	547030.54094	13400.5334823	58468.3420504	35181.5788654	343990.261239	12409.4464961	47280.6786968	76703.3109514	77869.5697904	136118.314039	100024.979405	10711.6699627	23709.3248876	39770.424165	30320.322546	55111.6960638	1505.66672729	151665.614544	53113.5632643	28246.9087977	19517.8267537	119550.387703	203463.697293	16897.4831278	101865.442882
GATA4	10080.4308258	12735.3685922	0	22509.3761755	0	36087.6778624	122.823000695	0	923.850790245	1058.33769016	0	3037.68062452	0	38266.5947039	70.346350609	0	2731.74652097	3824.9287099	0	84.1473591077	2613.11651369	249.80371673	18203.9728788	155.075806579	10107.7466012	2616.38760978	0	0	15868.2987212	85.5466167896	0	0	73.4872741077	0	0	807.65461119	0	0	375.160993892	131.439170026	88496.1973064	0	48474.7219787	66.3834681532	0	206.773678248	554.914074885	0	194.805278609
NEIL2	206011.120576	188574.182045	133791.941858	230767.517149	111978.870691	286599.020776	93435.564104	117367.641483	162138.69472	104927.691135	121421.92654	198918.798666	96530.9038656	162980.486929	97189.9706077	76920.9402303	178074.012402	79415.6396918	138631.10032	306133.215751	116067.585947	92462.3566133	150070.455872	90550.4307451	380768.124593	278727.242152	151945.20689	153290.475871	205544.529028	287630.846354	145656.19416	110661.444683	141578.78822	98322.9437402	53836.911843	316317.172871	186275.656749	163573.217738	261016.200177	71632.1615657	139595.652468	125690.701995	179435.381812	189123.622246	122093.950861	203821.058208	206201.389633	219620.331352	184568.831112
ZDHHC2	36770.2632511	41199.0373966	202298.62753	55262.8442429	74181.5573905	11214.1686949	46427.2583914	56478.9683875	33596.1220476	13684.1884788	56390.9784668	51901.5811258	34632.4167033	85674.7203002	23203.3285639	32566.7001843	46434.1340744	59414.8953576	13001.9915104	5939.67908941	101479.00775	32628.9275218	34499.1983074	36624.001112	12814.0818062	88531.1718761	48707.1014168	74775.2007975	70428.9585404	12020.4618735	28635.3682378	92791.6286779	66415.8015796	59716.2260564	12816.4091049	260752.424457	10743.2239403	60621.2358825	41083.2203583	87532.6032121	1437.92849146	172606.249705	59104.5386717	84606.8981554	344835.225104	95416.1052701	155360.220462	25714.0842675	148943.950923
CNOT7	200787.252493	169589.833241	156874.337389	230452.587004	95113.1408115	206208.542848	100483.480129	159346.605459	172028.131968	186317.415092	170396.859525	200910.719721	100825.039641	184533.485273	125156.629652	127926.045725	139823.633117	89781.118002	74092.0843861	174685.234538	254990.536944	124370.628835	131132.360711	116638.568079	89892.7335063	282361.151728	146390.715704	142903.585265	172106.301151	121357.229524	153761.304114	168263.803217	100221.76714	143803.656297	173483.677264	302471.796141	99091.7302999	146328.654407	291921.724118	160338.172925	105756.335795	217008.292176	193657.856213	258205.424058	183136.742316	181715.828095	160865.853019	182718.827377	180214.473613
HR	11311.4959762	817033.542042	59909.0417587	13387.202435	159599.839675	32327.6690262	9101.25566266	39387.6033009	61565.363023	115163.791676	9715.79010207	14827.0042	13178.0085393	16533.8316848	84968.87748	36236.5045988	33253.7270427	18439.8418599	171254.580437	1234.30496117	20399.5315589	7991.77800824	33381.9030262	15060.1488225	753146.624457	57486.5350461	5884.45488263	21376.4598478	26026.3960771	1427.90976856	16828.350301	83484.1452974	52595.9815332	44332.9786695	10416.39643	31455.7748963	23197.152749	36790.5232587	10816.2450893	56909.2102637	10290.0939177	31142.9005225	78629.2736278	75447.8722693	91785.5658145	96272.6734958	90154.0545298	49492.0817295	35472.1251173
POLR3D	107254.776107	269659.18221	105658.494838	73057.8593926	88805.0630085	92118.6307487	74011.7042556	141717.492225	82389.6547855	74920.0098999	81747.3987347	129347.659494	107982.902459	73001.2012456	117365.959176	70175.2432812	108299.168232	69613.278598	136278.718685	97414.5677323	110056.076284	75462.203524	88983.3381119	64344.4925543	101751.289678	138655.907831	82110.9357912	80658.6759089	130085.879778	80812.6460072	75398.0424054	101998.440546	130927.447413	124746.818814	58150.7731091	125156.251456	82576.2781021	107159.947457	147493.531794	74988.5295781	61272.1293608	106544.893685	125873.378925	134513.622474	107057.430733	90297.7262574	104665.497506	141653.841639	100265.176325
EGR3	226826.365038	66005.5650872	10468.5309701	111899.730899	6471.5560868	163996.401987	73678.2799409	335120.421483	52100.9744362	23115.4902841	99852.9916897	146709.228096	71957.2745627	106759.466198	16222.9261813	28985.8791423	52915.1398444	34073.6373416	57331.0926968	109657.30264	69349.5825827	22231.8490383	51037.0919571	101398.927346	254093.298048	348583.547195	79220.4705696	172950.073062	884542.344902	19180.326778	77227.5698856	24660.4504439	792688.396105	72790.3548553	10904.6390794	28899.4457275	131389.797976	279756.075952	64287.5067766	376251.839141	119684.223151	618581.963766	251252.149697	87662.3983138	62232.4171441	318468.475074	300834.658753	70296.6003957	299054.49087
NKX3-1	58566.0162694	60544.5885945	6273.09569866	196214.312507	2299.8948576	241348.663037	28110.9406196	28998.8705186	13960.3923278	25109.0374326	90466.5615662	73856.8721383	58768.2103409	107411.35348	10988.4182549	53536.6682458	465548.067049	24353.4444619	5497.64569299	720759.252323	26319.1115257	41989.4196842	87372.6510846	8425.5800505	21966.9669943	56254.6844593	56116.5342578	144689.32053	49130.2441187	2091.56378206	31304.2814107	206361.869817	31642.2363066	200604.937502	2629051.04039	13383.8566609	42653.559261	40075.7710377	12229.9501989	44365.6624145	74807.0098807	62534.7220831	30310.5881696	18033.7357997	200347.854584	120348.823411	23215.1891254	201999.845045	30958.67404
EBF2	13880.3289096	15452.5925991	3523.92775382	17548.000089	3564.22625502	6260.25116128	12453.1536841	20400.3095031	5365.01184326	14528.9411635	7873.75445881	19785.9694472	5206.60400249	14254.7026272	3047.31802559	9570.6063175	14005.9427215	3789.58683073	1325.74960368	4807.38606795	24298.5120179	9409.73220373	15184.2975948	13873.4997499	4028.15787195	5408.5283839	18345.7863266	21021.9397617	51862.3073321	4457.67137585	15719.954825	3208.52727377	45859.111927	28157.4686784	31874.9545533	3650.77687581	5639.27510282	20388.2527904	4121.76136465	21207.2838397	456.146596484	67698.1317587	31797.067964	15503.5086378	5744.48377616	35439.2904509	176001.431423	9185.75923135	87322.4777368
ZNF395	242997.207893	203453.435063	175933.155383	341907.455485	405339.060706	126096.45545	110987.973489	182349.758994	154039.715795	286920.858651	206336.91979	297169.302933	153585.988657	174634.37236	108981.197413	137082.626598	365498.060721	56903.3428957	291031.200399	391085.530749	237654.832801	191257.961452	157804.152032	167307.021068	467015.503334	368453.644103	275996.495278	420732.541275	205169.761273	125671.229042	158967.395956	106068.170217	213666.794181	135490.237611	289360.114373	367844.342581	278964.866932	265246.325134	170436.496999	154099.980906	305672.856898	405845.104634	254617.462151	207711.168142	157947.948745	419483.384977	443778.508342	550725.626834	385757.98907
HMBOX1	67852.2350787	43958.5962511	46062.6575389	45115.2859838	34486.9415396	32119.4104276	27885.6163276	46481.7800147	34494.3171773	57932.773411	49557.2966234	75324.8064398	30548.5756543	38868.5731953	42024.956511	46287.5212599	67083.0307101	21934.3503294	26046.3134095	48297.2227998	87438.3053083	38479.3367635	83231.4982454	48709.9560216	56863.616589	75647.1097376	37055.8103449	61834.0412073	51887.2178183	36438.5259722	27678.6917043	38506.3173892	55270.4169129	40966.8112465	59419.3377502	56579.3830516	32377.9902443	62436.1144757	63065.5583753	29489.7072449	27055.3376787	106445.401413	53791.2413977	46726.5267115	44171.2321099	67441.1645081	100418.084115	94240.3454938	65298.8674039
GTF2E2	187384.47102	310297.906957	244394.63895	188178.461083	165585.18311	119671.877922	365589.193196	254013.097163	275028.644698	369048.266198	157544.364801	277599.672991	190618.661708	262908.697666	301708.991741	162554.293235	229647.034613	252947.731298	259113.800672	349662.62851	227752.840052	155789.221567	197579.159694	168068.649273	216699.519593	294125.198783	263805.273439	136368.316909	268490.966897	198170.765198	174005.628481	258727.259756	161930.865146	256201.418597	314449.980028	275180.531047	161044.48854	174875.004714	378491.57778	232243.44041	163335.654926	175473.963181	224660.094286	276756.515925	166938.709712	211176.045237	459273.447268	204518.788818	244146.640576
ASH2L	228811.675827	164325.602205	162648.070838	246825.997125	368547.723916	1821556.82638	269758.058001	204895.511994	361676.212106	285579.406882	178000.555538	246520.812325	223214.384182	161939.179367	278491.06076	128083.740758	195440.285719	199172.756869	847478.928785	239375.914602	317838.034186	430570.657532	159629.848315	163390.192013	225518.21532	249321.525942	191655.183195	200569.120991	194291.598796	133190.046311	868381.315928	141895.341925	246341.988589	236948.35822	234564.358048	1729054.74708	419553.084281	280108.161645	258698.690589	212003.074563	1548200.81875	204652.774552	225941.417336	270388.222692	202897.103186	243120.082512	304117.982759	306699.699831	228754.993261
IKBKB	171916.781691	152078.065465	73255.121621	164651.691502	140464.126537	131333.698447	394820.275631	105642.350398	136200.929143	154397.669982	224103.562656	208199.897605	224885.088227	108505.745193	109585.928349	750616.160756	327561.193414	146265.27947	315447.51281	237925.141597	235660.164564	352236.378522	101350.235795	305202.432175	149316.238893	139839.021196	242316.093473	313311.0945	101058.015655	90055.9486501	432695.813818	92890.2318071	222994.646383	65644.9480312	103300.082144	510452.031033	264794.069373	295575.704255	138292.883225	90572.0247184	694309.087618	203665.658146	257963.887014	218318.5385	148305.248444	153968.297335	94920.7433464	286400.334197	157397.984767
CEBPD	278557.982051	316999.25359	880226.63553	434958.448097	318586.807438	215426.222331	258820.375402	269872.061746	496828.916998	50087.6533934	130345.170304	871256.175884	283135.039054	213621.654687	81796.5272639	70896.7194316	621903.543095	224813.675304	1936703.01709	90806.0114953	150866.425884	181285.155052	101432.627609	422163.872184	1630534.12723	37751.5391563	217328.500157	840903.453938	632175.946753	106102.314043	630445.98088	443557.802726	1301368.62574	153673.70174	724473.122166	266906.487088	990525.871064	994970.602286	265753.118797	182997.81388	362536.895651	469925.345693	200840.392583	91272.1482227	306265.427598	896761.493078	807564.618753	247406.891296	700602.158216
MCM4	252986.978147	494398.570239	518718.699585	325910.490624	656656.896577	474127.057148	555498.689322	278664.671313	721129.120835	887059.134826	963678.479761	310265.25578	179054.066789	112339.546566	1311935.64645	357624.288583	214083.860401	492933.93907	936078.981693	222544.930024	558366.900406	458410.155188	155755.437745	415127.628397	256944.982528	607771.699876	108489.704035	138145.636827	407870.371214	372285.888828	1117839.93791	483770.728521	159232.880288	167256.575195	310581.37156	507236.18749	608704.020547	129999.82391	378605.284084	647611.471114	567480.670604	97573.5926713	111497.874085	316120.157125	196357.90403	188410.651482	45378.7652814	178097.557868	113580.455486
SNAI2	256627.030215	166177.274197	268094.08553	131315.136341	109565.143701	78027.6387949	436777.293798	395518.118872	187740.943579	155503.476849	238913.78663	285216.745875	101755.689312	114900.268758	202567.803717	267279.389545	310077.052109	135908.583791	143215.524289	37681.5709021	266575.024502	351639.671959	296566.516188	189762.329853	161885.63567	142881.743366	60104.7927954	480408.733523	364608.819035	49634.0570912	209511.85509	209636.233644	256538.824819	849448.06857	530065.787922	84442.413144	93841.6555715	721643.768074	107373.147893	203447.61822	3253.61251781	331666.833945	217722.904808	135838.640755	140951.869782	435997.885632	164869.737781	138207.064896	598885.121678
TCEA1	408677.99611	195770.902447	512524.083878	460774.812912	642676.744104	502850.57564	710991.694223	280023.227868	822032.192113	403290.001135	1179651.99164	355698.617077	165771.977597	373333.778297	801907.352226	358051.844708	280647.97896	329513.38088	558929.888754	377953.622094	355850.847958	759297.028454	425992.812209	753335.84223	159548.167416	606635.592547	388925.918418	291553.596904	369765.245113	478155.752225	2720150.86896	319909.353532	196080.833413	356925.406952	547935.493144	668730.458374	442915.284065	293043.649614	312319.028336	402378.56871	490581.675444	355999.919562	242368.623056	423235.700405	276419.315881	298141.885619	422237.165225	480113.126728	337850.382101
SOX17	48210.6303154	73874.5285272	13613.9322017	43328.1357819	10959.2468125	21619.5181009	20621.1269854	71118.4822931	27165.8285424	22219.3072395	16654.9070083	28381.6583893	26419.8890706	79465.0664234	15480.6425908	19180.2568027	98638.0946713	18820.921427	18361.3772769	27776.6048991	14123.7257079	23221.1860624	21965.5292509	39274.8682545	66696.94152	7384.77868787	40665.284047	87987.3791561	267612.98514	10711.1523545	55391.8227698	16746.6890308	118779.407749	38551.3568325	59707.9397186	7354.5539283	36990.6307027	57916.1009482	27579.0185588	51990.0565588	3859.44427724	151551.859356	37894.3669944	20527.542736	34717.089397	84926.3729535	169067.723098	27106.747238	460107.692917
PLAG1	1537.55371648	9724.21163385	55495.1352439	2011.02492973	3785.17777207	1131.20892298	2786.68501002	8333.11782167	4323.18648713	1880.9577837	4492.93961217	3144.51134967	2130.15393657	9992.26057784	15601.5057807	2822.56376289	2685.78147674	2372.95552085	1397.42775473	620.486060858	10291.5054948	7757.66829571	2225.65459512	1979.13196657	4536.76291671	1592.64539522	5247.93069157	6761.26662127	2117.82282255	1552.74808996	6683.64583002	1778.84411796	4251.67928045	9372.57917486	2424.36785022	549.737179244	1532.64284873	2498.6778798	2659.96472594	25572.1424387	824.243447803	18819.7734813	1516.9997121	1882.68702288	4442.68826776	2462.99048916	7680.0448011	3760.57410221	3535.89113897
TOX	12208.3802878	27526.157093	95827.7832598	33432.0710088	642.740491197	5004.86697779	27740.8725099	38684.8399794	14655.9836966	15025.167155	9087.24498852	19194.2479331	39212.8673237	75155.7804861	59846.5575121	45364.6328912	12731.6184382	79833.6682876	1514.13377637	271.508145618	10022.263743	11821.50283	14182.5630714	20514.9412882	8791.45124952	11118.7088955	6502.54825999	31934.4081243	23592.3078535	21621.7986742	11089.0518187	29232.2952777	13910.6019752	15564.1456393	3761.1553517	19284.1175291	3063.2100462	14323.7951182	79791.2535723	24527.0550293	1875.46809779	22213.3967379	18067.7681533	5211.99411216	38104.8587848	22572.6430463	11459.0360945	14875.9414104	30589.6631609
CHD7	36723.3352572	61865.4149455	69188.9329197	19738.2835194	90423.2772239	35306.6811372	84705.690304	51709.7543417	82724.2366121	59587.3410497	110647.944224	76653.4700373	62616.4610652	46115.2161662	149611.911781	67844.3029663	24657.3823959	44688.2216296	69705.4113038	31107.859524	72198.0866798	72218.5310529	41130.9198863	42398.2387244	15705.9671856	132297.053165	21977.3509139	41761.6273528	64716.466476	17144.2734478	95137.72875	21120.2095319	33973.1772057	28274.8886284	37850.9722507	18933.0753505	66662.1779399	38301.2841732	62327.3812197	67831.1682051	10531.1200252	57414.8245543	16749.5668182	13616.4368873	57569.2179115	49040.0086947	35947.0998066	29936.3966711	34759.4240756
MYBL1	16169.2642252	53287.1080823	91359.6760783	33804.5384895	38267.9644214	92676.6232835	99242.638829	15590.7910394	49968.7748316	30442.9031011	256044.802006	22932.1597847	11044.5274169	29433.1589554	682391.815046	22930.519967	14586.7113132	79891.2071033	23869.4906974	2117.49349042	55377.2941292	24914.3750425	17766.0137815	81758.8829414	14673.1428633	91336.5303469	9782.85271696	16028.8354093	17258.6268249	57755.4883597	134910.122645	14400.4163004	19890.6265862	6425.14544923	13434.4790619	123281.865881	42984.0562768	9808.80192841	162274.581919	183004.314306	78173.0350767	17528.1082692	8720.35151019	14708.381184	11860.8425302	10850.7336904	6334.85124543	23573.0069707	10222.6754275
COPS5	156999.899801	133517.025904	182737.330336	189783.47742	287850.077213	324849.494718	232689.998451	142853.068427	376749.416325	158855.466913	374522.441709	169420.867231	138572.123746	192568.313644	236330.151937	153656.950842	188633.681698	167123.422901	171770.170507	207815.87379	193573.086301	258065.519465	242480.1665	335909.417564	151103.854445	212672.643442	152095.408555	141610.596483	165137.346891	186352.862908	546716.952453	166116.513519	129694.977874	169760.307941	319870.814801	265474.949388	328010.011146	145519.755667	194346.850283	248900.851344	181015.39991	130872.335658	111414.246331	161025.531305	132115.417325	125953.040242	159357.882815	233468.354559	136075.431296
NCOA2	183001.801639	135827.479674	166656.898047	162413.150299	281026.163483	143129.971778	256032.814001	128347.967311	180341.783502	176750.4801	504502.502746	188594.428842	54537.9614462	116405.683087	187978.204629	154887.693821	117828.570366	124159.394814	48115.7122833	70962.3340843	322338.262249	307386.145633	232975.287402	328385.711404	45843.9026022	260140.193478	151539.249884	145217.043295	183969.57956	611939.932989	1088690.91263	183138.85639	131891.186254	116432.34203	143491.115303	200179.273729	102750.370128	147863.166146	178014.088051	256082.85237	145147.594062	270185.472261	150518.418173	228899.037403	168388.922682	150183.70702	155365.281039	259406.801838	178136.865787
MSC	81222.0209286	129258.381325	72309.4344801	79924.2470705	34765.4772737	54914.2239821	159733.579369	247739.076578	119954.242556	58897.9700229	65650.6613801	121518.833723	102162.139953	185003.339166	96146.116063	71748.9563807	101860.919541	92113.6861334	121367.890127	9377.63179145	60958.889553	156790.609162	48827.4183402	171190.700204	153025.44755	46829.6023737	37752.9956328	97751.0201766	210747.018445	45509.3021553	39533.2831759	72781.1680926	95648.8171011	201130.43071	158230.185839	29209.958507	62190.3343629	75825.1205609	163094.761557	49056.8865384	2138.85908597	31137.1169769	90504.751148	30150.2213843	753584.751176	73695.6361531	66275.1763993	44225.485561	66153.0791468
HNF4G	17463.4297769	10528.1890564	47490.159832	18370.0526676	184.155983433	1843.68695249	21573.760403	3278.32438819	7152.85130802	782.720658738	8238.10767371	280.824282454	1735.90259937	1900.00568645	12226.2133005	584.167725653	22139.4811726	21437.1794506	3904.42361434	0	25707.1869364	981.477555571	45313.4639146	1792.03549893	162.509609904	9144.13169154	508.115364545	4107.36779635	3020.24404866	9964.73905907	5366.53149816	4187.77263809	3328.90012155	1612.97086652	5867.12061417	2389.28635041	10464.4232564	2935.94469514	20202.5483217	17497.6549041	57362.4561314	8285.8748273	12671.3745459	9144.05339194	49535.6087434	8315.2834336	1539.00326761	16802.2577162	7924.02695088
HEY1	58108.2289637	50669.8520777	43660.1548246	48285.348729	226603.310846	114754.355182	126210.608783	84166.3748368	76359.2906238	42579.6890034	43737.4186865	101056.077771	46570.8776492	93639.1062739	80071.2982691	53205.4433729	88625.2274464	39353.5436921	48140.5646429	34587.298341	238103.62964	55545.4060944	73836.5134027	60117.113253	26702.6116846	25352.5139869	34882.1512188	88933.7248602	76990.5917497	16816.818512	55383.9909061	27304.0463639	53036.6888619	192161.829042	608930.120461	104476.896061	37345.558047	111397.405102	105466.844215	120790.0555	10487.4905213	153210.658686	65144.1397389	39696.677233	33811.0077371	105598.812063	118392.016716	66783.9130282	133898.492089
ZBTB10	56329.3898094	66411.006482	258206.188828	77849.5424735	7363.89592719	120725.659097	96870.7567297	63956.1673637	132339.014486	140016.398151	261124.144033	107273.776351	21096.416134	55630.6424986	293611.117536	62176.894846	40156.1925403	52841.6267049	118396.505688	26276.0671944	192812.254214	102367.116673	82359.3629951	91891.6370652	19494.9493173	100633.240075	76571.5331103	55187.3466678	130564.970306	674224.288623	269041.932634	54404.7818823	68074.9248603	75567.9154254	62975.7896956	160347.387258	52214.1598704	76232.3079561	90879.9965541	157857.523281	184790.701463	161657.83218	42781.8169499	214854.786227	93086.4940984	83812.0753417	127183.796466	36837.6237317	101369.861389
E2F5	25078.2568593	59197.860727	61613.2708062	36831.1424365	141835.521855	77085.3618955	85611.2366129	33304.2599077	127232.277323	30935.4891932	127739.586181	41607.116126	39171.1341111	60735.3466074	77188.1740125	34217.7132196	31666.8775517	40716.9625522	88368.2110792	29578.8613438	36435.7688391	56167.9105987	39677.8103943	58927.7862644	16798.27954	72077.4805654	44558.5803211	25421.410643	38565.429005	115602.355595	94094.1962778	44572.194855	20213.723499	18615.2356935	27083.7446859	85533.4435764	58291.9761341	39773.2891804	108395.231791	72801.0033338	49282.646159	30792.4628062	26121.1026939	45773.6857429	21396.6903599	30375.2207628	9815.35160919	41208.9135994	24382.8973394
WWP1	520292.78483	115236.972555	232227.172682	445197.464155	291036.820244	1385625.77249	1403961.16692	270490.2725	1658128.22945	197953.27887	2375605.53108	634668.064023	125911.50051	755256.115893	312499.50671	366392.0305	434901.763667	439790.228359	273330.450715	473411.090058	1165647.43824	764135.878765	656437.553587	1771711.16905	379786.343371	1915418.71794	517615.100948	482907.432534	424802.718737	3190578.82128	7808938.19341	124291.55443	276363.751794	249085.128531	374737.157214	1389998.93979	503954.617558	327366.17426	215458.049607	1420327.81277	796287.057485	584624.378837	357736.293496	531882.011384	302079.663207	328996.209221	428346.582193	451441.792224	464725.148269
RUNX1T1	19075.4284429	10049.3099541	3335.23836473	14020.0197356	2779.07502003	3803.23555589	14030.6244585	28626.5095733	5231.29230168	5836.48800914	9772.27643636	20740.7042709	6266.56349523	18665.3975696	13393.3006825	15790.2996352	19967.0386935	6748.69602049	5834.35121581	1270.62201402	14517.5523601	13817.0985159	15730.918106	11020.9746264	11079.1331776	8839.9280698	13501.5280933	23086.0663851	26504.255331	2555.41996853	10921.3320314	8006.87943455	26125.1412963	55487.6979529	10586.5338333	7211.28457336	6041.01127488	38437.7460684	5387.82881005	11973.0790172	333.905374854	49541.3134077	17585.852086	6341.19312599	9154.9695761	20600.2268061	51368.0289759	10393.8343924	39742.9322906
RAD54B	13257.3238061	12461.772098	11722.3383934	6165.95342636	22421.9735956	50811.5572132	16002.7308802	11270.478655	21812.5091089	28992.6495746	28345.4944792	15924.9734687	5911.19565528	6941.58394911	33191.0268059	7733.68430863	8845.39807898	23176.0302897	43685.439331	3762.67040741	16534.8346203	14588.4525321	11654.0076868	11716.4978736	4336.7478616	22385.011272	3601.77351328	6015.16272143	9085.32623562	60148.5788612	35001.3917896	8327.92074452	9801.3508386	6488.23544445	17873.8090607	30136.9107714	21225.6058953	7345.21093432	18800.0380412	23357.3426296	40666.9531558	7811.2228302	10438.3064196	8035.02595761	4232.55717687	5738.85758953	4278.12464812	9253.26422114	5106.31181629
POLR2K	421457.649555	584135.552518	810698.078111	521346.042686	588139.104209	1368410.40968	839603.783559	516987.677615	2275140.57322	1155166.00129	1514377.0042	568332.379786	489220.1667	973347.991158	1337329.06287	421495.706743	412374.619879	824225.366277	1772096.0222	1020649.58086	518390.441848	1028631.73654	743470.331091	1130349.54811	409225.886927	695975.290889	598963.778391	428843.13374	604753.373636	2895388.59274	2870577.48633	450913.707256	311428.673793	601243.582804	1715944.14639	1337841.25084	837425.961949	363920.089746	541406.484177	1211656.356	790906.05203	393056.92907	551248.41489	581264.510604	378642.635531	439749.605823	474364.161816	554770.776373	546071.70144
KLF10	567226.067089	589057.662683	563226.857735	400011.375295	140949.7142	376194.647263	594506.371245	454883.917448	503470.524351	272914.43643	568310.478044	554961.256915	191739.396982	370740.533577	497985.62939	300529.121495	449950.794212	390572.710403	463100.680744	178107.376566	366483.078545	649346.508432	454289.177372	468772.527055	524843.114711	455144.890269	357078.548435	229846.873391	1561037.61992	380273.517781	1554603.46324	628995.418963	781472.503083	736223.937838	198240.041017	253420.771418	313197.937368	384213.433007	309175.348408	478872.906055	358539.907917	938017.733299	471054.061849	485699.727564	939371.900053	902515.580012	1741543.94066	192466.112579	821735.748389
ZFPM2	44437.6136808	23932.0665199	35770.4670842	33924.1694689	7456.07903444	7380.57443662	37935.980839	22745.8359612	8842.85617655	9999.09282424	28252.6300006	49342.1989446	6393.42416206	26732.9490938	9446.81368522	20672.6627168	22999.4435514	9221.10677188	10860.5748563	1105.97228037	26089.743364	55029.9595662	34552.821247	31060.4673858	5424.45582004	23484.4292582	14604.9020647	33315.4268075	48273.1835464	17158.7588498	20844.1574316	3916.10085785	45059.6460267	90964.6742119	41595.7175654	10384.4646102	9681.7742686	26285.478444	7396.26883695	21594.2722601	332.156857962	51949.5805938	30136.485804	20788.1772932	16773.9044478	29658.2068896	107878.764817	10973.9548206	57608.5561229
TRPS1	1295112.04997	373261.650324	1910140.94813	886387.783505	706715.984107	963848.442721	1109715.2016	313353.809267	556226.774068	404788.491855	2119262.72289	1256146.64674	132615.934709	244081.255376	1380386.38624	448118.876955	453791.134619	294000.894833	1068844.42777	996527.685857	582545.631818	1628454.13413	1013734.1057	1243681.86835	114557.298118	1991373.11508	837637.127377	729196.526226	223523.973906	1740585.24089	2437740.69712	619023.239962	447350.528894	236358.658264	776596.372793	4305443.12967	1449892.72036	545401.835398	590514.907923	492182.881582	3470931.26048	604077.875269	633499.878726	992604.719238	241924.833402	490629.173625	98423.3733511	1160830.66431	638313.07429
ZHX2	330475.965196	125980.502095	600035.785267	355614.218696	319133.533221	435093.030996	515617.207451	173930.71135	462493.325343	252591.724032	486866.573622	313370.959312	257615.068248	311093.29747	864943.77766	260153.076571	286013.976595	233271.037636	262443.955035	232992.849839	298951.995816	297767.818059	282281.063704	489576.984885	185815.472815	233086.191029	199271.403682	291573.406055	263268.860493	233804.617677	147008.539474	91044.0952159	257409.185548	242695.259456	171807.279577	114135.160226	270387.194462	298714.840925	465838.742568	280042.481262	170511.457021	284840.844719	516449.047841	257167.19082	225922.916839	316166.819198	176180.629792	348596.63202	280339.60459
ZHX1	309533.273068	95480.5496516	567018.443588	153956.976199	224119.061183	152164.12945	246460.694498	168045.902337	104884.920007	206196.210063	193777.499511	152112.46562	106692.5369	139847.376392	238317.907697	125986.026119	144159.787381	98437.7352372	91744.832452	90568.8099792	257533.756014	210129.311232	311149.149402	208151.933433	74093.316709	153939.934909	205462.45142	129347.37713	179030.251268	284061.900234	662538.592109	125474.90654	126513.624172	173780.54122	152635.618251	249927.048051	139152.537462	156313.544579	161033.933049	191369.406531	100278.074116	295774.584322	429448.559075	120146.868828	195398.347212	204427.114477	452425.865798	208241.841406	239908.595916
MYC	815685.951879	852454.332415	2123723.20793	877443.575224	2543533.90851	483242.575963	480421.942118	902485.880912	538558.294832	86491.5456603	893413.855572	761731.187313	262708.988954	431352.39299	1895706.06745	109807.229841	399718.417586	269249.956157	1241702.33586	74499.2657369	380012.066077	588316.658043	113899.348974	136147.308403	4305896.53753	382161.621393	427886.132651	1023411.06969	1735554.19318	1631661.86464	589929.427496	489236.138592	1556252.12514	263630.013586	56567.7263576	405594.295637	1991116.52378	1031366.11874	1133906.85238	679141.943074	492881.73412	1288629.73617	263929.847372	191451.69179	613178.80895	2063926.93784	992272.792698	745138.449702	1428497.11137
JRK	42935.496907	67639.2571659	40792.0405817	24435.3104558	118700.757548	42197.8504272	55522.772416	35364.3342528	25953.4689941	57397.2844049	77648.181535	28185.1395579	60768.3012481	25209.2125034	70893.3907445	52411.1053976	63411.3564137	16884.0571793	49784.5304633	18678.3531895	43581.4128201	37979.3915963	42376.9029234	54732.3549112	28065.0145363	34137.377138	19065.1183616	50037.2320741	29084.8775672	14893.293445	28385.1962665	21876.0106094	65248.4534405	28872.8654638	13221.8226336	40840.5669351	40279.9624986	62910.1293537	39707.8795212	55205.2064048	39126.4709197	54142.3441877	28009.5399104	28498.6906822	16914.6086906	59601.891274	50236.224428	36544.7136104	31409.683858
ZFP41	27727.747480987	42729.750377362	14540.099357045	16363.392548258	29631.533209618	40291.89588476	25733.0208527105	14387.6767929635	35498.3957147435	20191.4375669395	39843.623379418	18271.5586148795	27078.236135242	19079.1903573525	34360.274648901	14198.943635906	18843.8057040555	11266.6463147909	46730.6110395	14893.5542857705	14509.5877697824	28199.510280103	13747.3731835585	43780.8140809395	24490.1733794275	26021.8202211656	12085.8866894135	18651.846949449	16158.6708840955	10994.659912933	28756.74486041	26825.7333714695	19067.6849266855	7066.151090144	16364.29161665	28597.8374794575	33510.2790155235	19424.279134506	12344.0627964755	26663.8242157	61388.13951179	11681.5253154625	14416.453666471	9684.2149649705	8546.2380558265	13200.619231559	14332.506367845	31366.8263431745	9849.544040578
GLI4	63035.175721	159643.594341	68154.9803981	56921.3637053	163866.656693	141613.147663	67744.2373887	42283.4315214	161628.897031	116798.590624	91906.7761173	60374.0514645	108935.128136	49073.0474715	137513.308502	41442.2285863	104683.08239	44212.1900217	270594.948263	68731.7941386	32174.3750808	86862.3784063	45996.5990563	179519.116969	219334.866697	55555.3546041	100385.445495	106781.928151	37985.7190654	56322.4988987	123782.920645	53007.3952491	135642.796125	17750.5940109	89415.1014671	102593.060137	232442.769724	103629.581421	78925.4605255	139166.671025	141924.529889	51377.6865979	56847.8521898	45538.9288617	28618.5108092	50036.8965764	96135.296558	129584.616512	56200.7493598
ZNF623	231317.113959	115574.827163	171314.409364	116882.356908	274086.72566	292217.415898	225505.143358	120725.016041	230837.374603	280885.81463	428833.968674	166061.053761	85128.0950417	124193.642655	274147.229571	144137.316552	132705.845293	138712.200832	255915.54415	91243.1505182	197783.730909	276731.734152	190770.590806	259894.259049	80113.1442417	320307.037685	92324.0497828	99445.8923389	120133.766337	150682.464444	436662.838999	126379.691607	109017.414755	122135.043071	111531.993395	283115.762786	152606.441744	142358.845949	134879.70908	349687.731675	184310.800593	151914.359759	83297.9200255	147264.50608	102584.34496	108183.910333	103849.769612	140435.92277	99560.2181713
ZNF707	49670.3347168	126407.835016	65810.632002	48693.9815296	78685.4246424	151850.71814	67317.9821597	34964.7328832	82310.7139437	69909.8702728	77502.5336943	46235.9404844	75489.5395686	47833.3477916	118607.516145	33335.5769674	64327.3415068	64966.9990308	104173.965332	45558.9123492	40854.8284262	79903.4913177	36227.0183723	131440.680104	84805.0504555	46918.4209652	38982.4951228	53343.7677091	31872.750216	37545.797613	98990.2372171	51059.7581264	57900.6546296	25873.6668845	23010.9945486	72766.387045	147078.325978	63163.5636307	60659.076675	100330.466358	70665.1968816	28029.6438699	38207.3397884	27363.8069647	35365.580703	38769.0352151	22367.4312743	71440.8241606	28727.5437176
MAF1	1120859.49767	1350217.42186	1790101.23422	970006.584224	1452314.59264	1399665.21641	1219508.69548	1039841.89317	2164578.32059	1593774.1918	1472305.45384	896543.513181	1006868.23798	1295160.07552	1770101.98862	677221.749079	1078063.48039	1214618.49719	3389598.58666	1409431.90858	576352.144341	1167776.46676	613673.742711	2253096.78522	1949924.36835	1092360.52573	1057310.6913	942064.549347	1035061.90416	1113867.26367	1733320.96596	988920.669077	976352.603946	889931.458588	803024.864175	941712.161179	1500700.11742	1074245.69665	981556.45946	2407184.48015	1086597.55389	826412.656288	648934.639597	617181.430185	938199.414443	1037928.74951	1445683.85887	885624.529812	1033744.57815
HSF1	474302.727829	492092.382964	594304.435763	350733.486677	693183.629684	442453.602002	447502.860517	295308.568371	865580.88618	595298.219126	372467.402989	309817.365588	455167.350556	345110.877009	547122.420232	233033.388811	382006.517248	396024.009012	1402841.30612	317297.096511	145171.879253	440176.283831	248422.211994	571571.596475	712293.675592	326854.843807	264968.231804	298023.005199	348435.016869	315554.630234	622794.033124	358919.630519	358803.672145	260176.550583	260023.616282	437614.205382	664152.87585	374802.338938	400456.261019	817930.054573	367401.973967	227673.109513	219427.276616	178676.789721	300226.167009	295325.879384	362087.362566	446433.569967	243085.988447
FOXH1	1654.01818909	2391.03717541	2774.66740015	1609.93729404	4596.76289769	9608.72269732	1853.16501508	642.316037475	614.962404273	1127.17403692	1640.380689	1348.02387283	1944.30800533	5211.70442843	1373.56659741	280.414511535	2424.52053389	530.430928451	4373.17283373	896.204674029	787.663784838	1551.96671874	1712.72038572	2615.06879024	1248.13613296	9175.26696912	1951.26044107	3270.02878202	0	2125.91716242	4921.43524585	618.532693035	1304.45049485	364.359849804	0	3297.37982672	7777.81781914	727.392945489	499.452745465	2566.45088162	1805.59698308	691.724963435	741.776040308	2003.20005317	259.871908487	367.0377357	394.00451214	4058.10640233	864.482473893
ZNF251	197974.186086	133180.845488	150394.516359	102208.57109	135562.480472	175388.687131	137779.131875	64972.7316346	79679.114442	196186.579721	272731.236326	104386.121394	63765.6879824	71488.5314281	93087.5354113	57412.1318158	163991.185023	59837.8281954	327529.875426	106581.157492	74734.321704	144830.191376	85061.7603352	217065.562711	87368.7395875	99024.9458477	92376.4843587	119415.462772	66230.5109374	114663.816848	257983.312104	83694.2735955	148675.319595	97311.2279892	81791.9926513	242520.969881	187294.729641	94922.2757053	113563.830646	118416.72581	224316.844667	139119.96954	92551.3319685	50878.7953334	44448.2776054	99886.5069791	82864.9963479	108895.822071	114783.458924
ZNF250	64662.8382924	41413.4836091	71057.2959843	41279.1646292	78255.7297096	81956.4478045	74211.6954443	42263.4872753	60256.1177918	81427.1525253	103206.905439	54071.8815496	37894.0907178	59990.800721	60963.3790009	40784.6460261	46907.6560787	46667.8134509	104574.018691	43957.4160372	42310.9269532	83501.0772167	44673.8253299	91217.5834723	30945.7218276	67210.9857281	38061.2042974	32328.8083254	40657.7021014	32805.912421	127356.895606	50224.37265	34882.7119294	42147.2773386	32147.9858612	73699.6963448	51468.0205417	44854.6212231	48994.7280115	71281.4789613	64940.3453271	54363.2638009	24631.037904	38045.3608543	27010.3768806	51822.5652807	23391.4271827	48875.0016999	41117.1929557
DMRT3	4414.83074091	18234.4244965	3967.50914188	16728.2767308	2780.85564425	3181.79166689	4343.67375352	8217.07076245	3869.08478734	9192.95084529	2334.41811081	3533.83300554	2330.05108018	21495.5697494	1964.06893018	4263.60455568	11186.313173	3670.97312603	3275.49572171	3445.77618908	7249.93128625	7439.48329069	2394.60361707	6350.24708415	3599.17596866	2138.03409428	3410.14165899	9480.01320747	34748.4419124	2706.92145485	8224.70639713	3675.35045683	26399.3565396	21395.7232624	19768.5190794	2104.63896629	7340.21374159	4385.76502711	2793.19697673	7461.88482991	270.477541962	13056.1275671	18512.2066224	4077.53570052	4905.01422914	24247.0940531	70648.9540236	6170.20882753	24656.619185
SMARCA2	529867.011888	263898.148363	610564.09245	605624.942366	755619.896293	382160.418975	692865.530946	503034.829068	332249.056665	348737.97986	533153.068927	577062.431093	377943.920151	512146.280245	282349.423783	786867.102442	555526.240452	374638.619766	170597.614328	604525.217291	624806.097393	402110.83328	463536.987727	527174.230145	418231.192902	293687.936929	683794.343339	642327.589725	503254.936889	772740.643879	680809.699801	380413.776449	494368.847427	505901.39731	276980.70802	508213.74184	358856.542804	528444.432873	801829.446253	425410.981167	446378.985748	810651.451411	454505.555025	560978.800071	696722.246165	770095.988163	877243.063004	627927.220645	805094.517855
RFX3	24868.5530172	26937.9990532	70207.9675741	29224.0591643	67236.8186442	31922.2924513	30194.6639726	21764.4208721	13781.4566917	19843.324742	44218.6274763	38517.166138	31652.2465707	21373.5876241	18021.4388241	18255.4767884	20031.1691149	16570.5976166	12810.5051182	12519.1290157	17259.4757219	24768.293484	10695.917596	34730.7743091	6153.62738809	21602.7882879	20187.8615344	42029.4617474	24553.2594777	29708.3891897	37808.9819062	15386.2291793	27157.5053972	16575.747061	41115.0954885	26056.0484719	21845.9489912	39570.804701	31414.6192389	14064.9797227	18150.9343985	46682.3353667	15260.2637991	122212.410636	28070.6799629	33271.7620663	26533.3588336	61568.5119532	26851.3411242
GLIS3	31976.9651229	19205.780714	10761.2478016	13945.9181415	91392.2425062	4818.84430971	32483.4212975	21310.1099502	8789.6313602	9113.095138	32149.2900367	32929.4777138	3939.91165545	13731.8656841	10762.6264605	17975.0602719	17641.816622	29682.4337978	13732.2848452	938.063227111	22307.6073111	33705.4116295	26111.8285545	16929.9631122	3209.76867079	9959.50797676	3380.51904067	27909.7287733	34446.5952635	2170.40308134	22481.4194815	12859.1437744	28559.9154186	87545.9339983	21906.9889493	8568.96526003	8870.98322722	22407.815468	55919.4778267	14324.2368829	279.300005478	11876.9943988	7678.5436495	23196.2320337	36636.8801609	15102.2785921	8148.59487507	12039.8799492	17148.6456398
NFIB	144403.050176	184012.901188	1115814.22334	323860.921124	536806.844847	123805.189625	249313.524928	268635.84735	70369.6593357	194366.907715	179441.561848	231155.310423	102095.640306	173245.419175	208237.073851	156009.869677	318839.715877	64224.1066232	165533.783988	12410.0707689	162137.126506	147153.301438	59774.1369406	298661.379383	132819.657517	114877.815039	81252.982147	229787.387594	456721.507762	20244.1341356	197966.198452	425699.978406	244800.333622	292793.548844	592095.427524	195905.175683	240370.461214	274467.690694	339463.742012	283966.082202	17961.4555454	706947.583781	131453.466356	38403.581357	964212.932774	814147.315795	551908.059846	144913.072927	672189.685994
[truncated: 806 more rows]
[truncated: 1,166 more columns]
