# Supplementary material for: Identification of Potential Prognostic Biomarkers for Breast Cancer Based on lncRNA-TF-Associated ceRNA Network and Functional Module
Source: Biomed Res Int. 2020 Jul 28;2020:5257896. doi: 10.1155/2020/5257896 (PMC7411464; doi:10.1155/2020/5257896)
Supplement: Supplementary 2 — Supplementary Table S2: raw data for processed lnc expression from TCGA. [file 5257896.f2.csv]

Tags	TCGA.BH.A18M.01	TCGA.AC.A8OQ.01	TCGA.BH.A0BG.01	TCGA.A2.A0SY.01	TCGA.A7.A13E.01	TCGA.E2.A15O.01	TCGA.BH.A18I.01	TCGA.AR.A1AO.01	TCGA.BH.A0HB.01	TCGA.A8.A08L.01	TCGA.D8.A1XS.01	TCGA.D8.A27T.01	TCGA.A2.A3XZ.01	TCGA.E2.A1B5.01	TCGA.A8.A08R.01	TCGA.AR.A0TX.01	TCGA.LD.A74U.01	TCGA.E9.A22D.01	TCGA.E2.A9RU.01	TCGA.D8.A1JS.01	TCGA.A2.A25C.01	TCGA.E2.A1IN.01	TCGA.D8.A1XU.01	TCGA.AN.A0XS.01	TCGA.A2.A3XW.01	TCGA.AR.A24R.01	TCGA.E9.A3Q9.01	TCGA.BH.A8G0.01	TCGA.EW.A1P1.01	TCGA.AR.A0TV.01	TCGA.BH.A0B1.01	TCGA.E9.A1ND.01	TCGA.LL.A440.01	TCGA.BH.A208.01	TCGA.AO.A03N.01	TCGA.AC.A2BM.01	TCGA.JL.A3YX.01	TCGA.HN.A2OB.01	TCGA.C8.A12V.01	TCGA.EW.A2FV.01	TCGA.B6.A0RL.01	TCGA.BH.A1ET.11	TCGA.AC.A6IX.01	TCGA.D8.A1X7.01	TCGA.AO.A03U.01	TCGA.BH.A0BC.11	TCGA.BH.A0B8.11	TCGA.A2.A4S2.01	TCGA.BH.A0AY.11
RP11-34P13	11927.0383309	47893.4543058	54466.1703946	2579.81629128	28047.4750261	72799.6672015	37469.016006	24908.2921969	45165.8127317	37529.2507395	1032.66420135	46334.5233781	166463.279547	15310.9110145	15407.3369739	27185.3969933	151002.098359	27114.3590166	35789.404134	96099.5433297	2313.99348996	64482.3435619	55347.8056105	8491.21947255	81127.2005753	69883.4344314	74521.2012818	105108.261509	74839.9155952	29443.0971997	39308.1228203	423389.258269	227633.041741	28901.1772413	79023.9929	26534.0134464	159947.354471	96161.8596421	142327.032305	60660.334002	1136.67234624	130637.896138	137288.640869	11423.8001375	145437.22208	127776.304127	19098.81379	114450.031831	27428.4460414
FAM138A	0	0	0	0	0	0	0	0	0	0	0	0	0	0	0	0	0	0	0	0	0	227.620572894	0	0	0	0	0	0	0	0	0	0	0	0	0	0	0	0	0	0	0	0	0	0	0	0	0	0	0
RP4-669L17	2277.66387713	1816.59312492	2042.17984121	764.469769119	1754.59301661	3345.94225256	1195.71728233	2415.60156531	642.425249539	3597.95060733	428.409105236	3168.5031076	1595.89292603	1270.37108084	782.676550306	805.577289868	3968.04424217	609.53066582	0	2028.49220146	731.412522148	1505.46878908	2206.68819758	790.799237785	651.93755025	1834.1693201	1358.93291152	2310.86476176	2812.70581434	2062.22330515	2008.28731812	7753.85975292	2929.814322	1998.3145644	1080.7827461	1422.78337464	1151.06401649	2279.63006163	2869.66453274	1523.3311572	8151.21212566	4026.00260885	1704.78461751	1230.97558015	1493.12463614	2300.57291934	1337.69958478	1483.76632461	2528.64731637
RP5-857K21	0	586.914391493	0	0	238.687609595	455.168207411	0	0	0	169.082860747	0	181.990493727	187.494334156	0	0	189.287357706	218.215566211	143.222072698	0	0	118.154288233	149.659912814	154.150993364	371.629885992	0	0	0	0	279.613440011	205.007345413	0	0	0	0	0	0	175.007892856	491.009855059	224.762715192	0	174.11809403	533.637720289	0	0	175.42054664	0	0	0	0
RP11-206L10	2524.10365498	6903.18558347	5607.5375719	1925.62687829	5695.01627722	2676.80487393	6627.16579116	2447.85628985	1023.00524904	2670.57138295	4199.53852122	2507.49055467	6489.8120426	2285.67451723	3455.76925523	2099.14430291	3593.25925829	1106.99213776	2409.21408177	1626.39137147	2302.94850865	2967.31905439	3367.18075228	3933.9418111	920.180841725	822.264496896	5827.99205239	2181.72761235	2161.18838299	3858.01751499	1535.04935454	2899.75271891	4320.24451637	2066.3238718	3233.4891849	4748.12196735	3293.46011743	3300.09886271	9441.50067895	1270.22127771	2808.6129099	4214.25808143	2759.58972574	2138.42123621	1886.41475278	1165.64585231	2055.68658323	3774.28904592	2117.9115486
FAM87B	1159.82841498	2794.39979925	972.824275468	1693.37710337	5000.30314338	1733.70694718	1681.67208656	1321.18503692	1054.10094018	3381.13615835	1656.93013098	1906.27330717	1428.30814802	2903.33248411	3050.03999967	2343.19665918	1870.13093878	545.523826981	2811.0045205	192.021939659	1125.10554896	1282.60159487	1027.5149419	2123.27213753	2406.84494669	1164.98028489	2717.51684181	1978.27899125	2928.83230385	976.075034402	1581.70935033	530.110368316	3018.52658423	2576.25057644	2068.92520887	2580.26359143	1166.53951386	2571.56008836	1498.18722022	2699.46486483	663.204820405	3557.03663786	2860.80959767	2272.27849772	1503.37300526	4482.59208955	14182.5435176	2869.33342515	2667.2414572
FAM41C	0	0	0	0	0	0	138.432925441	978.823160914	0	477.137935806	0	0	352.729066996	0	158.573737065	0	410.524261548	0	0	0	0	140.775991049	145.000477777	174.784832225	3566.30678173	143.849354052	206.494371893	0	526.030763857	771.35183845	195.306196416	0	496.961885632	0	291.961830954	182.060346906	164.619296476	3694.90521067	0	296.288296512	163.782316759	878.431041846	0	0	0	699.159400653	250.175873639	0	219.563635936
RP11-54O7	1598.14998158	3465.41172557	5361.89345884	3111.11603704	22549.1377421	10750.0873445	5213.71903268	4096.09437401	4357.39815399	41930.3955434	0	4298.22134228	8856.42026814	10155.2624224	10617.3702168	17137.1369581	11166.5213945	2818.8293289	19920.0211152	1587.5444438	11162.1936501	1178.21434547	6674.63982733	2194.27327589	15753.0812301	10233.461372	3456.47904034	4088.86326535	2201.28797359	22595.2044906	817.300452519	12052.4137561	6932.14350022	1936.29024216	0	5333.0925823	6199.96114691	1932.76490717	18579.4300494	17978.2831638	5483.05641328	6301.68365233	6307.14370748	1878.60986627	690.508903335	7802.08452193	2093.82864944	22643.9752469	5512.86530485
RP11-465B22	32938.3790538	60145.8838413	17448.9992108	14511.6151769	30371.4865961	105145.113862	50649.0429782	40729.8191152	69955.2073971	23536.240757	9456.17886822	14142.9498658	72212.8684853	17825.8215939	54850.8090386	26510.3440049	73795.659725	49779.9286838	67345.9120131	40813.6397117	23106.537788	33229.8776476	6055.55657213	110443.403686	94254.9749066	17761.2540072	86236.8434916	24616.5200801	22684.622381	48495.2382753	13298.5437518	24246.1396788	33086.5365957	19533.6990966	16964.179274	40826.2151574	138992.219724	16772.5890609	11516.6303261	45056.3606316	145720.242932	17317.2937217	20867.1747881	23367.1030994	12883.3503632	13118.1755072	908.515240797	72519.7259503	16544.9442164
RP5-902P8	11738.4583442	14847.9044304	2461.45401473	7855.11315201	13802.0063373	37012.362129	24998.0719572	5014.32215766	9001.46723916	25053.9270503	11433.7868688	15785.280719	8131.33322864	4238.10792215	13403.6537751	5472.72921928	37854.6582227	10352.1919214	6096.38073117	23321.1207183	9821.31609906	5949.63793749	10585.0348777	17460.0848191	21314.4183095	12159.0559267	53155.9985751	56311.5379526	4042.1311328	22968.0159265	6003.09572142	8047.75740438	49643.8767858	2666.6453335	3365.24426205	64353.5415695	45538.8959095	28392.4295136	9747.60406938	5122.66870549	67331.7724318	17839.4153686	11581.5387377	10348.8332984	2535.90404266	8954.14671011	7689.61632659	42570.1690036	11810.2124172
RP5-890O3	132605.045622	421442.545682	94868.0087491	87312.7461899	182284.367052	144290.680134	170355.342867	80802.3590957	138240.149725	203842.967824	136001.340259	116257.979078	335006.715894	264728.031375	130363.633566	169105.206167	213815.074068	157531.664552	143813.779386	245047.355644	83423.6616745	159580.891698	86627.2673021	99958.8116147	242804.513534	184366.052554	172922.452715	179613.382195	102069.047024	105359.966757	65820.2120907	105618.997515	278289.643692	99232.3667628	163990.270904	219394.981154	247971.675751	152115.107506	125228.934145	180036.589789	168934.246526	217865.202954	122174.357238	80230.2685116	105320.49659	136852.301856	95808.9339915	139467.444877	97539.1544028
RP4-758J18	163513.52862	505284.478393	154652.668329	203696.164103	177185.989425	185988.219075	201315.629517	178790.869441	187758.129328	273379.062044	146928.689496	140442.892876	454170.38445	224906.064908	138387.959752	145240.002154	247549.78785	169100.287618	220778.919174	353433.60488	90746.42404	184063.911386	70402.0101924	231259.022897	337308.35741	105887.538002	226308.34512	191060.030413	122774.33031	201406.685708	179286.911465	181899.237531	170040.675605	66819.2674261	90249.8536431	192992.475887	287584.890871	230377.156969	137142.9986	112980.711897	264005.094723	92177.4096776	177210.442916	141104.805068	152246.137696	147355.112176	120100.767473	126716.582273	141225.417576
RP5-832C2	4657.53086017	6991.8516443	5258.85374042	6277.02088578	10110.084604	11447.2312762	12467.2653118	13467.7867376	8547.32372305	13428.4465227	3908.49392154	3693.68806925	3143.58658494	10762.0910929	6843.04923596	4175.85389322	10590.8811454	7835.83570325	2977.09977638	9965.03385287	4170.54831763	7791.86064878	5441.14120319	6394.82878071	8549.97013784	7152.27752132	8329.85126179	12145.4418959	16284.9209774	12301.6116378	1648.99410672	10561.9633855	8236.41590652	6294.09529217	15064.3133196	9393.74198303	6022.90371292	6715.92108749	9916.94607249	8894.57184085	8297.00480815	6474.89747	4241.78679613	2807.63207049	6965.89062646	9401.21476813	11500.1121848	3625.93062531	8857.05703785
RP11-345P4	40494.8952611	16069.5674532	4439.96452024	16487.6022891	59439.2575134	18990.3090079	67541.249091	4974.65188743	11907.0041328	21824.5307726	17736.8427945	20880.5295587	7089.18450788	5809.96313884	8132.42399645	10612.072244	29873.4347921	6909.10530447	1099.6636129	19981.6247927	17561.6158535	12097.8253574	60495.4841427	23984.2401738	1922.34468931	23926.335598	14597.0610106	24377.9063035	5103.83013287	5345.76115888	7038.43976199	5080.78355118	16991.0639632	5130.76064168	10926.3943445	17159.7638362	12321.441773	20805.7656938	48938.524861	26488.7362809	9080.58920765	25916.8927002	20107.3471202	9955.83962885	3659.40583371	9044.82161351	14217.2732241	19286.2790982	17042.5850071
RP1-283E3	10522.4913436	12104.7193194	6712.65988542	13559.9085867	11065.348923	8889.08827031	3706.78074956	6014.29883721	3939.80344018	14566.0939599	10566.9667007	11692.1098769	7254.80144233	7619.58233516	13230.5571348	7876.94797701	10195.9386589	8574.03633321	3386.67813211	6183.26524657	13499.7380921	6173.27250529	6358.52360934	18110.2070195	3767.47766044	10718.0938674	12661.1664316	13840.0655299	3776.51560502	6585.42201592	4320.15460696	13920.1722322	17421.258683	9426.97715359	4078.84301578	3461.94255638	13862.7338921	21508.1458069	6809.79250624	13050.2481552	13538.01606	13684.3560588	22810.7743183	18060.0283403	10885.8137212	7144.80613744	14854.0631979	8399.5371855	8861.39640654
RP1-140A9	6231.19736196	11409.8489816	10801.4633544	7682.49928684	17583.8474777	9314.36927748	17467.3015127	17035.4123635	11892.6669815	8304.09599535	6797.80275593	10800.1113529	4220.485045	9118.94876759	14144.0422362	2324.0977562	5805.11211569	13188.7610654	5177.88628326	10316.4104999	2176.07334818	14394.1120119	1577.24029634	11407.3147124	3879.24429735	6571.81966176	33692.0866722	4782.75148504	6294.08001721	109494.287419	7223.0957211	20505.7924592	5405.69468312	6039.68678184	1270.32399296	3960.71681845	11101.990766	3014.34526914	15638.1263961	11280.0486396	43469.5623096	6006.07487173	10246.4979519	1953.25661592	2153.83902961	14703.1832899	9796.62212469	15695.8239018	12419.1590366
RP11-547D24	0	1011.28186044	0	680.918054576	0	0	1521.4756285	1195.32865561	0	0	0	0	0	808.233964335	580.945791367	0	751.991932631	493.557105544	2906.54583187	2084.75864228	814.342194734	1031.48504966	0	0	3629.28060037	0	5295.544329	894.913846644	963.574940114	2825.90050852	715.51768241	959.22387278	0	0	6417.73348116	3334.95300884	1206.18822809	1692.06741873	0	0	1200.05556257	459.741790621	0	0	0	1707.61236516	0	944.000030208	0
RP5-892K4	627.871840953	1296.63880103	150.467815724	0	949.175751597	603.347371216	390.159145916	383.154681077	366.83767824	1195.34651601	0	80.4123868849	0	0	148.974659559	83.6365017126	674.92888901	189.847752228	0	0	208.825596171	330.63569871	136.223041801	246.306652275	93.0673480934	608.137200077	387.988948523	803.204372369	123.54702521	271.747105622	91.7417810144	614.945714437	389.065727908	760.718413776	548.576519362	85.5197673383	463.962774101	867.809600838	595.867598617	417.529241486	1077.0756074	707.362488143	353.987689016	281.164679699	232.528379507	0	0	363.111546415	515.681513859
RP11-181G12	0	3337.85055775	0	0	4072.33277475	2588.59465196	0	0	0	2884.78181434	0	2070.00230288	3198.90640053	2667.66793136	958.738759986	1076.49926744	6205.08680606	814.520622033	0	1146.83041876	1343.91441953	0	3506.69867114	0	3593.65576012	1739.42991924	3745.40251841	1476.88236041	0	1165.90066993	0	0	4006.1835443	0	0	5503.69545631	1990.58057273	0	0	0	990.229896724	5311.00485729	3417.17563599	2714.18787428	0	4227.12631499	1512.56640167	3115.77924081	9292.39105833
RP4-713A8	3053.66588773	3310.76860597	0	11889.1330909	0	5135.1837112	1660.35271426	1956.65360057	0	5086.89044746	3569.28965336	4790.81668881	23973.4134844	0	1901.91989304	2847.37331591	14771.379058	2154.43182785	1585.92460197	15925.357093	2666.02089716	2251.27365807	5217.37013241	8385.41754925	11089.550297	575.105632527	1651.11726978	6836.197863	1051.52802795	3083.84274561	0	0	11258.7572021	0	12839.8062006	9462.33725917	25667.5876285	7386.06305297	1690.50739946	592.276097795	13095.9410277	6522.17866856	0	1196.51825154	659.695118602	3726.95923918	0	32965.3235701	1755.6183628
RP4-740C4	39716.0521181	57413.2483557	7737.93401162	41397.101967	11214.846913	14023.794874	20177.6197324	25648.6640653	7887.03548292	60690.2803083	6457.69071822	29157.1907257	9387.17997885	20955.6565211	13114.8452062	14871.5220777	47735.0857376	15554.738227	30533.8254693	32307.5517388	55424.3260006	22133.0036745	28021.5381141	26907.4241841	51916.655435	11897.0647114	46330.7484496	46006.082004	19814.3353701	1263.26088374	3358.5038537	13507.2430179	39880.4170773	7198.94531662	31558.0778907	19231.6085351	47854.1524059	56730.3035695	10560.5793568	28022.508868	15825.5769286	23018.0318535	13421.6777992	24752.0703361	16349.3115538	24045.6225612	12291.5657734	83555.180073	28946.5509578
RP3-395M20	1160.72265432	4194.83146426	486.787166367	847.341357044	1364.77048015	2927.88616379	631.113252221	2727.04509789	395.592623463	2900.35118419	452.23844747	1300.73390659	2144.11408188	0	481.956570171	1352.8865119	935.786414237	818.916646979	0	0	844.479762465	427.863497853	1762.81228495	2390.52285184	3613.0509724	874.408872277	627.602786431	2598.49309673	799.388308067	1465.24139705	0	1193.66794963	2769.1160736	0	0	2213.35971474	2001.32387574	701.875305535	4498.02701274	450.25769655	2737.82915162	2097.72699838	2576.71377949	227.403044722	1003.02141394	1416.6468041	760.36491433	391.574414998	2001.97344532
RP13-436F16	0	0	0	0	0	0	0	0	0	840.42794591	0	0	0	0	0	0	0	0	0	0	0	0	0	0	0	0	0	0	0	0	0	0	0	0	0	0	0	0	0	0	0	0	0	0	0	2462.99048916	0	0	0
RP11-740P5	0	0	0	0	0	0	0	0	0	0	0	0	0	0	0	818.039070364	0	0	0	0	0	0	0	0	0	0	0	0	0	0	0	0	0	0	0	0	0	0	0	0	0	0	0	0	0	0	0	0	0
RP1-163G9	802.482560048	0	0	1562.1915282	0	0	0	0	0	2673.60020319	0	0	0	0	0	1496.54055943	862.626140203	0	0	0	467.074734293	0	1828.11903005	0	0	0	0	0	0	0	0	0	696.170487975	0	0	0	0	0	0	622.584469537	0	0	0	0	0	0	0	0	0
RP11-193J6	0	0	117.923600071	0	0	0	0	0	0	0	0	0	0	0	0	0	0	0	0	0	81.8296788881	0	213.519567947	0	0	0	0	179.851942284	0	0	0	0	121.966364909	0	0	0	0	0	0	0	0	0	138.71239663	0	0	0	736.789909515	0	161.658545548
RP11-22L13	869.955089656	314.40025479	182.422119266	317.538786503	127.860973184	0	315.343884477	464.523849119	0	362.29947856	593.162794652	584.935640628	200.875177997	251.274124711	632.141534322	709.786572754	233.788881685	306.886706481	1355.43628218	0	569.639541592	561.192241694	330.304468879	199.075934305	564.158613984	1064.96735015	117.596188096	278.222276506	599.137032975	219.638034323	333.673949555	596.431601914	188.676081399	1317.52774351	166.268930601	103.681289729	0	131.512896746	361.204918202	84.3664016795	0	142.930415114	107.290692221	511.311902348	1127.63834778	132.721099748	142.472304809	0	125.038984811
RP11-168F9	12808.2098655	21363.9911354	23138.9564579	1917.97860399	2316.89438842	1104.55740385	2142.81122547	4208.6833555	0	20515.6821875	8445.1386519	5299.6394037	0	5691.49048184	11454.6693732	4593.43928254	7413.6168018	1390.22891509	67542.9511767	8808.3781378	2293.80157469	726.359890988	2244.47074632	0	9200.51134397	742.217478628	12785.3530995	6301.88022899	5428.30699247	2984.94988269	1007.71862078	0	9401.94645933	3581.12318348	10545.0193237	6575.61938812	3397.5354278	4766.13754596	18544.6891556	1528.75453515	17746.3713952	1942.469241	7776.60912624	15441.9763877	8513.86632123	1202.48095871	2581.6578374	6647.53947974	1132.87938856
RP11-46F15	3630.52399353	63853.8324545	8120.42385567	2355.84510201	17074.9901552	17637.4021463	7018.68285643	6720.36062489	14023.1861009	8063.78453568	13202.1635517	6509.52492673	12295.0464655	6291.75057124	7537.35134459	8463.15340481	39676.6418731	9818.77109969	6285.05489367	4207.50324053	3169.6502467	5353.10890722	5054.26906539	13292.6393948	5022.64427781	3190.81919269	16358.5372589	22447.6621147	2500.33754557	11610.2713015	4332.2179935	6637.4590811	22046.8911128	2932.45242462	7401.37323229	13269.038113	23474.1294228	19758.0155342	14738.9415229	3286.08490915	26468.7496189	6362.47159753	10745.9735434	6164.37739077	4183.01856554	7385.0116757	792.759882545	18779.8333984	8349.06610477
RP5-1092A11	1072.26302183	0	0	0	0	1202.11090675	0	0	0	1786.20868276	0	1922.56624142	0	0	0	0	1152.62581127	2269.51899814	0	0	624.097009639	0	814.23345213	981.484057877	0	1615.53889935	0	0	0	4331.43724668	0	0	0	0	0	3067.01661326	0	0	0	1663.77274195	1839.4014036	0	0	0	0	0	0	0	0
RP1-286D6	29060.1452866	121928.977907	21996.6377842	23456.4087652	31668.5865747	32579.2430491	49842.892121	15744.1216899	43481.6637824	56674.2822733	32033.9825324	31135.7973504	30113.4967874	12283.3297405	12949.2926302	27757.8681164	74666.7093334	24503.1118952	45645.3591185	40836.6658341	15263.9319476	31875.0248207	12379.1085858	30492.5470863	32358.6931721	29901.1606456	52887.0585368	63469.7843025	28312.0456039	22189.4391154	11599.2019024	18465.511163	52880.1138644	16316.2536508	10837.2272846	33113.3827567	51327.7386098	41144.9614137	27466.765704	20895.8576574	87543.0362934	39593.2054333	34266.1416255	68875.2860199	18374.5589532	28547.0338334	14857.9027327	82254.2248544	22004.7420219
RP13-614K11	401.669499106	0	0	0	0	0	0	0	0	0	312.995339578	0	370.986654775	0	0	0	431.773382876	283.387110761	0	0	0	296.125377116	305.011677372	0	0	0	0	0	0	0	410.830857136	0	0	0	0	0	0	0	0	0	0	263.97127359	396.299984822	314.772410891	0	0	0	0	0
RP5-1166F10	0	4453.14583319	0	352.752925722	0	0	0	309.62292572	0	603.716174915	0	0	167.363743632	0	1805.7708373	0	779.146191151	0	0	0	0	0	137.6003571	0	0	0	0	231.807245785	0	0	0	0	0	219.545667804	0	0	0	657.437846374	0	0	0	357.257221985	0	0	0	0	237.408111191	0	0
RP1-37J18	0	0	0	0	0	0	0	0	0	0	0	0	0	0	0	0	593.213577354	389.345634579	0	0	0	0	0	0	0	0	0	0	0	0	0	0	0	0	0	0	0	0	0	0	0	0	0	0	0	1347.06078073	0	0	0
RP11-542C10	0	0	0	0	0	0	0	0	0	0	0	0	0	0	0	0	0	0	0	0	0	0	0	0	0	0	0	0	0	0	0	0	0	0	0	0	0	0	0	0	0	0	0	0	0	0	0	0	0
RP1-58B11	0	0	0	0	0	0	0	0	0	1293.08035756	172.820644186	0	0	0	368.354550095	0	0	0	0	0	129.085474592	0	0	203.005836367	0	0	0	0	305.482214367	0	0	0	192.400682888	0	0	0	0	0	0	0	0	291.503928526	0	0	0	812.046658036	0	0	0
RP11-154H17	0	1498.81443778	0	0	0	0	0	0	0	0	0	0	0	0	0	0	0	0	0	0	0	0	0	0	0	0	0	2652.69228372	0	0	0	0	0	0	0	0	0	0	0	0	0	0	1022.95615917	0	0	0	0	0	0
RP1-120G22	19913.4561197	70527.5460444	20043.2684057	27135.8454342	65559.5301021	10046.2125779	29594.981846	11058.371187	10858.9128599	9122.42291553	8534.50519848	29456.4613417	9196.15067525	12653.7793676	48784.0775386	2785.22826338	36390.04347	7024.70166092	64120.8616189	15825.0462017	5795.18651808	24957.5721274	3780.36959917	5468.26832246	32026.0009804	14251.361005	74293.7250874	42032.5408289	13714.3734863	63347.2697327	12220.5877186	6826.22279836	17275.3417387	8444.37688943	0	26580.8106483	109013.249831	24082.8643196	7716.85322159	5407.26141135	11956.1091234	8506.43937461	13753.077251	20286.9986088	10324.7521737	18228.0843742	30003.2351314	34932.9958269	43504.9661491
LINC00337	1786.89291709	17758.9497034	7868.61842751	3913.35931188	28626.3645535	2504.10046451	1295.43642039	5152.32761171	7308.01613245	7627.69411086	870.257071763	3604.38383184	8251.97615488	1806.41490189	6492.1123154	3748.90071297	3841.63000361	6461.05794308	25056.6675096	1109.39678491	3640.13377492	4281.4281527	3053.01302704	613.354725783	10660.8232995	12451.6342349	1449.2596095	2000.1457249	3691.89306432	2030.12021695	5711.40227205	5206.56471243	2519.02164106	3518.07274563	4439.72581278	2768.50579749	4236.33349187	1080.51308164	4946.11363758	3985.64906403	3065.30512838	2055.05944626	3966.76293413	1750.39613653	772.058619516	1363.04963273	292.63895961	904.223174336	3595.63143622
RP1-202O8	49324.0990042	7750.2797851	0	12524.2363543	3782.28058281	4808.44362701	3886.77059891	3664.31234598	4385.33019344	893.10434138	7519.91367139	17303.0961728	3961.41875242	2477.66309295	2671.35757056	4999.12765222	114109.955316	12860.6076561	22275.237287	13846.9154265	20595.2013181	18972.2720244	26055.4704682	9814.84057877	25589.0131903	29079.7001883	0	54867.652364	1476.93252929	5414.29655835	6580.31646387	7351.31685977	26045.8998521	0	0	17379.7608085	225553.762218	53167.5543055	2374.41637587	17469.6137905	0	8456.10541381	50780.5929269	12604.3482481	0	1308.68298071	0	62217.9393129	7397.60558001
RP11-242F24	0	0	0	0	0	0	0	0	0	0	0	0	0	0	0	0	195.9184793	0	0	0	0	0	0	0	0	0	0	0	0	0	0	0	0	0	0	173.772854117	0	0	0	0	312.653701048	0	0	0	0	0	0	0	0
RP11-312B8	2720.7059325	35397.301939	16734.9216929	7944.59089219	34122.5506073	6100.35077017	13149.4600503	19370.084841	13599.80713	9064.47105035	2826.76272949	3252.14819633	9213.87819462	13621.1767387	7531.29724712	5073.81341474	9748.7146929	9597.60443793	11304.0119823	16215.9057766	1583.55217145	11366.2195954	2754.65967901	9131.349271	26347.7026332	7515.17553059	13730.1342121	12761.687095	6245.8231058	33886.9732064	1855.17355728	11191.7156434	5507.29569162	8790.29112345	19412.9994297	10376.1236747	13291.3223302	6580.71521407	15061.8099024	10553.9319113	14779.4794706	5960.02610491	3579.11407979	10660.5451447	9404.23210037	8854.8959273	5940.92345714	6118.93995484	11470.7450379
RP11-334N17	0	1558.93879918	0	0	0	0	0	0	0	0	0	0	0	0	0	0	0	0	0	0	0	0	0	0	0	812.398500962	0	0	0	0	0	0	0	0	0	0	0	0	0	0	0	0	0	0	0	0	0	0	0
RP3-453P22	0	0	0	0	0	1134.24980718	366.735612962	0	0	0	0	0	0	584.44875378	0	0	543.779112574	0	0	0	0	372.942847255	0	0	1574.63948629	1143.25434208	0	0	0	1021.73015698	0	0	0	612.89832262	0	0	0	0	0	392.462521791	433.891056898	332.44769268	0	0	0	0	0	0	0
RP4-549F15	1042.56044505	1507.11811888	0	5073.87691637	0	1168.81143565	1511.64152933	2672.10588665	0	868.364608932	0	0	962.921040234	4818.05953255	865.78624863	1944.25906474	1120.69711844	735.550478623	0	1035.641874	11529.3710728	3074.45405382	3958.39254429	1908.59226767	4326.98717562	5497.7549525	7891.97465098	0	0	8422.90567083	2132.67874314	0	1808.88619867	0	6376.25228599	994.019234769	898.793998213	0	0	808.842427182	894.224228067	4110.93213331	2057.24701262	817.013155137	0	6362.15687297	0	0	10789.0286368
RP11-338N10	656.067961643	2529.08607049	183.429097844	425.72215382	5142.67086797	490.343902696	0	373.670433887	1490.65552769	5282.34113359	681.642378116	588.164512555	0	1263.3058478	1271.26196995	203.915607894	1645.55585025	154.290367683	4543.06117822	1303.42841319	509.141314081	322.451456545	1992.76658941	0	1134.54559152	988.473248701	709.471947124	2517.82268765	602.444297247	1104.25223241	0	0	4932.6571356	264.96011158	0	6463.7241466	565.597850125	264.4777081	1694.92766866	169.664216277	1500.5924292	4024.14313417	431.531767319	514.134367817	377.954321291	4003.61179165	0	885.308569875	2263.12570475
RP3-467L1	4534.5098875	1966.51677439	11790.5130109	6179.12624948	4265.31882592	2541.8128209	13149.4600503	2324.41018092	2472.69220546	2266.11776259	6360.21614135	8130.37049082	2512.87587126	4191.13130421	2635.95403649	5919.44898386	10236.1504275	5438.64251483	3768.00399408	1351.32548138	4486.73115243	5348.80922135	2754.65967901	415.0613305	5645.93627855	3757.58776529	21575.9251904	11601.5337228	1873.74693174	1373.79621107	2782.76033593	4974.0958415	4327.16090056	9339.68431867	3466.60704103	6052.73881027	4691.05494007	3838.75054154	4016.48264064	18293.4819796	10501.2090975	14602.063957	1342.16777992	1066.05451447	4310.273046	9408.32692276	14258.2162971	14073.5618961	8342.36002758
CTA-215D11	470.455400828	680.087051143	789.203693473	0	1106.31707047	0	0	0	1282.70908158	0	0	1265.28890763	1738.07247762	1087.07468203	390.686044694	0	505.714574694	995.751460435	977.326035966	467.333395644	1095.29025192	0	1071.73478137	430.626130394	488.13824075	0	508.750508751	2407.31824747	1296.00829445	0	481.18564142	1935.23416333	1224.38984573	0	0	897.102359379	405.580791694	0	520.887592458	729.980290532	807.03736583	309.176354192	464.166357222	368.677186256	0	1722.55397336	616.370808679	0	1622.84972412
RP11-431K24	0	0	0	0	0	0	0	0	0	657.189987053	0	0	0	0	0	0	0	0	0	0	0	0	0	0	0	0	0	0	0	0	0	0	0	0	0	0	0	0	0	0	0	518.534765941	0	0	681.823256753	0	0	0	0
RP5-1115A15	0	0	1711.01071756	1985.54966592	1199.25969699	2286.94270065	3697.17203311	2614.17405171	2780.94109828	11043.9975873	794.787623806	914.391261163	942.044703318	1178.40073933	0	951.05355335	0	0	0	4052.75573459	0	751.949805847	3098.05898859	5601.64072057	5291.47144444	0	0	0	0	0	1043.22090281	2797.08641494	2654.50373057	0	6238.01375404	0	2637.92384841	1233.51256271	1129.2955934	0	3499.34901173	1340.6020778	0	799.300132804	0	6224.22393264	0	0	0
RP4-633I8	0	0	0	2075.54625134	1253.61707702	0	2318.84954145	0	0	3552.1770405	830.811992023	0	0	1231.81267086	885.40746673	0	2292.19070683	0	0	0	0	0	1619.24046288	0	0	0	1152.97565722	1363.91968695	2937.12927921	0	2181.01140587	0	0	0	0	6099.2794972	0	0	0	0	3657.95973181	2802.73182271	0	0	2763.99172922	0	2793.74870789	0	0
RP3-477M7	0	0	3873.39236061	0	2714.8885165	0	0	0	0	0	1799.24314837	0	0	2667.66793136	5752.43255992	0	0	0	0	0	1343.91441953	1702.26673839	0	0	0	1739.42991924	0	2953.76472082	0	2331.80133985	2361.64731986	0	0	0	14121.6384984	2201.47818253	0	2792.43028	2556.50352126	0	0	0	0	0	1995.27419307	0	3025.13280333	0	0
RP3-510D11	13373.3514956	4971.19468855	5448.30976205	10785.4654695	20666.2275093	9852.42776671	9972.23010921	30358.9207893	21877.6777366	61741.1644893	9527.7687938	15757.235804	4234.8974074	15892.2593109	6346.16925392	14251.3202512	34090.8099083	13748.4465603	44450.9709759	17839.3255596	10007.7281901	20000.3380339	20020.223327	55609.7906458	28544.936718	15831.4611431	21899.5142853	29816.5305778	14736.3379674	15820.7394459	9770.26683087	33530.9607996	23866.2792264	19906.4397333	14605.5017465	19672.4984392	38869.8748588	24953.2703802	18614.4601569	17193.4444064	327.730909982	17828.6466174	13948.5524607	6886.96469757	22452.4052345	28446.9150253	6507.87452818	16499.3954518	27239.7111053
RP13-392I16	531.588023534	1536.91988959	0	517.420781585	0	0	385.383186502	0	724.694396373	442.767830261	0	2859.40996075	490.980925882	614.166487023	0	0	571.428897959	0	0	23762.7150328	0	0	403.666584319	0	1103.13726723	400.461972932	1149.71866384	0	0	1610.52380676	1631.13776753	0	0	0	0	8109.3998588	0	0	1177.1471016	0	455.953314028	1048.05543794	3671.37231701	0	0	10380.7395758	11839.8912402	717.333356288	2444.97133577
RP11-558F24	893.977008699	0	0	0	0	0	0	0	0	744.607182481	0	0	0	2065.70010837	0	0	0	0	0	0	0	0	0	818.29193424	0	0	0	0	0	0	0	0	0	0	0	0	0	1081.15471648	0	0	0	0	0	0	0	0	0	0	0
RP11-84A14	11119.8549287	4946.08764467	17218.9896758	5828.03953076	11063.1707047	19179.1331032	6821.28240109	8769.36568255	10494.8924857	14961.5275007	1333.07560538	13803.1517196	3160.1317775	9882.49710937	4262.02957849	11166.2333105	13792.2156735	5431.37160238	5330.86928709	7647.27374691	2489.29602708	10089.799213	12341.1883915	8612.52260787	9762.764815	14820.7335619	9250.00925001	6565.4134022	3534.56807578	8638.26405446	2624.6489532	15247.2994687	11130.8167793	5181.7767276	13078.5629275	12233.2139915	10323.8746977	5172.34245045	13258.9568989	7299.80290532	10271.384656	8432.08238707	5063.63298788	4692.2550978	13304.8510965	8351.77684052	8965.39358078	16159.5641535	4917.72643671
RP11-807G9	0	0	0	0	0	0	0	0	0	0	0	0	0	0	0	0	0	0	0	0	0	0	0	0	0	0	0	0	0	0	0	0	0	0	0	0	0	0	0	0	0	0	0	0	0	0	0	0	0
RP4-736L20	472.226249263	682.646977307	0	459.641045624	1110.48137563	529.411453287	0	0	0	393.324496643	0	0	0	0	392.156632065	440.324668991	1015.23628546	333.166527958	0	1407.27747747	549.706525429	1392.56952752	358.589638266	0	0	1067.22864556	1021.33100878	0	650.443309638	953.785742525	965.993759439	2590.02481082	409.666196814	0	4332.17140886	1350.71873432	407.107444611	571.099291894	3137.0896409	0	405.037573817	0	0	0	0	1152.69191024	0	0	0
RP5-1113E3	0	0	0	0	0	0	0	0	0	0	0	0	0	0	0	0	0	0	0	0	0	0	0	0	0	0	0	0	0	0	0	0	0	0	0	0	0	0	0	0	0	0	0	0	0	0	0	0	0
RP4-734G22	3562.70655682	2815.45567051	4143.74272984	4115.07235759	4021.44788964	1810.67670847	4924.61634914	1704.508791	2784.626556	3521.35384581	1702.72941139	2981.03322931	2193.70500773	878.111569481	1183.44882906	7219.86849342	14961.4409073	1441.11448689	4045.9792982	1698.75069981	1686.55068451	3256.93064335	5338.60903335	4695.96083125	3795.19318821	2111.33377929	5136.94821407	6927.5345251	2224.62612704	2302.66485965	1360.4137786	2279.71545178	5645.72035389	1956.81887782	653.68054011	3260.95518744	4013.31996324	6261.9094768	2103.79943943	2469.20002351	3992.91489846	4370.53536155	2765.19652416	1972.97901013	2257.68435453	3188.70692195	4107.58282194	7115.20810349	4205.79506944
RP4-635E18	28551.7760503	58159.1685115	31931.0000118	38317.6851907	26449.879386	34434.2596634	36380.1728058	18109.916103	35974.8294144	48643.3899038	61015.0236855	19779.2289009	55937.964797	51979.6629569	21555.0921211	35093.8761186	87889.7053951	32047.1734393	51225.3646437	34378.5486451	15359.2426131	42417.7478408	41719.6374662	43557.585603	94261.1775241	29330.3872589	74850.6495633	122856.241595	39923.014128	61599.7588435	23450.8864324	26099.709789	108084.06914	20441.2157806	13228.891237	65993.7367819	60790.5002723	58072.920754	68014.7477048	26849.8497667	67531.402566	133336.744934	34145.571106	20340.8102762	21681.9795647	81309.8274014	46475.7759187	47868.3969341	75608.6308247
RP1-69M21	0	0	0	0	0	328.358699043	0	250.228333354	2795.00811551	6098.82536623	1369.38505767	0	270.51711714	0	243.228665958	4915.87369755	0	0	0	290.946861102	170.47319096	0	0	0	0	882.574558244	0	0	0	295.78491704	299.570827343	0	0	354.860974342	3582.61023384	279.253652725	0	0	0	0	0	0	0	0	0	0	0	0	0
RP11-56N19	402.959658097	0	0	0	0	451.756882516	1314.59403875	0	274.670038882	0	314.000677927	0	0	0	0	0	0	0	0	0	351.806290766	0	0	0	418.105559529	0	0	515.485706097	0	1017.35443896	0	0	0	0	0	768.396025164	521.088811598	0	0	0	0	0	0	0	0	245.903493698	0	0	0
NPPA-AS1	8967.33490016	11056.7761643	5309.28903808	3337.30965221	3411.20890685	1478.41951041	3250.5059795	6083.86266694	4314.6486276	10105.1595627	17674.6954827	7802.76271001	5115.56020043	13102.7922431	3504.40180245	12542.3103157	16160.1854282	3721.56584138	4931.1474835	9169.82135813	2916.68041856	3499.96538923	2803.88450159	7725.31810657	10946.3375641	8146.18791189	19394.5533819	18894.1586347	5085.94705602	9588.65470375	809.282087883	1808.20758078	24482.0768031	5751.88110478	1613.05331131	6286.63181065	7730.76211217	7017.27749409	7300.45679688	3887.7716945	904.877214666	14386.341919	4944.16862634	2480.23895449	5014.05273746	9335.02737255	3455.47755391	12100.664718	10311.0283803
RP5-888M10	2577.83781276	3726.50438982	720.733966642	836.37879763	0	0	1245.89632897	4404.70422411	0	0	1339.1627086	0	3968.2020037	1985.52453339	1427.16363359	0	3694.71835393	1212.48275243	0	0	500.132535122	0	2610.00859998	2359.59523503	0	647.322093233	14867.5947763	2198.46415294	2367.13843736	10413.2498191	4394.38941936	0	14163.4137405	1041.08756171	3941.48471788	819.271561077	0	2078.384181	1902.78572587	0	0	4517.64535806	5086.7545997	1346.76597719	6682.80192064	11536.1301108	34899.5343727	1159.52515126	0
RP11-474O21	0	0	0	0	0	0	0	0	0	0	0	0	0	0	0	0	0	0	0	0	0	0	0	0	0	0	0	0	0	0	0	0	0	0	0	0	0	0	0	0	0	0	0	0	0	0	0	0	0
RP5-845O24	0	0	0	0	0	0	0	0	0	0	0	0	0	0	0	0	0	0	0	0	0	0	0	0	0	0	0	0	0	0	0	0	0	0	0	0	0	0	0	0	0	0	0	0	0	0	0	0	0
RP13-221M14	0	0	0	0	0	0	0	0	0	0	0	0	0	0	0	0	0	0	0	0	0	0	0	0	0	0	0	0	0	0	0	0	0	0	0	0	0	0	0	0	0	0	0	0	0	0	0	0	0
RP11-219C24	0	0	0	0	0	0	0	0	0	0	0	0	0	0	0	0	0	0	0	0	0	0	0	0	0	0	0	0	0	0	0	0	0	0	0	0	0	0	0	0	0	0	0	0	0	0	0	0	0
RP4-597A16	0	0	0	0	0	0	0	0	0	0	0	0	0	0	0	0	0	0	0	0	0	0	0	0	0	0	0	0	0	796.821002927	0	0	0	0	0	0	0	0	0	0	0	0	0	0	0	0	0	0	0
CTA-520D8	993.045700956	0	39980.7675849	0	0	0	0	0	0	827.123018006	0	0	0	0	0	0	1067.47139777	0	0	0	0	0	0	2726.92008693	0	0	1073.87970185	0	0	0	0	0	861.488018102	0	0	0	0	1200.9660571	0	0	0	652.614995657	0	0	0	2423.9985553	0	0	3425.54031476
RP11-344F13	0	0	0	1299.05643036	0	0	1935.11557478	0	0	0	0	1196.4906928	0	3083.89980718	0	1244.46369215	0	0	0	21212.2959725	0	0	0	0	0	0	1443.26385461	1707.31790601	9191.54818761	0	0	0	2315.6309139	0	0	0	0	1614.06431078	0	2070.86607243	2289.46770448	1754.19208052	0	2091.78545393	0	1628.8926462	0	0	3069.21933639
RP4-704D23	650.024733441	0	0	0	0	728.740808757	1413.7372852	1666.02802259	0	3248.49351113	0	582.746762295	0	0	0	5455.00665056	698.742072116	458.607465946	2700.72825137	645.711082065	4540.06322038	2396.10948495	493.60266269	1189.98585256	0	0	1405.87359931	0	32232.3306392	656.448391012	0	0	1127.82023786	0	0	0	1681.16390339	4716.74751958	0	22693.6877886	3902.77137189	0	641.335208597	0	0	0	0	4385.76870684	0
TMEM51-AS1	2703.46202166	2835.2924949	2623.26861493	773.944887385	10845.0236767	5942.82997563	2766.94272044	9646.3022508	2673.81611372	2340.05916376	1528.343018	2328.60681593	2252.15025269	4532.0296603	3389.61413425	2273.68774853	5527.24661919	2879.73192314	2863.15233072	3633.35259712	6664.3012511	1211.4864548	7285.78386581	1504.15887799	10340.2804801	1477.53547083	2350.28404042	4814.63649494	5914.17869581	1177.72388799	2060.28781679	7268.4851205	6622.05212337	2633.21837087	972.602989538	4144.36019544	4981.21761066	3590.04275997	4460.55853823	4811.70106999	3728.28529567	10102.663968	2719.62260006	2617.08875877	10718.8377848	7698.92667905	1180.65394338	6008.62667115	5302.83290134
C1orf195	673.281432312	1946.58189951	1129.45072411	1310.67589754	0	1509.62765034	488.106075212	1150.42364351	917.859807929	2803.93223457	1049.29027973	1207.19275624	621.850618112	3111.48388417	1118.24270396	0	723.741788471	1900.06241705	0	0	1175.62459955	0	1022.52573058	0	0	507.204073052	728.086595707	0	1854.75247864	5439.47933304	0	923.188628901	584.085794026	0	0	8345.13822678	0	0	2236.36891216	1044.69451239	2309.94594871	0	0	1055.2477603	581.806249501	0	0	908.536701703	1548.33605163
RP3-467K16	4141.56061252	2245.12919222	1736.89946294	3527.2866486	1826.10795676	2321.54568512	4879.04655924	9288.04893475	2117.26395859	3018.37326929	2017.03324061	4177.01977761	956.29847462	5383.03831542	2579.49520569	2896.33090387	3895.46302378	1460.98334406	2150.92387558	514.259582552	3013.17813457	4961.62753596	4717.40206378	2369.33221675	1611.46049216	2339.97587485	0	9271.65212231	12835.2953508	2614.05514715	1059.0055382	0	11676.895365	23834.7474238	15039.4478781	4935.91394431	3124.14364991	6260.88219587	2292.76519376	1204.91932412	2664.22239064	2381.55100891	5107.74533395	4056.97041272	6710.3788199	6950.24069947	2713.04895154	3492.92996047	5357.4131195
RP4-680D5	0	0	0	0	1966.78590306	0	0	1429.08181493	0	0	0	0	0	0	0	0	3596.19253116	0	0	0	0	0	0	0	0	0	0	0	0	0	0	0	0	0	0	0	0	0	0	0	0	0	0	0	0	0	0	2257.20896112	0
RP11-288I21	3928.13380991	13841.3020193	1853.31591422	2389.65370751	7505.34737959	3027.6257084	4271.64455646	4614.45204431	2008.15511793	4294.24142225	5739.26875116	3741.66756769	4535.08800423	1134.58544765	8155.22076336	3662.76593541	8181.16206941	2771.38914842	510.020110093	731.637410011	3286.5852308	2171.97243333	3542.15452854	4269.74375863	4839.98777521	5733.42425435	7168.30462427	7223.52507395	6425.09004426	3966.95231203	1004.43186728	5386.17031761	12992.0035815	2379.62871248	0	5383.78454422	4233.06762368	5641.32849129	4892.87758081	2857.06571637	5475.00887452	7905.87937661	5328.98100921	2693.53195438	4030.89639657	1498.19871568	7076.40328294	8613.61540936	4516.73765355
RP11-169K16	5376.63315232	7772.42344163	3865.48747824	1495.2404627	4515.57987948	4305.51967622	556.839379681	3937.26622482	4188.43781741	1279.50866867	1197.04748238	2754.37041118	6384.75604025	7986.67113329	1275.7095337	2864.80621376	3302.62579392	3793.3388969	0	1525.98659802	2682.34347408	566.264241546	8748.85535809	2812.25228012	2390.88117918	1735.88006226	7475.5176796	4912.8943826	3173.89786397	7756.80853869	1571.21842096	36861.6031111	5997.01148927	2791.81440018	0	8055.613023	2648.69088453	2786.73144269	5102.57233428	2979.51138993	11199.7022197	1514.33316339	2273.46787211	1203.84387349	9292.27695631	4687.22169621	6037.91812583	1036.47350255	6182.2846633
RP11-5P18	0	2318.47858344	1345.23356842	0	15714.7311147	1198.69581895	387.572863698	0	0	2671.70133941	0	479.276101376	0	617.656069336	0	0	1724.02695918	754.357166997	0	0	311.162003385	394.132781758	0	489.347875447	3328.21527784	402.737325051	0	683.897229396	1472.73669824	0	1093.6037305	0	1391.35209742	0	0	3058.30349788	0	646.542806306	0	1244.28458613	0	351.336766128	527.461769571	1256.85404405	0	3914.895394	0	0	0
RP11-276H7	416.332213122	7222.16337497	2793.64139283	405.236629825	8321.85406993	0	1207.30661966	2134.13766611	567.57039008	346.769495381	648.842108815	746.483131347	1922.64654604	481.006496474	2074.43917537	1941.03297116	5817.95528409	293.731994229	864.890297315	8684.95691021	726.962556582	1227.74105468	2213.02167244	3048.68056916	6911.69190442	0	900.443378319	6391.11039152	5734.54997546	420.446480527	1703.31200503	6279.52088397	5417.65418463	5548.62817735	0	396.947946628	1794.60527298	1007.00472487	2304.81235601	2261.00089988	357.096179571	7113.79222036	821.533375615	1631.31498343	13311.3923213	8638.17626758	6545.53071163	3370.83196627	10531.7681211
RP4-798A10	2373.46868886	2450.76414826	3981.56818329	6270.58049899	4784.07381826	2660.88873684	6145.29946044	1448.39373135	1848.9500275	8754.83634104	2113.70546439	1519.86655572	2192.16348529	3917.38624155	844.726583123	0	7654.0584278	4066.73269127	2817.51650008	2020.90117035	2960.2439241	7249.20258772	1544.8429281	4034.69527576	7388.03823838	5108.59597902	1100.0011	2168.7551779	1401.09004806	10272.5302269	693.60092457	0	1470.73855343	2464.8451461	3629.00665015	5819.04233111	2338.483844	1640.23832663	3378.73032945	1315.27980276	23847.5906299	1114.14902412	334.534311512	0	292.999723848	2482.96068232	444.231213462	1372.62707095	1559.49523038
RP5-875O13	0	25371.1231514	4439.63587742	271.157596863	6878.65536045	4684.76234201	201.962469314	0	0	1160.17625398	0	249.748612412	257.301625111	0	9485.19782826	259.762221455	1497.30444025	0	0	276.733320885	162.145115014	821.523251983	846.175993183	254.996968405	867.158976906	0	0	356.375758323	383.718221896	2250.68019776	854.80794923	381.985524468	0	0	0	5312.22714658	4322.99289444	0	308.445650604	1080.65179946	19354.5600688	1647.72002234	4122.86919813	0	0	340.005718896	0	751.846064029	960.976890668
RP5-1182A14	1110.21923499	0	1862.42759522	4322.52405147	1305.38887371	9957.30804177	5634.09755842	0	9081.12624128	4623.59327175	2595.36843526	1990.62168359	3076.23447367	8978.78793418	1843.94593366	8281.74067696	15514.5474242	271016.720008	9225.49650469	1102.85167114	16800.9124188	3273.97614581	843.055875214	10162.2685639	1151.94865074	3345.45223405	1200.59117109	4260.74026101	1529.21332679	5605.95307369	2271.08267337	0	963.138521712	4035.36594716	16975.1259236	2117.05571535	7656.98249805	0	0	3445.33470458	14283.8471828	4377.71828945	0	870.034657831	0	0	5818.24952145	2996.29508113	0
RP1-163M9	0	0	0	0	5449.83778558	0	0	0	0	0	0	0	0	1071.00953895	1539.64943722	0	996.481920579	0	0	920.853981565	0	0	0	0	1923.69750049	0	0	0	0	0	0	0	0	0	0	0	0	0	0	0	0	0	0	0	0	1131.39834046	0	0	0
RP11-108M9	1718.55854184	1242.16812994	4324.40379985	2509.13639289	1010.33522418	6743.3481687	3114.74082242	2936.46948274	1171.42381879	3578.53451854	5356.65083442	6162.74658208	1587.28080148	2978.28680008	0	1602.46009674	3694.71835393	1818.72412865	3570.14077065	0	500.132535122	0	1957.50644998	4719.19047007	1783.15339087	1294.64418647	929.224673517	1099.23207647	3550.70765604	7809.9373643	878.877883873	5891.12378488	745.442828449	1041.08756171	6569.14119646	3277.08624431	740.786834144	4156.768362	4756.96431468	666.648667153	3685.10212708	3388.23401855	2543.37729985	4040.29793157	742.533546737	0	0	1159.52515126	2964.10908514
RP1-37C10	3550.6067987	2566.36623073	1985.41809679	1151.99343825	11828.5472944	3317.1456625	4719.12618943	1516.71419038	1613.47054287	3943.13992232	1383.38034521	4774.67512315	0	0	1965.71594815	1655.37151503	1272.23792376	2087.52926716	0	0	1722.15448415	3490.1821177	1348.09406461	541.668088545	0	445.797290622	0	3028.07326726	815.09955626	1195.23150439	1210.52991552	0	2566.85502249	3584.87698136	0	2821.07660182	1020.32903571	5725.36019672	1965.61355644	2295.53550482	3552.99469233	1166.70322337	2919.28526555	463.744888372	511.367442564	722.244852561	2325.92757992	3992.70453028	2041.32040769
RP11-380J14	0	116.353644336	202.533026554	0	0	90.2354423161	350.108592015	137.52925935	0	67.0401248555	376.317322307	0	74.3401401891	0	133.682136765	0	86.5208853198	0	167.207191782	319.817550484	1264.87753643	59.3390672278	122.239496021	147.348547611	417.569068221	0	0	0	443.458783389	81.2839218127	0	1545.09713639	69.8254830754	975.184670721	246.132065359	0	416.336142029	0	0	0	0	105.791737961	0	0	556.423769839	0	105.452661878	217.224985565	0
RP1-20B21	0	0	0	0	0	0	0	0	0	0	0	0	0	0	0	0	0	0	0	0	0	0	0	0	0	0	0	0	0	0	0	0	0	0	0	0	0	0	0	0	0	0	0	0	0	0	0	0	0
RP11-473A10	0	891.917444121	0	0	0	0	0	0	0	0	0	0	0	0	0	0	0	0	0	0	0	0	0	0	3200.90649672	0	0	0	0	0	0	846.004005829	0	0	0	0	0	746.173992852	0	0	0	0	0	0	533.16343192	0	0	0	0
RP11-174G17	0	0	0	0	0	0	0	0	0	0	0	0	0	0	0	0	0	0	0	0	0	0	1993.92517463	801.164893756	0	0	0	0	0	0	0	0	0	0	0	0	0	0	0	0	0	0	0	0	0	0	0	0	0
RP11-422P22	0	0	0	746.097583222	0	0	0	0	0	0	0	0	0	0	0	0	0	0	0	0	0	0	0	0	0	0	0	0	0	0	0	0	0	0	0	0	0	0	0	0	0	0	0	0	0	0	0	0	0
RP5-1126H10	2433.86685907	4637.86583966	5474.78164785	3015.09393714	5203.13730969	4092.90142061	3448.73772189	2362.89982628	1659.00057582	1935.05940632	1206.89972504	1289.34005873	4598.07533763	3323.2147834	2296.802144	3094.69807042	5351.47698089	2887.93290505	5056.12528895	4615.6384755	1867.33787805	3180.86703584	2940.28746602	1822.75610749	4935.90696114	2083.53231067	2871.25507584	5943.99567277	4419.07590113	1228.95937753	1244.68948986	2578.79527938	5566.49900468	1876.52819765	4397.96472342	4957.53214472	4482.6095731	3344.8422666	2939.75360823	2918.2045712	6167.8340716	4071.4581622	3383.69360938	1473.84177927	2867.98671491	4995.84534699	1884.26114352	4329.30290162	1526.49004032
RP1-43E13	17073.7265784	19316.0819259	19302.0232723	31069.7401865	44514.5330131	11651.2287885	16683.2153399	12049.9502147	12143.9913049	43899.5133955	19089.0116274	23958.1331623	17140.7542172	14580.0943547	38220.9621634	13151.5512082	31120.8969042	5761.0866876	27758.3726191	35395.6654689	5184.80592623	14776.481096	16911.0024673	34653.9371204	38511.8927613	4473.80002897	45757.4422071	36086.032901	12269.9010126	18741.7957789	6833.40555863	12214.4957055	41215.4898759	18887.4228651	7945.1624885	18402.0996796	19199.0907311	41297.1247326	14794.4404958	10942.5053413	24831.9189486	24880.464006	15380.6603577	14543.4787478	16036.9671337	9060.11294337	28204.7391742	15025.7992974	15364.2577431
RP5-1056L3	0	0	0	5309.18715017	0	2038.36197232	5272.48881244	1553.34979884	0	6057.57727197	0	0	0	6301.88221467	1509.89775727	0	3908.90492517	0	0	0	0	0	1380.65672318	0	0	0	0	2325.91135021	0	0	0	0	0	0	0	5200.59338771	0	0	0	2821.17986679	0	1194.88446065	0	0	1571.15793947	0	0	0	6271.88299175
RP11-91K11	0	2434.31606673	0	0	2969.97871268	943.939436846	0	1438.67296805	3443.51431297	0	0	754.833054517	0	1945.54752936	0	0	905.082012875	0	0	0	0	0	0	2312.08660614	0	2537.15504999	28225.979009	0	0	0	0	0	0	1020.12606718	0	0	1451.74332597	0	0	653.226210767	0	4426.68605555	11630.1190177	0	727.58320687	10276.2354861	66187.4693883	0	5808.8580729
RP3-340N1	0	0	0	0	0	0	0	0	0	0	0	0	0	0	0	0	0	0	0	0	0	0	0	0	0	0	0	0	0	791.840871658	0	0	0	0	0	0	0	0	0	0	0	0	0	0	0	0	0	0	0
RP4-745E8	0	0	1378.52173532	0	0	0	0	0	0	0	0	1473.4077527	0	0	0	0	0	0	0	0	0	0	0	3008.7415224	0	0	0	4204.92270301	0	0	0	6760.64336536	1425.78147974	0	0	0	0	0	0	0	1409.67225472	0	0	0	0	6017.65580212	0	0	0
RP4-749H3	0	0	0	0	0	0	0	0	0	0	0	0	0	0	0	0	0	0	0	0	0	0	0	0	0	0	0	0	0	0	0	0	0	0	0	0	0	0	0	0	0	0	0	0	0	0	2622.85450501	0	0
RP5-930J4	0	0	0	0	0	0	0	0	0	0	0	0	0	0	0	0	0	0	0	0	0	0	0	0	0	0	0	0	0	0	0	0	0	0	0	0	0	0	0	0	0	827.227703525	0	0	0	0	0	0	0
RP3-329E20	2082.23690546	1505.03358482	0	1013.3718212	0	0	1886.93842354	0	0	867.163551382	405.638496797	933.362034216	0	0	1729.17751455	0	0	0	0	0	302.984855302	0	1185.87527675	476.488111086	0	2352.92179947	1125.86557953	1331.84965282	1434.03407408	0	1064.86449	0	451.596070346	0	11143.0079714	496.322190528	1346.32627948	5036.41643861	0	403.861848151	1785.97480682	684.207699458	513.600395267	407.941561555	899.667201856	0	0	3512.25460755	0
RP5-1071N3	4402.80972134	9656.74231554	1910.13398985	2068.84824004	5712.32694717	1361.64882056	2641.56155912	3502.08633551	1448.80412603	1896.81095497	2484.39261673	2858.25650777	7431.85488616	9647.29447546	6303.9297248	4105.37477789	1631.99540038	2892.05748896	5046.2982091	1055.69464123	1502.21333462	1231.20785072	2421.02249925	3057.28918714	2205.38454877	2058.68793185	3447.76464179	7962.89214573	3345.88668193	1073.24942669	776.418945414	1040.86817982	4478.06962536	1287.60567334	4178.38718781	1302.77067114	2225.04992619	2570.52275069	7228.12956052	1766.7937649	7813.1895038	4589.62881577	3594.99558639	951.808790656	787.163437203	370.591146615	1193.45699139	3073.04568123	4887.97012508
RP11-293F5	0	0	3318.59634575	0	0	0	0	0	0	0	0	0	0	0	0	0	0	0	0	0	0	0	0	0	0	0	0	0	0	0	0	0	0	0	0	0	0	0	0	0	0	0	0	0	0	0	0	0	0
RP11-63N8	458.421827847	0	0	0	0	0	332.340190065	0	0	381.826582003	357.218798032	0	0	0	0	0	492.779122723	0	0	1821.51871628	0	0	696.214230688	0	1902.60946455	0	495.737401949	586.435626668	0	0	0	0	0	0	700.92176469	0	0	0	0	0	0	0	0	0	0	0	0	0	0
RP1-224A6	771.238362013	1114.89680515	0	750.684248693	1813.63454176	3458.53219893	559.121508286	2635.60170787	2102.80177308	3211.88139164	1802.93012203	2765.6588145	0	0	0	2157.41041713	1658.08057277	0	0	0	448.889447507	0	1171.29484302	705.944476055	0	1742.99432481	1668.03445492	1973.21167826	0	0	0	1057.50500729	1338.13097894	934.418754158	0	4411.97881662	0	2798.15247319	0	598.344500436	4630.54226296	4561.61834054	1521.85690893	2417.55531971	666.4542899	3765.14529696	1010.44394865	0	0
RP11-415K20	0	1105.83260348	0	0	6296.11340919	1715.20702549	1109.15160993	1960.63053878	1042.85291185	1274.30741392	1192.18143571	685.793445872	2826.13410995	5302.80332698	635.261861292	713.290165013	2466.90036436	539.702688583	1589.14802596	1519.78340047	1335.71981941	1691.88706315	1742.65818108	0	3174.88286667	1728.82363924	0	978.584653444	0	0	4694.49406264	1048.9074056	0	1853.64370744	0	2917.40604676	659.480962104	2775.40326609	5928.80186537	1780.43973301	1968.3838191	1005.45155835	754.742044264	4196.32569722	1983.10788702	6535.43512927	1002.2289572	3096.7805869	879.593346404
RP11-69E9	0	0	0	0	0	0	0	0	0	0	0	0	0	0	0	0	842.85762449	0	0	0	0	0	0	0	0	0	0	0	1080.00691204	0	0	0	0	0	0	0	0	0	0	0	0	0	0	0	0	0	0	0	0
RP1-184J9	0	0	0	0	0	0	409.686630696	0	0	0	0	506.622185239	0	0	469.29254618	0	0	398.699283458	1173.96520837	0	0	0	0	0	0	0	0	0	0	0	0	0	490.246184475	0	0	1077.60043169	0	0	0	0	484.707126625	0	0	442.855478986	0	0	0	0	0
RP5-1057J7	1636.36661158	0	1372.52816256	796.378072526	962.014843889	0	0	0	0	1362.95488619	637.557898227	0	755.683685923	2835.8469966	679.453990773	0	879.503608164	1154.49444688	0	812.753731556	1428.63945902	1809.5835545	0	748.91500938	4244.68035435	616.363210513	884.783493479	1046.6601076	0	826.268735644	2510.53378132	3365.62463188	709.791214914	991.296417455	1250.99297567	780.089008156	1410.7157972	5936.9495953	2717.67439543	1269.53094006	0	537.698007291	0	1282.35543045	0	1997.16402708	0	0	940.782448763
RP1-150O5	825.36035233	2386.27035489	692.283941643	803.363845092	8734.08213531	925.309053224	5385.22294823	1410.27810684	4500.73361958	2062.36594621	3215.75255684	3699.67516852	3049.24996074	953.574282483	2056.2423405	2308.80763938	5323.31131257	3493.86477346	0	819.883150253	2882.3427682	4867.88558522	0	2266.45331786	7707.44590658	2487.07962137	892.544752194	0	6821.0962866	4167.58353504	844.185335825	0	3580.08726821	3999.96800026	17667.5323758	35411.9352387	4269.27149151	998.171350087	6396.86517053	7684.00305823	37520.158236	5966.56122126	814.326942495	1293.6041623	713.223011998	4029.36601955	0	3341.26326482	949.034926383
MDS2	351.413931524	2286.0068946	2358.03157714	1710.2423593	206.595157885	393.9691207	636.907787217	2101.59090431	239.534842499	1170.79224584	0	630.084734583	6491.40047665	16443.1464509	729.572445741	1310.69565336	755.502632596	1983.44517485	0	174.540950754	511.339986889	0	400.274428148	804.157106244	1276.17840719	264.731164179	380.019054155	4945.0048034	484.03671128	1242.10332809	359.429050547	722.776531591	1676.72434522	425.766901988	0	502.578352593	0	212.495861643	3501.76532745	1090.54011657	602.829031432	346.416083129	693.432466439	963.861924852	455.503772368	0	920.815400453	1659.71247141	0
RP5-886K2	331.890935328	959.558449584	1391.89363928	1938.27467387	1170.70589468	1488.32778931	2406.09608504	283.547979154	904.909404995	1658.62234828	1034.4854786	1785.24008132	919.615067525	1533.79143849	826.84877184	1237.87922817	356.765132059	234.156722031	689.471630311	329.688462536	1159.03730362	978.728318721	1764.17247961	2430.34147665	0	0	717.81376896	849.142238967	457.145782876	670.341478653	0	0	863.767086933	804.226370422	3044.74480852	316.438222003	2002.86810713	2809.66750395	734.938402057	772.465915907	1423.34632422	1090.56915059	0	260.089725754	0	810.137083296	1304.48848398	0	381.62251008
RP11-4M23	0	0	962.443528626	0	0	0	0	0	0	955.73056044	0	0	1059.80029123	0	0	0	0	0	0	0	0	0	0	0	0	0	0	0	0	0	0	0	0	0	0	0	989.221443155	0	0	0	984.191909549	0	0	0	0	0	0	0	0
RP11-293P20	0	0	695.333650637	4034.51446434	0	5576.31182736	0	0	1130.14015998	2761.93501167	0	743.194659403	0	0	2065.3006768	1545.9857321	4455.63501933	0	1722.1604158	0	1930.02687562	0	0	2276.43769371	1720.31098062	7494.10775778	896.476667402	0	0	3348.7543471	7631.13792561	0	0	2008.79450233	5070.10368996	4742.39132711	1429.3596183	1002.5685807	917.863599044	3858.92664598	2844.18454918	1634.41244507	1635.82857171	649.651429525	716.364963593	1011.77913266	0	2237.3216575	1906.43139397
RP11-10N16	0	1177.00300901	0	0	0	0	0	173.901248437	0	169.540088602	0	182.482625943	188.001349662	0	676.146751229	0	437.611313959	0	0	0	118.473796854	450.193853473	154.567842995	0	844.803877988	153.340766271	220.119203353	260.391373442	0	0	0	0	176.584077264	246.617821541	0	0	0	246.168813218	225.370510528	0	0	267.540382211	0	0	175.89491264	0	0	0	0
RP4-594I10	0	376.518782639	3495.43504376	760.55483743	3981.210219	292.000642401	0	222.521389869	0	0	0	467.00397975	0	601.840654411	1081.48386075	0	279.980387374	183.760361787	0	3104.77550048	0	0	0	238.408930322	0	0	1126.64472526	1665.9641851	0	0	1065.60142045	357.136639139	451.908593579	0	0	496.665666092	0	1259.97546198	0	404.141337319	0	855.851499495	513.955828066	0	107359.559713	0	682.486708571	351.468523358	898.463515081
RP11-84D1	1835.92351543	3317.49781045	3079.8192916	2233.74337416	25364.3425913	514.562107646	1996.47289788	3529.13496981	0	16820.8578638	1788.27215356	411.476067523	2119.60058247	3181.68199619	3049.2569342	427.974099008	2960.28043723	2590.5729052	953.488815576	0	1602.86378329	1691.88706315	1742.65818108	3781.10748638	1428.69729	345.764727849	2978.05175854	2935.75396033	4425.39417618	4635.166078	0	6293.44443361	2389.05335752	1112.18622446	0	875.221814028	1187.06573179	1665.24195966	15245.490511	2136.52767961	393.67676382	4826.16748008	452.845226558	2158.11035857	13088.5120543	1120.36030788	601.33737432	1238.71223476	7916.34011764
RP4-799D16	0	1260.87981672	731.590909361	0	4102.21856954	0	316.166044083	372.587958702	0	363.244060052	339.83387391	390.973783742	0	503.858485298	362.165510725	0	0	1230.74726666	0	0	0	0	331.165633485	0	452.503583546	0	471.611132098	557.895306483	0	0	0	0	378.33598941	0	0	0	0	527.423100393	1448.58658389	0	0	0	0	0	753.71887247	0	0	0	0
RP4-706G24	0	0	0	0	0	1004.62125779	0	0	0	0	0	803.358036593	0	0	744.163894656	0	1926.53171312	0	0	0	0	1321.28323027	0	0	929.787125238	0	0	1146.34202261	0	0	0	0	0	0	0	0	0	0	0	0	0	588.907341319	0	0	0	0	0	0	0
RP3-465N24	0	64008.1930487	11691.90657	798.113101007	0	11031.1353796	16050.0762379	7005.30301438	3353.48779498	5463.69714727	8306.30987232	26463.5588525	31050.53228	6631.39239583	6809.34282692	12997.7318958	7051.35790423	5206.54358398	0	1629.04887371	3340.75458101	15112.7166861	9962.38576724	12759.2927524	5955.49923355	2470.82419901	21281.0670327	0	0	0	4193.33892305	3372.95714742	0	0	0	11726.8282272	6362.05163441	19832.9470867	23604.4922072	19084.4520401	14769.3112701	0	10517.0590743	2570.29846627	0	15011.3636022	3222.85390159	8851.79984753	1885.66416745
RP11-70P17	9350.66635186	3379.31453984	7189.43323247	2275.3659215	3664.81845291	873.583702422	8473.64273428	10651.5414778	15934.2743053	35696.4374955	6071.97998311	4890.00544013	2878.79499399	16204.8399806	647.099038831	2179.7438583	6700.97987172	4947.83334378	42087.7464764	20899.3816686	6349.50870676	3446.8258181	4141.97016953	7845.77628874	27489.3584853	2348.05032576	9269.16040788	3987.27660037	7513.09156205	3934.61302687	16736.8918755	3205.35679227	8111.89959902	16049.5610445	14297.0625791	4457.65147518	4702.38599065	4711.86475817	15529.5679739	9068.07814326	13367.0785231	14850.706868	6919.25004555	6106.45443074	6060.18062368	11412.365869	6125.42418562	8411.95886132	9855.81612989
RP1-187B23	507.685684347	489.271259815	425.829331011	329.436972448	198.977890373	569.164921228	490.739741086	1156.63096532	0	845.718409598	263.737979482	1061.99308794	0	1564.13623314	1124.27638761	473.388616708	545.735152548	596.973297623	0	1344.84430401	984.973248127	124.761456096	771.03221681	154.901485753	2809.42872374	127.485196419	1098.02268076	432.970907819	466.190033976	170.900907552	865.441801116	464.084931255	440.42800206	615.102992845	0	484.048035636	291.784742226	204.661032212	187.369637575	525.165676642	435.451816095	889.716127172	0	795.706157386	292.472745927	0	443.432236459	1598.51803676	0
RP1-317E23	0	0	0	0	0	0	0	0	0	0	0	0	0	0	0	0	0	0	0	944.107869989	0	0	0	0	0	0	0	0	0	0	0	0	0	0	0	0	0	0	0	0	0	0	0	744.802396476	0	0	0	0	0
RP1-125I3	443.303086764	1281.67171004	1859.1370871	0	2606.16506589	993.971562474	964.138855278	1136.19578926	0	0	690.875460976	794.841873661	1637.75969623	512.167105786	0	0	953.054557727	312.760568649	0	0	0	326.819173566	336.626550881	405.77256103	459.965362308	2003.72492463	0	2835.47496758	0	895.367770073	0	0	769.149490837	0	0	1267.98920054	382.172713021	536.120301107	981.649173065	0	760.459237531	1456.66126828	0	347.39899765	1149.2215317	0	1161.59398573	1196.40050943	509.729006397
RP11-96L14	875.265862006	421.759411561	734.142970673	1987.8584446	1715.2202643	1308.34396363	2326.63895851	1744.80919265	7954.78500205	1944.05968263	682.038681824	1830.90901363	2155.74880945	1011.23226235	2907.43103028	2176.36441046	3136.21441671	1029.2004759	6060.93665715	3767.64908116	169.812442158	4947.13023428	1993.92517463	1335.27482293	9081.64168837	1978.0958849	1577.52095737	3732.27635267	2813.04125928	7955.23852457	1790.45820063	800.096811714	4049.66150525	1060.45663263	892.181036915	12517.7073402	3018.27565912	3881.26162173	4522.43491126	2263.50477684	1501.46486666	1917.37273918	1727.13063153	1829.09611786	504.232082901	7833.8371915	3440.20916472	5118.09008626	3690.20092305
RP3-476K8	4980.24620914	6170.92220318	2983.75687514	6232.52404586	5019.20788116	797.619902212	13410.4606751	9725.3204797	9699.12349021	7703.6580524	8315.97258556	4464.78757577	7885.39498354	4931.90782018	2363.31822878	3317.0015235	3823.92873115	6023.44928808	8867.98671576	4240.45425159	7039.67269663	4196.13577856	3781.79885044	3907.38265764	5905.64223213	6967.58411884	23081.3085255	7281.11379198	6859.7792523	2873.97821093	5093.83665776	3902.17348624	9258.14628149	861.996884743	13053.8397462	12888.4270913	6133.54694433	4302.1373879	3150.92683528	4415.7597915	17086.6134164	18234.9758994	8423.43483806	10593.3709472	3688.80559702	12156.6505996	12117.6869759	9600.60522215	13907.2188078
RP5-968P14	9220.92585623	4896.62676823	11838.0554021	18683.0295815	48899.2145149	11814.3459916	19918.1446112	7073.95498392	7952.7963058	19749.2163009	6892.00087983	5904.68156896	5909.44642392	28481.3566692	8751.36740116	3509.38761186	10923.4348134	21773.7652682	5473.02580141	12337.601645	12048.1927711	16925.6381798	3715.34724207	9990.52622513	32607.6344821	16586.3339949	17908.017908	24313.9142995	4665.62986003	28696.3131889	17707.6316043	13675.6547542	10284.8747041	8891.92886457	15537.3327579	30322.059747	6327.06035042	7737.82430587	12918.0122929	10073.7280093	40836.090711	9522.63170913	5384.32974378	13124.9078307	8618.58687698	14928.8011024	4191.32149901	12950.7364144	9737.09834469
RP1-50O24	0	0	0	0	0	0	0	0	0	0	0	0	0	0	0	0	0	0	0	0	0	0	0	0	0	0	0	0	0	0	0	0	0	0	0	0	0	0	0	0	0	0	0	0	0	0	0	0	0
RP11-40H20	714.163796323	1032.39021046	1797.04825838	695.130765393	1679.4187028	800.646922714	1035.48878954	1830.4178844	0	0	556.502150255	1280.49478318	659.610048434	3300.41649193	593.071794603	1331.83590583	2303.06447679	0	0	709.424509517	415.669924826	1579.5226472	0	653.701905721	741.006817077	538.002043332	0	0	1967.37502004	0	1460.90517319	979.245623445	0	865.268220169	0	0	0	863.692857001	1581.44240594	1108.12947329	0	938.675838155	704.616861059	0	617.134143209	1743.255128	935.667261751	963.704015658	2463.52899296
RP4-752I6	0	0	0	0	0	0	637.503028139	751.269645701	0	0	0	0	812.183400758	0	730.254289149	0	0	0	0	0	0	0	0	0	912.407926635	662.446441205	0	1124.91506891	0	0	0	0	762.859716964	0	0	838.413419981	0	0	0	0	2262.72158644	577.899727462	0	0	0	0	0	1186.6168604	0
RP1-159A19	3989.72778087	3845.01513013	0	1294.46612495	0	10436.701406	0	7953.37052481	14504.1309578	11077.0185097	5181.56595732	3576.78843147	11054.8779495	16901.5144909	0	3720.19888183	8577.49101955	9382.81705946	19339.3137859	30384.9274907	774.056715136	3921.83008279	1009.87965264	0	6899.48043463	2003.72492463	28763.2796467	17012.8498055	0	26861.0331022	13602.4209589	3647.08440675	12690.9665988	0	16267.3291536	6339.94600268	16051.2539469	8041.8045166	5889.89503839	0	13688.2662756	1747.99352194	5248.52418061	15632.9548942	0	4869.41052539	3484.78195719	7178.40305656	10704.3091343
RP11-288L9	3413.73533481	0	6442.47913039	0	2006.92439088	0	0	21144.577874	38394.0133262	1421.67629852	1995.07913731	1530.20578399	1576.4829729	5916.05269132	4961.09263104	0	917.396053867	602.117285222	24820.9786912	7629.93299011	2980.38163787	629.182490606	0	0	33649.4388181	9000.85958209	7383.22733788	1091.75430724	1175.5177274	5171.20569246	1745.79824552	4680.8384903	0	3102.0160002	6524.45316111	3254.7931406	0	0	6614.44561851	7283.25006427	4392.04008615	0	1684.05027564	0	0	0	0	24184.3817263	981.31502592
RP3-426I6	2045.45826447	2956.90022236	6862.64081281	5972.83554395	7215.11132917	0	4448.66243549	5242.55557109	0	1703.69360774	1593.89474557	1833.75204005	1889.20921481	2363.2058305	0	1907.27587601	0	1443.1180586	12747.7309039	0	0	0	3106.47762715	0	4244.68035435	4622.72407885	4423.9174674	2616.65026899	2817.40933577	2065.67183911	0	5609.37438647	7097.91214914	0	9382.44731756	0	3526.78949299	0	2264.72866286	1586.91367507	1754.42905615	16130.9402187	2018.11459662	0	8837.76340954	0	0	0	4703.91224381
RP11-460I13	17433.769622	4447.43575679	12902.5126998	2994.5551501	10852.1565496	3449.10840548	743.464021917	3504.5603091	6990.2402266	7687.51121095	3995.59445755	3677.49727923	2841.53538576	3554.46762517	4258.15852528	1912.472813	3307.1252841	2894.10052079	2130.41097758	3056.13119767	1193.77684133	5292.33337466	1557.47107192	2816.0836865	2128.12312044	5407.87340014	8871.94347685	0	2825.08620044	1035.65018637	3146.71809103	2812.32939267	2668.96969096	4969.98748806	0	1955.53647821	5304.59891044	2480.46940403	0	3978.09422633	7036.83806718	6739.53905597	2023.61354647	3214.62396735	6203.29115612	6258.14340911	4030.76278155	6919.23727864	3537.54708254
RP5-1092A3	2656.68932232	1280.16386097	4456.67968079	861.962149087	2082.47919148	0	6420.03049514	0	1207.25560619	3687.99557441	5520.50133053	793.906765574	5725.4152204	2046.258225	735.409025307	1651.47652323	4759.66658536	1249.57046015	0	1759.3727836	1030.86141357	3917.21616505	0	5674.13254166	918.848453176	2668.49013493	4788.24008236	6797.13387522	0	5365.88637736	0	1214.26457307	3841.22304542	0	0	10976.3112206	11451.6929419	2141.95828536	980.494291685	0	0	1745.93705897	1747.44981543	693.980585893	2295.73901274	0	2320.45480914	1194.99297942	6109.55190255
SNHG3	152736.890406	171685.380817	154211.328363	96512.1391123	215526.153357	102698.440222	103453.891602	71655.0990744	122497.462194	87341.8032133	149149.246671	96815.6483141	107736.684401	193907.744163	136472.522462	34939.3531807	116779.49083	152188.236908	346367.407267	71609.0115048	37617.1113917	85453.5404237	37192.6225497	46180.6495999	170991.673374	63738.1075372	89902.4871628	119659.263182	102716.90005	326343.811294	24388.8612775	71577.1539863	117726.720979	55214.8224693	28998.0661387	146854.427323	322718.49296	153429.289362	106216.217484	40284.6266008	51170.2752503	59778.1287558	72213.748335	43144.610055	47018.2849416	84161.3128536	26777.753332	121998.610558	49437.1050986
RP4-669K10	9937.60808278	1044.7808755	6365.15700929	5451.92093818	19332.6650817	5874.35761874	6811.45818256	5711.52477644	26109.872808	11889.0495834	11404.4202054	7613.19617971	3337.63317834	9602.5800045	33610.628521	3369.55123558	8545.92080136	6883.73549221	37535.3254331	7358.87440093	4416.91700245	10656.5330142	3292.89611173	4134.67239936	7499.00321843	19600.5276353	2344.69749592	4853.93021574	10452.6833158	14232.60789	3141.6825364	2972.99535414	7210.36106941	3940.43895176	4972.74212126	5340.40770826	26947.8548106	5025.83827158	5201.37394293	4766.07390842	12088.1256908	5937.13594225	6595.93095237	3115.08328281	2654.29898656	6836.18795636	946.897065661	9752.70314454	4570.67613129
SNHG12	64974.9478668	142904.877551	77962.2008122	23214.526935	102081.255303	41981.6854897	85563.9687623	68555.3017528	55000.3775578	36388.5142254	74686.972028	48758.1472254	90480.6460071	89360.9510606	75430.0566008	40528.9063851	131183.289142	86257.1791213	347287.901439	58454.730921	31266.2067767	49545.1866892	22680.8742597	35806.8751598	96673.6320443	44497.8829502	61706.9020978	108354.271133	54342.5450088	80811.3822945	31119.616253	75491.5152847	148700.944249	27681.1525514	16870.068141	85326.9996543	234436.987085	66718.1632045	85637.190208	38995.6897874	81540.1685582	67456.6590965	52120.7825463	24804.1032625	49213.0214284	64338.6066053	29787.3011479	95047.4131688	35369.1855774
RP11-442N24__B	6542.12009331	7232.0095418	8392.35011464	6742.34196372	20814.1452931	5608.62174592	5300.79204993	8219.41227914	10492.5078248	7692.75150489	4198.23401286	6900.00767626	3198.90640053	8447.61511598	16618.1385064	1794.16544574	8687.12152849	10045.7543384	3197.79480071	8792.36654382	2015.87162929	5390.51133823	2045.57422483	4931.50578774	7187.31152024	3768.76482502	13316.9867321	9353.58828261	4770.58267897	8161.30468949	3542.47097978	5276.7121018	9681.61023206	7460.06301888	4118.8112287	7705.17363884	5639.9782894	5119.45551333	2130.41960105	2687.04401423	4621.07285138	5311.00485729	4176.54799955	3015.76430475	5653.27688038	9393.61403331	17646.6080194	3635.07578094	9734.88587063
RNU11	0	6090.3318013	2355.831920815	0	3302.439016335	0	1018.10185091	1199.788837165	0	2339.400177795	0	1258.993937945	1297.06901315	8112.4976271	2332.453998175	1309.4729895	0	0	17504.3469128	4185.075184875	1634.761570025	0	0	0	1457.129076865	0	4555.97470523	1796.50615483	0	1418.2224567	2872.750098035	0	2436.596707915	1701.47892548	0	0	1210.68893043	0	1554.888335695	2179.04564338	1204.533381835	922.914490125	2771.14243118	0	2427.08726471	10283.90431855	1839.912861725	0	0
RP1-212P9	1387.51823286	1002.89334731	290.950670405	0	0	388.885648175	0	889.060115281	0	577.842624561	0	621.954608975	0	2003.82429867	2016.44410165	323.445862844	0	734.194625206	0	0	0	511.464476235	1317.03198939	635.024708415	1079.7527906	0	375.115582489	443.745299073	477.791076296	0	354.791256347	475.633588531	601.850615411	420.273135511	0	661.457960833	0	839.01591823	1920.3229215	0	5950.50592317	0	684.484950743	543.671426737	899.252608676	846.723919316	454.466955708	0	0
RP11-242O24	0	0	0	0	11102.8236463	3024.66615247	0	0	0	1123.58288109	0	0	0	0	0	0	1450.07763353	951.733773415	0	0	785.154302449	0	0	0	0	1016.22608185	0	0	1858.07640782	0	0	0	0	1634.39552699	0	1286.16825717	0	0	0	0	3471.12845518	3546.10872192	0	1057.13888532	1165.69782606	1646.40762089	0	0	6204.44338969
RP11-467D18	5254.65020122	6646.57501989	2203.71013884	1278.65240266	5406.08690632	2209.1148077	5237.9829956	561.157780733	895.433913843	5470.84858332	5630.0924346	2355.39529053	606.657060252	3794.32698789	8181.90669517	612.458571006	1412.11748606	463.409638364	0	652.472454652	1911.50131225	1452.71978198	1496.31383088	4208.5625309	6815.19358813	5937.73982902	1420.59478883	1680.5013944	904.717832079	1989.96658846	0	3602.53014699	3988.70455851	6366.44121507	0	4383.74625875	1132.51180927	2383.06877298	1454.48542397	2547.92422524	3943.63808783	6906.55730133	1944.15228156	514.732546256	1135.18217616	0	8605.52612466	3545.35438919	1510.50585142
RP3-437I16	175.216164182	0	0	0	618.054229314	0	254.051486074	0	0	0	0	0	0	0	727.534533882	0	0	0	0	0	0	129.175734803	133.052114384	0	0	263.991691653	0	0	0	0	0	0	0	0	0	0	151.054298582	0	0	0	601.145151456	0	0	0	0	0	0	0	0
RP4-656G21	0	0	0	0	0	0	0	0	0	0	0	0	0	0	0	0	812.392891075	0	0	0	0	557.167627224	0	0	0	0	0	0	0	0	0	0	0	0	0	0	0	0	0	0	0	0	0	0	0	0	0	0	0
RP11-179G8	0	0	0	0	0	0	0	0	0	0	0	0	0	0	0	0	0	0	0	0	0	0	0	0	0	0	0	0	0	0	0	0	0	0	0	0	0	0	0	0	0	0	0	0	0	0	0	0	0
RP11-111I12	0	358.176195467	0	241.167816565	291.32773416	555.550925965	359.251212697	0	0	206.372365915	1544.57739663	0	0	286.260614096	0	0	266.340789832	0	0	0	2884.24029471	365.331768739	564.442281167	680.383616158	0	373.307540271	0	316.960927909	341.279340211	0	760.266977886	0	214.946648361	900.58529038	0	472.469972023	427.208207182	0	0	192.226541286	1912.66261816	0	244.45891098	194.168366692	0	0	0	1671.73145573	0
RP5-893G23	0	0	0	0	0	765.773009565	0	0	0	0	0	0	0	0	0	0	0	0	0	0	0	0	518.685919596	625.228501479	0	0	0	0	0	0	0	0	592.566168531	0	0	0	0	0	0	0	0	0	0	0	0	0	0	0	0
RP4-591L5	0	0	0	0	0	0	0	0	0	0	0	0	0	0	0	0	0	0	0	0	0	0	594.17035696	0	0	1178.90676439	0	0	0	0	0	0	0	0	0	0	0	0	0	0	0	0	0	0	0	0	0	0	0
RP5-1125N11	1695.33477776	0	0	2475.22914434	0	950.317406014	614.529946044	0	0	0	660.532957622	0	1565.83106092	0	0	0	911.197431881	20931.7123815	0	842.042154314	986.7479747	8124.1063483	643.684553373	0	0	0	0	0	1167.57504005	1712.08837115	0	0	0	0	0	0	0	1025.14895414	0	0	727.060689937	0	0	1992.84965544	0	0	0	11438.5589246	0
RP1-65J11	9366.53286716	4513.39822779	1904.56396615	4144.04879369	333.73063966	2545.64662606	4938.48499627	4364.84264742	4643.29079305	21749.7174901	1327.04358907	3307.94485656	7340.27592359	9181.92793269	8014.07271168	8469.11037553	4881.70931831	5006.29190767	5306.7477066	2819.50766603	4130.05374026	3557.30100458	6250.43914723	1299.02301778	1472.51354676	1069.10662457	2455.50773454	5446.42137437	7428.10183849	573.278459119	1451.54039644	8172.93462645	4185.94819052	1031.66595482	8245.6098095	2976.81024228	2691.63722994	6178.72582316	628.521981849	2642.46259016	1217.25092885	5036.35690087	2800.40034523	5115.88252421	245.271262045	15588.7237408	13759.1070414	8426.23254717	14033.6929386
RP11-266K22	4286.60957474	0	719.09220362	0	0	961.141066674	0	732.445121549	0	1428.15318371	668.056112037	768.588554371	1583.66512767	0	3559.78172842	799.404922975	0	604.860416362	0	0	0	1264.09785129	0	3923.70050473	0	1291.69511087	927.107988611	2193.45626193	0	865.794119353	0	1175.5408737	743.744781003	2077.4321277	0	817.405338842	739.099392608	2073.64982068	0	665.130105268	5147.39094379	0	845.86124323	0	1481.68425272	7324.45121549	0	0	985.78570941
RP11-73M7	5095.18484651	7856.60131284	2564.19972609	3306.26275597	2995.4433316	3236.91145334	6772.03126462	2902.01632094	3936.11090016	2263.39078574	2646.90102152	4263.30799203	3921.64367695	3728.23446906	2961.87976122	2533.85387138	11866.9485037	2636.16511788	1411.30113497	506.1372516	3657.55770044	2253.81345236	2837.32433093	3420.13533165	3172.01744892	1279.45431785	5509.93330777	13687.8203602	3041.17469818	1200.62514836	1563.41905155	4424.72311713	12376.5038557	3498.16696051	2337.14391665	7772.7280235	4978.24798469	9242.99463167	3008.73699614	1581.18474483	291.349229542	8929.28098751	7205.47052728	1464.06102845	6897.92219907	12851.7865642	1780.13229943	7792.26017715	4686.93061116
RP11-84A19	5770.49213963	4634.32402823	1613.36359824	11857.4861225	753.878753303	5031.66353985	15339.169965	2191.09647946	0	4806.33154075	18985.540138	5748.04728056	5329.69413922	9629.96311169	3727.15817766	1793.55414576	15852.0411829	6785.35918525	0	5732.19837928	3358.64131763	6617.67069336	10224.3863299	16432.7518242	1995.79519216	14490.3105708	37441.2640171	2460.63193949	6181.98164305	2590.0076211	4590.52741389	4395.76187015	6118.47282362	3107.3005249	2941.00563276	4279.19353707	4974.75587767	4652.46475952	1419.79582271	4476.8808278	2749.7014168	3792.28236829	6325.94694681	4019.64904947	2770.26996142	782.534456948	2520.08507807	12112.7908476	2948.96031639
RP4-534N18	15287.5255975	1052.35907333	3663.61482463	2125.72870423	0	816.13332354	14249.4874143	621.94082855	0	3031.71783196	10210.791871	3263.1564349	2017.10538989	8410.63583776	3627.25921573	3393.99188768	7825.37059488	2054.41951863	1512.30334385	0	4237.09962057	5903.6059225	6080.76471697	13326.9208632	1510.67927505	14258.6150827	25191.5145532	5587.58587421	1002.71434774	2940.68563556	3722.9063166	2994.55963379	1894.60711138	882.004549379	8904.55348256	7634.91369684	4393.13816922	4401.99357485	806.015616956	2259.12662447	7492.80339649	6219.4082855	5027.72069719	3993.40859387	1887.2129215	1776.97379586	3815.0610982	8841.09892895	1674.11963803
RP11-277A4	3618.88769868	5231.43885494	2529.49901754	4109.51505374	2127.53282783	2028.56215514	3935.3552314	3091.76354192	822.249411269	4521.34072824	939.989208924	4866.49579859	3342.44707235	4181.05646935	7513.1931672	562.401860875	4538.46413187	1276.60443646	1252.98209739	2396.58151613	351.054567922	1778.65050229	3664.05053458	6072.93260811	0	1817.48126177	3913.46545193	4629.45816822	6646.19638181	3654.65017689	616.904668488	1654.04629345	3662.7046667	1461.52676932	5533.23816164	5750.65614987	1039.95074793	2917.73163871	4006.82763429	935.872167349	8277.30631621	3567.41947145	595.085073362	2363.31529651	2084.80572738	1472.2683533	790.218985485	4883.38477165	5548.20418501
RP4-622L5	0	0	0	0	0	0	0	0	0	0	0	0	0	0	0	0	0	0	0	0	0	0	0	0	0	0	0	0	0	0	0	0	0	0	0	0	0	0	0	0	0	0	0	0	0	0	0	0	0
RP4-811H24	2191.3497564	1583.89997355	2297.53622554	533.237137354	3864.86312829	0	794.326917158	1404.11968716	0	2281.51109043	426.894662568	0	3541.92353518	632.940135098	4094.52623261	510.827891101	4711.16925479	1546.04787646	0	1632.60574898	956.585372853	2019.42851788	1248.01721265	1002.9138408	0	1650.81267444	1184.86290248	2102.4613515	0	553.251264041	0	0	950.520986493	0	0	4178.642722	944.584085458	1987.62504646	1213.12976409	425.024914429	1409.67225472	1440.12275606	1621.54185929	1287.95523583	473.405667352	0	0	2957.04230714	0
RP11-114B7	0	0	0	0	1120.32108402	0	0	1628.06789043	1298.9459054	793.619300821	0	0	0	0	0	0	0	672.237272868	0	946.498016495	0	702.454375588	0	0	3954.53764658	0	0	0	0	1924.4740172	0	0	0	0	0	0	0	1152.31933073	0	0	1634.50605738	1252.35991572	0	0	823.366312585	2325.81127204	1248.34594163	0	0
RP1-117O3	0	323.850976735	939.528206516	218.055900811	263.408826303	0	487.234457221	0	0	373.190028362	0	401.679018296	413.826780386	0	1302.28681565	0	0	158.055787371	0	0	260.783393314	330.320807568	0	410.120124184	0	0	242.262147024	573.171011303	925.720210324	226.240249045	0	307.180025926	194.34759456	542.852800035	0	427.191599704	193.13371033	541.86444719	0	0	384.303507538	0	0	175.560564884	193.589103257	0	587.019817789	0	0
RP11-131M11	10239.3234298	6800.87051143	7195.68073461	5656.62660338	6833.13484704	7756.26706379	11435.6793195	16313.5993947	11695.288685	20744.975106	10997.8737444	8931.45111271	12779.9446884	14707.4809922	27577.838449	28384.752743	13386.5622713	6833.58845397	8048.56735501	20617.6498078	4671.09078023	12037.2788405	6724.61039289	15451.8787965	14357.0070809	11257.6927567	6284.56510809	11682.573848	8767.11493306	6148.41147405	11322.0150922	20111.2569915	10563.3633749	14417.5317186	11001.3794037	8179.46268846	9304.50051533	12717.8773193	3983.25805997	6226.30247807	11156.1047629	13640.1332732	13651.951683	11060.3155877	5500.20805135	7768.38066416	5801.13702286	7095.27081528	10818.9981608
RP11-415J8	8061.60188716	11111.7585442	6054.1653198	6295.65131307	19177.999528	6725.83297865	14814.8399844	10010.6914184	3833.75067969	11243.1048146	8400.20244488	6554.92136458	15411.0535998	2707.53345462	25299.718959	11712.5265253	11587.9802919	4034.26079446	5063.10872929	3910.93451897	7420.14815744	9260.50064754	6975.84116721	10639.6294234	5835.77473375	5508.12253878	10643.8462603	21824.7532274	7359.64859615	3313.30676061	5369.14489057	8868.81907979	22281.9638176	6700.81812446	1576.59388715	9741.88365353	8727.81579137	17571.7935303	3321.22599425	5018.04633093	8361.83173562	13491.3318193	6289.07841417	5509.49717941	9639.43549765	6635.65831165	8596.95274869	16823.655831	8515.07700823
RP1-34M23	0	0	0	0	0	0	0	0	0	0	0	602.518527445	0	0	0	0	0	0	0	0	782.350179941	0	0	0	0	0	0	0	0	0	0	0	0	0	0	3203.93699778	0	0	0	0	0	0	0	0	0	0	0	0	0
RP5-997D16	44431.8989671	40049.5707895	28499.0222643	48844.5217816	23970.2031936	55672.761369	90950.4320146	36173.6334405	77675.1610513	61389.7596656	50508.7534928	40301.7948357	85455.2301498	89985.626457	61641.5759407	38018.3657952	52819.0778014	48681.1825102	28233.8632612	67503.7127042	44724.3519533	82855.4692317	55571.4331079	69857.1278194	44474.8174905	61037.079041	45787.5457875	68876.0498582	79920.5114913	78128.299337	19782.0763695	61640.7918691	47161.6829465	41799.6656027	37564.5390751	53826.1415628	34249.0446319	49941.8398827	21993.0316815	25954.8547745	27349.5996198	66988.210075	26818.5006395	34409.8707172	32071.2614395	91869.5452458	51364.2340565	30331.245415	68520.3216849
RP4-728D4	0	0	0	0	0	841.357783191	544.070380944	0	0	312.541997831	0	336.401171853	0	433.529284957	0	0	403.36157503	0	0	0	218.402841858	276.639559678	0	343.470492836	0	0	405.783057827	0	0	0	0	0	325.52737673	0	0	715.535281658	0	1361.41416443	0	0	1287.39759255	0	370.222418522	0	0	0	0	1012.70591476	0
RP11-435D7	0	1009.40564177	0	0	0	0	0	596.555488609	2855.75305732	0	0	0	644.92485255	806.734457908	579.867969862	1302.18464262	750.596771346	985.282830363	0	0	812.831355782	0	1060.46731613	0	724.509448237	0	0	0	0	0	714.190191348	0	1211.51747258	0	0	1997.25942719	601.97520103	0	773.117020345	1625.18803087	598.914557202	0	688.929658215	547.201760676	0	0	2744.50823901	0	0
RP4-789D17	0	0	0	0	0	0	0	0	0	0	0	0	0	0	0	0	0	0	0	0	0	0	0	0	0	0	0	0	0	0	0	0	0	0	0	0	0	0	0	0	0	0	0	0	0	0	0	0	0
RP4-665N4	2855.57147695	0	1916.12429371	1111.78729397	5372.10110093	1280.54909945	828.076770997	3415.48385208	3892.89554349	4756.89869233	4005.29544561	3072.02162703	1582.46356081	1979.49866227	7588.43910787	2130.12905121	3683.50524815	2820.5403027	5932.17624258	0	1329.63915255	2105.23124702	1301.04374066	1045.52626499	1777.74169621	2151.19178176	5558.42740972	2191.79203108	4719.90881136	9228.13034042	1168.28076824	3915.49653684	4459.08289794	691.951975765	0	3267.14061079	1477.07723834	3453.46081669	8852.71780808	2658.50181681	4408.70184672	4879.26264583	1690.43893374	447.559558429	987.040040883	3485.18760416	2244.74953085	3082.68295145	0
RP11-268J15	31329.5653217	55058.1899946	6870.10832186	80920.3312432	33466.3923386	103074.79695	64278.8961844	13995.360538	42431.2906203	67539.6795617	37178.1586137	34512.0514523	83026.5307591	8989.95384487	49654.1131886	33986.4523891	80121.9173835	105606.719997	180363.977911	155608.290606	23955.7497971	66121.6711211	16948.7255958	89592.7270199	102408.109702	27920.7839539	158548.580747	81728.3235268	36384.1283971	16129.7727067	51940.8222295	16004.1127762	203931.743619	38206.440812	24420.9074903	58765.5734871	133281.174202	72063.8441083	7028.29830955	19222.5495439	63228.1722957	52078.8896942	56972.7585361	29205.3309678	90243.2772961	42485.9159189	17974.6873478	297317.894171	44264.8891017
RP4-614N24	0	0	0	791.217955426	0	0	0	0	0	0	0	0	0	0	0	0	0	0	0	0	0	0	0	0	0	612.369496406	0	0	0	0	0	0	0	0	0	0	0	0	0	0	0	0	0	0	0	0	0	0	0
RP5-1180C18	631.483759501	0	0	0	0	0	0	0	0	0	0	0	0	0	0	0	0	0	0	0	0	465.552816036	0	0	0	0	0	0	0	0	0	0	547.82543433	0	0	602.082120389	0	763.701569865	0	489.919658075	0	0	0	0	0	0	0	0	0
RP11-109P14	0	0	0	0	0	0	394.864393696	465.330547554	0	907.321631909	0	488.292873182	0	0	1356.94139981	0	0	0	0	0	0	0	0	0	0	410.314148822	0	0	0	0	0	0	0	659.907890057	0	519.306720335	0	658.70641916	0	0	467.170689337	357.946575042	0	0	0	0	1427.19724151	0	0
RP5-884C9	1100.48046977	2386.27035489	0	535.575896728	1293.93809412	3701.2362129	3590.14863215	7051.39053421	1500.24453986	26123.3019854	1715.06803032	2466.45011235	0	0	1370.828227	2565.34182154	6506.26938203	1941.03598525	18289.1421935	0	1281.04123031	13386.6853593	1253.49097236	5036.56292858	183265.936001	414.513270228	1785.08950439	4223.36534644	757.899587399	555.677804673	562.790223884	754.47725666	3341.41478366	1999.98400013	0	524.621262795	7115.45248585	4658.13296707	1827.67576301	853.778117581	19821.9703888	2892.87816788	2171.53851332	862.402774867	16641.8702799	3357.80501629	720.901530618	1485.00589547	8224.96936199
RP11-329N22	0	0	0	0	0	0	0	407.016972608	0	0	0	0	0	1100.83512104	0	0	0	0	0	0	0	0	0	0	0	0	0	0	0	0	0	0	0	0	0	0	0	0	0	0	0	0	0	0	0	0	0	0	547.797375229
RP11-334L9	3072.36180133	555.173102974	3865.48747824	3551.19609892	2935.12692166	1722.20787049	974.468914442	5249.68829976	4450.21518099	3038.83308809	1645.94028828	2410.07410978	1950.89767896	6877.41125366	2391.95537568	2506.70543704	2889.79756968	4335.2444536	398.908586108	5150.20476833	3799.98658828	1132.52848309	4374.42767905	878.828837538	2390.88117918	3471.76012452	1868.8794199	1965.15775304	2909.4063753	3296.64362895	2946.03453931	7372.32062222	1332.66921984	3257.11680021	1761.6023535	2013.90325575	1820.97498311	1857.82096179	3826.92925071	1787.70683396	658.806012922	1766.72202396	2652.37918413	2708.64871535	2820.86979031	3515.41627216	1006.31968764	2850.30213203	1766.36704666
RP5-864K19	6941.14525812	14493.658467	12290.8771934	13136.9743521	10428.3986151	19886.5601439	10623.3086574	13836.9089663	12616.8106385	16380.5950974	8714.1622565	7259.85438806	4630.11110842	14702.2395521	13770.0819032	6472.23125138	16166.2855845	17139.984155	19226.0859534	5745.90240546	6733.3417126	10518.8224377	7320.59276889	13412.945045	11603.2860506	8424.47256992	20016.413459	17758.9051043	16996.8300912	10904.0382327	2760.90122126	31725.1502186	18399.3009604	17286.7469519	6485.68079602	11029.9470415	4321.76253444	16788.9148392	32875.6923108	9573.51200698	7276.56641322	15205.3944685	14077.1764076	7252.66595913	12995.858653	20237.6559711	138936.04294	9886.8527754	19509.6688145
RP11-416A14	843.866189826	1219.88708725	2123.41800935	1642.75297472	0	9460.55892982	4282.41944463	1441.8986922	0	0	2630.28370569	3026.10202125	3117.61879394	1949.90974355	700.78214295	0	907.111344743	595.367091441	0	838.266180528	0	1866.38662572	0	1544.84710455	0	2542.84373844	4562.78483184	3238.54472754	0	4261.02711206	0	1157.09068062	1464.14331328	1022.41334536	3870.78544043	2413.7283212	0	0	0	0	1447.6006562	4436.61136061	3330.34157648	2645.21747986	0	0	0	5693.63246919	1940.62747278
RP11-420K8	0	0	565.737414676	0	0	756.166538118	977.961634565	0	0	1123.58288109	0	0	0	0	0	0	0	0	0	0	0	1989.02851869	512.179106985	0	0	0	729.391410395	862.838081531	0	0	0	0	0	0	0	0	0	815.709920501	0	523.283362389	1157.04281839	443.26359024	0	528.569442661	0	0	883.685747209	910.164903677	0
RP11-69E11	14887.2451128	26678.7989987	14550.8624753	10179.2685962	12296.4303354	16138.30945	39603.1302528	20181.8680631	25159.3804821	22340.1627963	35473.1462171	28347.3247695	35340.9964394	18479.2034866	31775.968591	16979.0574225	14944.9485297	19270.5088126	38594.6339146	23954.8468248	25278.6831596	31384.2561333	23637.2583359	43583.474982	40723.3994898	21132.4529319	24747.3277875	39820.3018379	12371.1808428	14413.1087721	8808.89046079	12484.021191	43441.3570632	17888.0556533	33673.3447588	9501.83603919	33729.8965044	29610.3501119	30922.9116673	16036.1802954	6753.89230639	28461.608807	33989.2984694	20344.1350245	17329.9902046	17869.3623476	13540.4113577	32873.0497607	15986.2280767
RP1-144F13	0	0	0	0	0	0	0	1132.19509986	0	551.90074617	0	594.032351002	0	0	550.262034781	0	0	0	0	0	0	0	503.161869186	606.515676611	0	0	1433.10002465	847.647270237	0	669.161299993	0	2725.68192019	574.830913487	0	0	631.762224915	0	0	0	0	568.33617312	0	653.755432708	0	572.587488505	0	0	0	0
RP1-118J21	629.371773683	3184.35408562	1055.79089428	918.897775992	3700.05709188	4233.52101943	1368.81921092	537.698007291	857.999385672	786.32012665	1961.71660993	1128.46279388	7556.83685923	2544.99089439	8623.83911366	586.854115696	3720.97680377	1332.10897717	1307.45957989	0	549.476715008	1623.98524122	0	864.132703131	2285.59711388	948.251093096	680.602687292	1610.24631938	0	3813.54801066	643.726610596	1294.47101226	2729.96621121	381.267852867	0	0	5968.41298813	380.573692006	5923.13650286	0	11066.3986619	620.420777644	310.479168711	1233.03406774	271.931181832	384.070005208	0	849.284308114	0
RP1-39G22	59837.2865427	79439.1104514	103451.749566	108164.782985	123769.67096	182357.33824	115443.896834	64266.9498864	73583.0517921	123479.644167	76316.6319967	64372.9074358	106472.447688	125285.180745	66525.6444697	55794.9360744	116567.04538	91670.3053345	81686.9522598	102625.321925	53165.2893208	141345.581123	48776.33528	97023.6161406	66901.2306595	71571.7280267	111720.423206	112789.342938	64253.7532097	228888.772142	53957.7409717	94103.5344835	75004.8030088	53263.688102	63483.2256312	156716.388803	67588.0255074	77387.1041775	112763.206258	76171.8564034	104951.51727	109626.19074	75182.2990024	53590.973213	31235.5578415	87934.8340282	68476.7569408	115350.555281	131990.373408
RP1-228H13	0	0	0	0	0	1009.42805806	652.754296755	0	0	0	0	0	3326.45450263	0	0	0	0	0	0	0	0	0	0	1648.32968572	0	678.294442191	0	0	0	0	0	2469.19829452	781.109949427	0	0	0	0	0	0	0	772.284560603	0	0	0	0	3296.754016	0	0	0
RP11-656D10	14475.5507947	4982.32271899	16766.9649163	12076.9421987	7294.39826685	25501.9242361	16990.7400467	8244.70277846	25372.2675477	9760.35458794	9131.32374383	10505.4512478	12733.1317042	9556.70050137	16028.1454234	8998.429774	14078.5009805	17507.7179857	4295.93861963	13010.0139447	8826.51485061	22868.3636009	10992.1516038	8833.35652089	5721.76692454	11943.4482916	8945.06389012	8818.01555851	13292.3927636	33413.9444744	16920.8137642	17958.2169003	8371.89638104	13362.5304624	5269.75063013	5257.74276559	7725.34841321	11670.9265549	55713.9842482	15508.7387732	27788.0997758	11778.1468264	24483.5001612	5942.04988837	12508.8343643	15143.3316339	7224.85929587	9301.68527934	8718.60657644
RP4-739H11	2397.22497237	3465.41172557	1340.47336471	1555.55801852	3758.18962369	3583.36244815	4634.41691794	1365.36479134	4357.39815399	1331.12366804	3736.00806604	1432.74044743	7380.35022345	1846.41134952	16589.6409637	745.092911223	3435.85273677	1127.53173156	3320.0035192	2381.3166657	4185.82261879	1767.3215182	0	4388.54655178	2487.32861529	6621.651476	6912.95808069	4088.86326535	0	13718.5170122	817.300452519	15339.4356896	8318.57220027	968.145121081	0	4571.2222134	6888.84571879	4831.91226794	1769.46952852	3719.64479252	3426.9102583	2100.56121744	6307.14370748	2504.81315503	3452.54451668	0	2093.82864944	4313.13814227	5512.86530485
RP5-1066H13	0	0	0	777.779009261	3758.18962369	0	579.302114742	0	0	665.561834022	622.668011007	716.370223713	1476.07004469	0	1327.17127709	0	0	0	1660.0017596	0	0	0	0	0	0	0	0	0	0	0	0	0	0	0	0	761.8703689	0	0	0	619.940798753	0	525.140304361	788.392963435	0	0	0	0	0	4594.05442071
SLFNL1-AS1	5018.19094217	6687.52266957	3551.41662063	2900.14348078	9034.92274219	4922.64416315	4831.74170077	2143.6227224	2137.8484693	6661.44200627	4032.55370628	3303.80992549	5793.57492541	1721.20157988	15041.4127207	4167.39778909	8765.7192947	885.112409276	2280.42741725	1635.66688476	2692.58853596	3294.95005549	4167.85748309	2727.29882583	1789.84021608	2362.7256403	6020.21435355	3811.58722516	3024.01935372	6017.9906246	1764.34735188	5590.67647185	6802.16580959	1994.98404013	1558.52874886	7027.30181514	4596.58230586	5310.27158246	9462.79126298	2433.26763511	5178.48976408	6028.93890675	3713.33085778	2765.07889692	2506.97888717	4306.38493339	4006.41025641	5819.36685289	2614.59122219
RP11-399E6	8597.1545329	2761.77482697	2403.66607149	10227.5965659	3369.49361565	20347.4051704	15927.8675355	1632.20004244	1302.24272242	3182.53425202	11165.3540552	10276.4581331	5293.62175926	2207.25823763	6346.16925392	2672.1225471	24643.9589699	2021.83037652	23813.0201657	14233.5044359	6671.8187934	7746.60980186	10880.556156	6120.57444214	11893.7236325	7915.73057156	51649.7978427	24439.7791622	2631.48892275	19293.5846902	1954.05336617	5239.21262493	21545.9465238	3472.05344185	0	12750.6934328	12352.7144678	6931.46399451	8461.11825312	8893.16089988	9831.92729945	15694.2311773	3769.87904343	11977.3299088	3301.8242992	9326.85738536	3754.54299703	27069.3206632	13180.5053735
RP11-486B10	11918.763054	51203.6994794	50126.0508254	13888.6630846	4144.98813201	19572.6389563	30911.7882226	9322.17731642	23571.6387873	17757.3203504	9941.58078591	15501.0118925	28373.5292957	5430.52472736	11152.5008298	3756.70395561	32842.1240301	6277.11298282	47427.7755188	3668.62968927	13190.3821596	44924.8084941	18101.2594652	24431.5984773	32919.9384484	26683.4135648	26504.040777	7086.6638864	12486.0745585	47637.5989158	36228.4283103	29002.617256	25630.9976626	7525.36352591	6416.77931323	19046.4194052	20260.9494512	23550.0765987	30110.1837567	31387.1989328	28221.1103841	19526.9276332	8778.16839707	8550.94276775	11459.9222945	19873.6527405	439.872120377	18801.6848122	22390.7901276
RP11-223A3	2277.54505696	13169.6130932	5730.97992235	4433.69335385	17406.5015627	9575.05888661	9081.28368073	5350.94930705	13195.7969058	15650.2686629	2662.1176991	7146.3619594	28398.1584846	12498.8919568	12766.7451821	3716.44679017	14689.4399911	12051.4548918	4731.38171723	13574.5857736	11267.7363283	3777.95053739	6053.16669254	9381.26517045	15951.2647507	6434.04864227	10467.4839924	8740.6411406	12548.3405212	24725.5606521	4076.61057784	5465.10908455	10373.0455916	4829.00826657	10447.0215215	7600.26204618	4908.69339417	8951.83020168	10086.7794001	20320.1775277	4883.73595056	11974.1522955	7303.07127854	4908.25906059	13284.7227288	10423.9272215	30585.4198558	6146.71124057	11129.9829793
RP5-994D16	7514.76181023	10863.2873394	7353.64506398	4876.32496988	11781.0802846	8424.77726995	8625.91451719	1605.04197185	8537.16526842	13039.9177964	7319.71630244	6175.56427464	5205.54153032	5788.08482945	9360.86363328	2919.62363716	8077.96991192	3092.73886769	16912.1310716	8709.04164928	2915.9141482	3231.75765142	3328.73808966	8024.97946823	8446.98453211	5189.34749616	10158.0800416	6408.8339367	6037.97541509	8221.44266081	1281.02666601	3434.69180403	5432.67818403	6069.83496877	0	9553.16988357	9177.86816478	3029.39191773	10400.4178195	4372.59408638	6445.55633275	11111.8290359	3707.15227066	6379.77160908	2705.73788245	6878.75130792	3281.84124421	10985.5843782	8640.79719995
RP11-342M1	191.826870878	277.303588641	0	0	451.097684189	0	0	163.885529236	261.510516122	159.775547311	149.478406312	0	531.520635359	0	477.903418587	0	0	135.33828888	797.003902928	190.553882016	111.650382458	0	291.331235166	0	597.110997859	144.509213474	0	0	0	193.722537409	0	1052.11507351	0	0	0	548.686458336	330.748861728	0	0	0	164.53361179	126.06579172	0	0	165.764369761	0	0	0	220.570808578
RP1-92O14	9267.52089182	41679.7536131	8205.12731928	8018.25254965	19371.8994556	24820.0546041	12317.5003686	8797.35727387	1403.7855886	14151.610925	12437.1759627	6462.03181281	23301.1084551	3569.0550436	36342.8878786	20163.3761557	30993.1777651	9081.18066973	18182.8099715	6137.34691954	8690.4014516	8730.2298252	14074.7659386	4712.73466915	8547.42747141	6205.79101145	14476.0746676	17124.5620887	14183.4013073	21837.9096753	4212.84282502	24708.8721265	19652.7690696	5614.18217273	787.218561984	10308.7001625	9321.14541786	11830.5835529	29642.8506788	5991.63029165	10156.9682156	17933.0744429	11175.5511452	6455.63335715	10677.8558732	10682.5052611	14840.1179654	15284.7939228	2368.04337308
RP11-184I16	0	0	0	0	0	899.660827868	1163.54497247	685.593621237	0	2005.2001524	0	2158.27532219	741.182293229	0	1999.24628415	748.270279715	1725.25228041	1132.33996922	1667.08065836	0	934.149468586	591.619356839	609.373010016	0	4163.2259339	0	1735.60941152	4106.29978247	4421.35025826	0	820.785742295	0	5569.3639038	4861.36835852	2453.97342776	0	1383.64449192	970.503487504	1777.01524079	0	688.304789621	12129.7332988	0	0	0	14691.2918836	5256.89389065	0	6459.10337956
RP11-7O11	14189.6781578	25396.4284807	19269.6054421	15126.8940886	18273.1006254	9847.81340666	15185.619708	13854.653143	14738.4885496	19698.001497	17901.9847904	12115.2738014	12481.6694982	11709.9606682	36473.3829876	4410.36145117	15253.1505473	20975.7339362	21055.4980818	14095.5135491	10225.3308976	22416.744212	7183.38094034	19791.7934256	14723.0205469	17306.8592683	46764.858255	24202.8405491	8376.35522447	31389.3113936	17277.7609128	39839.6500411	20516.4067507	2455.9947147	8265.08824144	30923.4565531	24465.9149029	16343.4878147	19451.4576717	7863.34244738	31875.8026001	23091.0885716	16666.6555556	4765.66560331	14013.48769	13194.9077552	6196.90579641	22794.9737995	9323.37363944
RP5-1198O20	7575.27886319	2108.53342522	1657.53494816	595.367030092	8519.70640594	16299.5057927	1807.86581952	3577.61762021	6093.62984124	1018.93614445	1393.2381624	1349.81022775	2694.34913396	815.407937515	8830.60843615	1316.18487756	2326.57786583	398.350377971	4398.51697647	19957.6306979	2492.09683522	3989.12239169	1250.51355912	861.359930779	3319.75500647	1382.36729549	42791.2666943	5056.00031973	3046.00024199	1425.49175545	1395.61281172	3612.88871598	6612.53173339	2736.32015219	2805.70246076	1570.12539459	2920.54676854	2162.30943297	1927.52503272	912.589436845	1251.06430007	556.587010923	1160.56096318	1069.29750233	3821.92663911	2641.57962327	184.934359398	1777.77427867	10333.4349229
RP5-891H21	0	683.504574013	0	0	0	530.076543053	342.778010105	0	0	0	0	1271.64714335	436.701627543	0	392.64929115	440.877840686	508.255853964	667.170157746	0	1409.045414	275.198555758	697.15949336	359.040127761	0	981.182393467	356.18979502	0	0	0	0	0	648.319652708	0	1145.71947746	0	0	407.618886124	571.816753316	0	0	405.54641499	0	0	0	408.580016923	2885.35003913	619.468149426	638.030171171	1087.33649857
RP11-269F19	6887.71305787	16357.6493347	7840.45499398	2873.20716362	10412.3959574	7721.79476573	5350.02541262	2521.90908518	2012.09267699	2048.88643023	3450.31333158	6174.83039891	11814.3488675	5115.6455625	6945.52968346	3669.9478294	11105.8886992	5206.54358398	8176.32239239	4887.14662112	2290.80314126	5077.87280654	1494.35786509	450.327979497	8167.54180601	4818.10718806	5320.26675818	15104.7419449	10842.4223327	7949.46129979	4025.60536613	6745.91429485	5548.43328783	4172.51563948	9026.77284408	16886.6326471	11875.8297176	6544.87253861	6536.62861123	6107.02465282	8017.62611805	2909.89509828	6310.23544459	4626.53723929	4676.50539632	3602.72726454	1933.71234095	9294.3898399	6222.6917526
LINC01144	10784.7086038	22271.8566456	28799.0119724	18852.2715648	51757.5237648	41207.0965036	19785.7080172	12222.4102593	19203.1301102	12282.5349686	18351.2279244	17363.8087909	17075.7997801	16274.334421	24674.908086	8414.32117464	21293.2452503	31832.9901582	12345.1709806	18802.6535791	6277.10202853	18660.2280767	9025.13500098	31025.2276401	35168.7902107	5139.96455083	26181.312731	30408.2304944	22130.6679521	148921.651652	11030.6883881	25954.0176291	14129.4110852	5599.95520036	10095.7327861	34834.8518496	21251.4847578	21028.1431085	10234.9842729	11269.8711521	36434.6693813	19671.5715416	9120.46175595	5346.89720418	8178.29053758	24176.1961173	5767.21224495	20493.0813575	13666.1029399
RP11-767N6	72377.7539735	28204.279044	42759.5312183	77800.0117006	82141.2674398	106543.612322	56577.8607181	47317.4246416	48047.9655977	85971.0005137	78959.0935496	72221.6188081	77893.5491643	100345.355264	32404.7287907	96244.0749741	60888.7113344	75042.1390473	103289.306811	135667.353652	43225.5015807	91871.1650749	91282.6502747	86989.3587818	80975.440606	65903.4509702	97326.1842827	66825.2222542	61549.5577968	147457.189746	83040.7327669	65586.531288	78623.0268828	72440.8920448	118363.181545	96611.0233178	62939.6278749	92859.9808495	41113.5357257	55664.0489101	68017.8649462	83963.6119078	74515.0004906	103574.861691	51666.9245481	62987.4808541	72562.7172759	60299.1858761	75262.595901
RP4-533D7	11102.1923499	16049.2519444	5587.28278565	27015.7753217	33940.1107166	22403.943094	9658.4529573	16124.5956995	30270.4208043	123912.299683	21628.0702938	8957.79757617	27686.110263	11544.1559154	22127.3512039	12422.6110154	8353.98707459	10965.9944512	64578.4755328	67273.9519394	17447.101358	15551.3866926	5058.33525129	7113.5879947	35710.4081728	25927.2548139	33616.5527906	14202.4675367	10704.4932875	5605.95307369	29524.0747538	12178.4647447	7705.1081737	4035.36594716	74690.5540639	17994.9735805	5742.73687354	4028.01889946	4916.93302615	2584.00102843	17140.6166194	2918.47885963	19716.8010148	14790.5891831	1918.75925352	14905.0884617	0	0	5106.31181629
MKNK1-AS1	2462.91579984	5785.60763344	2324.03541636	1048.80874991	904.962838832	3278.88655915	2566.69930839	2367.19073639	419.700312992	2436.03797655	1919.19269159	3588.00399165	2701.29873823	1244.9117013	2556.6366933	1865.93206357	2812.97268541	868.821996835	639.558960141	152.910722501	2329.45166052	2610.1423322	3039.13884832	3522.5041341	159.718033783	2435.20188693	5326.79469285	2756.84707277	2120.25896843	1399.08080391	1416.98839191	2743.89029293	5475.11751054	1678.51417925	2353.6064164	1614.41733385	1857.87520121	2233.944224	2726.93708935	1313.66596251	1188.27587607	4248.80388583	2278.11709066	1809.45858285	3192.43870892	3569.57333266	4638.53696511	4569.80955319	2831.96679873
RP11-8J9	0	0	0	0	549.722767937	0	0	0	637.370972214	1557.66272708	364.318798987	0	0	0	0	0	0	329.855556252	0	0	544.243603437	0	0	427.951433932	0	0	1011.1811354	0	0	0	0	641.071358454	405.594979951	0	0	0	0	0	0	0	0	0	0	366.387265844	0	0	0	0	0
RP1-18D14	279.755441523	3909.32100756	0	363.066316513	1096.44902921	731.810331489	608.43946095	1673.04548453	0	466.025208857	508.656202252	167.200384226	861.284676721	323.21348326	464.641480311	1304.28181809	3909.38917999	263.165235662	0	277.898946865	651.312340089	343.743159511	424.87008181	682.856103696	290.270509861	0	2016.85038157	1908.67650939	1798.22756416	376.693377994	381.514879223	127.864827442	7604.4034026	564.911238887	0	1066.92054634	964.711496596	1014.98890504	1032.48283936	868.162882694	79.9838816482	10540.7993897	3312.18807929	219.233212838	1208.73275571	1934.81450592	8674.39591996	1132.51936231	2144.4991399
FOXD2-AS1	12900.4908637	36864.0250918	22144.2566841	17082.9286024	19401.335632	33634.1911734	39040.8988759	23196.2363145	17382.267347	15617.7572651	13208.553029	36444.0859805	49045.6482326	23743.2015047	21426.2254882	11049.8852665	24670.9700847	82020.1814096	19943.8393948	8046.55348419	16326.7658118	16699.039949	15491.5297214	31031.1695397	16653.8993257	21357.7590761	44933.8831164	10362.3105112	17149.2528401	20753.868362	5216.52030555	89061.3942047	16396.7711504	13812.5638717	20183.4179575	44622.7080313	18622.1232376	13243.1757281	19432.0759881	49926.1131348	20586.0467968	11731.203236	34928.1021298	11755.3506977	12962.5226573	12083.2801638	31641.5146105	25707.3519585	10693.9479628
RP11-543D5	461.796712469	0	0	0	0	517.718930393	0	0	0	0	359.848629674	414.000460576	0	0	0	0	0	325.808248813	0	0	268.782883906	0	0	0	958.308202699	347.885983848	499.387002454	590.752944165	0	466.360267971	0	0	0	559.504726416	0	0	796.232229092	558.486055999	0	358.272535231	0	0	0	361.89171657	0	0	1210.05312133	0	0
RP11-330M19	1041.40653199	301.09000604	174.699212722	1621.84355667	0	467.007114853	1056.97790388	711.772901738	283.942242741	0	0	1120.34435651	192.371054524	721.909030679	172.965598094	0	1567.23941244	146.947273261	0	0	242.454953385	307.105122698	632.641818921	0	432.219803652	156.904857131	2027.11879524	266.443635581	2868.86174754	0	1491.22279577	0	1084.13046661	1261.74972891	0	794.335237967	359.119682739	2518.90501184	230.608784707	1454.3049507	0	4243.26152959	1849.47303376	163.221775874	1259.88259784	1271.02303882	4366.10202052	0	5268.79821886
RP4-683M8	672.679750961	0	0	0	0	0	0	0	0	0	262.088144043	0	0	0	0	0	2169.2850389	0	0	0	195.762332782	0	255.402986325	0	0	0	1091.15390617	860.524842707	1389.8212273	0	0	0	0	0	0	0	0	813.523030634	1117.1851849	0	0	1105.18804001	0	0	581.286315408	1231.49524458	0	453.862391646	0
RP11-193P11	0	0	0	0	0	1445.00317901	0	0	0	0	0	0	1190.46060111	0	0	0	0	0	0	0	0	0	0	0	0	0	0	0	0	0	0	0	0	0	0	0	0	0	0	0	0	0	0	0	0	0	3377.37429413	0	0
RP5-1024N4	0	0	0	0	0	0	0	0	0	0	0	0	0	0	0	0	0	0	0	0	0	0	0	0	0	0	0	0	0	0	0	0	1209.27392171	0	0	0	0	0	0	0	0	0	0	1092.37684817	0	0	0	0	0
RP11-141A19	0	0	0	0	0	0	0	0	0	0	0	0	0	0	0	0	0	0	0	0	0	0	0	0	0	0	0	0	0	0	0	0	0	0	0	0	0	0	0	0	0	0	0	0	0	0	0	0	0
RP11-93G23	0	0	0	0	0	0	0	0	0	164.902484916	0	0	182.858756194	0	0	0	0	0	0	0	0	0	0	0	0	0	0	0	0	0	0	0	0	0	0	0	0	0	0	0	679.252911798	0	0	0	0	0	259.388031006	0	0
RP11-567C20	0	0	0	0	0	0	0	0	0	0	0	0	0	0	0	0	0	0	0	0	0	0	0	0	0	0	0	0	0	0	0	0	0	0	0	0	0	0	0	0	0	0	0	0	0	535.37031029	0	0	0
RP5-850O15	1496.47841218	0	0	728.298038493	879.77500634	838.848763956	1627.34371398	0	0	623.21992808	1749.16481024	2012.38792467	0	0	4349.58618348	2790.76549651	0	527.900045294	0	0	1742.01232909	0	1704.54836003	2054.67736172	0	1127.34424189	0	957.184193826	0	0	0	1025.96907268	1298.22647658	906.553383756	0	713.401478632	645.058913231	2714.70856246	828.449451225	2322.0049003	641.77921736	2458.65888026	0	1759.09591852	646.579907497	1826.43231105	1960.62285067	1009.685917	0
RP11-296A18	11247.6693531	1250.7348067	1451.40909145	7579.32234542	9155.72747977	5819.87487269	1881.73307616	0	1179.50260375	2882.57125356	20900.1738591	3102.62414132	5593.7964797	0	1437.0061414	3227.02309137	9300.49792541	1220.84470245	3594.76243114	4297.31858064	5035.81725019	5102.8869583	1314.00432964	15047.1659356	4488.62750115	2607.14553412	16841.3961517	5534.06493672	0	4368.77722294	3539.75644263	4745.40177982	3752.91906736	1048.26747593	1322.8891237	824.921709774	5967.1656709	7324.51252753	2873.86257908	2013.7387325	8163.13657391	4548.80153295	5975.47494355	6780.27009206	3738.27233875	0	1133.55551021	5837.60938221	4974.25202794
RP11-275F13	2364.59259055	1139.41286055	2313.89564579	2685.17004559	3707.03102148	4860.05257693	571.416326793	336.69466844	3223.56208984	1641.254575	1228.38380391	1059.92788074	2183.96541691	3187.23466983	2618.21014246	1469.90057041	4236.35245817	2780.45783019	0	782.966945582	1146.90078735	1162.17582558	598.525532351	3968.07324342	408.911615288	1484.43495726	3409.4274932	2520.75209159	1085.66139849	3183.94654154	806.174896621	4323.03617638	1709.44481079	2864.89854678	4218.0077295	0	1698.7677139	4766.13754596	4799.80189909	1834.50544218	2704.20897451	2330.9630892	4277.13501943	4632.5929163	3405.54652849	1442.97715046	3614.32097236	2659.01579189	0
RP11-253A20	2775.54808748	1604.92519444	931.213797609	540.315506434	652.694436857	1244.66350522	2012.17769944	2371.26407345	2270.28156032	1849.4373087	1730.24562351	2488.27710449	1538.11723683	1282.6839906	1382.95945025	1035.21758462	1790.14008741	5874.63988458	4612.74825235	551.425835569	2261.66128714	2455.48210936	1264.58381282	2032.45371277	575.974325368	836.363058513	3601.77351328	710.123376835	1529.21332679	1681.78592211	1703.31200503	2283.46213963	1444.70778257	0	848.75629618	1058.52785767	957.122812257	671.336483244	4916.93302615	1292.00051422	2380.64119714	2188.85914473	1095.37783415	870.034657831	1439.06944014	2710.01608395	1454.56238036	1498.14754057	3829.73386222
RP11-191G24	6325.45076744	6858.02068379	6631.9638107	24627.4899739	2789.03463144	1772.86104315	8025.03811893	675.511362101	11856.9747037	5927.13574458	7393.52856767	4253.07195843	10954.2383043	5481.04881696	656.615201167	2949.06522005	12749.1069251	35144.1691918	4927.69429899	2356.30283518	3221.4419174	2331.67628872	0	10132.3795387	6563.20323697	595.645119403	18810.9431807	7080.34778668	1089.08260038	20760.8699124	4852.29218239	2168.32959477	8231.19224018	1915.95105895	0	1507.73505778	6816.48389401	4781.15688697	5252.64799117	4294.00170901	1356.36532072	2078.49649877	1560.22304949	26024.271971	2733.02263421	6755.11362101	1035.91732551	2133.91603467	3636.63803723
RP4-657D16	7241.75438328	8075.80005755	2082.5605985	3625.07445878	2919.36335254	3479.44690712	7950.03776268	4419.23321001	282.069066868	5687.09597922	10641.1532656	3338.86022905	7835.18104261	5976.22145152	4123.78892696	6945.46201358	7562.08709823	1313.80071745	429.83003231	3083.01305538	3371.97658644	4576.1871087	7070.26793644	5302.92760902	3005.57905245	5611.31103139	7383.73470644	6881.83336276	5414.87797572	2298.47157909	5502.28770838	7092.66689879	8256.83458361	3008.22222339	2847.22975222	7101.8548516	3924.25614833	6505.94806302	5498.09883188	6420.93713497	2839.49375553	17269.0036206	5307.67467302	9404.40980883	4291.10095839	8080.88358401	6505.94806302	8376.1190146	11419.7231823
RP11-91A18	0	714.00215343	0	961.506334284	1742.23160704	553.728252323	1074.21770096	1265.91893055	0	1645.56232979	0	885.591536402	0	1711.92863312	820.338151589	0	530.933936687	0	0	0	574.955512817	728.266347395	375.060290942	1808.40369719	0	1116.248334	534.121269029	0	0	498.79739947	0	0	1285.44865693	0	0	470.91987369	0	0	546.863614129	383.19175356	0	973.783792732	974.627521727	774.125325471	426.810621353	0	1941.32538166	1332.99741798	0
RP11-155O18	5775.41157027	15306.3070334	5651.58655173	3747.66151777	3395.34650784	5395.66404437	4186.97640988	7401.25492389	1312.23435456	4008.69084174	5250.47680893	6903.53709195	9779.43593547	1112.09686141	5595.50345342	7180.33270969	8277.68101801	11544.9444688	13997.5084435	956.180860654	2241.00307298	4967.48426727	5116.55138589	7048.61185299	10986.2315054	5075.93232187	11450.1393274	9850.91865973	2651.67937484	5832.48519278	1969.046103	7919.11678091	13360.7758101	3498.69323808	0	8259.76596871	8298.3282188	6984.6465827	7460.28265412	1493.56581183	10732.9777553	5693.27301838	5698.20591987	3771.63361898	3327.15798947	4699.20947549	0	5195.62164964	0
RP11-25O10	0	0	0	0	3881.81428236	0	0	0	0	687.455315404	0	0	762.312490185	0	0	0	0	582.310795576	0	0	480.390461367	0	626.745486179	0	0	0	0	1055.84133661	1136.8493811	0	0	0	0	0	0	786.931894192	711.545248585	0	913.837881504	0	707.927513886	1627.24396943	0	0	713.223011998	0	0	0	0
RP4-631H13	0	0	0	2782.28288629	0	0	0	0	0	0	742.472489074	0	0	0	791.262875331	0	0	0	0	0	0	0	0	0	0	0	1030.38077722	0	0	0	0	0	0	0	0	0	1642.85890306	0	0	0	0	1252.35991572	0	0	0	0	0	0	0
RP11-334A14	11245.9458365	5419.02032783	3773.08538712	0	881.527546193	840.51977743	1087.05695635	6405.24717849	14309.1052925	1248.92280408	3505.29840459	4704.92555295	2077.37746329	0	21791.2534889	8388.97437098	4835.51784568	6347.41966811	0	0	436.370618294	552.728044537	1707.94387469	5490.05425203	1555.81909402	18638.2341346	4053.78891435	5754.54561149	15490.1389775	5299.97077445	3067.31882977	1028.01283577	12357.7195585	13625.3890049	0	2144.46779134	646.343891145	2720.11634844	25733.092217	581.657602018	0	3941.69057138	1479.41468437	2350.1334582	1295.73583056	915.035311213	13751.6993171	0	0
RP5-1024G6	7361.64930391	7538.04718463	2830.07029444	6269.77357832	3967.23317855	5845.96233137	5114.57197148	3930.84851296	4599.77176769	8941.96155978	3585.28891423	4124.82121478	5099.47915195	5670.15319071	2801.98630262	2288.10928239	5935.03657343	4111.76913845	5734.92050444	7617.49626152	2499.43985767	4975.00287193	3726.76044593	3088.43516501	7956.61354115	3928.24800832	7960.88815649	12164.1182839	2957.47614056	3717.19920192	2823.58322594	3785.29909699	9845.67765105	3344.71651855	3282.96445124	4971.7164171	4230.99766396	3709.58545753	3056.55310978	4521.47531218	3946.39298694	8063.27900094	8473.77864856	3846.02117691	2650.60874875	7112.96397583	8037.43515799	1241.74087103	6701.25395451
RP4-784A16	0	21110.2858908	8908.11929141	1938.27467387	3121.88238581	0	0	1701.28787492	904.909404995	552.874116093	7758.64108953	595.080027106	6130.76711683	3834.47859623	2756.1625728	3094.69807042	713.530264119	2341.56722031	0	0	386.345767872	489.36415936	3024.29567934	607.585369162	1377.46240776	13001.2416186	5024.69638272	1698.28447793	1828.5831315	32176.3909753	0	7281.30431825	3455.06834773	804.226370422	0	1898.62933202	0	802.762143985	6614.44561851	2059.90910909	4554.70823749	436.227660236	654.908440525	0	1720.79202895	1620.27416659	0	1791.43568343	0
RP11-117D22	1771.12621488	5120.6554439	4085.28970739	4740.79181998	0	0	2568.01219806	7187.44089276	603.627803097	4425.59468929	2070.18799895	5954.30074181	20038.9532714	13812.2430187	5883.27220246	12386.0739242	2379.83329268	4685.88922558	0	439.843195901	2319.43818053	1305.73872168	1344.92207858	5674.13254166	7810.211852	3335.61266866	2394.12004118	11328.5564587	3049.43128107	1788.62879245	0	5464.19057882	3072.97843633	2145.86518602	0	2955.16071325	0	1606.46871402	5392.71860427	2404.64095705	759.564579605	2327.91607863	2184.31226928	346.990292947	3826.23168789	2702.0454484	4060.795916	4182.47542796	1018.25865043
RP4-758J24	0	0	1326.39276214	1539.21812337	0	1772.86104315	2292.86803398	1351.0227242	2155.81358249	3951.42382972	1232.25476128	1417.69065281	0	1827.01627232	0	1474.53261003	0	1115.68791085	6570.25906531	0	0	3497.51443308	2401.64656889	2894.96558248	0	0	1710.0857437	2022.95651048	0	0	6469.72290985	0	0	9579.75529473	0	1507.73505778	4089.89033641	7649.85101915	0	0	0	0	0	0	0	0	0	2133.91603467	0
RP11-446E24	280.450313459	405.417020055	117.616049698	0	1154.13107203	628.82403617	0	119.80007763	573.491392659	583.978434844	0	502.847057182	0	324.016298668	116.448895587	0	753.672987622	0	0	0	81.6162631831	103.379090297	319.444048097	128.353541101	0	105.636019685	151.639495902	538.148639524	0	283.221772277	430.270320197	0	1094.83443731	509.682956814	0	133.696327776	362.665387506	508.754995126	155.257106545	0	0	1935.23202326	276.701256168	329.666634506	121.173507254	0	1469.73665259	378.444125374	483.710797054
SSBP3-AS1	7601.87080606	14514.0529207	2887.33058588	2792.1792177	5733.96042623	5145.62107646	3535.42075666	4656.49752961	1955.34920973	4420.25384204	3911.84533592	4757.69203074	4769.10131055	3479.96468333	2620.45517783	4547.22480195	7863.2449114	809.554032874	1489.82627434	1994.71571312	4424.5719018	5181.40413091	5663.63908852	3938.65363165	4613.50166562	1404.66920688	5894.06077211	8623.77725848	4543.93152019	4345.46819813	2640.65291023	3736.73263245	9456.66954017	2954.24465873	0	3008.57498572	3956.88577262	6765.04546111	4446.60139903	3672.15694932	8119.58325378	15458.8177096	3113.31093259	4720.86640937	3470.43880228	3851.23855832	11275.0757685	4451.62209367	8246.18762254
RP5-997D24	677.523529545	0	0	0	0	0	245.590725512	0	0	0	0	0	0	2348.3161448	0	0	364.150908871	239.00425093	0	0	0	749.242515817	0	0	0	0	0	0	0	342.109467503	0	0	0	0	0	0	0	0	0	262.81918651	0	0	0	0	0	0	0	0	0
RP4-705F19	0	0	0	0	0	0	0	0	0	0	0	0	0	0	0	0	0	0	0	0	0	0	0	0	1351.24772526	0	0	0	0	0	0	0	0	0	0	0	0	0	0	0	0	0	0	0	0	0	0	0	2994.8783836
RP5-866L20	0	0	0	0	0	0	0	0	0	0	0	0	0	0	0	0	0	0	0	0	0	0	0	0	0	0	3768.52228704	0	0	0	0	0	0	0	0	0	0	0	0	0	0	0	0	0	0	0	0	0	0
RP11-240D10	604.11608453	0	0	0	710.315936098	0	0	516.121040706	0	1006.35513266	470.749009927	0	0	0	0	0	0	0	1254.99330461	0	0	890.75273951	458.74147945	0	0	0	0	0	1664.21610845	610.086064841	0	0	524.08340106	0	0	0	0	0	668.87652322	468.687184932	0	397.016185159	596.040266096	0	522.038031254	0	791.487394772	1630.40775683	0
RP11-67L3	3443.85652894	6400.81930487	2475.93315599	9098.48935148	6363.13086285	7170.23799675	8916.70902103	5464.13635122	7377.67314896	9834.65486508	4983.78592339	7939.06765574	5907.17443375	18757.3670625	2859.92398731	11468.5869669	3701.96289972	7289.16101757	2044.0805981	19059.8718224	4581.60628253	12694.6820164	4856.66306153	12158.8554464	7146.59908026	10748.0852657	6916.34678563	4405.54973394	2032.95418738	16395.7639308	8051.21073226	14841.0114487	2134.01280301	2384.29465113	33850.3981653	3752.5850327	4665.5045319	5949.88412601	1089.43810187	7633.78081602	11393.4686941	3233.21677587	8737.24907713	16963.9698774	5951.91595895	1200.90908818	1933.71234095	5974.96489708	0
RP11-12C17	0	0	0	0	0	0	0	0	0	0	0	0	0	0	0	0	0	0	0	0	0	0	0	0	0	0	0	0	0	0	0	0	0	0	0	0	0	0	0	0	0	0	0	0	0	0	0	0	0
RP11-101C11	0	0	0	0	0	0	0	0	0	0	0	0	1634.55091939	0	0	550.06075421	0	832.394115307	0	1171.99597654	0	0	1343.86806441	0	0	0	0	0	0	0	603.367575449	0	0	0	0	0	0	0	0	0	0	387.681948831	0	0	509.764409829	0	0	0	0
RP11-90C4	0	0	0	0	0	0	0	0	0	0	0	0	0	0	0	0	0	0	0	0	0	0	0	0	0	0	0	0	0	0	0	0	0	0	0	0	0	0	0	0	0	0	0	0	0	0	0	0	0
RP1-158P9	0	0	0	0	0	0	0	0	0	0	1203.59767381	461.573700915	0	0	427.563386807	0	0	363.247226789	0	0	0	0	0	471.273466915	0	0	0	0	0	0	0	0	0	6237.98019192	0	490.890483928	0	1867.98687677	570.054820747	0	0	676.719790298	0	0	0	0	1349.10163322	2084.29008038	0
RP4-710M16	690.57673516	4991.46459554	579.232068604	672.172318095	811.975831539	0	500.644579897	5899.87905248	0	12654.223347	1076.24452545	1238.20321236	7653.89714916	797.852977637	573.484102304	5151.39465961	0	1461.65351991	5738.42810108	0	803.8827537	509.118308913	0	1896.33525311	0	0	0	2650.25862107	4755.99374111	0	0	0	1797.26949831	5020.14332509	0	1316.84750001	595.34795111	1670.33444271	6116.84512244	1071.5307017	0	3176.85795134	1362.69022304	2164.71008444	1193.50346228	5057.03918784	2714.29346941	931.875259178	2382.16473265
RP11-378I13	0	0	0	200.840961273	0	231.327263306	0	0	0	171.863828851	0	0	0	0	0	0	0	145.577698894	428.65177016	0	0	0	156.686371545	0	214.095719627	0	223.136188048	0	0	0	0	0	358.008726821	0	0	0	0	0	0	0	0	135.603664119	0	0	0	0	0	0	0
RP5-1103B4	0	0	0	0	0	0	0	0	0	0	480.781365876	0	0	0	0	0	0	435.30118489	0	0	0	0	0	0	640.181299344	0	0	0	0	0	0	0	0	0	0	0	0	0	0	478.675600349	0	0	0	0	533.16343192	0	0	0	0
RP6-102O10	0	0	0	0	0	0	0	0	0	0	0	0	0	0	0	0	0	0	0	0	0	0	0	0	0	0	0	0	0	0	0	0	0	0	0	1013.67498235	0	0	0	0	0	0	0	0	0	0	0	0	0
RP11-393I23	607.039226875	0	0	0	0	0	0	0	0	2528.06148246	0	0	0	0	0	0	0	0	0	0	0	0	0	0	1259.71158903	0	0	0	0	0	0	0	0	0	0	0	0	0	0	0	1562.00780483	0	0	0	0	0	0	0	0
RP11-63G10	0	0	0	0	0	0	690.762774794	814.033945216	0	0	0	0	0	0	0	0	0	0	0	0	0	0	0	0	0	0	3091.14233165	0	0	0	974.553197814	0	0	0	0	0	0	0	0	0	0	626.179957858	0	746.687972163	823.366312585	0	0	0	0
RP4-794H19	14162.6285598	10454.5007061	10868.1373321	12025.3726564	31533.1366764	7432.10602237	8082.86465462	61528.3223363	13145.4573613	7780.51908612	9861.98446256	10805.7766331	18090.4261082	15318.2661359	9759.33114049	7305.3705291	18139.3218145	8716.47929071	36933.3778203	11973.3135794	5436.9892409	14884.2714571	9381.61217742	9929.56970003	17508.8816538	10669.1534118	28349.9082538	23899.7167884	6225.82046975	31343.9653281	11711.8042427	37186.244932	20390.1591602	24826.0624003	24418.9021192	7182.56492698	7533.60637894	14212.5534747	12010.8588173	7013.42152633	39544.1847789	8515.34554381	16946.3457881	8737.265583	11457.251011	12872.0339616	16581.3123872	4879.47493597	27025.8400813
RP11-145M4	2374.53830071	10297.848093	4979.2031134	1155.62748695	1395.98368514	2662.08787552	0	4057.33007394	0	0	0	0	1096.57569566	0	3943.83388966	2214.12467625	0	7538.81231875	4932.87589131	0	691.034859253	0	1803.1289697	1086.75364137	0	2683.22154734	1283.91295584	1518.81277443	0	0	0	6511.82894077	4119.92377111	0	0	4527.96143535	0	0	14459.9710209	921.110776697	0	0	0	0	0	4347.13936494	0	6408.47970034	0
RP11-470E16	0	357.001076715	207.140077027	0	0	0	0	210.986488425	0	0	0	0	228.093501	0	205.084537897	0	265.466968343	348.469452471	0	0	0	0	0	0	0	0	0	0	0	0	0	0	214.241442822	0	0	0	0	0	0	0	0	162.297298789	0	0	0	0	1294.21692111	0	283.963206319
RP11-467C18	2227.00781457	1609.67349383	1867.93773603	0	9164.75679681	3745.03782488	0	3805.24743621	0	6492.18155849	0	998.255548429	1028.44525303	6432.39456823	3698.80279001	1038.28035854	3590.87271972	0	9252.79087305	0	1944.30222234	820.915616442	1691.10024673	0	2310.71356568	2516.51251629	2408.28643196	4273.34600143	4601.21287972	2249.01549347	3416.70277932	3053.62392636	1931.97608793	2698.20326644	0	0	0	0	2465.74008264	0	1910.14761143	2927.11341247	1098.61859698	872.608724866	0	12231.1524735	5835.46327743	1502.57992974	6401.77405963
RP4-782L23	688.05177452	2983.92856077	15582.0838931	669.714649656	35596.3079348	2314.11843658	1995.2562782	2939.15364132	3751.98268835	573.088891818	536.154722457	1233.67596113	635.492679204	794.935782107	11999.1326341	641.569947324	3698.09561019	970.872843813	5717.4466455	683.485770595	400.471755728	3043.54089606	522.478869648	1889.401669	713.913331992	1036.66207253	3720.29622487	4400.94743596	947.720873457	694.851221931	2814.97998637	3773.76558359	5968.99376345	5001.78813926	0	0	5931.71176152	832.113593491	8379.91007976	1601.41928453	1770.46588482	8139.19469903	2715.41561812	3774.39166916	8918.54735295	839.758183234	3605.82557179	0	1582.3032045
RP11-575B7	0	0	0	0	0	0	0	0	0	0	429.394777722	0	0	0	0	0	592.345036245	0	0	0	0	0	0	0	0	0	0	0	0	0	0	0	0	0	0	0	0	0	0	0	0	0	0	0	0	0	0	0	0
RP11-776H12	209.323871336	32983.0872412	0	203.745224339	0	0	0	3755.51255593	3138.99886482	174.349067756	0	187.658718225	193.333979713	0	173.831388073	0	225.012046582	0	0	0	121.834288311	4475.31416705	0	383.204565423	0	0	0	267.777335648	288.322201213	211.392446271	642.2945158	287.020268941	726.371432393	0	0	0	0	0	0	0	0	2751.29124977	413.051263379	164.03879255	361.768290847	0	3290.9676103	564.929940213	0
RP11-436K8	321.129966435	1160.55810775	0	312.571598432	0	180.008928443	0	0	0	0	0	143.946405874	0	185.50762492	400.019840984	299.43580306	1208.19181668	0	0	0	0	236.74870167	243.853192575	0	333.200164334	0	0	821.610323369	884.647299968	0	164.227181372	440.326317027	2089.40246711	1167.22615707	0	153.089139826	415.270435181	582.550514897	177.77733531	124.570015449	0	2532.50255994	475.255655859	125.828391214	138.749869228	979.837299976	2103.65463713	0	1476.99633594
RP4-802A10	5605.42605242	1157.59498067	671.66271785	1558.86771643	0	897.746655894	5224.8120519	2736.53964562	0	2000.93376909	3119.96418281	2871.57766272	2958.42123851	0	0	2986.71286116	2582.37229631	564.965367623	3327.06735648	1590.92219794	0	1771.08177675	608.076471697	732.980647478	830.873601276	1809.74729895	1731.91662553	1024.39074361	5514.92891257	808.688549779	4095.19694826	1098.00519905	694.689274171	0	7346.25662311	763.491369684	690.350283734	968.438586467	3546.4687146	0	0	9472.63723483	0	2510.14254472	0	2932.00676316	0	0	9207.65800917
RP11-430G17	0	5096.67110926	2217.90265145	0	3109.08778587	2964.45617052	1916.98802841	1506.05811878	0	5139.01022663	0	1580.37646543	2442.25640884	3055.01081601	0	0	7579.79690408	621.858835557	5493.16741526	2626.6982425	513.016511436	1949.43427417	1338.62267774	3227.17474768	7316.35770679	663.997838023	6672.13781968	11275.4953043	1214.05929223	15132.1346902	1803.03753225	1208.57715118	1529.29254736	0	0	4201.88458726	9118.44402871	0	0	683.822286213	9072.0828009	1737.75936783	1739.26503877	1381.46018269	0	1075.75579913	1154.79308418	0	4053.95715626
RP5-849H19	206.907268094	299.103705835	1041.28029925	0	729.840838135	231.963127141	450.00213751	176.7693284	0	517.008725384	0	370.984469894	191.101976649	239.048858061	171.824538623	0	222.414326418	145.977857495	429.83003231	0	240.85547046	152.53957029	314.234130509	0	0	155.869750872	1566.24675591	0	0	208.951961735	0	567.413351903	179.496403991	0	0	1183.64247527	0	250.228771654	458.174902656	160.523428374	532.405079162	1495.74047108	0	162.144996704	178.795873266	757.582836001	271.081169292	0	0
RP11-230B22	306.485603145	8861.06907026	20051.4293456	894.952557073	2522.54706622	2061.60062673	3110.68252819	523.686332834	835.641095492	1531.65939979	0	824.29244797	849.221080271	708.191975264	5090.37191784	285.780750152	3294.55748986	432.465346552	0	0	713.544138057	1355.71406364	1861.86281236	0	954.0161057	230.885241723	0	1960.35687905	422.15253891	309.514347228	626.951975792	3361.97031632	3722.35783717	2227.99520535	3280.29102742	584.431504482	1585.3320848	2594.59523573	7126.14947336	1188.89298132	1840.15034554	2014.17820321	907.165519001	240.180577365	3178.14032708	748.12333262	401.544500768	827.153120931	1762.05181772
RP4-771M4	1683.956692	0	1412.44508899	2458.6168682	989.992904226	943.939436846	610.40558399	719.336484027	0	3506.48348797	656.099850524	0	0	2918.32129404	699.214397664	3140.39159898	905.082012875	2376.14069604	0	0	980.125505071	620.737088048	0	4624.17321228	873.625486801	634.288762496	0	0	0	0	0	1154.50211086	1460.86782488	1020.12606718	0	0	2903.48665195	2036.53751964	932.237301937	0	722.181087991	553.335756944	830.722786975	659.824941845	1455.16641374	0	3309.37346941	1136.17900727	0
RP11-5P4	0	6930.82345113	2010.71004707	0	0	0	0	0	0	0	0	0	0	0	0	0	0	0	0	0	0	0	0	0	0	0	0	0	0	0	0	0	0	0	0	0	0	0	2654.20429278	0	0	0	0	0	0	0	0	0	0
RP11-335E6	0	0	0	0	0	512.686425602	0	0	0	0	356.350708608	0	0	0	0	0	491.581603591	0	0	0	0	674.287918244	0	0	0	0	0	0	629.894675311	0	0	0	396.724129843	0	0	0	1182.7386392	0	0	0	1961.20866544	0	1353.58354476	0	0	0	0	0	0
LINC00466	3864.45507823	2671.77055806	845.575385864	3270.83851216	1580.45295782	3390.59674503	487.234457221	0	1603.38635198	1259.51634572	1178.34361547	4368.25932397	931.110255869	194.120478934	697.65365124	156.669089815	1083.67408863	592.70920264	698.09002569	333.809568317	0	1114.83272554	1658.63716164	153.795046569	0	1012.59670299	363.393220536	2149.39129239	0	16968.0186784	2577.7802219	0	2477.93183064	0	1541.40205931	1121.37794922	3910.95763419	406.398335392	1302.21898114	391.060869928	4611.64209046	0	5304.75836826	2370.06762593	0	0	0	906.914314736	0
RP4-792G4	0	400.935623371	0	0	0	0	0	0	0	231.009302745	0	0	0	320.434688882	230.323386703	0	0	0	0	0	0	0	210.608652688	0	0	0	0	0	0	1400.45548414	0	0	0	0	0	0	0	0	0	215.174735603	0	0	0	0	0	338.502377471	0	0	0
DLEU2L	3176.07021656	2754.78299197	1775.9858081	2576.18785768	6099.5259019	2373.78862599	5756.35645662	1085.37859362	721.63661411	2821.75751403	2887.39301307	1898.22995988	1857.85525034	1957.04021519	439.590486295	1974.33902214	5462.5709334	224.079090956	659.79816774	525.832231386	1910.21084722	2419.56507147	3215.70679829	2810.27460623	768.937875724	3588.95033969	4922.93038003	3927.55157112	2770.65064356	2031.38924037	1624.25532969	2612.97439775	6980.11276326	1410.95917646	647.49003523	5753.5678745	1825.39878118	3584.99347339	937.744188953	2217.66164212	5993.18887705	8488.21720652	4909.32630986	3650.47453058	1921.1880627	3747.14038274	2219.281674	4714.42377955	6695.3012528
RP11-182I10	1561.6776791	0	0	0	0	0	0	0	0	0	0	1400.04305132	0	0	0	0	0	0	0	0	0	0	0	0	0	0	0	0	0	0	0	0	0	0	0	0	0	0	0	0	0	0	0	0	0	0	0	0	0
RP4-535B20	0	0	0	0	0	0	0	0	0	0	0	0	814.085469612	0	0	0	0	0	0	0	0	0	0	0	0	0	0	0	0	0	0	0	0	0	0	0	0	0	0	0	0	0	0	0	761.6620456	0	0	0	0
RP5-1044H5	0	0	0	0	0	0	0	0	0	0	0	0	0	0	0	0	0	0	0	0	0	0	0	0	0	0	1589.84533985	0	0	0	0	0	0	0	0	0	0	0	0	0	0	483.088053426	0	0	0	0	0	0	0
RP4-630A11	3559.0006682	1286.21664519	2238.87572617	2598.11286072	2092.32542879	0	645.038524926	2280.44970468	2425.92734105	741.086581145	1386.65074792	0	821.783677363	1027.96660239	738.886136538	0	0	1255.47859472	3696.7415072	1767.69133104	0	0	0	3257.69176657	1846.38578061	0	2886.52770922	1138.21193734	6127.69879174	0	910.04376628	2440.01155345	771.876971301	2156.01112071	0	848.323744094	1534.11174163	1076.04287385	985.130198501	2070.86607243	1526.31180299	2338.92277403	0	1394.52363596	3844.32261786	6515.57058481	1165.71311334	1200.64306443	4092.29244852
RP11-397C12	0	0	0	0	0	0	0	0	0	0	0	0	762.312490185	0	0	0	0	0	0	0	0	0	0	0	0	0	0	0	0	0	1688.37067165	0	0	0	0	0	0	0	0	1280.66717637	0	0	0	0	2139.66903599	0	0	0	0
RP4-598P13	7488.21745263	1411.9454349	3823.13207911	3802.77418715	4976.51277375	365.000803002	3540.45799365	1112.60694934	9320.72343017	2711.76145177	7864.68479992	4961.91728484	0	2256.90245404	1351.85482593	2125.06170268	2099.8529053	1378.20271341	3381.7509895	323.414114633	5495.40091792	6480.68850835	3461.19652575	5662.21209514	0	1962.12509921	1056.22942993	3331.9283702	1793.78310651	657.584114872	2664.00355112	4464.20798924	2824.42870987	7889.21024272	4977.99973019	620.832082615	842.036245731	6299.87730989	7569.99269315	505.176671649	0	855.851499495	4175.89110304	3316.8189767	3657.42734872	3576.23662289	1279.66257857	2636.01392518	748.719595901
RP11-342H21	437.12464653	0	366.645153762	425.474928411	0	0	0	0	0	0	0	391.88196907	0	0	0	0	0	0	0	434.223828706	0	0	0	0	0	0	0	0	0	0	0	0	0	0	668.358616504	0	376.846264059	0	0	0	0	287.271873814	0	1027.67159932	0	0	0	0	0
RP4-547N15	320.037687638	0	134.218315217	0	376.29832329	0	232.0164082	136.710632806	0	0	124.692446082	0	147.795278709	0	132.88640976	149.208656967	0	0	0	0	0	0	0	0	0	120.547226546	173.044390731	0	0	0	0	0	277.6394208	0	9542.01274813	305.136856932	137.952650236	0	0	0	137.251252692	0	157.879713341	0	0	0	209.649934925	0	0
RP11-393N21	0	0	0	0	0	0	0	0	0	0	0	0	0	0	0	0	1081.74240576	0	0	0	585.716712255	0	0	0	0	0	0	0	0	0	0	0	0	0	0	0	0	0	0	0	0	0	0	0	0	0	0	0	0
RP4-694A7	1176.13850207	3400.43525571	657.669744561	763.195652838	1843.86178412	879.043600563	2842.20100045	334.941050375	1068.92423465	6857.36677116	2443.9719432	702.938282019	5069.37805973	0	1302.28681565	1096.68362871	1685.71524898	1936.18339529	0	0	2510.04016064	289.030706622	297.704105935	2511.98576063	0	1476.70352519	423.958757292	0	540.003456022	1583.68174332	1202.96410355	2687.82522685	1020.32487144	0	0	2990.34119793	675.967986156	0	2170.36496857	3041.58454388	4035.18682915	0	773.610595371	3072.30988546	1693.90465349	2870.92328893	0	0	1803.16636013
RP11-424D14	0	0	503.479230286	0	0	0	0	512.828402488	0	0	0	0	0	0	0	0	0	0	0	0	0	0	0	0	0	0	0	0	0	0	0	0	0	0	0	0	0	0	0	0	514.856373735	0	592.23777636	0	0	0	1572.8760668	0	0
RP11-74K19	0	0	0	0	0	0	0	0	0	0	0	0	0	0	0	0	0	0	0	0	0	0	0	0	0	0	0	0	0	0	0	0	0	0	0	0	0	0	0	0	0	0	0	0	0	0	0	0	0
RP3-380B4	0	0	0	0	0	0	0	0	0	0	0	0	0	0	0	0	0	0	0	0	0	0	0	0	0	0	0	0	0	0	0	0	712.89073987	0	0	0	0	0	0	0	0	0	0	0	0	0	1076.6302335	0	0
RP11-181B18	0	0	0	0	0	0	0	0	0	0	0	0	0	0	0	0	0	0	0	0	0	0	0	0	0	0	0	0	0	0	0	0	0	0	0	0	0	0	0	0	0	0	0	0	0	0	0	0	0
RP4-677H15	0	0	0	0	0	0	0	0	2245.44259358	685.951036815	1925.2295395	0	1521.28882068	0	0	0	0	0	0	818.08909522	0	607.1542196	0	0	854.508955361	620.409358503	0	0	0	0	0	0	714.450675844	0	0	1570.41988513	0	995.987167701	0	0	0	1623.68326053	0	0	711.662348952	0	0	2222.63464443	0
RP11-180O5	2618.18657852	4731.04035577	0	2548.40983208	769.611875111	6604.29279031	3321.66795184	2236.82371033	1784.6387222	2180.72781791	4590.41686723	2347.20261126	604.546948738	0	4892.06873357	4272.29796227	703.602886531	461.797778753	0	0	2666.79365684	5790.66737441	1491.10926103	2396.52803002	2037.44657009	3451.63397887	3539.13397392	1674.65617215	901.570987446	3305.07494257	2008.42702506	897.499901836	2271.33188773	793.037133964	0	1872.21361957	1128.57263776	1583.18655875	2174.13951634	0	1122.83459594	8603.16811666	1291.59334184	4103.53737745	565.61685821	0	0	1766.51136088	0
RP11-42O15	0	0	0	0	457.628571033	0	0	0	0	324.177480687	0	0	0	0	323.214928393	0	0	0	0	0	0	0	0	0	0	0	0	0	0	0	0	0	0	471.557758045	0	0	0	0	0	0	0	0	0	0	0	0	509.924143684	0	0
RP5-952N6	902.11965643	260.819578578	454.000207175	2283.00137762	2333.55470282	0	5493.65025591	2158.00945208	1475.79184841	0	3655.41345292	11645.9956983	333.283313063	0	449.494969927	672.941056925	775.784582464	636.466257869	2248.88061967	0	2730.34962127	9710.10159161	5480.2673384	4624.17321228	187.205461457	271.83804107	975.552269896	2308.07118645	745.546478113	182.206911983	553.617228863	0	313.043105331	7650.94550385	8551.85035145	1204.16424078	155.543927783	0	399.530272259	279.954090329	154.753090284	355.71584375	890.060128902	1696.6927076	1870.92824624	660.615138392	945.535276976	0	1037.29608445
RP11-99H8	0	0	0	0	0	0	0	744.313445278	0	0	0	0	0	0	0	0	0	0	0	0	0	0	0	0	0	0	0	0	0	0	0	0	0	0	0	0	0	0	0	0	0	0	0	0	0	0	0	0	0
RP3-333A15	36534.595072	3353.2797591	486.412137734	41205.5095153	1363.7190391	74115.971992	20600.4830603	5449.88827729	158905.716732	1449.05835358	16719.9313218	14037.1034437	1071.23111102	4689.99862818	481.585263106	3244.42614348	7480.5237551	6137.14305353	73487.6896073	576.065818976	6750.63329379	52586.6653898	14091.6334889	128988.782355	9025.66855007	82131.110085	19440.6974068	40060.1495727	14377.9040371	8784.67530962	36181.6013888	795.165552474	10061.7552808	15457.5034586	0	9952.44528125	27497.0028267	18936.0333779	1926.24071171	4049.19729725	994.807230607	16768.887007	13731.8860688	4544.55699545	6514.61635612	17694.4424587	53184.5381911	28171.6372651	47343.5358653
RP11-82L20	0	0	0	2154.90537272	0	0	0	0	0	0	0	0	0	0	0	0	0	0	0	0	0	0	0	2026.47590773	0	0	0	2832.13911467	0	0	13586.4181107	0	1920.61152271	0	0	14775.8035662	1908.61549032	2677.4478567	0	0	1898.91144901	0	0	0	0	0	2900.56851143	0	0
RP11-175G14	0	0	0	0	0	0	0	0	0	0	0	0	0	0	0	0	0	0	0	0	0	0	0	0	0	0	0	0	0	0	0	0	0	0	0	0	0	0	0	0	0	0	0	0	0	0	0	0	0
RP4-660H19	0	21806.3984334	0	1468.27219784	0	0	0	644.375567856	0	0	0	0	696.62223552	0	0	0	0	0	0	0	0	0	0	0	0	0	0	0	0	0	4628.63943651	0	0	1827.6406895	0	0	0	0	0	0	0	495.673513735	0	0	0	0	1976.3392663	0	0
RP11-262K1	0	0	0	0	0	0	0	0	0	0	0	0	0	0	0	0	0	0	0	0	0	0	0	0	0	0	0	0	0	0	0	0	0	0	0	0	0	0	0	0	0	0	0	0	0	0	0	0	0
RP11-25L19	0	0	0	0	0	0	0	0	0	0	0	0	0	0	0	0	0	0	0	0	0	0	0	0	0	0	0	0	0	0	0	0	0	0	0	0	0	0	0	0	0	0	0	0	0	0	0	0	0
RP4-788P17	0	0	0	0	0	0	0	0	0	0	0	0	0	0	0	0	0	0	0	0	0	0	0	0	0	0	0	0	0	0	0	0	0	556.7721026	0	438.145230466	0	0	0	0	0	0	0	0	0	0	0	0	0
RP11-439H8	1336.52102508	0	224.205594737	780.541008584	942.88386688	299.673954737	581.359295548	228.368897983	364.405989085	0	1249.75838005	239.638050688	246.885295117	308.828034668	0	0	287.337826531	377.178583498	1110.59776814	265.530338434	155.581001693	1379.46473615	1217.88043337	0	0	604.105987576	2312.5023125	1709.74307349	736.368349121	0	0	0	1623.24411365	0	0	1274.29312412	460.887263288	2586.17122522	295.958859351	0	687.815936787	2283.68897983	263.730884785	3351.61078414	461.973996408	0	1751.05343375	0	1229.43160918
RP4-650F12	1247.61653258	0	0	2833.52198181	488.979920651	0	0	0	0	1039.158974	972.187734312	372.829144054	384.104414944	480.474997583	1381.43131826	0	447.040508017	0	2591.80385228	413.11239394	0	306.596108682	315.79662066	0	0	313.289587664	2248.62103315	532.004032591	572.821345615	0	0	0	1082.33356528	0	0	0	1075.57337024	1508.83801869	460.453120404	322.643222335	0	3552.96583823	410.312801965	2933.12236579	0	507.566548319	2179.43269367	0	3825.5021121
RP11-17E13	6661.31540995	5777.73069997	1117.45655713	3890.27164632	0	20910.3468877	7726.76236584	1707.31013289	2724.33787238	0	10900.5474281	2985.93252539	11689.6909999	33093.2469574	4425.47024079	4347.9138554	9308.72845455	6579.59667072	24908.8405627	5293.68802146	1550.85345404	7857.54274994	5058.33525129	2438.94445533	15205.7221897	9534.53886705	30975.2522142	14486.5168874	5505.16797644	11436.1442703	6131.9232181	4566.92427925	10401.8960345	4035.36594716	1018.50755542	1905.35014381	6317.01056089	11278.4529185	4425.23972353	4134.40164549	29139.048253	19699.7323025	7886.7204059	6786.27033108	3453.76665633	3252.01930073	12218.323995	8089.99671906	19148.6693111
RP11-93N20	0	0	0	0	0	0	0	0	0	0	0	0	0	0	0	0	0	0	0	0	0	0	0	0	0	0	0	0	0	0	0	0	0	0	0	0	0	0	0	0	0	0	0	0	0	0	0	0	0
RP11-510C10	0	0	0	0	0	0	0	0	0	0	133.12602505	0	21144.0501136	0	0	0	0	0	0	0	198.872492404	0	0	312.756154621	0	0	0	0	0	0	0	0	0	0	0	0	0	0	0	0	146.534247087	0	0	133.881865186	0	0	0	0	0
RP4-682C21	6393.19008511	14465.6625354	5129.24113927	4058.35206826	4575.60974494	3427.88051032	6649.99465985	5461.9633621	5305.14834332	4398.90166371	15378.6122275	5482.29561161	12066.3820455	5138.31459749	3000.83815718	8812.34703126	11354.3006431	2157.21635939	1154.89044132	2208.96139743	3397.50299708	9426.58493681	8231.93628228	5343.07163265	576.825099852	5653.78956763	7514.77856352	12801.1014637	3828.68033812	5614.2336543	2843.04662582	4573.67010537	12057.014729	6061.98990881	4250.04999121	7155.61704675	8626.82924725	7059.44523518	3385.38464817	3450.42382526	12874.4513308	24661.0385914	12066.954043	2613.95937079	2161.79264493	6785.04765478	10925.3319116	9377.25288501	7670.78156155
RP11-550H2	0	0	0	0	0	0	0	0	0	0	0	0	0	0	0	0	0	0	0	0	593.653253071	0	774.514747148	0	0	0	0	0	0	3090.11071867	0	0	0	0	0	0	1758.61589894	0	0	0	0	0	0	0	0	9958.75829222	0	1376.34692751	0
RP5-1102E8	0	0	0	0	0	911.319499503	589.311654522	694.478203802	0	0	633.42685353	0	0	1878.31478537	0	757.967086795	873.804880681	0	0	807.487508673	0	0	0	2232.18728498	0	0	3516.20222031	0	2239.32318696	1641.82988508	1662.84454919	0	1410.38427154	984.873330517	0	0	0	0	0	1891.95755645	0	3205.28401755	0	637.023215993	4917.07959891	0	5325.01778556	0	0
RP11-415A20	0	0	0	0	0	0	0	0	0	0	0	0	0	0	0	0	0	0	0	0	0	0	3827.62421916	0	0	0	0	0	0	0	0	0	0	0	0	0	0	0	0	0	0	0	0	0	0	0	0	0	0
RP4-564M11	9844.53957467	22988.8580668	22866.2639558	52333.4161946	9794.35635831	848.975710805	8234.94857275	1940.90588547	4129.44573547	34690.904045	64320.2273986	33265.8116561	1398.85108863	11373.8196108	25783.7067726	9885.59890665	19536.659626	3739.91158849	0	752.246914518	440.760664755	11165.773777	78780.7726611	27033.2701575	4714.41359275	97551.569696	4094.571499	29062.1921224	19818.2354886	14530.359657	20138.1515926	12460.2602066	4598.64730789	7339.9815216	0	4332.08382799	1958.53903434	14653.235755	2515.35255915	5287.58359339	0	14432.3770971	23908.7701105	8308.21828182	9161.39981608	9242.40897845	2976.43851273	36787.5102315	6095.21023142
RP11-375A5	0	0	0	0	0	0	0	0	0	0	0	0	0	0	0	0	1073.13437601	0	0	1983.37780645	0	0	125841.183877	0	0	0	1079.57667639	0	0	0	0	0	0	0	0	0	860.648894841	0	0	0	0	656.077144175	0	0	862.678232019	0	0	1347.14062666	0
NEXN-AS1	2955.74073819	3085.90983066	2479.1739062	3835.95720798	579.223597106	1288.65030449	1666.63095315	2244.63112293	223.858478461	410.313643749	1663.43640113	3091.45631883	1971.63544582	1897.16349395	681.825557931	1224.91714201	1765.14685757	1506.08132468	1705.63008022	1468.06302297	669.025459286	1936.9597093	1496.31383088	4058.25672622	340.759679406	123.702913105	1775.74348604	3150.94011449	2487.97403822	829.152745192	1007.71862078	1125.79067093	4416.0657612	2387.41545565	753.215665982	1878.74839661	1698.7677139	5560.49380362	1090.86406797	764.377267573	704.221087112	3129.53377717	810.06345065	772.098819384	1277.07994818	2805.78890367	3227.07229675	1107.92324662	2832.19847141
RP11-386I14	0	4971.91577859	4121.16811213	478.242706739	4621.69011163	550.836720979	1424.8109454	2098.84731306	0	0	1148.60300203	0	1815.21929778	1702.98905801	0	458.144596849	2112.64574285	1039.94930594	1020.70604278	0	0	362.231694984	746.203503127	0	2039.2198047	0	531.332124021	5656.88361025	7444.43406735	0	3015.26250498	0	2983.71763972	2976.47749366	0	936.921524156	423.583072265	4159.48165728	1632.02378838	1905.95376118	0	12270.1842917	1454.30712446	0	3396.6547621	2998.35330437	4506.10512872	663.018297979	3954.72517626
RP4-726F1	0	0	0	0	0	0	0	0	0	0	0	0	0	0	0	0	0	0	0	0	0	0	0	0	0	0	0	0	1460.291036	0	0	0	0	0	0	0	0	0	0	0	0	0	0	0	0	0	0	0	0
RP11-339A11	0	0	0	0	0	0	0	0	0	0	0	0	0	0	0	0	0	0	0	0	0	0	0	0	0	0	0	0	0	0	0	0	0	0	0	0	0	0	0	0	0	0	0	0	0	0	0	0	0
RP11-339D23	0	7504.40884019	0	631.610195452	0	0	0	1663.15556048	0	2161.92844017	0	0	0	0	0	1815.20048889	1395.07468881	457.816763419	1348.03591168	0	0	0	0	0	0	0	0	0	893.798823761	0	0	0	0	0	0	0	4475.37425317	784.769199378	0	0	0	0	1920.68837471	0	0	0	0	0	0
RP5-933B4	0	9353.63279508	0	0	1267.98518106	0	0	921.327817651	0	898.222417835	0	0	0	0	895.555403311	11061.1070861	0	0	0	0	0	0	0	0	0	0	0	0	1485.39632602	0	0	0	935.5414294	0	0	0	929.698089842	0	0	0	0	0	0	0	0	0	0	0	0
RP5-887A10	2654.19125996	26090.7867293	12912.2183982	10333.819841	624.156316204	595.121196432	8466.47180954	6349.23514392	4342.03356247	4421.43334026	1654.59313503	1903.58462832	19121.248696	49677.319743	7053.288254	8414.61063493	1711.86880009	16478.8205958	0	0	3398.64394107	0	0	10203.8349656	550.790680677	1599.58858582	5740.48528915	75377.2427276	2193.52602728	3216.50452803	4886.51145025	2183.62105877	460.513341129	3858.92540504	0	2024.49051482	0	641.983266064	26448.4532136	5765.71174468	0	1046.57722153	2094.96804388	4575.96507623	0	5183.04909708	695.48187157	0	610.380714289
RP3-445O10	0	846.142520862	0	569.726148308	1376.44425564	0	1273.02315417	1000.13501823	0	0	0	0	0	2705.00698484	0	0	629.193872092	0	0	0	340.681260316	0	444.472693153	0	1214.65192099	0	0	748.777059867	806.22599966	0	0	0	0	0	1789.91218915	0	1513.8318819	2831.51561829	0	454.109045432	0	769.334629406	577.500911008	0	505.800456409	714.382155877	0	0	673.032544993
RP5-837I24	0	0	0	0	0	0	0	0	0	0	0	983.703718277	1013.45333972	0	911.221095497	0	0	0	0	0	0	0	1666.44863964	0	0	0	0	0	0	0	0	0	0	0	0	0	2837.88309057	0	1214.89817483	0	0	0	0	0	0	0	0	0	0
RP11-147G16	0	0	0	0	0	0	0	0	0	0	0	0	0	0	0	0	0	0	0	0	0	413.516361188	0	0	0	0	0	0	0	0	0	0	0	0	0	0	0	0	0	0	0	0	0	0	0	0	0	0	0
RP11-413G15	0	0	0	0	0	0	0	0	0	0	0	0	0	0	0	0	0	0	0	0	0	0	0	0	0	0	0	0	0	0	0	0	0	0	0	0	0	0	0	0	0	0	0	0	0	0	0	0	0
RP11-475O6	1873.14961436	1203.47201677	1629.32375427	2228.39062506	244.715296694	77.777129635	3068.00535644	474.165394817	851.198653215	1271.25377403	1135.26438652	4104.90041924	1473.75730821	240.458915841	806.57764066	1746.60765936	1789.81010767	1223.65770868	1729.46174106	0	2220.86502693	1687.83277157	2950.15165623	190.507412524	1583.63742621	992.998057121	2025.62414544	2662.47179444	1528.93144415	1891.66040492	1561.08152793	1807.40763642	2046.2920924	3110.02120278	1378.97474554	3968.747765	2511.98425823	2936.5557138	4685.58792847	1507.05608368	2201.68719157	2051.67718911	1163.62441626	1685.38142288	1258.95365215	1778.12023056	727.147129132	1685.10530738	1595.42830021
RP5-836J3	2204.18342994	0	0	536.360048846	1943.74887931	0	2396.93671488	0	2253.66163674	0	0	1976.04905048	508.95240926	0	0	0	1184.69007249	388.775582405	2289.48998176	0	962.187629795	4468.7617305	2092.21040774	0	2858.78911127	415.120171063	0	2114.77444873	0	0	1127.22844257	755.581908573	0	2002.91223439	842.542853309	525.389375918	1900.23211335	0	3660.70343162	427.514079375	2363.21336993	1086.41764284	543.679481373	0	476.178174921	1345.08851019	0	743.590067719	2534.46516211
RP4-552O12	0	0	0	0	0	0	0	0	0	0	0	0	0	0	0	0	0	0	0	0	0	0	0	0	0	0	0	0	0	0	0	0	0	0	0	0	0	0	0	0	230.41752058	0	0	0	0	0	0	0	0
RP11-486G15	1410.48464958	22428.8546535	3943.55374628	1601.70980233	7739.38237932	790.645087327	3408.51088124	5623.49496195	4166.20063974	5874.07165193	4762.76855889	3582.74602203	26054.8029125	3259.18705418	1952.21009216	4383.99451825	8844.47725886	3317.09834832	9767.15588723	467.04149471	4378.42449236	2253.03136705	2856.17430803	2366.96436444	5366.166794	1593.84365492	3050.59642973	13532.7072	2590.39759041	474.80776814	721.32763236	3545.71322868	6322.0629136	2848.19707701	5032.10166355	896.542020616	5269.25700639	7391.82981051	11192.0881827	2735.71626683	604.899961896	12204.8379669	5566.51721341	552.670360408	1218.84956954	8607.39024788	10471.7588982	1903.3304794	11352.852536
RP11-33E12	90309.9010559	40876.5193232	75197.2767922	57606.3812509	26546.4550399	179392.473871	75800.8551036	31835.9810258	182582.469154	25012.6432522	161242.365595	88037.1858855	59116.7342418	76228.1838768	22936.0240566	25957.6136696	56314.8670248	61550.6241512	68760.037941	52694.0858455	19264.8605754	103748.051896	31459.1921845	184389.243486	28657.1547278	69354.3228137	49067.6087648	32527.5383467	26267.3783617	88545.9798244	70622.4703774	17733.0717355	38412.2304542	67722.2304994	75409.3028435	83388.1983442	122264.774479	77142.3095347	23784.2674716	76356.7036573	123523.249703	51859.516603	54932.2095443	78330.4819721	24056.0111071	42269.6218661	49108.6351935	49988.5677033	45872.0481132
RP11-131L23	1322.3164538	955.765728439	1663.67050008	1769.72905006	1554.77146487	2779.58450771	1318.12220311	3389.12683384	4281.3302679	3028.78863599	2575.99150799	1185.45586427	1373.97033804	4010.28868206	1372.63432479	1078.86312178	1421.41997279	1632.61840973	4120.47867601	2955.46811475	481.023386876	2071.5771331	1129.62822805	3177.21519131	857.511182696	996.142562445	1787.44140097	1480.12540468	1821.35553019	1168.46083828	1352.47611115	1133.20694676	2724.45112795	4005.23805032	6570.87219546	157.593739021	1139.97236137	1998.97292771	2379.10889836	512.941793962	3686.07316848	2824.27236153	326.159934807	518.123406244	2570.98571914	2824.27236153	1732.44320402	669.133091241	760.228241424
RP11-290M5	4427.8155372	0	1237.966578	1436.60358181	0	3309.34061388	5350.02541262	3782.86362777	0	0	0	1323.17794262	4089.58230029	1705.2151875	1225.68170885	4128.69130807	0	0	0	1466.14398634	1718.10235595	1088.1156014	0	8105.90363094	0	0	0	3776.18548623	2032.95418738	1490.52399371	0	0	0	1788.22098835	24823.6253212	2814.43877452	1272.41032688	1784.9652378	1634.15715281	0	0	1939.93006552	2912.41635904	1156.63430982	0	0	1933.71234095	0	0
RP4-651E10	1442.00889143	1042.27900558	604.753788102	0	0	0	0	1231.96708184	0	0	0	0	1331.85630469	833.007419181	1197.50511784	0	4650.2489627	0	5991.27071856	0	0	0	1095.00360804	0	10473.4641693	543.155319609	0	0	0	2184.38861147	737.449258882	1977.25074159	1250.97302245	0	0	687.434758145	1243.15951477	871.965777087	0	559.37187014	0	3790.66794412	1422.73212942	565.022507672	1869.13616937	7039.81189623	1889.25918369	1945.86979407	8290.42004657
RP4-612B15	14882.2520137	18116.7830481	22337.5030827	10292.4200424	13354.0874271	9659.41771274	10789.1251297	20744.7360232	6940.77754861	12069.4548195	6713.92916759	10533.1022488	20618.1334494	27601.0637269	8456.05591014	9129.52032222	17260.6015088	8565.60396074	19526.1809475	11671.1774146	11625.3491879	13570.3074743	18438.4478515	10754.450707	10565.3230048	15341.7356873	28375.6787399	13527.0744395	23735.4276612	18193.3886017	16022.8309318	23628.2492367	17667.2277427	16607.5674516	16167.880081	12322.3216897	13505.2917109	17524.6066791	20813.8226331	8811.41661829	8733.80708078	33974.0093681	18547.3341492	21790.7015394	23013.1312758	45408.9843827	91846.3057261	9512.69125134	40529.0253681
RP4-604K5	0	0	0	491.064227027	0	0	731.50481513	0	6190.01701567	420.213972955	393.132216065	0	0	582.881867041	418.966267769	940.85458763	542.321259726	0	0	0	0	0	1149.31343846	0	2617.36322118	0	1091.15390617	0	1389.8212273	0	516.016773641	0	0	1222.51032716	4628.33862314	481.020031839	0	610.142272975	0	0	865.455620193	0	0	0	0	0	0	0	0
RP5-1052I5	0	270.27801337	313.642799195	363.968120578	1319.00693946	0	0	319.466873681	509.770126808	0	0	0	0	1080.05432889	0	523.00858597	200.979463366	0	0	0	0	0	141.975132488	342.276109602	387.988666269	281.696052495	808.743978143	239.177173122	0	0	191.231253421	0	973.186166499	0	0	0	483.553850007	452.226662334	0	0	160.365100016	614.359372464	368.935008224	0	161.564676339	228.190624058	0	0	1504.87803528
RP11-76N22	0	0	0	0	1202.51855486	0	0	0	37644.7230464	851.846803871	0	0	0	0	0	0	0	0	0	0	0	753.99314771	0	0	1061.17008859	0	1105.97936685	0	0	0	0	0	0	0	0	0	0	0	0	0	1754.42905615	0	0	0	0	0	0	0	0
RP11-60A14	3779.49269211	11103.4620595	5624.38654241	1068.02890193	5447.36620382	273.366328649	1856.1312656	10311.8877317	4321.40409732	406.19322815	2470.09797952	4590.61735196	3490.78372571	845.150384475	1113.71467227	1364.19343513	524.226316495	344.067020127	0	121.110047462	1986.92109191	898.832129438	555.482879879	4687.08713354	379.504949077	367.382023759	2900.55359702	1715.61391138	3526.55318219	123.123945059	872.899122758	4680.8384903	2432.6501632	3249.73104783	1864.1294746	116.242612164	210.213562264	4423.38324237	69519.1733374	3310.56821103	0	4006.17238992	1202.89305403	1146.51797475	842.836912137	1934.40895399	7187.99776885	822.598017901	8130.89592905
RP4-620F22	0	0	0	0	0	0	0	0	0	0	0	0	0	0	0	0	0	0	0	0	0	0	0	0	0	0	0	0	0	0	0	0	0	0	0	0	0	0	0	0	0	0	0	0	0	0	0	0	0
RP11-413E1	0	0	0	0	0	0	0	0	0	0	0	0	0	6124.36440581	0	0	0	0	0	0	1542.66232664	1954.01041097	0	0	0	0	0	0	0	0	0	0	0	0	0	0	0	0	0	0	0	3483.67723034	0	0	0	0	0	0	9142.81534713
RP5-943J3	9747.56513946	14873.8462984	9084.35906156	13704.5780538	5093.83399354	20641.7144765	12170.3455789	11566.3096532	15503.2464536	3608.39854762	1687.92306869	6796.75576283	23007.578121	25651.8342235	11692.4744311	10603.9050143	9313.87993681	10697.7614934	2249.95921949	9682.87898889	5358.25446981	11577.8631257	2467.30309379	10409.3798426	64616.860646	6527.24205665	22253.2596633	27017.3846479	12680.3689241	1093.76580833	3323.29651629	28216.3638203	9865.58724614	7217.20844938	6623.96280645	7744.76857018	7936.54498854	8513.89894002	13790.4053255	15124.7714873	14398.9400522	12100.1393295	8014.38314629	5516.89602455	6083.43311529	41638.7147517	2837.96631334	5846.00882017	18680.2845941
RP11-302M6	0	831.910765924	0	0	0	0	0	0	0	0	0	0	0	0	477.903418587	0	0	0	0	0	0	0	0	0	0	0	0	0	0	581.167612226	0	0	0	0	0	548.686458336	0	0	0	0	0	0	0	0	0	0	0	0	0
RP5-827O9	0	2355.2798308	0	0	0	0	0	0	0	0	0	0	0	0	0	0	0	0	0	0	0	0	0	0	0	0	0	0	0	0	0	0	0	0	0	0	0	0	0	0	0	0	0	0	0	0	0	0	0
RP4-665J23	12551.9142345	37406.5325205	31179.4173409	10619.7363289	9309.18417432	2164.90984233	13439.5712777	11301.0382107	7897.64442225	5951.12677348	7072.34569505	19389.4110012	4102.17208674	9816.57999166	27903.2824122	8012.71158173	12973.693553	5654.00179348	14642.3397897	1918.2489303	7361.87906624	18578.638751	12317.5264764	11754.3920662	10719.5057486	6546.28961396	6264.7574192	14698.3515366	11304.3309419	8873.16810519	8986.74055808	2912.61512525	17841.2886704	33456.8898616	24801.6257466	3314.07746923	5410.51851413	27557.5187304	29932.9965907	6142.47140314	1159.41745732	11675.4128623	16956.7186425	3329.25524787	4505.49087928	15555.130801	28462.4796209	7035.68211329	16875.1946684
RP4-621B10	2619.70524823	2103.90425721	6591.95660442	1416.60446002	684.496253966	3589.59799766	1055.10942012	2735.4814323	0	484.887275831	4082.73735291	5740.93446104	1344.21692005	6053.31609483	2900.68525063	542.828710265	3754.72538056	1232.17504772	1814.06224773	4626.34761349	677.673783088	1502.15494857	442.066421806	4262.96555997	2114.13313859	4604.84811566	5665.89893736	5957.78684603	3207.44512162	2645.59363153	3572.60801055	1197.3606579	5302.84851978	1410.66156854	0	10268.4570138	6022.5453987	4576.30298787	3545.09730366	903.301210249	1747.64472105	6312.64945915	6318.11901556	6386.98296375	3772.96628157	4263.08794644	9152.60597574	2356.71469258	2342.86116397
RP4-717I23	2227.00781457	12877.3879506	22415.2528324	0	10474.0077678	12483.4594163	8072.52355159	11415.7423086	0	3709.81803343	10412.1881604	7986.04438743	10284.4525303	7718.87348187	7397.60558001	4153.12143416	11969.5757324	10998.4382218	27758.3726191	11061.145459	6481.00740779	16418.3123288	1691.10024673	16307.7351155	13864.2813941	5033.02503259	12041.4321598	5697.79466857	6134.95050629	6747.0464804	9111.20741151	15268.1196318	7727.90435173	8094.60979933	27240.5571034	6369.95758139	11519.4544386	5386.58148686	32054.6210743	10366.5840076	9550.73805716	5854.22682495	13183.4231637	8726.08724866	11546.6163362	19026.2371811	11670.9265549	0	15364.2577431
RP5-1033H22	10208.4488204	15314.1403533	6139.14848556	3187.14254204	4076.50097615	3023.11821688	8238.60105761	4607.58210547	525.162367075	3208.5938979	4352.6214751	2072.12103604	6226.46230469	22920.9196006	2399.30017213	2694.00277267	2898.67105249	815.354317654	2400.80090718	6888.0254834	1457.39746929	3408.01815792	13602.3657	5465.46982281	3797.18590553	1596.10943971	6873.5995041	5667.17704113	4244.85828275	31706.0541446	4531.12374726	10828.3317225	5347.04538564	4200.58052023	9129.55979177	1285.51003391	6476.008547	7687.0432324	4051.94033027	3436.95940271	1156.45067775	6962.00592859	11402.2441897	1358.48297904	3994.63287784	3996.37223433	6308.81073366	1039.65612334	3100.63406859
RP11-488P3	4729.89271928	4232.73808012	2267.01240495	3507.68558575	4766.89581532	4040.12857709	1959.43480103	5195.49492862	1842.3110687	187.600014258	1755.09654808	2221.13353026	416.05564994	3122.65617819	3553.81680392	1470.12048372	2179.02150676	953.442451644	4211.09961637	3803.55127514	917.657901067	8136.44789917	1026.19727719	1236.9870891	1402.19243303	4411.5523625	153447.191149	7779.48446221	7445.64908842	909.835112857	1151.85072752	3088.34496443	4884.85875016	2728.88301633	12742.0110389	858.984904253	72621.0489975	1634.34878147	6234.44156143	1397.9275462	7147.90724972	5476.73254584	3333.33111111	146147.078501	2919.47660207	13194.9077552	5606.72429199	607.865967986	5179.65202191
RP4-561L24	5967.27122228	3388.88224805	3396.34658573	6015.67581399	7016.28040164	11229.4584534	11278.6775828	2549.04174238	6101.22099959	3017.64077294	6974.86896588	4776.47756751	5511.44160514	10587.5903346	3716.60563469	5564.14796898	5269.05332637	3007.17692846	3099.10860782	4657.45626463	2852.96441609	9741.28406464	4693.13834045	9558.63211293	3316.90763816	6261.35673647	16132.5189638	7088.3663006	5870.9322512	8393.69259199	4141.57516964	5259.97960589	13681.3663396	3614.92011801	1303.41283989	19913.0308537	9370.15645589	4123.81549843	6135.02940154	3306.81898316	15903.1145702	8403.43431554	3995.08982434	6012.40258446	4604.04435831	5462.2323051	9772.58360306	4888.91521873	12497.5969694
RP11-78O9	0	0	0	0	0	0	0	0	0	0	833.172253364	0	1975.08236093	0	2663.76848655	0	1149.35130612	0	0	0	0	0	0	978.695750895	0	0	0	0	0	0	0	0	0	0	0	0	0	0	0	0	0	702.673532256	0	0	0	0	0	0	0
RP11-148B18	0	2566.36623073	0	1727.99015737	0	0	0	0	0	1478.67747087	0	0	1639.69101662	0	2948.57392222	0	0	1252.5175603	3688.02277723	0	0	0	0	0	0	0	0	2271.05495045	0	0	1815.79487328	0	0	0	0	0	0	0	0	0	0	1166.70322337	0	0	0	0	0	0	0
RP11-86H7	0	501.215698677	0	0	203.835480511	194.353260373	0	0	236.335160125	0	135.088269546	0	0	0	0	0	0	122.309407086	0	0	201.803823476	0	131.642534177	0	0	0	187.471398895	221.770451172	0	0	0	237.707251753	0	0	0	0	0	0	0	0	743.470627204	0	171.042416296	0	0	0	0	701.803799519	0
RP4-639F20	79586.921563	60750.8591139	116976.832037	66606.1660658	54222.6548374	61289.838395	74413.9898301	42893.6364907	26870.9807604	20444.3232929	121425.799708	63347.7977472	17518.12181	52420.2020584	44782.1948464	27395.4171282	67162.0937143	50377.9395003	254954.618078	46918.0563216	26408.1839395	138186.380526	55634.1902317	61955.6962305	72931.3260883	21292.5472723	191032.799728	112278.084269	152652.360374	22534.6018812	37658.0067199	95869.3076961	86142.8429009	143287.39125	55157.4175638	230480.843319	41359.622236	57120.6514093	60118.2517777	26833.2675966	120896.111324	109494.866939	36692.9926658	199347.980552	40814.3982913	143886.590133	245573.824169	48177.5825694	208255.023885
RP11-313A24	343.398102794	496.413905943	576.061090126	0	0	0	1244.75956224	293.379022226	468.142000577	0	535.176337927	0	0	793.485169365	0	0	0	242.27529451	713.376668588	1023.35780068	399.740967853	0	260.762720527	314.325642623	0	0	742.701472628	0	0	0	0	0	595.810143906	0	2100.20718544	327.409620211	0	0	0	0	1472.69592305	451.352341887	1355.23024007	269.107435223	0	0	0	0	394.853947473
RP11-57H12	2554.16904242	2823.51510255	2394.39044726	1608.65191496	5476.37990972	2021.27390788	1198.14940378	1026.88513648	2048.23805442	375.424699191	1756.1475041	2020.4214094	971.377831805	1735.84779566	1622.00992608	840.571883081	1292.04522078	1272.01783369	624.240182653	2835.71561429	1224.27652909	1218.42884708	1483.17255172	1650.30373324	2650.17168631	1697.76692716	7798.81019402	3267.4179806	2690.31661922	2427.67979814	1229.37648906	1442.09066063	2085.45442785	2730.51707802	2067.50934902	1718.99853294	906.687598198	3634.06096319	2994.32388479	2098.14694285	1804.15538868	5331.90359326	1334.13084711	2237.08312618	1817.65098147	3850.8192618	6102.19403402	810.973279444	6737.57969293
RP4-586O15	0	0	0	0	0	0	0	0	0	0	0	0	0	0	0	0	0	0	0	0	0	0	0	0	0	0	0	0	0	0	0	0	0	0	0	939.374198303	849.38385695	0	1090.86406797	0	0	0	0	0	0	0	0	0	0
RP11-14O19	0	0	0	0	0	0	0	0	0	356.632109015	333.648046854	0	0	0	0	0	0	0	0	425.331873169	0	0	0	0	0	0	9260.53258249	0	0	0	0	0	371.449327486	0	0	0	0	0	0	0	0	0	0	0	0	0	0	0	0
RP11-286B14	0	0	1099.93546129	0	15419.053247	0	0	0	1787.74784889	0	28612.354457	0	0	0	0	0	0	0	0	0	763.268468235	1933.58521503	0	0	1360.66408571	0	15599.3187352	0	1806.28333722	0	0	8990.63490515	0	0	0	0	0	0	1451.95147723	0	0	0	1293.84350445	0	2266.40901374	0	6872.42713509	0	0
RP11-147C23	0	0	0	0	219.507355252	0	0	159.495738274	0	0	0	0	0	431.378842076	0	0	200.680386783	263.426312285	0	0	0	0	0	0	0	0	403.77024504	238.82125471	0	0	0	0	0	0	0	0	0	0	413.402851157	0	0	490.756117766	184.192998898	0	0	0	1956.73272596	0	0
RP5-898J17	0	0	0	0	0	0	0	0	0	0	0	0	0	0	0	0	0	0	0	0	0	0	0	0	0	0	0	0	0	0	0	0	0	0	0	0	0	0	0	0	0	0	0	0	0	0	0	0	0
RP11-272L13	300.850775909	0	252.343307266	0	0	0	0	0	0	0	0	0	277.869300979	0	0	0	0	212.257172488	0	0	0	0	0	275.380419117	0	0	650.680107115	0	0	0	0	412.519938893	0	0	0	286.843280377	0	0	0	0	0	790.858779709	0	0	519.951548315	367.184433436	0	405.972834734	0
MIR137HG	0	1719.56270833	66.5152712578	0	0	0	57.4907914125	1219.50723778	432.434582918	0	123.588973108	0	0	0	197.565635749	0	85.2447660673	0	164.741009012	0	46.1563527989	58.4638597466	0	145.175265198	0	0	0	405.784786763	0	0	0	2500.93472435	0	0	121.250899454	0	0	191.810423784	0	61.5238340103	0	104.231387844	0	0	3974.57273943	0	0	0	0
RP11-490G2	0	0	0	0	0	0	0	710.593167647	0	0	0	0	0	0	0	0	223.520254008	0	0	0	0	0	0	0	0	0	0	266.002016295	0	0	0	1140.46948852	0	251.931686204	0	0	0	0	0	0	0	273.305064479	0	0	1257.79439464	0	0	0	0
RP5-1070A16	0	0	0	0	0	0	0	0	0	0	0	0	0	0	0	0	0	0	0	0	0	0	0	0	0	0	0	0	0	0	0	0	0	0	0	0	0	0	0	0	0	0	0	0	0	0	0	0	0
RP11-296E3	560.065953367	809.627441836	7046.46154887	1090.27950405	658.522065757	1883.66485835	2030.14357175	1913.94885929	763.517310464	0	2618.54136772	2008.39509148	0	1294.13652623	1860.40973664	1566.69089815	1806.12348105	395.139468427	1163.48337615	0	651.958483284	3303.20807568	1701.16631963	512.65015523	581.116953274	1687.66117164	3633.93220536	2149.39129239	5400.03456022	565.600622613	572.84004931	767.950064815	971.737972799	4749.9620003	11132.3482062	0	1448.50282748	0	4960.83421388	1303.53623309	0	2944.53670659	2210.31598677	2194.50706105	1935.89103257	1367.10632806	733.774772236	755.761928946	7083.86784336
RP5-896L10	0	0	0	0	0	0	107.252867942	0	0	0	0	0	0	0	122.857246759	0	0	104.376463358	0	0	86.1077242073	0	0	0	0	0	0	189.254579204	0	0	0	0	0	0	0	0	0	0	0	0	0	0	0	0	0	0	0	0	0
RP11-413P11	0	0	0	0	0	0	0	727.47377457	0	0	0	0	0	0	707.124062795	0	915.320497184	0	0	0	0	0	0	0	0	0	0	0	1172.85818503	0	0	3502.68626848	1477.39347901	0	0	0	734.082880894	0	0	0	0	559.595211208	1680.24020714	2001.86707469	0	3117.74474816	1115.60327363	0	0
RP5-884G6	17812.6625046	16612.813463	21688.0404313	49776.6691438	35131.9008639	43160.369762	42489.8201473	10799.9312732	61100.0356417	17708.0092847	24178.5315908	28332.1689241	9022.05560903	53772.8545004	7157.6069257	12323.0404691	21000.6663079	14999.6148748	60877.7133853	40526.0104925	24079.6635536	48716.0152841	17889.5169612	26823.7345344	42926.3552171	39390.7847207	39767.9786993	27932.2422607	11871.8317049	70794.2006783	39376.4127941	11818.2238982	16449.8177747	18796.7961905	22842.5587619	26296.7409162	17833.1706882	16677.8431379	15268.766069	22735.2640105	24149.5150691	21901.958526	27212.195599	11257.3186643	17378.6859107	20337.532917	29359.9530241	18609.0509772	37660.0241321
RP4-714D9	0	1416.84802321	0	0	0	0	0	0	0	0	0	0	905.246082095	0	0	0	0	0	0	973.611240926	570.463672873	0	744.260264838	0	0	0	0	0	0	0	0	0	0	0	0	0	0	0	0	0	0	644.117404568	0	0	0	0	0	0	0
RP11-305E17	3189.52814121	0	0	3104.52468951	1875.11367877	0	5780.74779754	1362.47206932	0	1328.30349078	2485.39519648	5718.81992151	0	0	1324.35947354	1487.02864909	5142.86008163	1125.14289315	0	0	928.212077896	0	1210.99975296	1459.74959455	0	3604.15775639	3449.15599153	2040.10020972	0	1610.52380676	0	2186.7052693	1383.4913511	0	12191.8806951	0	0	1928.67006627	5297.1619572	0	0	3144.16631382	0	2499.5063475	2756.18384297	0	0	0	9168.64250913
RP5-837M10	0	0	0	0	0	0	0	688.529782356	0	0	0	0	0	0	669.269455579	0	866.320470568	0	0	0	0	0	0	0	0	0	0	0	0	0	0	0	0	0	0	0	0	0	0	0	0	529.63829412	795.145793957	0	0	0	0	0	0
RP11-84O12	0	0	403.169192068	467.859404038	565.168362949	0	0	410.655693947	0	0	0	430.920019628	443.952101564	0	0	0	0	0	0	0	0	0	1095.00360804	0	997.472778033	0	519.796177523	0	0	0	0	659.083580531	416.991007485	0	0	0	0	581.310518058	0	0	0	0	0	0	0	586.650991352	629.75306123	0	0
RP4-549L20	0	0	0	0	0	0	0	0	0	0	0	0	0	0	0	0	0	0	0	0	0	0	0	0	0	0	0	0	0	0	0	0	0	0	0	0	0	0	0	0	0	0	0	0	0	0	0	0	0
RP11-421L21	3365.40376151	8108.3404011	2822.78519275	4913.56962781	8573.54510649	5030.59228936	4472.97206629	3833.60248417	1529.31038042	4204.64473088	7430.25747263	8548.39997209	5698.59828729	9072.4563627	3726.36465878	7322.12020359	8441.13746136	4353.0118489	3495.65199153	18944.0661126	6855.76610738	3721.6472507	2129.62698731	7187.79830165	2909.91499702	8873.42565358	7885.25378689	3587.65759683	3862.91592982	2832.21772277	3442.16256158	11536.4182613	6325.71008225	14950.7000665	3430.44273508	3208.71186663	4351.98465007	3391.69996751	4968.22740943	3481.27709345	9140.81070091	4423.38748174	4980.62261103	6153.77717744	2423.47014509	10268.5780826	1469.73665259	1513.7765015	3869.68637643
RP4-575N6	1907.25162498	3676.14622239	1066.49147767	4950.45828868	0	0	1382.6923786	4345.18119406	866.695325392	2118.10556638	1486.19915465	2849.74979197	4697.49318276	9548.62896378	2111.81645781	2964.00980732	683.398073911	3139.75685723	3962.13257824	1263.06323147	2960.2439241	937.396886343	965.52683006	1745.7816097	3298.23135642	1915.72349213	3437.5034375	4879.69915028	9632.49408039	642.033139183	2601.00346714	1743.4542012	5515.26957535	6162.11286526	3888.22141088	3636.90145694	2740.41075469	5382.03200925	3519.51075985	6905.21896449	545.295517453	17130.0412458	2509.00733634	1992.84965544	1648.12344664	3103.7008529	22489.2051815	1715.78383869	12427.2276171
RP11-411H5	0	0	660.421500814	0	0	0	0	0	0	0	0	0	0	0	0	0	0	6110.60868329	0	0	0	0	0	0	0	0	851.465286612	0	0	0	0	0	0	0	0	0	0	0	0	0	0	0	0	0	680.396848266	0	0	0	0
RP11-202K23	0	0	0	0	0	0	0	0	0	0	0	0	0	0	0	0	0	0	0	0	0	0	0	0	0	0	0	0	0	0	0	0	0	0	0	0	0	0	10148.190538	0	0	0	0	0	0	0	1501.05524184	0	0
RP5-936J12	0	0	0	0	0	0	0	0	0	0	0	0	0	0	0	0	0	0	0	0	0	0	0	0	0	0	0	0	0	0	0	0	0	0	0	0	0	0	0	0	0	0	0	0	0	0	0	0	0
RP11-153F1	1179.82545662	1705.54746368	0	574.191086774	1387.23143633	0	855.333216438	2015.94613392	0	491.347372766	919.362486471	1586.56916318	1089.70061293	0	2939.33074378	1650.18226263	0	0	0	0	0	434.905138491	895.912042939	0	0	444.399806953	1913.79501724	754.645218643	4062.72192619	0	0	1617.75060676	1023.52338201	2144.18347349	0	562.4466203	1017.13051208	1426.85308978	3918.90351692	0	505.979539705	1550.72779532	1164.05356043	0	509.764409829	5759.84609691	16230.4538962	2388.11292908	8817.99223135
RP11-251P6	0	0	0	0	0	0	0	0	0	0	0	112.582707831	0	0	104.287232484	0	0	0	0	0	0	0	0	0	260.600996063	0	0	0	0	0	0	0	108.94359655	0	0	0	0	0	0	0	0	0	0	0	0	0	0	0	0
RP11-24P14	0	0	0	0	0	0	0	0	0	0	0	0	0	0	0	0	0	0	0	0	0	0	0	0	0	0	0	0	0	0	0	0	0	0	0	0	0	0	0	0	0	0	0	0	0	0	0	0	0
RP5-947P14	0	0	0	0	0	0	0	0	0	0	0	0	0	0	0	0	0	0	0	0	378.338601698	479.22189699	0	0	1348.91396408	0	0	0	0	0	0	0	0	0	0	619.759833768	560.387967798	0	0	0	0	427.186672459	641.335208597	0	0	0	0	0	747.42647052
RP11-233E12	0	0	0	0	0	0	0	0	0	0	0	0	0	0	0	0	0	0	0	0	0	0	183.320039575	0	0	0	0	0	0	0	0	0	0	0	369.119158955	0	0	0	0	187.294494043	0	0	0	0	0	0	316.290344415	325.767810296	0
RP11-356N1	1850.97206883	1783.83488824	2070.04247468	600.547398954	1450.90763341	4841.94507851	447.297206629	4744.08307417	5887.84496463	1027.80204533	4327.03229288	1659.3952887	2849.29914364	2138.50757121	4099.00112466	2301.23777827	8622.01897839	3047.10829423	7690.43438137	612.896256583	718.223116011	4093.81197576	937.035874418	5082.8002276	0	4183.18637955	0	3157.13868521	849.841504559	623.08789901	1893.18940887	10998.0520758	8028.78587362	747.535003327	2830.11525644	588.263842216	2659.54617504	2238.52197855	4781.91888158	2872.05360209	1058.4096601	4054.77185826	1217.48552714	1450.53319183	0	753.029059391	4850.13095354	2497.73122747	0
RP11-483I13	1130.22318517	466.812218716	1218.84740305	2671.67590183	1139.06519482	5611.39801646	4682.13292224	1517.36486142	5062.60126578	1210.34603793	2893.76343339	1592.24115361	1938.64798019	2984.67523166	938.585092359	1957.18742832	2082.73698716	2620.02386272	3018.76767866	3849.33556258	1973.4959494	2975.86313125	2942.55795828	5763.85039394	2512.93817632	10460.4584332	21127.005254	3924.41413144	1779.16196579	3098.06467161	1321.14461823	1106.95504838	1680.84406106	978.113153216	246.871200691	9390.51804756	974.368268333	1757.3982071	2145.225606	1377.91217432	4431.60801485	3077.17349518	2070.92669031	1644.89177909	1953.33149232	1970.60371613	1692.30938462	653.631938548	2227.85032912
RP11-131J3	0	219.294494524	0	0	0	0	0	0	413.610344726	0	118.209041993	0	0	0	0	0	0	0	0	150.691945391	88.2942565028	0	115.193849939	0	0	457.117415294	656.18767755	0	0	0	0	0	0	0	0	1012.44925686	0	0	0	0	0	99.6941085667	0	0	0	0	0	0	0
RP11-293A10	0	0	0	0	1146.44256008	0	0	0	0	0	0	0	0	0	0	0	0	0	0	0	0	0	0	0	0	0	0	0	0	0	0	0	0	0	0	0	0	0	0	0	0	0	0	0	0	0	0	0	0
RP11-475E11	505.866022396	0	0	0	0	0	0	0	0	0	394.189023097	0	0	0	0	0	0	0	0	0	0	0	384.134330239	0	0	381.084780693	0	0	0	0	0	0	0	0	0	482.31309644	0	611.782440376	0	0	1301.67317069	332.44769268	0	0	874.273369546	1852.2085735	0	0	0
RP5-1065J22	0	0	0	1294.46612495	1563.69903954	0	0	1136.19578926	0	0	1036.31319146	0	0	0	1104.41284719	0	0	0	0	0	0	0	0	0	0	0	1438.16398233	1701.28498055	1831.81384375	0	0	0	0	0	0	0	0	0	0	1031.77426224	1140.6888563	1747.99352194	0	0	0	0	0	0	0
SCARNA2	440.707635436	0	0	857.92485565	0	0	0	0	2403.20202638	367.072159045	0	0	407.042734806	0	0	0	473.737306505	0	0	0	0	0	0	403.39684346	0	0	0	1127.54953043	0	445.062785007	0	0	0	0	2695.34786328	0	0	0	487.9509062835	341.9111431065	2268.020700225	579.25312261	0	0	0	0	0	1189.395822605	0
RP5-1160K1	0	0	0	0	0	0	0	0	0	0	0	0	0	0	0	0	0	0	0	0	0	0	0	0	0	0	0	0	0	0	0	0	0	0	0	0	0	0	0	0	0	0	0	0	0	0	0	0	0
AC000032	766.526111329	2216.16961676	0	1492.19516644	0	1718.70031882	0	2619.49823511	0	3830.70823411	0	0	0	885.600555626	636.555673637	0	24719.2460136	0	0	6852.95407055	892.29348425	0	582.069127694	9822.83637558	0	2887.24110831	1657.84279837	45106.5740871	0	0	0	0	0	0	0	4385.02171591	1321.64820104	0	0	1784.06588317	0	503.749660599	18906.9799276	5406.26423837	0	0	0	0	6169.69345217
RP4-735C1	1863.18970625	0	0	6347.36978598	0	9399.67414463	4389.93421852	397.949762822	8890.06294165	4267.66814612	8348.22099411	417.587098229	430.215959808	3228.9346991	1547.27146414	3040.31104988	2002.82999879	0	967.64954056	49972.2838907	0	2747.22255799	0	4263.6250534	6282.9674552	2105.39908541	4533.420375	4766.96682668	16681.2948791	0	0	638.691143014	2828.62340597	1128.70384166	0	2220.5503945	0	6759.89310356	515.730289562	11925.4205879	26768.0710449	8265.11045861	459.570650715	10585.7805955	0	7958.99525644	610.268127404	0	3749.15777848
RP11-195M16	836.365157028	1209.04364648	0	2442.22608908	0	1875.29301453	6063.3621343	0	1140.18585029	0	651.725851521	0	0	5797.7316375	694.552968346	0	0	2950.37469759	0	8308.1492559	486.795667519	0	5080.81674129	0	6074.60921822	6930.66187821	0	0	0	0	0	9174.44344099	1451.12870605	0	0	797.424319448	721.032518567	1011.48030142	2778.06715977	1297.74273872	1434.73309481	549.646851898	825.184635062	1310.8522178	0	2041.54544991	0	0	5770.13235241
RP4-773N10	33387.1574781	45167.0717078	35641.4571246	27718.33927	40201.0851984	44035.5807492	41095.9613348	42328.4135768	22027.5468469	23273.0365885	36242.2025353	26970.4213708	29764.9034356	25165.675751	68573.9262509	37624.3643397	51243.1846085	14863.8421672	35606.5652572	41767.3679978	30395.8632529	23561.2128207	27928.8254221	42572.3366101	91143.8385005	74580.5332569	17473.2148167	50361.8286117	43405.2113797	36241.3696858	21548.3513046	29989.397218	59786.7780456	36449.4237746	11601.9509841	69453.0858874	23088.0906087	64345.1178466	55152.8039073	24448.1065045	91193.6909586	68816.6723848	48530.4863054	29801.98887	16739.7636345	75940.5515136	53333.0339198	21081.0253425	47628.2271973
RP5-1028L10	0	0	0	0	0	0	1074.21770096	632.959465276	0	1851.25762101	0	1328.3873046	0	855.96431656	6152.53613692	1381.64866609	0	1568.11253612	1539.09611963	735.958103377	1293.64990384	546.199760546	5063.31392771	0	0	6139.365837	2403.54571063	0	0	0	0	10158.7095188	0	0	0	0	0	0	3281.18168477	574.78763034	0	1460.6756891	0	580.593994103	0	0	0	999.748063488	0
RP5-1074L1	29845.0303402	45816.3908138	28355.9502497	34062.6270319	11024.3525619	46339.4773854	39922.4527895	16923.3372821	19623.1985814	17158.8846725	42396.4817094	31728.4142452	30004.6196137	28988.6581875	36189.8651928	9235.23055753	49826.1938856	21522.2070045	26062.0276257	20464.2834303	16064.2570281	46731.7016181	22562.8375024	41944.4960692	13976.1685773	69638.2293983	56980.0569801	45612.3457416	12732.7130683	14136.4433509	11075.711606	24445.0631158	42731.9216333	17119.8630411	26854.6492111	119865.466123	55785.1474891	40725.3910835	55561.3431955	20798.0349443	198446.240693	37838.8464359	55374.2320897	22043.0149256	13237.4191027	24659.7200396	17474.6531022	59697.236998	34924.4852909
RP11-470L19	0	0	0	0	0	0	0	0	0	0	0	0	0	0	0	0	0	0	0	0	0	0	0	0	0	0	0	0	0	0	0	0	0	0	0	0	0	0	0	0	0	0	0	0	0	0	0	0	0
RP11-284N8	12325.6341728	105344.136161	21674.1950865	20731.9106384	1906.89526654	6303.05322322	26650.2271344	43968.5901693	16508.2926903	20892.6379567	13311.608171	30920.3992366	27461.645007	133909.113374	39685.8906647	36999.2890995	9181.60330958	55913.8807239	1347.64865632	537.010509215	20955.5675891	5818.80836544	6321.82921882	30877.4151526	4487.33803619	17430.2770591	20110.3332387	28768.8707541	19955.7726466	17797.6529154	4865.76689974	31132.7529867	17070.8763323	17946.423507	2149.07727507	30100.9926962	5406.19038626	7714.68026508	96007.3195406	22480.2893264	927.3626726	20676.890335	21441.5254931	8218.71578668	94924.8401513	6202.05203469	8215.91655349	28887.8653312	26728.9239249
RP11-96K19	2829.80692227	1181.77198528	1107.65430663	1591.42552171	1256.96843429	1903.49290949	1458.85404735	1504.2966473	943.010853626	2618.87739202	2842.11273595	1127.52005136	2439.39996859	4068.58360526	1201.10663699	1348.63684332	2568.70895083	1597.19532501	4049.73862856	874.542026937	2305.87421456	1112.65956234	2053.33759282	1151.21438368	587.233973834	14164.5106055	2448.12274887	1287.12086749	2165.42739257	127.012069639	2508.43642645	5949.59208109	763.751950551	990.46826673	4999.79147504	2817.96564016	2005.87993887	1597.07416014	1531.76635376	2683.30265526	1779.93203491	1818.38056267	3846.72536645	1133.44364697	1684.56482834	690.748460494	164.777492713	1442.5771556	867.689075551
RP5-1180E21	0	0	0	0	0	0	0	0	0	0	0	0	0	0	0	0	0	0	0	0	0	0	0	0	0	0	0	0	0	0	0	0	0	0	0	0	0	0	0	0	0	0	0	0	0	0	0	0	0
RP5-1125M8	0	0	0	0	0	0	0	0	0	0	0	0	0	0	0	0	0	0	0	0	0	0	0	0	0	0	0	0	0	0	0	0	0	0	0	0	0	0	0	0	0	0	0	0	0	0	0	0	0
RP11-552M11	9116.09081189	4034.12981399	21222.2841942	10865.0691061	5249.94754154	12097.1694709	7552.97705311	4927.25934709	2789.87640087	3564.02933661	20440.9319224	7338.63396749	3436.62378175	12681.6423608	4943.92622055	6592.02813894	8799.38360318	2362.63322298	5024.31575583	3696.16131009	4331.35047718	6995.02886615	4379.47315503	7152.26790965	8879.62790884	6587.13426163	5432.03706822	10947.764645	14094.0101226	6575.84114872	6850.29484573	2040.78079508	13073.0700285	6987.58621498	284.45712744	21463.051999	12349.8649374	13724.7327108	9681.35119941	4041.41337319	25052.8653357	23963.8419858	4221.78001626	13413.0701475	3858.38489536	17710.8861324	12431.0079061	8033.56624818	8128.95561264
RP11-88H9	2201.57402059	1212.41145608	967.269150775	2040.85745606	123.266525958	352.596875992	1444.05978408	1343.49613521	571.680927724	87.3202294776	3186.01356384	3759.44707932	1646.08535485	4966.02361708	87.060957035	1270.80888452	2817.35139105	1627.22615633	217.788531691	14267.3370927	1098.34119969	2241.39690038	4378.48935748	3070.76014988	7940.74464061	3474.98367153	94891.1812422	4023.37311555	1010.81426865	8363.9570622	965.051982793	0	2364.65262684	381.055447378	1923.53237485	16792.5566992	1265.32168996	2662.53171265	812.526606619	732.013661815	89.9205978641	2893.68398353	930.918599443	5422.32741903	2083.64427572	2814.9442833	5906.1715372	707.342641019	10246.4049433
RP5-965F6	10320.7766178	15914.2856574	577.114218262	16073.1515918	809.006998517	1542.74562439	4489.32662595	7053.96873916	3751.98268835	0	1072.30944491	7402.05576678	2541.97071682	11129.1009495	1142.77453658	10906.6891045	13313.1441967	1456.30926572	0	683.485770595	800.943511456	1014.51363202	1044.9577393	5038.40445067	4283.47999195	2073.32414505	13393.0664095	9682.08435912	12320.3713549	1389.70244386	703.744996593	0	17906.9812903	21674.4152701	0	3936.09810331	1779.51352846	9153.2495284	3809.05003625	4804.25785359	0	42956.8609116	8825.10075889	3774.39166916	2378.27929412	36109.601879	76623.7934006	1856.93607405	24525.6996698
RP4-671G15	2926.62768789	4230.71260431	9328.06853872	569.726148308	8946.88766167	7874.48077642	5092.09261668	2500.33754557	0	6825.37283599	10490.4549973	5772.18371549	5406.13523366	13525.0349242	6319.02778355	7095.18490734	5033.55097674	2477.76413172	8511.70420126	1744.32371625	1022.04378095	5609.80282838	4889.19962469	9108.11100055	9109.88940746	4850.38545131	6329.71083982	6738.9935388	806.22599966	5319.98843789	1796.02727746	3210.34179506	7616.73309939	11346.7210458	21478.9462697	5022.65706651	7569.15940952	2831.51561829	7128.7882016	4995.19949975	5522.49519386	5770.00972054	9240.01457612	5963.05246821	1517.40136923	5715.05724701	14570.5074524	2369.5428441	5384.26035995
RP11-426L16	2514.68365699	12117.3639402	4218.46072235	1631.77689694	0	11276.8176821	12761.4191914	716.132312606	6856.35143829	3490.86440784	7838.12828109	2254.41230759	6967.77385238	968.440696687	10441.4978538	8597.60884866	14416.8074746	6505.28051361	1741.33814871	0	4878.79844952	3089.86056077	8911.23203512	7672.62593129	8697.34059242	27152.9271803	7251.6776303	4289.20845875	6927.43854496	5079.06839727	1714.69270885	18389.7529998	14543.6061853	3046.74622737	3844.92273147	17582.4070435	7949.02219801	7096.13129059	16705.5263505	9754.74775767	6470.67821155	12119.1622133	4135.11231379	656.885855244	2173.02690515	1023.04616087	4392.84317989	10180.0626866	0
RP3-522D1	0	27901.0072264	24283.1905684	2348.29431642	2836.71043711	0	0	4122.35138923	9866.99293523	2009.48476811	1879.97841785	0	8913.19219293	8362.1129387	6010.55453376	2249.6074435	0	1702.13924861	5011.92838957	0	0	0	1832.02526729	4416.67826045	2503.27302949	3634.96252354	0	3086.30544548	0	0	0	6616.18517379	2092.97409526	0	0	2300.26245995	2079.90149587	0	0	0	0	0	0	0	2084.80572738	0	0	0	0
RP11-31F15	2295.83766163	4203.87278461	3594.58371976	4171.34996915	1619.6589889	2230.67591196	2441.12586944	4184.37944999	2712.52022132	4206.92459789	834.866381574	3155.9327505	565.456682431	1768.31993824	2287.87273022	1855.30861953	3290.53810293	1295.81320593	3179.5885676	456.120434952	979.926211556	1692.57510181	1162.24457787	2381.66546293	2540.93919544	1498.92313903	4468.89426149	3720.13393265	2740.64381096	2627.66226626	626.187089282	1469.06754977	5443.9456337	2410.71678584	2106.18581508	2334.87397317	1583.39796676	4442.45110018	6100.67615404	1781.16378332	1837.90534715	10963.8788473	4228.27425855	1199.43777554	0	5790.88227454	26870.6590851	1652.28797479	10559.412601
RP5-1073O3	0	503.768186032	0	678.396135856	409.747063138	0	0	1190.90151244	0	0	814.657314401	312.417014231	643.730547268	805.240505208	868.191210432	1299.77318958	374.603388662	491.729116264	0	0	405.663056265	0	264.625871942	0	0	1050.10028458	1884.26114352	891.599350916	480.00307202	0	712.867616919	1433.50678765	2116.22936298	422.218844471	0	332.260133103	300.430216069	842.900251184	3472.58394972	1081.45228227	896.708184256	916.078086496	687.653862552	273.094212041	903.415815197	0	1826.28387757	940.5037338	801.407271168
RP4-590F24	0	0	0	0	0	0	0	569.103377629	0	0	0	0	0	0	0	621.130550772	0	0	1383.8244757	0	0	0	0	0	0	0	0	852.148052203	0	672.714368843	0	0	0	0	0	0	0	805.603779893	0	0	0	0	0	0	0	813.004825184	0	0	765.946772444
RP4-543J13	0	0	0	0	0	0	0	0	0	1888.43146882	0	0	0	0	0	0	0	0	0	0	0	0	0	0	0	0	0	0	0	0	0	0	0	0	0	0	0	0	0	0	0	0	0	0	0	0	0	1529.73498871	0
RP4-666F24	766.526111329	1108.08480838	0	2238.29274967	0	0	2222.82114903	0	1044.97684854	638.451372351	1194.60950381	1374.38034774	1415.94499195	1771.20111125	636.555673637	0	0	1081.60375879	0	0	0	565.110953885	0	0	0	1154.89644332	828.921399186	0	0	0	1568.01838345	0	0	0	41020.3399356	4385.02171591	1982.47230156	0	0	0	0	1007.4993212	1512.55839421	0	0	1871.07016794	2008.54031341	0	1762.76955776
RP4-663N10	0	0	0	0	0	0	0	0	0	0	0	0	0	0	0	0	0	0	0	0	0	0	0	0	0	0	0	0	0	0	0	0	0	0	0	0	0	0	0	0	0	0	0	0	0	1157.04716934	0	0	0
RP11-12L8	0	2680.14601435	0	0	0	10392.6337012	0	0	0	0	0	0	0	4284.03815579	0	0	0	0	0	1841.70796313	1079.10369647	2733.68944194	2815.72356352	0	0	1396.68510757	2004.9281133	0	0	1872.33309555	0	0	0	0	0	0	0	0	0	0	7951.10705251	0	3658.45404707	0	0	0	0	0	0
RP11-159M11	533.85010023	0	0	0	0	0	1161.06934487	0	0	0	0	0	493.070206418	0	0	0	0	0	0	0	0	0	0	0	0	402.166066434	1154.61108369	0	0	539.125699853	0	0	0	0	816.250735901	0	0	0	591.078119101	0	1373.68062269	0	526.713596848	418.357090787	0	0	0	0	0
RP5-1185H19	0	595.262189184	0	0	0	0	0	703.596079563	561.360648394	0	641.743179834	1107.47387977	0	0	683.914301435	0	885.277154825	0	0	0	1198.34819685	303.5771098	0	1130.74695071	1281.76343304	0	445.29585011	526.765480847	0	415.846409624	0	564.619741308	1071.67601377	0	0	0	0	0	0	0	0	270.613876755	0	0	355.831174476	1507.70588478	1078.98609834	0	0
RP4-655J12	663.781870657	959.558449584	1113.51491143	646.091557958	0	2480.54631552	802.032028347	1701.28787492	2413.09174665	7924.52899733	1724.14246434	1190.16005421	22683.8383323	1533.79143849	2021.18588672	3919.9508892	2140.59079236	10459.0002507	1378.94326062	219.792308357	4378.58536921	1631.21386453	336.03285326	1012.64228194	2066.19361164	1166.77809397	1674.89879424	6793.13791174	304.763855251	223.447159551	452.614359949	1516.93839963	2495.32714003	0	8457.62446811	1687.67051735	2479.74146597	3746.2233386	4409.63041234	1201.61364697	3605.81068801	3199.00284173	4802.66189719	346.786301005	1338.39380029	1890.31986102	869.658989317	1492.86306952	1780.90504704
RP5-1086K13	3433.38433272	7563.087971	4936.80850826	1909.64681162	4805.89518016	3482.57065036	3081.72619337	6984.00105039	3120.40436874	4221.48928695	3439.82150129	4983.47209494	17063.6133772	5288.98194559	10726.0460576	7012.67724351	4920.94112648	5536.75877219	7811.81540476	1461.68568577	2854.79648632	1205.3409138	4841.89475509	4489.5860684	1357.11761112	2832.80745753	4950.48279583	6274.50455466	3152.7569283	1320.88138452	2173.90559113	8294.66134299	13190.64647	3169.39254234	2999.77464193	2338.2337777	4933.21553754	3559.07490943	16653.921288	1648.95634699	560.929533157	5157.41616029	5161.88477189	2434.3584844	7064.06805975	2993.14330731	8996.55046551	10148.615442	1503.94414051
C1orf137	0	0	0	0	1146.44256008	0	706.8686426	833.014011296	1329.23220889	4060.61688892	0	0	7204.4455031	0	0	0	0	0	0	0	1135.0158051	2156.49853646	0	0	1011.68547306	0	0	0	0	0	1994.55188154	0	0	0	5963.28257834	0	0	0	0	0	0	0	962.002812896	0	0	0	1277.45245322	1315.73061205	0
RP4-753F5	0	2841.09473062	3296.93448971	1912.97082696	2310.84505582	4406.69376783	0	3358.15570089	1339.64394943	3273.93863002	1531.47066937	0	4538.04824444	3405.97811602	1632.1088029	916.289193698	0	693.299537292	6124.2362567	3904.61322732	2287.81253664	4346.7803398	2984.81401251	2698.44050377	6117.6594141	740.279573984	6375.98548826	3771.25574017	2707.06693358	8931.46883959	1005.08750166	0	1704.98150841	7143.54598479	7512.49045444	936.921524156	3388.66457812	5942.11665326	2176.03171784	4574.28902683	1685.71773542	3228.99586624	969.538082971	0	1698.32738105	9594.73057397	0	2652.07319192	11299.2147893
RP11-27K13	5802.12210682	4752.92080963	5515.50371595	2447.24608104	1364.4198197	4553.31936982	5187.82012005	6278.85381176	2372.94588576	9504.26403168	3014.14833694	5028.21217148	8038.36192117	1787.58426644	5781.99285057	1983.72372716	4157.98211465	1500.96143402	5624.89804872	9798.15135781	4953.00833344	3136.85946756	5727.6678963	2832.48431091	2608.75524347	7139.17099946	5228.67943217	6185.29868313	3196.73166155	5273.51371875	9692.9481725	10077.272793	4026.77030455	2343.24949655	7688.52825749	4425.5820401	4335.08759878	2806.77987034	8137.19568896	2400.75737893	9953.18436789	2796.2506854	5152.10345118	6214.08618149	4846.69121822	4484.89557983	2027.11879524	8090.45863505	4447.68680813
RP11-188D8	1963.63993389	8515.87264039	6588.1351803	1274.20491604	8465.73062622	13942.3958907	10439.5278486	3914.44149308	7138.55488879	2725.90977239	7650.69477872	5868.00652816	15113.6737185	10587.1621206	4892.06873357	3051.64140162	14072.0577306	7850.5622388	8158.5477785	11703.6537344	11810.0861946	7720.88983255	15905.165451	5392.18806754	0	12820.3547787	30436.5521757	21770.530238	3606.28394978	90559.0534265	4016.85405012	11667.4987239	13627.9913264	1586.07426793	12009.5325665	25586.9194675	17492.8758852	6332.74623498	3623.56586057	5078.12376022	20211.0227269	8603.16811666	8395.35672194	4103.53737745	3959.31800747	12781.8497733	857.559385987	8832.55680438	7526.2595901
RP4-675C20	1261.27453305	1093.97380881	423.165519289	982.128454054	889.799252391	1131.20892298	2926.01926052	215.511667802	2751.11867363	210.106986478	393.132216065	1809.17091351	698.956760438	291.44093352	418.966267769	705.640940723	0	177.971664064	0	501.161818385	1174.57399669	1487.77200192	383.104479487	461.797458867	0	2090.34708123	545.576953084	322.696816015	0	1528.48640106	1032.03354728	345.886356271	656.509300658	305.627581789	4242.64373788	3367.14022287	652.408780204	2440.5690919	279.296296224	587.115515173	1298.18343029	1657.78206001	995.531061067	790.72854961	653.947104834	1847.24286687	3965.92477434	2042.38076241	5511.01782988
AL157902	0	997.377893518	0	0	0	0	0	0	0	0	0	0	318.620069225	0	0	0	0	243.385630415	0	685.365199845	0	508.651656017	261.957783408	0	0	259.878163919	0	0	0	348.380951784	352.840067036	473.017821774	0	0	0	657.820245191	0	0	381.952405102	0	0	0	680.72059721	540.681483051	0	0	451.967595731	0	793.327087866
RP4-712E4	0	0	3079.8192916	0	0	0	0	784.252215513	0	0	0	0	0	0	0	855.948198015	986.760145744	0	0	0	0	0	0	0	0	0	0	1174.30158413	0	0	0	0	0	0	0	0	0	0	0	0	0	0	905.690453117	0	793.243154807	0	0	0	0
RP11-418J17	23221.3064927	26795.0811801	30574.0574037	21797.6056102	12801.032379	30668.3538124	16834.6552118	16659.9752043	12775.4254921	10732.4587432	19652.0043474	20261.9192825	30930.1803048	26669.3532391	19112.2869173	15163.2273233	21480.3700712	13855.2015733	16891.1713283	18618.0422725	7459.68461576	19964.3912476	32755.0822964	24787.4140234	13727.212336	26265.965009	34500.4006666	41782.0889528	18033.0703732	77032.6923406	16773.662784	12660.6311674	34312.2065884	9934.74293143	10957.0677327	33440.1392108	16989.5432332	38916.6212639	14877.0531716	13525.0833764	19208.1394284	34959.2303825	23114.8387339	26945.4289186	11730.1811816	27584.4112419	30423.5756169	29010.6314666	30187.02526
RP5-834N19	501.150893026	0	0	0	589.250104113	0	0	856.307345833	0	0	0	0	925.73767117	0	416.176878503	0	0	0	0	0	0	0	0	0	1039.974947	0	0	0	0	2024.41341356	0	0	0	0	0	477.817501667	0	606.080074087	0	388.80441573	429.846799377	329.348979166	494.451512354	0	433.062175061	0	0	0	0
RP5-1042I8	30463.6315474	20017.2789152	35772.5883134	43938.5046932	10094.4309594	17386.8226513	28309.0748655	34780.6335754	64182.647202	39444.4559779	27407.0142858	41462.4964582	56273.1339333	63352.6967011	34037.6951375	27114.4738223	41380.0299529	16021.9023313	40847.769568	55571.0645593	24823.3552311	45938.6553572	43742.1308853	53234.1353246	62642.6116165	50279.6361423	26354.698908	52433.1273916	82776.6887112	34680.1829883	41922.281048	25822.1090227	37239.2300393	45297.6508638	61398.992993	20859.7752438	19577.7041465	41865.9065158	22383.9848414	21270.9488632	20190.7803077	49504.6171246	28416.95432	27128.5641101	26803.3301462	61516.766868	71479.0577246	28775.6771533	43307.8366406
RP11-114O18	0	0	663.19638107	769.609061685	929.678210481	0	573.217008495	675.511362101	0	5927.13574458	0	0	0	1827.01627232	656.615201167	0	0	557.843955426	0	0	460.2059882	0	1801.23492667	723.741395619	0	595.645119403	0	0	0	798.49499663	808.715363732	0	0	0	0	0	0	0	875.441331861	0	0	0	0	0	0	1930.03246315	0	0	0
CH17-118O6	0	0	0	0	1600.45869146	0	0	0	0	566.870929158	2121.34996878	1220.2906885	0	0	565.187768093	1903.82691421	731.594321438	0	0	0	396.126673388	3010.51875252	1550.43006346	1868.90183173	0	512.707191385	1471.97253888	870.63951084	937.43818767	0	2088.32828103	1866.41028411	0	2473.7595951	0	1297.79726492	586.735322523	1646.17047248	3014.17775021	528.014676696	583.752163349	894.54279694	0	1066.69710309	0	1661.29376575	0	0	2347.7030367
RP11-439A17	4919.79504134	13038.7059914	13755.1842	2394.33930302	0	0	2377.78907228	2101.59090431	0	2048.88643023	1277.89382651	735.098857013	2271.99016683	1894.68354167	7490.27710961	1529.14492892	1762.83947606	1157.00968533	0	0	4295.25588987	1209.01733489	2490.59644181	1501.09326499	0	617.706049751	2660.13337909	2097.88082568	4517.67597195	828.068885394	1677.33556922	1124.31904914	1422.67520201	993.456104639	0	781.788548479	0	991.647354334	41761.7939051	1908.44520401	0	4310.95570116	0	642.574616568	2125.68427105	3002.27272045	6445.70780317	2212.94996188	2828.49625118
RP11-343N15	0	4113.94813546	0	0	0	0	515.786949043	1823.49758994	3879.64939608	592.589080954	1108.79634474	0	0	0	1772.48867158	663.4003047	764.785746229	501.95410734	0	0	0	2622.5848616	1620.7709359	0	0	1607.90402742	2308.13085255	910.139223997	1959.93692923	22273.3311347	2910.76380443	0	1851.6292563	4309.98442372	5439.09989424	0	0	1720.85495516	0	0	1220.47238689	935.126969202	701.952903172	0	3074.00466419	0	3728.51906951	0	818.071694576
CH17-437K3	1336.08306079	2525.71925056	603.432643835	2600.95077756	604.214675299	460.885776374	1192.14110778	2721.9676841	7145.62131738	428.016963168	1281.38343281	2487.73351583	1328.9467333	2731.04507774	1450.9367034	1149.99047904	5413.43837466	870.126890604	0	102.093587252	1016.92704984	2348.86778511	624.349408406	2069.63951254	1173.02471835	1316.20980508	5001.37037548	2103.60961002	2972.82077373	24494.7389245	1576.79620345	1972.93124243	3477.24041386	2614.94358072	1571.42755	881.913843191	886.031221614	1491.53294038	682.758176897	558.149867146	881.526341704	5335.8671723	2535.04291219	1771.90564667	7016.15122452	4264.83415941	11310.7914646	1525.55766761	8508.6604869
RP11-344P13	243.129406113	0	1223.57161779	0	285.87004405	545.143318178	528.78158148	1038.57690039	662.898750171	607.518650823	1515.64151516	1089.82679383	673.671502954	2247.18280523	201.904932659	2493.75088698	1045.40480557	1200.73388855	505.078054763	1207.57983371	1132.08294772	358.487698136	184.622701355	667.637411463	0	1098.94215828	0	1244.09211756	1674.429321	736.596159682	0	0	210.919870065	0	743.484197429	927.237580754	419.204952655	1176.13988537	807.577662725	754.501592281	625.610361109	1118.46743119	1199.39627189	0	1050.48350604	0	0	656.165395674	2516.0460839
RP11-763B22	0	0	0	0	0	0	0	0	0	0	0	0	0	0	0	2207.16202004	0	0	0	0	0	0	0	0	0	0	0	0	0	0	0	0	0	0	0	0	0	1431.34004918	0	0	0	0	1167.71410622	0	0	0	0	0	0
RP11-403I13	17774.1406389	10331.5734322	5681.84957652	23531.0258088	1972.9564665	13168.2357072	9281.2693172	10141.1477868	9658.44354691	3416.38955951	9104.36047534	52205.0068892	19860.4054576	6892.94382265	4902.92922668	4925.65962695	14029.0701038	7059.2683897	8133.62486999	6790.84194464	23113.9521458	32484.4551115	5710.25577038	54553.5613009	5674.52644465	3511.31617614	2486.6273215	17013.4116565	9929.7861398	1255.22991544	2669.7221849	11930.1093292	24746.5847287	7379.06910483	1615.3839283	2192.39017814	3214.64299889	21570.7861507	9908.56186445	6701.93265416	106.609955856	12497.7495882	64505.0208452	2094.2033037	7625.92742287	9860.50270967	8549.39694997	1844.97760197	8861.00245664
RP5-998N21	1612.9899457	19431.0586041	450.973539128	523.334161946	4425.26828189	0	3118.30052621	6430.8681672	1465.95323609	895.65606807	1675.86647534	2892.08893173	10428.4348657	2484.74213036	3571.98669435	2005.36434964	0	0	0	0	312.940071976	2378.30981449	2449.67950027	5905.72978825	3347.23365086	810.077362388	2325.71661143	2063.41564069	2221.72850478	0	1649.77934201	4423.39237333	8862.25031193	651.423360042	0	0	1854.08361917	4551.6613564	2381.20042266	1668.52637836	0	1060.03321437	1591.42751048	5056.14426865	464.613847816	656.21103747	704.423781347	2902.12580715	3091.14233165
RP11-14N7	13457.6038377	15563.3747103	11287.7763071	6986.10561835	3692.11894794	3017.45598286	6504.20252786	12647.1185648	6726.96061854	60528.8427408	5243.32478875	13271.2066593	4143.20018504	7255.80240688	10430.7120395	7529.07950101	20252.693337	10444.1154372	22365.506425	3119.2693869	5482.97861508	7275.71933714	23844.7150403	9444.00572019	25599.6216841	3041.41083614	3395.7125733	19511.041815	14211.2947664	2265.09903693	8717.5467814	8611.29226434	52925.5523302	19565.9936508	3429.4205531	2993.90537099	7734.55621824	16275.3087833	11423.5181183	6612.4555519	0	4422.06942826	12392.5225289	5624.63406922	3101.1174586	14782.3463745	25271.9378052	4842.64139454	13410.9154794
CH17-125A10	400.813973016	1158.82777617	0	390.131963112	0	0	0	0	0	0	0	359.329473236	0	0	0	373.736699879	0	0	0	0	0	0	304.362025237	366.880622274	0	0	0	0	0	0	0	0	0	485.619118242	0	0	0	4362.61471859	0	0	0	1053.63613782	395.455895397	0	0	978.376413693	2100.51819784	0	6913.09786631
RP11-289H16	0	0	0	0	0	0	0	0	0	0	0	134.856265136	0	0	0	0	0	0	0	0	0	0	0	0	0	0	0	0	0	0	0	0	0	0	229.998708557	0	0	0	0	0	129.022760325	0	0	0	0	0	0	0	0
CH17-373J23	8676.98721988	12543.3922977	1819.48978322	7390.02130702	8927.05417096	7295.80855798	14939.9845096	1853.27612888	10350.3902836	9937.39441518	16058.3747277	13613.0987181	14024.7923266	1253.1120254	6305.01974147	2022.70179358	10493.2130772	5356.58806766	9012.80494262	0	25251.6484592	41580.4405608	2470.85828557	34747.92983	0	8987.89004379	4691.64734294	13875.0331266	8963.74612878	5476.70919879	11093.6170933	2974.4233058	23523.3399755	1314.11052458	0	4136.49502884	935.056580274	2623.43594029	9607.14867933	2524.42751769	5581.81463398	8553.58213328	23542.7316632	7649.78599724	8435.35228023	11913.9179714	0	13172.473044	1247.14676205
RP11-89F3	987.832862631	7140.0215343	1657.12061622	2884.51900285	3484.46321409	5537.28252323	1432.29026795	3375.7838148	6733.38100567	822.781164894	769.754942741	3542.36614561	5474.24402401	2282.57151083	0	0	2123.73574675	2090.81671483	16417.0252761	981.277471169	3449.7330769	8010.92982134	1500.24116377	3616.80739438	0	2232.496668	0	1263.68411941	0	997.59479894	0	0	1713.93154257	0	0	0	1703.22642181	2389.32354666	5468.63614129	0	2541.84997112	3895.13517093	9746.27521727	2322.37597641	853.621242706	2411.27415343	0	3998.99225395	0
RP11-315I20	1738.13571734	2847.65514025	1263.50345014	2142.96316314	3951.13239454	1039.26337012	672.047527201	3266.91270809	1263.75278973	2605.8958877	2347.65777795	4155.30018927	3852.87002429	10576.2191971	2501.93033548	3565.5723889	4235.04816246	3188.36674524	1203.60349257	6100.65762787	1955.87544985	2306.55046664	1935.80994992	2863.76983267	3366.47062586	3491.71276891	3132.70017704	4002.3148203	1755.67626096	2574.45800638	1185.18630892	2383.2933046	3116.26315415	1263.53668974	4606.48891289	2651.53406713	2197.7284279	2522.47242657	2822.54360445	1168.68765726	1093.27721972	3655.28694612	2858.16722428	1543.72220846	901.190653091	2828.49585116	2732.67846212	5316.39425879	3730.68902096
CH17-270A2	0	0	0	0	0	0	0	0	0	0	0	0	0	0	0	0	0	0	0	0	0	0	0	0	0	0	0	0	0	0	0	0	0	0	0	0	0	0	0	0	0	0	0	0	0	0	0	0	0
RP11-458D21	9493.32297847	6197.7013611	15154.7657982	6259.57052938	22864.4862408	2574.90395608	4107.20014386	12950.6905727	2922.36405893	39408.1382269	10738.363298	2882.67611178	23051.7342435	17690.3935237	4450.45128212	5282.64205203	5102.40905306	2052.53894747	2862.79392146	13993.3840193	21299.7860218	7676.12877474	5697.31535524	5886.50853589	1112.11316037	15687.4216638	4967.45818145	8814.42808269	2952.66332341	2319.46878598	2975.59875899	10077.7043493	6774.49223022	3524.78872602	11471.6768396	11825.1083987	2112.05619759	14443.839943	5255.49727134	3920.15453012	14315.2274818	6440.12584811	15409.2655612	47757.0447941	3572.49866709	12894.6269771	2407.30665717	8264.80091541	8450.96683022
CH17-353B19	187.994166165	0	1103.78138947	0	1105.21185861	2318.35674874	136.289358663	963.666558522	2306.56977707	1722.41551552	732.459123837	337.073302067	520.900842444	1085.98869334	3122.36599156	350.588173013	3839.5911765	0	390.539874512	5415.65173774	1094.19605586	1524.55757339	571.020862533	688.313495135	780.240944255	2265.95066402	203.296906594	1442.94800048	0	1328.96370069	3845.63949187	515.546896659	0	0	2299.52754769	358.48246129	10858.7065109	2046.20140897	624.440670279	291.700415797	2741.18585796	617.734973411	556.443185481	589.294203805	162.452394341	458.888837391	0	3044.1879096	0
CH17-408M7	3559.0006682	428.738881729	373.145954361	144.339603374	0	2826.23947226	1827.60915396	760.149901561	0	4817.06277744	1617.7592059	4121.24571964	1780.53130095	1027.96660239	123.147689423	276.547487144	1275.24557842	1150.85537849	0	6923.45771325	3711.38540839	1639.89053403	4279.05665268	678.685784702	0	558.563981158	481.087951537	3794.03979113	1634.05301113	2845.38563811	303.347922093	0	900.523133185	3054.34908767	1813.89052422	282.774581365	4474.49257976	3228.12862156	328.376732834	1035.43303622	0	1364.37161819	1170.47465966	232.420605993	256.288174524	3619.761436	1748.56967001	400.214354808	0
RP4-704D21	0	0	0	0	0	0	0	0	0	0	0	0	0	0	0	0	0	0	0	845.852299809	247.803224416	0	0	0	0	0	0	0	0	0	0	0	0	0	0	0	0	0	0	0	730.350557312	0	0	0	0	0	0	0	0
RP11-337C18	0	0	0	0	0	0	952.360544655	0	0	0	0	0	0	0	0	0	0	0	0	0	0	0	498.771276959	0	0	0	0	0	0	0	0	0	0	0	0	0	566.255904633	0	727.242711983	0	1690.13060907	431.659831333	648.05076052	514.732546256	0	0	1721.10522493	0	0
LINC00624	1758.7117788	3031.30101875	1021.25567811	921.760385886	2147.4163122	5535.88924581	882.696500501	1040.21950943	737.719097961	2873.37541608	2319.22571174	1940.53415022	1874.26938636	703.355293909	1853.7224263	2207.55870624	1381.53514295	381.788242678	421.564070151	335.969371419	2480.34816214	1196.84893612	3236.00724783	3343.46672053	1263.33405226	2598.82834627	1682.42439989	951.851212157	116463.721644	614.800964336	1660.45368714	1020.2528539	2464.62370096	1229.32158167	2792.47533391	2257.26689995	2041.02483239	1799.72231921	1722.56141287	1416.9279543	1682.53656428	2933.9524625	3670.61820952	2809.4738852	935.239952469	1155.79945492	2126.94455906	1460.45152049	2100.02121021
RP11-533N14	0	0	0	0	0	0	611.774206376	0	0	0	657.570926422	0	0	3899.81948711	0	0	907.111344743	0	0	0	0	0	0	772.423552276	0	0	0	1079.51490918	0	852.205422413	0	1157.09068062	0	0	0	0	0	0	0	0	0	0	0	0	729.214559352	0	0	0	0
RP11-433J22	0	0	0	0	0	0	0	0	0	0	0	0	0	0	0	0	0	0	0	0	0	0	0	0	0	0	0	0	0	0	0	0	0	0	0	0	0	0	0	0	0	0	0	0	0	0	0	0	0
XXyac-YX155B6	0	0	112.222352431	130.228906279	0	0	96.9965503177	0	0	0	0	359.840428762	0	0	0	124.756047347	143.822132867	94.3952089523	0	0	233.620387896	98.6382788331	304.794818732	0	0	0	0	0	0	135.116821328	136.846254226	0	232.139323754	0	0	127.565212852	0	0	0	103.800965593	0	0	0	0	0	0	0	0	0
RP11-94I2	6400.75375276	7402.30803965	0	5607.15173513	4515.57987948	12916.5590287	3712.26253121	1093.68506245	0	11195.7008509	11471.7050395	3442.96301397	9458.8978374	4437.03951849	1594.63691712	2984.17313934	10320.705606	2257.93981958	41220.5538979	12080.7272343	2980.38163787	6606.41615137	3402.33263926	9374.17426707	10626.1385741	5786.2668742	4153.06537756	7369.34157389	1763.27659109	1292.80142312	1964.02302621	877.657216931	3886.9518912	5428.52800035	9786.67974167	4882.18971091	8277.15901416	1548.18413483	1417.38120397	496.585231655	10980.1002154	3365.18480754	19577.0844543	2006.40645581	1106.22344718	2343.61084811	838.599739699	12955.9187819	2207.95880832
RP4-565E6	1620.89675916	3257.5598248	33.1598190535	230.882718505	185.935642096	797.787469418	659.199559769	574.184657786	485.05805606	1811.06925529	954.997439991	1346.80612017	1387.53685188	548.104881696	164.153800292	73.7266305013	722.44939242	195.245384399	328.512953266	1649.41198463	2116.94754572	845.23265466	1921.31725511	651.367256058	328.160161849	178.693535821	128.256430777	1517.21738286	490.087170171	878.344496293	404.357681866	108.416479739	1303.2721047	1293.26696479	1450.73134994	414.62714089	1431.46161774	1004.04294626	962.985465048	398.728730123	33.9091330181	1039.24824939	429.061338609	185.887656936	102.488348783	965.016231573	414.366930204	533.479008668	590.95368105
RP11-495P10	981.137436555	567.330178221	164.588882893	572.99360797	7613.86096467	0	853.549414109	167.645155558	1605.05828769	326.881776668	152.907525122	527.753454696	362.476012017	0	1792.51157107	0	210.934129174	138.443025434	0	194.925295368	1941.59898671	2314.65675376	0	1616.53187635	0	0	212.200420751	1506.14280342	1081.13309235	0	802.81233188	1076.25118573	170.231469687	0	0	0	2706.69141485	237.31289658	0	761.189041222	504.924316473	128.957811968	8324.9857604	153.77567727	169.567097743	0	257.088971294	264.792500653	0
LINC01138	97675.0471602	18651.4478221	34710.5331919	74234.246537	47196.8684204	19607.7170831	43304.2305808	18044.9703524	47946.870698	49354.3338677	49897.24333	147542.068661	27364.2695817	11925.2479085	8412.9447918	9802.75869235	87016.8095004	17261.7148381	75049.1095165	47184.2961169	37881.8009932	117174.134715	21627.0164108	105064.902509	5553.22325688	20807.3451512	4547.49058101	33010.4584468	25406.7649395	2895.50750429	19257.2008857	30402.8661516	37227.0892657	21306.0763772	92792.0386477	4100.51865638	52649.2891604	47504.6423941	50263.4040462	11270.3914841	491.84603301	31341.5948689	78264.7184347	67331.8010043	27501.647518	27294.913138	13398.0043735	46815.0182579	26374.3987667
RP6-74O6	1459.98905217	16582.8929068	349.882490872	2233.12443723	4046.37997513	2338.27059169	2268.09057393	1158.23339116	853.006870544	4690.4681869	7719.94462524	2524.2671474	6260.72103328	4698.90968126	3290.89935126	972.398894946	3138.82141123	1397.93314848	4766.12309033	2071.8576698	1274.65199724	3767.24977543	3642.73020728	2195.4892766	4652.80007808	1806.90572658	1127.73734276	5336.25546683	2010.98543889	631.892964914	639.98090297	142.993195776	3799.71356945	3285.09425125	1435.05428631	2585.1661229	3416.36355431	4666.43031828	2655.67517352	1618.13309068	2236.18001061	4043.53669102	3086.72556756	2124.82279693	630.814035549	4582.02220677	2322.70518094	7599.08253743	3957.07330901
RP4-791M13	0	0	0	0	0	0	0	0	0	0	0	0	0	0	0	0	0	0	0	0	0	0	0	0	0	0	0	0	0	0	0	0	0	0	0	0	0	0	0	719.192404465	0	0	0	0	0	0	0	0	0
CH17-189H20	35063.242496	6131.5136091	27986.7876273	241378.543966	5984.58520466	4755.15696773	10864.8525096	21983.8092868	158435.291519	9420.87524641	16085.0444947	198998.606059	33690.6610989	28422.3883807	11741.1283154	4745.97873881	27052.5001639	34313.8995632	93987.7780643	176680.814942	36701.6868787	75048.0933198	7944.7406783	62895.3566856	29046.2424248	5325.45223208	8867.77746282	12660.5768086	26484.917813	5425.68651354	59868.0257094	19386.2676016	42928.7699478	35630.0680774	24211.5545104	19680.9833913	10482.3285006	44456.4970948	30994.9641793	15795.2159033	485.071294263	26202.1733681	78953.6162849	5539.85253577	19547.9905918	59014.6214764	71130.3953516	17552.3010876	25035.6982233
RP11-326G21	7993.57849194	2888.86534999	1117.45655713	14912.7079776	0	0	965.84529573	1707.31013289	16346.0272343	554.83119261	1557.22106116	15526.849132	3076.23447367	3848.05197179	553.183780098	621.130550772	2864.22413986	2819.8271446	5535.29790281	7278.82102951	0	9821.92843743	505.833525129	10365.5139351	691.169190442	0	1440.70940531	0	1835.05599215	672.714368843	6131.9232181	913.384855851	5200.94801725	0	0	1270.23342921	574.273687354	1611.20755979	1475.07990784	1033.60041137	0	6128.80560523	7229.49370541	522.020794698	1151.25555211	813.004825184	3490.94971287	898.88852434	0
RP11-353N4	275.321375759	0	0	535.967685972	323.721161806	0	199.598607201	940.873177352	0	0	214.540331517	0	508.580095866	636.181233083	457.277009152	1797.05291024	1183.82343747	582.736772749	1143.90757684	0	160.247293624	608.930823023	0	756.037097984	0	414.816498663	893.197674471	3169.84114517	0	278.042149522	0	1510.05835715	238.847080366	0	0	0	474.710509663	0	304.835460107	0	0	0	814.922646184	863.033647416	713.74475524	5040.39202153	360.714445459	0	0
RP11-196G18	0	0	0	0	0	0	0	0	0	0	0	0	1695.68046597	0	0	0	0	0	0	0	0	0	0	0	0	0	0	0	0	0	0	0	0	0	0	0	0	0	0	0	0	0	0	0	0	0	0	0	0
RP4-790G17	1054.24179457	0	0	0	619.785473654	1181.9073621	0	0	0	0	410.751587093	945.127101874	486.855035749	609.005424107	0	491.510870009	0	371.895970284	0	0	613.607984267	1165.83814436	0	0	0	0	570.028581233	0	0	0	0	0	0	0	0	1507.73505778	0	0	0	408.952543715	904.243547149	0	520.074349829	826.167364158	0	0	690.61155034	0	606.106339539
RP11-54A4	14714.9959958	22908.1954069	7595.34381689	4957.90258685	20629.0701863	10151.9621839	6564.84321308	9186.95452458	0	942.795861126	3969.15744159	10655.0644853	8363.65703518	8500.43360385	4229.98424331	6332.72952516	29202.1649147	3194.39065002	0	5059.85029871	19105.8149207	8344.94671752	8595.3666676	3108.27883592	7046.80768601	2558.13903912	9792.4909955	31856.2414703	30402.6005917	12002.6405809	1157.73988913	5432.23624795	49589.3230751	4799.96160031	38075.3350792	5396.10441732	16589.1692242	6160.14318911	7519.58028209	10977.147226	4368.9240857	40541.6211813	21219.033473	5765.77855197	26409.6292443	47661.6437741	31142.9461227	42004.452472	16919.9369732
ADAMTSL4-AS1	1435.4093084	2697.52300987	2287.5469376	4750.32534489	5738.33415653	2092.00307685	2081.24558386	1348.96166741	782.736281666	717.344676944	1230.37489131	2831.05578113	1856.06519349	1824.22906214	2622.45399947	1070.75136899	5400.46075188	4658.48636461	1192.77014305	2851.76747914	3508.93902216	2010.64839389	2615.9811597	1839.44037392	2085.10613898	756.937276068	3570.17900878	4406.98992672	5733.67513946	3044.14797342	1027.70388709	1574.56123129	6724.3378255	869.558260925	4828.3939412	4242.5893426	2103.69899582	3645.49536553	3178.56654436	5011.30634233	3816.65268356	6697.64184521	3682.17400085	1349.84782153	1736.54298573	4905.31515424	3949.28664599	9491.12463629	2805.84239105
RP11-316M1	0	0	0	0	0	0	0	0	0	0	0	0	0	0	0	0	0	0	0	0	0	0	0	0	0	0	0	0	0	0	0	0	0	0	0	0	0	0	0	0	0	0	0	0	0	0	0	0	0
RP11-68I18	2200.96093955	3181.69380651	0	0	0	0	1595.62161429	0	0	1833.21417441	1715.06803032	0	0	0	0	0	2365.91613892	1552.8287882	0	0	0	0	0	0	0	0	0	0	0	2222.71121869	0	0	0	0	0	0	0	5323.5805338	0	0	1887.8067037	0	2171.53851332	3449.61109947	1901.92803199	0	0	2970.01179095	0
RP11-126K1	13398.0826126	14966.3169831	18900.0237272	14819.3330648	13605.1937469	12289.5416001	23841.3753825	15088.6065412	14944.1834747	15217.4574672	1423.67297662	8189.5722177	19686.9050863	120317.003642	15678.016033	9653.65524299	10474.3471781	42107.2893733	8856.02880487	16333.9827604	10633.8859409	16612.2503224	7399.24768149	19510.5690146	25275.7665113	9175.63355456	21733.0314418	17918.5500621	13421.4451205	11685.4186886	8097.62244462	22546.4174369	12151.4418346	25087.1779434	40971.0320836	3483.89265778	9975.44989279	6628.63304329	31691.5428421	10867.0205063	4701.18853882	5603.19606303	13218.9771636	8113.28435773	13682.8026379	17095.4655393	6383.12811576	9039.79316953	7702.84658696
RP11-74C1	14446.3072577	7693.91411394	8928.36501707	4440.41107105	5363.96155381	4262.02957849	9370.6505712	2598.33057261	6219.19554706	13932.4277255	17774.3414051	10906.1939513	7724.76656721	7027.5535	3788.47073643	3544.83597158	7355.84835919	8046.47644796	3159.03365161	5287.00407194	22127.0757963	14013.610018	4618.92431026	2783.84569143	5522.37201656	5727.81973406	6577.78435556	10699.192211	3141.83828958	5374.91985611	5443.71634738	9382.95351919	9234.45540212	4606.02375787	20925.700684	5799.44959599	13765.1662635	10114.8030142	3367.35413306	11207.7781981	7173.66547404	7495.18434406	21754.8676516	8341.78684053	3285.1484189	18559.5040901	4980.77421154	61560.2443942	2622.78743291
RP11-404E16	703.484711519	2033.90519968	590.058836242	1369.47257332	0	0	510.002422512	0	0	585.943222102	1096.36124555	0	0	0	0	1311.92060257	0	0	0	0	0	1037.26907797	0	643.926923953	1459.85268262	1059.91430593	1521.4968486	1799.86411026	968.978164077	1420.8733398	2158.58979329	0	610.287773571	852.329629961	0	0	606.475950196	850.777823625	0	545.779656473	2413.5696922	462.31978197	1388.16106833	551.292988794	0	0	0	0	0
RP11-98D18	0	0	0	0	0	0	0	0	0	0	0	0	0	0	0	0	0	0	0	0	0	0	0	0	0	0	0	0	0	0	0	0	0	0	0	0	0	0	0	0	0	0	0	0	0	0	0	0	0
AL450992	0	0	0	0	0	0	0	0	0	0	0	0	0	0	0	0	0	0	0	0	0	0	0	0	0	0	0	0	0	0	0	0	0	0	0	0	0	0	0	0	0	0	0	0	0	0	0	0	0
AL591893	641.165793292	397.227773848	0	89.1540309959	861.575718061	410.748044069	132.806666363	234.760337085	374.604745168	305.163907349	856.490532541	903.26457266	84.5983196701	211.647540916	76.0644526054	85.4073402741	492.299415618	64.622468431	190.280075145	0	373.182368626	337.636259865	417.321891016	0	285.11359888	345.007394543	99.0509630081	585.864747499	883.140234721	0	187.368465873	125.59319629	953.528232253	443.900074986	0	349.321921394	947.572548128	221.545940929	101.413987337	71.0616004412	157.125795246	120.389916454	1355.56006003	358.897236559	0	223.581273414	720.024308021	0	0
AL589986	0	0	0	0	0	0	0	0	0	0	0	0	0	0	0	0	0	0	0	0	0	0	0	0	0	0	0	0	0	0	0	0	0	0	0	0	0	0	528.149650147	0	0	0	0	0	0	0	0	0	0
RP11-107M16	0	0	0	0	0	0	0	0	0	789.621218701	738.732073512	1699.80037969	0	0	0	0	1019.07219082	0	0	0	0	0	0	1735.52092854	1967.30777128	0	0	0	0	957.389466993	0	1299.90539938	0	0	0	0	817.291267897	0	0	0	813.135884967	1869.07619663	0	0	819.218371464	0	0	0	3270.22614431
LINC00302	0	0	0	0	0	1397.15539162	0	0	0	0	0	0	0	0	0	0	0	0	0	0	725.357782726	0	0	0	1025413.57593	0	0	0	0	0	0	0	0	0	0	0	0	0	0	0	0	0	0	0	0	0	0	0	0
RP1-20N18	1258.74354737	0	0	0	0	0	0	0	3431.99754269	1048.42683553	0	0	1162.59028603	0	0	0	0	0	0	0	0	0	0	0	0	0	0	0	0	0	2574.90644238	6903.84539874	0	0	0	0	0	0	0	0	0	0	0	0	0	0	0	0	0
RP1-140J1	0	0	0	0	0	0	0	0	0	139.077029203	0	0	0	0	0	0	0	0	0	0	0	0	0	0	173.252259361	0	0	0	0	0	0	0	0	0	0	0	0	0	0	0	0	109.734287202	0	0	0	0	0	0	0
BX470102	708.784031379	15369.1988959	58261.3649419	2069.68312634	60003.6377205	10330.0038936	4624.59823803	11505.3196965	6763.81436615	2951.78553507	2209.24017465	2541.69774289	7855.69481411	10645.5524417	8240.45894647	5948.11459638	2285.71559184	27003.4294355	2944.86187862	2112.24133625	4537.92571416	5225.41390504	4305.7768994	1297.55519516	8089.67329303	1601.84789173	22227.8941676	5440.26722593	26359.4907346	3578.94179281	724.950118901	10690.5590944	18446.5513481	6870.00153716	0	0	3666.26704356	857.18669612	8632.41207839	8798.25585575	7295.25302445	13974.0725059	699.309012764	9998.02538999	33074.2061157	20761.4791516	1857.23784159	1912.8889501	13039.8471241
RP1-178F15	0	0	0	368.174787299	444.750581094	0	0	323.159204382	515.661942344	0	294.75038511	0	349.361302035	0	0	0	0	0	0	0	440.317689213	0	0	0	0	0	0	0	0	0	0	0	656.289364544	0	0	0	0	0	0	0	0	0	0	0	0	0	0	0	0
RP11-216N14	922.461570251	2933.70884807	154.74582225	538.726343179	867.699663116	0	0	472.857953471	0	1075.66537587	718.815277412	330.794485656	1192.79483758	213.151898437	459.630640817	0	1388.2360874	130.163589599	0	549.803994876	107.381397247	408.043350526	280.192099704	506.618976934	191.426761078	277.967722388	997.550017158	1180.05796445	762.357820267	186.315499214	188.700251537	505.943572113	1120.35672158	0	0	703.609693631	954.307745162	1338.72392835	1225.61786461	1001.9337321	791.213103755	1212.45629095	728.104089761	433.737866183	318.852640658	450.340908067	241.714042619	0	0
RP11-422P24	18579.3388197	20335.4661273	25156.5634309	33584.9144831	34640.6755493	35409.7111877	29440.2315195	12925.2286858	22433.8400728	29623.6033797	38882.9386732	29029.6655818	52215.7175929	39557.8657213	13004.5002183	15344.2899813	41940.7856023	54679.7228862	33634.3515904	56422.7625771	28888.4734991	55180.8130443	33255.5221298	22108.3090921	27539.5340338	43788.7375367	50803.2948089	40744.4555284	12064.3931501	33505.2555004	21174.8829511	14921.4105683	20032.3303391	14792.547386	29219.2435503	64024.5125312	54001.1660591	26642.3055417	18807.7889519	25533.8662979	52133.0202468	20408.2558198	30900.7786472	34943.7333094	11926.6178142	16520.9689969	12518.6736883	43695.6177593	23804.8478573
RP11-350G8	0	0	0	0	0	0	0	0	0	0	0	0	0	0	0	0	0	0	0	0	0	0	0	0	0	0	0	0	0	0	0	0	0	0	0	0	0	0	0	0	0	0	0	0	0	0	0	0	0
RP11-61L14	0	0	0	0	0	0	0	0	0	0	0	0	0	0	0	0	0	0	0	0	0	0	0	0	0	0	0	0	0	0	0	0	0	0	0	0	0	0	0	0	0	0	0	0	0	0	0	0	0
RP11-307C12	8478.79570954	14980.6409263	19754.7858191	26133.9587755	25477.1390447	21123.4507269	8537.27459461	9658.37521983	14127.4592214	14908.9182795	10277.5290728	8868.1074878	40025.6991092	17959.18123	4302.92514807	8345.22711206	26836.4179813	16948.9610287	11742.5906699	32754.2805458	15079.0898261	13543.5665281	11803.8373918	16815.4383833	57672.4029121	9226.16270054	30053.8473254	34949.8018406	10381.0426589	29017.6479627	6263.24239146	26481.3018596	18388.8337281	3424.25295641	40332.3893033	13473.3771121	29238.3649581	22217.1205131	14603.1064719	19734.1355138	32725.920717	15787.7287247	18589.8916535	14765.5443807	13839.5614243	18396.9051806	19131.4093307	15890.864088	20581.8237852
RP11-263K19	18240.305368	21668.8004779	6210.62407532	14238.5062295	21022.1477882	22878.7547478	70962.2852474	5091.61827058	10832.8598061	8724.48089339	17028.0578768	18619.0946101	13010.523345	4590.33454984	17247.1766372	6062.2818631	30090.502525	10957.7256043	14631.7525538	17939.861637	9985.85162496	19971.41159	12890.9877733	10744.9898179	8994.48581804	20679.5180802	18357.983809	31188.8640507	9203.89767654	5653.83501453	6834.49855376	11143.3828983	39951.3001485	7658.28806191	85048.3132407	32371.4479008	68193.6225573	9828.44342792	14196.9363011	7846.23728787	22460.7328302	15547.8320151	14432.8118752	12312.8273337	3433.32689845	10139.1532661	9464.42700466	50202.3202245	10382.9157013
RUSC1-AS1	15521.281711	50445.5924169	21458.4394471	22088.3929558	44303.027168	45962.2797291	24910.485219	13626.2707183	10798.6885139	19703.9240231	48545.7908172	23127.3892104	69601.9922779	13727.5642441	37957.4382445	15670.4736935	52585.1104972	28320.5762354	64265.5800669	26795.9080096	37444.2230604	34328.5617422	22678.3469095	19008.2979059	14660.8072307	41367.8584803	56720.7620677	39300.3604678	15333.8865328	21620.2285777	14670.9615359	40363.2457275	55810.2614548	8429.96668996	18494.4865971	67971.5780827	86837.6621123	26926.7793552	22755.4989196	25661.4231825	47742.8248273	42911.8489323	42667.3966594	28017.7884436	10174.9904101	22993.5153061	23701.1755783	112090.069571	28678.3455229
RP11-29H23	0	0	0	3330.30830329	12068.9134961	3835.82662064	3720.6994915	2923.12189418	4664.39666029	8549.44428612	2666.15121077	0	7900.32944374	1976.49942187	5682.70610465	0	11033.7725388	4827.88586878	3553.91285806	6797.57666392	2987.1552325	5044.8996065	3897.21738679	14093.2188129	1775.04814818	1288.75944016	16650.01665	6565.4134022	4712.75743437	8638.26405446	1749.7659688	4691.4767596	0	2072.71069104	0	6524.38079549	5899.35697009	6206.81094054	9470.68349923	2654.47378375	8804.04399087	0	5063.63298788	8043.86588194	1478.3167885	0	0	13851.0549887	0
RP11-243J18	0	0	0	0	0	0	1737.90634423	0	0	0	0	0	0	0	3981.51383128	0	0	0	0	0	0	8836.607591	1820.35631655	2194.27327589	0	1805.904948	5184.71856051	0	0	0	4903.80271511	0	0	0	25657.3081635	2285.6111067	0	0	0	1859.82239626	2056.14615498	0	0	0	0	0	0	0	0
RP11-336K24	3489.70162877	14881.8306972	6732.19655072	4245.87289478	29953.1371885	6259.6707022	5818.8037172	3875.81298904	2616.56001806	2179.96956762	9245.62404104	6569.88213514	10152.8573102	6249.29348965	19706.3707291	5531.71899876	12379.1050273	4554.82046498	6887.04485242	6239.77830068	11679.0337478	13506.859169	6359.85405725	6867.65826868	2353.56407223	11698.6137406	17170.6244956	14955.0600446	1201.67667543	4933.86245484	1606.18294772	3588.75134601	8930.79906016	1479.82126296	533.571412898	9482.58404907	24669.540969	6119.52616298	8500.34457789	2572.02142237	12122.3971502	4816.09898047	8435.47575481	6153.16583459	6031.14869673	1703.65406112	7543.89863195	21426.2185809	4012.60942449
RP11-139I14	0	2727.16611987	56.512974828	0	79.22069964	151.070865832	0	172.687115124	0	280.594006288	0	60.4028598942	808.984683462	0	111.904345061	62.8246976703	72.4260042526	142.606725447	279.935849901	133.858473511	78.4310957334	99.3446037799	102.325793662	61.6721991255	209.726419227	0	218.582388292	258.573388558	0	0	137.826177278	277.15491061	58.4504043789	0	103.017681491	256.957353206	290.426632076	244.450126552	149.19802147	209.088518591	1155.80002267	177.11498987	265.902675101	0	0	0	0	272.756184883	77.4722388884
RP11-98G7	3041.32784374	30775.6564557	12435.9369881	4810.44532698	45593.6732073	25145.9745131	11851.1168989	4222.28718049	1554.79888676	21215.287673	15108.1901943	3749.00417077	6671.38930805	3952.99884375	62194.0612564	2481.3851801	4086.58242177	6168.96527677	11846.3761935	3776.43147996	20135.6389746	7847.62161011	4907.60707966	10439.4213429	5127.91687252	22052.1059761	27544.4719889	3890.61534945	3665.47800451	26106.7535868	3110.69505565	8861.67832368	4287.42572241	4606.02375787	15113.0060496	13773.6927905	6227.09902398	3678.11018699	13890.3357989	3834.23990987	11412.6496178	3247.91321576	6001.34280045	8341.78684053	0	463.987602251	0	5130.02036618	0
RP11-284F21	0	892.893283776	0	0	242.08250995	0	447.786590881	175.899019891	0	171.487759204	160.435794959	184.578979961	0	237.87192167	170.978575359	0	0	0	0	0	0	0	0	0	427.25447768	0	222.647925055	0	0	0	0	0	178.612668961	0	314.801295848	0	0	248.996791925	0	319.466210299	529.783828772	270.613876755	0	0	0	0	539.493049172	0	710.218697644
RP11-66D17	456.531199251	395.974993387	0	266.618568677	644.143854715	818.905246521	397.163458579	234.01994786	373.423313415	912.60443617	142.298220856	1064.1278214	590.320589197	632.940135098	151.649119726	255.41394555	785.194875799	193.255984558	189.679968164	272.100958163	212.574527301	673.142839295	1594.68866061	83.5761534	663.16694522	1994.73198162	394.954300825	350.410225251	0	92.2085440068	373.555083102	876.379695509	158.420164416	0	0	870.550567083	1889.16817092	220.847227385	202.188294016	425.024914429	156.630250525	60.005114836	450.428294248	214.659205971	78.9009445587	334.314211229	239.251163	985.680769048	0
RP11-85G21	0	0	0	0	0	0	0	0	0	498.377780325	0	0	0	691.303454392	0	0	1286.39637442	0	0	0	348.263991071	0	908.731134174	0	0	0	0	0	0	0	0	0	3633.58936729	0	0	0	0	0	0	0	513.219310544	0	0	0	2585.29168101	0	0	807.427688795	0
RP11-367J7	0	1435.53994964	0	0	0	0	359.962131984	0	0	0	386.90848705	0	458.594321272	0	412.333556406	925.959792048	0	0	0	0	0	0	0	0	0	0	536.939850924	635.176318594	0	0	0	680.821165641	0	0	0	0	0	0	1099.4988759	0	0	0	0	0	429.062920146	0	0	0	0
RP11-404O13	0	2180.63984334	0	2936.54439569	0	0	6561.55421347	4510.62897499	1028.22371269	4397.50975305	587.728723816	2028.5192908	10449.3335328	2614.20765218	2505.40148902	7032.84090553	3243.05939684	1064.26341797	1566.85536828	0	3072.95862261	556.051058832	3436.42414867	0	1565.17271583	2840.95267371	815.632078157	0	3116.65321311	3046.76247211	0	4136.77309463	14394.9641181	1827.6406895	0	0	650.229726162	3648.62633779	25887.8001863	1755.46362453	646.923740144	991.347027471	1488.30896103	1773.1968878	74300.9720555	2761.60957653	1976.3392663	0	1734.50872317
RP11-144L1	2257.8385642	0	2476.5044373	676.204731633	1225.27040569	1362.9840784	1385.03195961	1038.67275428	1894.17123261	3471.85554766	1218.03862421	622.815644428	1122.88946408	1605.27871827	1875.00455229	1943.36185244	560.089976588	5636.61801939	0	345.054652991	1718.49878012	2432.81960719	2505.82505411	953.855757217	360.415867651	1046.70817475	3005.07914721	888.71924226	717.678797113	701.584897824	1954.05336617	4048.4824829	301.341909424	3998.12214516	1327.77288604	1324.74736964	1347.56885104	2730.57672511	1922.98142116	1751.68320755	2532.46612259	1255.53849418	856.790691689	2858.22645551	1650.9121496	2119.74031485	1592.83642298	1640.56488868	1797.34164184
RP11-550P17	354.058627152	0	0	2067.73610552	0	0	256.680429016	0	0	0	275.895233475	0	327.012695696	0	0	0	0	0	0	0	0	261.024909085	0	0	0	266.723496553	0	452.929115235	0	0	0	0	0	0	0	0	0	0	392.013239855	549.373689958	0	0	349.325574579	0	0	0	0	0	0
RP11-180D21	0	0	0	0	0	0	0	0	0	0	0	0	0	0	0	0	0	0	0	0	0	0	0	0	0	0	0	0	0	0	0	0	0	0	0	0	0	0	0	0	0	0	0	0	0	0	0	0	0
RP11-190A12	6684.06580411	8175.90990445	26738.0486313	4504.10549216	92495.3616297	25938.991492	21619.3649871	13617.2754907	700.933924361	41968.5835175	5208.46479699	30883.1900953	23744.1595304	26731.3446401	19214.0677719	4794.2453714	100037.52789	27206.3240556	64086.9531781	18897.634578	28130.4053771	14025.0965836	66373.374438	14589.5191718	22939.8298932	34472.554424	62273.286317	82217.1532607	19829.6351064	11423.2781485	6836.5173098	9165.04339648	69136.7672451	13704.8083943	44024.0151002	33334.9510589	70034.7159427	24872.4664284	41557.1521851	24731.5726847	46305.4226296	49670.9552637	51743.1349035	39486.7368886	17327.8115374	20080.7749171	24924.2840668	140844.28866	35472.1251173
RP11-48O20	0	2575.47759013	0	433.531258417	523.700388389	0	0	3044.19794897	0	370.981803343	0	0	411.378101212	0	2959.04223201	0	478.783029296	0	0	0	0	0	1691.10024673	0	0	0	0	0	0	0	0	4885.79828218	772.790435173	539.640653289	0	424.663838759	0	1077.31629737	0	0	0	292.711341247	0	0	0	0	583.546327743	0	1024.28384954
RP11-536C5	0	1687.03764625	978.85729423	567.9595556	2058.26431716	654.171981814	0	2492.58456093	0	2430.07460329	909.384909098	523.116861037	0	0	4361.14654543	1632.27330784	627.242883341	1235.04057108	0	0	339.624884315	430.185237763	886.188966504	0	3632.65667535	879.153726623	0	0	0	0	1790.45820063	18402.2266694	0	2827.88435367	0	556.342548452	3018.27565912	0	0	452.700955369	500.488288887	1533.89819134	1727.13063153	457.274029464	0	4985.16912186	0	0	1341.89124475
RP11-574F21	22973.7646365	28326.7856131	7367.79031609	8549.98361527	23039.9964407	24240.7714626	12736.3262067	7504.60378578	15659.6440839	17446.801326	20534.6296125	24230.5476028	23091.0885716	14832.6168464	16272.7401022	16381.3425329	16705.8315518	11918.0306455	7018.49936061	7383.36423998	18484.2520072	24409.3436975	13340.5646035	17936.312792	8413.1545982	24433.2130846	28497.3354991	19880.9047368	10237.7674966	11600.3976889	11057.7669842	7412.02791462	24033.5050508	9823.9788588	4132.54412072	24481.0697712	22718.3495527	16343.4878147	9725.72883583	18347.7990439	17966.3614655	32860.395275	13999.9906667	21180.7360147	11677.9064083	13194.9077552	12393.8115928	31912.9633192	20977.5906887
RP11-528G1	592.699717579	0	994.27236973	576.90380057	0	1328.94780557	2148.43540192	5570.04329443	0	0	461.852965644	1594.06476552	1642.2732072	7532.48598572	1476.60867286	2763.29733217	1274.24144805	2090.81671483	1231.2768957	0	0	0	900.14469826	0	1844.93193354	0	0	4549.26282987	816.383177608	598.556879364	1818.65439277	1625.39352301	4113.43570218	718.104491385	0	0	0	0	1968.70901086	1379.49031282	508.369994224	1168.54055128	1169.55302607	0	3073.03647374	0	0	0	0
RP11-404F10	365.313584724	2244.4027895	229.809374464	177.788844146	214.766720791	1126.26794734	926.939612864	702.230205106	124.504642716	152.137648058	426.998252634	982.510192776	2530.55929768	1582.73431016	1061.80143183	1618.01418649	196.346352708	1030.94869316	379.451991639	90.7223286861	531.565276349	201.99185515	277.404456877	668.771471613	284.283372434	481.603867472	691.337745451	1401.98102255	251.591030226	553.385515743	373.64572981	500.90991852	316.917213162	110.651868971	0	435.380907245	157.468882968	220.900818073	2022.37356936	425.128050783	78.3341291754	300.09837825	270.322556985	0	315.680362505	334.395335765	358.963829369	739.439965424	1050.13328423
RP11-312J18	0	0	535.053351507	0	0	715.154115712	0	544.988827729	0	0	0	0	0	0	0	0	0	0	0	0	742.569662316	0	484.399901182	0	0	0	0	0	0	0	0	0	0	0	0	608.20498941	0	0	0	494.901891886	0	0	0	0	0	0	835.757028717	0	0
RP11-544M22	0	9434.73365747	1824.74842422	4235.07414291	17905.7098111	4877.92980659	1577.17512164	0	0	25368.2932575	27123.8504679	9751.74495286	6027.99703222	5026.93494581	7226.56267643	8114.19101008	7015.69352177	21488.2781443	9038.85351182	4322.15857243	6331.15752553	9623.21890257	6607.99865197	13939.3429492	2257.28666243	1638.8848372	23526.0350867	8349.08062707	2996.55096983	0	0	5966.03980989	5661.91836174	0	16631.6985205	12445.3506503	5626.55433564	5262.03625017	2408.72875125	11814.7099046	22391.7881849	24305.1931619	12878.604131	27277.8496189	7519.76169875	2655.18916895	5700.53927102	8807.02918356	7504.50739475
RP11-297K8	0	2871.07989928	0	966.580246338	4670.46784368	0	1439.84852793	848.399494354	0	2481.36905402	0	1780.52968532	917.188642545	4589.23348615	824.667112812	0	0	1401.23336561	6188.87199556	986.4557164	577.989578848	1464.21888315	0	0	2060.74191346	0	0	0	1367.81878043	3008.57745432	0	1361.64233128	1722.9760362	1203.15660166	0	0	2568.32163606	0	0	770.427747263	1703.50895162	0	0	778.210419537	858.125840293	0	2602.09312371	0	0
RP11-122G18	1827.01126535	0	0	1778.31996778	0	2048.25693335	1324.52085458	0	0	0	0	6551.65777416	0	0	0	0	3927.8801918	1288.99865429	0	0	0	1346.93921533	1387.35894028	0	0	4129.03509955	1975.73013107	2337.20218201	0	0	0	0	0	0	0	0	1575.0710357	0	4045.72887346	0	3134.12569254	7204.1092239	1802.58779504	0	1578.78491976	2229.84333121	0	2465.39813715	0
RP11-25K21	680.586474977	983.851068561	0	0	800.22934573	0	0	2325.81127204	927.818503856	0	0	610.145344248	628.597641093	0	0	1269.21794281	0	1920.67792248	0	0	396.126673388	0	516.810021153	0	0	1025.41438277	2207.95880832	0	0	687.312148998	696.10942701	2799.61542616	3542.53843248	0	0	1297.79726492	0	1646.17047248	4521.26662531	0	0	1341.81419541	671.488401045	533.348551545	1764.35638411	1661.29376575	0	1836.78848554	0
RP11-5K23	0	0	0	0	0	0	1181.17444175	0	0	0	0	0	0	0	0	0	0	0	0	0	0	0	1237.21186882	0	0	0	0	0	0	0	0	1117.01827609	0	0	0	0	0	0	0	0	698.733650069	0	0	0	0	0	0	0	0
RP11-474I16	1309.09328926	946.208071155	1098.02253005	1911.30737406	3848.05937556	733.810310035	1423.57197936	3355.2355655	0	545.181954477	2040.18527433	586.800652816	604.546948738	1512.45173152	0	1220.65656065	1407.20577306	0	0	650.202985244	761.941044812	482.555614535	497.036420344	599.132007504	2037.44657009	493.09056841	2831.30717913	5023.96851646	1803.14197489	1322.02997703	669.47567502	0	1135.66594386	793.037133964	0	1872.21361957	2821.43159439	1583.18655875	0	1015.62475204	561.417297969	3011.10884083	1291.59334184	512.942172182	0	798.865610833	857.559385987	1766.51136088	752.62595901
RP11-227F8	0	0	0	0	0	0	0	1419.61769695	0	0	0	0	0	0	0	0	0	24032.8534969	1725.96209442	0	0	0	0	0	0	0	0	0	0	0	2549.32790157	0	0	0	0	0	0	0	0	0	712.615775567	0	0	651.085538641	0	0	0	0	0
RP11-565P22	1455.95481881	0	0	0	2567.85393533	816.13332354	1055.51758624	1865.82248565	0	0	0	652.631286981	0	841.063583776	0	0	1565.07411898	1540.81463897	0	0	0	0	1658.39037736	0	0	548.40827241	0	2793.79293711	1002.71434774	0	0	0	0	0	0	694.083063349	0	4401.99357485	0	3953.47159282	0	8133.07237334	0	0	0	6219.4082855	0	0	3348.23927606
RP11-359K18	0	0	0	0	408.989674851	1169.89166803	252.173101704	0	0	289.722388008	271.050492777	311.839533613	321.270328581	0	288.862140255	0	0	1472.46056996	0	0	0	256.441292382	0	0	0	262.039812233	0	444.975646483	479.1158205	351.27876007	711.54993186	0	0	0	0	0	0	0	0	0	298.350227664	0	0	272.589416825	300.581971785	0	0	0	0
RP11-267N12	0	0	0	0	390.579724792	0	0	0	0	553.362089717	0	0	306.808910436	0	551.719039286	0	357.080017436	0	0	0	193.343380744	244.89803915	0	0	0	0	359.223660195	0	0	335.466565222	339.760382292	0	288.176486196	0	0	0	0	401.735335957	0	0	569.841035008	436.612680236	0	520.638568411	0	0	435.21328062	0	0
RP11-77M5	1604.9651201	2320.12640049	673.094834519	1562.1915282	4717.77002334	0	0	685.593621237	0	0	1875.96993508	719.425107397	741.182293229	0	5331.3234244	0	2587.87842061	0	0	797.157178072	467.074734293	2366.47742736	2437.49204007	0	832.64518678	3627.21207039	6942.43764606	3079.72483685	0	2431.2384972	820.785742295	2200.69272305	0	0	0	765.119283053	0	1941.00697501	0	1245.16893907	0	2109.51883458	791.754980337	2515.49466102	2080.36051261	3917.67783564	0	1082.88276386	3690.91621689
RP11-477H21	22634.4976063	9892.17528935	19426.5524547	87100.3710092	17329.7219431	20064.3238618	15264.4081703	27882.0857599	101899.12704	225354.582721	95571.2664782	37280.3072086	23336.3577415	48652.2934615	77372.229271	85894.1023882	24330.8830342	121439.898392	37179.3960535	49674.5986979	131128.455334	71404.732892	74346.9163018	85763.8614938	96671.8529932	131255.192214	79123.1560462	77438.2093592	28276.5446062	70169.2833962	66760.3015789	10826.4848298	20549.200208	21683.742614	226963.368957	20576.8932781	36757.5318906	65569.3873718	19232.7726446	206232.193969	34764.6865281	22485.5530322	67515.1065051	64350.9270555	6823.00056233	19915.7755428	15172.2045213	52562.9779058	53868.0188145
RP11-506O24	744.293317065	0	0	241.485770179	291.711818187	556.283359618	179.862423232	0	338.222566007	1239.866673	579.980157912	2001.77546363	0	0	618.092621797	925.34940326	266.691931282	700.154839243	0	0	3321.2492807	548.720128591	376.790958072	0	1287.11467568	1308.29897024	804.878853659	0	341.729280014	0	1015.02574327	0	215.230032209	0	3034.70939386	236.546436224	427.771434878	300.043596335	0	1539.83976909	851.193002853	489.138595954	0	1360.9704964	0	0	0	0	0
RP11-38C18	0	0	0	0	0	0	0	0	0	0	0	0	459.807533763	0	0	0	0	0	0	0	0	0	0	0	0	0	0	0	0	0	0	0	0	0	0	0	0	0	0	0	0	0	0	0	0	0	0	0	0
RP11-280O1	373.007255364	539.216690698	0	90.7665791284	0	104.54433307	135.2087691	0	0	77.6708681428	0	167.200384226	0	0	0	0	0	131.582617831	193.721711787	92.6329822883	0	68.7486319022	70.8116803017	0	0	0	0	0	0	94.1733444985	0	0	0	0	998.066744715	0	80.3926247163	0	0	72.3469068912	79.9838816482	0	92.0052244247	0	80.5821837143	569.063089976	122.174590422	0	107.224956995
RP11-306I1	0	0	1924.88705725	0	8095.00295468	0	554.575804967	653.543512927	0	1911.46112088	0	685.793445872	1413.06705498	3535.20221799	0	0	0	0	0	1519.78340047	3116.67957862	0	1742.65818108	0	0	3457.64727849	0	1957.16930689	0	3090.11071867	0	0	0	0	0	6564.16360521	0	0	0	593.479911002	656.127939699	502.725779175	754.742044264	1798.42529881	1322.07192468	0	0	0	879.593346404
RP11-466F5	1925.58489641	11893.615406	6607.28673606	8689.78120068	6174.79295147	5298.79305269	3172.68948888	2691.99132581	2863.72260074	3936.72085733	7229.61002733	4394.18163271	5012.11598198	3842.68259695	9303.77929691	1469.04597706	6021.53168008	3458.11359903	363.656199429	3825.61291318	5603.8105912	10195.390135	2126.85351961	3204.65957502	2179.59400521	7648.63742162	8140.00814001	4926.60478552	1446.70693334	13435.5139526	2506.64148089	2400.29043514	3340.97074183	1060.45663263	9635.55519868	13352.2211629	8602.08562848	4657.51394608	3294.91686392	2987.82630543	12011.7189333	5176.90639578	3626.9743262	4801.37730938	1815.23549844	1068.25052611	3898.90372001	7322.80581573	2817.97161397
RP11-525G13	5273.89493922	13861.6469023	8646.05320238	4900.00775835	20012.3597461	1881.26528528	5213.71903268	3891.28965531	980.414584647	4592.37665475	6724.81451887	6017.50987919	7085.13621451	2215.69361943	15129.7525589	3799.97384724	5153.77910516	1014.77855841	996.001055761	0	5302.0419838	8129.67898372	7463.46089784	3949.6918966	1243.66430764	5056.5338544	5443.95448854	4906.63591841	4952.89794059	2420.91476685	2697.09149331	5587.93728691	7694.67928525	2323.54829059	366.532973764	5714.02776675	6406.62651847	8987.35681836	7166.3515905	4091.60927177	5345.98000295	8822.35711326	6149.46511479	3569.35874592	7871.80149802	5266.4070523	3768.89156899	11321.9876235	2756.43265243
RP11-375H19	2534.43986978	1831.88431284	1594.35089591	4933.79007895	9684.93058326	0	2756.07369741	3789.23208505	2591.33147794	2638.71737226	1974.92682279	1704.09280489	585.209588425	2196.11046875	1578.52947351	4135.64196684	3405.48535148	1341.07940799	1316.2640215	1258.81049332	2581.49217623	2335.60166967	962.275897972	1739.90355715	7231.67764074	954.636622343	1370.37174074	1621.08972894	3490.93143287	0	1944.18440978	1737.58398504	4947.0296797	4606.02375787	0	1208.21866583	1638.71026947	3065.09182249	2104.59633316	2949.41531528	1630.37851683	2498.39478135	3750.83925028	993.069861968	10402.9699932	0	2490.38710577	855.003394363	3642.76032349
RP11-9L18	0	1124.11082833	0	0	0	0	0	0	0	0	0	0	0	0	645.762057346	0	0	0	0	0	0	0	1180.97496569	0	0	0	840.909931819	0	0	0	0	0	674.594956323	942.141223201	0	0	670.381473874	940.425900082	0	0	0	0	0	0	0	0	0	1049.32234763	0
RP11-479J7	889.750167051	2572.43329037	9701.79481338	0	2092.32542879	2992.48885298	645.038524926	3040.59960624	1212.96367053	0	5546.60299166	0	4108.91838681	2055.93320479	1477.77227308	0	1912.86836764	2510.95718944	1848.3707536	0	517.867731403	655.956213611	0	4886.53764986	0	1340.55355478	0	0	0	898.542833088	0	0	3087.50788521	8624.04448282	0	848.323744094	2301.16761245	1076.04287385	28568.7757565	690.288690811	0	0	2633.56798424	697.261817978	3075.45809429	0	0	1200.64306443	2046.14622426
RP11-276E17	536.896320488	3104.53432761	1801.32084102	522.58760822	631.279355476	601.91287913	389.231520747	1834.76980519	0	447.189192332	0	481.327211653	495.883731133	620.299390602	1337.58417584	1001.25181508	0	3409.13481462	0	533.333404444	0	0	0	0	0	0	1161.19944936	0	739.519711528	542.20202339	0	1472.36075194	0	0	0	0	0	0	4755.60712087	416.536542386	0	705.680694305	1589.15728578	0	0	0	703.418897208	0	0
RP11-102C16	0	0	698.410348206	0	0	0	0	0	0	0	0	0	0	0	0	0	0	0	0	0	0	0	0	0	0	0	0	0	0	0	0	0	0	0	0	0	0	0	0	0	714.192359142	0	0	652.525993373	0	0	0	0	0
RP11-277B15	0	0	0	0	0	0	0	774.803393639	0	0	0	813.037049082	837.62529042	2095.56565211	1506.25944942	0	0	1279.68059172	0	0	0	668.601152668	0	0	0	683.197775508	0	0	0	0	0	0	0	0	1386.64281641	0	0	1096.78586901	0	0	777.867340559	0	894.778519947	0	0	2213.72398183	0	0	0
RP11-52A20	596.456926565	287.411326421	0	193.52029232	0	0	144.136976251	169.859169762	0	662.397514685	464.7807182	356.482171547	0	1378.22463649	0	370.77523633	213.719841392	0	0	0	231.440095492	732.882932798	0	909.933714514	412.583827364	149.776585756	860.011425252	254.338959057	273.852782769	401.567478496	610.061035081	272.616187827	517.43892054	0	0	1516.49632859	0	1202.2349066	0	462.745033618	1875.83962475	1045.28719854	0	0	343.612988348	0	1041.93691906	268.289496171	0
RP11-104L21	3726.3794125	5386.82812786	46883.3877311	2418.04563275	0	1392.54431772	2701.49798063	6367.19620515	1693.34532222	3103.75865173	2903.72904143	1113.56559528	2294.48511897	7175.41044245	5157.57154712	4632.85493315	0	1752.69784015	7741.19632448	0	7952.60248916	1831.48170533	5659.32557817	1136.96668091	1288.81383696	3742.9317074	9402.64966668	9533.93365336	8554.51019441	18816.0207127	1270.45713906	47688.9386784	4310.28328529	4514.81536663	0	10658.6418936	2141.68074822	7510.99233729	6876.40386083	0	23438.7089746	9795.68646946	13480.7390876	973.405112226	4293.46129995	15159.9909646	19528.5800769	1676.14526816	9997.75407596
RP3-455J7	149.173333596	1078.21966095	1751.70062761	435.593238243	0	334.475567396	648.873474539	764.669223211	3050.43776832	745.492565575	116.241233922	668.668995975	1377.78238416	4653.35178991	4831.31375128	1251.86240613	641.413650028	1262.94279564	309.893313029	148.183399332	347.297741393	329.928036097	226.552470628	1638.52986594	619.121034641	899.015701422	645.264220373	3434.93685727	205.470993968	150.647490446	457.727126203	2659.06134214	2199.98703949	361.471543424	0	284.455761991	128.602708424	0	7432.40322175	462.928444253	511.795396484	784.27612637	735.895929009	116.901208484	644.529713577	1820.64100764	390.881210418	603.890625745	1715.25931998
RP1-313L4	1572.55287185	3788.78580024	2198.33897903	1020.42872803	30200.2988597	587.661459986	3040.12586121	1343.49613521	0	873.202294776	3676.16949674	1879.72353966	0	605.612636229	1305.91435552	0	3380.82166926	0	3266.82797537	0	2135.66344385	2318.68644867	2388.26692226	0	0	789.769016256	0	2011.68655778	1444.02038379	0	4289.11992352	718.749921387	1818.96355911	3175.46206148	0	2498.89236596	2711.40362135	1901.80836618	5223.38532827	813.348513128	1348.80896796	2066.91713109	517.176999691	0	6341.52605654	639.760064385	2747.05652893	2122.02792306	1808.18910765
RP5-968D22	0	0	0	0	0	0	0	0	0	0	0	650.116330191	0	0	0	0	0	0	0	0	0	534.623272365	0	0	0	0	0	0	0	0	0	0	0	878.605687918	0	0	0	877.006041695	0	0	0	0	0	0	0	0	950.089878503	0	0
RP1-10C16	0	0	755.218845429	0	4234.70648985	1009.42805806	652.754296755	0	0	0	0	807.20185495	1663.22725131	0	0	0	967.874784103	0	0	894.417982095	0	0	0	0	0	0	973.685184211	0	1240.19932484	0	0	0	3124.43979771	2181.80072741	0	0	0	0	0	0	0	2366.90031918	0	2116.80681104	0	0	0	0	0
RP5-1018K9	0	0	0	0	779.096528502	0	480.372000077	0	0	0	0	0	0	0	550.262034781	0	0	0	0	0	0	0	0	0	687.518648943	0	0	0	0	0	0	0	0	1605.62095785	0	1263.52444983	0	0	733.644496419	0	0	435.459653792	0	0	0	0	2604.38369864	0	0
RP4-800F24	0	0	0	0	2405.03710972	0	741.443739249	0	0	0	0	0	0	0	0	0	0	0	0	0	0	0	0	0	0	770.454013141	0	0	0	0	1046.05574222	0	0	0	0	0	0	0	0	0	877.214528076	0	1009.05729831	0	0	0	0	0	0
RP1-206D15	22581.8592397	10881.3928183	0	21980.0348017	26551.6096913	59071.7299578	60027.2851296	6430.8681672	20523.3453053	6269.59247649	155436.615588	33741.0375369	6952.28991049	26089.7923687	12501.9534302	24565.713283	32365.7327804	2655.33722783	0	3738.66716516	271631.982475	49944.5061043	74306.9448414	37895.0994746	3905.105926	161610.433796	48840.04884	24073.1824747	10368.0663556	22805.0171038	34645.3661823	10321.2488711	58770.7125949	13679.8905609	74809.3799453	125594.330313	19467.8780013	59171.5976331	4167.10073966	143076.136944	77475.5871197	54415.0383379	14853.3234311	44241.2623507	13009.1877388	0	69033.530572	91416.9629253	69241.5882289
RP1-117P20	0	0	0	0	0	0	0	0	0	0	0	0	0	0	0	0	597.594770687	0	0	0	0	409.851518992	0	0	0	0	0	0	0	0	0	0	0	0	0	0	0	0	0	0	0	0	0	0	0	0	0	0	0
RP11-332H17	0	0	0	0	0	0	0	0	0	919.295084529	0	0	0	0	1833.1310015	0	0	0	0	0	0	813.693484919	0	0	0	0	0	0	0	0	0	0	0	0	10125.3390406	0	0	0	0	0	0	0	0	0	0	0	0	0	0
RP11-297H3	990.432422796	0	415.370364986	482.018307055	0	0	359.014863215	0	0	0	385.890306821	0	457.387494111	0	0	0	0	0	3086.29274515	0	576.46855364	1825.45709446	376.047291707	0	0	0	535.526851316	0	0	0	3545.57841047	679.029530994	429.610472185	1199.99040008	0	0	0	0	0	0	424.756508332	325.448793887	488.596165497	1164.24374607	0	0	648.811377556	0	0
RP11-576I22	4017.70389404	7857.83468824	11100.887117	3105.49942254	7363.86872654	3576.89326948	4711.71782807	6158.28819779	2255.31267091	4625.91595597	9576.37985908	3707.80632274	2510.24596454	5460.97171507	9911.28176179	4958.3184469	4191.7942769	2501.10256938	13256.0391691	586.917922316	3026.23366307	5314.17211297	3499.54214324	6706.1400526	2206.96724232	7121.55922979	1661.22615102	3627.98354407	7487.1436791	2267.37480362	3867.61457468	6643.19001123	6150.78101464	14746.5068317	10659.9527032	2929.31382654	1833.70907391	3144.00470457	6541.75940292	3117.02730023	1216.25725463	2795.69199395	3264.46668816	3055.91137116	1940.14573813	1730.66647245	2786.73144269	2391.86192897	3260.9853169
RP11-545I10	0	0	0	0	0	0	0	0	0	0	0	0	0	0	0	0	0	0	0	0	0	0	0	0	0	0	0	0	0	0	0	0	0	0	0	0	0	0	0	0	0	0	0	0	0	0	0	0	0
RP1-79C4	0	848.78259113	820.804673399	0	0	0	141.888349477	0	0	326.031850051	0	175.460413608	0	0	0	0	0	0	0	0	0	0	0	0	0	0	0	250.371112582	269.580508467	0	400.362468161	0	0	0	0	0	337.456716958	473.391716734	216.697906379	0	0	385.867524733	386.201857283	0	0	0	0	0	0
RP1-127D3	472.81949832	13670.0914803	1586.33908236	0	1111.87645274	2120.30617221	0	1615.79602191	0	1575.27449158	0	423.882381117	0	0	5497.0900761	0	3557.79097775	0	0	0	0	0	1436.16051104	432.790080798	0	356.18979502	511.30704397	1814.56149307	9117.64629263	0	967.207319438	7131.51617979	2871.26596988	5728.5973873	0	0	407.618886124	3430.9005199	1047.0102361	0	0	3418.03004635	466.49885148	0	0	6347.77008608	6814.14964368	0	3262.00949571
RP1-45C12	11761.3850207	11770.7374236	3035.39882105	4403.05184329	3191.29924175	3042.84323272	15085.528387	20869.403908	4933.49646762	753.55678804	7754.91097362	14599.4873958	7520.50591279	2090.52823467	20285.6215514	6748.8223305	10697.8083108	3191.51109114	0	0	526.581851883	16007.8545206	10992.1516038	10765.6532598	6571.0917024	9541.77662428	3913.46545193	12731.0099626	1246.16182159	0	7402.85602185	8683.7430406	2354.59585717	54807.2538497	0	2587.79526744	1559.9261219	22977.1366549	5008.53454286	4211.42475307	0	14269.6778858	8033.64849039	4962.96212267	3909.01073883	15458.8177096	1185.32847823	0	13523.747701
RP4-612B18	1779.5003341	2572.43329037	4477.75145233	1732.07524048	7323.13900076	1994.99256865	0	2280.44970468	3638.89101158	5187.60606802	693.325373958	1595.32092373	4108.91838681	3083.89980718	5172.20295577	829.642461433	0	1883.21789208	9241.853768	4419.22832761	517.867731403	1967.86864083	2026.92157232	814.422941643	0	1340.55355478	0	1138.21193734	0	898.542833088	0	1220.00577673	1543.7539426	2156.01112071	0	3393.29497638	4602.33522489	1076.04287385	985.130198501	2761.15476324	763.155901494	1754.19208052	3511.42397899	4183.57090787	2306.59357072	0	0	1200.64306443	1023.07311213
DNM3OS	27808.469769	39825.1985892	7026.41195658	23704.9480422	8732.74603585	8229.68767851	53030.070617	40211.3716283	12479.7762871	10286.2749442	33984.5570808	45447.4277975	12124.2320605	20254.810505	14271.9638172	27540.3984226	88656.7083677	9261.3873022	27090.6344985	2144.7149869	51924.4988632	36418.6648968	38298.4924166	23082.6672923	13530.7708771	23421.2362691	12514.468687	86946.2808977	27835.3318864	4709.61803428	29502.7084414	11486.4747648	113504.703459	89776.2436992	29710.3655306	12680.4739187	14369.3607704	79586.1852587	9370.71758804	12328.2582339	2148.14902332	23723.8579261	55299.48891	13535.6470401	8209.10194626	13491.6266538	27607.9811505	28668.3148228	16682.8057917
RP3-332O11	0	0	0	0	0	0	0	0	0	0	0	0	0	0	0	0	0	0	0	0	0	0	0	0	0	0	0	0	0	0	0	0	0	0	0	0	0	0	0	0	0	0	0	0	0	0	0	0	0
RP1-15D23	465.797426562	0	0	906.767112282	0	0	0	0	0	0	0	835.174196458	860.431919615	1614.46734955	0	434.330149983	500.707499697	328.630845028	0	0	0	686.805639498	0	426.36250534	0	0	0	1191.74170667	641.588264581	0	0	638.691143014	0	564.351920828	0	1332.3302367	0	563.324425296	515.730289562	0	0	0	919.141301431	365.026917085	402.51199687	0	0	628.554475559	0
RP3-471M13	0	0	0	556.738470155	0	0	0	0	779.762359623	0	0	0	0	660.835672967	0	0	0	0	0	0	0	421.686137321	434.340336926	0	593.481143769	0	0	0	0	0	0	0	0	0	0	0	0	691.741847476	0	0	0	0	0	0	494.270050868	0	0	0	0
RP3-395P12	545.455537192	0	0	1592.75614505	0	611.508591696	790.873321866	466.004939652	0	0	0	489.000544013	1007.5782479	630.188221467	0	0	0	0	0	0	0	0	0	499.27667292	0	0	589.855662319	697.773405064	0	0	0	0	0	0	0	520.059338771	0	0	603.927643429	0	467.847748307	0	0	0	0	0	0	2208.1392011	0
RP11-296O14	2382.05266242	1721.73936998	0	0	0	0	0	1017.54243152	0	2976.07237808	0	0	0	0	0	0	3840.87018755	0	0	1183.12252062	693.221678428	3512.27187794	0	0	0	0	0	1523.61914397	0	0	0	0	0	2886.05286094	7284.26289633	1135.57260681	0	0	0	0	1021.56628586	0	2350.20940366	0	1029.20789073	2907.26409006	1560.43242703	0	1369.49343807
RP3-436N22	0	0	466.294649024	541.113609102	1307.31706998	623.251001876	0	0	757.878334759	0	433.200344438	0	0	642.289324686	0	0	0	0	0	0	0	409.851518992	0	0	0	0	0	0	0	0	0	0	0	673.554434312	0	0	479.268291514	0	0	431.302978158	0	730.697439746	1096.99582209	0	480.398365541	0	0	750.1802308	639.231796796
GAS5-AS1	20065.532946	15679.2403722	30476.453869	27976.5092337	28056.4559659	59582.4365569	40102.0636836	21775.9945143	25875.9757091	51493.7710605	84940.3505332	27226.1974361	20536.3030497	36340.2487365	17563.9835655	23261.0706262	21569.3824365	22574.1925709	42810.8234775	46868.0177764	18623.0907386	39981.1928469	21414.1051416	39215.5208082	6189.64916225	40036.9647405	57472.6799511	33300.0795039	31373.1114507	30669.5715132	16085.7447852	14872.116529	27757.5411711	39423.3157374	79602.0890573	29472.5270805	38337.3197912	29513.6543282	18613.8505662	22299.1097396	57213.5999983	37778.3210886	33173.8491617	59923.323645	19213.8579716	35079.8695823	35525.6950247	22685.925798	38661.5496235
GAS5	853375.778577	969765.551087	1895132.15206	1597098.82912	1822269.6599	629715.750563	484910.331416	537086.41468	738467.382026	333163.830443	834517.811639	1266566.62525	1112730.17942	1774766.92786	439083.341005	262986.606772	1526475.27916	558783.57912	4049698.87269	886530.550592	321860.286091	1156797.84174	337350.979376	282071.382134	1550749.72038	573769.474137	1272114.46407	1027369.96868	624196.999543	508941.490675	514077.482842	522316.023153	747964.72867	451852.072322	888304.926792	680522.924449	2584993.91729	1078434.11317	598841.41172	408113.46455	619313.940002	751219.352032	653693.496087	731790.20016	611317.173765	1352994.74856	533022.401336	789572.440579	887330.66711
RP11-160H22	4493.90233627	1624.08848034	1884.66553665	2187.06813947	1320.97560653	3778.57547705	814.481480727	1919.66213946	9189.55759938	1871.52014224	875.452636371	4028.78060142	3112.96563156	1297.99962034	932.98159927	4190.3135664	3623.02978885	5548.46584919	0	1116.0200493	3923.42776806	7454.40389617	5118.73328414	1028.3609084	12822.7358764	5924.44638164	3644.77976418	4311.61477159	7737.36295196	11345.7796536	3447.30011764	9242.90943682	2923.9160495	0	25766.7209915	1071.16699627	4842.75572172	4076.11464752	2487.82133711	2614.85477206	1927.25341094	738.331592101	2216.91394494	2641.26939407	970.834905884	0	2943.86057876	3032.07173882	0
RP1-102G20	0	0	0	0	1324.93062332	1263.29619243	816.920048035	962.704815449	0	1877.12349595	0	0	0	1301.88584674	0	0	0	0	0	0	2623.44970519	2492.24082357	1711.3529443	2062.87966656	0	0	1218.56409282	1441.50793262	0	1137.97490538	0	0	0	0	0	2148.74816618	0	0	2495.26990399	874.227892853	0	0	1111.77570592	883.059128756	0	0	0	1520.57489896	0
RP5-1114G22	0	0	0	0	0	0	0	0	0	0	0	0	0	0	0	0	0	0	0	0	0	0	0	0	0	0	0	0	0	0	0	0	0	0	0	0	0	0	0	0	0	0	0	0	0	0	0	0	0
RP3-518E13	888.699694598	2569.39617905	0	432.507571856	0	0	322.138484113	0	0	370.105813252	692.506807991	398.359356988	3693.66051915	2566.88236607	1476.02755965	828.662954395	0	1253.99632955	0	441.401082073	1034.51263463	0	674.842837539	406.73070167	0	0	961.039922079	1705.30218239	612.046420049	448.740989842	0	0	1156.44849655	538.366413258	10191.0879955	0	383.075127928	537.386228618	0	0	1524.50978197	876.060507747	0	0	0	0	5821.68414336	1798.83831022	0
RP11-222A5	0	0	0	0	0	0	0	0	0	0	0	0	0	0	172.774370235	0	0	0	432.206096613	0	0	0	0	0	0	0	0	0	0	0	212.796303558	0	0	0	0	0	0	0	0	0	0	0	205.269809717	0	0	0	0	0	0
RP11-318C24	4401.92187909	9545.08141954	9230.45255524	8569.21434765	10351.504753	7402.47242579	9573.72968574	9401.85404562	15002.4453986	14665.7133953	5145.20409095	5919.48026963	14229.8331501	22885.7827796	12794.3967853	10261.3672861	26025.0775281	13975.4590938	13716.8566451	15304.4854714	1281.04123031	16226.2852841	10027.9277789	4029.25034286	27404.2521123	1658.05308091	16660.8353743	16893.4613858	12126.3933984	11113.5560935	2251.16089553	15089.5451332	5728.13962913	13333.2266675	6730.4885241	2098.48505118	24666.901951	23956.1124021	14621.4061041	5122.66870549	9439.03351848	8678.63450365	15200.7695932	1724.80554973	5705.78409598	18803.7080912	11534.4244899	5940.02358189	20246.0784295
RP11-492I21	4188.47415682	5189.85349044	19071.3770124	1747.22057247	6331.86240652	4024.87371959	3904.0725984	2555.98893768	8157.13247428	3987.0222426	33104.3576408	7509.92886354	1657.93877039	6221.73108952	993.795980145	6695.17509417	3859.18912326	4643.67400733	11187.197868	1188.76539433	3482.63991071	4852.40741166	4089.29010378	5476.9619128	3725.06129666	2704.55081242	11000.011	3061.77201586	3296.68246602	10876.7967109	5508.00734217	4102.2451793	5190.84195327	9424.40791157	4574.37813045	7986.92084662	5158.42024412	8683.61467039	3312.48071515	4642.16400974	13343.7020741	10617.1848181	3542.12800424	7033.58701919	2068.23334481	4381.69532174	4703.62461313	5651.99382156	9632.17642294
RP11-195C7	0	0	1000.57520567	580.56087696	0	0	0	0	0	496.798136013	0	0	0	0	0	0	1282.31904835	0	0	0	347.160143238	0	0	0	0	0	0	0	1643.11669661	0	1220.12207016	0	0	1445.31331863	0	0	1542.62107776	0	0	0	0	783.965398903	0	467.41957053	0	1455.93574082	781.452689291	0	0
RP1-35C21	0	2216.16961676	0	5222.68308255	0	0	0	3929.24735267	1044.97684854	638.451372351	1791.91425571	3435.95086934	1415.94499195	4428.00277813	0	2858.97157789	4119.87433559	2163.20751758	0	17513.104847	892.29348425	565.110953885	13387.589937	0	0	1732.34466498	828.921399186	3922.31079018	4223.24495137	1548.20211159	784.009191724	0	17954.3928498	1857.4189492	7032.05827467	0	5286.59280415	0	0	1784.06588317	11176.8922355	2014.99864239	1512.55839421	600.696026486	1324.76453552	935.535083969	2008.54031341	1034.36255856	7051.07823105
RP11-63B19	0	0	0	0	0	0	0	0	0	0	0	0	0	0	0	0	0	0	0	673.229381481	131.4874252	0	0	0	0	0	0	0	0	0	0	0	0	0	0	215.39072254	0	0	0	0	0	0	0	0	0	0	591.952757434	0	0
RP4-798P15	1007.99014589	971.42902344	2375.36119959	794.245189026	4176.37868716	1076.24264321	904.748590376	1394.27061398	523.487955753	319.836371712	2094.56593015	2151.57744783	4167.29531683	277.27960261	1355.26851367	1163.67909589	1393.11756324	304.783000261	0	1144.34398627	2318.81369491	743.127030418	1895.34357458	878.716756319	697.2514088	506.233780857	2076.26785869	3499.9908202	1851.20429765	775.581927603	1227.35784063	2698.45175179	5205.07522734	1686.50608454	2128.33137298	411.88222086	1531.07912691	4179.56405638	2178.94567435	446.869709802	0	5835.74804495	2888.83028089	1918.38148186	1451.73310439	2577.6431519	2452.59140808	3497.65194205	3753.05126863
RP11-21M7	0	0	0	0	0	0	0	1033.9016346	0	0	0	0	0	0	1004.98017928	1128.42045397	0	0	0	0	0	0	918.958011889	0	0	0	0	1548.1146286	0	0	0	0	2099.7039155	0	0	0	0	0	0	938.881402614	0	0	0	0	1045.75464139	0	0	0	0
C1orf220	7866.3533688	14508.5237577	4209.08636519	6072.56216744	5262.48120008	17029.6879158	8455.93205757	2201.55847165	3882.79505776	5422.35024994	8137.76603791	13374.8256903	9269.71988065	3603.99534223	4955.72928766	2908.68162425	14724.9504992	4401.64008937	563.503300016	4984.88955354	22261.0343092	12298.6471488	17817.1884374	3600.18963068	3236.6643711	18493.1174441	22880.02288	16829.5401805	2428.5560833	3424.17674231	1942.0825888	5950.9903401	8236.13589918	1807.55310714	7258.01330031	12413.956973	17187.8562534	8037.16780048	3754.1448105	2735.78198974	7445.10146495	5080.51954997	18600.10772	11903.9552751	1523.59856401	2151.89925801	888.462426924	23060.134792	2495.19236861
RP5-1098D14	2609.1114084	1885.85664095	3282.64967823	634.89413061	1533.88848592	13162.8019218	945.758391832	2786.33802738	1778.45279942	2173.16896932	5082.78393734	8771.50022623	1204.90293076	2260.81389677	541.679091431	1216.42551538	1402.32811007	1840.78837284	5420.17905562	5831.54323854	3416.85000598	3366.18084662	990.627180928	2388.22117376	4737.56351508	6387.95840358	8464.47986829	5006.55441415	898.445958026	2634.89510153	3335.77567709	1788.77796726	2829.32373363	0	0	9328.62072145	2811.65193548	1577.69891036	0	2024.20877791	13986.78277	0	2574.23283035	511.164209713	0	4776.57947552	854.58690978	1760.38827124	3000.06881408
RP11-428K3	3801.65980467	2473.04382234	1275.48071672	5180.4795829	10951.4215057	17687.4227507	5374.34370995	2598.33057261	7514.86128603	7282.85994744	4739.82437469	4430.64129272	2457.88027139	8784.441875	789.264736757	1063.45079147	7355.84835919	3486.80646078	1579.5168258	8874.61397789	19582.4620797	14013.610018	5051.94846435	3827.78782572	8480.78559686	5871.01522741	9250.00925001	5592.75956483	1570.91914479	2303.53708119	2916.27661467	1824.46318429	4287.42572241	690.903563681	12206.6587323	3262.19039774	9504.51956292	4137.87396036	631.378899949	12387.5443242	1304.30281346	3872.5119111	5063.63298788	13555.4036159	985.54452567	2783.92561351	249.038710577	4360.51731125	10709.7153511
RP11-545A16	228.515070226	0	0	0	0	0	0	0	0	0	178.067172547	0	0	0	0	106.538786031	245.641566336	80.6113305352	0	113.499306775	0	0	0	0	0	344.295175271	0	292.327656038	0	0	0	0	0	0	0	0	98.5017101867	0	126.505790518	0	196.001788908	75.0883677456	225.460282804	89.5390859152	0	0	0	0	0
RP11-12M5	10661.8787723	9247.64262177	2682.84541691	1037.77312567	7521.70246214	1195.30008009	1545.8996943	2732.66352714	0	7104.35408101	3323.24796809	4779.1837871	6893.20529369	3695.43801257	3541.62986692	3976.64318625	0	1504.44035571	0	10591.1251138	0	2358.09754978	809.620231438	0	4425.04920793	2409.57855668	2305.95131445	2727.83937391	4405.69391882	2153.44826287	2181.01140587	4385.79980359	5549.64236024	0	3260.37829354	3049.6397486	6434.14287106	5157.68992226	3541.44538781	1654.34626749	2743.46979886	2802.73182271	4207.74034876	6684.23227206	2763.99172922	19519.0251939	6984.37176973	2877.46184845	0
RP11-533E19	0	0	0	0	4949.96452113	0	0	0	0	0	1312.19970105	0	0	0	699.214397664	0	905.082012875	0	0	836.390864688	490.062752535	620.737088048	0	770.69553538	0	1902.86628749	0	0	0	0	0	0	0	0	0	0	0	1018.26875982	0	0	722.181087991	0	0	0	0	0	0	0	0
RP11-502H18	0	0	0	0	0	0	0	0	0	0	0	0	0	0	0	0	799.548734694	0	0	0	0	0	0	0	0	0	0	0	0	0	0	0	0	0	0	0	0	0	0	0	0	0	0	0	0	0	0	0	0
RP11-46A10	3504.32328364	1013.16506688	7642.19591445	2728.74423361	7416.65075177	3142.94918637	508.102972148	598.77729676	0	8756.41407331	2730.69490861	3769.94832815	3236.63403654	0	5238.24864395	3267.58623078	1506.78458009	0	0	0	2855.50531226	1033.40587843	2661.04228769	641.528685875	1454.4156149	2111.93353323	2273.74529051	0	1930.73861371	0	0	2883.03041093	1824.04446291	1698.31043586	0	1336.46533986	604.21719433	4238.04595568	0	2174.98783026	2404.58060583	3684.78336468	3457.47752121	2196.95902424	1211.28377457	6843.16910583	1836.48658079	945.757944603	8864.72847437
RP11-540K16	564.264348819	0	0	0	0	0	0	0	0	939.96888703	439.695102225	0	0	0	0	0	0	0	0	0	985.268592429	0	6427.19509065	0	0	1275.23422865	0	0	0	0	0	773.706811928	1958.0447308	0	0	1075.98483884	972.907446342	0	0	0	1451.94128785	0	1113.44253607	0	1462.80221951	0	0	761.427310722	0
RP11-33M22	0	0	0	0	0	0	0	0	0	0	0	0	0	0	0	0	0	0	0	0	0	0	0	618.493544551	0	0	0	0	0	0	0	0	0	0	0	644.23867819	0	0	0	0	0	0	0	0	0	0	0	0	0
RP11-538D16	4125.79645062	4417.94267896	4998.61048241	1338.61356892	21380.7115528	3254.923929	1661.70095033	2872.08890943	0	1400.03080068	1547.94812481	3561.78228161	1129.07672115	1059.26887409	2284.15714316	5129.43378104	6241.86888782	2156.18126498	634.884960432	6527.10873332	3201.82290451	3041.68733888	3481.07115344	1818.31577592	0	1956.94693715	495.737401949	3714.09230223	1894.2873975	28548.7086493	2813.26562584	1257.15576993	1988.45285542	1295.97014381	934.56235292	291.385256802	2107.76862918	5359.24398439	2707.00819466	3437.99081209	1048.52601326	7029.58823986	2110.70369504	119.748984574	132.046160565	2424.49063783	400.40328619	206.200575011	5622.54066008
GS1-122H1	0	0	0	0	0	0	0	0	0	0	0	0	0	0	0	0	0	0	0	595.329166426	697.637103132	441.83037955	910.178158273	0	0	451.476237	0	0	0	0	0	0	0	0	0	0	0	0	0	0	0	0	0	0	0	0	0	0	0
RP11-317P15	5196.89105566	9094.18731179	16059.3774835	8519.393334	31517.1723565	3373.07428123	4560.74114026	8178.79309056	1118.64164091	1594.73645841	4902.15302561	6620.6977725	13389.2211212	21488.685575	6132.86232951	6376.06760876	2646.1809141	2894.62633848	8523.19217412	1358.52731292	3979.97911307	9679.16784968	2077.00539024	10014.5611719	5959.82735799	5563.39467628	3253.63697457	9447.3245177	8665.17173617	12706.2837545	6154.70006468	11251.3614147	6406.69105322	18557.991071	8782.40708213	3390.21240463	3537.04178803	4631.05079866	6359.67409396	12095.6036513	469.207770831	5931.87191183	6206.87570704	1071.73600656	4254.45819948	4673.59605175	7167.10242649	2583.65124547	7548.1382517
RP11-181K3	7071.56343625	12494.2923801	7249.4702532	16060.5682267	5543.13354725	880.878764656	5696.26922847	6041.52541804	1071.15580925	1308.89195751	13469.9079959	4930.84055863	11611.3401428	0	7177.53067497	732.648770744	5067.70346249	1663.05045584	1632.27730433	0	9146.47391997	12743.9008849	2386.60494111	5753.66854806	815.262197494	7102.97478503	11895.627762	14072.006457	33550.1103366	1586.98796825	3214.60136231	2154.7492424	27947.1029505	7615.80546187	0	8989.7522443	9483.30869931	11402.9094523	4349.79200382	2438.34752579	11456.8978865	34080.3997941	6201.80519045	17240.853804	7468.74035111	12466.6397515	41177.1730224	30747.9926332	34331.6851866
RP11-444D13	0	0	0	0	0	0	0	0	0	0	0	0	0	0	0	0	0	0	0	0	0	0	0	0	0	0	0	0	0	0	0	0	0	0	0	0	0	0	0	0	0	0	1020.14584005	0	0	0	0	0	0
RP11-382D12	0	0	0	0	0	0	0	0	0	0	0	0	0	0	0	0	0	0	0	0	0	0	0	0	0	0	0	0	0	0	0	0	0	0	0	0	0	0	0	0	0	0	0	0	0	0	0	0	0
GS1-115G20	1779.5003341	0	0	2598.11286072	2092.32542879	0	1935.11557478	760.149901561	0	0	693.325373958	1595.32092373	821.783677363	33922.897879	0	0	2869.30255146	0	0	1767.69133104	3107.20638842	1311.91242722	1351.28104822	814.422941643	0	670.27677739	3848.7036123	1138.21193734	1225.53975835	0	2730.13129884	0	1543.7539426	2156.01112071	0	4241.61872047	1534.11174163	2152.0857477	0	690.288690811	0	2923.65346754	0	6275.3563618	768.864523572	9773.35587721	0	9605.1445154	15346.0966819
GS1-120K12	0	0	0	0	0	8895.1799727	0	3831.40633243	0	0	0	0	0	0	0	1608.33529416	0	0	0	0	0	254.325828009	0	0	0	0	0	0	0	7315.99998746	3528.40067036	0	0	0	0	0	0	0	0	0	0	0	0	0	0	0	451.967595731	0	0
RP4-635A23	1160.42442136	559.167154074	4542.17953078	1129.49819125	5457.67927879	2168.24731896	2523.80438273	991.397970278	0	322.178441752	1507.07416847	1387.09301282	3572.6052983	0	963.665475094	1082.0311239	0	545.804157827	1607.11372821	384.241229718	675.410227287	2851.69042505	2643.53902906	708.121077728	0	1165.57893869	2509.76612744	2474.11947325	532.788610258	390.630645834	395.630537653	1591.14833573	5033.46288069	468.649899311	9462.80400921	1843.99251671	2334.27793781	6081.35638573	0	600.189344734	331.772812263	4575.68293974	1908.1864634	3334.38770714	1671.27283387	944.188543122	2027.11879524	2609.82536615	2223.84340406
GS1-279B7	7006.78256552	12299.4466696	13433.254357	4871.46161386	12357.7970638	5610.91659934	5805.34672433	4275.84319628	4776.04445269	5002.33442273	5849.93284277	3140.78806859	6933.79977775	10408.1618492	5403.10487343	4200.064961	5379.94228398	6002.75703099	0	7954.61098969	9030.31856633	9224.3842539	1520.19117924	5497.35485609	2077.18400319	7917.64443292	3247.34367288	5121.95371803	5514.92891257	7076.02481056	5630.89580386	13725.0649882	3039.2655745	10308.4281709	15304.7012981	14315.4631816	4746.15820067	5447.46704888	6095.49310323	5436.02344013	6868.40311345	2631.28812079	3456.55797932	7844.19545225	5622.32182862	3054.17371163	655.713626254	5402.89378991	2877.39312786
GS1-204I12	417.718446906	0	0	0	491.150752707	0	302.831627129	356.873927148	0	347.924110793	651.002515392	374.484323384	385.809650971	0	0	778.998360014	449.025149562	0	0	0	243.127691879	0	0	382.353944856	866.838163374	629.360880879	0	1603.09761208	0	0	0	0	0	0	0	0	0	0	0	0	0	0	0	0	721.93050715	0	0	0	0
GS1-174L6	0	0	0	1037.77312567	3760.85123107	0	0	910.88784238	0	1776.08852025	830.811992023	2867.51027226	984.743613384	0	3541.62986692	4970.80398281	5730.47676707	0	2214.90319766	0	1241.12209849	0	3238.48092575	0	0	0	1152.97565722	4091.75906086	2937.12927921	0	0	0	9249.40393373	2583.54873671	0	0	919.163267295	3868.2674417	2360.96359188	0	914.489932952	1401.36591135	3155.80526157	835.529034007	0	3903.80503877	4190.62306184	0	0
RP11-295K2	4952.16211398	5011.16774526	2907.5925549	5784.21968466	7569.5378506	3886.29802354	3231.13376894	2538.50059232	0	3712.25870318	8489.58675007	5327.53224267	12806.8498351	2860.72284745	4112.48468099	1847.04611151	7452.6358376	2445.70534142	4115.05699354	5411.22879167	3747.04559866	6936.73695893	3384.42562537	4986.19729929	0	1492.24777282	4819.74166185	6335.04801966	4774.76740062	4500.99021785	4052.08961196	679.029530994	7732.98849933	4199.96640027	0	14636.933232	11527.0330271	7785.73653068	3838.11910232	1921.00076456	8495.13016663	7485.3222594	2442.98082749	6209.29997904	1283.8014216	2417.61961173	3892.86826534	6682.52652963	3416.52573498
GS1-304P7	1111.85914524	0	932.589298048	1082.2272182	1960.97560497	1246.50200375	403.029979385	1899.81334334	757.878334759	926.084560781	2599.20206663	2491.95255073	7188.48292074	642.289324686	2308.33704399	518.37335478	1792.78431206	1176.66346876	0	7731.36489102	323.571714008	819.703037983	844.301157157	508.863965015	0	418.799227232	1202.36457016	1422.34460707	1531.47213525	0	568.609325165	762.278350895	4340.52530243	0	0	6360.548486	8147.56095574	1344.65623527	3077.62240743	0	476.831530771	2557.44103911	548.497911046	2613.95937079	960.796731081	678.504765478	1456.71092154	3750.901154	1278.46359359
RP11-201A3	0	0	0	0	0	0	0	0	0	0	0	0	0	0	0	0	177.677496599	0	0	0	0	0	0	0	0	0	0	0	0	0	0	0	0	0	0	0	0	0	0	0	0	0	0	0	0	0	0	0	0
RP11-669M2	0	0	0	0	0	0	0	0	0	0	0	0	0	0	0	0	0	0	0	0	0	0	0	0	0	0	0	0	0	0	0	0	0	0	0	0	0	0	0	0	0	0	0	0	0	0	0	0	0
RP11-316I3	0	0	0	0	0	0	0	0	0	0	0	0	0	0	0	0	0	0	0	0	0	0	0	0	0	0	0	0	0	0	0	0	0	0	0	0	0	0	0	0	2078.207809	0	0	0	0	0	0	0	0
RP11-398M15	0	0	0	0	0	0	0	0	0	0	0	0	0	0	0	0	0	0	0	0	0	0	0	0	0	0	0	0	0	0	0	0	0	0	0	0	0	0	0	0	0	0	0	0	0	0	0	0	0
RP11-445J9	0	0	0	0	0	0	0	0	0	0	0	0	0	0	0	0	0	0	0	0	0	0	0	0	0	0	0	0	0	0	0	0	0	0	0	0	0	0	0	0	0	0	0	0	0	0	0	0	0
RP11-547I7	0	0	0	0	0	0	0	0	0	0	0	0	0	0	0	582.954752801	0	0	0	0	0	0	0	0	0	0	0	0	0	0	0	0	0	0	955.908253838	0	0	0	0	0	0	0	0	0	0	0	819.097420171	0	0
RP11-161I10	0	0	0	0	0	0	0	0	0	0	0	0	0	0	0	0	0	0	0	0	0	0	0	0	0	0	0	0	0	0	0	0	0	0	0	0	0	0	0	0	0	0	0	0	0	0	0	0	0
RP11-463J7	0	0	0	0	0	0	0	0	0	0	0	0	0	0	0	0	0	0	0	0	0	0	0	0	0	0	0	0	0	0	0	0	0	0	0	0	0	0	0	0	0	0	0	0	0	0	0	0	0
RP11-309H21	0	0	0	0	141.60858502	0	0	0	0	0	0	0	0	0	0	0	0	0	0	0	0	0	0	0	0	90.7286645875	0	0	0	729.76054732	0	0	0	0	736.584664077	0	0	0	0	0	206.601565652	0	0	0	0	0	0	0	0
RP11-541F9	0	0	0	0	0	0	0	0	0	0	0	0	0	0	0	0	0	0	0	0	0	0	0	0	190.400093905	0	0	0	0	0	0	0	0	0	0	0	0	0	0	0	157.393928002	0	0	0	0	0	0	0	0
RP5-1011O1	2751.20117443	1590.84690326	5999.79416091	2142.30358691	3234.8452353	0	3590.14863215	940.185404562	0	0	2572.60204548	493.290022469	1016.41665358	0	9138.85484665	0	2365.91613892	388.207197051	8001.49970966	0	960.780922734	4462.22845312	835.660648239	1510.96887857	0	414.513270228	0	0	0	0	4502.32179107	754.47725666	2864.06981457	4666.62933363	364287.691367	0	32256.7179359	0	0	426.889058791	0	1446.43908394	0	1724.80554973	950.964015997	7387.17103584	0	0	3163.44975461
RP11-21J7	0	0	0	0	0	0	0	0	0	0	0	0	0	0	0	0	1008.90688218	0	0	0	0	0	0	0	0	0	0	0	0	0	0	1286.93876198	0	0	0	0	0	0	0	0	0	0	0	0	0	0	0	0	0
RP11-98G13	0	0	0	0	0	0	0	378.286362777	0	0	0	0	0	0	0	0	0	0	0	0	0	0	0	0	0	0	0	0	0	0	0	0	0	0	0	0	0	0	0	0	0	0	0	0	0	0	0	0	0
RP11-563D10	0	653.929856868	0	0	531.883206958	0	0	386.470442741	0	376.77839402	352.495953346	405.541316549	1253.41765213	0	0	0	0	638.302218228	0	0	1053.16370377	0	0	0	0	0	0	0	0	0	0	620.267360043	0	0	0	1293.89763372	0	0	1001.70690857	0	0	0	0	0	1563.60429553	0	0	0	0
RP11-476H20	0	1236.52191117	0	0	0	0	0	0	0	0	0	0	0	0	0	0	0	0	0	0	0	0	0	0	0	0	0	0	0	0	0	0	0	0	0	0	0	0	0	0	0	0	0	0	0	0	0	0	0
RP11-476B1	1818.18512397	876.118584403	508.343763912	1179.81936671	0	679.453990773	878.748135406	2588.9163314	0	504.798105998	0	2173.33575117	4478.12554621	2100.62740489	503.299252424	565.118778078	651.484154195	0	0	602.039801152	0	0	0	0	0	456.565341121	0	3876.51891702	834.787951339	0	619.884884278	1662.03685525	2103.08508123	0	0	1155.68741949	0	0	2684.12285968	0	0	0	1195.91976096	0	523.719313158	0	0	817.829333739	0
RP11-75C23	0	0	0	0	0	0	0	0	0	0	0	0	0	0	0	0	0	0	0	0	0	0	0	0	0	0	1485.40294526	0	0	0	0	0	0	0	0	0	0	0	0	0	0	0	0	0	0	0	0	0	0
RP11-448G4	1594.7640706	0	4681.71682569	3880.65586189	4687.78419692	0	2312.29911901	3406.18017331	2174.08318912	3320.75872695	1864.04639736	2144.55747057	1472.94277765	6448.74811374	662.17973677	743.514324547	3428.57338776	3375.42867944	1656.48480672	2376.27150328	928.212077896	1175.71812863	6054.99876478	0	0	0	2586.86699365	2040.10020972	4393.24845577	1610.52380676	815.568883763	8746.82107721	2075.23702666	4830.46983082	0	1520.51247352	687.425070667	4821.67516567	0	2474.50945943	683.929971042	524.02771897	0	2499.5063475	0	9731.9433523	5223.48142948	2152.00006886	9168.64250913
RP11-553K8	0	0	758.849705263	0	0	0	0	772.940885481	0	0	0	811.082633099	0	0	6761.87385048	0	0	1276.60443646	0	0	526.581851883	0	0	0	0	0	0	0	1246.16182159	913.662544221	0	0	784.865285722	0	4149.92862123	862.59842248	0	0	0	701.904125512	0	594.569911909	0	0	0	0	0	0	0
MIR181A1HG	347.413219073	0	194.265524547	225.436254377	0	389.483933788	419.771224683	197.872866683	631.487547855	385.821075476	360.955856227	519.092885183	1497.41628841	668.969035096	1057.85759794	755.868101016	124.483587617	25491.2373871	0	0	202.207431123	683.00179288	175.87442566	318.000834752	0	174.47820113	250.461788923	296.285322766	638.034852654	350.846416981	118.44569635	317.576888342	401.85102629	280.61313971	531.190863517	0	898.517446214	280.102237317	128.218484297	89.8437280655	99.3276757945	380.524743621	914.050672684	363.005229544	400.282699657	0	151.722045213	468.804938079	0
RP11-16L9	0	0	799.193613644	0	1120.32108402	534.102440848	345.381387397	0	649.472952699	0	742.472489074	0	440.018348765	2201.67024209	395.631437665	444.226279982	0	336.118636434	0	946.498016495	0	351.227187794	1085.30104442	436.077094069	494.317205823	358.895033969	515.190388608	609.447657588	0	0	0	653.243599438	826.592300913	0	0	0	410.714725766	2304.63866147	527.481106286	739.220547374	0	626.179957858	940.083761463	0	0	581.452818011	624.172970814	0	0
RP11-382E9	0	0	0	159.553098154	0	0	0	0	0	0	0	0	0	0	408.382625116	0	0	0	0	0	0	0	0	0	0	0	0	0	0	0	0	0	0	0	0	0	141.317349022	0	0	0	0	215.453905361	0	0	0	0	644.290043915	0	1884.84288515
RP11-532L16	5823.81927524	3157.07722	0	4960.0336432	855.951311777	13058.1331766	1055.51758624	4353.58579985	0	2425.37426557	0	3915.78772188	3361.84231648	841.063583776	4231.80241835	4751.58864275	1565.07411898	513.604879657	0	723.146453608	1694.83984823	2146.76579	11055.935849	666.346043162	0	2193.63308964	3936.17414894	19556.5505597	4010.85739096	0	744.58126332	0	15156.856891	3528.01819752	0	0	3765.54700219	10564.7845796	806.015616956	0	1248.80056608	44492.6900424	2872.98325554	2281.94776793	0	0	0	7858.75460351	3348.23927606
RP11-469A15	1484.67187638	4292.46265021	3113.22956005	722.552097361	3491.3359226	1664.4612555	5381.68236772	1902.62371811	219603.842764	0	1735.3646934	1996.51109686	0	0	2465.86852667	0	1595.94343099	0	0	0	0	3283.66246577	20856.903043	679.488963146	0	2236.90001448	802.762143985	949.632444762	8179.93400838	2998.68732462	759.267284293	1017.87464212	3863.95217586	2698.20326644	7945.1624885	2123.3191938	0	0	2465.74008264	2303.68533501	0	1463.55670624	1464.82479597	6980.86979892	1924.43605604	0	1945.15442581	0	1707.13974923
RP11-92G12	16875.0306819	3696.12527795	17585.5170828	9456.98961125	11423.9262712	4013.025133	370.721869625	4805.67594016	42524.5945524	17888.7828813	3586.26317752	1833.75204005	472.302303702	2363.2058305	11890.4448385	1430.45690701	3298.13853061	1082.33854395	40367.814529	3555.79757556	297.63322063	5654.94860783	2329.85822036	0	7428.19062011	6548.8591117	1658.96905027	7195.78823973	8452.2280073	4647.761638	3661.19509776	3505.85899155	21293.7364474	0	3127.48243919	20964.8920942	17633.9474649	5565.89024559	3397.09299429	5950.92628151	3070.25084827	2016.36752734	2018.11459662	14827.2346646	883.776340954	1872.34127539	4689.77789212	20011.2615099	2351.95612191
RP11-168O16	321.862303873	1240.75174667	89.9890186401	0	0	120.279626075	155.559461826	91.6600365907	0	178.722704575	250.806698846	96.183117266	990.919314494	123.953783584	178.192038629	300.118666921	576.641476276	681.24387259	0	0	499.562258571	237.288607489	733.227900593	785.634901516	0	242.468993873	696.123843216	274.494669039	0	975.129009568	109.734467827	0	558.44462747	0	0	306.876519742	647.449382407	129.750893854	712.731027308	166.47213011	92.0225046556	282.030881817	211.706434309	84.0768953833	1205.24116737	0	140.563468342	0	246.727438102
RP11-567E21	0	1411.33499589	0	0	573.964757703	0	0	0	0	0	0	0	0	0	0	0	524.736264274	0	0	0	0	0	0	0	0	0	0	0	1344.75568815	0	0	0	423.481139897	0	0	0	420.836100331	590.35815258	0	0	0	0	481.625273383	0	0	0	0	658.71856842	0
RP11-134G8	0	0	0	0	0	0	0	0	0	0	0	0	0	0	0	0	0	0	0	0	0	0	0	0	0	0	0	0	0	0	0	0	0	0	0	0	0	0	0	0	0	0	0	0	0	0	0	0	0
RP11-25B7	650.024733441	0	0	632.701059347	0	0	1413.7372852	0	0	1624.24675557	0	0	0	0	0	0	0	1375.82239784	1350.36412569	0	756.677203397	0	1974.41065076	594.992926278	0	489.684070528	2811.74719862	831.543436087	0	0	0	0	0	787.558466372	0	1239.51966754	0	0	719.706518076	1008.60834616	0	0	0	1528.1955907	0	0	0	877.153741368	0
RP11-90L20	1456.35723861	601.514251978	0	1417.54416447	0	932.98159927	2111.61865374	888.732471974	0	1906.17792265	648.483434349	2238.21144523	576.475116956	480.740600124	0	387.991996889	670.93144238	440.354432476	432.206096613	620.0111385	1089.84104668	460.148388652	473.956785568	0	0	313.462771516	1349.91843118	0	859.706994662	1050.53515311	0	1996.92487832	360.977290061	252.070951923	636.215333124	1983.64258569	179.361323027	2767.73216807	1612.47679257	1129.87551879	1249.14572931	1914.19301656	1436.88866802	2119.53716808	539.352725491	253.923563421	1362.89841609	1403.73691612	1435.35630657
RP11-307B6	3365.40376151	8108.3404011	1411.39259638	0	1978.51040919	9432.36054255	813.267648416	3354.40217365	764.655190212	0	3933.6657208	2514.23528591	1036.10877951	0	2794.77349409	0	2411.75356039	791.4566998	0	557.178415075	1632.32526366	1654.06544475	2129.62698731	2567.07082202	9893.71098986	3802.89670868	1819.67395082	6457.78367429	1545.16637193	566.443544554	573.693760263	0	4865.9308325	679.577275751	0	4813.06779995	967.107700015	2035.0199805	0	870.319273362	0	7003.69684609	3320.41507402	3076.88858872	1454.08208705	8214.86246609	5144.07828405	3027.55300299	3224.73864703
RP11-465N4	49838.1977133	86951.7690959	66307.5249311	35127.9095005	72744.1361407	52662.3380794	49835.8531587	21534.1095401	46076.0035393	21948.3450471	93295.0020327	41084.9772139	59787.5768558	37063.1246233	75163.9513689	26173.5149134	80668.0173941	35970.3216555	28561.1261652	21623.9501181	112363.109557	43499.7812341	54810.1805995	42997.0687273	27341.6853266	82425.6798716	65665.2102619	75480.6025844	28405.6612483	30661.2355784	25194.4993377	45558.0239364	59635.4262759	23597.9847321	87588.5492862	52433.3799089	60744.5203998	56809.1676141	32347.3573398	80886.7049479	97286.6961549	57599.9783153	81388.0735952	22895.0216122	34156.5431499	43347.8828405	25517.9391112	81166.7605882	19760.7272343
RP11-510N19	0	0	0	0	0	0	0	0	0	0	0	0	0	0	0	0	0	3052.11175612	0	0	2517.9086251	0	0	0	0	0	0	0	0	0	0	0	0	0	0	0	0	0	0	3356.23122084	0	0	0	0	0	0	0	0	0
RP11-569A11	0	0	864.880759971	0	0	2312.00508641	0	0	0	1717.6965689	803.497625162	0	0	2382.62944007	1712.5963603	0	0	0	0	0	600.159042146	0	0	943.838094013	1069.89203452	0	0	0	2840.56612483	1041.32498191	1054.65346065	0	0	0	0	0	0	1247.0305086	0	0	0	677.646803709	0	0	0	0	0	1391.43018151	0
RP11-480I12	0	919.036555598	0	0	747.511534103	1425.47610902	0	0	0	0	495.399718217	0	0	0	6335.44937342	0	0	0	0	0	0	0	482.76341503	0	0	0	0	813.283191714	0	0	0	0	0	770.264108157	0	0	0	0	0	0	0	0	0	0	0	0	0	857.891919344	0
RP11-335O13	0	0	0	2075.54625134	2507.23415405	0	0	0	1453.49471001	0	0	0	0	0	6197.85226711	0	0	752.220177855	0	0	1861.68314773	0	0	975.923241685	0	803.192852226	0	0	0	0	0	0	0	0	0	1016.54658287	0	0	0	3308.69253499	1828.9798659	0	1051.93508719	1671.05806801	2763.99172922	0	0	0	0
RP11-74C13	0	0	0	0	0	0	0	0	0	0	0	0	0	0	0	0	0	0	0	0	0	0	0	0	0	0	0	0	0	0	0	0	0	0	0	0	0	0	0	0	0	0	0	0	0	0	0	0	0
RP11-203F10	0	0	0	0	0	793.12204562	0	0	2893.32875544	589.247413204	0	0	653.410705873	0	0	0	0	499.123539065	0	702.756985932	0	521.559169845	1074.42083345	0	2202.12740188	532.94563315	0	905.006859952	0	0	0	0	0	0	0	0	0	0	0	0	0	464.92684841	0	0	0	0	0	0	0
LINC00628	1167.92651874	422.086610484	244.904171753	852.600263837	0	2618.71794116	211.676723075	0	5174.62158589	486.391968696	1592.65820969	261.761346291	2427.09888264	2698.71139061	1454.84330065	544.513205875	1569.32373838	2059.99784936	3032.81935133	2320.3520032	2549.1627275	430.518973402	221.71911691	4543.45645722	2423.64991528	3519.34307942	315.748958107	1120.55155041	402.174800451	0	895.923614747	1601.43504594	253.300200823	0	2232.18296668	278.387078163	1006.87240762	1412.46279485	646.563342073	7701.88669607	2003.50626118	1151.31613664	1440.3921093	2059.32951206	252.311631863	0	0	394.004667379	671.46613876
RP11-739N20	0	2325.08393553	0	0	0	0	1166.03117967	0	0	1339.65651207	3759.9568357	4325.77404319	2971.06406431	0	1335.67878528	2999.47659133	0	3404.27849722	0	0	936.145514459	0	1221.35017819	0	0	1211.65417451	1739.31797863	0	2215.39879394	1624.2889675	0	0	0	0	0	3067.01661326	1386.60099724	0	1780.81228191	0	0	0	0	2520.86964961	0	0	8429.00251184	4340.78646369	0
RP11-430C7	20939.7425844	26287.4057835	37438.0668646	10190.8409281	1295.8325862	1853.3276498	4394.38397728	5178.59076422	751.220545581	4589.7455904	12881.8433317	19266.4782422	8652.19095742	0	4576.11765382	9248.75212497	4146.41525371	12829.5942194	2289.48998176	10947.7808643	5773.12577877	3656.25959768	10042.6099572	3026.36226338	1715.27346676	4981.44205275	12513.9217379	5639.39852995	5313.06475032	7234.38805146	2818.07110642	4533.49145144	9560.87727264	3338.18705731	0	4203.11500734	4750.58028338	6664.21867701	34166.5653618	4275.14079375	14179.2802196	23539.0489283	1631.03844412	12954.9816547	3333.24722445	16141.0621222	4331.74214005	17102.5715575	8870.6280674
RP11-23I7	845.762518342	1222.62840655	709.396578403	0	0	0	0	0	0	1408.89718573	0	1516.45112525	0	0	2809.42773713	0	0	0	0	840.149924754	0	0	1284.47614246	0	0	637.139498508	2743.82296854	0	0	0	0	0	0	0	0	0	0	1022.84524863	936.427132508	0	4352.56107414	0	0	662.790447201	0	0	0	2282.57085956	0
RP11-383G10	0	0	460.177080742	0	0	615.074239461	0	0	0	456.967381668	0	0	0	0	0	0	0	0	0	0	0	0	0	0	0	0	0	0	0	0	0	0	0	0	0	0	0	0	0	0	0	0	0	0	0	0	0	0	0
RP11-576D8	0	2263.02796914	1422.48152723	0	11043.9970986	146.253354686	94.5758391832	222.907042191	0	1412.55983006	101.655678747	116.95333635	240.980586152	150.720926451	1516.70145601	243.285103075	140.232811007	184.078837284	0	0	0	0	99.0627180928	119.411058688	0	98.276283132	705.373322358	333.770294277	0	131.744755077	0	0	905.38359476	0	0	0	0	0	433.320700831	101.210438895	111.89426216	0	0	0	0	0	170.917381956	0	1050.02408493
BLACAT1	2891.2422763	119753.471397	31842.2866305	978.848131896	23796.5328452	422.786501273	1093.59236891	4403.23304702	1713.70618782	732.918292175	489.773936513	0	3018.69635392	1742.80510145	54283.6989288	351.642045277	5269.97151986	354.754472656	1305.7128069	0	731.656814908	556.051058832	954.562263519	1265.70138526	3782.50072992	378.793689827	407.816039079	5789.14207809	4848.1272204	253.896872676	771.439906085	7584.08400683	11886.7506733	3350.67459741	576.609988788	359.560063879	1192.0878313	4864.83511706	5288.9054144	3510.92724905	215.641246715	4295.83711904	2728.56642856	295.532814634	18901.1244703	18870.9987729	1152.86457201	4749.63809454	4625.35659512
RP4-681L3	0	0	0	0	9620.14843889	0	0	0	0	0	0	0	0	0	1358.90798155	0	0	0	0	0	0	0	0	0	0	0	0	0	0	0	0	0	0	0	0	0	1410.7157972	0	19929.6122332	0	0	0	0	0	0	0	0	0	0
RP11-38J22	0	0	0	0	1134.68417484	0	0	0	0	803.793907242	1503.98273428	0	891.319219293	0	0	0	0	0	2004.77135583	958.63260645	0	0	0	0	0	0	0	0	0	0	0	0	0	0	0	0	0	0	0	0	827.730631621	0	0	0	0	0	0	1302.23593911	0
C1orf147	3232.13634157	10642.5836247	1656.72531073	873.888152104	2533.55054307	3019.61542178	2082.83432094	2301.12172013	244.791809462	1346.04800306	1679.0646938	2575.65172037	3980.31865104	1244.74200233	2385.86897523	2344.05661098	3860.41660072	2153.66091952	373.025204567	1248.60067539	1881.22371512	1853.32666842	2045.29538429	2794.139014	1304.18613941	1217.43496733	1359.25708445	1607.94157751	494.659654371	544.01281259	734.634567054	2462.1299788	2025.07226392	1305.33306879	549.099970239	3252.85206645	4489.25303783	2171.59415859	5169.11351294	2368.25666776	1232.11811577	1180.06242058	2657.44097646	1266.44834973	1551.66838488	1095.77224768	470.512067694	6542.24448416	619.408291647
RP11-534L20	3697.09548784	5344.49549031	2480.79746475	1439.42598571	7824.63939823	4144.80283173	1608.16088041	631.715929981	0	1847.62057264	1152.36398108	2651.55501272	13658.7228104	6834.26126228	1228.08972792	689.467114315	2384.50880013	5738.44980474	1536.07235515	1469.02442639	3442.95560524	1635.38002961	1122.97030137	1353.6381309	1534.42276071	1114.05531173	3998.0393615	0	5092.37050866	746.726165808	6050.27132631	6083.25080812	2565.84643505	895.867096325	0	3524.96015473	11474.1913564	894.236022867	9005.52222716	1147.31676312	2536.85615978	971.870661509	2188.60364899	2897.26668963	2555.83256166	0	968.75569144	997.783921909	0
CH17-76K2	0	0	100.695846057	0	141.156882995	0	87.033906234	0	0	399.97400169	0	0	0	138.701713816	99.6965983271	0	0	0	0	119.255730946	0	0	91.1629798079	0	124.564782328	90.4392589588	0	0	0	0	0	0	104.147993257	0	0	0	103.497490703	145.188560013	132.921873673	93.1394310089	205.942549494	78.8966773059	0	0	103.741529018	0	629.150426721	0	0
RP11-343H5	5215.20998608	15078.1424734	3645.28264884	107446.66743	52122.0975465	33131.6202337	44740.0508524	2227.78342975	0	83256.713025	6095.81916549	80261.5904458	802.804839548	8033.80827367	19489.1883728	810.482127451	62601.1575141	2452.96741601	3611.36641465	55259.7456282	9612.24701451	235176.209139	3960.22090112	38189.4766908	2705.61611501	3928.78166516	36658.2352726	2223.85057503	65847.9964849	877.791266504	1778.05317846	5959.15061843	52783.5499313	2106.21871607	37211.9850501	1657.46394343	119894.552741	7358.34399417	40419.9147958	63388.5887391	3727.65526942	4569.81216358	18866.8080534	68797.0361419	4506.64702269	7425.94476582	297224.537765	3518.74376156	278845.310564
RP11-164O23	0	0	0	0	0	0	0	0	0	0	0	0	0	0	0	0	0	0	827.365956373	0	463.614921446	0	0	0	0	0	0	0	0	0	0	546.097823868	0	0	0	0	0	0	0	0	0	0	0	312.107670904	0	0	0	0	0
RP11-6J21	0	0	344.254610021	0	0	460.131873795	297.547760135	350.647119259	0	341.853461095	319.821846439	0	0	0	0	0	441.190468653	0	0	0	1194.42775563	0	623.328117116	375.682556505	0	0	0	0	1130.65063856	0	419.791181174	0	0	497.26974049	0	0	0	496.364379105	0	0	352.033747363	809.185659828	0	0	354.667059401	0	0	0	0
RP11-357P18	16811.6627385	13327.3543163	20469.2600613	1583.57599436	13390.5812564	4255.88832549	20444.1893289	5559.82838663	4435.88155013	3161.89822301	14790.6083018	8751.27774732	6511.51072308	10024.8962032	450.358552962	1517.02634519	15739.8196158	0	19152.2105031	6464.55417606	6312.91211479	21589.8441373	7000.76514245	15388.3689247	11816.6029461	1634.16182614	1759.3677536	5550.01325066	8963.74612878	1095.34183976	1664.04256399	3718.02913225	8468.40239119	19054.6026064	0	4653.55690744	3740.22632109	8526.16680593	3602.68075475	13884.3513473	6512.11707298	9979.17915549	2675.31041627	8499.76221915	17807.9659249	17208.9926253	22736.4448158	10245.256812	18083.6280497
RP11-78B10	0	0	0	243.249610466	0	0	543.528478175	427.016478566	0	0	0	0	0	0	207.535747514	0	0	0	0	0	0	0	0	0	0	188.264991259	0	319.696978416	0	0	0	0	216.802097517	0	0	0	0	0	0	0	0	656.948428563	0	195.84445485	0	0	0	0	0
AL035209	0	0	0	0	0	0	0	0	0	0	0	0	0	0	0	0	0	0	0	0	0	0	0	0	0	0	0	0	0	0	0	0	0	0	0	0	0	0	0	0	0	0	0	0	0	0	0	0	0
RP11-328D5	0	966.375916366	0	0	0	0	0	0	0	0	0	0	0	0	555.14890898	623.337053617	718.599750897	0	0	0	1167.27202691	0	0	0	2774.4979936	0	0	0	920.787420571	0	0	0	579.935983766	0	0	0	0	0	0	1037.27217127	0	3075.2887806	0	523.875220257	0	6527.14353433	3503.35095519	0	0
RP11-565N2	0	1950.07039754	0	0	0	0	0	0	0	0	0	0	0	0	2240.49344628	0	0	0	0	0	0	0	0	11112.9323973	0	0	0	1725.67616306	0	0	0	0	0	0	0	0	0	0	0	0	0	0	0	0	0	0	0	0	0
RP11-459K23	0	0	0	0	0	0	0	0	0	0	0	0	1319.22009687	0	0	0	0	503.859056514	0	0	415.669924826	0	0	0	0	0	0	0	0	0	0	0	0	0	0	680.912606739	0	0	0	0	612.552080326	0	0	2798.30881409	0	0	0	0	0
RP5-1051D14	0	0	0	0	0	0	0	0	0	0	0	0	0	0	0	0	0	0	0	0	0	0	0	0	0	0	0	0	0	0	0	0	0	0	0	0	0	0	0	0	0	0	0	0	0	0	0	0	0
RP11-385M4	0	1502.95480915	0	0	1222.44980163	0	0	0	0	0	0	0	0	0	0	0	0	0	0	0	0	0	0	0	0	0	0	0	0	0	0	0	0	0	0	0	0	0	1151.13280101	0	0	0	0	0	0	0	0	0	0
RP11-372M18	0	0	0	0	0	0	0	0	0	0	0	0	0	0	0	0	0	0	0	0	0	0	0	0	0	0	0	0	0	0	0	0	0	0	3508.88273665	0	0	0	0	0	0	0	0	0	0	0	0	0	0
MIR205HG	362777.54729	46550.5861044	3230.39601649	111628.753588	1635.26116159	43057.644471	64683.9058841	181427.989083	53233.520725	13455.2084132	111041.635987	73658.6606832	194853.833193	78116.1113182	22566.0614787	2394.12457887	321196.317708	1358.61484084	240469.987701	526261.50659	19178.4762701	79344.5978475	102035.162812	113103.62265	1736873.00808	8542.88520313	314332.036902	382242.175395	314608.039643	50562.5734535	256267.600274	86841.6619059	330773.197663	84122.1240668	27153.446169	333442.593839	390501.21024	397979.259019	80072.7714614	130890.155562	11561.8769863	459669.131031	73253.314818	193497.884225	286309.369153	505178.042291	25930.323958	38978.2388823	347388.86647
RP1-272L16	2816.57115557	0	0	1713.44206437	0	1184.11860132	0	0	0	0	6584.32104436	4103.213171	325.177264289	0	0	0	0	0	731.394601284	2113098.87857	0	3114.71818549	8020.46609067	0	8767.30984321	61267.3103359	35788.6232535	12610.8345985	484.942299141	3555.50625254	34209.6433564	0	2138.00534333	0	0	23833.2151603	10319.7357662	0	389.812978453	0	905.935303083	0	347.364907182	49386.8784582	0	429.69852781	0	950.181508423	1619.30748898
RP1-28O10	20514.6170592	41061.8596916	11912.5085807	7679.95625497	2783.18759867	2653.71653	1144.03059138	5392.76156579	11832.1173144	4600.32990937	614.835708982	13439.8262726	19676.2921995	124888.244393	63558.1489901	23543.0615471	7633.42754255	8350.11706864	6556.4849373	3918.93832826	4133.17076195	0	599.152917605	23111.1717779	15554.929265	6538.36026246	307170.118491	8074.86204603	49992.7727839	8765.03103219	4035.09971841	12982.7029825	22588.3241979	7647.73756024	0	2256.86128146	4081.31614283	34352.1611803	34944.2410034	4897.14241028	0	80891.4234868	143239.59703	4328.28562481	7500.05582428	257119.167512	1094736.58095	10647.2120808	320260.490629
SERTAD4-AS1	26990.2700077	293168.999736	166644.604598	72245.1343084	174542.454146	33620.7910972	50276.3842312	25941.2510729	139002.737127	112090.821666	30087.1446394	44360.7266421	93481.9858482	57168.8677403	224449.910936	42993.4936513	67294.290019	13488.2667947	56069.7008681	6702.78973833	13091.1185488	71854.6457898	33304.9055564	48724.2314868	96071.8290559	26262.9662806	87967.2194413	132834.094532	44405.0650689	8328.5255027	19170.7426861	11822.1476113	63414.6135237	83114.8729296	122083.955933	65048.8563375	44920.9004346	82963.5486275	19507.3441	24720.4480858	1929.17298605	57400.8689457	49190.5382554	14688.3341138	118235.894539	90588.4958101	82019.0637843	15175.4586529	93534.7649756
RP11-75I2	0	0	0	0	0	0	0	0	0	0	0	0	0	0	0	0	0	0	0	0	0	0	0	0	0	0	0	0	0	0	0	0	0	0	0	0	0	0	0	0	0	0	0	0	0	0	0	0	0
RP11-543B16	9708.94302164	2476.79654437	8143.52824828	5003.04282285	12087.2274771	5122.19639782	5382.49901148	10246.4515562	16350.1612827	475.689869233	5785.42675477	8192.05767209	5802.36638963	29692.4799341	7588.43910787	4792.79036521	3683.50524815	12893.8985266	9491.48198813	10211.8374769	6648.19576277	18947.0812232	17347.2498754	7841.44698744	11851.611308	8604.76712704	9264.04568286	5844.77874955	5506.56027992	11535.1629255	9346.24614595	33673.2702168	1981.81462131	20066.6072972	15718.0908021	5989.75778645	492.359079446	17957.9962468	14543.7506847	16394.094537	7837.69217195	3377.9510625	6198.27609038	0	11350.9604702	17425.9380208	8230.74827977	3853.35368932	7223.61030461
LINC00467	97644.879956	44523.6846431	51525.3490523	74946.9112319	64369.3475356	57390.7962238	45332.0835828	24000.0925305	96433.8841907	90069.0106222	94681.9346341	58713.0464334	53376.9560349	116039.356796	54246.3357022	12860.3907539	53936.8242434	79576.5405732	106873.062926	153816.567271	89878.8088916	79722.5704453	31548.0682045	43604.7682395	31518.2784945	101414.473751	85828.7728791	65162.1216267	23659.1442243	45972.3441315	50974.5220857	27381.0109441	46171.5355493	13429.7486771	95866.3367105	75914.8669223	65140.9437019	42876.4862484	25013.8466162	25930.0552842	74026.8087362	22576.546727	67203.9420079	169485.411523	23032.2287418	32736.7871436	39243.7529267	116577.636824	35220.1199119
RP11-359E8	529.345036093	1530.43499554	0	0	0	0	383.757097108	0	0	0	412.484716152	474.557489971	488.909276406	0	0	0	0	0	0	0	0	0	803.926699571	0	0	1595.08903986	0	0	729.11859041	0	2707.09221615	725.826221597	0	0	0	0	1369.04908589	640.177405963	586.090118096	0	0	0	0	0	457.425729214	0	0	0	0
RP11-354K1	1930.07343929	0	1618.87937123	626.211817713	0	2163.79963215	932.824943739	0	0	4286.90083862	2506.63789046	1153.53974485	1188.42562572	743.298927884	1068.54302822	0	691.575486761	0	1336.51423722	3834.5304258	1497.83282313	948.613601222	6351.02092661	1177.78086945	0	1938.64667922	0	1646.02957092	1772.31903515	0	3948.18987832	0	1116.25285081	779.48094364	8853.18105862	613.403322652	3327.84239338	0	1424.64982552	0	0	0	1904.27223476	504.173929922	0	0	0	0	0
RP11-122M14	3223.34858642	3772.09783668	1287.44485069	2539.83545153	3068.08975498	2409.12438653	3894.69631384	1311.35158385	627.753221002	23012.3704276	2392.14219563	9082.00847241	567.070955179	886.68407996	5098.67595034	858.74085119	1814.96258455	649.75625477	8609.39738045	4421.75154117	3216.18671036	1244.76519655	1282.11882491	3371.9501238	3503.76551272	3700.19023603	4979.61346248	3141.68776179	422.841205368	4185.26007206	1098.95578791	210.465923147	3462.11375627	0	18775.098493	5853.84900084	7807.26483195	2970.08897644	169.947012221	833.582713495	2633.07460303	403.492795031	454.32269875	2646.29627981	132.638537305	749.3437622	0	5385.26607771	1058.9557743
RP11-552D8	276.942104976	1201.03673491	0	0	325.626805143	310.478975916	0	236.602949492	0	461.338666408	215.803262093	0	255.786972424	0	229.984426605	0	0	0	0	0	0	204.171801587	1051.4935309	0	0	0	0	708.555775562	0	279.678895067	0	379.736897392	720.759291083	0	423.441330986	528.095575793	0	0	306.629929335	0	1425.23155113	0	0	0	0	0	362.83785647	0	0
RP11-15I11	737.969256201	0	1237.966578	1436.60358181	2603.09898935	0	535.002541262	630.477271294	0	2458.66371627	575.05222193	661.588971312	1363.1941001	852.60759375	2451.36341769	688.115218012	1586.55552845	1561.96307519	0	2932.28797267	10738.1397247	1632.1734021	1681.15259822	0	765.707044313	555.935444776	798.040013726	1888.09274312	0	745.261996855	0	0	2560.81536361	894.110494175	0	0	5725.84647097	892.482618901	817.078576404	0	2531.88193202	0	728.104089761	1734.95146473	0	0	966.856170476	1991.65496569	848.548875355
RP11-384C4	972.517624451	0	1631.42882372	946.599259333	1143.4801762	0	0	2492.58456093	0	2430.07460329	1515.64151516	871.861435062	0	0	1615.23946127	0	0	686.133650602	0	0	1698.12442158	0	738.49080542	0	0	1465.25621104	1051.68063824	0	1339.5434568	982.12821291	2984.09700106	0	0	3534.85544209	1486.96839486	2781.71274226	838.40990531	1176.13988537	1076.77021697	754.501592281	834.147148145	1278.24849279	959.517017514	762.123382441	840.386804835	0	0	1312.33079135	0
RP11-61J19	7935.39230312	9832.58387194	10459.3260581	4413.66160677	2665.8242662	0	1643.68250629	7748.03393639	0	944.215734411	2650.09005889	0	2094.06322605	14407.0138582	58367.5536652	0	2437.17867322	0	25905.0274593	0	0	4178.75720418	0	9338.87993625	0	2561.99165816	0	1450.19171534	1561.45577645	0	5797.41736651	6217.61980188	3933.78263687	2746.96597608	38132.6774513	4323.38486448	34205.608938	1370.98233626	13806.6590772	7915.44893348	2917.0025271	1490.00652623	7829.31204953	0	979.607510455	2767.15497728	4455.69259286	3059.46997742	0
RP11-338C15	0	0	0	0	0	0	0	0	461.198770905	0	0	0	0	0	0	0	0	0	0	0	0	0	0	0	0	0	0	0	0	0	0	0	0	0	0	0	0	0	0	0	0	333.493595533	0	0	0	1032.24208141	0	0	0
FLVCR1-AS1	10947.895559	20222.368683	18569.49867	17760.2091158	30750.8946544	3954.84386549	3968.42544343	18082.9195393	27693.9129443	23404.5872991	13270.4358907	16794.1815795	20335.5603393	22205.2746944	8283.45330703	12136.5376364	11114.6060372	34071.3923545	44981.0043702	16071.1936964	6938.49028364	30222.1118961	4156.69598461	9018.93123772	1893.23170297	15578.4108152	4998.71217389	4512.74913877	8712.66080305	12038.8476415	23017.2834293	4670.24835797	9392.00140226	5747.85317684	16181.2342878	13569.61552	4719.10423432	10739.2139307	11178.7123915	1698.72595082	3860.42437436	16308.2032981	3720.53188724	39751.3604832	4835.34773745	7423.20178133	9402.94187771	7222.48504043	1958.18971236
RP11-348H3	0	5667.39209285	4932.52308421	0	11524.1361508	0	2842.20100045	1674.70525188	5344.62117325	3265.41274817	1527.4824645	3514.69141009	5431.47649257	0	0	7311.22419138	4214.28812245	0	4072.19181652	1947.22248185	0	7225.76766556	0	0	2033.90933646	4430.11057556	0	2507.62317445	2700.01728011	1979.60217915	2004.94017259	0	1700.5414524	0	0	3737.92649741	0	2370.65695646	4340.72993715	0	0	2576.46961827	0	12289.2395419	0	0	0	2645.16675131	0
RP11-554K11	0	0	0	0	0	0	0	0	0	0	1333.07560538	0	0	0	710.338263081	0	0	0	0	0	0	0	0	0	0	0	0	0	0	863.826405446	0	0	0	0	0	0	737.419621261	0	0	0	0	562.138825804	0	0	0	0	0	2308.50916478	0
RP11-323I1	0	0	0	0	0	0	0	0	0	0	0	0	0	0	0	0	0	0	0	0	0	0	0	0	0	0	0	0	0	0	0	0	0	0	0	0	0	0	0	0	0	0	0	0	0	0	0	0	0
RP11-478J18	0	1449.74780601	0	0	168.45330346	0	415.456864931	0	0	0	0	0	0	0	118.975575088	0	308.010399509	0	0	0	83.3871527915	0	0	0	0	0	0	0	197.336626487	0	146.535406599	0	248.575530156	0	0	0	0	173.264611968	317.251674127	0	0	753.227509262	0	0	0	349.712772157	0	0	823.6770583
LINC00538	0	0	0	0	0	0	0	0	0	0	0	0	0	0	491.944652291	0	212.262150973	0	0	0	0	0	0	0	0	0	0	0	0	0	0	0	171.303231301	0	0	0	0	0	0	0	0	389.309155331	0	0	0	0	258.707579718	0	0
PROX1-AS1	73.15147146	132.1840721365	477.308818242	0	129.016567985	0	26.5161609372	203.112940169	0	30.4644921112	0	16.3950619713	50.672666986	42.25751922375	106.309127808	34.10483587815	159.5651323495	0	37.9912939151	0	10.64422013525	136.4003456495	0	102.393725278	132.826732177	27.5536517819	19.7765017979	163.7631460865	632.685235604	18.4685917588	74.819924808	0	684.0536733315	0	0	34.87278364935	15.7660171698	88.4676648475	20.2483029138	99.317046331	47.0575723516	2639.699061005	36.0867916208	28.66294936875	258.3912280086	585.539219543	1622.118899775	74.033821611	841.127165075
RP11-176D17	5812.57638089	24157.5323186	8531.93182133	3536.04163477	5125.79337671	0	1053.4799075	0	1981.01788661	605.173018966	4529.36885227	651.371381021	2684.28181872	1678.87981781	6637.13743883	1354.97591192	7029.23733165	0	0	1443.50083597	2960.2439241	4285.24290899	1103.45923435	4655.41762588	753.881452895	1642.04870754	1571.43014286	3717.86601926	4003.11442302	0	2972.57539101	996.259543544	3781.89913738	3521.20735158	5554.60201554	1385.48626931	3758.27760643	3514.7964142	2413.37880675	7327.98747252	1246.38975418	10504.833656	716.859238954	569.385615839	1255.7131022	10641.2600671	0	0	5848.10711393
RP5-1111A8	0	0	0	0	0	0	0	0	0	0	0	0	0	0	0	0	0	0	0	0	0	0	0	0	0	0	0	0	0	0	0	0	0	0	0	0	0	0	0	0	0	0	0	0	0	0	0	0	0
RP11-22M7	0	0	0	0	0	0	0	0	0	0	0	0	0	0	0	0	0	0	0	0	0	0	0	0	0	0	0	0	0	0	0	0	0	0	0	0	0	0	0	0	0	0	0	0	0	0	0	0	0
RP5-1099E6	0	0	0	0	0	0	0	0	0	0	0	0	0	0	0	0	0	0	0	0	0	0	0	0	0	0	0	0	0	0	0	0	0	0	0	0	0	0	0	0	0	0	0	0	0	0	0	0	0
LINC00210	0	0	0	0	0	0	0	0	0	0	0	0	0	0	0	0	0	0	0	0	138.294223727	0	0	0	0	0	0	0	0	0	0	651.593994388	0	0	0	906.163999373	0	0	0	0	0	0	0	0	0	0	0	0	0
RP11-152L7	0	0	0	0	0	0	0	0	0	0	0	0	0	0	0	0	0	0	0	0	0	0	0	0	0	0	0	0	0	0	0	0	0	0	0	0	0	0	0	0	0	0	0	0	0	0	0	0	0
RP11-224O19	0	0	0	3391.98067928	0	0	0	0	0	0	1357.76219067	1562.08507115	3218.65273634	0	0	0	0	0	0	0	0	1284.58091832	0	0	0	1312.62535572	0	0	2400.0153601	0	0	0	0	0	0	1661.30066552	0	0	0	1351.81535284	0	1145.09760812	3438.26931276	2730.94212041	1505.69302533	0	0	0	0
TGFB2-OT1	0	0	0	0	0	0	0	0	0	0	0	0	0	0	0	0	0	0	0	0	0	0	0	0	0	0	0	0	0	0	0	0	0	0	0	0	0	0	0	0	0	0	0	0	0	0	0	0	0
C1orf143	375.238604848	542.442313972	629.474531185	0	0	0	1360.17595236	320.58166337	0	0	0	0	346.574771211	0	2181.29795642	0	0	264.73950427	0	0	218.402841858	0	0	0	0	0	0	0	3617.96931652	0	383.797121771	514.518886895	0	1363.897364	17212.0668637	0	0	0	415.463682917	582.237519866	0	0	370.222418522	1470.29785147	0	1831.89521926	0	0	0
RP11-412H9	965.036719647	0	0	0	1134.68417484	0	0	0	0	0	751.991367139	0	0	0	0	0	0	0	0	0	0	0	0	0	0	0	0	1234.52217819	0	0	0	0	837.189638104	0	0	0	0	0	2136.97473829	0	0	634.207906036	952.136117379	0	0	3533.44404791	1264.35037678	0	0
RP11-135J2	1336.99581052	1449.56387455	3924.99172598	1952.04571951	6288.12544496	1873.62756781	1211.59545312	1713.37517776	0	556.802173756	4948.71761146	3296.1937203	617.432496491	772.344356683	3330.89345388	1246.67410723	2874.39900359	943.281430845	0	664.061663438	3307.27074291	1724.94347114	3553.41312946	305.951069551	0	2518.00245858	1445.82737833	0	460.393710285	3713.07264863	683.745138786	0	2319.74393507	0	0	4461.61031308	1728.94120793	2829.62961765	0	1555.90825691	860.075345467	2635.96181194	329.780715611	2881.31371141	577.67263494	0	1751.67547759	5412.49040411	1153.00158019
RP11-392O17	1007.86160851	10406.8408744	11110.4422034	2802.86085204	9311.00824422	1936.98972427	2505.13814271	2091.13922805	785.131802038	2278.54355496	5273.14527914	1936.17277373	5585.23672993	1497.1189194	1076.10540237	537.01417167	4952.67525332	914.232404378	2691.94623525	1430.24757657	1173.22597757	5413.52080957	3170.65122771	3031.18622771	2987.83927008	2169.29668581	6228.00928845	4420.47727156	2578.13432714	2035.64294474	2798.01903198	1381.95757647	6370.19965642	1395.55119213	4182.73856442	10295.7424565	4840.90309902	4527.28367507	8289.56535816	1005.32863271	4816.290324	4731.08422636	3267.27657724	3949.10528507	1741.85757789	2284.43781216	3584.0995761	14183.1129252	6622.18709152
RP11-95P13	0	233172.703249	107539.843946	2012.82369979	0	0	0	0	0	0	0	0	0	0	0	0	0	0	0	0	0	0	0	0	0	0	0	0	0	0	0	0	1793.97779594	0	0	0	0	0	0	0	0	2718.03388301	2040.2916801	0	0	7571.66581696	40639.8335392	0	0
RP11-302I18	1210.17466451	583.140022416	1353.40397595	2355.84510201	474.305282089	904.482161351	292.445119018	1033.9016346	2199.7154668	335.99102232	943.011682264	1084.92082112	1117.73149686	4660.5559787	1339.97357237	376.140151325	867.249002691	853.806182581	0	0	1643.52235014	594.78987858	1225.27734919	0	1674.21475927	303.887542161	1744.91064094	2580.19104767	555.630565682	2036.88970202	412.592189857	3318.72954055	1399.80261033	488.742070771	0	769.219600754	3477.64880338	4390.67011871	446.634591603	625.920935076	345.996727044	530.205966461	1193.99706038	1264.4876699	0	3938.67289371	1585.51976509	0	3710.69604657
RP11-410C4	0	0	0	0	0	0	807.252355159	0	0	0	0	0	0	1286.47891365	0	0	0	0	0	0	0	0	0	0	0	0	0	0	0	0	0	0	0	0	0	0	959.954536553	0	0	0	0	0	0	0	0	0	0	0	0
RP11-295M18	7021.72240042	3045.16590064	2944.78990102	3417.29396793	825.609754084	787.203224384	2036.20370182	13797.5716274	957.245583269	7018.20053338	3282.94738639	7553.96362767	1945.60351973	12979.9962034	2332.45399818	6547.3649475	20379.5425623	495.398736535	2917.39115214	2092.53759244	3269.52314005	19153.6766777	2666.00691882	6427.25567752	15299.8553071	3702.77898853	1518.65823508	27845.8453999	12573.2147969	1418.2224567	2154.56257352	3851.21226534	11573.8343626	11910.3524784	15030.587245	669.479372671	6658.78911736	11039.4771704	8551.88584632	3813.32987591	0	31379.0926643	6927.85607795	4402.11565678	6674.48997795	12854.8803982	23918.8672024	3790.08967352	28258.5772856
RP11-103C3	0	0	0	0	0	0	0	0	0	0	0	0	0	0	0	0	0	0	0	0	0	0	354.146148324	0	0	0	0	0	642.383293409	0	0	0	0	0	0	0	0	0	0	0	0	0	0	0	0	0	0	0	0
RP11-191N8	889.750167051	5144.86658075	2238.87572617	4330.18810121	6276.97628637	997.496284326	12255.7319736	3040.59960624	3638.89101158	1482.17316229	9013.22986145	3988.30230933	0	1027.96660239	6649.97522884	829.642461433	0	1255.47859472	11090.2245216	0	5178.67731403	3279.78106805	8783.3268134	4072.11470821	0	3351.38388695	962.175903074	3414.63581202	1225.53975835	1797.08566618	910.04376628	2440.01155345	0	3234.01668106	19045.8505044	2544.97123228	2301.16761245	2152.0857477	0	4141.73214486	0	2923.65346754	877.855994747	1394.52363596	2306.59357072	4343.7137232	2331.42622668	1200.64306443	0
RP11-815M8	4525.42269334	2180.63984334	3163.14105601	3303.61244515	7538.0321435	2536.71900764	11482.7198736	2255.3144875	5141.11856345	1256.43135801	9109.79521915	5409.38477546	1393.24447104	435.701275363	7516.20446707	3868.06249804	810.764849209	1330.32927246	6267.42147313	749.231896825	2633.96453367	7228.66376482	8591.06037167	6558.63445088	0	2272.76213896	2854.71227355	3376.99954555	3116.65321311	0	1157.15985913	1551.28991049	2617.26620329	5026.01189611	12108.8097645	2157.36038328	5852.06753546	912.156584448	0	4681.23633207	323.461870072	991.347027471	1488.30896103	3841.92659024	5214.10330214	2301.34131377	7905.35706522	1526.66938753	433.627180792
RP11-400N13	0	398.294027023	0	0	323.958146551	308.887941633	0	235.390489283	0	0	214.697388861	0	763.42861389	0	228.805882691	0	0	0	1717.11748632	0	0	0	209.221040774	0	0	0	297.95051757	1057.38722437	379.504625023	0	0	0	0	0	0	0	0	0	0	213.757039687	236.321336993	0	0	215.916360911	0	336.272127547	0	0	633.616290528
RP11-358H9	0	0	0	0	2783.18759867	0	858.022943534	0	0	1971.56996116	0	0	0	0	1965.71594815	0	0	0	0	0	4133.17076195	2617.63658828	898.729376408	1083.33617709	0	891.594581245	1279.87549371	1514.03663363	0	0	0	0	1026.742009	2867.90158509	0	1128.43064073	1020.32903571	2862.68009836	0	0	1015.14134067	0	0	0	0	0	1550.61838661	0	4082.64081539
RP11-378J18	2537.28755503	3667.88521965	2837.58631361	0	0	948.181861281	3678.89387924	2890.27782796	1152.99692726	1408.89718573	2636.19445559	3032.90225051	3124.62467887	3908.5831264	3511.78467141	2365.8792889	2727.44939161	2983.52497509	1756.99062646	840.149924754	5414.91809936	3117.63458829	3853.42842738	774.159335539	877.551893483	2548.55799403	4573.0382809	2163.88157076	1164.95127591	5124.72294467	1730.10567702	0	2201.15028445	3074.13271031	3879.48383468	3225.53657305	1458.26801508	1022.84524863	2809.28139752	1968.48617672	2176.28053707	3334.93595533	3337.82549014	2651.16178881	0	1032.24208141	1108.08235268	1141.28542978	0
RP11-452F19	52810.7091668	63618.9944942	163599.194082	98008.8860819	56299.0164955	70257.7036783	64065.1780233	61962.5277102	158868.739384	119350.988678	85870.5202869	64704.5153888	91049.6340008	132198.043652	171624.10345	58106.7920767	65473.2433467	79486.2406833	318888.04616	207742.590842	88934.6995944	105121.73876	144635.738502	30292.8765253	98997.540313	72141.5948544	128686.751699	100436.289838	77105.8255633	156086.724486	51854.6172981	40068.4591348	66889.0243129	72515.7903133	240087.669681	85262.4880383	47956.4191488	59184.3712384	96283.8056778	35508.8635245	58885.7947004	43961.4647682	88230.6864243	72011.0350703	57805.090514	76486.3379502	48433.2534415	80290.3374617	50603.3590307
RP11-455P21	667.312625288	0	0	0	0	0	0	0	0	0	519.994030469	0	616.337758022	770.974951795	554.164602404	622.231846075	0	941.608946038	1386.2780652	0	388.400798552	491.967160208	0	0	0	1005.41516608	0	0	0	0	682.53282471	0	578.907728476	0	2040.62683975	0	575.291903112	0	0	0	1144.73385224	1754.19208052	658.39199606	0	0	0	0	0	0
RP11-239E10	0	0	0	0	1817.35863733	0	0	660.253405257	2107.1196412	1931.08597838	0	0	0	0	0	1441.22694532	0	545.243783948	0	0	0	0	0	0	0	582.191122866	0	988.631723808	0	0	0	4238.70590189	0	0	0	0	0	0	1711.33500602	1199.14626781	0	0	0	605.629874753	4674.75945441	0	0	0	0
RP11-504P24	0	4423.33041394	0	1489.16224944	7195.55818193	6860.82810195	0	0	0	2548.61482784	7153.08861425	0	0	0	1270.52372258	0	1644.60024291	0	0	0	890.479879607	2255.84941754	4647.08848289	1400.41018014	0	2305.09818566	1654.47319919	0	2107.33056009	3090.11071867	1564.83135421	2097.8148112	2654.50373057	0	0	4376.10907014	2637.92384841	7401.07537625	3387.88678021	3560.87946601	1312.2558794	2010.9031167	4528.45226558	1198.95019921	0	0	4008.9158288	4129.04078254	1759.18669281
RP11-365O16	0	0	0	0	0	0	1151.27129132	678.361621013	4329.81968466	0	618.727074228	0	733.363914609	0	659.385729442	0	0	0	0	0	462.147785619	0	602.945024679	726.795156782	0	598.158389949	858.65064768	0	0	0	0	0	688.826917427	0	0	0	0	0	0	0	681.044190574	0	0	622.239976803	0	0	0	0	0
RP11-100E13	0	0	884.261841427	0	0	0	0	450.340908067	0	878.094184382	0	0	0	0	437.743467445	0	0	0	0	0	0	388.612714786	0	0	0	0	0	0	726.05506692	0	0	0	0	0	0	502.578352593	0	0	0	408.952543715	452.121773574	0	0	0	0	0	0	0	0
RP11-3L21	899.317373148	0	0	0	0	504.111025412	0	3457.45600387	0	4119.80389733	0	0	1245.93009149	2078.04001344	373.415574379	0	2416.79605589	634.489182277	0	446.674691177	1308.59050408	331.504753115	341.45273799	411.590088787	0	0	0	2300.90155075	0	908.204583981	459.914591561	0	4290.97198025	0	0	0	387.651891702	0	0	348.855574926	0	0	887.295306518	0	0	4390.42032238	0	1213.5532049	0
RP11-449J1	0	0	2238.87572617	0	0	0	0	1520.29980312	0	0	0	0	0	0	738.886136538	829.642461433	2869.30255146	1255.47859472	0	883.845665521	0	655.956213611	0	814.422941643	0	1340.55355478	0	1138.21193734	0	0	0	0	0	0	0	0	0	1076.04287385	0	1380.57738162	0	0	1755.71198949	0	0	0	0	0	0
RP11-496N12	0	32907.4379585	6046.31861935	6277.89972495	74051.8684268	0	275.051709721	2593.0920029	0	10112.2459298	591.283534646	680.262853567	0	0	8506.87355383	353.768912486	2039.17167215	1338.37561886	1576.33231607	1130.64531204	441.649295128	559.414270882	0	694.558274828	1574.63948629	857.44075656	410.282668347	485.346420861	2090.3359588	766.297617734	388.052936629	520.224237455	1316.54822121	2298.36870982	0	0	1308.3251345	0	1680.28255631	0	0	1496.01461706	0	594.640622993	327.85251358	0	994.14646561	511.967758318	1744.99970335
RP11-145A3	3751.1394086	1807.54033526	0	4868.22476229	0	1401.79710389	0	0	0	4165.84217707	3897.36389614	2241.92940445	2309.73086727	2889.2350353	0	0	1344.09189287	882.171836488	7792.63284491	1242.08211467	0	921.825509493	0	0	1297.37738405	1883.90084276	0	1599.54700829	0	0	0	0	2169.46152067	1514.93804661	0	1192.16260383	1077.95559254	3024.35970525	0	7760.58780632	1072.47490476	821.731173933	1233.6647368	0	0	0	0	3374.56489204	1437.74061937
RP11-285F7	237931.467085	848936.250047	808253.437799	334753.403589	1495435.48836	244919.734226	209342.804723	241157.55627	492442.337066	379238.280546	556214.304315	258875.201792	1021866.74977	511050.051667	980756.691509	179503.159457	458049.522826	276979.141868	1350282.6382	832605.474999	526872.379801	314943.804457	230772.010394	261345.513618	308593.140704	184944.386327	368405.540819	630883.402786	338153.888323	156183.78572	165926.083248	114186.230327	432523.922513	119240.425387	717667.349608	413492.007024	377609.702611	290364.60377	605906.027089	206408.220082	595537.918233	653890.220361	742666.171556	531403.668465	271959.312644	748420.002218	328731.097962	758889.219687	452656.934543
RP4-559A3	463.217625431	0	0	0	544.648403925	0	167.908489873	197.872866683	0	0	0	0	213.91661263	267.587614038	192.33774508	0	0	163.405367866	0	920.287302192	0	0	0	0	480.628421661	348.956402259	250.461788923	296.285322766	0	0	0	317.576888342	401.85102629	0	0	220.825196155	0	0	0	359.374912262	0	456.629692346	0	0	0	0	0	0	0
RP11-396C23	0	3219.34698766	1867.93773603	2167.65629208	5237.00388389	4993.38376651	0	1902.62371811	6071.99565245	7419.63606685	0	0	0	2572.95782729	0	0	2393.91514648	0	0	2212.22909181	2592.40296312	3283.66246577	1691.10024673	0	0	0	0	0	0	4498.03098694	0	3053.62392636	1931.97608793	2698.20326644	0	0	0	0	0	0	3820.29522286	4390.67011871	4394.4743879	5235.65234919	0	0	2917.73163871	0	0
RP11-275I14	0	0	1793.64475789	0	0	0	1550.29145479	0	0	0	0	0	0	0	0	0	1149.35130612	1508.71433399	0	0	0	0	811.920288914	0	0	1610.9493002	0	0	0	2159.56601361	0	0	927.568064945	0	0	0	0	0	0	0	917.087915716	702.673532256	1054.92353914	0	0	0	0	1442.81822799	0
RP5-1087E8	0	2734.01829605	1586.33908236	0	8895.01162189	6360.91851663	1371.11204042	0	0	1575.27449158	1473.75192555	1695.52952447	0	0	4711.7914938	1763.51136274	2033.02341586	0	0	0	1100.79422303	0	0	0	5887.0943608	0	2045.22817588	0	0	0	0	0	1640.72341136	0	0	1803.22082287	4891.42663349	0	4188.04094438	1467.2970664	1622.18565996	1242.92001685	0	0	3268.64013539	0	0	2552.12068468	0
RP11-1B20	462.364030298	0	1163.44524836	450.041662607	0	0	335.198152388	0	0	385.110102978	0	0	0	0	0	862.257398492	0	0	0	0	0	681.743190067	0	0	0	696.626724412	0	0	0	0	472.909721298	0	0	0	0	1763.34616094	0	0	0	0	0	0	0	362.336300988	0	0	0	0	0
CTD-2090I13	0	0	0	0	0	0	0	0	0	0	0	0	0	0	0	0	0	0	0	0	0	0	0	0	0	0	0	0	0	0	0	0	0	0	0	0	0	0	0	0	0	0	0	0	0	0	0	0	0
RP5-881P19	854.725936402	205.930976879	0	277.315604362	2512.4536044	479.115361397	413.098101504	243.409090356	194.202737559	355.957180724	444.022154707	0	131.572481273	164.58360061	1183.00089234	398.492158803	306.26166522	0	887.805634488	283.017953456	414.568604056	210.045025252	865.392707639	651.969917326	295.61740545	2468.25237215	616.2004648	546.703614112	392.432488858	143.862081149	0	781.320883506	988.6569534	0	0	2580.61238883	368.430696467	516.842697547	315.450472344	1326.23217054	3421.20306484	468.094404531	0	669.814721434	0	1043.18181581	186.637640781	384.460269684	327.600247109
RP11-520H14	3012.25334456	3870.65996204	5474.24527265	3420.63680774	5509.44917265	2626.57758816	727.926979218	3717.26483653	912.554259906	8920.71850812	5346.52821723	2850.51006314	5409.74092635	1546.74921409	8199.36919056	1404.37921328	6655.9143668	1062.60716098	6257.66781588	1329.89494536	3116.87755103	4194.73644471	1651.99966299	4595.38778544	868.187177856	2269.2251592	3076.48151134	4709.73778963	691.511762269	1014.00698549	513.49290325	2983.01990495	4936.03139229	1419.28611125	767.616854794	5903.56377004	6636.44870357	6678.73831752	5188.03115654	389.49593092	5167.33573497	6048.80372809	8090.40515923	3803.16172571	1156.88641519	3880.66109308	1315.50906254	5871.35278904	4618.15839677
IBA57-AS1	1761.45547892	11034.1736847	1969.93121616	5143.53388496	17259.2366688	16456.3544567	7236.30582331	7022.78895014	6403.53987684	10759.0510517	1830.11939585	7895.71861238	3253.80183018	8818.70256874	3413.16981324	1094.97273381	17041.2399585	9527.73108269	8538.26178067	2333.02163192	3417.44228367	8224.52431949	3566.87602743	4299.54326758	10356.755186	6192.47905726	4444.62222933	12768.9267417	808.7415254	1778.86248859	1201.08740448	2415.26884659	6621.7651563	0	0	8957.02823717	12654.6268859	4260.5254506	1950.28115741	5466.31106795	12086.6750577	7331.48296993	9848.14736073	3681.02026839	1014.75723392	4299.66670417	7692.61539692	8715.43241618	10126.987358
RP5-1139B12	3448.36419455	8545.59645415	3718.7608593	6712.92511396	14480.5899276	2761.39350962	5714.16326793	2104.34167775	1343.15087076	820.627287499	6525.78895829	5299.6394037	6824.89192784	1138.29809637	4909.1440171	2756.06356952	5295.44057271	347.557228773	0	0	5447.7787399	5084.51923692	374.078457719	1803.6696561	3066.83711466	4453.30487177	532.723045812	8822.63232058	4071.23024436	7462.37470673	3023.15586233	2701.89761024	17949.1705133	1193.70772783	0	6575.61938812	4671.61121323	8936.50789868	6545.18440784	4968.45223922	2957.72856587	27194.569374	9720.7614078	6176.79055507	5534.0131088	10221.0881491	1936.24337805	2659.01579189	7930.15571994
RP11-245P10	0	0	0	0	0	0	0	0	0	0	0	0	0	0	0	0	0	0	0	0	0	0	0	0	0	0	0	0	0	0	0	0	0	0	0	0	0	0	0	0	0	0	0	0	0	0	0	0	0
RP5-915N17	806.783109673	1749.42006725	2368.4569579	785.281700669	2845.83169253	1808.9643227	1462.22559509	0	1099.8577334	3023.91920088	314.337227421	361.640273707	1117.73149686	3728.44478296	1004.98017928	752.28030265	867.249002691	853.806182581	0	1202.14378301	1643.52235014	1486.97469645	1225.27734919	1107.71994957	2929.87582872	2431.10033728	2181.13830118	1032.07641907	1111.26113136	407.377940403	1650.36875943	553.121590092	2449.65456809	0	616.781102691	4230.70780415	1043.29464101	487.852235412	0	625.920935076	3805.96399748	795.308949691	1193.99706038	316.121917475	0	0	1585.51976509	2177.37198822	1855.34802328
RP5-1065P14	15079.7056693	1816.59312492	0	18347.2744589	738.776006993	704.408895276	2277.55672824	2684.00173923	1713.13399877	23026.8838869	0	563.289441351	37140.780824	5081.48432335	6783.19676932	585.874392631	3377.05892951	443.295029687	16968.598955	0	1462.8250443	6021.87515634	3339.85240715	0	651.93755025	1420.00205427	2038.39936728	1607.55809514	9519.92737161	3172.6512387	642.651941797	861.539972547	2180.3269373	0	32663.6563265	0	4333.41747386	2279.63006163	2782.70500144	974.931940611	7006.0005047	6606.77351196	11158.5902237	1477.17069618	4343.63530512	9969.14931715	5762.39821135	847.866471205	8669.64794185
RP5-1061H20	559.233760271	0	1407.19826474	0	0	626.955316895	810.850805479	0	0	0	435.775086455	501.352712287	0	0	928.822691696	0	601.146596962	0	0	0	0	0	0	0	0	0	0	0	0	0	0	0	0	0	0	0	0	0	0	433.86644311	0	0	551.757928348	0	0	0	0	0	0
RP4-803J11	588.069251035	14451.8498368	5919.02770105	1717.19021888	1382.89633809	0	0	0	801.693175988	1469.43573668	3207.71317545	1581.61113454	2715.73824628	2717.68670508	12208.9388967	2193.36725741	4425.00252857	414.896441848	0	584.166744556	2053.66922234	2167.73029967	1786.22463561	2153.13065197	0	2215.05528778	1271.87627188	4513.72171401	2430.0155521	4751.04522995	2405.9282071	0	4081.29948576	0	8991.51201266	6167.57872073	1520.92796885	3555.98543468	3255.54745286	1368.71304475	504.398353644	2705.29309918	580.207946528	921.692965639	2540.85698024	0	0	7141.95022854	0
RP5-1068B5	0	0	0	0	0	0	0	0	0	0	0	0	0	0	0	0	0	0	0	0	0	0	0	0	0	0	0	0	0	0	0	0	0	0	0	0	0	0	0	0	0	0	0	0	0	0	0	0	0
RP4-613A2	0	0	534.148015887	619.85433733	2246.3290771	713.944041066	0	3264.40008487	2604.48544483	12730.1370081	992.475916021	0	0	0	4759.62694044	0	1369.10883166	0	7937.67338855	0	370.656599633	0	483.5802736	0	1982.28727208	479.741246761	0	0	1754.3259485	1929.35846902	0	873.202104155	1104.92033455	0	1947.40023286	3035.87938876	549.009531903	0	1410.18637552	0	1092.43636661	0	1256.62634781	499.055412867	0	0	0	0	0
RP11-286M16	0	0	0	0	0	0	0	0	0	0	0	0	0	0	0	0	0	0	0	0	0	0	0	0	0	0	0	0	0	0	0	0	0	0	0	0	0	0	0	0	0	0	0	0	0	0	0	0	0
RP11-552D4	2877.40306317	831.910765924	1448.08017151	3360.86159048	0	1290.33923018	417.203816581	2949.93952624	0	7189.899629	2690.61131362	6706.93406697	2126.08254143	0	0	1609.81083113	9897.77760869	812.029733281	0	33728.0371168	1674.75573688	11030.8966931	27093.8048704	8954.91647302	8956.66496789	867.055280844	56009.2303212	2944.73180119	0	2324.67044891	1765.8188676	1578.17261026	14977.2458193	4880.69489939	9678.93647846	1097.37291667	496.123292592	4871.80879125	2548.68546768	892.942251415	1974.40334148	11345.9212548	11355.7518587	7666.68154905	20886.3105899	21070.996616	1507.94081634	1553.12543196	3308.56212868
RP5-956O18	0	0	0	0	0	0	0	0	0	0	0	0	0	0	0	0	0	0	0	0	0	0	0	0	0	0	0	0	0	0	0	0	0	0	0	0	0	0	0	0	0	0	0	0	0	0	0	0	0
RP11-543E8	0	0	0	0	0	0	0	0	0	0	0	0	0	0	0	0	0	0	0	0	0	0	0	0	0	0	0	0	0	0	0	0	0	0	0	0	0	0	0	0	0	0	0	0	0	6838.9239637	0	0	0
RP11-99J16__A	4757.02115335	2427.07646504	234.707418133	2723.67221831	1645.08114568	11921.0076389	4260.13175979	1434.39438674	3051.79855841	26336.9498083	1526.34678981	1756.03912831	2326.04495146	323.293585734	3253.29643166	782.763036103	9926.29351072	592.268526653	5813.09166374	2223.74255177	17264.0545284	6188.91029793	4462.24146888	0	0	5480.82081616	7867.66586023	3579.65538658	3468.86978441	282.590050852	572.414145928	767.379098224	2184.78485483	7119.64564507	7273.43127864	3468.3511292	2653.61410179	1692.06741873	1858.92969799	2822.22863254	1680.0777876	1287.27701374	4141.26117968	6359.33882612	1934.45170838	0	366.614607392	4531.200145	2574.03673713
RP5-858B6	1210.17466451	5248.26020174	0	1177.922551	0	1356.72324203	0	2067.8032692	0	61486.3570845	2829.03504679	0	0	2796.33358722	8039.84143423	0	1300.87350404	853.806182581	2514.02195747	0	0	2676.55445361	0	1107.71994957	0	1823.32525296	0	1548.1146286	0	0	0	1659.36477028	0	1466.22621231	0	0	1043.29464101	0	0	2816.64420784	0	0	1193.99706038	3793.46300971	3137.26392416	0	0	0	1391.51101746
RP11-295G20	87363.7061675	146008.894819	63074.4577742	111586.529927	222780.401263	47525.1780128	31266.9947474	78417.5403346	235184.270394	339884.371767	121217.178456	62128.4530552	249220.186801	127765.878397	158876.440507	35746.9453118	87967.5890947	149541.518707	340006.080289	195172.340747	78526.1963176	69299.4289727	109727.726881	31379.6122442	195064.057028	31934.9792714	50227.2784349	49985.4523471	65498.5582701	104606.754916	46374.7963916	188026.668955	36136.0894723	106741.55547	448642.103793	47447.1375186	105506.619269	101643.368194	114278.962498	88083.8117469	77146.7648433	28101.4355231	102198.430072	152237.318046	37587.7608517	35542.0865544	47329.5508329	70137.0757018	45776.7600926
LINC00582	1260.85199552	61971.0813771	5287.79694119	4295.37251848	1482.50193698	2120.30617221	1828.14938723	4847.38806573	2578.30971172	0	1965.0025674	3956.23555709	12809.9144079	13838.8066724	12041.2449286	9993.23105555	2033.02341586	12898.6230498	0	626.242406224	3302.3826691	0	1914.88068139	21928.0307604	0	1424.75918008	4772.19907706	7258.24597228	868.347265965	7003.21574934	0	9508.68823972	2187.63121515	3055.25193989	0	5409.66246862	1086.98369633	3049.68935102	20940.2047219	5380.08924345	0	7043.21342884	4975.98774912	1976.15912231	2179.09342359	1538.8533542	0	3402.82757958	8698.69198856
RP5-865N13	0	0	0	0	0	0	0	393.084851296	0	2299.36154394	0	412.482121478	0	0	0	0	494.586381119	0	0	0	0	0	0	0	0	0	0	0	0	0	0	0	0	0	0	0	0	0	0	0	0	0	0	0	1590.36524925	0	1205.6152737	0	0
RP11-66A2	0	0	154.59425925	0	0	0	133.619635673	7715.78208112	0	0	0	0	170.232368034	0	0	0	0	0	0	0	214.552448955	0	0	0	0	0	0	0	10154.8152357	0	0	505.448034824	0	0	281.810366704	0	158.895510948	0	0	0	0	0	0	0	0	0	0	0	0
RP4-799P18	0	0	0	0	0	0	0	828.72012464	0	0	0	0	0	0	6444.30589187	0	0	0	0	0	0	2145.38256462	0	0	0	0	0	0	0	0	0	0	0	0	0	924.847793174	0	1173.10859701	0	0	0	0	0	0	0	4735.54356937	0	2617.89699099	0
RP5-827C21	10097.5793348	10615.9929934	6929.59340611	10721.968196	14031.3384548	7203.86950705	665.49096596	4705.51329308	2502.84698845	29054.2090374	7153.08861425	7406.56921542	8478.40232986	2121.12133079	30492.569342	1711.89639603	2960.28043723	1295.2864526	0	4559.35020141	534.287927764	2707.01930105	5576.50617947	6721.96886468	0	10372.9418355	6948.78743659	9394.41267306	2528.7966721	927.0332156	938.898812528	0	1592.70223834	0	0	12253.1053964	791.377154524	4440.64522575	10163.6603406	712.175893202	7086.18174875	13875.2315052	9962.59498429	719.370119523	4759.45892884	1120.36030788	2405.34949728	23535.5324605	5277.56007842
RP5-855F14	0	0	0	0	0	0	0	0	0	803.793907242	0	0	0	0	1602.81454234	0	0	680.855699443	0	0	0	0	0	0	0	0	0	0	0	0	0	0	0	0	0	0	0	0	1068.48736914	0	0	0	0	0	0	0	0	0	0
RP4-781K5	806.783109673	0	338.350993986	392.640850334	0	2713.44648405	877.335357054	344.633878199	3849.50206691	2687.92817856	314.337227421	361.640273707	10432.1606374	82957.8964208	0	0	433.624501345	1707.61236516	838.007319156	40071.4594336	21600.579459	297.39493929	306.319337296	1107.71994957	3766.98320836	7901.07609618	53656.0022091	1032.07641907	0	1222.13382121	825.184379714	6637.4590811	0	977.484141542	616.781102691	0	0	0	1339.90377481	1564.80233769	2075.98036226	265.10298323	795.998040253	6954.68218446	348.584880462	492.334111714	0	544.342997055	2319.1850291
LINC01132	6548.91778637	14344.0453708	2330.36682491	8209.43386126	6416.81401276	8565.63445209	18127.7423156	12037.7442624	4193.40696325	68431.618383	7268.12642218	9518.29954244	13197.0702229	24074.4195335	18293.1298544	5088.75082131	7573.05242358	13931.2446174	7420.77243233	28781.7245512	15362.3626159	6071.7022683	3541.36811489	7810.98807569	3397.53481566	8970.01034018	7833.12146349	16882.3267553	9977.17959347	3006.19787817	4871.48131573	26803.1377222	6283.88847794	11541.1678868	4399.74856196	4162.66847484	13002.5373767	8640.11646877	3735.33944499	3310.21908704	2127.7019927	4760.32140386	6265.57276293	12674.7970176	12690.2174094	9809.42942909	1820.02453393	4016.91549896	4906.05769484
RP11-443B7	7003.17763537	5551.73102974	10800.6267774	20669.5005138	1328.11172926	7851.24176253	6878.60410194	24897.4187746	3387.7070582	22391.4017017	3872.8006783	3848.0174862	18570.0420778	98136.8740561	95865.8193704	4423.59783008	11413.4861996	19604.2304335	14079.1265685	18850.4226815	21958.4000084	2997.86951407	12008.2328444	6203.49767674	7500.8036994	17358.8006226	22231.1146681	11270.7577013	5600.99623053	13916.6270841	3234.86145493	16417.3526461	8231.19224018	12864.2428244	35232.04707	14215.7876876	7595.51062476	3551.71654461	13006.5569305	4732.16514871	6006.76070606	8759.37810197	14042.0074454	17526.5505111	4099.53395132	20403.2003247	5919.52757434	3962.98692153	5454.95705585
LINC01348	2769.08145184	8673.09053572	4064.5683784	2133.76589635	8004.01068766	1940.25564808	5353.3056244	4534.33377822	2831.24015554	1825.90829328	2337.5819935	1241.23988486	18222.5869818	2799.33394514	4024.23393677	430.335697347	3472.71810949	2116.45517853	1917.50049975	1146.12727319	7118.37931963	340.244608654	2978.8663451	2851.47897502	2035.15636855	5823.51751931	7111.90165513	5018.32130068	5403.34543365	2679.92741358	1180.0996724	19459.1295393	3002.79545243	11462.81449	1587.71027569	2310.13483102	1094.14805852	2093.03863721	3704.65730994	3580.52870893	3166.79285182	4018.72391715	5236.45675836	1265.84441633	1495.53813675	4083.71675679	6348.88386622	2802.48200262	2786.00811007
RP4-597N16	0	2407.38779166	0	0	13706.583174	0	0	1422.75844407	0	1387.07798152	0	0	1538.11723683	0	2765.91890049	0	0	1174.92797692	6919.12237852	1654.27750671	0	1227.74105468	0	0	0	0	0	0	0	0	0	0	0	0	0	0	0	0	3687.69976961	1292.00051422	0	1094.42957236	0	0	1439.06944014	0	0	0	0
RP4-580N22	13866.0539191	11454.0977035	14953.3331395	3856.14645644	0	4441.48345547	2872.11890572	10154.0023693	0	9899.35654182	6174.24490914	3551.68816178	1829.54997644	6865.73483388	0	0	6387.97357508	1397.54590938	16460.2279742	5903.15868182	1152.93710728	0	10529.3241678	10878.9759257	16442.5512674	2984.49554564	4284.21481053	5068.03841573	5456.87702928	2000.44009682	8104.17922392	2716.11812398	10310.6513324	0	0	9443.18273031	1707.70859661	4791.22248042	0	4610.40183494	6796.10413331	7810.77105328	7817.53864796	9313.94996857	0	0	10380.9820409	2673.01061185	13666.1029399
RP5-940F7	508.600433328	0	426.596591067	0	0	0	0	0	0	847.242226553	1188.95932372	0	0	0	0	0	0	0	0	0	592.04878482	749.917509074	0	2327.70881294	0	0	550.000550001	0	0	0	0	0	0	0	2332.93284653	484.920194259	0	0	0	0	0	0	1505.4044018	0	0	0	0	0	0
RP11-385F5	14475.5507947	26432.5331618	9585.46996121	10381.9327673	9853.83625522	10249.5772049	12703.6028522	7810.77105328	2077.26167058	18402.6499816	33839.6115213	26637.6612133	17591.8266966	5281.3344876	5694.2095583	9235.23055753	21293.2452503	4300.14125964	4748.14268485	9838.59780304	20398.1180519	14603.6567557	19670.1660278	6973.7025165	15810.1454494	10904.8875706	9062.7620992	18517.8326729	11543.3937158	10002.2004841	4675.4880138	10446.6081691	25115.6891431	8307.62584669	3494.67673367	19612.7641322	9852.16498041	14742.2230167	10122.5119182	10048.3116915	16336.788782	19026.2371811	18040.473803	16717.3460974	11192.1149575	17667.2202396	14972.5702513	18505.4580821	7884.29015765
RP11-193H5	0	0	0	0	0	0	0	0	0	0	0	0	0	0	0	0	0	0	0	0	0	0	0	0	0	0	0	0	0	0	0	0	0	0	0	0	0	0	0	0	0	0	0	0	0	0	0	0	0
RP11-136B18	0	0	0	0	0	0	0	0	0	0	0	0	0	0	0	0	0	0	0	0	0	0	0	0	0	0	0	0	0	0	0	0	0	0	0	0	0	0	0	0	0	0	0	0	0	0	0	0	0
RP11-177F15	129.780800228	1125.66132603	653.13409115	0	1678.55003796	290.993743635	0	110.877037366	707.701562251	0	0	0	0	0	215.550921211	0	139.507468881	274.690058051	0	0	0	287.037391404	197.100649447	0	0	195.535915059	421.034903794	0	0	131.063316688	796.445199592	177.952566743	450.350288083	157.240121389	0	0	0	0	0	201.37387325	0	0	0	1322.15266795	0	316.79153533	0	0	746.137804191
RP11-544D21	0	0	104.842735765	0	0	0	0	0	0	104.1114659	0	0	0	0	103.802336684	0	0	88.187885348	0	0	0	0	0	0	0	0	0	0	0	0	0	0	0	0	0	0	0	0	0	0	0	0	0	0	0	152.556534782	0	0	0
RP11-35L17	0	0	0	0	0	0	0	0	0	0	0	0	0	0	0	0	0	0	0	0	0	0	0	0	0	0	0	0	0	0	0	0	0	0	0	0	0	0	0	0	0	0	0	0	0	0	0	0	0
RP11-567G24	0	0	0	0	0	0	0	0	0	0	0	0	0	0	0	0	0	0	0	0	0	0	0	0	0	0	0	0	0	0	0	0	0	917.4976902	0	0	0	0	0	0	1299.05410999	0	0	0	0	0	0	0	0
RP11-177F11	0	0	0	0	0	0	0	0	0	0	0	0	0	0	0	0	0	0	0	0	0	0	0	0	0	0	0	0	0	0	0	0	0	0	0	0	0	0	0	0	0	0	0	0	0	0	0	0	0
RP11-467I20	0	0	0	542.716908684	0	0	0	0	0	0	0	499.867222769	0	2576.76961667	0	0	599.36542186	0	0	0	0	0	0	0	0	420.040113831	0	0	0	0	0	0	483.709568682	0	0	0	0	0	0	0	0	0	0	0	0	0	0	0	0
RP11-80B9	0	58021.4127548	0	640.443904479	0	0	0	0	0	0	0	0	607.717649518	3800.96042668	546.414048524	0	0	0	0	0	9957.18410833	0	0	0	0	0	5692.31338462	0	0	0	0	0	0	797.196419631	0	0	0	0	0	3573.33009351	0	0	0	2578.16214165	0	0	0	0	0
RP11-527D7	563.41964171	23619.7898002	3308.03943372	0	0	631.648096213	0	0	0	0	0	0	1561.14294397	5858.48631034	0	525.357426925	0	3180.04458423	0	0	18692.0791495	0	0	0	0	0	64583.8969192	0	0	0	0	0	0	682.629269505	0	2148.74816618	0	681.386430598	0	437.113946426	3866.04726146	740.54216573	555.887852961	4856.82520816	0	4125.8777805	0	0	0
RP11-561I11	3961.72969118	0	664.592583978	0	0	0	0	0	0	659.957102788	617.424490914	0	0	2746.29393355	0	0	0	559.018363753	0	1574.17564849	0	0	0	0	0	0	0	1013.60768315	7639.62784099	0	0	0	687.376755496	0	0	755.454618425	683.083438642	958.244496083	28073.0997198	0	0	520.718070219	3127.01545918	1241.85999581	684.694091518	0	2076.19640818	0	0
RP11-261C10	0	0	0	462.542819902	0	0	0	0	0	0	0	0	0	0	0	0	0	0	0	0	0	0	0	0	0	0	0	0	0	0	0	0	0	0	0	0	0	0	0	0	0	0	0	0	0	0	0	0	0
RP11-269F20	1002.30178605	2897.84096359	3783.1335506	5365.74307188	1767.75031234	1685.51635794	1089.95191495	428.153672916	0	4174.1627673	3514.63342032	898.562917095	0	0	416.176878503	467.295287864	538.710598875	353.573532334	0	0	1458.44241267	3325.2001401	761.107700926	917.445817084	0	3020.26180384	0	2564.38694804	3451.42022491	2024.41341356	2050.3249701	0	3912.83039913	1821.5566659	0	955.635003333	1728.17381281	2424.32029635	1109.74720097	1166.41324719	5158.16159252	2964.1408125	1483.35453706	0	3464.49740049	0	3939.52048157	2028.78302098	1152.48981739
RP11-370K11	3870.07013535	4195.9098271	0	0	0	1084.68104954	0	0	0	0	0	0	0	0	0	0	0	0	0	0	563.131234919	0	0	0	0	0	0	0	1332.65634391	0	0	0	0	1172.22712604	0	0	0	2340.18578735	0	0	0	1907.51478165	0	0	0	0	0	0	0
RP11-278H7	525.648492545	0	88.1791836283	818.623270083	0	825.024161422	609.723566578	0	0	262.692422199	0	94.2487082036	0	242.921716655	1920.69116945	0	226.017687014	296.68572378	3057.55631364	0	4956.34136342	232.516322646	0	1828.35675474	0	79.197507496	0	10086.5289699	0	0	430.110070543	0	91.2022231454	0	482.226342578	0	271.897737448	127.14137867	0	244.686130905	270.515318155	690.896880877	0	0	0	0	0	1986.09168367	241.765322028
RP11-518L10	0	0	0	0	689.294124905	0	0	0	0	0	0	0	0	0	0	546.633584402	0	0	0	0	1364.84766594	0	0	0	0	0	0	0	0	0	0	0	0	0	0	0	0	0	0	0	0	0	0	0	0	0	0	0	0
RP11-173A6	11720.6881867	16943.3452188	12015.5579629	10140.7311657	22968.5204942	4380.00963602	5664.73278983	4450.42779737	3550.75178292	40134.0694862	1014.7980387	4670.0397975	2405.63664723	22569.0245404	17303.7417719	6071.60486481	11199.215495	4594.00904469	0	3880.96937559	8337.84966857	18241.9380235	8900.21963764	0	9458.73407681	3924.25019842	5633.2236263	4997.89255531	14350.2648521	9206.17760821	5328.00710223	14285.4655656	24854.9726468	9467.05229126	1991.19989208	1241.66416523	2245.42998862	9449.81596483	2883.80674025	7072.47340308	4468.02693885	17117.0299899	8994.22699116	68377.4989042	7877.53582802	6357.75399625	20474.6012571	14058.7409343	14974.391918
RP11-11N7	1406.96942304	2033.90519968	0	0	4135.76474943	1577.34926456	1020.00484502	4207.11001593	4795.17413675	1171.8864442	1096.36124555	1261.34719764	1949.24016182	1625.53223481	3505.22058791	655.960301283	2268.62612947	992.649430964	0	4891.71404787	2047.27149891	3630.4417729	3205.18813119	643.926923953	729.926341308	529.957152964	0	0	0	1420.8733398	3597.64965548	3858.41079294	1830.86332071	2556.98888988	11831.8214148	670.730735984	1212.95190039	0	778.897334516	1091.55931295	603.39242305	1849.27912788	2082.24160249	551.292988794	607.905969105	2575.7816424	8295.08378035	0	2426.69117625
RP11-156E8	5627.06862405	4380.08911604	5445.91392851	6109.07618603	14759.3766734	7521.661171	2353.5189423	2773.5199111	3835.58782301	3965.81467748	2361.05397618	3298.43380177	2798.50657697	12252.2505853	2156.74872287	2018.04923051	5816.15382052	1526.93342601	2248.01848411	2364.88434829	6550.32698099	11807.211845	1643.44992351	5546.88057551	2919.28562611	6684.65218532	5148.94131915	10243.9074361	894.312796632	8305.4499707	2434.98196924	2967.58161907	10326.4621836	1048.87027494	9265.54889401	2476.188226	2985.29852425	3926.10237757	2635.8889095	2350.71283898	6497.13808029	14080.947241	2775.92301042	1356.83380796	2618.2954046	6867.76358939	16729.5584644	8761.44938905	6470.2461686
RP11-62I21	1393.94192838	20822.418356	9743.25547498	0	19121.5296131	0	336.853451906	793.93434163	633.436583496	0	1086.20975253	0	0	0	84503.9444821	0	998.942369766	327.819410843	965.260282435	923.1276951	1352.21018755	2055.32946931	1058.50348777	0	0	1400.13371277	1507.40891482	1783.19870183	0	0	0	0	403.091307235	562.958459295	0	886.027021609	0	0	514.45688144	0	398.53697078	0	0	0	0	0	0	0	1068.54302822
RP11-522M21	0	0	0	0	0	0	0	0	0	0	1082.20159847	1245.05673568	0	0	0	0	1492.88435334	0	0	0	808.332289237	2047.74522773	0	0	0	0	0	0	0	1402.52257711	0	0	0	0	0	0	1197.28646994	0	0	0	1191.19906396	0	0	0	0	0	0	1874.06648063	0
RP11-83A16	0	1563.41850837	453.565341077	0	6993.95849149	0	784.055448401	0	0	900.803516737	0	0	0	0	4041.5797727	0	581.281120338	0	0	0	629.477156274	1993.31521808	1231.87905904	494.972563671	0	407.366489707	0	691.75811709	0	546.097152868	1106.17388832	0	0	0	0	0	0	0	1197.44274128	0	0	0	0	847.533761507	0	0	0	729.701172776	0
RP11-36N20	2591.14850714	0	0	16393.6002537	0	0	12210.2129038	0	0	8093.27772352	2019.11623535	3484.44449607	0	1496.83260865	537.949803366	0	2785.34705511	0	0	1286.97664893	3016.28985037	21968.3235877	2459.51757055	10080.0608836	1344.27054251	1463.99523323	7005.17051636	2486.04294059	1784.52088737	5233.5093755	0	0	0	0	0	22852.1771408	12286.0962716	783.418477865	0	0	1111.23905794	425.716150351	639.127514248	6091.74008271	0	0	2546.11005306	0	0
RP11-690C23	0	0	327.47041223	0	0	0	0	0	0	0	0	0	0	0	324.220783979	0	0	0	0	0	0	0	0	0	0	0	0	0	537.762777781	788.555224888	0	0	0	0	0	0	336.58156987	0	432.271860961	0	334.870276278	0	0	0	0	0	0	0	0
RP11-1086F11	768.090450331	2775.86551487	0	186.905057838	0	0	278.41968984	0	0	479.815750752	299.261870596	516.444452095	709.417337805	0	318.927383424	0	619.24233636	270.95277835	0	0	223.52862284	0	291.628511936	351.531535015	597.720294796	578.62668742	415.306537756	736.934157389	0	4848.00533668	196.402302621	0	166.58365248	1395.90720009	0	1281.57479911	331.086360566	0	0	297.951138993	658.806012922	378.583290848	0	300.960968372	0	0	0	518.236751277	441.591761664
RP11-439E19	2789.76248469	4399.48496696	957.255153809	1234.27868383	2534.68870593	2274.61416857	2665.99986026	1083.36727884	864.359219394	2851.73512239	2272.69628141	2955.75126671	1756.81180353	5567.22882981	3264.49255675	1182.40822502	2317.29050399	1789.31080042	2107.44158699	2015.45399739	1771.35889798	3178.55871434	1348.09406461	2785.72159823	2368.32569636	1050.80789932	1919.81324057	2433.27316119	1571.97771564	2177.02881157	907.897436642	1043.25291824	3850.28253373	2150.92618882	5041.06333863	2901.67879044	2077.09839412	1686.93648653	1825.21258813	787.040744509	5873.31775671	3166.765892	1251.12225666	1987.47809302	876.629901539	1083.36727884	830.6884214	2224.50680973	1895.51180714
C1orf229	5000.41170056	19758.0649048	2656.31004003	5353.86144417	16266.4865986	6727.13614602	2537.58955576	5411.27082271	0	5275.56497136	7013.70159077	2241.43296304	5234.23066777	2696.02224064	2629.95034515	6061.38692926	3762.62393926	4703.87462857	10734.1389247	2980.33697842	9022.32005565	8847.56529749	3037.68937145	5492.48563124	3804.79762498	1757.91810261	6308.68655669	7889.35120961	5280.45894994	18852.6861206	852.410347955	13255.8112162	6796.14086202	4240.88724208	5351.90086139	9853.02857068	5029.34551259	12296.3393596	922.741527826	5043.26507188	12009.0591195	7229.63308298	6742.54053007	4310.48614577	1440.34408092	6509.79948597	4804.30745471	4948.26588022	4599.75121096
RP11-488L18	5634.1964171	14986.3493904	0	3071.06274675	8479.55598925	6821.7994391	1633.84009607	5583.68792961	3072.35708163	6945.35693503	4741.59826106	2020.4214094	7909.79091613	3645.28037088	1684.39492323	420.28594154	12112.9239448	2067.02897975	7022.70205484	5372.93484813	6033.93432194	3156.83837652	3080.43529973	3094.31949983	1870.70942563	5602.63085963	2924.55382276	10667.1587014	3104.21148372	227.594981075	922.032366794	10815.6799548	6842.89734139	1638.31024681	7580.86761307	1933.87334956	12434.5727753	12537.510323	1247.63495199	3147.22041427	2899.5354461	3850.8192618	9116.56078856	2295.95373477	2336.97983332	7426.5800049	4133.74434563	2128.80485854	2332.23912448
RP11-978I15	0	0	0	0	0	0	0	0	0	0	328.049925262	0	0	0	0	0	0	0	0	0	245.031376268	0	0	0	0	0	455.257725951	0	0	0	0	0	0	0	0	0	0	0	0	0	361.090543996	0	0	0	0	0	0	0	0
RP11-634B7	451.81791196	0	0	0	0	0	0	0	0	0	352.072788937	0	0	0	0	0	485.680263812	0	0	0	525.9497008	0	0	0	0	0	488.595926771	0	0	0	0	0	0	0	0	0	0	546.417929939	0	0	0	0	445.778014139	354.071727496	0	0	0	0	0
RP11-407H12	0	0	0	757.670968691	0	0	0	0	0	0	0	0	718.954489192	1798.6757924	0	10524.533686	0	274.595369993	0	0	226.533661203	0	0	0	0	0	0	0	0	0	0	0	0	0	0	371.08680843	0	470.699209555	0	0	0	0	768.010518672	0	0	0	0	0	0
RP11-438F14	0	0	0	0	0	0	0	0	0	0	0	0	0	0	0	0	0	0	0	0	0	0	0	0	0	0	0	0	0	0	0	0	0	0	0	0	0	0	0	0	0	0	0	0	0	0	0	0	0
AL672294	814.641386715	1177.6399154	1366.5864822	792.930548403	0	2739.8761576	590.587220874	0	0	4071.16394577	634.797907325	730.325487812	1504.82465595	2823.57060268	2029.53789452	0	0	6322.23149483	3384.67891243	1618.47063427	2370.75812103	1201.16657298	618.60593441	2237.01885919	4226.30511472	3068.47485753	6166.67283334	1042.12911146	0	10694.9935912	0	0	1413.43705134	0	0	776.711999463	2106.9132036	2955.6242574	901.969857069	1264.03513512	0	0	3215.00507167	2553.60821649	0	0	0	1099.29007847	0
AC079779	0	2360.38889767	4451.04035365	0	51836.1143649	0	591.868321136	697.491124425	0	339.999592	954.26236394	0	377.022229419	943.231828226	0	0	438.797895613	0	848.00523728	405.495354138	1663.13053436	300.943035095	309.973906397	373.645232446	0	307.51309852	441.432111714	0	3935.81694628	1236.71459348	3340.11725064	0	354.125768829	0	624.139662484	778.39684111	3167.22527136	2468.36299154	1807.85281547	1583.47134606	2100.74802385	1877.86071961	805.494763076	0	0	0	1604.4359445	550.837327822	0
RP11-356M6	0	0	0	0	0	0	0	0	0	0	0	0	0	0	0	0	0	0	0	0	0	0	0	628.651285246	0	0	0	0	0	0	0	0	0	0	0	0	0	0	0	0	589.078369219	0	0	0	0	0	0	0	0
AC105393	0	4955.09691179	0	0	4836.35877802	0	0	0	0	0	0	0	0	0	0	639.232716186	0	0	0	0	0	0	0	0	0	0	0	0	0	0	0	940.004450921	0	0	0	0	0	0	0	531.861778166	0	1802.12082589	676.380848412	0	0	0	0	0	0
AC093326	737.969256201	0	0	718.301790906	867.699663116	0	535.002541262	0	0	18439.977872	0	0	0	0	0	9633.61305217	1586.55552845	0	0	0	0	0	0	29046.1546775	0	1111.87088955	0	4720.23185779	1016.47709369	0	0	0	1280.40768181	0	0	0	22903.3858839	0	0	0	0	5819.79019656	9465.35316689	0	0	3602.72726454	0	0	0
AC092159	0	0	0	0	6975.02881559	0	0	0	0	0	0	0	608.781953633	0	0	0	0	0	0	1309.51564454	383.639317659	0	3003.10972012	0	0	0	0	0	907.886721158	0	0	0	0	0	0	0	8523.58931756	0	0	0	3957.45118095	2599.0306482	0	0	0	0	0	0	0
AC116609	0	0	0	0	3134.04269256	597.650040043	0	455.44392119	0	0	415.405996012	0	1477.11542008	0	0	0	0	752.220177855	0	529.556255688	0	0	2024.0505786	0	0	0	0	0	0	0	545.252851468	0	0	0	0	0	459.581633647	0	0	0	0	1051.02443352	0	0	0	1301.26834626	1396.87435395	0	0
RP13-539J13	6522.77852101	0	0	10158.3060898	0	17550.4025624	0	5015.40844929	9781.4903968	63565.1923526	7624.175906	0	1807.35439614	0	0	0	0	2300.98546606	0	0	3416.85000598	0	1981.25436186	0	676.794787868	0	5642.98657886	0	0	16468.0943846	1334.31027084	10732.6678036	6224.51221398	3161.15322031	0	48508.8277515	9559.61658065	0	722.201168052	0	30211.4507832	0	0	0	0	0	0	9682.1354918	6750.15483168
AC113607	1983.4746807	716.824296329	0	0	583.039299327	1667.75070462	0	1270.92256269	0	0	0	0	3205.93078876	0	0	0	0	0	0	2955.46811475	865.842096377	0	4518.51291222	0	0	0	0	0	0	0	1521.53562504	0	430.176493887	0	0	472.781217064	2992.4274486	0	0	384.706345471	425.316134825	2932.89822159	0	388.592554683	0	0	0	0	0
AC116614	707.451730568	3068.06188485	4747.08988555	7574.57339658	2495.45203866	34897.3700073	1025.75675204	1813.2147088	0	1767.74223961	551.271866888	0	39204.6423524	3269.39753994	0	1978.97797661	9125.67653583	499.123539065	1469.66321198	0	411.7632526	0	1074.42083345	0	22755.3164861	0	1530.07671805	33485.2538182	11693.3079199	714.442891722	2170.76229212	11640.5062456	23321.7113472	0	0	14164.7740955	43302.6108425	2566.72632879	2349.86883815	1097.7147226	7888.33515473	19062.0007848	7677.93974353	554.401783843	2445.33604114	18132.147088	22244.9615162	3818.58658836	18709.5456916
AC114808	0	0	0	0	0	1953.43022347	0	0	0	0	0	0	0	0	0	0	0	0	0	0	507.078820332	0	0	0	0	656.312677861	0	0	0	0	0	0	0	0	0	0	0	0	0	0	0	1717.64641218	859.56732819	0	0	0	0	0	0
AC108462	0	0	0	0	0	0	0	0	0	0	0	0	0	0	0	0	0	0	0	0	0	0	0	0	0	0	0	0	0	0	0	0	0	0	0	0	0	0	0	0	0	872.968529485	0	0	0	0	0	0	0
AC144450	39218.9511476	2652.38094291	1346.59984261	66748.2267491	6202.38698863	87422.2520486	25605.7889035	4114.81509784	16258.5916495	18338.8445382	98116.3142097	15009.7241937	66938.5622095	19078.4587706	1714.16180488	26945.9377876	18737.0177583	4854.36421906	1905.8155485	3645.25744317	55799.0646315	27053.6968539	5573.10794292	77045.6013916	1665.79777465	31099.8621758	10912.8689263	25232.0986329	13583.9991862	1621.31951784	18062.7882459	0	4377.26209319	555.754237696	18585.7457324	18805.8020491	56153.538009	26905.0061895	253.936669084	52313.0299614	37376.5020128	17936.3735034	38015.8186537	21747.6853318	198.189941177	1119.67757764	0	11451.10579	7911.5160225
AC141930	8815.74084434	10783.3622524	2843.97727378	11221.0387877	0	3801.26962405	11798.974964	2896.7874627	7395.80011001	5083.45335932	36461.4192607	7295.35946744	11900.316063	7051.29523479	0	6955.5430145	2186.87383651	1913.7565606	7043.7912502	2694.53489381	28813.0408612	22997.4702783	12873.6910675	26691.061055	703.622689369	5619.45557693	4400.0044	11277.5269251	8406.54028834	10272.5302269	18033.6240388	0	3529.77252822	3286.4601948	12442.3085148	1293.12051802	28061.806128	4100.59581657	750.828962101	12626.6861065	6979.78262339	2228.29804823	24086.4704288	3188.5594487	1171.99889539	0	0	1830.16942793	779.747615191
AC093390	110.597802134	159.879412552	0	322.950849276	260.080416214	0	160.359268906	0	0	0	172.363581066	0	0	383.335180264	0	0	356.660293643	0	0	0	64.3720394897	81.5367259352	83.9835267992	0	114.75480241	0	0	141.48211857	457.011446766	223.381497735	0	0	191.891835945	0	169.102782489	0	95.3466451234	0	122.453739044	85.8043244822	0	654.149206637	327.357995103	0	0	404.94950887	3477.61373101	0	763.02073423
AC018685	0	0	0	0	3236.02799407	0	0	587.830728263	0	17765.7556464	0	0	0	0	1142.77453658	10906.6891045	739.619122039	0	0	10252.2865589	0	507.25681601	0	0	0	0	5208.41471481	0	2843.16262037	0	703.744996593	0	2387.59750538	833.631356543	0	0	0	0	0	0	0	2260.8874164	2036.56171359	3774.39166916	0	2519.2745497	0	0	2373.45480675
AC011995	0	0	0	0	0	0	0	0	0	0	0	0	0	0	0	0	0	0	0	0	0	0	0	0	0	0	704.152953288	0	0	0	0	0	0	0	0	0	0	0	0	0	0	427.925749747	0	0	0	0	0	0	0
AC019118	1730.41066971	3752.2044201	0	842.146927269	1017.30305331	0	0	739.180249104	3538.50781126	2161.92844017	674.199156745	0	799.113782815	0	718.503070702	4033.77886421	930.049792541	0	0	1718.92743226	503.581725019	0	2628.00865929	1583.91220375	0	651.786383531	1871.26623908	0	0	873.755444589	0	0	1501.16762694	2096.53495186	0	0	1491.79141772	0	957.954193025	2013.7387325	1484.2066498	568.600191618	0	0	747.654467749	1055.97178443	0	1167.52187644	0
RP11-1293J14	5569.87366731	1150.25294062	26028.7053239	22460.2187896	11226.8962754	15164.8959421	6922.2316121	6118.1621041	2169.48681874	15905.9428579	8680.49231412	6420.07056728	5144.40056802	11031.6246802	4625.45845727	28935.7540936	11974.6368638	3368.29246659	9917.89634807	19760.3972788	6483.74779147	1173.23246663	4229.53824922	26948.273699	16512.075797	3596.53797255	9465.1257442	7125.2548551	8767.92080814	28124.5806424	4069.22318326	8728.32885506	7593.11532234	29885.5960104	4866.44201954	3793.24464854	18521.2369991	8660.66642866	9690.9319527	8025.15329972	4094.9041818	8366.71740732	7850.59377966	8729.77692614	7563.48124351	12624.778945	10424.8762567	8589.80154337	23788.072066
AC142528	1545.64402736	7820.30284681	6482.16586015	1880.56423697	16356.2277359	3465.63390776	4202.02201299	4621.7738368	1053.5598206	4184.01961983	1204.42149152	2078.50333903	4282.72479086	6250.12137512	6096.94854143	2522.14715432	2907.59919742	817.865675922	1605.46371411	1919.23365768	674.716787628	854.628783442	1467.12495738	5305.45540526	2806.5443	3493.1467372	5014.37873101	2965.89517142	1596.72479809	3121.8367014	1580.89738454	6887.89709058	2681.7573623	3745.349914	1181.63607559	2210.51916069	1332.50362774	3738.53088821	12407.1787937	1199.14626781	2651.45746474	1777.60532185	3049.96374356	3936.59418589	4674.75945441	6130.92447739	5568.85330223	2085.71669919	5776.05651294
AC108488	15722.7914637	30186.6315129	11333.2123084	18173.2228561	22241.8836622	27541.836049	18700.6436583	19939.049474	7033.13073451	17188.1778076	29289.3765517	20922.967141	15656.2664433	22422.6892638	18157.2104323	13057.1210102	25879.9103499	13519.3409772	16841.6497059	24891.9093241	18445.4885767	13402.5727144	18095.4349508	22487.0041981	20647.1005226	17211.5000951	22581.6152709	29855.7746096	19964.6186352	20095.8048891	7789.42813788	14484.7813792	33886.5074796	30360.0704354	9014.98854533	12648.4405761	23508.8605107	29710.5832663	21488.3132137	8767.38730143	39192.9373484	21311.3727172	34903.370987	9433.51547077	15072.6555068	23387.155774	26392.9014682	19559.0397904	29942.9191917
AC010907	0	0	0	0	0	0	0	0	0	0	0	0	0	0	0	0	0	0	0	0	0	0	0	0	0	0	0	0	748.056735615	0	555.481259937	0	942.291367563	0	0	0	0	0	0	0	0	356.913540193	0	0	0	0	0	0	1248.94639663
AC012445	0	0	0	0	0	0	0	0	0	0	0	0	0	0	0	0	0	0	0	0	0	0	0	0	0	0	0	0	2562.12512907	0	0	0	0	0	0	0	0	0	0	0	0	0	0	0	0	0	0	0	0
AC107057	0	3411.09492736	989.597107803	0	0	0	0	0	0	3930.77898212	0	0	0	0	0	0	0	0	0	0	0	0	0	0	0	0	0	0	0	0	0	0	0	0	0	0	0	0	0	0	0	0	0	924.582285281	0	0	0	0	0
AC108025	337.54647593	0	3114.34641371	0	396.885047703	0	244.70968255	288.37973844	0	1968.0335128	0	0	935.285638182	0	0	0	0	0	0	0	1571.71695342	0	0	0	0	0	0	0	0	0	0	462.836272247	0	0	0	0	0	0	747.462016083	0	0	221.83056803	333.034157648	0	0	0	0	0	0
AC010729	0	0	0	0	0	0	0	0	0	2693.12391602	0	0	199.091921835	0	0	0	0	0	0	0	125.462800907	0	0	0	0	0	0	0	0	0	0	0	187.001121913	0	329.585778242	0	371.666246684	0	477.331127109	167.234889011	0	0	0	0	0	0	0	0	0
AC017053	0	0	0	0	0	0	0	0	0	0	0	0	0	0	0	0	0	0	0	0	0	0	0	0	0	0	0	0	0	0	0	0	0	0	0	0	0	0	0	0	557.538767413	0	0	0	0	0	0	0	0
AC021021	0	0	0	0	0	0	0	0	0	0	0	0	0	0	0	0	0	0	0	0	0	0	0	0	0	0	0	0	0	412.238197827	0	0	0	494.573049923	0	0	0	0	0	0	0	0	0	0	0	0	0	0	0
AC017076	0	6182.60955584	0	0	0	0	0	0	0	0	6665.37802691	0	0	0	0	0	0	0	0	0	12446.4801354	0	3247.68115565	0	0	3221.89860041	0	0	0	4319.13202723	0	11728.691899	0	0	0	8155.47599436	0	0	9470.68349923	13272.3689188	0	0	8439.38831314	0	0	0	0	23085.0916478	0
RP11-439M11	7162.64278077	15060.7513056	6553.94070704	6337.95697858	5359.32144866	1460.00321201	7552.97705311	10013.4625441	0	2169.40916141	7103.5862709	2918.77487343	10223.9557507	1504.60163603	23792.6449364	5464.44437833	6299.55871591	5053.40994915	2705.4007916	0	7200.87016831	5280.5610068	8900.21963764	12516.4688419	0	5395.84402283	704.152953288	9995.78511061	5381.34931953	657.584114872	1998.00266334	11606.940772	7908.40038762	22878.7097039	4977.99973019	5587.48874354	1122.71499431	7087.36197363	2162.85505519	2525.88335824	0	2139.62874874	7709.337421	2041.11937027	6189.4924363	1589.43849906	5971.7587	5272.02785037	11230.7939385
AC019048	1013.09372991	1464.52124068	0	986.09397944	1786.78396308	0	367.229200597	432.763672086	0	2953.37465245	1184.15868042	0	935.705236943	0	841.315843218	1416.98019321	544.510982174	0	0	503.185351972	1179.31655657	373.444789175	1153.95400416	927.324103136	0	763.195361604	547.779820997	1295.99905651	2093.14933155	2046.21059702	2590.5014343	0	2636.64031381	3682.33931652	0	0	0	1837.81750595	1682.54404024	785.98147029	434.475028711	5992.11238273	999.550701959	793.921262462	0	0	0	683.542417566	1164.89885984
RP11-557L19	1780.90372553	2574.46202325	1493.76093402	1155.62748695	5583.93474055	1331.04393776	6025.10748361	3042.99755546	1618.56035531	7911.15769904	1850.32576141	2660.96510543	9320.89341312	8916.06994725	2464.89618104	4428.24935251	638.125646302	1256.46871979	8632.53280979	0	2764.13943701	4814.1392144	4958.60466668	1630.13046206	615.94730694	894.407182447	1283.91295584	0	5723.69593765	1199.00195078	3643.04586564	4069.89308798	3604.93329972	9350.08292804	15430.2288167	0	0	1435.85531747	1314.54282008	921.110776697	1018.34367928	5851.91837588	4685.59098773	0	512.980589071	0	777.754963632	0	0
AC013460	1161.9769085	1007.84743609	2046.71535201	339.302791011	3278.9885386	1172.41999211	168.47872556	595.63459406	475.224111731	967.828415636	633.817978478	625.02693801	429.286193917	0	96.4954726013	325.043619499	374.719042688	327.920620911	241.389573564	923.41269902	0	1113.64718081	88.23585727	319.080800539	241.130344304	262.606122417	753.937154061	1337.81193129	1120.352956	2698.95746314	0	1593.2770718	302.411817407	422.349199163	0	332.362714188	601.045940145	562.106990601	257.307856725	0	697.65502449	916.360913939	458.577444616	182.119017601	100.410525925	1276.35984441	152.237309955	313.598034117	400.827347728
AC092580	0	1160.06320024	2019.28450356	0	7548.43203734	0	0	1371.18724247	1093.99495231	1336.8001016	0	0	1482.36458646	0	666.41542805	0	0	566.169984611	0	0	0	0	0	0	0	0	1735.60941152	0	1105.33756457	0	0	0	1392.34097595	7778.18937363	0	0	0	0	888.507620397	0	0	0	0	0	0	0	1051.37877813	0	0
AC007463	472.81949832	0	0	0	0	530.076543053	0	0	0	0	0	0	0	0	0	0	0	0	0	0	0	348.57974668	0	0	0	0	0	0	0	0	0	0	0	0	0	0	0	0	0	0	0	0	0	0	0	577.070007825	0	0	0
LINC00299	340.755383126	2462.96804397	785.988286845	248.755486665	1201.9741825	668.534743751	617.590077057	1310.04557503	0	1561.01216028	531.057733244	1298.31968793	1022.85840693	2460.55835679	778.188590609	794.338526904	1098.88182822	1622.77286445	353.943335796	169.247042334	198.332322665	565.23886492	776.267836209	1949.41661563	265.172425939	449.228052931	460.616123812	1416.71060286	469.355652133	1462.52184534	697.054799704	1284.89970102	1995.38408539	412.853193327	1172.27499305	406.112430683	587.532156369	103.025381539	2735.30831712	264.365881587	1242.15800988	1063.71221904	1596.95079895	467.313771623	956.990949553	831.774968273	334.832490002	919.641496156	783.630468865
U91324	841.978346001	0	0	0	0	0	0	0	0	0	0	0	0	0	0	0	0	0	0	0	0	0	1278.72904563	0	0	0	0	0	0	1700.59784517	0	0	0	0	0	0	0	0	0	0	0	1660.00727083	0	0	0	0	3309.37346941	0	0
AC011747	882.497848806	2915.96055872	2326.37086955	899.882324025	4496.42042934	1884.50615574	3473.09599698	610.343673752	2749.88994711	2415.15118846	1211.6162827	3239.98350622	8655.43015877	6360.28509808	174.491310717	1214.72773524	1310.02435606	1245.2452386	261.90067958	250.468992753	3008.50158521	2292.6240954	6350.31179074	3308.07031834	261.619423359	728.128937832	4317.22182504	7418.71188368	405.183477498	1612.68172164	601.750690477	57.6219789589	1859.27890821	50.9151799943	2120.37442728	601.006493555	1883.89470014	1829.60929913	790.986071619	1336.72138954	6199.6617652	3424.5527396	4851.04634167	4182.40309553	1379.93840463	1333.52399307	660.692246909	1474.39397304	918.09274254
RP11-734K21	0	6659.35912991	386.391037196	7174.22596547	10291.3215858	0	2671.73851695	11413.4135158	1256.01868453	10743.4877198	5025.54818186	0	0	1064.455013	9946.47457729	24484.0996176	7427.8762501	975.032029802	0	16473.9312051	63277.4784461	1018.85977365	0	0	9081.64168837	347.034365772	10461.4547699	4714.45434022	1269.0411696	4652.18627168	1413.51963208	56848.9839902	399.637648544	5581.35069803	9860.94830275	0	794.283068188	557.118893072	0	18227.1700451	0	3330.17370489	1363.52418278	361.005812735	398.077960185	5060.13407106	0	0	0
RP11-400L8	12264.4177813	9972.76327541	2571.74319665	7460.97583222	9914.04299405	5156.10095646	9446.98988339	9168.2438229	3134.93054561	5107.61097881	7167.65702283	4810.33121707	4955.80747184	2656.80166688	4455.88971546	2858.97157789	7415.77380407	3785.61315576	0	8375.83275289	5353.7609055	2825.55476942	5820.69127694	701.631169684	0	4042.13755163	11604.8995886	8825.1992779	11613.9236163	3096.40422319	3136.0367669	6306.26203938	11969.5952332	3714.8378984	3516.02913733	10962.5542898	5947.41690467	11124.2232743	5092.18012993	7730.95216042	13149.284983	25187.4830299	8319.07116814	6607.65629134	3974.29360657	8419.81575572	13055.5120372	6206.17535135	17627.6955776
RP11-214N9	5149.79686197	32879.9212867	10438.7261622	2923.98790597	30780.0872515	12990.1996161	8089.09201498	8799.36351271	8775.66076338	25378.6240496	4347.31611334	7309.91691221	15458.3413061	2974.89080601	12473.442704	4001.58222561	14300.7086116	6055.50108969	7132.13982917	5115.6221188	4246.27919785	4429.3873398	8472.85574018	9034.80136744	12022.5610036	5819.25585296	14386.5594265	11528.7760996	5319.98843789	50706.7084975	1755.75148523	15299.4567075	5212.14985638	4679.55207328	20341.1172556	24550.1215794	23678.1488423	6228.04290499	10453.3884005	10987.1605873	23925.8512105	3384.37058181	8891.67024098	6053.5364676	4820.96466947	8380.34620258	3373.5232402	5791.01500857	8388.73289547
RP11-521D12	0	838.319939775	0	376.306022971	3636.58410427	433.426736795	420.418021639	2146.92568499	1317.62617522	2737.11022343	0	0	714.15407401	893.333072033	321.05684207	0	207.792326531	545.523826981	0	192.021939659	1237.61610386	570.045153277	146.787848843	1238.57541356	85844.1364318	728.112678058	0	741.854621717	532.514964336	390.430013761	1383.99568154	4770.99331484	1173.87144942	1171.02298929	3251.16818537	184.304542245	499.94550594	467.556379702	428.053491491	299.940540537	165.801205101	508.148091123	190.720639845	0	334.082890058	1651.48129615	253.259705672	782.545479587	2222.70121433
RP11-95D17	24461.9335621	23406.2767215	25598.4361114	23923.3846238	29310.0406167	36696.1933902	24743.2465926	25675.7039173	28107.6456131	57243.2615464	42934.0289372	22243.3952193	33567.2307656	49256.4944133	21668.504862	28022.9651458	24291.8297717	34106.0027715	60738.8016162	42697.8701313	17085.3075508	37957.7559375	22555.8542658	46487.8967135	48828.9320366	22991.0535843	23807.8232507	33528.1092963	42518.3779672	43643.1514779	30262.1239049	30027.7744935	23444.4192063	21169.7470766	33305.6068609	9551.32193211	41976.5449528	22680.8257004	31082.3670151	29822.7788147	40564.1808142	27558.8950812	24249.8548744	28937.3365628	35834.6551766	35115.7190896	19992.4669605	14461.2273275	37905.0012937
AC010969	1872.45930678	8797.14593518	1177.91596041	1063.15812336	1651.21950817	0	113.122427879	266.619741592	1063.60620363	389.900029632	0	1258.99393794	0	4506.94312616	129.580777676	1454.96998833	1174.13002417	110.088608119	0	155.002784625	726.560697789	0	0	2428.07436706	0	1057.93685387	10799.3474494	0	10531.4106846	315.160545934	1117.18059368	213.956236963	406.099451319	0	0	0	0	7359.65144691	0	121.058091299	0	1230.5526535	8313.42729354	855.966933264	539.352725491	11426.5603539	58672.7768128	1263.36322451	31398.4192062
RP11-254F7	843.866189826	3659.66126175	1415.61200623	2464.12946208	4961.06309629	946.055892982	3058.87103188	1441.8986922	6902.47039415	4920.083782	0	3026.10202125	0	3899.81948711	1401.5642859	2360.57462681	907.111344743	1190.73418288	5259.15355677	838.266180528	982.323095889	4354.90212669	1922.39422667	5406.96486593	3502.33715336	3178.55467305	0	4318.05963672	1162.33927754	1704.41084483	2589.33977446	4628.36272247	732.071656638	9201.72010821	15483.1417617	0	1454.99835585	2041.10374726	0	0	723.800328099	4436.61136061	1665.17078824	1322.60873993	1458.4291187	9269.34873556	5527.9893155	0	4851.56868196
AC104794	1206.29589956	0	0	0	0	0	0	0	0	0	939.989208924	0	2228.29804823	0	0	0	1296.70403768	0	0	0	0	0	0	0	1251.63651474	0	0	0	0	0	0	3308.0925869	0	0	0	0	2079.90149587	0	0	935.872167349	0	0	0	0	0	0	0	0	0
RP11-320M2	2791.06455711	6517.66255516	4862.17905848	4806.43468758	31050.0854919	1444.178876	2801.66761482	4402.1915577	1756.13336896	2324.72054177	1840.29832574	3079.61551963	9518.25201664	5209.02871024	1069.76213037	2202.12571195	4846.55154299	3029.47772713	4906.14324957	639.817541099	2124.3507453	2690.80498122	1630.32482429	3930.41533731	8019.6128543	970.42924188	2786.08379008	10436.7476787	2957.2351271	8022.30112987	2415.53545037	2355.10527578	5028.86873316	6503.08545392	1969.61814767	2661.113673	2036.00169247	4414.04695144	8557.65126228	2998.20769642	552.449993723	4797.26003082	3177.40803575	6729.98856827	3710.54983994	7336.9859295	9563.76839478	3476.59109813	9134.12280544
AC007249	2285.61328337	5506.77774204	2556.12532299	741.566626239	17020.2626227	0	552.330558793	3905.38552664	0	3172.87068648	593.67739511	1366.03390838	2111.01920359	0	1898.06985277	1420.80470116	4094.85485582	2150.07062982	0	0	2217.18674477	561.679105987	578.534294934	697.37025165	3952.53636235	1721.82435325	1647.77492713	4873.11386128	1049.39942871	769.400037239	779.2480023	1044.66081691	3965.63512786	4615.3476926	0	1452.79734312	656.810998694	1842.77787708	1687.0853197	1773.23147498	653.471551279	3004.1427128	2255.05922537	5970.48074908	658.359703383	2789.56109046	3992.68540035	0	1752.06447948
AC092687	1998.39462299	3851.82046665	3911.09794996	1296.75721544	3132.93329691	4480.7886188	0	1138.20675526	908.112624128	2219.32477044	1038.1473741	2388.74602031	1845.7406842	1539.22078872	2212.73512039	0	1432.11206993	0	0	0	775.426727021	491.096421871	1011.66705026	2438.94445533	3455.84595221	1505.45350532	2161.06410797	2556.44415661	0	0	0	1826.7697117	1155.76622605	0	0	1270.23342921	2297.09474942	805.603779893	2212.61986177	1550.40061706	6284.89276045	1313.31548684	657.226700492	0	2302.51110422	0	0	0	2297.84031733
RP11-791G15	33518.4509496	22150.4179507	28917.3872418	24235.8314184	92333.842014	12883.6924663	28465.4023862	28636.1814061	48305.5837338	98909.6014103	16417.5214505	23180.8654834	17690.3051157	55321.86677	31811.5863364	20538.4007819	12353.3331223	16891.4581923	135283.807523	33296.0180103	16164.5889596	19062.7885894	30543.0777387	18408.4452687	47695.9502412	10100.2012104	34175.6066947	22051.7702059	19786.3861749	37718.2216729	37221.4847307	89293.247231	20769.9719377	70778.0597297	128855.459683	10043.8940999	68525.609589	9265.46840996	99671.1118392	18574.5621001	41070.603859	26433.398221	33070.376596	6003.90328762	38895.154181	32727.0644641	11292.2896246	31015.0849619	7708.19207383
RP11-245G13	816.408504691	0	1369.55087804	1589.30114257	1919.85608759	0	1183.73664227	9067.38461753	0	1359.998368	20357.5970974	3659.54853979	0	0	1355.96024189	0	1755.19158245	575.995060266	0	0	3801.4412214	1203.77214038	0	7472.90464891	7623.85104859	1230.05239408	882.864223428	2088.77939043	6747.11476505	2473.42918696	0	0	9915.52152722	0	9986.23459974	0	20411.0073043	2962.03558984	0	7600.66246107	700.249341284	0	0	5758.08186777	0	0	1069.623963	0	6571.19194147
AC062028	9322.14768369	3821.56124856	1400.43538953	1083.4274702	1799.55456935	3431.68222623	2723.4694984	1188.70021575	2655.51602841	2201.89014886	4445.22808154	1372.0939479	4754.800863	2411.25622632	577.724280509	518.948260534	3140.85207204	98.1640379973	4624.68512398	1934.98485442	4939.94124709	5026.24933069	528.2734597	1782.99913509	5919.01452739	17818.7072318	1053.2358037	889.951292966	383.2926564	843.069024169	27608.1373562	1335.46658221	1086.33479843	168.575361194	4467.5017172	795.950337342	21830.8921518	1177.87909408	1540.51783352	63148.0177392	22913.2974846	1280.13869388	2745.53113329	2943.96570171	480.931154855	339.628633071	364.581624357	375.506111831	3679.65926355
AC099344	0	0	0	0	0	0	0	0	0	0	0	0	0	0	499.279290344	0	0	0	0	0	0	0	0	0	0	0	0	0	0	0	0	0	0	0	0	0	0	0	0	0	0	0	0	0	0	0	0	0	0
RP11-494G9	0	0	0	0	0	0	0	0	0	0	0	0	0	0	0	0	0	0	0	0	0	0	0	0	0	0	0	0	0	0	0	0	0	0	0	0	0	0	0	0	0	0	0	0	0	0	0	0	0
AC106875	0	464.619676272	0	0	0	0	0	0	438.158524878	803.107490584	0	0	0	0	0	299.691512542	690.984901375	0	667.686446433	0	187.069214674	0	0	294.193769697	333.4847076	0	0	0	0	0	0	0	278.82490082	0	0	306.439747013	0	0	1067.57491195	0	0	0	0	0	0	0	421.090219422	0	0
AC012456	0	0	0	228.245428886	0	0	170.000807504	0	0	0	0	0	0	0	973.672385531	0	252.069569941	0	0	0	136.484766594	0	0	0	0	0	253.5828081	0	0	0	0	321.534232745	0	0	0	0	0	0	0	0	0	0	0	0	0	0	0	0	0
AC096559	0	0	0	0	0	0	0	0	0	0	0	0	0	0	0	0	0	0	0	0	0	0	0	0	0	0	0	0	0	0	0	0	0	0	0	0	0	0	0	0	0	0	0	0	0	0	0	0	0
RP11-333O1	1388.79823123	669.212350448	1553.16840044	0	5987.44785988	0	0	2373.01408384	631.099179129	0	1442.93546462	830.037823786	0	534.84609202	1153.31673711	863.317985698	1492.88435334	653.219490241	0	459.860659921	1886.10867489	341.290871288	0	423.740349711	480.332832226	1046.22537578	1001.23101353	1184.41242188	637.642457295	3272.55267992	4261.42265465	5712.86837885	4016.03885437	3365.28673084	2831.2756153	0	2394.57293989	1679.57983631	4613.02664907	2873.23115585	1191.19906396	3955.02347306	913.488525899	1813.90989548	4400.40175668	5085.03017965	4852.11952711	1249.37765376	2661.50016255
AC064875	2380.37869709	1720.52943367	1663.81664119	3217.97183206	932.94482401	741.287646293	479.359269226	1581.73145363	721.129490699	440.589773471	515.243557948	1304.11599756	732.848549946	1680.64954355	219.640784087	493.237893445	6254.79726958	2332.51689022	274.722708634	394.097030761	3386.70211415	1949.8909231	1305.4628398	605.237006878	1372.13841391	597.73803971	3432.18895573	4905.98940103	3643.03104555	267.10022375	3652.00627361	181.329038495	1606.13331836	2563.57752371	0	1386.94672567	1482.09424934	7516.79844521	292.839124361	5745.45274347	0	8864.64880608	11742.7890794	2383.5770299	914.208555084	1291.20934991	3811.70984987	3212.12097419	6994.71420092
AC092635	0	0	0	0	0	0	0	1413.37761917	0	0	0	0	0	0	0	0	0	0	0	0	0	0	0	0	0	0	0	0	0	0	0	0	0	0	0	0	0	0	0	0	0	0	0	0	0	0	0	0	0
AC064846	0	0	0	0	0	0	0	0	0	0	0	0	0	0	0	0	0	0	0	0	0	0	0	0	0	0	0	0	0	0	0	0	0	0	0	0	0	0	0	0	0	0	0	0	0	0	0	0	0
AC016730	0	653.929856868	0	0	0	0	0	386.470442741	0	0	0	0	0	0	0	0	0	0	0	0	0	0	0	0	469.363693029	0	0	578.682271027	0	0	0	0	0	0	0	0	0	0	0	350.952062756	0	0	0	0	0	0	0	0	0
AC011897	0	0	2737.12263632	0	3836.93781667	0	788.58756082	1858.63241827	0	0	0	975.174495286	0	0	903.320334554	0	1169.28225363	0	0	0	0	0	825.999831496	0	0	0	0	0	0	0	0	0	0	1317.90853188	0	0	0	0	0	0	0	714.85862241	0	0	939.970212344	0	0	0	0
AC068286	0	0	0	0	0	0	0	0	0	0	0	0	0	0	0	0	1732.64094114	0	0	0	469.075054354	0	0	0	0	0	0	0	0	0	0	0	0	0	0	0	0	0	892.312792218	0	0	0	0	0	1392.84665298	0	0	0	0
AC008278	0	0	0	0	3245.91805518	0	2001.35424971	0	0	766.453847982	0	0	0	1063.15372326	764.178082532	0	989.172762238	0	3823.2803363	0	535.594255216	1356.81896507	698.767583613	0	0	693.220236762	0	1177.17273715	0	0	0	1261.76636566	0	0	0	0	0	1112.87563726	0	0	0	0	0	2163.38691201	0	1123.09957513	0	0	0
AC008271	169.304687657	0	0	0	0	0	0	0	0	0	0	0	312.743585717	195.604981022	0	0	181.993549148	0	0	0	0	0	0	0	0	0	0	0	0	341.955572106	0	0	146.875375106	0	0	0	0	204.753097454	0	0	0	0	0	0	0	0	0	228.462445457	0
AC113608	0	0	0	0	0	0	0	0	0	0	0	0	0	0	0	0	0	0	0	0	0	0	0	0	0	0	0	0	0	0	0	0	0	0	0	0	0	0	0	0	0	0	0	0	0	0	0	0	0
AC010145	0	0	0	0	0	0	0	0	0	0	0	0	673.671502954	0	0	0	0	0	0	0	0	0	0	0	0	0	0	0	0	0	0	0	0	0	0	0	0	0	0	0	0	0	0	0	0	0	0	0	0
MYCNOS	155.973609889	3833.0641921	523.301247226	303.633579247	4951.60562002	1224.03087356	339.226642408	666.273121343	212.63308439	4417.03572732	0	0	25642.5114809	360.406028025	2849.59568447	2617.86063048	2682.61357484	1430.55880488	1296.08094285	0	817.04204453	459.957693091	236.880183753	0	0	117.499824632	0	997.645357427	0	315.029936507	0	641.602706451	676.551924701	0	953.927507352	0	537.860975309	1131.78483789	0	0	401.344732282	615.021342778	1692.77411668	0	673.9115074	571.091246865	408.70008035	1894.25948871	0
AC142119	0	1293.35096889	250.143801418	0	9467.68966807	334.343049342	0	0	0	745.19720402	0	0	1101.78920927	0	495.323036063	834.244281742	320.579762088	0	0	0	0	0	0	0	0	0	0	1526.03375434	0	0	0	0	517.43892054	0	0	0	257.10351296	360.670471981	0	0	0	587.974049177	294.241747843	0	0	0	0	402.434244257	0
AC010745	0	0	0	0	0	0	0	0	0	0	0	0	0	0	0	0	0	416.85042823	0	0	0	0	0	0	0	0	0	0	0	0	0	0	0	0	0	0	0	0	0	0	0	0	0	0	0	0	0	0	0
AC010880	0	0	0	0	0	0	0	0	0	0	0	0	0	0	0	0	0	0	0	0	0	0	0	0	0	0	0	0	0	0	0	0	0	0	0	0	0	0	0	0	0	0	0	0	0	0	0	0	0
AC104623	94.0440581365	0	0	91.5377094858	0	0	0	0	0	0	0	0	86.8601937842	0	0	0	0	0	0	93.4199691443	0	0	0	0	0	0	101.699252124	360.917278482	129.536061415	0	0	0	163.170394233	0	0	0	0	0	104.125455764	0	0	0	0	0	0	344.338625359	0	0	0
AC008069	0	766.295268893	0	0	0	0	0	0	0	0	0	0	0	0	0	494.279945333	0	0	3303.63730467	0	0	0	0	0	0	0	0	2034.35344857	730.145518002	0	0	0	0	0	0	0	0	0	0	0	0	0	3661.03042316	0	0	0	0	0	0
AC080094	0	0	0	0	0	0	1357.46913455	0	0	0	0	0	0	0	0	1745.963986	4025.58865428	0	0	0	0	0	0	0	0	0	0	7186.02461932	0	0	0	0	0	0	0	0	1614.25190724	0	0	0	1606.04450911	0	44338.2788989	0	0	0	0	2526.72644901	0
RP11-111J6	5514.49554084	3985.85817519	4239.92216274	3578.35324407	15129.1223312	1545.57116582	4664.12471869	5889.07341319	15035.4178061	3062.07202759	11100.8249435	2471.87088182	6791.00357557	14865.9785577	2671.35757056	3427.97324724	5433.80739598	2269.51899814	9546.53026584	1369.47515207	2407.23132289	3726.69629051	2093.74316262	3785.72422324	4291.3251934	4846.61669805	15902.3358047	4115.0739273	12026.4505957	8353.48611859	9400.45209124	4410.79011586	8371.89638104	7238.0373338	9134.23442556	14458.7926054	3169.37370798	5557.58407374	7123.24912762	7486.97733879	8277.30631621	18120.2258867	6347.57411586	8282.85742015	3573.95267551	9534.69028802	7224.85929587	6821.23587152	9511.2071743
AC106053	0	0	0	995.472590658	0	1146.57860943	0	0	2788.49800344	851.846803871	0	0	0	0	16137.0322809	0	0	0	0	0	0	0	776.619406787	0	0	1540.90802628	1105.97936685	0	0	0	0	0	0	0	0	0	0	0	0	0	0	0	0	0	0	0	0	0	0
AC010096	0	0	0	0	0	0	0	0	680.482271395	415.755469263	0	0	0	576.697444048	0	0	536.567188004	0	0	0	0	0	0	0	0	0	539.788338197	0	0	0	0	0	433.029123157	0	0	0	430.32444742	0	0	387.257448558	0	0	0	0	0	0	0	0	0
AC019055	0	0	0	0	0	0	0	0	0	0	0	0	0	0	705.527845949	0	0	0	0	0	0	0	0	0	0	0	0	0	0	0	0	0	0	0	0	0	0	0	0	0	0	0	0	0	0	0	0	0	0
RP11-79O8	690.57673516	998.292919108	1158.46413721	4705.20622667	12991.6133046	2322.61061433	4005.15663917	1769.96371574	0	5751.9197032	1076.24452545	1857.30481855	3189.12381215	797.852977637	1720.45230691	1931.77299736	742.333320652	2923.30703981	0	3429.96987629	3215.5310148	2545.59154456	1048.7924466	1896.33525311	716.533197431	4682.09851656	5974.31790092	2650.25862107	0	5579.20907737	0	1893.80713231	0	836.690554182	0	4608.96625002	1190.69590222	835.167221357	764.605640305	0	8292.49403422	2269.18425095	1362.69022304	4329.42016887	596.751731139	3371.35945856	1809.52897961	4659.37629589	1588.10982176
AC079145	13217.9705963	11062.4141406	6418.662202	2708.5686755	46624.822933	21058.0500246	7565.19305112	4754.800863	16122.7758868	5794.44776016	16263.0295666	9355.18600838	5782.86591446	4018.76037719	16176.2798543	3892.11195401	11965.1507506	4908.20189987	14452.1410124	6910.66019437	7288.43790555	9231.88652575	15319.9303313	2547.14162155	6496.47935933	11005.6721138	33854.007976	19578.9284452	1916.463282	10538.3628021	12807.8987735	2861.71410474	13880.9446466	5900.13764178	3191.07265514	34491.1812848	7796.74719707	11778.7909408	32350.8745038	2158.90658937	40575.6309622	7772.27064144	13727.6556665	3271.0730019	0	6792.57266142	1822.90812178	15959.0097528	7999.25926859
RP11-644K8	656.831275153	0	3856.49274298	0	3089.1925179	1472.74320513	1904.72108931	1122.31556147	1790.86782769	2188.33943333	1023.65316993	588.848822634	1213.3141205	758.865397578	9272.82758786	1224.91714201	706.058743028	463.409638364	1364.50406418	0	2293.80157469	0	2992.62766176	601.2232187	1363.03871763	989.623304837	1420.59478883	0	0	1989.96658846	0	2701.89761024	1139.62987386	795.805151883	0	3131.24732768	2265.02361853	0	2908.97084793	0	1690.13060907	431.659831333	3240.2538026	1029.46509251	1135.18217616	1603.30794495	860.552612466	886.338597298	0
AC098828	0	729.315872539	0	491.064227027	7118.39401913	0	0	2586.14001362	0	9244.70740501	3538.18994458	1809.17091351	465.971173625	0	1256.89880331	470.427293815	0	0	0	0	5579.22648429	0	4214.14927436	1385.3923766	0	1520.25242271	1636.73085925	1290.78726406	0	509.495467019	0	4842.40898779	437.672867105	0	0	481.020031839	434.939186803	0	1675.77777734	782.820686898	0	1657.78206001	0	790.72854961	0	0	660.98746239	0	2900.53569994
AC023137	3665.88624022	1766.4598731	1024.93986165	11893.958226	11494.2033296	2739.8761576	12402.3316383	0	16658.559501	20355.8197289	16187.3466368	6572.92939031	9028.9479357	1411.78530134	4059.07578903	3418.23468688	10508.3547988	2586.3674297	5077.01836865	9710.8238056	1422.45487262	12612.2490162	22269.8136388	4474.03771837	8875.24074091	8284.88211533	3964.28967858	12505.5493375	0	4936.15088826	11248.4955137	1675.52741414	3180.23336552	0	0	2330.13599839	26336.415045	5911.2485148	4058.86435681	2844.07905402	11529.1052261	2409.1663963	3616.88070563	4788.01540592	0	1491.38872152	3201.92627885	3297.8702354	0
AC012065	11135.0390729	4292.46265021	8094.39685614	14451.0419472	16583.8456323	1664.4612555	3767.17765741	10781.5344026	37443.9731901	9892.84808913	26030.470401	5989.53329057	15769.4938798	20583.6626183	11096.40837	8306.24286831	5585.80200845	17283.2600628	16963.4499339	23597.1103126	13394.0819761	9850.9873973	22548.0032898	14269.2682261	6932.14069704	10066.0500652	32913.2479034	4748.16222381	13292.3927636	9745.73380503	20500.2166759	11196.6210633	6439.92029311	12591.6152434	3405.06963793	8493.27677519	13439.3635117	10773.1629737	12328.7004132	9790.6626738	7640.59044573	10244.8969437	10986.1859698	7562.60894884	7697.74422417	18120.2258867	16533.8126194	23039.5589227	5974.98912232
RP11-130L8	5143.93148969	2478.67717956	11505.4752579	4172.36803374	13104.4391035	961.141066674	6215.29148163	10986.6768232	2337.51085482	7854.84251041	6012.50500833	3842.94277186	11877.4884576	8914.50764308	4983.69441979	799.404922975	4607.87767375	604.860416362	37401.0874811	4258.16305826	4490.9395295	3792.29355386	3255.07906262	4708.44060567	8005.91192118	4520.93288804	5562.64793167	2193.45626193	12989.6047736	1731.58823871	3507.50353655	3526.62262111	13387.4060581	4154.86425539	0	3269.62135537	6651.89453347	8294.59928272	12339.9338532	1995.39031581	7353.41563399	10141.5478368	8458.6124323	3359.24543285	3704.21063179	8370.80138913	23587.7667102	2313.7677278	24644.6427352
AC012361	0	0	0	0	0	0	0	0	0	0	0	0	0	0	0	0	0	0	0	0	0	0	0	0	0	0	0	0	0	0	0	0	0	0	0	0	0	0	0	194.921305883	0	0	0	0	0	0	0	0	0
RP11-116D2	0	0	0	0	0	0	0	0	0	0	0	0	0	0	0	0	0	0	0	0	0	0	0	0	243.308780436	0	0	0	0	0	0	0	0	0	0	0	0	0	0	0	0	0	0	0	0	0	0	0	0
AC010872	0	0	0	0	0	0	0	0	0	0	0	0	0	0	0	0	0	0	0	0	0	0	423.401395108	0	0	0	0	0	0	0	0	0	0	0	0	0	0	0	0	0	10043.1316637	0	550.123090041	0	0	0	0	0	0
AC067959	0	3084.29501652	357.915507244	415.344572973	0	478.391075136	0	364.561687483	3490.36484784	0	0	0	394.120743225	493.004390944	354.36375936	0	1834.79210773	0	0	0	496.730272978	0	324.031679929	781.181188923	1328.26732177	0	0	2183.50861449	1175.5177274	0	2618.69736827	585.104811288	370.1858944	0	0	0	0	0	0	331.056821103	732.006681025	560.864134589	842.025137818	334.401075969	51255.0197194	3124.81446414	3913.46545193	575.818612531	1962.63005184
AC011752	0	1011.28186044	0	0	411.270286421	0	0	0	0	0	272.561926751	0	0	0	0	0	0	0	0	0	0	0	0	0	725.856120074	263.501000777	0	447.456923322	0	0	0	0	0	0	0	0	0	0	0	271.368137744	0	0	0	0	3929.35503264	0	0	0	0
AC009411	0	0	0	0	0	0	0	0	0	0	0	0	0	0	0	0	0	0	0	0	0	0	0	0	0	0	0	0	945.991455805	0	0	0	0	0	0	0	0	0	0	0	0	0	0	0	2373.9393684	0	0	0	0
AC018742	0	0	0	0	0	0	130.053048639	0	0	0	0	0	0	0	148.974659559	0	0	0	0	0	0	0	0	0	0	0	0	0	0	0	0	0	0	0	0	0	0	0	0	0	0	0	0	0	0	0	0	0	0
AC068490	0	0	0	0	0	0	0	0	0	0	0	0	0	0	0	0	0	0	0	645.711082065	0	0	0	0	0	0	0	0	0	0	0	0	0	0	0	0	0	0	0	0	0	0	0	0	561.709315149	0	0	0	0
AC096570	0	0	0	0	0	0	0	0	0	0	0	0	0	0	0	0	0	0	0	0	0	0	0	0	0	0	0	0	0	0	0	0	0	0	0	0	0	0	0	0	0	0	0	0	0	0	2241.34839519	0	0
AC016768	0	0	0	238.498641512	0	0	0	209.338156484	1002.11646998	0	0	0	0	566.184730224	0	228.475755981	0	0	0	0	0	0	0	0	0	0	0	313.452896806	0	0	0	0	850.270726199	0	0	0	0	0	2441.66058964	0	0	966.176106851	241.753311053	0	211.738081687	0	0	0	0
AC012506	0	609.943543626	0	410.688243679	0	0	0	0	0	351.434555857	0	0	0	0	0	0	907.111344743	0	0	0	0	0	0	0	0	0	0	0	0	0	0	0	0	0	0	0	0	0	0	0	361.900164049	277.288210038	416.29269706	0	0	0	0	0	0
AC011239	1933.37835957	3726.50438982	540.550474982	627.284098223	0	0	1868.84449345	0	0	536.780177782	0	0	0	0	0	1201.84507256	0	0	0	0	0	0	0	0	668.682521575	970.983139849	0	2473.27217206	0	0	0	883.668567732	0	780.815671283	0	0	555.590125608	779.394067876	5708.35717762	999.973000729	0	1694.11700927	0	0	0	1573.10865147	844.343573532	869.643863445	0
AC008073	693.120295879	0	0	674.648090906	1629.93306884	777.055116519	0	1184.32194608	944.905400796	1154.62108223	540.10429684	0	640.174024907	0	1151.19276521	0	1490.13502672	489.012380815	0	0	806.843647821	0	1578.9831033	0	0	1044.29862555	0	2660.02016295	1909.40448538	2099.9094939	0	0	1803.88927547	3359.08914939	0	1982.54665056	597.540761243	838.243343719	0	537.738703891	1783.50799078	911.016881598	1367.70933988	0	598.949711733	0	5448.58173417	0	0
AC009228	2401.04829769	1735.46934901	1510.43769086	1168.52922922	1411.56882995	2018.85611612	870.33906234	2564.14201244	1636.63040712	1999.87000845	935.4916529	2690.67284983	554.409083771	1387.01713816	498.482991636	0	645.249856069	423.498760419	4987.94787096	0	349.374880994	885.070106403	2279.0744952	0	1868.47173493	904.392589588	1947.37036842	3071.53843378	1653.59909978	606.193968734	1227.90594302	0	4165.91973028	727.266909137	0	2861.57052434	1034.97490703	0	0	931.394310089	1544.56912121	5522.76741141	2368.95110544	470.401513564	0	2197.83601066	4718.62820041	0	4141.24331513
RP11-443B20	13926.8385805	66290.0735771	41881.9288594	11902.5459215	79079.7039543	22467.9736173	10096.4829763	20314.1142466	16207.5154712	54038.4550094	24351.489398	14617.0559727	25098.5195325	9418.69760604	134553.966296	34207.0272636	37974.2352117	9825.70634846	50806.8408589	14509.2678792	16014.1715533	11519.4909787	15476.3145324	9949.48460115	19384.5510767	11003.3071335	6979.24885651	14339.6213297	16375.5560671	38420.0047476	13897.058236	38658.1072339	18270.0771204	21812.0998714	25448.9004257	19755.6837264	23427.0493397	15199.5911721	69200.9509113	11595.3547955	44867.7813494	8929.28098751	12064.9739061	10913.9094848	15263.4874192	8291.47520269	5340.3968983	12834.31088	2343.46530558
AC013267	0	2037.71401091	0	0	1657.40385089	3160.60620427	2043.82993291	0	0	0	1098.4143565	0	0	0	0	0	0	1989.01665006	2928.31771076	0	0	0	0	0	1462.58648914	1061.89916418	0	0	0	0	0	0	0	0	0	0	0	1704.74208105	0	1093.60343151	0	926.371098704	0	0	0	0	1846.80392113	0	0
AC012074	4785.17378399	15940.1276774	10644.8701607	6277.69558553	43543.2699932	6764.11659471	1357.46913455	5510.14132624	1418.14160484	16635.7345976	5025.7466162	2797.76430654	4611.80093565	11537.774403	32999.9047149	15713.675874	7380.24586618	2935.6962165	864.412193226	8886.8263185	1574.21484521	4294.71829409	5845.46702201	5522.67895253	6044.38728181	1724.04524334	2699.83686236	6919.87555935	9743.3459395	2521.28436747	2340.75933914	3423.29979141	7400.03444626	2268.63856731	2544.86133249	8529.66311848	7174.45292106	3774.18022918	13821.2296506	3228.21576797	7673.32376577	14082.991479	9237.14143726	4402.11565678	5753.09573857	18028.5730029	2180.63746575	7580.17934704	6459.10337956
AC104699	909.092561986	110390.941635	3812.57822934	5309.18715017	1068.9053821	3057.54295848	8567.79432021	1553.34979884	7435.99467583	6057.57727197	6375.57898227	4075.00453344	15113.6737185	16805.0192391	24913.312995	11019.8161725	4886.13115646	10903.558665	0	0	4233.00580451	1340.4322626	6212.9552543	33285.111528	0	2054.54403504	2949.2783116	12792.5124262	0	5508.45823762	1859.65465283	13711.8040558	0	20927.3688129	0	4333.82782309	783.730998442	0	23150.5596648	7052.94966698	3898.73123589	1194.88446065	5381.63892432	3562.09841793	2356.73690921	6657.21342361	0	2453.48800122	5226.56915979
AC015977	0	0	0	0	0	0	481.219217008	0	0	552.874116093	0	0	0	0	0	0	0	0	0	0	0	0	0	0	0	0	717.81376896	0	0	0	0	0	575.844724622	0	0	0	572.248030608	0	0	514.977277271	0	0	654.908440525	1040.35890301	0	0	0	0	0
AC013472	0	0	0	0	0	0	0	0	0	3073.32964534	0	0	0	0	0	1146.85869669	0	0	0	0	0	0	0	0	0	0	0	0	0	0	0	0	0	0	0	0	0	0	0	954.222602003	0	0	0	0	0	0	0	0	0
RP11-503P10	2284.45718156	11558.3838737	2874.18644057	2223.57458793	12087.2274771	3841.64729836	2070.19192749	975.852529166	778.579108698	2378.44934616	3560.26261832	2560.01802253	7912.31780405	1319.66577485	5217.05188666	1597.5967884	4297.42278951	1611.73731583	10677.9172366	4538.59443418	2659.27830511	842.092498808	3035.7687282	1568.28939749	7703.54735022	3441.90685081	1852.80913657	8767.16812433	6293.21174848	4037.30702393	1168.28076824	783.099307368	2972.72193196	691.951975765	6985.81813427	1633.57030539	4431.23171501	4144.15298003	5058.69589033	1772.33454454	5878.26912896	4503.93475	5634.7964458	2237.79779214	1974.08008177	6273.33768749	748.249843616	2312.01221359	3940.15107524
AC013403	0	0	0	0	0	0	0	0	0	0	0	0	0	0	0	0	0	0	0	0	0	0	0	0	0	0	0	0	0	0	0	1962.21461428	0	0	0	0	0	0	0	0	2454.86651203	0	0	0	0	0	0	0	0
RP11-195B17	23522.7700414	35137.8309757	15784.0738695	10684.7391397	25814.0649777	7032.3488045	20463.8472033	12727.7599143	11758.1665812	9143.15569488	15885.8176308	14761.7039224	13035.5435822	7247.16454687	13674.0115643	18278.0604784	16014.2948653	5531.95255797	14659.8905395	17914.446833	12322.0153341	4624.49130596	13694.388873	15789.6247811	7322.07361125	6497.49551082	13566.6802333	20060.9853956	21600.1382409	15044.9765615	3207.90427614	1075.13009074	31289.9627241	6649.94680043	7193.20961013	14951.7059897	10815.4877785	13275.6789562	12154.043824	3649.90145266	32281.4946332	26795.28403	10830.5483352	9216.92965639	6775.61861398	8612.76986679	14381.9855358	6348.40020315	9015.83180064
AC074117	20075.7052639	54215.6148625	36175.6909904	22546.929017	109723.826685	73456.3046285	18632.5767814	21109.5320846	28872.2325514	36842.1246054	35069.4215531	26007.892357	114309.338798	19880.8499879	29221.300881	38776.0589001	37350.548893	29806.3938528	16040.5211061	14792.4990415	31715.9076464	19029.2666869	27055.125782	35944.4085393	17968.9809608	40966.8373037	34950.5038837	23988.5171202	36616.4125396	30411.1453172	16697.6494561	40988.546953	39712.5272354	13097.1988566	18214.9270315	25451.2040996	44504.52767	31349.3674898	50073.6020885	25587.820266	37276.9896995	34071.0167574	32649.4506839	23080.1427269	11152.3663939	17366.8982074	13295.6891907	30811.6961794	12937.1373083
RP11-158I13	0	625.008203233	181.321928426	0	0	0	0	0	0	0	0	387.605256024	0	0	0	0	0	0	0	214.742513794	0	0	0	0	0	0	0	0	0	0	0	0	0	0	0	0	372.733639696	0	0	0	185.419268427	142.068399399	213.287240539	0	0	791.52393951	0	0	0
AC074091	0	0	0	0	0	0	0	0	0	0	0	0	0	0	0	0	0	0	0	0	0	0	0	0	0	0	0	0	0	0	0	0	0	0	0	0	0	0	0	0	0	0	0	0	0	0	0	0	0
AC093690	1248.60201168	2062.82328309	598.448298368	1562.56171576	1887.55519133	1599.77603136	1551.76092537	914.341445574	1459.00559042	3565.64501033	3335.84796039	2238.74182709	1482.71585769	206.080508442	2370.03856497	2993.79037979	1917.40123107	125.845366248	0	885.94008653	934.370831019	920.51485711	2844.41458562	1795.97627842	370.152220474	806.238133182	3472.04138673	4563.6364881	1965.5102096	2161.61299562	1094.64032171	2201.21421422	3559.04789279	1728.89612144	818.184979351	1700.66797987	1537.74707751	2804.34112005	2567.40803865	830.309335202	4130.80737013	2696.13503182	1759.87244445	1258.0453749	154.137295484	1306.20206511	2336.95093338	2888.37165641	410.198982399
AC104695	0	0	0	0	0	0	0	757.463859506	0	0	0	0	0	0	0	0	0	0	0	0	0	0	0	405.77256103	459.965362308	0	0	0	0	0	0	607.847401126	384.574745419	537.098176713	0	0	0	0	0	0	0	0	437.377015051	0	383.0738439	0	0	0	0
RP11-373D23	9226.9962485	4914.1774018	4480.64032424	6144.95596607	10849.0448201	2177.75962978	7041.32376887	10787.2627321	27805.8226717	4449.38820912	10595.8009409	11754.9421096	2691.20899761	7293.92044717	10485.5093286	15848.8472794	11484.6148576	3426.24158429	15132.7902343	19778.7553253	21199.1661661	24345.7090688	15119.5272382	16447.1399479	34264.1552217	3658.41389466	17855.5017265	21122.2762359	26087.3927658	10299.0399823	13907.8172488	5327.09619154	23592.5441241	41186.7672801	27473.4199303	4630.20572583	17583.8898076	14095.4674263	11829.1891965	10926.1566067	26241.7311212	15000.0398937	15811.6023622	12178.2399589	10071.6292172	7705.18766577	10180.0598079	21625.5181114	7817.59867101
AC074011	1943.36138036	3745.74623693	1086.68322681	630.523086682	4569.98445634	0	2348.11786612	3320.58597274	2649.31307727	8093.27772352	3533.45341186	1742.22224803	2991.51889436	748.416304324	19904.1427245	1208.05081303	2785.34705511	1828.11513103	0	643.488324467	754.072462593	1432.71675572	1967.61405644	592.944757857	1344.27054251	487.998411077	7005.17051636	1657.36196039	5353.56266211	3270.94335969	0	13323.471004	7305.59632562	1569.69484347	0	0	2792.29460719	1566.83695573	5737.83234377	502.568186253	0	2980.01305246	8308.65768522	2538.22503446	8956.41152416	3162.46283118	5092.22010612	0	2234.56072167
AC097724	5234.55244315	6810.32930212	23928.5681749	7387.81883693	27388.6562648	5281.59715498	4364.1027879	27726.9698447	5352.05458239	15477.7839301	3671.05660453	5631.32754441	5076.42865509	10885.8660787	39340.2915659	4880.92852832	18568.6575409	1661.89395344	16311.4220189	8319.7044009	4874.72712953	3666.14748873	6956.09037512	5030.95896426	7332.25730194	4929.19118282	6226.70998193	15401.4797474	20548.6711499	5550.59526169	10172.4920022	6459.75242281	20661.9334188	5390.77745792	16807.4995063	5240.37539554	10830.5301815	5380.96266055	13330.0858153	15635.182857	7857.10926399	45924.9438494	9038.00973729	5332.74372331	11308.4038064	88802.9679357	11658.7524312	8829.48567893	37618.2133546
RP11-713D19	0	0	0	859.938763761	3116.38611401	990.471662606	640.496000102	0	0	0	688.442800902	0	1631.99293673	5103.63700484	0	823.799908888	949.69873182	1246.63719616	0	2632.86420081	0	1302.67360731	670.882492248	2426.06270644	916.691531924	0	955.400016433	2260.39272063	0	0	0	0	4598.64730789	0	0	842.34963322	761.654068908	0	978.192661892	2056.28250854	757.78156416	580.612871723	1743.34782055	692.351523485	763.449984674	2156.56209497	4630.01546425	2384.37566315	0
AC105398	0	2706.8141339	6282.21845551	0	18713.8210926	0	678.734567273	3199.43689911	0	0	2188.63159093	0	0	0	7774.84666059	0	2012.79432714	0	0	0	544.920523342	0	0	0	2914.25815373	0	0	1197.67076989	0	0	1915.16673202	1283.73742178	812.198902638	0	0	0	0	2264.50813751	1036.5922238	726.348547793	0	6152.76326751	923.714143726	0	0	0	0	5053.45289803	0
AC106870	0	0	0	0	0	0	0	0	0	0	0	0	0	0	0	0	0	0	0	0	0	0	0	0	0	1417.63538418	0	0	0	0	0	0	0	0	0	0	0	0	0	0	0	0	0	1474.70874502	0	0	0	0	0
AC016907	0	0	0	0	0	0	0	0	0	0	0	0	0	0	0	0	0	0	0	0	0	0	0	0	0	0	0	0	0	0	0	0	0	0	0	0	0	0	0	0	0	0	0	0	0	0	0	0	0
AC109642	5099.78754285	7187.91192264	3315.08326527	4219.29304008	2098.70446973	285.867837581	2495.59112235	5446.19594106	1738.08818642	3079.57625031	3278.4989482	3086.07050642	1884.08940664	5744.70360423	4976.21791345	1664.34371836	5756.10085018	2878.41433911	4502.58607355	379.945850117	2077.78638575	4793.68001227	1839.47252448	4668.03393381	3439.45643889	2113.00667019	551.491066396	5056.02070946	4214.66112017	2060.07381244	4433.68883694	1398.54320747	9733.18034543	20544.5510907	4093.69652609	1215.58585282	1868.52939263	9251.34422032	28514.7137334	2967.39955501	437.418626466	6619.22275913	4276.87158416	3796.67563082	1322.07192468	9336.33589896	8853.02245527	2408.60712315	8356.13679084
RP11-182E7	0	0	0	0	0	0	0	0	0	0	0	0	0	0	0	0	0	0	0	0	0	0	0	0	0	0	0	0	0	0	0	0	0	0	0	0	0	0	0	0	0	0	0	0	0	0	0	0	0
RP11-523J2	529.096983124	254.952971375	0	858.326882292	0	1384.06115178	1917.88633583	0	480.865635082	0	412.291424345	1106.78192483	2932.08103067	0	0	0	2085.42092657	124.430048164	732.765537744	1051.17164906	923.862443041	1430.25504308	3348.12490274	4843.03051989	731.978617807	265.72359591	4005.15864433	902.462323326	242.925640947	356.217074411	0	0	2142.01285101	0	808.983273866	2186.00387478	1064.31697914	2559.5096662	0	0	1210.17786816	463.619650148	4350.20016141	1105.68603188	457.211377888	215.251980426	231.066844865	2617.89699099	0
AC009305	0	0	0	995.472590658	0	0	0	0	0	0	0	0	0	0	0	0	0	0	0	0	0	0	0	0	0	0	0	0	0	0	0	0	0	0	0	0	0	0	0	0	0	0	0	0	0	0	0	0	0
AL133247	0	0	0	0	0	0	0	0	0	0	0	522.307082615	0	0	0	0	0	0	0	0	0	0	0	0	0	0	0	0	0	0	0	0	0	0	0	0	0	0	0	0	0	0	0	0	0	0	0	786.179591721	0
AL133249	1800.78622327	0	0	0	0	0	0	0	0	0	0	0	831.613625657	0	0	0	1935.74956821	0	0	0	0	0	0	824.164842859	0	0	0	1151.82691267	1240.19932484	909.290953101	0	0	0	0	0	0	776.231180275	1088.91420009	0	0	0	0	0	0	0	0	0	1215.00482357	0
RP11-1057B6	0	3643.32348826	2113.93846466	817.70962804	1975.56619727	4709.16214587	1218.08614305	0	1145.2759657	699.73130318	3927.81205157	0	1551.85042645	970.60239467	2092.96095372	0	5418.37044315	0	1745.22506422	834.523920794	1466.90658739	1858.05454257	1913.81210958	768.975232846	0	632.872939366	908.48305134	0	1157.1502629	1696.80186784	859.260073965	0	4372.8208776	0	0	6407.87399557	1448.50282748	3047.98751544	5580.93849062	651.768116547	5043.98353644	9937.81138476	828.86849504	0	725.959137212	0	0	2267.28578684	0
CTC-336P14	6109.81040036	12365.2191117	9224.45875488	8325.77075823	18678.0804106	9589.56655159	8858.80831311	14615.6094709	1665.8559501	15266.8647966	3808.78744395	4381.95292687	7900.32944374	19764.9942187	10147.6894726	7975.88093605	5254.17739942	1724.24495314	17769.5642903	6069.2648785	2844.90974524	14413.9988757	12062.815721	2237.01885919	10143.1322753	11967.0519444	6607.14946429	12505.5493375	6732.51062054	14808.4526648	6249.16417429	6702.10965657	8480.62230806	8883.04581875	11210.196795	19806.1559863	18962.2188324	4433.4363861	10823.6382848	6636.18445938	8384.80380083	24894.7194285	3616.88070563	7660.82464947	7391.58394252	7456.94360761	16009.6313942	21436.1565301	22481.0351393
RP11-563N4	2114.40629586	10697.9985573	6207.22006103	4116.11138609	13052.0553258	7111.36395961	2682.52678695	1354.81773185	2882.49231816	6163.92518756	2883.3376858	2369.45488321	7323.33909111	3664.296681	4828.70392319	3450.24062964	4545.74898601	6339.99057206	3294.3574246	6301.12443566	1845.9948066	389.704323536	2006.9939726	1935.39833885	2742.34966713	0	8002.81699158	5409.7039269	2912.37818978	22954.4881896	1081.31604814	3624.03401373	3668.58380742	1280.8886293	0	1511.97026862	3645.6700377	1917.83484118	7023.20349381	2870.70900771	1360.17533567	4516.05910618	3129.21139701	2899.70820651	2740.69966408	6451.51300883	2770.2058817	3566.51696806	2431.23554175
AL133245	275.724777042	797.171635039	925.073926416	805.129479917	2269.36834969	927.342699495	399.782118745	0	751.770890303	1148.27701035	859.418705302	988.74835273	763.987902252	318.556683379	1373.84103629	1028.39197417	1185.5579773	0	0	547.790060829	802.410440965	0	418.748632524	504.763229765	572.176692454	415.424288404	894.506389012	1058.16186702	379.782650389	0	564.027125475	0	956.788157833	334.06326156	421.58005041	262.88713828	713.109084297	333.455044425	1221.12842188	0	1182.47233089	1812.02258867	1088.15556272	432.149082791	714.790535101	673.036961507	1083.72889438	744.134822347	2219.281674
AL133243	4134.49486746	5614.56686696	4308.56876597	9268.10166961	7660.25135347	8146.66239669	5631.41822727	3960.42147448	5294.80446458	2608.85172956	4686.17789376	3594.25166838	9257.3767117	10422.0209196	2601.10549064	4439.30523471	4175.00714128	3712.52208951	4684.91841475	1369.0192682	6854.67933956	5172.53355127	4947.20005602	5504.6749025	4679.88726152	5946.14042632	7858.19693942	4808.22552757	8628.55056227	4428.40434216	8073.15456977	4123.00221216	4999.72773222	7438.02305241	4980.65112818	7764.53440208	4644.46712193	6363.84077792	7213.35680634	6998.47948313	7629.78068894	9139.43417187	4202.83785501	2650.94115284	3247.96631296	4740.27280729	4103.6671683	5748.21855944	7779.3062674
AL121656	0	5643.87594309	0	760.028865896	7344.84362139	1750.79223349	566.081527062	0	0	0	1216.91549039	0	0	0	0	0	0	0	0	0	454.477282953	1151.32563634	0	0	0	588.230449867	0	0	0	0	0	0	2709.57642208	0	0	0	2019.48941922	0	864.543721921	605.792772226	0	0	0	611.912342333	0	0	0	0	0
AC020594	3340.51172186	6438.69397531	2801.90660405	5419.14073021	14401.7606807	7490.07564976	3229.00942063	7610.49487243	0	927.454508356	8676.82346699	5989.53329057	15426.6787955	14151.2680501	14795.21116	7267.96250977	10772.6181592	17283.2600628	11565.9885913	2212.22909181	7129.10814857	820.915616442	5073.30074019	4076.93377887	6932.14069704	2516.51251629	10837.2889438	8546.69200286	4601.21287972	14618.6007075	10250.108338	3053.62392636	9659.88043966	12141.914699	6810.13927586	2123.3191938	7679.63629243	9426.517602	38218.9712809	10366.5840076	7640.59044573	6586.00517806	7690.33017883	4363.04362433	5773.30816812	10872.135532	11670.9265549	10518.0595082	0
AC009499	0	0	0	0	0	0	0	0	0	0	0	0	0	0	0	0	0	0	0	0	0	0	0	0	0	0	0	0	0	0	0	0	0	0	0	0	0	0	0	0	0	0	0	0	0	0	0	0	0
AC073218	0	0	0	0	0	0	0	0	0	0	0	0	0	0	0	0	0	0	0	0	0	0	0	0	0	0	0	0	0	0	0	0	0	2666.6453335	0	0	0	0	0	0	0	0	0	0	0	0	0	0	0
RP11-529E15	0	0	0	0	0	462.654526612	0	0	0	0	0	0	0	0	0	0	443.609276047	0	0	0	0	0	0	0	0	0	0	0	0	0	0	0	0	0	0	0	0	0	0	0	0	0	0	0	0	0	540.676147964	0	0
AC012593	0	0	0	0	0	0	0	0	0	0	0	78.0320017042	0	0	0	0	0	61.4092790895	0	0	0	0	0	0	0	65.5705543099	0	0	0	0	89.0260206143	0	0	0	0	0	0	0	0	0	0	0	85.8772168774	0	0	0	0	0	400.33295692
AC019064	0	0	0	0	0	0	0	0	0	0	0	0	0	0	0	0	0	0	0	0	0	0	0	0	782.586357915	0	0	0	0	0	0	0	0	0	0	0	0	0	0	0	0	0	0	0	0	0	0	0	0
RP11-490M8	70953.9293052	99597.4479269	339831.972927	71064.7755429	58036.3053363	35738.1660557	41002.243941	62375.9070863	49065.3747053	93358.6857838	29648.184229	44250.541032	96876.1708839	235235.832833	93935.4424402	56572.0953825	132646.445821	20314.0552949	162353.614718	139944.645253	62844.522651	40180.0064288	109320.852015	60240.59529	69352.9740956	77466.414436	161243.330642	106553.430626	93482.5655015	10384.7983168	30501.3849206	150870.714373	68690.7235854	46097.9918718	83331.1714397	5882.63842216	42552.7388007	78348.2692494	218602.006015	62227.8280454	2646.02415026	149350.763446	83194.8443546	29010.6638365	144842.732338	198297.652306	373190.631703	41628.8537911	258946.513356
RP11-78I14	0	2276.44201219	0	0	925.788343492	882.72160726	1141.63722194	0	0	0	0	0	1454.45395617	2729.05777916	1307.73571446	734.181508758	846.384225429	0	0	0	916.560880265	0	1195.79891924	2162.13956683	4084.83883473	0	851.465286612	2014.4922573	0	0	0	1079.628543	0	0	0	0	678.79630409	0	0	0	0	1552.34989553	776.847459786	0	1360.79369653	6726.84954728	4126.33177358	1062.49375785	0
RP11-288C18	25014.2825803	23483.5253718	30024.7088884	16651.5415165	83163.9417376	17406.27206	18655.6080947	21370.7230919	7055.38990632	34485.153423	57019.7884992	15207.9542756	27086.8438071	13453.4834598	26264.6080467	45710.5109108	16844.274604	4564.17781712	3882.42581132	7140.31162176	22257.2350657	16639.6898786	18339.8465261	13948.4705338	4474.91129794	26749.8808168	31247.9304076	22252.5216153	25543.9373544	10307.844502	33524.9278056	16755.2741414	25192.4368563	31351.9264191	6374.42562853	50988.8583177	14624.4563544	22775.692807	24830.6995946	24202.5550872	19605.6441814	64811.2999163	17587.9689215	32896.4823183	28324.0527545	42285.2566926	41059.9958111	10281.5954398	32895.0440641
RP11-423P10	6432.73227532	8011.54348966	5146.52947624	5779.65679772	10472.630696	8210.26260636	11335.9202669	4988.44625118	3372.88740884	8325.38574974	10025.2333195	7718.82794034	5118.698856	4573.54586182	8136.29627657	5444.48774914	9999.93058559	2164.48735374	4111.8108271	2556.01752022	10598.6540285	6274.61875854	9994.96719584	6159.88995357	3080.54635235	5964.28244724	10381.0253692	6963.05567242	5861.5152944	3398.06548132	3745.22613359	5970.74612581	10989.3522835	5275.79266087	8019.77616275	6510.65609226	8019.89890491	8856.7694024	6245.72027769	5451.33848307	10355.8831061	16649.8336415	6346.7395676	8841.27251815	4190.44306602	4710.6393171	7260.95509566	7612.07071427	4324.1854337
AC007391	0	5397.51627891	1879.05641303	1453.7060054	2634.08826303	837.184381488	541.371619134	1913.94885929	0	0	0	0	1379.42260129	4313.78842076	1860.40973664	0	0	1053.70524914	0	0	434.638988856	550.534679281	0	0	0	562.553723881	0	3821.14007535	0	0	0	5119.66709877	1295.6506304	904.754666725	0	0	0	0	1653.61140463	579.34943693	640.505845897	981.512235532	0	585.201882946	0	911.404218708	1956.73272596	1007.68257193	0
AC006369	0	0	822.087180701	0	0	0	0	0	0	0	0	0	0	0	0	0	0	0	0	0	0	0	0	0	0	0	0	0	0	0	0	0	0	0	0	0	0	0	0	0	0	0	0	0	0	0	0	0	0
RP11-314C9	0	558.87995985	7134.04468676	752.612045942	454.573013034	216.713368398	0	165.148129615	0	0	150.630011908	519.892720137	0	0	0	180.24589686	0	0	401.572074357	576.065818976	112.510554896	142.511288319	0	530.818034383	0	0	0	0	532.514964336	195.21500688	395.427337582	1060.22073663	335.391842692	0	0	0	499.94550594	467.556379702	428.053491491	299.940540537	0	508.148091123	0	0	167.041445029	0	0	0	222.270121433
AC009229	605.087332255	0	3552.68543686	588.961275502	711.457923133	0	0	1033.9016346	824.893300052	1007.97306696	0	542.460410561	0	0	1004.98017928	0	0	0	0	0	352.183360745	0	459.479005945	1107.71994957	0	0	0	774.0573143	3333.78339409	611.066910605	2475.55313914	829.682385138	1574.77793663	3665.56553078	0	576.914700565	0	1463.55670624	669.951887405	0	0	4771.85369815	1790.99559057	0	0	0	0	0	0
AC016995	12133.9175779	65239.1198381	1088815.4124	10774.5268636	69332.5403893	7398.285507	6944.744526	77294.0885481	5513.90781675	1773.07479539	5639.93525354	3053.4875599	17302.0789628	20413.3933503	98467.0257443	5160.86413509	23111.8425539	300.37751446	7517.89258435	4017.79842409	1982.42579532	3766.55400485	5496.07580188	4481.62941134	5301.04876832	2565.85589897	8517.54245419	19062.4748103	12901.4400353	9889.05341981	6967.39390292	7005.37253695	36934.8369752	4642.49679668	1301.93839097	3247.42935522	10827.7224932	11070.2170998	209533.515699	25268.5485184	13694.0729496	78623.1271747	9241.32113927	4170.55640561	3495.11548413	178231.07477	63031.5849599	14937.4122427	142703.075288
AC093822	1980.86484559	5727.04885173	63967.0362078	2892.10984233	4658.17713883	0	0	4230.83432053	0	0	0	0	0	0	11514.9571068	923.523055753	0	698.772954692	0	0	0	0	752.094583415	0	0	0	0	0	2728.43851464	0	0	0	1718.44188874	1199.99040008	0	0	853.854298303	1197.8056201	10966.0545781	0	2548.53904999	16272.4396943	977.192330995	0	0	12088.0980587	1297.62275511	1336.50530593	10249.5772049
AC011247	3230.59502715	9340.25134616	8129.13675681	4716.74566561	9496.28386672	1810.90527155	3513.10681601	4140.04388447	0	5381.62444334	3776.0939895	7240.56599504	7459.53853057	1866.2226301	12072.7018103	3012.34988143	3472.71810949	9117.03769211	3355.62587456	1604.57818247	3760.65322547	0	1226.59202445	2957.08930742	0	0	3493.56572533	0	4449.81388653	9787.56098874	0	6644.58081831	5605.21817786	0	0	1540.08988735	2785.10414897	1953.50272807	14307.6420246	3759.55514437	4156.41561801	1061.54971397	0	0	8375.01356578	0	4232.58924414	0	0
AC074366	0	0	290.682760027	0	0	0	251.244287333	296.080486519	0	0	0	310.690953378	320.087012453	0	1151.19276521	646.296061116	0	1467.03714245	0	0	0	510.99351447	263.16385055	0	0	0	0	443.336693825	0	699.9698313	0	0	300.648212579	0	0	0	0	0	767.421867341	806.608055837	297.251331797	227.7542204	0	0	598.949711733	0	0	467.653790287	0
AC018693	684.298764841	0	0	0	804.594233071	767.165324127	0	584.624378837	0	0	0	613.473409762	1264.052711	0	0	0	0	0	1421.56514322	0	0	0	0	0	0	515.503776065	1480.00148	0	0	0	0	0	593.643561565	0	0	652.438079549	0	827.574792072	0	0	1173.87253212	1798.84424257	1350.3021301	0	0	0	0	0	0
RP11-173C1	3207.65046019	4121.73970389	4185.17110175	6591.2351836	10895.5469062	799.130545966	3875.72863698	9439.2477833	971.749304227	10093.0939489	2499.51676009	3514.69141009	4608.52550885	3705.93641601	53275.3697311	34229.8223505	2298.70261225	2011.61911199	0	708.080902492	2074.4133559	3415.8174419	2435.76086674	4241.01492054	4807.42206799	805.474650102	2312.5023125	7294.90378022	3436.38562923	1079.78300681	1822.67288417	27366.9477643	4328.65096974	12954.441819	10898.8024396	1359.24599906	2765.32357973	9051.59928829	15389.8606862	2212.06148646	0	3513.36766128	4571.33533628	1117.20359471	4927.72262835	13484.6396904	5603.37098799	2885.63645598	3278.48429114
AC019171	0	0	3713.89973399	0	15618.5939361	0	0	3782.86362777	0	0	0	0	0	0	3677.04512654	8257.38261615	0	0	0	0	0	0	0	0	0	0	9576.48016472	0	0	0	0	0	0	5364.66296505	0	4221.65816178	0	0	0	0	0	11639.5803931	4368.62453856	0	0	0	11602.2740457	0	0
RP11-449G16	789.023733045	0	1985.41809679	1535.99125099	927.729199558	2653.71653	7436.19884396	1348.19039145	6453.88217147	2628.75994821	3689.01425389	7073.59277503	2186.25468883	3646.37209905	1310.47729877	7357.20673346	4240.7930792	1670.02341373	8195.60617162	2351.36299695	5051.65315349	1163.39403923	4194.07042324	2166.67235418	9824.16585157	1783.18916249	7679.25296227	1009.35775575	3260.39822504	10358.673038	8070.19943682	0	6160.45205397	2867.90158509	24128.1664071	6018.29675055	2720.87742855	2862.68009836	0	9182.14201927	4060.56536267	5703.88242535	778.476070813	1854.97955349	2045.46977026	1925.9862735	11371.2015018	15970.8181211	9979.78865983
AC007246	14795.5117899	14608.6048072	14376.8303751	19020.4524072	16871.2942953	13457.5433286	13681.0173658	15168.4918942	18267.3300448	13625.5050854	26973.9671524	10311.0128061	22380.1648209	28833.8455937	16181.5077405	24884.8431756	12483.4453685	20562.0239271	17165.9104967	22184.644208	30741.5688566	12430.7643471	39004.9349298	15433.8040503	16684.0306585	17791.4187067	30792.1981264	14570.3285116	21532.8480906	21313.100097	16446.3984251	20516.9462799	21747.5563757	20225.9174094	26463.6698311	10380.3566283	25991.826437	12356.5350574	9643.49080829	21614.6070301	18628.5438545	22455.5322671	21924.1311585	21045.3910801	10180.0126572	20033.8572187	52082.0075098	25540.515281	20158.2282895
AC007317	0	0	0	0	0	0	0	0	0	0	0	0	0	0	0	0	0	0	0	0	798.025684457	0	0	0	711.312554827	0	0	0	0	0	0	0	0	0	0	0	591.01026112	0	0	0	0	0	0	0	0	0	0	0	0
AC104654	7124.93702813	6058.68197009	14061.5357412	4895.33069081	492.791568139	0	3949.96308304	31867.887911	5142.26357872	3141.77796706	2939.29810541	3005.88307678	5419.37966296	6294.86452846	8353.198283	8206.80844645	3604.20186864	9166.53163281	6965.35259486	416.332646454	2683.33914723	617.972112155	636.516573937	5370.8381519	0	4104.51224818	2266.14925947	4289.20845875	10391.1578174	6348.83549659	5144.07812654	15516.3540935	11634.8849483	3554.53726526	3204.10227623	2797.20112056	361.319190818	1520.59956227	14849.356756	7153.48168896	718.964245728	5784.14560182	6616.17970206	656.885855244	3621.71150859	4603.7077239	29651.6914643	6786.70845771	13493.6279956
AC013480	0	0	3431.32040641	0	0	0	0	0	0	6814.77443097	0	0	0	0	0	0	0	0	0	0	0	0	0	0	0	0	0	0	0	0	0	0	0	0	0	0	0	0	4529.45732572	0	0	0	0	0	0	0	0	0	0
AC083949	0	4596.15324954	4666.88562138	1547.344935	1869.17350872	891.110724963	3457.46098471	4074.46768777	2708.99489246	4303.31056992	2167.83150189	1781.46977492	8442.5907044	7805.81609061	5280.65614793	4446.95367923	2563.28401112	13458.9426542	3302.47446155	394.790619341	1156.58949516	292.998393197	5130.44457113	4365.37576745	0	3592.74014998	1719.1147075	8642.95886104	4379.33109002	1204.06637295	1219.47786632	6539.33402605	3447.77147688	1444.55021762	0	1515.69564415	685.24737773	0	20681.4925833	2775.00427235	0	1044.73530456	2352.69114537	934.345561789	5838.33663042	0	0	4290.3655016	913.959717911
AC016735	8457.62518342	83612.0071575	45767.5211873	4116.11138609	4972.21155268	21869.3558328	11076.2396364	49414.4273812	5764.98463632	1590.69037098	3933.03205068	489.17778234	21796.7769937	4412.91643303	59360.4892845	635.989056155	84756.2230295	1251.15563471	566.771169824	542.032209519	3652.29080016	2212.51486911	9426.39749709	3745.93226874	5378.54386328	1849.75983438	737.586819501	27746.5459477	110106.68511	137.76136948	2930.01767882	84358.1594939	49703.3935199	15370.6635515	0	520.247834363	5880.11296403	15672.6288096	15707.8099646	25717.3194055	1755.06494925	44017.5686578	6998.66635029	106.901685032	1527483.27945	123536.068453	5897.85768362	28163.9791542	42193.7006922
AC093609	8302.15413226	5715.01723649	663.19638107	4617.65437011	18593.5642096	2216.07630394	2866.08504248	6417.35793996	2155.81358249	1975.71191486	1848.38214192	3898.64929523	4381.69532174	9135.0813616	5909.5368105	3317.69837256	10624.2557709	17851.0065736	0	1178.15141759	1380.6179646	582.919072179	2101.44074778	2894.96558248	6563.20323697	1191.29023881	4275.21435925	12643.4781905	15791.6977055	6387.95997304	404.357681866	2168.32959477	6516.36052348	2873.92658842	0	376.933764445	5112.36292051	12431.0079061	8316.69265268	6441.00256352	339.091330181	14029.8513667	3120.44609897	619.625523119	1366.51131711	16405.2759367	12431.0079061	533.479008668	11819.073621
LINC01126	2515.19290844	31070.8057387	8438.63001527	2448.1610249	9409.7442203	4870.52104321	8619.84653358	2930.22547108	1558.57725587	2094.94280806	4454.3838576	2254.86885119	5702.06037616	1849.215741	3228.02564268	2558.48428568	6636.35164848	2581.12974758	950.013157682	1135.68261396	3859.46747334	5225.73136639	3298.98110101	5023.09945538	2846.97880389	2928.2869418	6428.92501945	10822.6944297	3149.47337656	5080.0969652	1169.34542265	4389.35249683	12496.81009	1939.23114472	3845.70137115	4578.16513899	6702.18562216	6360.15863895	6329.13235064	3015.71444448	3530.1755978	11871.1698572	3835.15337681	2508.61754925	7903.51624474	8930.21095949	2396.58151613	5553.88596144	8939.14793356
AC010883	5673.83397984	47845.3201809	24588.2557766	11045.243619	24461.2819602	16962.4493777	13025.564384	10502.6741424	16759.0131262	11814.5586869	12526.8913672	16107.5304824	20961.6781221	43701.494755	6282.3886584	9699.3124951	33544.8863616	12676.2329972	49111.8611038	13151.0905307	6604.76533819	15337.5088539	11489.2840883	7790.22145436	33360.2013779	7123.7959004	36814.1071659	42339.7681716	13025.2089895	9549.83965819	4836.03659719	5186.55722167	32814.4682272	3437.15843238	7229.35639209	10819.3249372	15489.5176727	10292.7015597	17799.1740136	11004.727998	16221.8565996	33558.8404551	15860.9609503	8151.65637952	30234.9212523	39240.7605321	42123.8341609	17864.8447928	25008.7394671
RP11-559M23	0	440.542219364	766.837596897	593.253300991	1791.60659186	2049.91544099	0	520.718070219	830.90466823	507.659309837	237.470958044	0	1688.81536287	352.08896584	506.151960738	0	327.588388466	215.007062982	633.085691314	302.726086247	177.374939582	0	0	278.94810066	632.405817975	0	329.554985425	779.698217805	0	307.760014896	0	0	264.375675191	369.227815408	0	1162.2378745	0	368.555575417	337.41706394	0	261.388620512	200.276180853	0	0	263.343881353	0	0	0	0
RP11-89K21	194.403058193	15316.0100361	133218.887927	283.83309403	76687.8878396	25281.5845451	2325.43718219	581.302649411	397.533806275	39832.6381512	0	1045.69331209	14364.2353523	7973.37834961	21390.8681496	181.270021274	6478.16190724	137.155848545	2221.19553629	0	50464.8194581	0	369.054676779	177.944681981	5950.44549674	73.2249681911	11247.1703381	18030.0178659	47395.3446525	1963.24183056	65616.2238301	1599.36707714	337.297478162	235.5353058	891.720199603	0	167.595368468	822.872662571	2475.29227821	33935.0341673	0	447.155884163	9877.92041196	0	0	5575.7601066	0	0	2235.33019851
SIX3-AS1	0	945.385996375	18650.1654757	0	24990.6549368	1099.75915275	3792.89377645	0	0	5174.72880336	0	586.290834699	302.010856233	2644.49097279	14391.9099001	0	1757.47897374	0	0	0	4187.0348466	0	496.604590265	0	1357.11761112	0	1060.81774196	3764.7027328	0	990.661038391	2341.12909814	448.360072594	1134.67926624	396.174067793	0	0	281.898030717	790.905535429	1810.20883565	507.371183689	0	0	322.617798243	0	0	1197.25732292	0	0	0
AC012354	0	202.633013376	940.577958702	0	988.886766903	1100.03221523	0	0	0	934.017501153	0	251.329888543	388.396084385	161.947811103	1396.86630505	0	150.678458009	0	0	0	815.858660646	0	106.441691507	0	0	105.596676661	0	358.63214115	0	1698.69773585	0	192.202027395	0	0	214.322818924	0	0	0	775.996413345	0	0	92.1195841169	0	109.847951212	0	0	0	189.151588921	644.707525409
AC093702	1025.51586012	4447.43575679	3440.67005329	998.185050033	0	58634.8428931	0	2628.42023183	1398.04804532	3416.67164931	799.11889151	1838.74863961	3788.71384768	1184.82254172	851.631705056	1912.472813	4409.5003788	2170.5753906	10652.0548879	36673.5743721	596.888420663	756.047624952	778.735535961	12203.0293082	9576.55404196	0	7762.95054224	2623.78010624	0	45568.6082001	1048.90603034	14061.6469634	11565.5353275	1242.49687201	4704.00628455	0	2652.29945522	3720.70410605	0	8751.80729793	0	2695.81562239	1011.80677324	0	0	0	10748.7007508	0	3537.54708254
AC009236	0	0	0	1324.89661252	0	5341.02440848	0	0	927.818503856	2267.48371663	0	610.145344248	13829.148104	786.310800746	0	0	4389.56592863	0	1413.85321659	1352.14002356	0	0	0	2491.86910897	0	0	1471.97253888	1741.27902168	0	4123.87289399	0	4666.02571027	590.42307208	0	1040.60898519	648.898632462	1173.47064505	0	0	0	0	0	0	0	0	0	0	0	0
U51244	0	0	0	0	0	0	1459.09783981	0	2743.76274135	838.180812365	0	0	0	0	2507.07622264	0	0	0	0	0	4685.73369804	0	1528.32054384	0	0	758.093788331	1088.23638235	0	0	0	1029.2740993	2759.69221153	0	1219.24158297	0	0	0	0	1114.19805873	0	2589.4247032	0	0	788.614302151	869.598110885	0	0	1357.94656752	0
AC017006	0	0	0	1006.4118499	0	2318.35674874	0	0	0	0	0	926.951580684	0	0	858.65064768	0	0	729.488249403	0	0	1203.61566145	0	0	0	0	0	1118.13298626	0	1424.18493896	0	0	0	0	0	0	985.826768549	0	0	0	0	886.854248165	679.508470753	1020.14584005	0	893.488168876	0	0	1395.2527919	0
AC016912	0	0	0	0	0	0	0	564.111242737	0	0	0	0	0	0	1644.9938724	0	0	465.848636461	0	0	0	486.788558522	0	0	0	0	0	0	0	0	0	905.372707992	0	0	0	0	0	0	0	0	0	0	0	0	0	0	0	0	0
RP11-417F21	0	1363.58305993	791.181647592	0	1109.08979496	1057.49606083	0	805.87320391	0	2356.98965282	0	0	871.214274497	3269.39753994	3916.65207714	0	0	0	0	937.009314575	0	0	716.280555633	3453.64315103	0	0	0	1206.67581327	0	1905.18104459	964.783240943	1293.38958285	0	0	0	1798.70147244	0	0	0	731.80981507	0	1239.80492909	0	2217.60713537	0	0	3707.49358604	1272.86219612	0
RP11-536C12	788.610415217	5985.05105249	14221.3761422	1918.98330729	4636.21611513	5083.62564181	571.715654361	2358.09728499	0	1149.4800245	3379.82500265	1590.72466125	3095.57172547	455.557750458	3110.75321077	1838.33819375	2755.07154364	139.095716492	1228.69695459	979.22136332	1032.75141616	581.392306668	1047.96835615	1443.69158435	2659.31781236	445.563766636	1492.40589262	4287.52333232	4073.36289509	1194.60540093	2621.44089616	1081.32518293	11972.3819383	716.599819847	0	2067.70580475	1699.65758698	4530.20250244	5457.17750086	917.733209679	169.101595774	12567.8811343	583.551208661	1545.00654272	4088.79656538	13234.2194566	3099.61223851	1064.16347041	3173.72392354
RP11-333I13	1680.88003544	3313.45700922	3588.74598737	1636.08325091	1976.36829479	342.623571474	1440.14082362	1436.04445471	416.633075625	1400.03080068	1786.09399016	1095.93300972	1552.48049158	3707.4410593	1776.5666669	1282.35844526	6406.12859539	107.809063249	2222.09736151	1062.55258449	444.697625626	2027.79155925	1856.57128184	2797.40888603	1109.85552099	690.687154289	1487.21220585	3518.61376001	5472.38581499	462.952032151	468.877604307	2095.25961655	5700.23151888	4443.32620735	1168.20294115	728.463142005	1712.56201121	2587.22123384	1691.88012166	1778.2711097	2490.24928149	4217.75294392	1959.9391454	838.242892015	12676.4314142	8205.96831265	5805.84764975	1237.20345007	4919.72307757
AC016722	3486.75392439	8005.38436222	2752.53604263	3593.46618012	7717.08910193	5288.6328884	3271.24169644	2102.73618546	1118.43843626	1366.66865973	2717.00423113	2574.24809546	3788.71384768	1421.78705007	3917.50584326	4972.42931381	5291.40045456	1736.46031248	1704.32878207	1833.6787186	4058.84126051	3326.60954979	4205.17189419	4130.25607353	3192.18468065	1390.59601718	5101.36749919	2361.40209561	4802.64654075	1864.17033546	2517.37447283	2249.86351414	8896.56563653	1242.49687201	940.80125691	3715.5193086	1768.19963681	3224.61022524	2043.80962708	3978.09422633	5981.31235711	9435.35467835	2630.69761042	3214.62396735	10279.7396301	2252.93162728	5911.78541294	3874.77287604	2830.03766603
RP11-15I20	0	0	0	0	1615.06141675	1539.93039515	995.807649794	3520.54826672	0	0	0	0	1268.66604206	0	2281.37836318	0	0	0	0	0	0	1012.66232977	0	0	4275.66342263	2069.54070683	0	0	0	1387.1664905	0	0	0	0	0	1309.63848085	0	1661.19027606	0	0	0	3610.81873509	0	0	0	1676.45155558	1799.62279906	1853.54750457	0
AC093732	1493.50920898	2159.00651156	0	726.853002702	4390.14710505	0	1624.1148574	637.982953095	0	3109.91690302	581.898081715	2008.39509148	0	0	3100.6828944	2088.92119754	802.721547133	526.852624569	0	0	434.638988856	1101.06935856	1134.11087975	0	0	562.553723881	807.54049008	0	1028.57801147	0	0	2047.86683951	5182.6025216	0	0	2135.95799852	0	903.107411983	4134.02851157	0	640.505845897	1472.2683533	0	585.201882946	645.297010855	0	3913.46545193	1007.68257193	4293.2532384
AC073283	2966.83586108	1378.5548334	8531.93182133	1959.55640593	8347.21213082	2257.00383928	2227.67105441	2082.06598882	866.695325392	3177.15834957	82.5666197028	1139.89991679	2935.93323923	2938.03968116	6159.46466861	3359.21111496	8314.67656592	1121.34173472	7263.90972677	3578.67915584	1541.79371047	624.931257562	50126.9345939	1357.83014088	1978.93881385	4390.19966947	1833.33516667	5015.2463489	1605.41568007	535.027615985	6827.63410124	4794.4990533	2022.26551096	2952.67908127	12474.7103599	202.050080941	4841.39233328	2050.29790829	1759.75537992	575.434913708	636.178103695	5361.84217856	3240.80114277	1826.77885082	3296.24689329	8276.53560773	1804.68930469	8435.93720689	4386.08033545
AC106869	3335.57743571	803.647918632	932.589298048	1623.34082731	1307.31706998	623.251001876	806.05995877	949.90667167	0	19910.8180568	0	996.781020293	8728.87211804	3853.73594811	923.334817594	10367.4670956	22111.0065154	0	8084.23308923	3865.68244551	323.571714008	3688.66367093	360938.744685	4070.91172012	576.825099852	5863.18918124	4809.45828065	7111.72303537	0	8982.77384688	48900.4019641	1524.55670179	1929.12235664	4714.88104018	32300.3799332	1060.09141433	2396.34145757	672.328117636	1846.57344446	0	4768.31530771	365.348719873	10421.4603099	5663.57863672	0	0	0	9752.34300041	5753.08617116
AC079807	0	0	0	0	0	0	0	0	0	0	0	0	0	0	649.789679326	0	0	0	0	0	0	0	0	0	0	0	0	0	0	0	800.308759119	0	678.802409273	0	1196.37581873	0	0	0	866.341110117	0	0	0	0	0	0	0	0	0	0
RP11-191L17	1356.26782221	5881.83395583	16495.0681879	5280.48884125	18338.9496367	8362.79317292	9340.85517987	4055.50244779	11093.700165	24852.4386455	2113.70546439	4255.62635601	6263.32424368	7051.29523479	7884.11477582	6323.22092227	4373.74767303	8611.90452269	4226.27475012	10778.1395752	4736.39027856	4499.50505444	12358.7434248	5586.50115105	7036.22689369	6130.31517483	3666.67033334	2602.50621348	2802.18009611	55471.6632254	3468.00462285	20456.5292941	2941.47710685	4929.69029221	0	8405.28336716	2923.104805	3280.47665326	11262.4344315	4208.89536883	6398.13407145	5347.91531576	4683.48036116	531.426574783	5273.99502926	2482.96068232	1776.92485385	8235.76242571	779.747615191
AC007682	0	0	0	0	0	0	0	0	0	0	0	0	0	0	0	0	0	0	0	0	0	0	0	0	0	0	0	0	0	0	0	0	0	0	0	0	0	0	0	0	0	0	0	0	0	0	0	0	0
AC087073	0	0	0	0	0	0	0	0	0	0	0	558.626449286	0	0	0	0	0	0	0	0	362.678891363	0	0	0	0	0	673.841733444	0	0	0	0	0	0	0	3810.97197888	0	0	0	0	0	0	0	0	0	0	2281.52844153	0	0	0
AC139712	0	0	0	0	692.530247557	0	0	1006.39564432	0	0	0	0	0	0	0	0	0	0	0	0	0	0	0	0	0	0	0	0	0	0	0	0	0	0	0	0	0	0	0	0	0	0	0	0	0	718.854031657	0	0	0
AC010967	0	1112.61685258	645.565393434	749.14910708	16289.331099	0	557.978110519	1972.65894699	0	3205.31312704	0	0	0	0	3834.95503995	1435.33235659	827.344907475	0	0	1529.10722501	0	0	0	0	0	0	0	984.588240275	0	0	787.215773285	7387.39694251	667.697257383	932.50787736	0	0	663.526857577	930.810093332	0	0	0	0	759.372363554	0	665.091397691	3757.44561332	0	0	2654.96887381
RP11-477N3	22622.9919524	8919.17444121	78920.3693473	60555.1960612	33249.9665989	33432.477923	21992.1126593	12299.4746367	9112.14101669	6852.01363551	35657.9513025	18898.6685658	17570.6780525	40394.0319006	12809.3785146	19176.9814856	16028.1122034	17412.0473956	34179.7083616	43413.4848413	12868.1641619	14783.2099125	39043.1614341	48004.2243717	25607.2519738	13169.2904541	38364.7924632	42095.1824695	20537.8363602	97617.1041782	17880.1221949	16920.0801166	20964.0520033	19934.2667554	63677.59327	4411.97881662	31914.5541005	29846.9597141	21063.2141212	9573.51200698	41013.3743291	34803.4584501	33988.1376327	24175.5531971	16439.2058175	26983.5412949	16167.1031785	20814.4268956	40201.7417996
AC092839	998.313847911	2886.31109238	0	0	0	1119.20670629	723.743490832	0	0	4989.06563116	3889.61051969	894.987733074	2766.16309436	0	4145.21002328	0	0	0	0	0	581.055836561	0	1516.1588419	1827.59100432	0	0	1079.57667639	1277.09190847	0	2016.35871828	0	0	0	0	6105.64210939	0	860.648894841	1207.33722981	0	774.514897116	1712.54613439	656.077144175	984.968397289	782.338856776	862.678232019	0	1307.94866563	2694.28125333	0
AC093110	0	0	0	0	0	0	0	0	0	0	0	0	0	0	0	0	0	0	0	0	0	0	0	0	0	0	0	0	0	0	0	0	0	0	0	0	0	0	0	0	0	0	0	0	0	0	0	4979.13741423	0
AC104781	0	0	0	0	0	1062.8234969	0	0	0	0	0	0	0	0	0	0	0	0	0	0	1103.56700445	0	0	0	0	714.173997068	0	0	0	0	0	0	0	0	1449.51327156	0	0	0	0	0	0	0	0	0	0	0	0	0	0
AC012358	19159.411024	16693.9080894	15850.1160195	9707.59324111	48758.1860906	18831.3942882	12177.4637007	13677.9274128	14669.7551868	16613.9828526	9407.75810772	9176.43280292	28846.6701307	13948.5175379	8500.28214398	8810.17810509	24827.2706126	19257.6758504	6542.76844161	16425.1067925	9776.64938949	15479.4688065	9964.99099364	18258.0674532	23419.7426524	7315.55219172	23557.2062629	20144.922573	15183.3607718	14312.7722409	8053.3161744	14754.923421	16165.8166521	12719.5635155	21669.9201644	12011.4123432	12897.1297777	20949.0690043	13367.2687604	9773.79468495	25663.1128883	12591.2824859	22787.5254871	11106.5930587	11793.5453699	16336.6346148	10315.8294339	12041.5959223	15994.6137384
RP11-554J4	8903.24199416	39781.4361098	25797.6261092	24422.2608908	38066.8239302	17240.5970691	9975.20867256	15904.2976178	24274.9245546	17527.892945	12614.0487391	13786.660499	23921.8577565	37404.7202419	15459.4047793	12075.3122129	23491.2576632	19986.4092417	13451.3690972	22512.4044353	12248.4071182	19094.6737794	20896.907565	21485.0026347	31072.8858628	11584.9773331	16630.124157	27955.9538416	4459.38337876	56399.5046652	4139.23132405	4439.24682629	11234.544821	17651.4716915	11137.8729447	20064.2248119	9071.05426584	16640.4823782	16130.7125406	8163.22045326	12496.0624387	18617.0707901	15172.7497415	10148.5332991	13288.9552171	22720.4251683	21208.457933	15290.7703818	24197.3292198
RP11-481J13	1180.75080992	0	247.593315599	0	0	1985.60436833	428.00203301	0	402.418535398	0	1840.16711018	0	272.638820019	341.0430375	0	1100.98434882	0	208.261743359	613.224179429	0	343.62047119	435.246240561	448.307359526	540.393575396	918.848453176	222.37417791	2872.94404941	1510.47419449	1219.77251243	0	905.76120738	0	2304.73382725	1072.93259301	0	2532.99489707	0	713.986095121	0	229.013424481	9114.77495526	9311.6643145	291.241635904	462.653723929	765.246337579	1801.36363227	15082.9562594	398.330993139	339.419550142
AC011306	0	0	0	0	0	0	0	0	0	0	0	0	0	0	0	0	0	0	0	0	0	0	0	0	0	0	0	0	0	0	0	0	0	0	0	0	0	0	0	0	0	0	0	0	0	0	0	0	0
RP11-482H16	0	0	0	0	0	0	0	0	0	0	0	0	0	0	0	0	0	0	0	0	0	0	0	0	0	0	0	0	0	0	0	0	0	0	0	0	0	0	0	0	0	0	0	0	0	0	0	0	0
AC007743	6081.8365849	2637.5581838	1445.35015233	5919.7508219	715.09856427	12727.5475266	2057.59124407	5109.36199657	967.300142317	1688.55170388	31278.6282631	3816.65385551	936.209252692	4801.51488966	841.769016309	3875.16542112	5121.16025007	6078.74129721	0	1006.91278351	3775.84573782	2017.68810009	2463.0945689	4175.20621981	3050.0423338	3665.31098522	13373.0271086	6353.81600464	12565.6608134	716.559474488	7049.95930333	694.939999402	12574.755216	8596.75320281	1084.8902186	18942.3175263	2359.42502036	4780.89935091	1907.91038444	4875.70999332	77639.0377254	41301.231263	7000.62375558	15330.9338965	14452.7065507	16948.7310782	51394.6680223	3966.68151665	29954.026688
RP11-334G22	0	0	1867.93773603	0	2618.50194195	0	807.252355159	1902.62371811	0	5564.72705014	0	998.255548429	2056.89050606	1286.47891365	924.700697502	2076.56071708	1196.95757324	1571.20546025	0	0	0	0	845.550123366	0	5776.7839142	0	1204.14321598	0	1533.73762657	7871.55422714	1138.90092644	0	0	0	3405.06963793	1061.6595969	0	0	4931.48016528	0	0	0	0	0	0	0	0	0	0
AC007250	0	0	0	0	0	0	0	0	0	0	0	0	0	0	0	0	0	0	0	0	0	341.290871288	0	0	0	0	0	0	0	0	0	0	0	0	0	0	0	559.859945436	0	0	0	0	0	0	0	0	0	0	0
AC007131	0	0	0	0	0	0	0	131.942309545	0	0	0	0	0	0	384.754414143	0	0	0	0	0	0	0	0	0	0	0	0	0	0	0	0	0	0	0	0	0	0	0	341.986109123	119.816215106	0	0	0	0	0	0	202.337565426	0	177.578960374
RP11-444A22	0	1138.2210061	0	766.388940088	2777.36503047	0	0	1345.36990946	0	0	0	0	0	0	653.867857229	0	0	0	0	0	0	0	0	0	816.967766945	0	0	0	0	0	805.33161744	0	0	953.967263659	0	0	1357.59260818	952.230409288	871.778397418	0	0	0	0	0	680.396848266	0	0	0	0
AC007179	0	0	0	0	0	0	0	0	0	0	0	0	0	0	0	0	0	0	0	0	0	0	0	0	0	0	0	0	0	0	0	0	0	0	0	0	0	0	0	0	0	0	0	0	0	0	0	0	0
AC007381	0	542.712858767	629.78848357	1461.68144982	662.134905021	0	136.085434436	641.483108948	0	1563.48939563	0	168.284476493	5201.21439687	433.74550904	623.53882445	1225.22260763	605.34412931	1589.22926354	0	0	0	0	0	171.820899908	4479.67263331	565.640053538	0	1680.92047205	258.555270714	189.567889474	0	0	162.844867262	0	0	178.973039278	0	0	831.341793448	0	161.004960764	0	0	0	0	0	0	0	0
AC009970	0	2518.84093016	730.744160623	0	7170.57360491	976.715111736	0	744.313445278	0	1451.29455474	0	0	1609.32636817	0	2170.47802608	812.358243487	936.508471656	0	0	0	507.078820332	0	0	0	4519.79852546	0	0	5572.49594322	1200.00768005	879.823190732	0	0	1511.59240213	0	0	0	751.075540174	0	2893.8199581	675.907676419	0	4580.39043248	0	0	752.846512664	1063.30492183	0	0	3005.27726688
AC010733	58190.9922221	32562.771526	16531.9476937	42023.3416824	29796.0707259	75759.9671707	41506.0575029	25659.3243579	11515.5927523	22670.5962367	76793.1333774	39546.8519759	47677.798638	24940.3667698	12470.776489	51634.3813217	38338.4615229	23838.4389531	7799.11051145	8391.02356269	57359.3398759	20758.3150891	54878.5224706	48109.8519741	13633.7862753	84846.0080307	57852.9256833	46825.6417214	28441.0797785	38861.4173422	45118.6536594	25738.7752397	35825.8707977	22742.960201	4305.16285893	85012.1936569	29938.1332522	23836.6305447	40527.9124306	18932.1571609	60376.8602865	47494.4224894	22224.4240865	37511.2947612	36497.0977711	13746.0666203	28282.3513209	27863.3026373	29138.4489118
RP11-373L24	0	0	0	0	0	0	0	0	0	0	0	0	0	0	0	0	0	0	0	0	0	0	0	0	0	0	0	0	0	0	0	0	0	0	0	0	0	0	0	0	0	0	0	0	0	0	0	0	0
RP11-493E12	2980.26045773	6770.09734169	4285.26892384	1657.61951748	1001.19191898	7636.93987819	10494.2806171	4001.10576014	1741.23404739	1418.45983631	2985.84807541	1145.05783496	16515.6208281	3443.22297476	1414.24812559	793.979097706	4118.94223733	1201.51005784	0	8881.44914799	6442.8838348	1569.39750202	7759.16583794	4286.77595867	2208.77032013	7376.83570953	7366.52320363	2723.21068719	4105.00364759	3009.71191038	1306.3863568	3502.68626848	5909.57391603	1547.49893223	0	5683.00137163	734.082880894	2574.46909298	942.782972774	1321.23129508	2191.05167194	11751.4994354	4200.60051785	4003.73414938	1471.62757227	5715.86537162	4462.4130945	3447.09513293	489.547428089
[truncated: 8,235 more rows]
[truncated: 1,166 more columns]
