# Supplementary material for: Identification of Potential Prognostic Biomarkers for Breast Cancer Based on lncRNA-TF-Associated ceRNA Network and Functional Module
Source: Biomed Res Int. 2020 Jul 28;2020:5257896. doi: 10.1155/2020/5257896 (PMC7411464; doi:10.1155/2020/5257896)
Supplement: Supplementary 3 — Supplementary Table S3: raw data for miRNA-mRNA interactions from StarBase. [file 5257896.f3.csv]

name	geneName
hsa-miR-200b-3p	DEK
hsa-miR-200b-3p	PELO
hsa-miR-200b-3p	FBN2
hsa-miR-200b-3p	MAN2A1
hsa-miR-200b-3p	RNF160
hsa-miR-200b-3p	SEC24A
hsa-miR-200b-3p	RSRC2
hsa-miR-200b-3p	RCCD1
hsa-miR-200b-3p	ICK
hsa-miR-200b-3p	ASXL1
hsa-miR-200b-3p	GIGYF1
hsa-miR-200b-3p	TRIM52
hsa-miR-200b-3p	NPTX1
hsa-miR-200b-3p	UBLCP1
hsa-miR-200b-3p	DPY19L1
hsa-miR-200b-3p	LYPLA2
hsa-miR-200b-3p	EIF2S1
hsa-miR-200b-3p	HERC2
hsa-miR-200b-3p	IFT88
hsa-miR-200b-3p	MTF2
hsa-miR-200b-3p	BTBD1
hsa-miR-200b-3p	CASC4
hsa-miR-200b-3p	C15orf61
hsa-miR-200b-3p	SUPT3H
hsa-miR-200b-3p	WDR17
hsa-miR-200b-3p	GMFB
hsa-miR-200b-3p	CPT1A
hsa-miR-200b-3p	PKD1
hsa-miR-200b-3p	C10orf6
hsa-miR-200b-3p	CASP3
hsa-miR-200b-3p	PPM1D
hsa-miR-200b-3p	CUX1
hsa-miR-200b-3p	DDIT4
hsa-miR-200b-3p	RECK
hsa-miR-200b-3p	IL6ST
hsa-miR-200b-3p	LIG4
hsa-miR-200b-3p	STK10
hsa-miR-200b-3p	FAM105B
hsa-miR-200b-3p	SWAP70
hsa-miR-200b-3p	CBL
hsa-miR-200b-3p	IFNGR2
hsa-miR-200b-3p	PTBP1
hsa-miR-200b-3p	FLJ20232
hsa-miR-200b-3p	TRIO
hsa-miR-200b-3p	DDX3Y
hsa-miR-200b-3p	NACC2
hsa-miR-200b-3p	HMGB2
hsa-miR-200b-3p	PAPOLA
hsa-miR-200b-3p	FKBP9L
hsa-miR-200b-3p	CEP97
hsa-miR-200b-3p	MREG
hsa-miR-200b-3p	ZEB2
hsa-miR-200b-3p	GALNT2
hsa-miR-200b-3p	STK17A
hsa-miR-200b-3p	TTF2
hsa-miR-200b-3p	GATAD1
hsa-miR-200b-3p	PPP1R12A
hsa-miR-200b-3p	R3HDM2
hsa-miR-200b-3p	ARIH1
hsa-miR-200b-3p	PPARA
hsa-miR-200b-3p	ORC2L
hsa-miR-200b-3p	RPL36A-HNRNPH2
hsa-miR-200b-3p	FAM127A
hsa-miR-200b-3p	RICTOR
hsa-miR-200b-3p	MPDZ
hsa-miR-200b-3p	RFXDC2
hsa-miR-200b-3p	DOT1L
hsa-miR-200b-3p	FAM133A
hsa-miR-200b-3p	KIAA1432
hsa-miR-200b-3p	BTF3L4
hsa-miR-200b-3p	LHFPL2
hsa-miR-200b-3p	MEX3C
hsa-miR-200b-3p	PLXNA2
hsa-miR-200b-3p	L3MBTL3
hsa-miR-200b-3p	ZC3H11A
hsa-miR-200b-3p	EXOSC3
hsa-miR-200b-3p	SERINC3
hsa-miR-200b-3p	PDS5B
hsa-miR-200b-3p	UBE1L2
hsa-miR-200b-3p	PPM1B
hsa-miR-200b-3p	ZNF267
hsa-miR-200b-3p	HNRNPD
hsa-miR-200b-3p	EIF4A1
hsa-miR-200b-3p	COPA
hsa-miR-200b-3p	CSF1
hsa-miR-200b-3p	TMEM192
hsa-miR-200b-3p	LYPD6
hsa-miR-200b-3p	TRAF6
hsa-miR-200b-3p	MS4A1
hsa-miR-200b-3p	LCOR
hsa-miR-200b-3p	DLEU1
hsa-miR-200b-3p	TAX1BP1
hsa-miR-200b-3p	ANKRD52
hsa-miR-200b-3p	ENOPH1
hsa-miR-200b-3p	TPP2
hsa-miR-200b-3p	TIMP2
hsa-miR-200b-3p	TARDBP
hsa-miR-200b-3p	ACVR2A
hsa-miR-200b-3p	ZFP36L2
hsa-miR-200b-3p	ABHD10
hsa-miR-200b-3p	COL4A3
hsa-miR-200b-3p	CDC73
hsa-miR-200b-3p	SACM1L
hsa-miR-200b-3p	RBFOX2
hsa-miR-200b-3p	TMEM188
hsa-miR-200b-3p	TUBD1
hsa-miR-200b-3p	RAD51AP1
hsa-miR-200b-3p	TMEM57
hsa-miR-200b-3p	MARK1
hsa-miR-200b-3p	MATR3
hsa-miR-200b-3p	TRIM23
hsa-miR-200b-3p	MAP3K5
hsa-miR-200b-3p	WRNIP1
hsa-miR-200b-3p	ZNF302
hsa-miR-200b-3p	LOC100129196
hsa-miR-200b-3p	FBXL17
hsa-miR-200b-3p	NHSL1
hsa-miR-200b-3p	GAB1
hsa-miR-200b-3p	EIF2B1
hsa-miR-200b-3p	HNRPH1
hsa-miR-200b-3p	C11orf61
hsa-miR-200b-3p	SON
hsa-miR-200b-3p	BICD2
hsa-miR-200b-3p	CMTM1
hsa-miR-200b-3p	FAM149B1
hsa-miR-200b-3p	C1orf25
hsa-miR-200b-3p	KCTD2
hsa-miR-200b-3p	ANKRD28
hsa-miR-200b-3p	IMMP2L
hsa-miR-200b-3p	C10orf56
hsa-miR-200b-3p	PLCG1
hsa-miR-200b-3p	PRKAB2
hsa-miR-200b-3p	TMEM161B
hsa-miR-200b-3p	BHLHB5
hsa-miR-200b-3p	MCFD2
hsa-miR-200b-3p	ADAMTS1
hsa-miR-200b-3p	TMEM49
hsa-miR-200b-3p	USP42
hsa-miR-200b-3p	UBE2B
hsa-miR-200b-3p	PNRC2
hsa-miR-200b-3p	CTSC
hsa-miR-200b-3p	LASS6
hsa-miR-200b-3p	SESN1
hsa-miR-200b-3p	CITED2
hsa-miR-200b-3p	FXR2
hsa-miR-200b-3p	SCML1
hsa-miR-200b-3p	SH3BGRL
hsa-miR-200b-3p	RLF
hsa-miR-200b-3p	FOXK1
hsa-miR-200b-3p	SGEF
hsa-miR-200b-3p	C9orf41
hsa-miR-200b-3p	NPTN
hsa-miR-200b-3p	C14orf129
hsa-miR-200b-3p	LRIG1
hsa-miR-200b-3p	IKBIP
hsa-miR-200b-3p	KIAA0256
hsa-miR-200b-3p	DCBLD2
hsa-miR-200b-3p	ARID1B
hsa-miR-200b-3p	ELOVL6
hsa-miR-200b-3p	STK17B
hsa-miR-200b-3p	KCTD12
hsa-miR-200b-3p	ZNF260
hsa-miR-200b-3p	SPIN1
hsa-miR-200b-3p	ARL5A
hsa-miR-200b-3p	N4BP2
hsa-miR-200b-3p	ADCY7
hsa-miR-200b-3p	STRN
hsa-miR-200b-3p	STK4
hsa-miR-200b-3p	PPP3CB
hsa-miR-200b-3p	ITGB3
hsa-miR-200b-3p	ING2
hsa-miR-200b-3p	STIM2
hsa-miR-200b-3p	UBQLN1
hsa-miR-200b-3p	C1orf124
hsa-miR-200b-3p	NRAS
hsa-miR-200b-3p	XIAP
hsa-miR-200b-3p	PLDN
hsa-miR-200b-3p	PTPN14
hsa-miR-200b-3p	TMTC3
hsa-miR-200b-3p	DNAJB9
hsa-miR-200b-3p	FBXW11
hsa-miR-200b-3p	MGEA5
hsa-miR-200b-3p	CHORDC1
hsa-miR-200b-3p	CDC42SE1
hsa-miR-200b-3p	SYDE2
hsa-miR-200b-3p	YME1L1
hsa-miR-200b-3p	PIGP
hsa-miR-200b-3p	PPP2R1B
hsa-miR-200b-3p	C9orf16
hsa-miR-200b-3p	FUNDC1
hsa-miR-200b-3p	ACPL2
hsa-miR-200b-3p	TSPAN13
hsa-miR-200b-3p	ACY1L2
hsa-miR-200b-3p	EID1
hsa-miR-200b-3p	KDM4A
hsa-miR-200b-3p	NCAPG2
hsa-miR-200b-3p	OTUD6B
hsa-miR-200b-3p	NFIB
hsa-miR-200b-3p	TNPO1
hsa-miR-200b-3p	HNRNPH1
hsa-miR-200b-3p	SOS2
hsa-miR-200b-3p	FGF9
hsa-miR-200b-3p	SLTM
hsa-miR-200b-3p	SLC25A30
hsa-miR-200b-3p	SUZ12
hsa-miR-200b-3p	GSTCD
hsa-miR-200b-3p	BUB1B
hsa-miR-200b-3p	CNIH4
hsa-miR-200b-3p	ARL6IP6
hsa-miR-200b-3p	TBP
hsa-miR-200b-3p	MYLK
hsa-miR-200b-3p	FAM179B
hsa-miR-200b-3p	TMX1
hsa-miR-200b-3p	BAGE
hsa-miR-200b-3p	KIF23
hsa-miR-200b-3p	SSR3
hsa-miR-200b-3p	NOG
hsa-miR-200b-3p	EID2B
hsa-miR-200b-3p	HNRPLL
hsa-miR-200b-3p	LCLAT1
hsa-miR-200b-3p	SERPINE2
hsa-miR-200b-3p	MBTPS2
hsa-miR-200b-3p	GTF2H2B
hsa-miR-200b-3p	CCNL1
hsa-miR-200b-3p	ZNF529
hsa-miR-200b-3p	CRKL
hsa-miR-200b-3p	TMEM185B
hsa-miR-200b-3p	TMEM56
hsa-miR-200b-3p	REV1L
hsa-miR-200b-3p	ZBTB44
hsa-miR-200b-3p	RNF170
hsa-miR-200b-3p	GALNT3
hsa-miR-200b-3p	ITFG1
hsa-miR-200b-3p	PARP8
hsa-miR-200b-3p	FEZ2
hsa-miR-200b-3p	AKTIP
hsa-miR-200b-3p	TOB1
hsa-miR-200b-3p	USP6NL
hsa-miR-200b-3p	PPP4R2
hsa-miR-200b-3p	TRIM4
hsa-miR-200b-3p	11-Sep
hsa-miR-200b-3p	ARID2
hsa-miR-200b-3p	FLJ40432
hsa-miR-200b-3p	HIPK1
hsa-miR-200b-3p	TMEM129
hsa-miR-200b-3p	ENPP2
hsa-miR-200b-3p	RUNX1
hsa-miR-200b-3p	AMOTL2
hsa-miR-200b-3p	ZDHHC23
hsa-miR-200b-3p	ZNF548
hsa-miR-200b-3p	OAZ2
hsa-miR-200b-3p	TGFBR3
hsa-miR-200b-3p	DHX36
hsa-miR-200b-3p	CHMP2B
hsa-miR-200b-3p	CBX5
hsa-miR-200b-3p	VEZF1
hsa-miR-200b-3p	C4orf27
hsa-miR-200b-3p	LY75
hsa-miR-200b-3p	SNX30
hsa-miR-200b-3p	SLC39A14
hsa-miR-200b-3p	HOXA5
hsa-miR-200b-3p	UBE2D1
hsa-miR-200b-3p	FOXF1
hsa-miR-200b-3p	FBXW7
hsa-miR-200b-3p	SNORD45A
hsa-miR-200b-3p	KIDINS220
hsa-miR-200b-3p	KLF3
hsa-miR-200b-3p	HMG20A
hsa-miR-200b-3p	PPTC7
hsa-miR-200b-3p	ALDH1A1
hsa-miR-200b-3p	ITM2B
hsa-miR-200b-3p	BASP1
hsa-miR-200b-3p	GPATCH8
hsa-miR-200b-3p	ZFX
hsa-miR-200b-3p	RTN4
hsa-miR-200b-3p	SEMA6D
hsa-miR-200b-3p	UHRF1BP1
hsa-miR-200b-3p	SIX1
hsa-miR-200b-3p	ARHGAP18
hsa-miR-200b-3p	TMEM14A
hsa-miR-200b-3p	DCAF7
hsa-miR-200b-3p	CCDC43
hsa-miR-200b-3p	PPP1R9A
hsa-miR-200b-3p	ING3
hsa-miR-200b-3p	SGMS1
hsa-miR-200b-3p	RPS6KA2
hsa-miR-200b-3p	PPP1R2
hsa-miR-200b-3p	TMEM167B
hsa-miR-200b-3p	OTUD4
hsa-miR-200b-3p	KIAA0553
hsa-miR-200b-3p	ZMAT3
hsa-miR-200b-3p	CKAP4
hsa-miR-200b-3p	ANKRD40
hsa-miR-200b-3p	RAB27A
hsa-miR-200b-3p	SCD
hsa-miR-200b-3p	FUT4
hsa-miR-200b-3p	NUP160
hsa-miR-200b-3p	PFKP
hsa-miR-200b-3p	KIAA1033
hsa-miR-200b-3p	TMEM170A
hsa-miR-200b-3p	SEMA3F
hsa-miR-200b-3p	SMARCA1
hsa-miR-200b-3p	ZNF532
hsa-miR-200b-3p	KIF11
hsa-miR-200b-3p	DDX3X
hsa-miR-200b-3p	MCM3APAS
hsa-miR-200b-3p	ARSJ
hsa-miR-200b-3p	TBK1
hsa-miR-200b-3p	NIPBL
hsa-miR-200b-3p	FRYL
hsa-miR-200b-3p	ANLN
hsa-miR-200b-3p	CHURC1
hsa-miR-200b-3p	KLHL3
hsa-miR-200b-3p	C1orf55
hsa-miR-200b-3p	NAPB
hsa-miR-200b-3p	C17orf48
hsa-miR-200b-3p	ERP29
hsa-miR-200b-3p	PCDH7
hsa-miR-200b-3p	PGAM1
hsa-miR-200b-3p	TMEM165
hsa-miR-200b-3p	NFKB1
hsa-miR-200b-3p	KIAA1370
hsa-miR-200b-3p	HNRNPH2
hsa-miR-200b-3p	CHMP5
hsa-miR-200b-3p	DTNA
hsa-miR-200b-3p	SERINC1
hsa-miR-200b-3p	TRAPPC6B
hsa-miR-200b-3p	EIF4EBP2
hsa-miR-200b-3p	SERAC1
hsa-miR-200b-3p	GRB10
hsa-miR-200b-3p	FRMD6
hsa-miR-200b-3p	PPPDE2
hsa-miR-200b-3p	SMC4
hsa-miR-200b-3p	ZNF200
hsa-miR-200b-3p	VPS29
hsa-miR-200b-3p	VTI1B
hsa-miR-200b-3p	YES1
hsa-miR-200b-3p	ZNF362
hsa-miR-200b-3p	LIN7C
hsa-miR-200b-3p	DDX1
hsa-miR-200b-3p	SFRS11
hsa-miR-200b-3p	ZMYM2
hsa-miR-200b-3p	CALU
hsa-miR-200b-3p	FXR1
hsa-miR-200b-3p	ACER3
hsa-miR-200b-3p	ERI1
hsa-miR-200b-3p	LIN7B
hsa-miR-200b-3p	USP14
hsa-miR-200b-3p	PLCL2
hsa-miR-200b-3p	ARPC5
hsa-miR-200b-3p	PDCD10
hsa-miR-200b-3p	GCNT2
hsa-miR-200b-3p	FAM80B
hsa-miR-200b-3p	NUP62CL
hsa-miR-200b-3p	HIVEP2
hsa-miR-200b-3p	ZNF148
hsa-miR-200b-3p	SFRS2IP
hsa-miR-200b-3p	KIAA0152
hsa-miR-200b-3p	ATP2A2
hsa-miR-200b-3p	PLCB4
hsa-miR-200b-3p	KLHL22
hsa-miR-200b-3p	NCEH1
hsa-miR-200b-3p	C1orf22
hsa-miR-200b-3p	PLS1
hsa-miR-200b-3p	SNX25
hsa-miR-200b-3p	COIL
hsa-miR-200b-3p	LSM14A
hsa-miR-200b-3p	TJAP1
hsa-miR-200b-3p	PMAIP1
hsa-miR-200b-3p	RAD18
hsa-miR-200b-3p	GGA3
hsa-miR-200b-3p	SH3GL1
hsa-miR-200b-3p	TMEM126B
hsa-miR-200b-3p	OSGEPL1
hsa-miR-200b-3p	CDK14
hsa-miR-200b-3p	NNT
hsa-miR-200b-3p	ENPP4
hsa-miR-200b-3p	ASB13
hsa-miR-200b-3p	NBR1
hsa-miR-200b-3p	CCDC109A
hsa-miR-200b-3p	GPR137C
hsa-miR-200b-3p	PPP2R5E
hsa-miR-200b-3p	SLK
hsa-miR-200b-3p	THOC7
hsa-miR-200b-3p	PSEN1
hsa-miR-200b-3p	SYVN1
hsa-miR-200b-3p	UBE2A
hsa-miR-200b-3p	TMEM25
hsa-miR-200b-3p	KBTBD2
hsa-miR-200b-3p	SC5DL
hsa-miR-200b-3p	SMYD2
hsa-miR-200b-3p	IRS2
hsa-miR-200b-3p	KIF13A
hsa-miR-200b-3p	HNRNPU
hsa-miR-200b-3p	NDNL2
hsa-miR-200b-3p	CHCHD8
hsa-miR-200b-3p	RNF220
hsa-miR-200b-3p	IKBKB
hsa-miR-200b-3p	CSS3
hsa-miR-200b-3p	HCFC2
hsa-miR-200b-3p	ZNF292
hsa-miR-200b-3p	GFI1
hsa-miR-200b-3p	RECQL
hsa-miR-200b-3p	RPRD2
hsa-miR-200b-3p	P4HB
hsa-miR-200b-3p	FAM126B
hsa-miR-200b-3p	DECR1
hsa-miR-200b-3p	COX17
hsa-miR-200b-3p	SLC12A2
hsa-miR-200b-3p	PSD3
hsa-miR-200b-3p	NEDD4L
hsa-miR-200b-3p	PSIP1
hsa-miR-200b-3p	PBX3
hsa-miR-200b-3p	NAB1
hsa-miR-200b-3p	STARD13
hsa-miR-200b-3p	ITGA1
hsa-miR-200b-3p	PTCH1
hsa-miR-200b-3p	POLR2G
hsa-miR-200b-3p	SPRY4
hsa-miR-200b-3p	MBNL1
hsa-miR-200b-3p	EIF1AX
hsa-miR-200b-3p	GSN
hsa-miR-200b-3p	ZNF605
hsa-miR-200b-3p	SRSF2
hsa-miR-200b-3p	RPS6KA3
hsa-miR-200b-3p	REV3L
hsa-miR-200b-3p	UGCG
hsa-miR-200b-3p	DYRK4
hsa-miR-200b-3p	CS
hsa-miR-200b-3p	AHR
hsa-miR-200b-3p	IREB2
hsa-miR-200b-3p	MGC4268
hsa-miR-200b-3p	IDS
hsa-miR-200b-3p	HS3ST1
hsa-miR-200b-3p	CFL2
hsa-miR-200b-3p	RFX7
hsa-miR-200b-3p	SYNJ2BP
hsa-miR-200b-3p	TAF4
hsa-miR-200b-3p	C9orf40
hsa-miR-200b-3p	INTS2
hsa-miR-200b-3p	SRP9
hsa-miR-200b-3p	RPS6KB1
hsa-miR-200b-3p	WWC2
hsa-miR-200b-3p	KATNAL1
hsa-miR-200b-3p	AMFR
hsa-miR-200b-3p	TERF2IP
hsa-miR-200b-3p	HCCS
hsa-miR-200b-3p	SLC35B4
hsa-miR-200b-3p	PPFIA1
hsa-miR-200b-3p	LHFP
hsa-miR-200b-3p	DR1
hsa-miR-200b-3p	PPP2CA
hsa-miR-200b-3p	SP4
hsa-miR-200b-3p	PTPN2
hsa-miR-200b-3p	CAMSAP1L1
hsa-miR-200b-3p	FAM165B
hsa-miR-200b-3p	FAM83D
hsa-miR-200b-3p	EIF2S2
hsa-miR-200b-3p	TGIF1
hsa-miR-200b-3p	FADS1
hsa-miR-200b-3p	TTF1
hsa-miR-200b-3p	MDFIC
hsa-miR-200b-3p	BAP1
hsa-miR-200b-3p	STAG2
hsa-miR-200b-3p	STX17
hsa-miR-200b-3p	AKT1
hsa-miR-200b-3p	STAT5A
hsa-miR-200b-3p	LOC201725
hsa-miR-200b-3p	FAM178A
hsa-miR-200b-3p	WWC1
hsa-miR-200b-3p	PITX2
hsa-miR-200b-3p	OAT
hsa-miR-200b-3p	ZNF662
hsa-miR-200b-3p	GTF2E1
hsa-miR-200b-3p	EVI5
hsa-miR-200b-3p	ARMC9
hsa-miR-200b-3p	GLG1
hsa-miR-200b-3p	ZNF423
hsa-miR-200b-3p	MKRN1
hsa-miR-200b-3p	LMO7
hsa-miR-200b-3p	RNF4
hsa-miR-200b-3p	C16orf72
hsa-miR-200b-3p	EN2
hsa-miR-200b-3p	MAP1B
hsa-miR-200b-3p	PRDM13
hsa-miR-200b-3p	NPNT
hsa-miR-200b-3p	ZCCHC14
hsa-miR-200b-3p	AFTPH
hsa-miR-200b-3p	CYTH3
hsa-miR-200b-3p	PUM2
hsa-miR-200b-3p	NR4A2
hsa-miR-200b-3p	CYTH1
hsa-miR-200b-3p	SLC6A9
hsa-miR-200b-3p	LRRC8A
hsa-miR-200b-3p	MTAP
hsa-miR-200b-3p	TMPO
hsa-miR-200b-3p	ALDH1A3
hsa-miR-200b-3p	C22orf39
hsa-miR-200b-3p	ACOT7
hsa-miR-200b-3p	ELOVL5
hsa-miR-200b-3p	HLA-DQA1
hsa-miR-200b-3p	ERCC4
hsa-miR-200b-3p	APPL2
hsa-miR-200b-3p	C10orf46
hsa-miR-200b-3p	GPN3
hsa-miR-200b-3p	SGPP1
hsa-miR-200b-3p	MTAC2D1
hsa-miR-200b-3p	UBE2J1
hsa-miR-200b-3p	IP6K1
hsa-miR-200b-3p	PLS3
hsa-miR-200b-3p	KLHL14
hsa-miR-200b-3p	PACRGL
hsa-miR-200b-3p	FBXL3
hsa-miR-200b-3p	MAMLD1
hsa-miR-200b-3p	SDCCAG3
hsa-miR-200b-3p	PLOD2
hsa-miR-200b-3p	ELL
hsa-miR-200b-3p	RQCD1
hsa-miR-200b-3p	RAPGEF2
hsa-miR-200b-3p	CLASP2
hsa-miR-200b-3p	TSPAN12
hsa-miR-200b-3p	LOC677759
hsa-miR-200b-3p	COPS5
hsa-miR-200b-3p	TOPBP1
hsa-miR-200b-3p	CHD1
hsa-miR-200b-3p	SUZ12P
hsa-miR-200b-3p	SAPS1
hsa-miR-200b-3p	ZBTB5
hsa-miR-200b-3p	CRISPLD1
hsa-miR-200b-3p	SLC26A11
hsa-miR-200b-3p	YWHAG
hsa-miR-200b-3p	PLEKHA5
hsa-miR-200b-3p	C11orf95
hsa-miR-200b-3p	KIAA0182
hsa-miR-200b-3p	RAB5C
hsa-miR-200b-3p	ATRX
hsa-miR-200b-3p	FARP1
hsa-miR-200b-3p	CDC27
hsa-miR-200b-3p	RAB14
hsa-miR-200b-3p	EMP1
hsa-miR-200b-3p	FSD1L
hsa-miR-200b-3p	SUGT1
hsa-miR-200b-3p	KLF12
hsa-miR-200b-3p	ANP32B
hsa-miR-200b-3p	C5orf53
hsa-miR-200b-3p	NRBP1
hsa-miR-200b-3p	GOT1
hsa-miR-200b-3p	STC2
hsa-miR-200b-3p	NRP1
hsa-miR-200b-3p	ZRANB2
hsa-miR-200b-3p	TAF9
hsa-miR-200b-3p	PSCD1
hsa-miR-200b-3p	FZD6
hsa-miR-200b-3p	FYN
hsa-miR-200b-3p	NAA16
hsa-miR-200b-3p	ESPL1
hsa-miR-200b-3p	DDEF1
hsa-miR-200b-3p	MTSS1L
hsa-miR-200b-3p	LMAN1
hsa-miR-200b-3p	RPN2
hsa-miR-200b-3p	PUM1
hsa-miR-200b-3p	HRB
hsa-miR-200b-3p	C16orf52
hsa-miR-200b-3p	RNF217
hsa-miR-200b-3p	WDR36
hsa-miR-200b-3p	STK38L
hsa-miR-200b-3p	ZNF365
hsa-miR-200b-3p	ATF7IP
hsa-miR-200b-3p	LGALS8
hsa-miR-200b-3p	SPAG9
hsa-miR-200b-3p	ZBTB38
hsa-miR-200b-3p	LPIN1
hsa-miR-200b-3p	PRR14
hsa-miR-200b-3p	C6orf1
hsa-miR-200b-3p	SUPT4H1
hsa-miR-200b-3p	CECR2
hsa-miR-200b-3p	DCUN1D4
hsa-miR-200b-3p	ZNF236
hsa-miR-200b-3p	ZC3HAV1
hsa-miR-200b-3p	ATP6V1E1
hsa-miR-200b-3p	BCL6
hsa-miR-200b-3p	PTHLH
hsa-miR-200b-3p	CLIP1
hsa-miR-200b-3p	SEC23A
hsa-miR-200b-3p	LOC92154
hsa-miR-200b-3p	ST3GAL5
hsa-miR-200b-3p	APRIN
hsa-miR-200b-3p	MIB1
hsa-miR-200b-3p	CDYL
hsa-miR-200b-3p	STYX
hsa-miR-200b-3p	RAP1A
hsa-miR-200b-3p	RND3
hsa-miR-200b-3p	YWHAB
hsa-miR-200b-3p	IGSF3
hsa-miR-200b-3p	PHF10
hsa-miR-200b-3p	ANO6
hsa-miR-200b-3p	ZNF12
hsa-miR-200b-3p	AP3D1
hsa-miR-200b-3p	MTUS1
hsa-miR-200b-3p	PRRC2C
hsa-miR-200b-3p	ITM2A
hsa-miR-200b-3p	NANOS1
hsa-miR-200b-3p	KRAS
hsa-miR-200b-3p	JKAMP
hsa-miR-200b-3p	GLCCI1
hsa-miR-200b-3p	TXLNG
hsa-miR-200b-3p	ROD1
hsa-miR-200b-3p	NCS1
hsa-miR-200b-3p	RB1CC1
hsa-miR-200b-3p	HSPA9
hsa-miR-200b-3p	CDCA4
hsa-miR-200b-3p	TSC22D2
hsa-miR-200b-3p	RBM27
hsa-miR-200b-3p	PPP1R9B
hsa-miR-200b-3p	EIF4G2
hsa-miR-200b-3p	CCNE2
hsa-miR-200b-3p	GJC1
hsa-miR-200b-3p	CDC42EP3
hsa-miR-200b-3p	ZNF131
hsa-miR-200b-3p	TMEM68
hsa-miR-200b-3p	NOP56
hsa-miR-200b-3p	EPS8
hsa-miR-200b-3p	FAM107B
hsa-miR-200b-3p	C6orf134
hsa-miR-200b-3p	RHPN2
hsa-miR-200b-3p	WSB1
hsa-miR-200b-3p	HS6ST2
hsa-miR-200b-3p	BAG6
hsa-miR-200b-3p	CDC42SE2
hsa-miR-200b-3p	RRAS2
hsa-miR-200b-3p	AP1GBP1
hsa-miR-200b-3p	HNRNPK
hsa-miR-200b-3p	LYPLAL1
hsa-miR-200b-3p	FRS2
hsa-miR-200b-3p	C6orf48
hsa-miR-200b-3p	HNRNPA1
hsa-miR-200b-3p	RBPJ
hsa-miR-200b-3p	MORC4
hsa-miR-200b-3p	PPP3R1
hsa-miR-200b-3p	DNAJB6
hsa-miR-200b-3p	SPG20
hsa-miR-200b-3p	PAK2
hsa-miR-200b-3p	MAP4K4
hsa-miR-200b-3p	TMCC1
hsa-miR-200b-3p	CAPZA2
hsa-miR-200b-3p	SDCCAG8
hsa-miR-200b-3p	TGFBR2
hsa-miR-200b-3p	ADAM10
hsa-miR-200b-3p	DLL1
hsa-miR-200b-3p	UBAC2
hsa-miR-200b-3p	TBC1D15
hsa-miR-200b-3p	SYNM
hsa-miR-200b-3p	YTHDF2
hsa-miR-200b-3p	AGFG1
hsa-miR-200b-3p	CD58
hsa-miR-200b-3p	TROVE2
hsa-miR-200b-3p	SERF2
hsa-miR-200b-3p	ATP1B1
hsa-miR-200b-3p	NARG1L
hsa-miR-200b-3p	HSPA13
hsa-miR-200b-3p	MBNL2
hsa-miR-200b-3p	KIAA0423
hsa-miR-200b-3p	CAPRIN2
hsa-miR-200b-3p	DFFB
hsa-miR-200b-3p	FOXD1
hsa-miR-200b-3p	MAT2A
hsa-miR-200b-3p	CENPQ
hsa-miR-200b-3p	RNF103
hsa-miR-200b-3p	ROCK2
hsa-miR-200b-3p	FRMD4B
hsa-miR-200b-3p	RPS6KA4
hsa-miR-200b-3p	GNAS
hsa-miR-200b-3p	KIAA0776
hsa-miR-200b-3p	M6PR
hsa-miR-200b-3p	RALBP1
hsa-miR-200b-3p	C4orf46
hsa-miR-200b-3p	DYNC1LI1
hsa-miR-200b-3p	ZNF724P
hsa-miR-200b-3p	SLAMF7
hsa-miR-200b-3p	VEGF
hsa-miR-200b-3p	LAS1L
hsa-miR-200b-3p	RDX
hsa-miR-200b-3p	ARRDC3
hsa-miR-200b-3p	CYBRD1
hsa-miR-200b-3p	BRWD3
hsa-miR-200b-3p	DNAJC8
hsa-miR-200b-3p	ZNF585A
hsa-miR-200b-3p	TMEM55B
hsa-miR-200b-3p	ADCY9
hsa-miR-200b-3p	SCARA3
hsa-miR-200b-3p	RBM12B
hsa-miR-200b-3p	CHURC1-FNTB
hsa-miR-200b-3p	ABHD3
hsa-miR-200b-3p	CSNK1A1
hsa-miR-200b-3p	ATXN1
hsa-miR-200b-3p	RNF166
hsa-miR-200b-3p	BNIP3
hsa-miR-200b-3p	C9orf25
hsa-miR-200b-3p	ZNF395
hsa-miR-200b-3p	MOSPD2
hsa-miR-200b-3p	FAM35B
hsa-miR-200b-3p	KBTBD6
hsa-miR-200b-3p	SLC25A24
hsa-miR-200b-3p	NAP1L2
hsa-miR-200b-3p	VCPIP1
hsa-miR-200b-3p	C16orf69
hsa-miR-200b-3p	RABGGTB
hsa-miR-200b-3p	VGLL3
hsa-miR-200b-3p	GNB4
hsa-miR-200b-3p	ERC1
hsa-miR-200b-3p	JHDM1D
hsa-miR-200b-3p	POLK
hsa-miR-200b-3p	NRIP1
hsa-miR-200b-3p	FMR1
hsa-miR-200b-3p	KDM3A
hsa-miR-200b-3p	HNRPD
hsa-miR-200b-3p	TNFAIP3
hsa-miR-200b-3p	ZNF518A
hsa-miR-200b-3p	CHM
hsa-miR-200b-3p	PAPD4
hsa-miR-200b-3p	CNOT6
hsa-miR-200b-3p	FZD8
hsa-miR-200b-3p	KIAA0196
hsa-miR-200b-3p	APOLD1
hsa-miR-200b-3p	LYSMD4
hsa-miR-200b-3p	PALM2-AKAP2
hsa-miR-200b-3p	TBC1D23
hsa-miR-200b-3p	FLJ33814
hsa-miR-200b-3p	PPAP2B
hsa-miR-200b-3p	CERS6
hsa-miR-200b-3p	C21orf91
hsa-miR-200b-3p	ASCC3
hsa-miR-200b-3p	PRKRA
hsa-miR-200b-3p	CADM1
hsa-miR-200b-3p	USP25
hsa-miR-200b-3p	DNAJC15
hsa-miR-200b-3p	TMOD3
hsa-miR-200b-3p	FBXO33
hsa-miR-200b-3p	BNC2
hsa-miR-200b-3p	DNAJB12
hsa-miR-200b-3p	DNMT3B
hsa-miR-200b-3p	HAUS6
hsa-miR-200b-3p	TNKS2
hsa-miR-200b-3p	DHRS1
hsa-miR-200b-3p	SSFA2
hsa-miR-200b-3p	CREBBP
hsa-miR-200b-3p	MCM10
hsa-miR-200b-3p	TPCN1
hsa-miR-200b-3p	NELL2
hsa-miR-200b-3p	TTC9C
hsa-miR-200b-3p	STXBP3
hsa-miR-200b-3p	BCL9
hsa-miR-200b-3p	WDR82
hsa-miR-200b-3p	PMP22
hsa-miR-200b-3p	GPM6A
hsa-miR-200b-3p	ZNF518
hsa-miR-200b-3p	BCL2
hsa-miR-200b-3p	CEP350
hsa-miR-200b-3p	ATP5S
hsa-miR-200b-3p	ARHGEF17
hsa-miR-200b-3p	C12orf32
hsa-miR-200b-3p	OSTM1
hsa-miR-200b-3p	LYRM2
hsa-miR-200b-3p	USP34
hsa-miR-200b-3p	PRO0149
hsa-miR-200b-3p	PLEKHA3
hsa-miR-200b-3p	IRX5
hsa-miR-200b-3p	ISOC1
hsa-miR-200b-3p	ERMP1
hsa-miR-200b-3p	VASH2
hsa-miR-200b-3p	FBXO11
hsa-miR-200b-3p	UBR1
hsa-miR-200b-3p	NPM1
hsa-miR-200b-3p	PDK4
hsa-miR-200b-3p	IGF2BP3
hsa-miR-200b-3p	GATAD2B
hsa-miR-200b-3p	GPR180
hsa-miR-200b-3p	TMEM168
hsa-miR-200b-3p	NMT2
hsa-miR-200b-3p	SEC24D
hsa-miR-200b-3p	ZDHHC21
hsa-miR-200b-3p	CHSY1
hsa-miR-200b-3p	FBLN1
hsa-miR-200b-3p	ARPC2
hsa-miR-200b-3p	DIXDC1
hsa-miR-200b-3p	EP300
hsa-miR-200b-3p	TIAL1
hsa-miR-200b-3p	UBA6
hsa-miR-200b-3p	PDIA3
hsa-miR-200b-3p	SMARCAD1
hsa-miR-200b-3p	CASK
hsa-miR-200b-3p	SMAD4
hsa-miR-200b-3p	ZYG11B
hsa-miR-200b-3p	PARP1
hsa-miR-200b-3p	CLDND1
hsa-miR-200b-3p	LMBR1
hsa-miR-200b-3p	NAA40
hsa-miR-200b-3p	SRSF1
hsa-miR-200b-3p	NCOR2
hsa-miR-200b-3p	FAM114A2
hsa-miR-200b-3p	SAPS3
hsa-miR-200b-3p	SSR1
hsa-miR-200b-3p	GBE1
hsa-miR-200b-3p	TM7SF3
hsa-miR-200b-3p	IL7
hsa-miR-200b-3p	VEZT
hsa-miR-200b-3p	AP3S1
hsa-miR-200b-3p	UBA3
hsa-miR-200b-3p	MAPK6
hsa-miR-200b-3p	NAP1L5
hsa-miR-200b-3p	BTG3
hsa-miR-200b-3p	DOCK4
hsa-miR-200b-3p	PPM1A
hsa-miR-200b-3p	HPS3
hsa-miR-200b-3p	KIAA1704
hsa-miR-200b-3p	C12orf49
hsa-miR-200b-3p	UBE2W
hsa-miR-200b-3p	FRMPD1
hsa-miR-200b-3p	LYSMD3
hsa-miR-200b-3p	METAP2
hsa-miR-200b-3p	CELF1
hsa-miR-200b-3p	TSNAX
hsa-miR-200b-3p	CDT1
hsa-miR-200b-3p	C7orf60
hsa-miR-200b-3p	ELK4
hsa-miR-200b-3p	FZD3
hsa-miR-200b-3p	TRAF3
hsa-miR-200b-3p	PCTK2
hsa-miR-200b-3p	AHNAK
hsa-miR-200b-3p	FUBP3
hsa-miR-200b-3p	DCAF13
hsa-miR-200b-3p	TAB2
hsa-miR-200b-3p	IQGAP2
hsa-miR-200b-3p	MYB
hsa-miR-200b-3p	GTF3C4
hsa-miR-200b-3p	NCKAP1
hsa-miR-200b-3p	SRD5A1
hsa-miR-200b-3p	SHOC2
hsa-miR-200b-3p	FLJ25778
hsa-miR-200b-3p	DNMT3A
hsa-miR-200b-3p	CPE
hsa-miR-200b-3p	IPO7
hsa-miR-200b-3p	SPRY2
hsa-miR-200b-3p	SH3PXD2A
hsa-miR-200b-3p	ARHGEF12
hsa-miR-200b-3p	TTC5
hsa-miR-200b-3p	FABP5
hsa-miR-200b-3p	NME2P1
hsa-miR-200b-3p	GLUL
hsa-miR-200b-3p	DCAF5
hsa-miR-200b-3p	GOLGA1
hsa-miR-200b-3p	GLI3
hsa-miR-200b-3p	C6orf107
hsa-miR-200b-3p	LIMA1
hsa-miR-200b-3p	UBE2V1
hsa-miR-200b-3p	PCGF6
hsa-miR-200b-3p	CRYZ
hsa-miR-200b-3p	CCNJL
hsa-miR-200b-3p	CIRH1A
hsa-miR-200b-3p	IFIT5
hsa-miR-200b-3p	NTN4
hsa-miR-200b-3p	TAOK3
hsa-miR-200b-3p	SFRS2
hsa-miR-200b-3p	ARF6
hsa-miR-200b-3p	SR140
hsa-miR-200b-3p	SMAD2
hsa-miR-200b-3p	ANAPC13
hsa-miR-200b-3p	NEK9
hsa-miR-200b-3p	BRMS1L
hsa-miR-200b-3p	CKAP5
hsa-miR-200b-3p	GATA2
hsa-miR-200b-3p	LRRC16A
hsa-miR-200b-3p	AKAP2
hsa-miR-200b-3p	ATG10
hsa-miR-200b-3p	RIPK4
hsa-miR-200b-3p	SLC35F5
hsa-miR-200b-3p	ATIC
hsa-miR-200b-3p	PHF6
hsa-miR-200b-3p	TEAD1
hsa-miR-200b-3p	BCL11B
hsa-miR-200b-3p	PARD6B
hsa-miR-200b-3p	KDELC1
hsa-miR-200b-3p	NSUN2
hsa-miR-200b-3p	TIPRL
hsa-miR-200b-3p	WWC3
hsa-miR-200b-3p	ABCA1
hsa-miR-200b-3p	C14orf106
hsa-miR-200b-3p	PDIK1L
hsa-miR-200b-3p	FBXL16
hsa-miR-200b-3p	FGD4
hsa-miR-200b-3p	SLC41A1
hsa-miR-200b-3p	METTL9
hsa-miR-200b-3p	MGA
hsa-miR-200b-3p	BTN2A1
hsa-miR-200b-3p	CD109
hsa-miR-200b-3p	PISD
hsa-miR-200b-3p	ASH1L
hsa-miR-200b-3p	LCORL
hsa-miR-200b-3p	RAB6A
hsa-miR-200b-3p	HS3ST3A1
hsa-miR-200b-3p	LANCL1
hsa-miR-200b-3p	EPS15
hsa-miR-200b-3p	SBF1
hsa-miR-200b-3p	KIAA2018
hsa-miR-200b-3p	RANBP17
hsa-miR-200b-3p	CD164
hsa-miR-200b-3p	IFI44L
hsa-miR-200b-3p	C4orf43
hsa-miR-200b-3p	CHMP1B
hsa-miR-200b-3p	IFIT3
hsa-miR-200b-3p	IMPAD1
hsa-miR-200b-3p	BLCAP
hsa-miR-200b-3p	USP3
hsa-miR-200b-3p	RBM9
hsa-miR-200b-3p	NUDT19
hsa-miR-200b-3p	ARL1
hsa-miR-200b-3p	ADAM9
hsa-miR-200b-3p	TMEM87A
hsa-miR-200b-3p	UBP1
hsa-miR-200b-3p	UCHL5
hsa-miR-200b-3p	IAH1
hsa-miR-200b-3p	TRIM5
hsa-miR-200b-3p	KCNMB4
hsa-miR-200b-3p	DENND5B
hsa-miR-200b-3p	NFYA
hsa-miR-200b-3p	NDUFS1
hsa-miR-200b-3p	FBXL20
hsa-miR-200b-3p	MUL1
hsa-miR-200b-3p	SNAI2
hsa-miR-200b-3p	ANXA7
hsa-miR-200b-3p	TXNRD1
hsa-miR-200b-3p	PDCD4
hsa-miR-200b-3p	TNRC6C
hsa-miR-200b-3p	SHPRH
hsa-miR-200b-3p	ATP6V0A2
hsa-miR-200b-3p	DDX47
hsa-miR-200b-3p	TAF5L
hsa-miR-200b-3p	CREG1
hsa-miR-200b-3p	SPIN4
hsa-miR-200b-3p	SKAP2
hsa-miR-200b-3p	DNAJC24
hsa-miR-200b-3p	CDK17
hsa-miR-200b-3p	RALGPS2
hsa-miR-200b-3p	MIER3
hsa-miR-200b-3p	DIP2B
hsa-miR-200b-3p	IGF2R
hsa-miR-200b-3p	NUMB
hsa-miR-200b-3p	CELSR2
hsa-miR-200b-3p	ZSCAN12
hsa-miR-200b-3p	CBX4
hsa-miR-200b-3p	ARIH2
hsa-miR-200b-3p	LUC7L3
hsa-miR-200b-3p	KDM5A
hsa-miR-200b-3p	MSL2
hsa-miR-200b-3p	PCNX
hsa-miR-200b-3p	YAP1
hsa-miR-200b-3p	CCT4
hsa-miR-200b-3p	JAZF1
hsa-miR-200b-3p	SNX10
hsa-miR-200b-3p	SLC39A9
hsa-miR-200b-3p	UBQLN2
hsa-miR-200b-3p	KANK2
hsa-miR-200b-3p	BAG5
hsa-miR-200b-3p	NLK
hsa-miR-200b-3p	RGL1
hsa-miR-200b-3p	TOR1AIP1
hsa-miR-200b-3p	TIA1
hsa-miR-200b-3p	KLHL5
hsa-miR-200b-3p	LCP1
hsa-miR-200b-3p	LIN54
hsa-miR-200b-3p	C5orf13
hsa-miR-200b-3p	AFG3L1
hsa-miR-200b-3p	SYDE1
hsa-miR-200b-3p	ARL2BP
hsa-miR-200b-3p	PRKAG2
hsa-miR-200b-3p	SETD7
hsa-miR-200b-3p	FDFT1
hsa-miR-200b-3p	CDCA7
hsa-miR-200b-3p	RHOT1
hsa-miR-200b-3p	GCOM1
hsa-miR-200b-3p	EEF1E1
hsa-miR-200b-3p	PHAX
hsa-miR-200b-3p	FLJ25476
hsa-miR-200b-3p	PPP1R10
hsa-miR-200b-3p	GPC4
hsa-miR-200b-3p	SLITRK5
hsa-miR-200b-3p	CHEK1
hsa-miR-200b-3p	STAU2
hsa-miR-200b-3p	ZNF614
hsa-miR-200b-3p	PTPN12
hsa-miR-200b-3p	RNF5P1
hsa-miR-200b-3p	TIFA
hsa-miR-200b-3p	CNNM3
hsa-miR-200b-3p	ELAVL2
hsa-miR-200b-3p	TMEM189-UBE2V1
hsa-miR-200b-3p	CLINT1
hsa-miR-200b-3p	ZC3H4
hsa-miR-200b-3p	WDFY1
hsa-miR-200b-3p	DPP8
hsa-miR-200b-3p	HMGB1
hsa-miR-200b-3p	MAL2
hsa-miR-200b-3p	CEBPD
hsa-miR-200b-3p	SPOPL
hsa-miR-200b-3p	ARID1A
hsa-miR-200b-3p	LRCH2
hsa-miR-200b-3p	FSCN1
hsa-miR-200b-3p	CNKSR3
hsa-miR-200b-3p	DDX6
hsa-miR-200b-3p	C14orf100
hsa-miR-200b-3p	CCNT2
hsa-miR-200b-3p	GAN
hsa-miR-200b-3p	TTC39C
hsa-miR-200b-3p	FAM168B
hsa-miR-200b-3p	GNB5
hsa-miR-200b-3p	PMPCB
hsa-miR-200b-3p	SOCS4
hsa-miR-200b-3p	ZNF274
hsa-miR-200b-3p	TOMM20
hsa-miR-200b-3p	TBL1XR1
hsa-miR-200b-3p	DACT1
hsa-miR-200b-3p	CUTC
hsa-miR-200b-3p	ZFHX4
hsa-miR-200b-3p	RABIF
hsa-miR-200b-3p	ZNF720
hsa-miR-200b-3p	LRP11
hsa-miR-200b-3p	OSBPL11
hsa-miR-200b-3p	PGM2L1
hsa-miR-200b-3p	SLC30A7
hsa-miR-200b-3p	LRCH1
hsa-miR-200b-3p	BRWD1
hsa-miR-200b-3p	PFDN4
hsa-miR-200b-3p	CNOT7
hsa-miR-200b-3p	SLC1A1
hsa-miR-200b-3p	ZNF521
hsa-miR-200b-3p	TMEM167A
hsa-miR-200b-3p	DEPDC1B
hsa-miR-200b-3p	CDK5R1
hsa-miR-200b-3p	PTPN13
hsa-miR-200b-3p	KIF5B
hsa-miR-200b-3p	UBE2G2
hsa-miR-200b-3p	SCOC
hsa-miR-200b-3p	GUCY1B3
hsa-miR-200b-3p	FAM117B
hsa-miR-200b-3p	NCOA7
hsa-miR-200b-3p	GNG12
hsa-miR-200b-3p	USP28
hsa-miR-200b-3p	EIF5A2
hsa-miR-200b-3p	ZNF326
hsa-miR-200b-3p	ATP5B
hsa-miR-200b-3p	VTA1
hsa-miR-200b-3p	HLA-DRB1
hsa-miR-200b-3p	ATG12
hsa-miR-200b-3p	IER5
hsa-miR-200b-3p	FAM160B1
hsa-miR-200b-3p	GPC6
hsa-miR-200b-3p	MGC33926
hsa-miR-200b-3p	HEG1
hsa-miR-200b-3p	JUN
hsa-miR-200b-3p	MAP4K5
hsa-miR-200b-3p	ZNF692
hsa-miR-200b-3p	POLR1B
hsa-miR-200b-3p	ZSWIM4
hsa-miR-200b-3p	GNL2
hsa-miR-200b-3p	MRPL42
hsa-miR-200b-3p	PRTG
hsa-miR-200b-3p	ANKMY2
hsa-miR-200b-3p	TLN1
hsa-miR-200b-3p	TAB3
hsa-miR-200b-3p	EBF1
hsa-miR-200b-3p	UGP2
hsa-miR-200b-3p	SERPINH1
hsa-miR-200b-3p	SNORD45B
hsa-miR-200b-3p	CLOCK
hsa-miR-200b-3p	HECTD2
hsa-miR-200b-3p	TUBB2A
hsa-miR-200b-3p	SCML2
hsa-miR-200b-3p	SCAMP1
hsa-miR-200b-3p	CHD9
hsa-miR-200b-3p	FLJ31951
hsa-miR-200b-3p	RFC3
hsa-miR-200b-3p	ZDHHC6
hsa-miR-200b-3p	SHCBP1
hsa-miR-200b-3p	MFHAS1
hsa-miR-200b-3p	RPGR
hsa-miR-200b-3p	ROCK1
hsa-miR-200b-3p	FUBP1
hsa-miR-200b-3p	PSPC1
hsa-miR-200b-3p	SLC19A2
hsa-miR-200b-3p	SUCLA2
hsa-miR-200b-3p	ONECUT2
hsa-miR-200b-3p	SERPINI1
hsa-miR-200b-3p	RLIM
hsa-miR-200b-3p	MGC52057
hsa-miR-200b-3p	LBR
hsa-miR-200b-3p	PNRC2
hsa-miR-200b-3p	STEAP4
hsa-miR-200b-3p	ZSCAN20
hsa-miR-200b-3p	USP38
hsa-miR-200b-3p	PKIA
hsa-miR-200b-3p	LTBP1
hsa-miR-200b-3p	FSTL1
hsa-miR-200b-3p	ARHGDIA
hsa-miR-200b-3p	DDX55
hsa-miR-200b-3p	C18orf19
hsa-miR-200b-3p	PCGF4
hsa-miR-200b-3p	UBE2I
hsa-miR-200b-3p	PKN2
hsa-miR-200b-3p	BRP44L
hsa-miR-200b-3p	PPWD1
hsa-miR-200b-3p	MMADHC
hsa-miR-200b-3p	ZDHHC17
hsa-miR-200b-3p	FZD7
hsa-miR-200b-3p	KLF4
hsa-miR-200b-3p	WDR42A
hsa-miR-200b-3p	ZNF294
hsa-miR-200b-3p	TTLL5
hsa-miR-200b-3p	CNIH
hsa-miR-200b-3p	FAM169A
hsa-miR-200b-3p	LZTFL1
hsa-miR-200b-3p	PLCL1
hsa-miR-200b-3p	MAMDC2
hsa-miR-200b-3p	MCM8
hsa-miR-200b-3p	RBM41
hsa-miR-200b-3p	MAML2
hsa-miR-200b-3p	EIF2C4
hsa-miR-200b-3p	AKT2
hsa-miR-200b-3p	NCOR1
hsa-miR-200b-3p	SMG8
hsa-miR-200b-3p	STAG1
hsa-miR-200b-3p	RAB8B
hsa-miR-200b-3p	SMURF1
hsa-miR-200b-3p	KIAA1718
hsa-miR-200b-3p	EDEM3
hsa-miR-200b-3p	JMY
hsa-miR-200b-3p	ZKSCAN1
hsa-miR-200b-3p	SFXN1
hsa-miR-200b-3p	ALG6
hsa-miR-200b-3p	CLIC4
hsa-miR-200b-3p	TRAM1
hsa-miR-200b-3p	C14orf135
hsa-miR-200b-3p	ALDH5A1
hsa-miR-200b-3p	EREG
hsa-miR-200b-3p	SETX
hsa-miR-200b-3p	RNF19A
hsa-miR-200b-3p	ERRFI1
hsa-miR-200b-3p	BMI1
hsa-miR-200b-3p	TRERF1
hsa-miR-200b-3p	EIF4G1
hsa-miR-200b-3p	PSAT1
hsa-miR-200b-3p	ZC3H7A
hsa-miR-200b-3p	LATS1
hsa-miR-200b-3p	OSMR
hsa-miR-200b-3p	MLLT10
hsa-miR-200b-3p	FAM91A1
hsa-miR-200b-3p	CDCA7L
hsa-miR-200b-3p	WNT5A
hsa-miR-200b-3p	MKLN1
hsa-miR-200b-3p	GPCPD1
hsa-miR-200b-3p	MGAT2
hsa-miR-200b-3p	SEC23IP
hsa-miR-200b-3p	TIMM17B
hsa-miR-200b-3p	TPD52L1
hsa-miR-200b-3p	NIFIE14
hsa-miR-200b-3p	ARID4B
hsa-miR-200b-3p	CHSY3
hsa-miR-200b-3p	LOC399815
hsa-miR-200b-3p	ZNF265
hsa-miR-200b-3p	EPAS1
hsa-miR-200b-3p	STX16
hsa-miR-200b-3p	MLEC
hsa-miR-200b-3p	MARCKS
hsa-miR-200b-3p	GCLM
hsa-miR-200b-3p	GLT8D3
hsa-miR-200b-3p	MID1
hsa-miR-200b-3p	HDAC8
hsa-miR-200b-3p	SECISBP2L
hsa-miR-200b-3p	CDK19
hsa-miR-200b-3p	FAM96A
hsa-miR-200b-3p	RIPK2
hsa-miR-200b-3p	SMC6
hsa-miR-200b-3p	SGCE
hsa-miR-200b-3p	RAB3GAP2
hsa-miR-200b-3p	DARS
hsa-miR-200b-3p	SLC35F2
hsa-miR-200b-3p	CPSF6
hsa-miR-200b-3p	PLA2G12A
hsa-miR-200b-3p	PELI2
hsa-miR-200b-3p	CLSPN
hsa-miR-200b-3p	NDUFS4
hsa-miR-200b-3p	ZZZ3
hsa-miR-200b-3p	ZIC5
hsa-miR-200b-3p	KIAA0040
hsa-miR-200b-3p	ANKRD15
hsa-miR-200b-3p	NPR3
hsa-miR-200b-3p	MICAL3
hsa-miR-200b-3p	ZCCHC10
hsa-miR-200b-3p	LPHN2
hsa-miR-200b-3p	RNF145
hsa-miR-200b-3p	BAGE5
hsa-miR-200b-3p	KLRAQ1
hsa-miR-200b-3p	CASD1
hsa-miR-200b-3p	ADD3
hsa-miR-200b-3p	PPP1R8
hsa-miR-200b-3p	EDNRA
hsa-miR-200b-3p	SAR1B
hsa-miR-200b-3p	KCTD15
hsa-miR-200b-3p	PDE5A
hsa-miR-200b-3p	PCM1
hsa-miR-200b-3p	THAP2
hsa-miR-200b-3p	SSH2
hsa-miR-200b-3p	ACTR3
hsa-miR-200b-3p	NUFIP2
hsa-miR-200b-3p	RBM47
hsa-miR-200b-3p	PCNP
hsa-miR-200b-3p	PITPNM3
hsa-miR-200b-3p	ZNF248
hsa-miR-200b-3p	TMEM135
hsa-miR-200b-3p	NGRN
hsa-miR-200b-3p	SOS1
hsa-miR-200b-3p	C3orf34
hsa-miR-200b-3p	AUTS2
hsa-miR-200b-3p	ATL2
hsa-miR-200b-3p	FCHO2
hsa-miR-200b-3p	GIGYF2
hsa-miR-200b-3p	HOXB2
hsa-miR-200b-3p	DUSP7
hsa-miR-200b-3p	CDH2
hsa-miR-200b-3p	TK2
hsa-miR-200b-3p	RAP2A
hsa-miR-200b-3p	CUL4A
hsa-miR-200b-3p	SPTBN1
hsa-miR-200b-3p	SLC12A6
hsa-miR-200b-3p	WDR45L
hsa-miR-200b-3p	TES
hsa-miR-200b-3p	CNOT10
hsa-miR-200b-3p	NOC3L
hsa-miR-200b-3p	PAPSS1
hsa-miR-200b-3p	RUFY2
hsa-miR-200b-3p	RRP15
hsa-miR-200b-3p	KHDRBS1
hsa-miR-200b-3p	NIP7
hsa-miR-200b-3p	SUB1
hsa-miR-200b-3p	PCYOX1
hsa-miR-200b-3p	CREBL2
hsa-miR-200b-3p	10-Sep
hsa-miR-200b-3p	TMEM178
hsa-miR-200b-3p	PAK6
hsa-miR-200b-3p	NUP35
hsa-miR-200b-3p	ERG
hsa-miR-200b-3p	MAGOH
hsa-miR-200b-3p	MGC24039
hsa-miR-200b-3p	MINPP1
hsa-miR-200b-3p	LEMD3
hsa-miR-200b-3p	CDS2
hsa-miR-200b-3p	RBMS1
hsa-miR-200b-3p	SCARNA17
hsa-miR-200b-3p	FLJ12505
hsa-miR-200b-3p	PAN3
hsa-miR-200b-3p	CSNK1G3
hsa-miR-200b-3p	SDR16C5
hsa-miR-200b-3p	IFIT2
hsa-miR-200b-3p	ADIPOR2
hsa-miR-200b-3p	PERQ1
hsa-miR-200b-3p	DLC1
hsa-miR-200b-3p	PLK2
hsa-miR-200b-3p	KIF21A
hsa-miR-200b-3p	REEP1
hsa-miR-200b-3p	ZBTB10
hsa-miR-200b-3p	C3orf58
hsa-miR-200b-3p	POP5
hsa-miR-200b-3p	SAMD8
hsa-miR-200b-3p	ITGA11
hsa-miR-200b-3p	KYNU
hsa-miR-200b-3p	FAM135A
hsa-miR-200b-3p	SYNJ1
hsa-miR-200b-3p	ZNF238
hsa-miR-200b-3p	MESDC1
hsa-miR-200b-3p	MTERFD1
hsa-miR-200b-3p	ROR2
hsa-miR-200b-3p	RRM2B
hsa-miR-200b-3p	SLC5A3
hsa-miR-200b-3p	PCBP1
hsa-miR-200b-3p	SPRED1
hsa-miR-200b-3p	DNAJB14
hsa-miR-200b-3p	SLC25A36
hsa-miR-200b-3p	STRN3
hsa-miR-200b-3p	NDFIP2
hsa-miR-200b-3p	DDB2
hsa-miR-200b-3p	DENND5A
hsa-miR-200b-3p	C5orf35
hsa-miR-200b-3p	CKAP2L
hsa-miR-200b-3p	USP46
hsa-miR-200b-3p	RNF139
hsa-miR-200b-3p	ZNF655
hsa-miR-200b-3p	C11orf82
hsa-miR-200b-3p	BAG4
hsa-miR-200b-3p	SFRS18
hsa-miR-200b-3p	KIAA0802
hsa-miR-200b-3p	THAP1
hsa-miR-200b-3p	C1orf109
hsa-miR-200b-3p	CEP120
hsa-miR-200b-3p	RNPS1
hsa-miR-200b-3p	RAB18
hsa-miR-200b-3p	SRF
hsa-miR-200b-3p	PPT1
hsa-miR-200b-3p	ZFHX1B
hsa-miR-200b-3p	FASTKD3
hsa-miR-200b-3p	TINAGL1
hsa-miR-200b-3p	TAP2
hsa-miR-200b-3p	NMNAT3
hsa-miR-200b-3p	C17orf71
hsa-miR-200b-3p	CCNL2
hsa-miR-200b-3p	ASF1A
hsa-miR-200b-3p	ZMYND11
hsa-miR-200b-3p	PDCD2
hsa-miR-200b-3p	COBLL1
hsa-miR-200b-3p	ZNF317
hsa-miR-200b-3p	ZFAND1
hsa-miR-200b-3p	MSN
hsa-miR-200b-3p	FIGN
hsa-miR-200b-3p	FAM118B
hsa-miR-200b-3p	C7orf41
hsa-miR-200b-3p	SUMO1
hsa-miR-200b-3p	EIF4G3
hsa-miR-200b-3p	TJP1
hsa-miR-200b-3p	MDC1
hsa-miR-200b-3p	TP53INP1
hsa-miR-200b-3p	BAGE2
hsa-miR-200b-3p	SNORA56
hsa-miR-200b-3p	AMMECR1L
hsa-miR-200b-3p	SPPL2A
hsa-miR-200b-3p	CACHD1
hsa-miR-200b-3p	PCF11
hsa-miR-200b-3p	ANO5
hsa-miR-200b-3p	RAB6IP1
hsa-miR-200b-3p	FAM48A
hsa-miR-200b-3p	SIK2
hsa-miR-200b-3p	RNF6
hsa-miR-200b-3p	LCA5
hsa-miR-200b-3p	C2orf68
hsa-miR-200b-3p	LMAN2
hsa-miR-200b-3p	SLMAP
hsa-miR-200b-3p	FAM199X
hsa-miR-200b-3p	GATA4
hsa-miR-200b-3p	MAP3K13
hsa-miR-200b-3p	SH3BP5
hsa-miR-200b-3p	STARD7
hsa-miR-200b-3p	NFIA
hsa-miR-200b-3p	TRIM39
hsa-miR-200b-3p	HMOX1
hsa-miR-200b-3p	MAPRE1
hsa-miR-200b-3p	FTSJD1
hsa-miR-200b-3p	TMEM147
hsa-miR-200b-3p	S100PBP
hsa-miR-200b-3p	MLL3
hsa-miR-200b-3p	ZA20D3
hsa-miR-200b-3p	ANO3
hsa-miR-200b-3p	ACYP2
hsa-miR-200b-3p	SIN3A
hsa-miR-200b-3p	ATAD1
hsa-miR-200b-3p	C6orf62
hsa-miR-200b-3p	UGGT2
hsa-miR-200b-3p	MPRIP
hsa-miR-200b-3p	PPP1CB
hsa-miR-200b-3p	CHD6
hsa-miR-200b-3p	ELK3
hsa-miR-200b-3p	C10orf26
hsa-miR-200b-3p	IMPA1
hsa-miR-200b-3p	TLL1
hsa-miR-200b-3p	MRE11A
hsa-miR-200b-3p	RAP1B
hsa-miR-200b-3p	VLDLR
hsa-miR-200b-3p	TRAPPC10
hsa-miR-200b-3p	SLC4A7
hsa-miR-200b-3p	HLA-DPA1
hsa-miR-200b-3p	HIPK3
hsa-miR-200b-3p	KIAA1244
hsa-miR-200b-3p	DUSP8
hsa-miR-200b-3p	KLF6
hsa-miR-200b-3p	BDP1
hsa-miR-200b-3p	TDP1
hsa-miR-200b-3p	SMURF2
hsa-miR-200b-3p	RAB7A
hsa-miR-200b-3p	B3GNT1
hsa-miR-200b-3p	TRIM2
hsa-miR-200b-3p	PPM1E
hsa-miR-200b-3p	CD9
hsa-miR-200b-3p	CCNJ
hsa-miR-200b-3p	CCDC127
hsa-miR-200b-3p	RAPGEF4
hsa-miR-200b-3p	ASPH
hsa-miR-200b-3p	RHOA
hsa-miR-200b-3p	WDR11
hsa-miR-200b-3p	ARL6
hsa-miR-200b-3p	ZNF708
hsa-miR-200b-3p	LYN
hsa-miR-200b-3p	BVES
hsa-miR-200b-3p	AHI1
hsa-miR-200b-3p	M-RIP
hsa-miR-200b-3p	PRKD3
hsa-miR-200b-3p	PRMT6
hsa-miR-200b-3p	COL5A3
hsa-miR-200b-3p	OXR1
hsa-miR-200b-3p	HOXD1
hsa-miR-200b-3p	C1GALT1
hsa-miR-200b-3p	ZNF567
hsa-miR-200b-3p	RAP1BL
hsa-miR-200b-3p	TM4SF1
hsa-miR-200b-3p	RIMKLB
hsa-miR-200b-3p	TGFBI
hsa-miR-200b-3p	CRIM1
hsa-miR-200b-3p	ATP5G3
hsa-miR-200b-3p	CYP2E1
hsa-miR-200b-3p	HERC3
hsa-miR-200b-3p	CORO1C
hsa-miR-200b-3p	MBD5
hsa-miR-200b-3p	DNAJC10
hsa-miR-200b-3p	HMMR
hsa-miR-200b-3p	LMBRD1
hsa-miR-200b-3p	TAPT1
hsa-miR-200b-3p	CIAPIN1
hsa-miR-200b-3p	ANKRD13C
hsa-miR-200b-3p	MKL2
hsa-miR-200b-3p	RTF1
hsa-miR-200b-3p	INTS8
hsa-miR-200b-3p	CAMSAP1
hsa-miR-200b-3p	RAB11FIP2
hsa-miR-200b-3p	RAD23B
hsa-miR-200b-3p	AP1AR
hsa-miR-200b-3p	ARHGEF3
hsa-miR-200b-3p	ADAMTS3
hsa-miR-200b-3p	RBL2
hsa-miR-200b-3p	ERLIN1
hsa-miR-200b-3p	FREQ
hsa-miR-200b-3p	NUP153
hsa-miR-200b-3p	PIGM
hsa-miR-200b-3p	DKK3
hsa-miR-200b-3p	NIN
hsa-miR-200b-3p	ADSS
hsa-miR-200b-3p	KBTBD11
hsa-miR-200b-3p	ZNF217
hsa-miR-200b-3p	ARHGEF10
hsa-miR-200b-3p	POLR2B
hsa-miR-200b-3p	SLC35E1
hsa-miR-200b-3p	POC1B
hsa-miR-200b-3p	FAM76B
hsa-miR-200b-3p	ASAP2
hsa-miR-200b-3p	EPHA5
hsa-miR-200b-3p	RAP2C
hsa-miR-200b-3p	AKAP11
hsa-miR-200b-3p	HNRPH2
hsa-miR-200b-3p	FNBP4
hsa-miR-200b-3p	NET1
hsa-miR-200b-3p	CTAGE5
hsa-miR-200b-3p	GRHL1
hsa-miR-200b-3p	ILF3
hsa-miR-200b-3p	FBLN5
hsa-miR-200b-3p	MORC3
hsa-miR-200b-3p	CDC42EP4
hsa-miR-200b-3p	WBP4
hsa-miR-200b-3p	CAND1
hsa-miR-200b-3p	VEGFA
hsa-miR-200b-3p	SCP2
hsa-miR-200b-3p	COPS8
hsa-miR-200b-3p	COL4A1
hsa-miR-200b-3p	KIAA0101
hsa-miR-200b-3p	CDR2
hsa-miR-200b-3p	UBN2
hsa-miR-200b-3p	RAB7
hsa-miR-200b-3p	MAPK9
hsa-miR-200b-3p	TSEN2
hsa-miR-200b-3p	OSBP
hsa-miR-200b-3p	TMEM131
hsa-miR-200b-3p	ALG2
hsa-miR-200b-3p	MED13L
hsa-miR-200b-3p	BAT2L2
hsa-miR-200b-3p	KIAA2026
hsa-miR-200b-3p	YOD1
hsa-miR-200b-3p	MAFG
hsa-miR-200b-3p	EFNA1
hsa-miR-200b-3p	PDGFB
hsa-miR-200b-3p	CCNYL1
hsa-miR-200b-3p	SEMA4C
hsa-miR-200b-3p	LOC339290
hsa-miR-200b-3p	ORMDL3
hsa-miR-200b-3p	ARGLU1
hsa-miR-200b-3p	SAR1A
hsa-miR-200b-3p	COMMD3-BMI1
hsa-miR-200b-3p	TBC1D22B
hsa-miR-200b-3p	CDR2L
hsa-miR-200b-3p	TFPI
hsa-miR-200b-3p	ARHGAP12
hsa-miR-200b-3p	NOTCH1
hsa-miR-200b-3p	SNRK
hsa-miR-200b-3p	LIMS1
hsa-miR-200b-3p	USP31
hsa-miR-200b-3p	PLAGL2
hsa-miR-200b-3p	MAN1A2
hsa-miR-200b-3p	GOSR2
hsa-miR-200b-3p	PIM2
hsa-miR-200b-3p	KDSR
hsa-miR-200b-3p	KIF14
hsa-miR-200b-3p	TSPAN33
hsa-miR-200b-3p	TSGA14
hsa-miR-200b-3p	CRLF3
hsa-miR-200b-3p	SLAIN1
hsa-miR-200b-3p	C1orf174
hsa-miR-200b-3p	ZFP36
hsa-miR-200b-3p	NEO1
hsa-miR-200b-3p	SPATS2L
hsa-miR-200b-3p	PTPRE
hsa-miR-200b-3p	PTBP2
hsa-miR-200b-3p	RNF122
hsa-miR-200b-3p	ZSWIM6
hsa-miR-200b-3p	ANK2
hsa-miR-200b-3p	MOBKL3
hsa-miR-200b-3p	OTX1
hsa-miR-200b-3p	CCDC28A
hsa-miR-200b-3p	DNM1L
hsa-miR-200b-3p	AFF4
hsa-miR-200b-3p	PRKCA
hsa-miR-200b-3p	NT5DC1
hsa-miR-200b-3p	RBBP6
hsa-miR-200b-3p	LOX
hsa-miR-200b-3p	NEDD1
hsa-miR-200b-3p	TESK2
hsa-miR-200b-3p	PCTK1
hsa-miR-200b-3p	ZNF561
hsa-miR-200b-3p	CPNE8
hsa-miR-200b-3p	GABPA
hsa-miR-200b-3p	FERMT2
hsa-miR-200b-3p	PTGER4
hsa-miR-200b-3p	TC2N
hsa-miR-200b-3p	FOXG1B
hsa-miR-200b-3p	COL4A6
hsa-miR-200b-3p	RAC1
hsa-miR-200b-3p	CREB5
hsa-miR-200b-3p	HNRPK
hsa-miR-200b-3p	TMEM41B
hsa-miR-200b-3p	CDKN1B
hsa-miR-200b-3p	PDPK1
hsa-miR-200b-3p	EIF4A2
hsa-miR-200b-3p	PREPL
hsa-miR-200b-3p	OCLN
hsa-miR-200b-3p	TMEM136
hsa-miR-200b-3p	NUDT3
hsa-miR-200b-3p	ETF1
hsa-miR-200b-3p	CAB39
hsa-miR-200b-3p	CTBP2
hsa-miR-200b-3p	KL
hsa-miR-200b-3p	YEATS4
hsa-miR-200b-3p	ESYT2
hsa-miR-200b-3p	HOXC5
hsa-miR-200b-3p	KIAA1462
hsa-miR-200b-3p	FBXW2
hsa-miR-200b-3p	BMPER
hsa-miR-200b-3p	EFNB2
hsa-miR-200b-3p	IQGAP1
hsa-miR-200b-3p	RNF2
hsa-miR-200b-3p	FYTTD1
hsa-miR-200b-3p	HECTD1
hsa-miR-200b-3p	MLL5
hsa-miR-200b-3p	TAOK1
hsa-miR-200b-3p	POLR1D
hsa-miR-200b-3p	GPR146
hsa-miR-200b-3p	GLYR1
hsa-miR-200b-3p	NPAT
hsa-miR-200b-3p	HAS2
hsa-miR-200b-3p	C9orf72
hsa-miR-200b-3p	SNX6
hsa-miR-200b-3p	CCDC132
hsa-miR-200b-3p	ATF7
hsa-miR-200b-3p	PHF17
hsa-miR-200b-3p	WAPAL
hsa-miR-200b-3p	ZEB1
hsa-miR-200b-3p	RRN3P2
hsa-miR-200b-3p	FOSL1
hsa-miR-200b-3p	TRIP13
hsa-miR-200b-3p	KIAA1468
hsa-miR-200b-3p	RASSF8
hsa-miR-200b-3p	RNF38
hsa-miR-200b-3p	ARNT
hsa-miR-200b-3p	RP2
hsa-miR-200b-3p	UBXN8
hsa-miR-200b-3p	ZNF6
hsa-miR-200b-3p	RAVER2
hsa-miR-200b-3p	BAT3
hsa-miR-200b-3p	EPHA3
hsa-miR-200b-3p	QKI
hsa-miR-200b-3p	C6orf167
hsa-miR-200b-3p	ZNF673
hsa-miR-200b-3p	NRBF2
hsa-miR-200b-3p	RELL1
hsa-miR-200b-3p	PRKCI
hsa-miR-200b-3p	SFRS1
hsa-miR-200b-3p	RNF138
hsa-miR-200b-3p	EMG1
hsa-miR-200b-3p	KIAA1949
hsa-miR-200b-3p	RBM3
hsa-miR-200b-3p	ETS2
hsa-miR-200b-3p	WHSC1
hsa-miR-200b-3p	FKSG44
hsa-miR-200b-3p	MRFAP1
hsa-miR-200b-3p	APLP2
hsa-miR-200b-3p	NCK1
hsa-miR-200b-3p	TMEM45A
hsa-miR-200b-3p	APP
hsa-miR-200b-3p	ZFAND6
hsa-miR-200b-3p	TSC22D1
hsa-miR-200b-3p	RABEP1
hsa-miR-200b-3p	EIF4B
hsa-miR-200b-3p	RABL3
hsa-miR-200b-3p	TAF1B
hsa-miR-200b-3p	GXYLT1
hsa-miR-200b-3p	FAM49B
hsa-miR-200b-3p	CFH
hsa-miR-200b-3p	WBP5
hsa-miR-200b-3p	GOLGB1
hsa-miR-200b-3p	SPATA2
hsa-miR-200b-3p	TTL
hsa-miR-200b-3p	COX11
hsa-miR-200b-3p	ZNF697
hsa-miR-200b-3p	PAIP2
hsa-miR-200b-3p	KIAA1012
hsa-miR-200b-3p	PLEKHC1
hsa-miR-200b-3p	TACC1
hsa-miR-200b-3p	TAF12
hsa-miR-200b-3p	PHACTR2
hsa-miR-200b-3p	TUBB
hsa-miR-200b-3p	TRPC3
hsa-miR-200b-3p	CASP2
hsa-miR-200b-3p	NEDD4
hsa-miR-200b-3p	PRPF39
hsa-miR-200b-3p	MRPS35
hsa-miR-200b-3p	IFRD2
hsa-miR-200b-3p	PRDM1
hsa-miR-200b-3p	CDK2
hsa-miR-200b-3p	OMA1
hsa-miR-200b-3p	EPC2
hsa-miR-200b-3p	CRTAP
hsa-miR-200b-3p	RDH10
hsa-miR-200b-3p	GART
hsa-miR-200b-3p	ACVR1C
hsa-miR-200b-3p	AEBP2
hsa-miR-200b-3p	ARHGAP26
hsa-miR-200b-3p	KLF10
hsa-miR-200b-3p	BCAP29
hsa-miR-200b-3p	LOC284561
hsa-miR-200b-3p	NUCB2
hsa-miR-200b-3p	PPARGC1A
hsa-miR-200b-3p	MED8
hsa-miR-200b-3p	6-Mar
hsa-miR-200b-3p	FHL1
hsa-miR-200b-3p	B4GALT6
hsa-miR-200b-3p	EGR1
hsa-miR-200b-3p	RALB
hsa-miR-200b-3p	ITPR1
hsa-miR-200b-3p	PAM
hsa-miR-200b-3p	CLASP1
hsa-miR-200b-3p	DDX26B
hsa-miR-200b-3p	TPBG
hsa-miR-200b-3p	C17orf69
hsa-miR-200b-3p	CD80
hsa-miR-200b-3p	GRINL1A
hsa-miR-200b-3p	KDR
hsa-miR-200b-3p	LRRC40
hsa-miR-200b-3p	GSK3B
hsa-miR-200b-3p	ANKRD57
hsa-miR-200b-3p	OAS1
hsa-miR-200b-3p	ST3GAL2
hsa-miR-200b-3p	SOAT1
hsa-miR-200b-3p	EML4
hsa-miR-200b-3p	METAP1
hsa-miR-200b-3p	ZDHHC18
hsa-miR-200b-3p	WASF1
hsa-miR-200b-3p	MAP3K1
hsa-miR-200b-3p	MTRF1L
hsa-miR-200b-3p	DMXL1
hsa-miR-200b-3p	RAB21
hsa-miR-200b-3p	STAM2
hsa-miR-200b-3p	NUF2
hsa-miR-200b-3p	RPAP3
hsa-miR-200b-3p	OCIAD1
hsa-miR-200b-3p	SLC30A5
hsa-miR-200b-3p	ZRANB3
hsa-miR-200b-3p	SPINK13
hsa-miR-200b-3p	UNC50
hsa-miR-200b-3p	MFAP5
hsa-miR-200b-3p	NCOA3
hsa-miR-200b-3p	IL6
hsa-miR-200b-3p	SNAPC1
hsa-miR-200b-3p	C12orf29
hsa-miR-200b-3p	NR3C1
hsa-miR-200b-3p	LFNG
hsa-miR-200b-3p	CEP76
hsa-miR-200b-3p	SLC38A2
hsa-miR-200b-3p	LTN1
hsa-miR-200b-3p	PDZD2
hsa-miR-200b-3p	REEP5
hsa-miR-200b-3p	PPIL4
hsa-miR-200b-3p	RBM26
hsa-miR-200b-3p	THEX1
hsa-miR-200b-3p	PM20D2
hsa-miR-200b-3p	LOC727896
hsa-miR-200b-3p	C2orf42
hsa-miR-200b-3p	HAT1
hsa-miR-200b-3p	FRMD8
hsa-miR-200b-3p	CDK16
hsa-miR-200b-3p	MSL2L1
hsa-miR-200b-3p	SLC16A14
hsa-miR-200b-3p	FAM60A
hsa-miR-200b-3p	WDR47
hsa-miR-200b-3p	TNFRSF11B
hsa-miR-200b-3p	C14orf147
hsa-miR-200b-3p	GPBP1
hsa-miR-200b-3p	SMCR7L
hsa-miR-200b-3p	MEX3B
hsa-miR-200b-3p	ZNF711
hsa-miR-200b-3p	PROK2
hsa-miR-200b-3p	ELF2
hsa-miR-200b-3p	UBE2R2
hsa-miR-200b-3p	SLC23A2
hsa-miR-200b-3p	HMGB3
hsa-miR-200b-3p	ERAP2
hsa-miR-200b-3p	ADAM19
hsa-miR-200b-3p	SLC7A11
hsa-miR-200b-3p	NPEPPS
hsa-miR-200b-3p	PARK2
hsa-miR-200b-3p	KIAA0947
hsa-miR-200b-3p	ACVR1B
hsa-miR-200b-3p	CTDSPL2
hsa-miR-200b-3p	IRF4
hsa-miR-200b-3p	ZNF192
hsa-miR-200b-3p	CNOT6L
hsa-miR-200b-3p	OSBPL8
hsa-miR-200b-3p	HMBOX1
hsa-miR-200b-3p	EPDR1
hsa-miR-200b-3p	SLC2A3
hsa-miR-200b-3p	C6orf120
hsa-miR-200b-3p	MBIP
hsa-miR-200b-3p	MDM2
hsa-miR-200b-3p	PRKAR1A
hsa-miR-200b-3p	C19orf54
hsa-miR-200b-3p	ATMIN
hsa-miR-200b-3p	BHLHE22
hsa-miR-200b-3p	ATAD2
hsa-miR-200b-3p	FAM175A
hsa-miR-200b-3p	C3orf64
hsa-miR-200b-3p	C1orf96
hsa-miR-200b-3p	LRRC42
hsa-miR-200b-3p	TADA2B
hsa-miR-200b-3p	CA13
hsa-miR-200b-3p	PHC3
hsa-miR-200b-3p	ZBTB8A
hsa-miR-200b-3p	KCNH5
hsa-miR-200b-3p	AFF1
hsa-miR-200b-3p	UXS1
hsa-miR-200b-3p	KLHL20
hsa-miR-200b-3p	SLC31A1
hsa-miR-200b-3p	CDKN2AIP
hsa-miR-200b-3p	MALT1
hsa-miR-200b-3p	THRAP1
hsa-miR-200b-3p	DNA2
hsa-miR-200b-3p	NRG1
hsa-miR-200b-3p	TERF1
hsa-miR-200b-3p	SETD8
hsa-miR-200b-3p	TMEM43
hsa-miR-200b-3p	WDTC1
hsa-miR-200b-3p	UBE4A
hsa-miR-200b-3p	RKHD3
hsa-miR-200b-3p	SCHIP1
hsa-miR-200b-3p	ENSA
hsa-miR-200b-3p	NEGR1
hsa-miR-200b-3p	FAM81A
hsa-miR-200b-3p	YY1
hsa-miR-200b-3p	LAMC1
hsa-miR-200b-3p	HSPA12A
hsa-miR-200b-3p	ETS1
hsa-miR-200b-3p	EWSR1
hsa-miR-200b-3p	SMC1A
hsa-miR-200b-3p	TSTD2
hsa-miR-200b-3p	C18orf54
hsa-miR-200b-3p	EHD1
hsa-miR-200b-3p	IKIP
hsa-miR-200b-3p	SETD3
hsa-miR-200b-3p	DDX60
hsa-miR-200b-3p	REV1
hsa-miR-200b-3p	NDUFA8
hsa-miR-200b-3p	STRADB
hsa-miR-200b-3p	KCMF1
hsa-miR-200b-3p	ZC3H12C
hsa-miR-200b-3p	MXD3
hsa-miR-200b-3p	HOXA13
hsa-miR-200b-3p	PDE7B
hsa-miR-200b-3p	HEY1
hsa-miR-200b-3p	PPP2R5A
hsa-miR-200b-3p	FBXO28
hsa-miR-200b-3p	WIPF1
hsa-miR-200b-3p	DCAF10
hsa-miR-200b-3p	ZNF182
hsa-miR-200b-3p	TXNDC15
hsa-miR-200b-3p	TRIM33
hsa-miR-200b-3p	APAF1
hsa-miR-200b-3p	SUSD5
hsa-miR-200b-3p	SQLE
hsa-miR-200b-3p	CAST
hsa-miR-200b-3p	EIF5B
hsa-miR-200b-3p	TCF4
hsa-miR-200b-3p	GPR107
hsa-miR-200b-3p	MMD
hsa-miR-200b-3p	MTCH2
hsa-miR-200b-3p	GOLGA7
hsa-miR-200b-3p	KDELC2
hsa-miR-200b-3p	FNDC3B
hsa-miR-200b-3p	DAG1
hsa-miR-200b-3p	KLHL13
hsa-miR-200b-3p	TMEM20
hsa-miR-200b-3p	ASAP1
hsa-miR-200b-3p	BAZ1A
hsa-miR-200b-3p	CCDC91
hsa-miR-200b-3p	RIMS3
hsa-miR-200b-3p	FNTB
hsa-miR-200b-3p	DHX29
hsa-miR-200b-3p	USP15
hsa-miR-200b-3p	SCPEP1
hsa-miR-200b-3p	E2F3
hsa-miR-200b-3p	ATP11B
hsa-miR-200b-3p	C14orf43
hsa-miR-200b-3p	MED13
hsa-miR-200b-3p	BOD1L
hsa-miR-200b-3p	FOXG1
hsa-miR-200b-3p	PI4KB
hsa-miR-200b-3p	SLC25A4
hsa-miR-200b-3p	RAB23
hsa-miR-200b-3p	DUSP1
hsa-miR-200b-3p	CPEB2
hsa-miR-200b-3p	FNDC3A
hsa-miR-200b-3p	SATB2
hsa-miR-200b-3p	AICDA
hsa-miR-200b-3p	TPD52
hsa-miR-200b-3p	C9orf5
hsa-miR-200b-3p	CDC14A
hsa-miR-200b-3p	GRAMD1B
hsa-miR-200b-3p	DCAF8
hsa-miR-200b-3p	PRKAB1
hsa-miR-200b-3p	FOXN2
hsa-miR-200b-3p	TMEM123
hsa-miR-200b-3p	AP1S2
hsa-miR-200b-3p	USP47
hsa-miR-200b-3p	VTI1A
hsa-miR-200b-3p	PIKFYVE
hsa-miR-200b-3p	PIP4K2A
hsa-miR-200b-3p	RERE
hsa-miR-200b-3p	HNRPU
hsa-miR-200b-3p	RNF13
hsa-miR-200b-3p	METTL7A
hsa-miR-200b-3p	MAP4K3
hsa-miR-200b-3p	ZCCHC11
hsa-miR-200b-3p	CLEC2D
hsa-miR-200b-3p	SMAD5
hsa-miR-200b-3p	CXADR
hsa-miR-200b-3p	MTDH
hsa-miR-200b-3p	TFAP2A
hsa-miR-200b-3p	DOPEY1
hsa-miR-200b-3p	SRGAP1
hsa-miR-200b-3p	CCNA2
hsa-miR-200b-3p	YWHAQ
hsa-miR-200b-3p	PPP2R5C
hsa-miR-200b-3p	FLJ11021
hsa-miR-200b-3p	ZNF483
hsa-miR-200b-3p	ALG8
hsa-miR-200b-3p	UBE2D2
hsa-miR-200b-3p	PJA2
hsa-miR-200b-3p	SMCHD1
hsa-miR-200b-3p	AASDHPPT
hsa-miR-200b-3p	HS2ST1
hsa-miR-200b-3p	FOXF2
hsa-miR-200b-3p	MYOF
hsa-miR-200b-3p	THAP5
hsa-miR-200b-3p	USP12
hsa-miR-200b-3p	NUDT4
hsa-miR-200b-3p	PAFAH1B2
hsa-miR-200b-3p	HERC4
hsa-miR-200b-3p	IQCJ-SCHIP1
hsa-miR-200b-3p	DPY19L3
hsa-miR-200b-3p	G2E3
hsa-miR-200b-3p	ZBTB8
hsa-miR-200b-3p	PHF14
hsa-miR-200b-3p	MARK3
hsa-miR-200b-3p	BAZ2B
hsa-miR-200b-3p	SYAP1
hsa-miR-200b-3p	CPNE2
hsa-miR-200b-3p	GTPBP10
hsa-miR-200b-3p	MXD4
hsa-miR-200b-3p	UTP23
hsa-miR-200b-3p	TMEM181
hsa-miR-200b-3p	ARV1
hsa-miR-200b-3p	USP33
hsa-miR-200b-3p	GNPDA1
hsa-miR-200b-3p	BIRC4
hsa-miR-200b-3p	HMGN3
hsa-miR-200b-3p	CXorf23
hsa-miR-200b-3p	TTC33
hsa-miR-200b-3p	BACH2
hsa-miR-200b-3p	DHX9
hsa-miR-200b-3p	PDE4B
hsa-miR-200b-3p	PICALM
hsa-miR-200b-3p	GLS
hsa-miR-200b-3p	TRIB2
hsa-miR-200b-3p	PRPS1
hsa-miR-200b-3p	ZNF642
hsa-miR-200b-3p	KLF13
hsa-miR-200b-3p	KANK1
hsa-miR-200b-3p	MCC
hsa-miR-200b-3p	SNORD45C
hsa-miR-200b-3p	PMM1
hsa-miR-200b-3p	C19orf12
hsa-miR-200b-3p	KLF9
hsa-miR-200b-3p	CRYL1
hsa-miR-200b-3p	FKBP9
hsa-miR-200b-3p	C10orf119
hsa-miR-200b-3p	MYD88
hsa-miR-200b-3p	HDAC4
hsa-miR-200b-3p	MAGI1
hsa-miR-200b-3p	PITPNA
hsa-miR-200b-3p	TMEM22
hsa-miR-200b-3p	PPM1F
hsa-miR-200b-3p	OGT
hsa-miR-200b-3p	ELMO2
hsa-miR-200b-3p	FER
hsa-miR-200b-3p	NOD1
hsa-miR-200b-3p	ST7
hsa-miR-200b-3p	CXCR7
hsa-miR-200b-3p	PCMT1
hsa-miR-200b-3p	SNX3
hsa-miR-200b-3p	LOC345643
hsa-miR-200b-3p	DLST
hsa-miR-200b-3p	G3BP2
hsa-miR-200b-3p	SS18
hsa-miR-200b-3p	C13orf1
hsa-miR-200b-3p	TPST1
hsa-miR-200b-3p	DIP2A
hsa-miR-200b-3p	GLUD1
hsa-miR-200b-3p	TMEM237
hsa-miR-200b-3p	PTEN
hsa-miR-200b-3p	PPP6C
hsa-miR-200b-3p	ZNF280D
hsa-miR-200b-3p	MGAT3
hsa-miR-200b-3p	CCT6A
hsa-miR-200b-3p	CPOX
hsa-miR-200b-3p	PRDX2
hsa-miR-200b-3p	TCEB1
hsa-miR-200b-3p	RANBP9
hsa-miR-200b-3p	ARID4A
hsa-miR-200b-3p	PIGA
hsa-miR-200b-3p	ALS2CR8
hsa-miR-200b-3p	PTPN21
hsa-miR-200b-3p	IQSEC1
hsa-miR-200b-3p	SOCS6
hsa-miR-200b-3p	B3GALTL
hsa-miR-200b-3p	LPAR1
hsa-miR-200b-3p	SLC35A1
hsa-miR-200b-3p	TMEM113
hsa-miR-200b-3p	ZNF608
hsa-miR-200b-3p	TMEM41A
hsa-miR-200b-3p	CCNDBP1
hsa-miR-200b-3p	EFR3A
hsa-miR-200b-3p	SFRS13A
hsa-miR-200b-3p	RPL23
hsa-miR-200b-3p	ATXN1L
hsa-miR-200b-3p	TMEM55A
hsa-miR-200b-3p	SLC39A8
hsa-miR-200b-3p	DOCK10
hsa-miR-200b-3p	GABARAPL2
hsa-miR-200b-3p	CHCHD1
hsa-miR-200b-3p	LOC26010
hsa-miR-200b-3p	LIMK1
hsa-miR-200b-3p	PTP4A1
hsa-miR-200b-3p	RMND5A
hsa-miR-200b-3p	RIF1
hsa-miR-200b-3p	AXIN2
hsa-miR-200b-3p	FN1
hsa-miR-200b-3p	LATS2
hsa-miR-200b-3p	RAPGEF1
hsa-miR-200b-3p	ZCCHC24
hsa-miR-200b-3p	TOP1
hsa-miR-200b-3p	HYOU1
hsa-miR-200b-3p	SIPA1L2
hsa-miR-200b-3p	INPP4A
hsa-miR-200b-3p	ANKRD25
hsa-miR-200b-3p	SYT4
hsa-miR-200b-3p	EBF3
hsa-miR-200b-3p	PHTF2
hsa-miR-200b-3p	HIPK2
hsa-miR-200b-3p	C18orf55
hsa-miR-200b-3p	DCP2
hsa-miR-200b-3p	FBXL19
hsa-miR-200b-3p	RKHD2
hsa-miR-200b-3p	FAM13B
[truncated: 421,976 more rows]
