# Supplementary material for: Identification of Potential Prognostic Biomarkers for Breast Cancer Based on lncRNA-TF-Associated ceRNA Network and Functional Module
Source: Biomed Res Int. 2020 Jul 28;2020:5257896. doi: 10.1155/2020/5257896 (PMC7411464; doi:10.1155/2020/5257896)
Supplement: Supplementary 4 — Supplementary Table S4: raw data for hypergeometric results between lncRNAs and TFs. [file 5257896.f4.csv]

LNCRNA	TF	intersection	p-value
RP11-206L10	MDM4	4	0.00288168
RP11-206L10	ZBTB20	2	0.008202338
RP11-206L10	MATR3	10	2.73E-13
RP11-206L10	ZNF451	10	6.25E-12
RP11-206L10	DMTF1	5	4.80E-05
RP11-206L10	HMBOX1	9	1.90E-10
RP11-206L10	ZNF26	2	0.002741686
RP11-206L10	ZNF410	2	0.045253803
RP11-206L10	NFAT5	8	1.61E-08
RP11-206L10	PIAS2	4	5.36E-06
RP11-206L10	ZNF236	4	0.002620873
RP11-206L10	ZNF564	2	0.005382535
RP11-206L10	ZNF493	7	7.57E-14
RP11-206L10	ZNF382	2	0.000747132
RP11-174G17	ZNF410	2	0.001777802
RP1-184J9	RUNX1T1	2	0.045328277
RP1-184J9	HMGA2	10	5.58E-12
RP11-415J8	ZNF124	4	4.35E-07
RP11-415J8	MATR3	4	2.37E-05
RP11-415J8	ZNF26	1	0.039918678
RP11-415J8	NFAT5	2	0.031041823
RP11-415J8	ZNF573	1	0.010781575
RP4-665N4	SHPRH	3	1.56E-06
RP4-665N4	HMBOX1	3	5.27E-05
RP4-665N4	ZNF519	3	3.47E-09
RP4-802A10	MDM4	1	0.045595054
RP4-802A10	DMTF1	1	0.032071097
RP4-802A10	RUNX1T1	1	0.028979907
RP4-802A10	YAF2	1	0.02202473
RP4-802A10	ZNF26	1	0.005795981
RP5-837I24	RUNX1T1	1	0.028979907
RP5-837I24	MEIS2	1	0.035935085
RP4-717I23	MDM4	3	0.006345185
RP4-717I23	ZBTB20	2	0.003346689
RP4-717I23	MATR3	3	0.001870111
RP4-714D9	MATR3	7	1.23E-10
RP4-714D9	ZNF26	1	0.045498384
RP4-714D9	RORA	7	7.69E-09
RP4-714D9	ZNF493	6	2.02E-13
RP11-421L21	ZNF124	2	0.004158159
RP11-421L21	MATR3	5	2.35E-06
RP11-284N8	EOMES	2	0.003123674
RP11-284N8	HCLS1	2	0.000162095
RP11-284N8	IRF4	6	5.60E-06
RP11-284N8	PRDM1	4	0.001617892
RP11-284N8	TFEC	2	0.003529228
RP11-284N8	POU2AF1	3	0.000116134
RP11-284N8	POU2F2	2	0.01015206
RP11-552M11	SHPRH	2	0.01155574
RUSC1-AS1	GABPB2	2	0.003831288
RP11-267N12	RBM15	7	6.05E-15
RP11-267N12	ZBTB37	7	1.36E-13
RP11-267N12	MDM4	8	1.48E-11
RP11-267N12	HMBOX1	7	7.01E-10
RP11-267N12	ZNF410	7	3.18E-11
RP11-46A10	HMBOX1	3	0.002567865
RP11-46A10	ZNF26	3	8.68E-06
RP11-46A10	ZNF236	5	8.00E-06
RP11-378J18	SHPRH	1	0.011978362
RP11-518L10	MDM4	2	0.002062088
RP11-342K6	RBM15	4	1.76E-05
RP11-342K6	MDM4	8	1.83E-06
RP11-342K6	MATR3	4	0.002950917
RP11-342K6	ZNF451	10	1.74E-09
RP11-342K6	DMTF1	8	1.16E-07
RP11-342K6	HMBOX1	4	0.007045141
RP11-342K6	RUNX1T1	8	5.13E-08
RP11-342K6	ZNF248	5	4.72E-05
RP11-342K6	YAF2	13	1.20E-17
RP11-342K6	ZNF26	3	0.000196944
RP11-342K6	NFAT5	8	8.56E-07
RP11-342K6	ZNF236	10	4.76E-09
RP11-342K6	ZNF564	6	6.58E-09
RP11-181E10	RBM15	1	0.032082945
RP11-181E10	HMBOX1	2	0.008103139
RP11-181E10	ZNF573	1	0.006171632
RP11-181E10	ZNF546	1	0.006171632
AC016683	SHPRH	1	0.011978362
AC093375	MATR3	2	0.002571495
AC009299	ZNF124	4	1.54E-06
AC009299	MATR3	6	4.47E-08
AC009299	RORA	5	4.10E-05
AC009299	NFAT5	3	0.004811657
AC009299	ZNF573	1	0.013845948
RP11-65L3	MDM4	1	0.045595054
RP11-65L3	BAZ2B	1	0.042117465
RP11-65L3	MATR3	1	0.029752705
RP11-65L3	ZNF483	1	0.011591963
AC007038	MDM4	10	2.67E-14
AC007038	ELK4	2	0.038694532
AC007038	REL	1	0.034295436
AC007038	ZBTB20	7	5.06E-13
AC007038	MATR3	7	1.75E-09
AC007038	ZNF451	9	1.88E-12
AC007038	HMBOX1	5	1.53E-05
AC007038	ERCC6	2	0.011659879
AC007038	PIAS2	3	8.06E-05
AC007038	ZNF236	7	3.07E-08
RP11-566E18	APC	2	0.021944861
RP11-566E18	ZNF510	1	0.029409674
MAGI1-IT1	ZBTB37	19	5.20E-39
MAGI1-IT1	MDM4	20	2.94E-28
MAGI1-IT1	ZNF410	19	3.18E-31
MAGI1-IT1	RORA	20	7.48E-27
AC092535	HMGA2	4	0.007485327
AC078852	ZNF410	4	3.41E-07
RP11-148B6	MDM4	3	0.000864353
RP11-148B6	BAZ2B	3	0.000683498
RP11-148B6	MATR3	2	0.008244453
RP11-148B6	SHPRH	3	1.53E-05
RP11-148B6	DMTF1	3	0.00030381
RP11-148B6	ZNF26	2	0.000310517
RP11-148B6	RORA	5	3.88E-07
RP11-148B6	NFAT5	2	0.015605988
RP11-425I13	ZBTB20	1	0.039606557
CTD-2083E4	SHPRH	1	0.011978362
CTD-2083E4	YAF2	1	0.02202473
CTD-2083E4	ZNF410	1	0.024729521
CTD-2083E4	ZNF91	1	0.011205564
CTD-2353F22	FOXP2	3	9.01E-05
RP11-141O11	HOXD11	1	0.013864651
RP11-549J18	MDM4	6	5.35E-08
RP11-549J18	ZBTB20	2	0.001976552
RP11-549J18	PURA	7	2.79E-09
RP11-549J18	DMTF1	6	6.21E-09
RP11-549J18	HMBOX1	7	9.04E-11
RP11-549J18	ZNF410	6	1.24E-09
RP11-549J18	RORA	6	1.33E-07
RP11-549J18	ZNF91	6	7.95E-12
RP11-43D2	MDM4	7	3.45E-10
RP11-43D2	ZBTB20	3	3.07E-05
RP11-43D2	HMBOX1	6	1.72E-08
RP11-43D2	ZNF410	6	1.24E-09
RP11-43D2	ZNF91	6	7.95E-12
AC034220	ANKRA2	6	1.99E-10
CTB-89H12	ZBTB37	8	7.21E-08
CTB-89H12	MDM4	34	1.36E-35
CTB-89H12	BAZ2B	30	4.71E-30
CTB-89H12	ZBTB20	5	0.00011717
CTB-89H12	MATR3	12	1.26E-08
CTB-89H12	PURA	44	6.01E-49
CTB-89H12	SHPRH	4	0.002843091
CTB-89H12	DMTF1	29	2.09E-32
CTB-89H12	HMBOX1	25	1.35E-23
CTB-89H12	ZNF26	4	0.000155719
CTB-89H12	ZNF410	15	2.31E-13
CTB-89H12	RORA	44	3.79E-52
CTB-89H12	ZNF91	13	7.12E-16
CTB-89H12	ZNF546	2	0.002227902
CTB-89H12	ZNF586	4	0.000625519
CTB-89H12	BRWD1	31	7.95E-29
RP11-175K6	EPAS1	7	4.81E-13
RP11-175K6	PPARG	7	2.71E-11
RP11-175K6	HABP4	7	1.01E-12
RP11-175K6	TEAD1	4	0.000129326
RP11-175K6	EZH1	7	7.57E-13
RP11-175K6	ERG	6	5.39E-10
CTC-308K20	ZNF26	1	0.011560597
RP11-405O10	RREB1	3	0.002918597
HCG11	KLF11	7	7.38E-08
RP11-457M11	ZNF410	11	1.10E-15
HCG18	RBM15	12	6.58E-14
HCG18	ZBTB37	23	2.94E-30
HCG18	MDM4	45	3.84E-43
HCG18	BAZ2B	22	1.82E-13
HCG18	NR2C2	41	4.55E-44
HCG18	ZBTB20	6	9.45E-05
HCG18	MATR3	10	8.25E-05
HCG18	ZNF451	10	0.001004274
HCG18	SHPRH	5	0.00212675
HCG18	DMTF1	38	2.20E-39
HCG18	HMBOX1	31	1.23E-25
HCG18	ZNF248	15	1.19E-11
HCG18	ZNF410	30	6.07E-31
HCG18	NFAT5	30	5.25E-23
HCG18	ZNF236	37	2.26E-31
HCP5	STAT1	6	9.30E-06
RP11-79N23	ZNF451	1	0.040185471
RP11-79N23	ZNF26	1	0.005795981
RP1-102H19	MDM4	2	0.002062088
RP1-102H19	PURA	2	0.003705067
RP1-102H19	RORA	2	0.002782908
RP1-102H19	ZNF91	2	0.000121282
RP1-102H19	ZNF571	2	4.57E-05
RP1-20N2	MDM4	3	0.000864353
RP1-20N2	BAZ2B	4	1.44E-05
RP1-20N2	ZNF141	1	0.003861
RP1-20N2	RORA	3	0.001342156
RP1-20N2	ZNF236	3	0.000800989
RP1-20N2	ZNF493	2	0.000269324
RP1-20N2	ZNF91	2	0.001187682
HOTAIRM1	HOXA3	4	1.20E-05
HOTAIRM1	HOXA5	4	1.36E-05
HOXA-AS2	HOXA3	19	2.28E-32
AC007036	SHPRH	3	1.56E-06
AC007036	HMBOX1	3	5.27E-05
AC007036	ZNF519	3	3.47E-09
AC005154	MDM4	12	2.14E-07
AC005154	BAZ2B	12	8.72E-08
AC005154	ZBTB20	3	0.008513807
AC005154	SHPRH	7	4.12E-07
AC005154	DMTF1	8	4.63E-05
AC005154	HMBOX1	18	1.48E-15
AC005154	ZNF26	3	0.001692198
AC005154	ZNF410	7	6.48E-05
AC005154	CHD2	11	2.41E-08
AC005154	ZNF236	12	1.60E-07
GS1-124K5	ZBTB20	2	0.003346689
GS1-124K5	ZNF410	6	1.43E-08
GS1-124K5	ZNF519	3	2.90E-07
AC000120	MDM4	7	2.25E-07
AC000120	ZNF124	4	5.92E-06
AC000120	BAZ2B	6	3.66E-06
AC000120	MATR3	6	4.58E-07
AC000120	ZNF451	3	0.010643334
AC000120	SHPRH	2	0.008506928
AC000120	ZNF117	2	0.000292699
AC000120	DMTF1	4	0.000400327
AC000120	HMBOX1	3	0.009031767
AC000120	ZNF26	2	0.002001852
AC000120	NFAT5	4	0.001058039
AC000120	ZNF519	1	0.022987529
AC000120	ZNF493	2	0.001739421
AC000120	ZNF91	4	5.92E-06
AC007566	ZBTB20	1	0.010046368
AC007566	DMTF1	1	0.032071097
AC058791	HOXD3	2	0.000476988
RP11-115C21	MDM4	2	0.006001266
RP11-115C21	ZBTB20	2	0.000289453
RP11-115C21	MATR3	3	2.53E-05
RP11-115C21	PURA	3	0.000223508
RP11-115C21	ZNF26	1	0.017294004
RP11-115C21	RORA	2	0.008058164
AF131215	ZBTB20	1	0.010046368
AF131215	HMBOX1	1	0.037867079
AF131215	ZNF410	1	0.024729521
RP11-102F4	RUNX1T1	5	0.00011409
RP11-102F4	HMGA2	16	1.36E-19
RP11-102F4	MEIS2	5	0.000318123
RP11-37B2	MDM4	2	0.0188319
RP11-37B2	MATR3	3	0.000242737
RP11-37B2	ZNF451	2	0.01477408
RP11-37B2	ERCC6	3	4.48E-05
RP11-37B2	NFAT5	3	0.000646995
RP11-37B2	PIAS2	2	0.000810534
GS1-251I9	MATR3	6	4.58E-07
KB-431C1	RBM15	1	0.039949144
KB-431C1	MDM4	3	0.000864353
KB-431C1	MATR3	2	0.008244453
KB-431C1	ZNF493	1	0.026777334
KB-431C1	ZNF546	1	0.007710066
RP11-383J24	ZBTB20	2	0.002619137
RP11-382A18	ZNF382	1	0.00309119
RP11-509J21	ELK4	19	4.73E-30
RP11-331F9	SHPRH	1	0.035519924
RP11-331F9	ZNF26	3	1.58E-07
RP11-397D12	ZNF410	4	3.41E-07
RP11-197P3	ZNF566	13	8.07E-16
RP11-276H19	NR3C2	3	0.002736847
RP11-276H19	HOXA4	3	6.47E-05
RP11-276H19	ARID5B	3	0.012744238
RP11-492E3	MDM4	13	1.97E-10
RP11-492E3	ZNF410	18	1.49E-22
SNHG7	REXO4	5	1.55E-07
RP11-229P13	ZNF519	1	0.001931994
RP3-323N1	ZBTB20	1	0.039606557
RP3-323N1	ZNF382	1	0.012314652
RP11-119F19	NFAT5	5	5.59E-06
RP11-119K6	MDM4	1	0.045595054
RP11-119K6	MATR3	1	0.029752705
RP11-119K6	ZNF519	1	0.001931994
RP11-57H14	SHPRH	2	0.000821027
RP11-57H14	ZNF564	2	0.000372714
EMX2OS	KLF4	1	0.034003091
EMX2OS	EBF3	1	0.021251932
KCNQ1OT1	ZBTB37	5	0.003598916
KCNQ1OT1	MDM4	44	1.94E-38
KCNQ1OT1	BAZ2B	29	8.72E-20
KCNQ1OT1	ZBTB20	10	4.71E-09
KCNQ1OT1	MATR3	18	2.56E-11
KCNQ1OT1	SHPRH	6	0.000514113
KCNQ1OT1	HMBOX1	31	9.25E-24
KCNQ1OT1	ZNF483	8	4.49E-06
KCNQ1OT1	ZNF410	22	1.12E-17
KCNQ1OT1	RORA	33	3.85E-21
KCNQ1OT1	ZNF519	4	6.37E-06
KCNQ1OT1	ZNF564	3	0.033405156
KCNQ1OT1	ZNF91	4	0.016078223
CTD-2516F10	ZBTB20	2	0.002619137
CTD-2516F10	HMBOX1	6	6.68E-08
RP11-5L12	MDM4	1	0.045595054
RP11-5L12	BAZ2B	1	0.042117465
RP11-5L12	MATR3	1	0.029752705
RP11-5L12	ZNF483	1	0.011591963
RP11-5L12	ZNF236	1	0.044435858
AP000662	MDM4	1	0.045595054
AP000662	ZBTB20	1	0.010046368
RP11-21A7A	MATR3	2	0.000874065
RP11-21A7A	ZNF26	1	0.011560597
RP11-21A7A	ZNF410	1	0.048856815
RP11-21A7A	ZNF519	1	0.003861
RP11-21A7A	ZNF586	1	0.016166016
NEAT1	MDM4	28	4.75E-19
NEAT1	ZBTB20	5	0.000983099
NEAT1	MATR3	18	3.67E-12
NEAT1	ZNF26	4	0.000891746
NEAT1	ZNF410	22	8.72E-19
NEAT1	ZNF573	3	0.000111345
MALAT1	ZBTB37	10	3.47E-07
MALAT1	MDM4	45	4.25E-34
MALAT1	BAZ2B	53	7.47E-48
MALAT1	ZBTB20	8	8.35E-06
MALAT1	ZNF141	2	0.001890322
MALAT1	MATR3	34	6.13E-28
MALAT1	SHPRH	15	2.64E-13
MALAT1	HMBOX1	38	8.90E-29
MALAT1	ZNF483	15	1.42E-13
MALAT1	ZNF26	9	1.69E-09
MALAT1	ZNF410	22	2.77E-15
MALAT1	ZNF236	46	4.61E-36
MALAT1	ZNF564	8	1.31E-06
MALAT1	ZNF91	13	3.97E-11
MALAT1	ZNF573	2	0.010703177
MALAT1	ZNF586	10	3.99E-09
RP11-658F2	HMBOX1	3	5.27E-05
SCARNA9	MDM4	2	0.048203169
SCARNA9	ZNF124	2	0.003256712
SCARNA9	BAZ2B	5	6.13E-06
SCARNA9	MATR3	3	0.001273931
SCARNA9	NFAT5	3	0.003306647
RP11-819C21	MATR3	3	0.03270937
RP11-819C21	PURA	14	6.56E-12
RP11-819C21	ZDHHC21	17	6.45E-23
RP11-819C21	NFAT5	11	5.75E-10
RP11-730K11	MDM4	4	4.12E-06
RP11-730K11	ZNF410	4	3.41E-07
RP11-174G6	SHPRH	1	0.023817817
RP11-282K24	MDM4	6	5.95E-07
RP11-282K24	ZBTB20	4	9.76E-07
RP11-282K24	DMTF1	6	7.07E-08
RP11-282K24	RUNX1T1	6	3.80E-08
RP11-282K24	ZNF410	6	1.43E-08
RP11-282K24	PIAS2	9	9.24E-20
RP11-282K24	ZNF91	6	9.40E-11
RP11-923I11	ZBTB20	3	0.001788918
RP11-923I11	RUNX1T1	19	8.30E-26
RP11-923I11	HMGA2	23	9.05E-29
HOTAIR	HOXC11	4	0.001004129
RP11-478C19	ZBTB37	3	0.004164273
RP11-478C19	MDM4	8	2.13E-05
RP11-478C19	MATR3	10	2.56E-09
RP11-290D2	MDM4	11	1.12E-15
RP11-290D2	ZBTB20	7	1.38E-12
RP11-290D2	ZNF141	1	0.008484343
RP11-290D2	MATR3	7	4.71E-09
RP11-290D2	HMBOX1	5	2.71E-05
RP11-290D2	RORA	4	0.001854049
RP11-290D2	PIAS2	2	0.004308717
DLEU2	MDM4	7	3.45E-10
DLEU2	ZNF124	2	0.002459603
DLEU2	YAF2	5	8.82E-08
DLEU2	ZNF91	2	0.002459603
RP11-29G8	ZNF410	9	4.04E-13
RP11-29G8	ZNF573	1	0.018429151
MIR17HG	ZNF566	15	5.31E-18
RP11-902B17	ZBTB20	1	0.049269958
RP11-902B17	MATR3	4	3.55E-06
RP11-902B17	HMBOX1	3	0.000498451
RP11-902B17	RORA	4	3.61E-05
RP11-902B17	NFAT5	3	0.000646995
AC005519	SHPRH	1	0.011978362
RP11-33N16	MDM4	2	0.002062088
RP11-33N16	MATR3	2	0.000874065
RP11-33N16	HMBOX1	2	0.001419832
MEG3	HMGA2	4	6.68E-06
MEG8	FOXP2	6	7.54E-09
MEG8	RUNX1T1	6	4.85E-10
MEG8	HMGA2	6	1.65E-08
MEG8	MEIS2	3	0.000830867
RP11-73M18	ZBTB37	14	5.22E-21
RP11-73M18	BAZ2B	8	2.07E-05
RP11-73M18	NR2C2	17	9.84E-19
RP11-73M18	ZBTB20	8	1.61E-10
RP11-73M18	MATR3	10	5.59E-09
RP11-73M18	HMBOX1	18	3.11E-19
RP11-73M18	ZNF410	16	3.00E-19
RP11-73M18	RORA	20	1.44E-19
RP11-73M18	CHD2	8	1.62E-06
RP11-73M18	NFAT5	8	1.80E-05
RP11-73M18	ZNF573	1	0.045593797
RP11-701H24	SHPRH	3	0.028108286
RP11-701H24	ZNF236	30	1.42E-27
RP11-64K12	ZBTB20	4	7.49E-06
RP11-64K12	SHPRH	4	1.55E-05
RP11-64K12	HMBOX1	8	7.92E-09
RP11-64K12	ZNF410	7	1.22E-08
RP11-64K12	ZNF236	8	2.87E-08
RP11-540O11	MDM4	9	6.08E-12
RP11-540O11	ZNF124	2	0.00516167
RP11-540O11	BAZ2B	3	0.007024171
RP11-540O11	ZBTB20	2	0.004157567
RP11-540O11	ZNF141	1	0.007714533
RP11-540O11	DMTF1	6	1.72E-07
RP11-540O11	HMBOX1	7	9.87E-09
RP11-540O11	YAF2	2	0.019149885
RP11-540O11	ZNF410	6	3.51E-08
RP11-540O11	RORA	9	2.42E-11
RP11-540O11	PIAS2	6	6.65E-11
RP11-540O11	ZNF493	2	0.001193334
RP11-540O11	ZNF91	8	3.86E-15
RP11-151N17	ZBTB37	1	0.047086222
RP11-151N17	MDM4	4	4.12E-06
RP11-151N17	ZNF124	2	0.000717598
RP11-151N17	BAZ2B	4	2.98E-06
RP11-151N17	ZNF141	1	0.003089398
RP11-151N17	YAF2	2	0.002780091
RP11-151N17	RORA	4	7.53E-06
RP11-151N17	ZNF236	2	0.011075401
RP11-151N17	ZNF493	2	0.000162095
RP11-151N17	ZNF91	2	0.000717598
RP11-154J22	MDM4	1	0.045595054
RP11-429D19	RBM15	7	5.54E-11
RP11-429D19	HMBOX1	19	3.11E-27
RP11-429D19	ZNF410	19	3.18E-31
RP11-1006G14	MATR3	4	7.26E-07
RP11-1006G14	ZNF410	4	3.41E-07
RP11-1006G14	ZNF236	4	3.71E-06
RP11-1006G14	ZNF586	2	0.000372714
RP11-10O17	MDM4	2	0.011644881
RP11-10O17	MATR3	2	0.005043766
RP11-10O17	SHPRH	2	0.000821027
RP11-10O17	ZNF236	2	0.011075401
RP11-10O17	ZNF91	1	0.044099619
RP11-797A18	YAF2	1	0.02202473
RP11-752G15	ZNF26	1	0.011560597
RP11-752G15	ZNF410	1	0.048856815
RP11-752G15	ZNF91	1	0.022289847
CTD-2270L9	MDM4	12	1.46E-10
CTD-2270L9	BAZ2B	10	2.24E-08
CTD-2270L9	MATR3	5	0.000681883
CTD-2270L9	DMTF1	9	3.12E-08
CTD-2270L9	HMBOX1	9	1.37E-07
CTD-2270L9	ZNF410	14	2.60E-17
CTD-2270L9	RORA	10	2.07E-07
CTD-2270L9	ZNF236	6	0.000598135
CTD-2270L9	ZNF91	2	0.031017756
CTD-2270L9	ZNF586	2	0.016816826
CTD-2574D22	MDM4	8	1.28E-10
CTD-2574D22	ZBTB20	2	0.003346689
CTD-2574D22	DMTF1	8	7.00E-12
CTD-2574D22	ZNF410	6	1.43E-08
CTD-2574D22	ZNF91	8	7.77E-16
RP11-452L6	ZNF747	2	0.002357907
RP5-991G20	MDM4	1	0.045595054
RP5-991G20	MATR3	1	0.029752705
RP5-991G20	SHPRH	1	0.011978362
RP11-264L1	ZNF410	3	5.67E-05
RP11-18F14	BAZ2B	4	0.000318755
RP11-18F14	MATR3	4	8.16E-05
RP11-18F14	SHPRH	5	2.15E-08
RP11-18F14	HMBOX1	3	0.003746486
RP11-18F14	ZNF483	5	1.80E-08
RP11-18F14	ZNF91	2	0.004158159
FENDRR	FOXF1	8	3.20E-10
RP11-676J12	ZNF124	2	0.000121282
RP11-676J12	DMTF1	2	0.001016556
RP11-676J12	ZNF571	2	4.57E-05
RP1-59D14	HMBOX1	1	0.037867079
RP1-59D14	ZNF483	1	0.011591963
RP1-59D14	YAF2	1	0.02202473
RP1-59D14	ZNF26	1	0.005795981
RP1-59D14	PIAS2	1	0.00927357
RP1-59D14	ZNF564	1	0.008114374
CTC-524C5	DMTF1	1	0.032071097
CTC-524C5	ZNF26	1	0.005795981
AC113189	EDF1	3	1.16E-07
AC113189	ZNF524	3	2.91E-08
RP11-227G15	MDM4	2	0.048203169
RP11-227G15	SHPRH	3	8.37E-05
RP11-227G15	HMBOX1	3	0.002567865
RP5-837J1	SHPRH	3	0.000642761
RP5-837J1	HMBOX1	4	0.001913686
RP5-837J1	ZNF519	3	1.57E-06
RP11-445F12	AATF	1	0.007727975
AC003104	MDM4	8	1.57E-08
AC003104	ZBTB20	4	5.39E-06
AC003104	MATR3	3	0.005842378
AC003104	HMBOX1	7	1.29E-07
AC003104	ZNF410	7	6.20E-09
AC003104	RORA	8	5.19E-08
AC003104	PIAS2	6	5.34E-10
AC003104	ZNF564	2	0.004636227
AC003104	ZNF91	6	1.86E-09
AC003104	ZNF573	1	0.019953329
AC003104	BRWD1	8	3.86E-08
RP1-193H18	EPAS1	2	0.00033696
RP1-193H18	PPARG	2	0.001016556
RP1-193H18	EBF3	2	0.000443604
RP1-193H18	CEBPA	2	0.000188196
CTD-2047H16	MATR3	1	0.029752705
RP11-715F3	MATR3	4	3.55E-06
RP11-21J18	ZBTB20	1	0.029848749
RP11-158H5	ZBTB20	2	9.71E-05
RP11-158H5	ZNF410	1	0.048856815
RP11-158H5	NFAT5	2	0.001694061
RP11-35G9	MDM4	1	0.045595054
RP11-35G9	ZNF26	1	0.005795981
RP11-126O1	MDM4	1	0.045595054
RP11-231E4	MDM4	8	1.57E-08
RP11-231E4	ZNF124	3	0.00033577
RP11-231E4	MATR3	3	0.005842378
RP11-231E4	DMTF1	4	0.000564191
RP11-231E4	ZNF26	2	0.002357907
CTD-2622I13	ZBTB20	1	0.010046368
CTD-2622I13	ZNF410	1	0.024729521
CTD-3252C9	MATR3	1	0.029752705
CTD-2561J22	ZNF124	1	0.044099619
CTD-2561J22	SHPRH	2	0.000821027
CTD-2561J22	ZNF410	2	0.003498873
CTD-2561J22	ZNF91	2	0.000717598
CTB-92J24	ZNF254	4	0.000389156
CTD-2017D11	REL	1	0.003477589
CTD-2017D11	BAZ2B	1	0.042117465
CTD-2017D11	ZNF451	1	0.040185471
CTD-2017D11	NFAT5	1	0.041344668
CTC-459F4	ZBTB20	2	0.006022859
CTC-459F4	MATR3	3	0.004591662
CTC-459F4	SHPRH	2	0.008506928
CTC-459F4	ZNF410	3	0.002706486
CTD-3064H18	MDM4	7	3.68E-08
CTD-3064H18	HMBOX1	3	0.005206037
CTD-3064H18	ZNF571	2	0.001989868
CTD-3064H18	ZNF573	1	0.015375461
CTB-102L5	ZNF410	2	0.000602226
AC084219	ZBTB37	8	1.75E-08
AC084219	MDM4	32	5.70E-36
AC084219	ZNF124	8	9.77E-09
AC084219	BAZ2B	15	5.03E-11
AC084219	ZBTB20	8	3.69E-09
AC084219	MATR3	13	9.14E-11
AC084219	DMTF1	22	4.53E-23
AC084219	HMBOX1	28	2.53E-31
AC084219	ATM	5	2.69E-05
AC084219	ZNF26	5	2.65E-06
AC084219	ZNF410	14	3.29E-13
AC084219	RORA	30	4.22E-30
AC084219	NFAT5	22	2.09E-20
AC084219	PIAS2	9	4.35E-11
AC084219	ZNF564	3	0.004614167
AC084219	ZNF91	10	8.42E-12
AC084219	ZNF571	9	1.74E-12
AC084219	ZNF283	4	4.41E-06
AC084219	ZNF586	9	1.01E-11
AC084219	ZNF81	2	0.046381575
CTD-3138B18	MDM4	14	8.66E-18
CTD-3138B18	HMBOX1	10	2.54E-11
CTD-3138B18	ZNF410	9	1.94E-11
CTD-3138B18	ZNF571	2	0.005176652
A1BG-AS1	ZNF324	1	0.047754436
RP11-227D2	HMGA2	2	0.002622194
RP5-1085F17	MDM4	2	0.027412221
RP5-1085F17	BAZ2B	6	4.88E-09
RP5-1085F17	MATR3	3	0.000475075
RP5-1085F17	ZNF451	2	0.021583823
RP5-1085F17	SHPRH	2	0.002022042
RP5-1085F17	HMBOX1	2	0.019274641
RP5-1085F17	ZNF483	3	2.75E-05
RP5-1085F17	RORA	4	0.000103859
RP5-1085F17	BRWD1	3	0.002316573
RP4-614O4	ZBTB20	3	0.000103174
RP4-614O4	NFAT5	3	0.006668638
RP4-564F22	ZNF26	1	0.034308542
AP001172	DMTF1	2	0.001016556
MIR155HG	GFI1	1	0.030555369
MIR155HG	EOMES	1	0.030555369
AP000265	RBM15	7	7.60E-16
AP001469	ZBTB20	1	0.019995651
AP001469	ZNF571	1	0.013864651
AP000525	HOXD3	2	0.000133596
AP000525	HMGA2	4	3.21E-05
XXbac-B461K10	ZBTB20	4	0.000103115
KB-318B8	MATR3	2	0.002571495
KB-318B8	HMBOX1	3	5.27E-05
KB-318B8	NFAT5	3	6.88E-05
KB-318B8	ZNF519	1	0.005787023
KB-318B8	ZNF417	1	0.045672263
RP1-5O6	MDM4	10	1.08E-08
RP1-5O6	ZNF124	2	0.024382862
RP1-5O6	BAZ2B	11	2.14E-10
RP1-5O6	MATR3	11	4.24E-12
RP1-5O6	HMBOX1	5	0.001108307
RP1-5O6	ZNF410	8	2.18E-08
RNU12	ZNF124	2	0.000717598
CTA-217C2	MATR3	2	0.008244453
CTA-217C2	ZNF235	1	0.003861
RP11-258C19	MDM4	3	0.001671258
RP11-258C19	BDP1	3	0.000357723
RP11-258C19	MATR3	3	0.000475075
RP11-258C19	PURA	3	0.00389535
RP11-258C19	DMTF1	3	0.000593554
RP11-258C19	HMBOX1	2	0.019274641
RP11-258C19	ATM	2	0.001109319
RP11-258C19	ZNF26	1	0.034308542
RP11-258C19	NFAT5	4	3.89E-05
XIST	BAZ2B	78	1.38E-67
XIST	HOXD3	4	0.005200032
XIST	NR2C2	79	6.77E-87
XIST	ZNF445	8	4.54E-07
XIST	ZBTB20	20	4.34E-18
XIST	ZNF141	2	0.006064384
XIST	SHPRH	23	4.55E-20
XIST	DMTF1	73	1.85E-75
XIST	RUNX1T1	68	4.40E-72
XIST	ZNF410	52	5.04E-49
XIST	NFAT5	78	1.20E-68
XIST	ZNF236	83	6.89E-73
XIST	ZNF81	21	2.03E-24
RP3-368A4	MDM4	3	0.033508531
RP3-368A4	ZNF124	3	0.000642717
RP3-368A4	BAZ2B	9	2.69E-09
RP3-368A4	MATR3	7	1.45E-07
RP3-368A4	PURA	5	0.002006061
RP3-368A4	ZNF451	8	5.13E-08
RP3-368A4	DMTF1	3	0.013171817
RP3-368A4	HMBOX1	7	7.80E-07
RP3-368A4	ZDHHC21	6	1.87E-06
RP3-368A4	ATM	2	0.008407187
RP3-368A4	ZNF410	3	0.006418811
RP3-368A4	RORA	11	2.15E-11
RP3-368A4	NFAT5	9	2.27E-09
RP3-368A4	ZNF493	6	5.64E-11
RP3-368A4	BRWD1	3	0.044602381
RP11-761E20	ZBTB20	1	0.010046368
RP11-761E20	MATR3	1	0.029752705
RP11-761E20	SHPRH	1	0.011978362
RP11-761E20	HMBOX1	1	0.037867079
RP11-761E20	ZNF483	1	0.011591963
RP11-761E20	ZNF410	1	0.024729521
