# Supplementary material for: Identification of Potential Prognostic Biomarkers for Breast Cancer Based on lncRNA-TF-Associated ceRNA Network and Functional Module
Source: Biomed Res Int. 2020 Jul 28;2020:5257896. doi: 10.1155/2020/5257896 (PMC7411464; doi:10.1155/2020/5257896)
Supplement: Supplementary 5 — Supplementary Table S5: raw data for PCC results between lncRNAs and TFs. [file 5257896.f5.csv]

LNCRNA	TF	PCC
RP11-206L10	RBM15	0.649644783
RP11-206L10	ZBTB37	0.628540135
RP11-206L10	MDM4	0.730089705
RP11-206L10	ZNF124	0.693061485
RP11-206L10	ZBTB20	0.821226029
RP11-206L10	ZNF141	0.639973831
RP11-206L10	MATR3	0.693061082
RP11-206L10	ZNF451	0.617352725
RP11-206L10	SHPRH	0.722858133
RP11-206L10	DMTF1	0.688586332
RP11-206L10	HMBOX1	0.668100904
RP11-206L10	ZNF248	0.620220885
RP11-206L10	ZNF26	0.717669692
RP11-206L10	ZBTB25	0.615287675
RP11-206L10	ZNF410	0.731916809
RP11-206L10	NFAT5	0.62825701
RP11-206L10	ZNF519	0.738394826
RP11-206L10	PIAS2	0.635287136
RP11-206L10	ZNF236	0.648708636
RP11-206L10	ZNF564	0.643937246
RP11-206L10	ZNF493	0.631694725
RP11-206L10	ZNF91	0.655835912
RP11-206L10	ZNF382	0.611331375
RP11-206L10	ZNF571	0.614395201
RP11-206L10	ZNF573	0.728416442
RP11-206L10	ZNF546	0.609771985
RP11-206L10	ZNF235	0.635626145
FAM87B	HOXD3	0.667054132
FAM87B	ZBTB20	0.657024416
FAM87B	SHPRH	0.658053118
FAM87B	RUNX1T1	0.667907388
RP4-758J18	ZBTB17	0.63224625
RP3-395M20	HDAC9	0.665844392
RP11-740P5	LMO3	0.778623087
RP11-740P5	POU4F1	0.611131334
RP11-46F15	ANKZF1	0.625494273
RP11-46F15	TAF1C	0.62869019
RP11-46F15	CXXC1	0.615907105
RP5-1092A11	HOXD3	0.618810642
RP5-1092A11	ZBTB20	0.636910235
RP5-1092A11	MATR3	0.693655017
RP11-334N17	MATR3	0.656432668
RP3-453P22	ZBTB20	0.609469365
RP3-467L1	ZBTB20	0.626291406
RP3-467L1	ZNF483	0.623261437
RP3-467L1	ZNF26	0.611848562
RP3-467L1	ZNF410	0.639299804
RP3-467L1	ZNF586	0.644164144
CTA-215D11	TBR1	0.914273587
RP5-1115A15	MDM4	0.629377959
RP5-1115A15	ZBTB20	0.716316581
RP5-1115A15	MATR3	0.749516339
RP5-1115A15	SHPRH	0.624990563
RP5-1115A15	HMBOX1	0.622452416
RP5-1115A15	ZNF483	0.64510804
RP5-1115A15	ZNF26	0.725623016
RP5-1115A15	ZNF410	0.762055544
RP5-1115A15	ZNF546	0.602364136
RP5-1115A15	ZNF586	0.695164966
RP4-633I8	RBM15	0.630897068
RP4-633I8	ZBTB37	0.646920942
RP4-633I8	MDM4	0.682486215
RP4-633I8	ZNF124	0.650557041
RP4-633I8	HOXD3	0.600677622
RP4-633I8	ZBTB20	0.801857202
RP4-633I8	ZNF141	0.634599517
RP4-633I8	MATR3	0.766334481
RP4-633I8	SHPRH	0.722167452
RP4-633I8	HMBOX1	0.640546172
RP4-633I8	ZNF483	0.665884145
RP4-633I8	YAF2	0.605697229
RP4-633I8	ZNF26	0.729473839
RP4-633I8	ZNF410	0.779369301
RP4-633I8	RORA	0.603747284
RP4-633I8	ZNF519	0.687668854
RP4-633I8	PIAS2	0.614091584
RP4-633I8	ZNF236	0.614223759
RP4-633I8	ZNF564	0.642245658
RP4-633I8	ZNF91	0.652209453
RP4-633I8	ZNF573	0.675554014
RP4-633I8	ZNF546	0.60211265
RP4-633I8	ZNF586	0.665289868
RP11-558F24	ZBTB20	0.769604583
RP4-734G22	MATR3	0.617181379
RP4-734G22	RREB1	0.612583203
RP4-734G22	ZNF26	0.611142108
RP4-734G22	ZNF410	0.734133344
RP4-734G22	CHD2	0.612520496
RP4-734G22	ZNF586	0.680768436
RP5-888M10	EPAS1	0.670654227
RP5-888M10	PPARG	0.781101919
RP5-888M10	KLF15	0.680646311
RP5-888M10	MLXIPL	0.739212586
RP5-888M10	EBF3	0.642644866
RP5-888M10	EZH1	0.616852209
RP5-888M10	CEBPA	0.756432282
RP4-597A16	SMYD1	0.603914499
RP4-704D23	NKX3-1	0.609628108
C1orf195	RBM15	0.651283904
C1orf195	ZBTB37	0.628129433
C1orf195	MDM4	0.641865939
C1orf195	ZNF124	0.707206735
C1orf195	ZBTB20	0.794089373
C1orf195	MATR3	0.726183621
C1orf195	ZNF451	0.609306968
C1orf195	SHPRH	0.652352126
C1orf195	HMBOX1	0.625753806
C1orf195	ERCC6	0.605314173
C1orf195	ZNF26	0.66065857
C1orf195	ZNF410	0.719654854
C1orf195	NFAT5	0.619590941
C1orf195	ZNF519	0.694627056
C1orf195	ZNF91	0.622425013
C1orf195	ZNF382	0.631312086
C1orf195	ZNF571	0.695740026
C1orf195	ZNF573	0.747130643
C1orf195	ZNF546	0.617312732
C1orf195	ZNF235	0.684335756
RP11-288I21	RBM15	0.646192269
RP11-288I21	MDM4	0.613313441
RP11-288I21	ZNF124	0.607827151
RP11-288I21	HOXD3	0.632771319
RP11-288I21	ZBTB20	0.71604835
RP11-288I21	ZNF141	0.61690981
RP11-288I21	MATR3	0.648023226
RP11-288I21	SHPRH	0.664708842
RP11-288I21	DMTF1	0.636126951
RP11-288I21	HMBOX1	0.651414066
RP11-288I21	ZNF26	0.668090686
RP11-288I21	ZNF410	0.721855231
RP11-288I21	ZNF519	0.624251392
RP11-288I21	ZNF236	0.621170753
RP11-288I21	ZNF573	0.68943967
RP11-288I21	ZNF546	0.603608485
RP11-288I21	ZNF235	0.674149387
RP1-163M9	ZNF571	0.618391287
RP11-380J14	SCMH1	0.604474421
RP11-174G17	ZBTB20	0.616389339
RP11-174G17	MATR3	0.696836169
RP11-174G17	ZNF410	0.673855014
RP11-174G17	ZNF546	0.649879077
RP11-174G17	ZNF235	0.61704582
RP3-329E20	RBM15	0.613808007
RP3-329E20	ZBTB20	0.760497829
RP3-329E20	MATR3	0.692763766
RP3-329E20	SHPRH	0.644895698
RP3-329E20	HMBOX1	0.618029396
RP3-329E20	ZNF483	0.665883376
RP3-329E20	ZNF26	0.696113213
RP3-329E20	ZNF410	0.760267428
RP3-329E20	ZNF519	0.630206565
RP3-329E20	ZNF564	0.60421439
RP3-329E20	ZNF573	0.616609239
RP3-329E20	ZNF586	0.694977271
RP5-1071N3	RBM15	0.619789137
RP5-1071N3	ZBTB20	0.701903845
RP5-1071N3	MATR3	0.663956464
RP5-1071N3	ZNF26	0.68798047
RP5-1071N3	ZNF410	0.662039175
RP5-1071N3	ZNF519	0.628849885
RP5-1071N3	ZNF586	0.619673076
RP1-224A6	ZBTB37	0.677815456
RP1-224A6	MDM4	0.687887481
RP1-224A6	ELK4	0.675385802
RP1-224A6	ZNF124	0.653583978
RP1-224A6	REL	0.646819891
RP1-224A6	ZBTB20	0.701031287
RP1-224A6	MATR3	0.749121099
RP1-224A6	PURA	0.60176189
RP1-224A6	ZNF451	0.635562119
RP1-224A6	SHPRH	0.606290848
RP1-224A6	ZNF117	0.646267434
RP1-224A6	ZDHHC21	0.634457216
RP1-224A6	ERCC6	0.635173726
RP1-224A6	ATM	0.61064252
RP1-224A6	ZNF26	0.603306634
RP1-224A6	ZBTB25	0.640142695
RP1-224A6	ZNF410	0.662739138
RP1-224A6	RORA	0.607206369
RP1-224A6	NFAT5	0.60545179
RP1-224A6	ZNF519	0.630655472
RP1-224A6	PIAS2	0.604795152
RP1-224A6	ZNF493	0.637693449
RP1-224A6	ZNF91	0.711059446
RP1-224A6	ZNF566	0.61839537
RP1-224A6	ZNF382	0.674005061
RP1-224A6	ZNF573	0.665051094
RP11-69E9	ZNF571	0.626528536
RP11-69E9	ZNF235	0.66543469
RP1-184J9	HOXD3	0.748831402
RP1-184J9	RUNX1T1	0.676075148
RP1-184J9	HMGA2	0.711887862
MDS2	SP140	0.7254211
MDS2	EOMES	0.609189891
MDS2	HCLS1	0.607900938
MDS2	TCF7	0.704941113
MDS2	PAX5	0.796191734
MDS2	IRF8	0.64525055
MDS2	POU2F2	0.768236354
RP1-187B23	ZBTB20	0.698920119
RP1-187B23	ZNF26	0.608746705
RP1-187B23	ZNF410	0.617801833
RP1-187B23	ZNF236	0.612612135
RP3-476K8	RBM15	0.664663793
RP3-476K8	ZBTB37	0.691958448
RP3-476K8	MDM4	0.750838413
RP3-476K8	ZNF124	0.69313882
RP3-476K8	BAZ2B	0.631544368
RP3-476K8	ZBTB20	0.8410176
RP3-476K8	ZNF141	0.687928283
RP3-476K8	MATR3	0.845094809
RP3-476K8	SHPRH	0.724676452
RP3-476K8	DMTF1	0.709522178
RP3-476K8	HMBOX1	0.693014767
RP3-476K8	ZNF248	0.624757313
RP3-476K8	YAF2	0.622816867
RP3-476K8	ZNF26	0.727156695
RP3-476K8	ZBTB25	0.629206119
RP3-476K8	ZNF410	0.786684807
RP3-476K8	RORA	0.629930062
RP3-476K8	NFAT5	0.623405602
RP3-476K8	ZNF519	0.76907009
RP3-476K8	PIAS2	0.648188284
RP3-476K8	ZNF236	0.638804708
RP3-476K8	ZNF564	0.617782236
RP3-476K8	ZNF493	0.649870357
RP3-476K8	ZNF91	0.658897259
RP3-476K8	ZNF573	0.718505584
RP3-476K8	ZNF546	0.708801559
RP3-476K8	ZNF235	0.669103238
RP3-476K8	ZNF586	0.628172813
RP3-476K8	ZNF81	0.612649711
RP4-752I6	RBM15	0.691741571
RP4-752I6	ZBTB37	0.706582064
RP4-752I6	MDM4	0.723939771
RP4-752I6	ZNF124	0.770387113
RP4-752I6	REL	0.616999283
RP4-752I6	BAZ2B	0.64765851
RP4-752I6	ZBTB20	0.938829384
RP4-752I6	ZNF141	0.636582844
RP4-752I6	MATR3	0.838412941
RP4-752I6	ZNF451	0.616630024
RP4-752I6	SHPRH	0.736295639
RP4-752I6	DMTF1	0.633487775
RP4-752I6	HMBOX1	0.719741122
RP4-752I6	ZNF26	0.681085953
RP4-752I6	ZNF410	0.781966062
RP4-752I6	RORA	0.611754201
RP4-752I6	NFAT5	0.633912079
RP4-752I6	ZNF519	0.785979695
RP4-752I6	PIAS2	0.628850357
RP4-752I6	ZNF564	0.658246396
RP4-752I6	ZNF493	0.645211092
RP4-752I6	ZNF91	0.68760872
RP4-752I6	ZNF571	0.658308608
RP4-752I6	ZNF573	0.774517811
RP4-752I6	ZNF546	0.690005651
RP4-752I6	ZNF283	0.604193846
RP4-752I6	ZNF235	0.710617847
RP4-752I6	ZNF81	0.629457444
RP3-426I6	RBM15	0.607132294
RP3-426I6	ZBTB37	0.644197609
RP3-426I6	MDM4	0.666024744
RP3-426I6	ZNF124	0.67122965
RP3-426I6	ZBTB20	0.76767292
RP3-426I6	MATR3	0.812665094
RP3-426I6	SHPRH	0.605858631
RP3-426I6	ZNF26	0.657204724
RP3-426I6	ZNF410	0.684020366
RP3-426I6	RORA	0.617700441
RP3-426I6	NFAT5	0.600032117
RP3-426I6	ZNF519	0.716768986
RP3-426I6	PIAS2	0.607129053
RP3-426I6	ZNF91	0.630160432
RP3-426I6	ZNF573	0.66872281
RP3-426I6	ZNF546	0.612925755
RP11-460I13	HOXD3	0.60787808
RP11-460I13	ZBTB20	0.696524663
RP11-460I13	SHPRH	0.642291476
RP11-460I13	ZNF26	0.655245338
RP11-460I13	ZNF410	0.621917463
RP11-460I13	ZNF519	0.606137737
RP11-460I13	ZNF573	0.615959251
RNU11	ZNF124	0.700738601
RNU11	ZBTB20	0.661447467
RNU11	ZNF91	0.607854447
RP11-242O24	REL	0.608227352
RP11-242O24	ZBTB20	0.662582103
RP11-467D18	RBM15	0.662012134
RP11-467D18	ZBTB37	0.612773551
RP11-467D18	MDM4	0.653834366
RP11-467D18	ZNF124	0.658935271
RP11-467D18	REL	0.610839744
RP11-467D18	BAZ2B	0.629089397
RP11-467D18	ZBTB20	0.833440458
RP11-467D18	ZNF141	0.625627006
RP11-467D18	MATR3	0.644030252
RP11-467D18	SHPRH	0.726705583
RP11-467D18	DMTF1	0.609193494
RP11-467D18	HMBOX1	0.662403973
RP11-467D18	ZNF26	0.677704511
RP11-467D18	ZNF410	0.693117102
RP11-467D18	NFAT5	0.639061622
RP11-467D18	ZNF519	0.717113129
RP11-467D18	ZNF236	0.67403558
RP11-467D18	ZNF564	0.623749011
RP11-467D18	ZNF573	0.71869711
RP11-467D18	ZNF235	0.612263825
RP11-467D18	ZNF81	0.618505186
RP3-437I16	ZNF124	0.60533734
RP3-437I16	ZBTB20	0.610310618
RP3-437I16	ERCC6	0.61560454
RP3-437I16	ZNF382	0.669236297
RP3-437I16	ZNF571	0.647929336
RP3-437I16	ZNF573	0.687810338
RP5-893G23	MATR3	0.689598114
RP11-266K22	RBM15	0.62328335
RP11-266K22	ZBTB37	0.637762549
RP11-266K22	MDM4	0.694339764
RP11-266K22	ZNF124	0.743097393
RP11-266K22	ZBTB20	0.792524964
RP11-266K22	MATR3	0.88701344
RP11-266K22	ZNF451	0.607885839
RP11-266K22	SHPRH	0.663067632
RP11-266K22	DMTF1	0.636576541
RP11-266K22	YAF2	0.647773689
RP11-266K22	ZNF26	0.672442004
RP11-266K22	ZBTB25	0.604164448
RP11-266K22	ZNF410	0.706197524
RP11-266K22	RORA	0.623537053
RP11-266K22	ZNF519	0.770518171
RP11-266K22	PIAS2	0.676004434
RP11-266K22	ZNF564	0.60609233
RP11-266K22	ZNF493	0.628067386
RP11-266K22	ZNF91	0.630255208
RP11-266K22	ZNF573	0.676060404
RP11-266K22	ZNF546	0.651456272
RP11-266K22	ZNF235	0.619333244
RP11-73M7	ZBTB20	0.676765717
RP11-73M7	MATR3	0.65375492
RP11-73M7	HMBOX1	0.650008742
RP11-73M7	ZNF26	0.615698477
RP11-73M7	ZNF410	0.68925261
RP11-73M7	ZNF573	0.619499771
RP11-73M7	ZNF546	0.611317557
RP11-73M7	ZNF235	0.663925234
RP11-84A19	ZBTB37	0.691126011
RP11-84A19	MDM4	0.683569989
RP11-84A19	ZBTB20	0.688418316
RP11-84A19	MATR3	0.864557613
RP11-84A19	ZNF26	0.621191911
RP11-84A19	ZNF410	0.712745277
RP11-84A19	ZNF493	0.601649587
RP11-84A19	ZNF91	0.664752348
RP11-84A19	ZNF546	0.614843318
RP4-534N18	ZBTB20	0.69362982
RP4-534N18	MATR3	0.62584984
RP4-534N18	HMBOX1	0.603356189
RP4-534N18	ZNF26	0.605601934
RP4-534N18	ZNF410	0.7098959
RP11-277A4	RBM15	0.668392074
RP11-277A4	ZNF124	0.685362498
RP11-277A4	ZBTB20	0.716366639
RP11-277A4	MATR3	0.646678879
RP11-277A4	SHPRH	0.613379677
RP11-277A4	ZNF410	0.653511001
RP11-277A4	ZNF519	0.638543263
RP11-277A4	ZNF573	0.61742289
RP11-114B7	HOXD11	0.794585566
RP1-117O3	RBM15	0.617470691
RP1-117O3	MDM4	0.616094686
RP1-117O3	ELK4	0.602250057
RP1-117O3	ZNF124	0.725612243
RP1-117O3	ZBTB20	0.736891232
RP1-117O3	MATR3	0.664355139
RP1-117O3	ZNF451	0.624679767
RP1-117O3	SHPRH	0.667035702
RP1-117O3	ZNF26	0.606255914
RP1-117O3	ZNF410	0.635253455
RP1-117O3	NFAT5	0.62193248
RP1-117O3	ZNF519	0.672327144
RP1-117O3	ZNF91	0.615486246
RP1-117O3	ZNF382	0.618336593
RP1-117O3	ZNF573	0.659354272
RP11-131M11	ZBTB20	0.648880086
RP11-131M11	ZNF410	0.626661614
RP11-415J8	RBM15	0.624559187
RP11-415J8	ZNF124	0.666495791
RP11-415J8	ZBTB20	0.685409962
RP11-415J8	MATR3	0.640850448
RP11-415J8	SHPRH	0.603815813
RP11-415J8	ZNF117	0.604135153
RP11-415J8	DMTF1	0.602769397
RP11-415J8	ZNF26	0.601314661
RP11-415J8	ZNF410	0.654542097
RP11-415J8	NFAT5	0.60440523
RP11-415J8	ZNF519	0.627894711
RP11-415J8	ZNF573	0.62563886
RP4-728D4	ZBTB37	0.750190215
RP4-728D4	MDM4	0.765306227
RP4-728D4	ZNF124	0.653924342
RP4-728D4	BAZ2B	0.658135105
RP4-728D4	ZBTB20	0.860085244
RP4-728D4	ZNF141	0.637324798
RP4-728D4	MATR3	0.874371505
RP4-728D4	SHPRH	0.7141326
RP4-728D4	DMTF1	0.600232842
RP4-728D4	HMBOX1	0.711447408
RP4-728D4	ZNF26	0.706642746
RP4-728D4	ZBTB25	0.617280209
RP4-728D4	ZNF410	0.83498579
RP4-728D4	RORA	0.64701095
RP4-728D4	NFAT5	0.600587867
RP4-728D4	ZNF519	0.679670342
RP4-728D4	ZNF564	0.686414086
RP4-728D4	ZNF493	0.670231003
RP4-728D4	ZNF91	0.742705859
RP4-728D4	ZNF573	0.675945896
RP4-728D4	ZNF546	0.670523885
RP4-728D4	ZNF586	0.625537625
RP4-665N4	RBM15	0.695187663
RP4-665N4	MDM4	0.611344063
RP4-665N4	ZNF124	0.682144607
RP4-665N4	ZBTB20	0.763656774
RP4-665N4	MATR3	0.699320305
RP4-665N4	SHPRH	0.650287944
RP4-665N4	DMTF1	0.60559211
RP4-665N4	HMBOX1	0.642736281
RP4-665N4	ZNF26	0.682484967
RP4-665N4	ZNF410	0.719789088
RP4-665N4	ZNF519	0.690379941
RP4-665N4	ZNF573	0.667365428
RP4-665N4	ZNF235	0.624977685
RP5-864K19	EPAS1	0.682689001
RP5-864K19	PPARG	0.846993338
RP5-864K19	KLF15	0.732712497
RP5-864K19	MLXIPL	0.79008994
RP5-864K19	EBF2	0.607111584
RP5-864K19	EBF3	0.7244563
RP5-864K19	STAT5A	0.605119805
RP5-864K19	PTRF	0.614014648
RP5-864K19	CEBPA	0.751927126
RP11-416A14	ZBTB37	0.632856853
RP11-416A14	MDM4	0.623795267
RP11-416A14	ZNF124	0.621870836
RP11-416A14	ZBTB20	0.675889413
RP11-416A14	MATR3	0.885239499
RP11-416A14	ZNF26	0.631937301
RP11-416A14	ZNF410	0.660833696
RP11-416A14	ZNF519	0.655920295
RP11-416A14	ZNF546	0.645654033
RP11-420K8	RBM15	0.670340343
RP11-420K8	ZNF124	0.627857246
RP11-420K8	ZBTB20	0.795402088
RP11-420K8	MATR3	0.651339272
RP11-420K8	SHPRH	0.674794802
RP11-420K8	HMBOX1	0.702698913
RP11-420K8	ZNF26	0.663203749
RP11-420K8	ZNF410	0.760162038
RP11-420K8	ZNF519	0.637914811
RP11-420K8	ZNF236	0.607695512
RP11-420K8	ZNF573	0.66986043
RP11-420K8	ZNF235	0.618268804
RP11-420K8	ZNF586	0.622194609
RP5-1066H13	SCMH1	0.643105952
SLFNL1-AS1	RBM15	0.667923426
SLFNL1-AS1	ZNF124	0.661949195
SLFNL1-AS1	ZBTB20	0.646858273
SLFNL1-AS1	ZNF26	0.653938346
SLFNL1-AS1	ZNF519	0.644120645
SLFNL1-AS1	ZNF573	0.607641784
RP1-92O14	RBM15	0.600015175
RP11-184I16	TBX15	0.620886613
RP11-184I16	SMYD1	0.952118475
RP11-184I16	BIN1	0.863067165
RP11-184I16	PITX2	0.704673784
RP11-184I16	MEF2C	0.845072347
RP11-184I16	ANKRD1	0.883478731
RP11-184I16	ASB8	0.648449369
MKNK1-AS1	RBM15	0.620261334
MKNK1-AS1	ZNF124	0.613307568
MKNK1-AS1	ZBTB20	0.715655942
MKNK1-AS1	MATR3	0.698632213
MKNK1-AS1	SHPRH	0.646798824
MKNK1-AS1	DMTF1	0.634359029
MKNK1-AS1	HMBOX1	0.655950985
MKNK1-AS1	ZNF26	0.60191823
MKNK1-AS1	ZNF410	0.718039401
MKNK1-AS1	NFAT5	0.617773977
MKNK1-AS1	ZNF519	0.648770047
MKNK1-AS1	ZNF571	0.633844737
MKNK1-AS1	ZNF573	0.698334358
MKNK1-AS1	ZNF546	0.670639264
MKNK1-AS1	ZNF235	0.726324446
MKNK1-AS1	ZNF81	0.616423722
RP1-18D14	EPAS1	0.60213792
RP1-18D14	EZH1	0.648521375
RP1-18D14	ERG	0.631115556
RP4-683M8	ZBTB20	0.643159614
RP5-1024N4	ZBTB37	0.624947452
RP5-1024N4	MDM4	0.618690335
RP5-1024N4	ZBTB20	0.83322108
RP5-1024N4	MATR3	0.728072858
RP5-1024N4	HMBOX1	0.662429472
RP5-1024N4	ZNF410	0.681979957
RP5-1024N4	ZNF519	0.658507045
RP5-1024N4	ZNF564	0.60011528
RP5-1024N4	ZNF573	0.603245803
RP5-1024N4	ZNF546	0.641380253
RP11-141A19	ZBTB37	0.648240208
RP11-141A19	MDM4	0.636647179
RP11-141A19	ZNF124	0.658053848
RP11-141A19	ZBTB20	0.768093896
RP11-141A19	MATR3	0.891009707
RP11-141A19	SHPRH	0.608852611
RP11-141A19	YAF2	0.605152759
RP11-141A19	ZNF410	0.681068
RP11-141A19	ZNF519	0.725706626
RP11-141A19	ZNF91	0.604885299
RP11-141A19	ZNF546	0.632033725
RP11-93G23	MDM4	0.648385345
RP11-93G23	ZBTB20	0.838471888
RP11-93G23	MATR3	0.631003137
RP11-93G23	SHPRH	0.636344115
RP11-93G23	HMBOX1	0.647929817
RP11-93G23	ZNF410	0.647262467
RP11-93G23	ZNF519	0.66077474
RP11-567C20	HOXD3	0.691221258
RP11-567C20	FOXP2	0.606535491
RP11-567C20	RUNX1T1	0.679744456
RP11-567C20	VAX1	0.602045148
RP11-567C20	HMGA2	0.825582535
RP11-567C20	MEIS2	0.641395347
RP5-850O15	RBM15	0.642847315
RP5-850O15	ZBTB37	0.710163983
RP5-850O15	MDM4	0.75133056
RP5-850O15	ZNF124	0.698976095
RP5-850O15	REL	0.664026145
RP5-850O15	BAZ2B	0.647149668
RP5-850O15	ZBTB20	0.883907984
RP5-850O15	ZNF141	0.639339551
RP5-850O15	MATR3	0.813157424
RP5-850O15	SHPRH	0.748027532
RP5-850O15	DMTF1	0.627816242
RP5-850O15	HMBOX1	0.68999255
RP5-850O15	ZNF483	0.602615449
RP5-850O15	YAF2	0.612474526
RP5-850O15	ZNF26	0.69746052
RP5-850O15	ZBTB25	0.607181157
RP5-850O15	ZNF410	0.797018147
RP5-850O15	RORA	0.631776411
RP5-850O15	NFAT5	0.656659811
RP5-850O15	ZNF519	0.735350417
RP5-850O15	PIAS2	0.614661329
RP5-850O15	ZNF236	0.610621008
RP5-850O15	ZNF564	0.65920568
RP5-850O15	ZNF493	0.634771335
RP5-850O15	ZNF91	0.728857112
RP5-850O15	ZNF573	0.696712919
RP5-850O15	ZNF546	0.60767716
RP5-850O15	ZNF586	0.605662165
RP5-850O15	ZNF81	0.614625221
RP11-296A18	ZBTB37	0.725327967
RP11-296A18	MDM4	0.750625932
RP11-296A18	ZNF124	0.600362209
RP11-296A18	REL	0.658370892
RP11-296A18	BAZ2B	0.664651054
RP11-296A18	ZBTB20	0.845774412
RP11-296A18	ZNF141	0.655028026
RP11-296A18	MATR3	0.747192163
RP11-296A18	SHPRH	0.711625482
RP11-296A18	DMTF1	0.63227496
RP11-296A18	HMBOX1	0.707510153
RP11-296A18	ZNF483	0.601293537
RP11-296A18	ZNF26	0.687124893
RP11-296A18	ZBTB25	0.610812262
RP11-296A18	ZNF410	0.795639619
RP11-296A18	RORA	0.615324615
RP11-296A18	NFAT5	0.633626633
RP11-296A18	ZNF519	0.684615729
RP11-296A18	ZNF236	0.627849437
RP11-296A18	ZNF564	0.651403836
RP11-296A18	ZNF493	0.655575722
RP11-296A18	ZNF91	0.720885001
RP11-296A18	ZNF573	0.674246813
RP11-296A18	ZNF546	0.627919021
RP11-296A18	ZNF586	0.633244959
RP11-296A18	ZNF81	0.602077862
RP11-275F13	RBM15	0.618242647
RP11-275F13	ZBTB37	0.65126919
RP11-275F13	MDM4	0.707006441
RP11-275F13	ZNF124	0.638115631
RP11-275F13	REL	0.645645122
RP11-275F13	BAZ2B	0.624817322
RP11-275F13	ZBTB20	0.87237474
RP11-275F13	ZNF141	0.602526207
RP11-275F13	MATR3	0.683497601
RP11-275F13	SHPRH	0.690500603
RP11-275F13	HMBOX1	0.696992999
RP11-275F13	ZNF26	0.624419461
RP11-275F13	ZNF410	0.731824641
RP11-275F13	ZNF519	0.672519878
RP11-275F13	ZNF236	0.61138813
RP11-275F13	ZNF564	0.613805419
RP11-275F13	ZNF91	0.666808427
RP11-275F13	ZNF573	0.644256099
RP11-275F13	ZNF81	0.600408135
RP11-253A20	ZBTB37	0.653662877
RP11-253A20	MDM4	0.694161429
RP11-253A20	ZNF124	0.683764752
RP11-253A20	ZBTB20	0.74701094
RP11-253A20	MATR3	0.888157473
RP11-253A20	DMTF1	0.600291608
RP11-253A20	YAF2	0.613314635
RP11-253A20	ZNF26	0.634217642
RP11-253A20	ZBTB25	0.633185896
RP11-253A20	ZNF410	0.685920659
RP11-253A20	RORA	0.614532046
RP11-253A20	ZNF519	0.70859281
RP11-253A20	PIAS2	0.636890002
RP11-253A20	ZNF493	0.648408414
RP11-253A20	ZNF91	0.676894666
RP11-253A20	ZNF382	0.615800079
RP11-253A20	ZNF573	0.637759727
RP11-253A20	ZNF546	0.651575104
RP4-657D16	RBM15	0.611367338
RP4-657D16	ZBTB37	0.622058918
RP4-657D16	MDM4	0.660563975
RP4-657D16	ZNF124	0.69528072
RP4-657D16	BAZ2B	0.610815358
RP4-657D16	ZBTB20	0.720919336
RP4-657D16	ZNF141	0.606250017
RP4-657D16	MATR3	0.839874918
RP4-657D16	ZNF451	0.604484026
RP4-657D16	SHPRH	0.690002673
RP4-657D16	DMTF1	0.689087012
RP4-657D16	ATM	0.649204656
RP4-657D16	YAF2	0.611172825
RP4-657D16	ZNF26	0.646604177
RP4-657D16	ZNF410	0.673216073
RP4-657D16	RORA	0.66138857
RP4-657D16	NFAT5	0.716144786
RP4-657D16	ZNF519	0.75273776
RP4-657D16	PIAS2	0.622525162
RP4-657D16	ZNF493	0.635297672
RP4-657D16	ZNF573	0.672219433
RP4-657D16	ZNF546	0.646908356
RP4-657D16	ZNF235	0.61727652
RP11-91A18	RBM15	0.639266781
RP11-91A18	ZNF124	0.606646586
RP11-91A18	ZBTB20	0.770919271
RP11-91A18	MATR3	0.62210658
RP11-91A18	SHPRH	0.661092606
RP11-91A18	HMBOX1	0.67193388
RP11-91A18	ZNF26	0.645425222
RP11-91A18	ZNF410	0.707649872
RP11-91A18	ZNF519	0.6210857
RP11-91A18	ZNF573	0.62465793
RP11-25O10	ZBTB20	0.601167369
RP11-25O10	HMGA2	0.623014423
RP4-631H13	ZBTB20	0.738741985
RP4-631H13	SHPRH	0.600991028
RP4-631H13	HMBOX1	0.625906334
RP4-631H13	ZNF26	0.620024174
RP4-631H13	ZNF410	0.657147399
RP4-631H13	ZNF236	0.609790056
RP4-631H13	ZNF573	0.602854572
RP11-117D22	SP140	0.755682298
RP11-117D22	EOMES	0.676973509
RP11-117D22	HCLS1	0.643336771
RP11-117D22	TCF7	0.626715201
RP11-117D22	PAX5	0.666377541
RP11-117D22	IRF8	0.735115301
RP11-117D22	TBX21	0.622228273
RP11-117D22	POU2F2	0.736527106
SSBP3-AS1	RBM15	0.644645398
SSBP3-AS1	ZNF124	0.621852591
SSBP3-AS1	ZBTB20	0.688383776
SSBP3-AS1	MATR3	0.697005432
SSBP3-AS1	SHPRH	0.619445745
SSBP3-AS1	DMTF1	0.64632064
SSBP3-AS1	ZNF26	0.625879667
SSBP3-AS1	ZNF410	0.61908752
SSBP3-AS1	ZNF519	0.699037273
SSBP3-AS1	ZNF573	0.625575166
SSBP3-AS1	ZNF235	0.650141027
RP5-997D24	RBM15	0.705555242
RP5-997D24	ZNF124	0.735387403
RP5-997D24	ZBTB20	0.751031873
RP5-997D24	MATR3	0.822232462
RP5-997D24	SHPRH	0.617694064
RP5-997D24	ZNF26	0.637388027
RP5-997D24	ZNF410	0.696594279
RP5-997D24	ZNF519	0.714608671
RP5-997D24	ZNF571	0.619212536
RP5-997D24	ZNF573	0.698615339
RP5-997D24	ZNF546	0.651524987
RP5-997D24	ZNF235	0.714445264
RP11-240D10	ZNF235	0.626726513
RP11-90C4	HOXD3	0.684152145
RP11-90C4	FOXP2	0.601081997
RP11-90C4	RUNX1T1	0.686822948
RP11-90C4	HMGA2	0.819609847
RP11-90C4	MEIS2	0.640187464
RP6-102O10	HOXD3	0.706465441
RP6-102O10	RUNX1T1	0.690647443
RP6-102O10	HMGA2	0.802724769
RP6-102O10	MEIS2	0.621071345
RP11-393I23	ZBTB20	0.758765747
RP11-393I23	ZNF141	0.608498622
RP11-393I23	MATR3	0.675998964
RP11-393I23	SHPRH	0.694940194
RP11-393I23	HMBOX1	0.626944458
RP11-393I23	ZNF483	0.687109803
RP11-393I23	ZNF26	0.685284919
RP11-393I23	ZNF410	0.724190659
RP11-393I23	ZNF564	0.657543659
RP11-393I23	ZNF586	0.644415112
RP11-63G10	MDM4	0.629356886
RP11-63G10	ELK4	0.619588614
RP11-63G10	ZNF124	0.650250023
RP11-63G10	ZBTB20	0.706304636
RP11-63G10	MATR3	0.699735315
RP11-63G10	ZNF451	0.611610778
RP11-63G10	SHPRH	0.61697583
RP11-63G10	ZNF117	0.648214886
RP11-63G10	ERCC6	0.639590709
RP11-63G10	ZNF26	0.601431149
RP11-63G10	ZBTB25	0.616189611
RP11-63G10	ZNF410	0.633735065
RP11-63G10	ZNF519	0.638800009
RP11-63G10	PIAS2	0.604992189
RP11-63G10	ZNF493	0.609495036
RP11-63G10	ZNF91	0.63921666
RP11-63G10	ZNF566	0.614277156
RP11-63G10	ZNF382	0.673412667
RP11-63G10	ZNF573	0.662303015
RP11-145M4	MATR3	0.600445019
RP11-470E16	ZNF689	0.706639376
RP11-436K8	HOXD3	0.6076207
RP11-436K8	RUNX1T1	0.618599454
RP11-436K8	HMGA2	0.69204175
RP4-802A10	RBM15	0.604081192
RP4-802A10	MDM4	0.656681876
RP4-802A10	ZNF124	0.646507673
RP4-802A10	HOXD3	0.68255264
RP4-802A10	ZBTB20	0.753614111
RP4-802A10	ZNF141	0.624022883
RP4-802A10	MATR3	0.776355832
RP4-802A10	SHPRH	0.655920024
RP4-802A10	DMTF1	0.600150533
RP4-802A10	HMBOX1	0.626935708
RP4-802A10	RUNX1T1	0.648559671
RP4-802A10	YAF2	0.614633635
RP4-802A10	ZNF26	0.617554191
RP4-802A10	ZNF410	0.711133698
RP4-802A10	ZNF519	0.642821404
RP5-849H19	RBM15	0.656009655
RP5-849H19	ZNF124	0.759132517
RP5-849H19	ZBTB20	0.751266967
RP5-849H19	MATR3	0.845429611
RP5-849H19	SHPRH	0.610614881
RP5-849H19	ZNF410	0.62891695
RP5-849H19	ZNF519	0.765470069
RP5-849H19	PIAS2	0.62790335
RP5-849H19	ZNF573	0.665164096
RP5-849H19	ZNF546	0.607065427
RP5-849H19	ZNF235	0.623813522
RP11-230B22	ZNF124	0.628881758
RP11-230B22	ZNF519	0.620776661
DLEU2L	ZBTB37	0.705305304
DLEU2L	MDM4	0.741380267
DLEU2L	ELK4	0.64170528
DLEU2L	ZNF124	0.714286237
DLEU2L	REL	0.637695758
DLEU2L	BAZ2B	0.643366348
DLEU2L	ZBTB20	0.786693557
DLEU2L	ZNF141	0.656054516
DLEU2L	MATR3	0.858049982
DLEU2L	PURA	0.658250631
DLEU2L	ZNF451	0.662338452
DLEU2L	SHPRH	0.742132834
DLEU2L	ZNF117	0.637268657
DLEU2L	DMTF1	0.698555441
DLEU2L	HMBOX1	0.603774093
DLEU2L	ZDHHC21	0.64543716
DLEU2L	ZNF248	0.628397703
DLEU2L	ZNF33A	0.616598505
DLEU2L	ERCC6	0.657086598
DLEU2L	ATM	0.685301486
DLEU2L	YAF2	0.622596491
DLEU2L	ZNF26	0.665041508
DLEU2L	ZBTB25	0.687321659
DLEU2L	ZNF410	0.755995122
DLEU2L	RORA	0.688003723
DLEU2L	NFAT5	0.712712301
DLEU2L	ZNF519	0.759965469
DLEU2L	PIAS2	0.670384662
DLEU2L	ZNF564	0.645773665
DLEU2L	ZNF431	0.626311353
DLEU2L	ZNF708	0.606504977
DLEU2L	ZNF493	0.744111443
DLEU2L	ZNF91	0.738985195
DLEU2L	ZNF382	0.679738684
DLEU2L	ZNF345	0.610190582
DLEU2L	ZNF571	0.61864691
DLEU2L	ZNF573	0.754609007
DLEU2L	ZNF546	0.702849949
DLEU2L	ZNF283	0.617236249
DLEU2L	ZNF235	0.636773314
DLEU2L	BRWD1	0.609617157
DLEU2L	ZNF81	0.604335504
RP11-182I10	RBM15	0.632012742
RP11-182I10	ZBTB37	0.603567362
RP11-182I10	MDM4	0.630767384
RP11-182I10	ZNF124	0.612444885
RP11-182I10	ZBTB20	0.784798083
RP11-182I10	MATR3	0.66955055
RP11-182I10	SHPRH	0.651451138
RP11-182I10	HMBOX1	0.641801795
RP11-182I10	ZNF26	0.672479038
RP11-182I10	ZNF410	0.751216431
RP11-182I10	ZNF519	0.618000653
RP11-182I10	ZNF91	0.60366196
RP11-182I10	ZNF573	0.638000097
RP5-1044H5	ZNF124	0.625457777
RP5-1044H5	MATR3	0.647385149
RP5-1044H5	ZNF519	0.640313932
RP4-630A11	ZNF124	0.687444377
RP4-630A11	ZBTB20	0.700331062
RP4-630A11	MATR3	0.795289891
RP4-630A11	ZNF117	0.614793334
RP4-630A11	ZNF410	0.651682132
RP4-630A11	ZNF519	0.669368567
RP4-630A11	ZNF573	0.642408146
RP4-630A11	ZNF546	0.615120104
RP4-630A11	ZNF235	0.624192585
RP11-397C12	HOXD3	0.736727366
RP11-397C12	RUNX1T1	0.675835654
RP11-397C12	YAF2	0.602137574
RP11-397C12	HMGA2	0.693256723
RP4-598P13	ZBTB37	0.625405717
RP4-598P13	MDM4	0.667382568
RP4-598P13	ZNF124	0.629875393
RP4-598P13	ZBTB20	0.731328262
RP4-598P13	MATR3	0.797624084
RP4-598P13	ZNF410	0.702164271
RP4-598P13	ZNF519	0.64728559
RP4-598P13	ZNF91	0.639534456
RP4-598P13	ZNF573	0.620423199
RP4-598P13	ZNF546	0.629836896
RP4-598P13	ZNF235	0.622211183
RP11-342H21	ZBTB20	0.608189259
RP11-342H21	MATR3	0.86708049
RP11-342H21	ZNF410	0.604875498
RP11-342H21	ZNF519	0.632482435
RP11-342H21	ZNF546	0.657440789
RP11-342H21	ZNF283	0.608377792
RP4-677H15	RBM15	0.602594373
RP4-677H15	ZBTB37	0.72472459
RP4-677H15	MDM4	0.737206956
RP4-677H15	ZNF124	0.706875894
RP4-677H15	REL	0.626313313
RP4-677H15	ZBTB20	0.811524105
RP4-677H15	MATR3	0.910025453
RP4-677H15	SHPRH	0.641232701
RP4-677H15	DMTF1	0.614878897
RP4-677H15	HMBOX1	0.605323387
RP4-677H15	YAF2	0.649923617
RP4-677H15	ZNF26	0.637297341
RP4-677H15	ZNF410	0.739099237
RP4-677H15	RORA	0.629212555
RP4-677H15	ZNF519	0.72669227
RP4-677H15	PIAS2	0.624925735
RP4-677H15	ZNF493	0.640113843
RP4-677H15	ZNF91	0.706221175
RP4-677H15	ZNF573	0.665457651
RP4-677H15	ZNF546	0.663792061
RP4-677H15	ZNF235	0.612553661
RP11-180O5	ZBTB37	0.641227957
RP11-180O5	MDM4	0.687017727
RP11-180O5	ZBTB20	0.720047693
RP11-180O5	MATR3	0.744448478
RP11-180O5	SHPRH	0.633840198
RP11-180O5	DMTF1	0.631635314
RP11-180O5	HMBOX1	0.614979283
RP11-180O5	ZNF410	0.680409316
RP11-180O5	ZNF519	0.657786996
RP11-180O5	ZNF493	0.624234658
RP11-180O5	ZNF91	0.631100144
RP11-180O5	ZNF546	0.6366061
RP11-175G14	HOXD3	0.662524799
RP11-439H8	ZBTB37	0.698386913
RP11-439H8	MDM4	0.691074669
RP11-439H8	BAZ2B	0.636220784
RP11-439H8	ZBTB20	0.802324787
RP11-439H8	ZNF141	0.633484718
RP11-439H8	MATR3	0.753517435
RP11-439H8	SHPRH	0.679670535
RP11-439H8	DMTF1	0.62836987
RP11-439H8	HMBOX1	0.698065809
RP11-439H8	ZNF410	0.725168307
RP11-439H8	ZNF519	0.669891955
RP11-439H8	ZNF493	0.620386361
RP11-439H8	ZNF91	0.668563617
RP11-439H8	ZNF573	0.608796054
RP11-439H8	ZNF546	0.654903947
RP11-510C10	HMGA2	0.696772326
RP11-510C10	TBX2	0.614116555
RP4-682C21	NR2C2	0.604874582
RP4-682C21	ZNF141	0.615276485
RP4-682C21	SHPRH	0.61219997
RP4-682C21	DMTF1	0.636949486
RP4-682C21	NFAT5	0.600033559
NEXN-AS1	ZBTB20	0.691363635
NEXN-AS1	ZNF410	0.60724426
RP11-386I14	ERG	0.634799948
RP5-887A10	SP140	0.753340325
RP5-887A10	EOMES	0.605501905
RP5-887A10	HCLS1	0.604306871
RP5-887A10	TCF7	0.635225858
RP5-887A10	PAX5	0.757279103
RP5-887A10	POU2AF1	0.647891373
RP5-887A10	IRF8	0.629526707
RP5-887A10	POU2F2	0.750137957
RP5-837I24	HOXD3	0.685563367
RP5-837I24	RUNX1T1	0.670476513
RP5-837I24	VAX1	0.60431738
RP5-837I24	HMGA2	0.832507933
RP5-837I24	MEIS2	0.638773124
RP11-413G15	RBM15	0.611280036
RP11-413G15	ZNF124	0.622167768
RP11-413G15	ZBTB20	0.772555221
RP11-413G15	ZNF410	0.61286762
RP11-413G15	ZNF519	0.627542234
RP11-413G15	ZNF573	0.658974434
RP11-475O6	ZBTB20	0.683230858
RP11-475O6	ZNF410	0.611518793
RP11-475O6	ZNF573	0.612500699
RP11-131L23	RBM15	0.676949054
RP11-131L23	MDM4	0.665010807
RP11-131L23	ZNF124	0.700667117
RP11-131L23	ZBTB20	0.802584279
RP11-131L23	ZNF141	0.605636991
RP11-131L23	MATR3	0.786977178
RP11-131L23	SHPRH	0.678143629
RP11-131L23	DMTF1	0.637619633
RP11-131L23	HMBOX1	0.656312178
RP11-131L23	ZNF26	0.716891577
RP11-131L23	ZNF410	0.761249123
RP11-131L23	ZNF519	0.727292643
RP11-131L23	PIAS2	0.616414829
RP11-131L23	ZNF571	0.633569792
RP11-131L23	ZNF573	0.704624137
RP11-131L23	ZNF546	0.659342381
RP11-131L23	ZNF235	0.692720716
RP11-131L23	ZNF586	0.625593372
RP4-612B15	EPAS1	0.727271448
RP4-612B15	PPARG	0.749882845
RP4-612B15	MLXIPL	0.628748563
RP4-612B15	EBF2	0.648930799
RP4-612B15	HABP4	0.620708989
RP4-612B15	KLF4	0.612682086
RP4-612B15	EBF3	0.730061549
RP4-612B15	PTRF	0.697523584
RP4-612B15	CEBPA	0.644668924
RP4-612B15	ERG	0.620396804
RP4-604K5	RBM15	0.647820625
RP4-604K5	ZNF124	0.640542458
RP4-604K5	HOXD3	0.704102963
RP4-604K5	ZBTB20	0.718905388
RP4-604K5	SHPRH	0.611640281
RP4-604K5	RUNX1T1	0.65655225
RP4-604K5	HMGA2	0.616595007
RP4-604K5	ZNF519	0.623437074
RP5-1052I5	ZNF124	0.646570922
RP5-1052I5	ZBTB20	0.660192406
RP5-1052I5	MATR3	0.755424629
RP5-1052I5	ZNF519	0.666785799
RP11-413E1	RBM15	0.624742697
RP11-413E1	ZBTB37	0.646359376
RP11-413E1	MDM4	0.709169913
RP11-413E1	ZNF124	0.709989918
RP11-413E1	ZBTB20	0.827542193
RP11-413E1	MATR3	0.821287489
RP11-413E1	ZNF451	0.625852286
RP11-413E1	SHPRH	0.674465961
RP11-413E1	HMBOX1	0.601886952
RP11-413E1	ATM	0.626563375
RP11-413E1	YAF2	0.614834686
RP11-413E1	ZNF26	0.658945719
RP11-413E1	ZBTB25	0.619254781
RP11-413E1	ZNF410	0.713610258
RP11-413E1	RORA	0.637405982
RP11-413E1	NFAT5	0.627137122
RP11-413E1	ZNF519	0.717512664
RP11-413E1	PIAS2	0.618397997
RP11-413E1	ZNF564	0.657029716
RP11-413E1	ZNF493	0.637966776
RP11-413E1	ZNF91	0.627973068
RP11-413E1	ZNF573	0.694427251
RP11-413E1	ZNF546	0.627625497
RP11-413E1	ZNF235	0.632432665
RP4-717I23	MDM4	0.655019524
RP4-717I23	ZBTB20	0.692667133
RP4-717I23	MATR3	0.699581951
RP4-717I23	ZNF26	0.650872407
RP4-717I23	ZNF410	0.602476914
RP4-717I23	ZNF519	0.626924889
RP5-1033H22	ZBTB20	0.667592642
RP5-1033H22	ZNF410	0.635029104
RP11-86H7	MATR3	0.668224709
RP11-313A24	MDM4	0.63922202
RP11-313A24	ZNF124	0.633401879
RP11-313A24	HOXD3	0.608191038
RP11-313A24	ZBTB20	0.740717537
RP11-313A24	MATR3	0.662599305
RP11-313A24	SHPRH	0.639929092
RP11-313A24	RUNX1T1	0.625977114
RP11-313A24	ZNF410	0.643521236
RP11-313A24	ZNF519	0.631566334
RP11-313A24	ZNF91	0.604060076
RP11-57H12	HOXD3	0.712759359
RP11-57H12	FOXP2	0.654359216
RP11-57H12	RUNX1T1	0.752684618
RP11-57H12	HMGA2	0.782164247
RP11-57H12	MEIS2	0.702651754
RP11-57H12	TSHZ2	0.674069196
RP11-272L13	MDM4	0.641826773
RP11-272L13	ZNF124	0.692901501
RP11-272L13	ZBTB20	0.664031659
RP11-272L13	MATR3	0.732960909
RP11-272L13	ZNF117	0.648602677
RP11-272L13	YAF2	0.606813004
RP11-272L13	ZBTB25	0.600176543
RP11-272L13	ZNF410	0.627476918
RP11-272L13	ZNF519	0.61902368
RP11-272L13	ZNF91	0.621447206
MIR137HG	HOXD3	0.681209229
MIR137HG	RUNX1T1	0.656219644
MIR137HG	HMGA2	0.844812191
MIR137HG	MEIS2	0.647710167
RP11-490G2	HMGA2	0.716604209
RP5-1070A16	HOXD3	0.635732528
RP5-1070A16	RUNX1T1	0.618837316
RP5-1070A16	HMGA2	0.835162105
RP11-413P11	PHTF1	0.733852282
RP11-413P11	TRIM33	0.735614976
RP4-714D9	ZBTB37	0.685958521
RP4-714D9	MDM4	0.669054028
RP4-714D9	ZNF124	0.669636705
RP4-714D9	ZBTB20	0.739683035
RP4-714D9	MATR3	0.915594956
RP4-714D9	ZNF26	0.614357279
RP4-714D9	ZNF410	0.702531295
RP4-714D9	RORA	0.610318086
RP4-714D9	ZNF519	0.69004581
RP4-714D9	ZNF493	0.608246369
RP4-714D9	ZNF91	0.640435956
RP4-714D9	ZNF573	0.631673406
RP4-714D9	ZNF546	0.660801709
RP11-305E17	ZBTB20	0.71105422
RP11-305E17	SHPRH	0.612097462
RP11-305E17	ZNF483	0.606653757
RP11-305E17	ZNF26	0.61514323
RP11-305E17	ZNF410	0.651083303
RP11-421L21	ZNF124	0.632719987
RP11-421L21	ZBTB20	0.612864924
RP11-421L21	MATR3	0.751867349
RP4-575N6	EPAS1	0.640796595
RP4-575N6	PPARG	0.60772733
RP4-575N6	SOX17	0.6047255
RP4-575N6	EBF3	0.601115952
RP4-575N6	FLI1	0.662076881
RP4-575N6	ERG	0.688218943
RP11-475E11	RBM15	0.67508361
RP11-475E11	ZBTB37	0.709864986
RP11-475E11	MDM4	0.695684842
RP11-475E11	ZNF124	0.676566953
RP11-475E11	BAZ2B	0.665456932
RP11-475E11	ZBTB20	0.882412472
RP11-475E11	ZNF141	0.65874181
RP11-475E11	MATR3	0.792256331
RP11-475E11	SHPRH	0.7362431
RP11-475E11	HMBOX1	0.73280597
RP11-475E11	ZNF483	0.638904531
RP11-475E11	ZNF26	0.729460616
RP11-475E11	ZNF410	0.819225637
RP11-475E11	RORA	0.611073821
RP11-475E11	NFAT5	0.606356317
RP11-475E11	ZNF519	0.700843517
RP11-475E11	ZNF236	0.611376803
RP11-475E11	ZNF564	0.661388585
RP11-475E11	ZNF91	0.662183593
RP11-475E11	ZNF571	0.622928616
RP11-475E11	ZNF573	0.739610974
RP11-475E11	ZNF546	0.66522332
RP11-475E11	ZNF235	0.684297537
RP11-475E11	ZNF586	0.648308105
RP11-475E11	ZNF81	0.63703645
RP5-1065J22	ZBTB37	0.619999064
RP5-1065J22	MDM4	0.634563467
RP5-1065J22	ZNF124	0.696916266
RP5-1065J22	ZBTB20	0.735728713
RP5-1065J22	MATR3	0.83439462
RP5-1065J22	ZNF451	0.606395215
RP5-1065J22	SHPRH	0.626294254
RP5-1065J22	ZNF26	0.629105959
RP5-1065J22	ZNF410	0.710961049
RP5-1065J22	RORA	0.607787425
RP5-1065J22	ZNF519	0.718240582
RP5-1065J22	PIAS2	0.625748431
RP5-1065J22	ZNF493	0.626206482
RP5-1065J22	ZNF91	0.612228163
RP5-1065J22	ZNF382	0.614140392
RP5-1065J22	ZNF571	0.634348483
RP5-1065J22	ZNF573	0.703140774
RP5-1065J22	ZNF546	0.688064894
RP5-1065J22	ZNF235	0.678220166
SCARNA2	HIST1H2BB	0.913401857
RP5-1074L1	MDM4	0.623736195
RP5-1074L1	MATR3	0.645043305
RP5-1074L1	DMTF1	0.673564819
RP5-1074L1	ZNF26	0.624125431
RP5-1074L1	ZNF519	0.603581127
RP11-284N8	GFI1	0.748487643
RP11-284N8	SP140	0.822562403
RP11-284N8	EOMES	0.811682354
RP11-284N8	HCLS1	0.658286179
RP11-284N8	IRF4	0.717387473
RP11-284N8	PRDM1	0.62606237
RP11-284N8	TFEC	0.664603912
RP11-284N8	PAX5	0.634125264
RP11-284N8	POU2AF1	0.711515245
RP11-284N8	IRF8	0.717400094
RP11-284N8	TBX21	0.716187855
RP11-284N8	POU2F2	0.727312494
RP11-96K19	ELK4	0.600885218
RP11-96K19	ZNF124	0.616040298
RP11-96K19	MATR3	0.626680732
RP11-96K19	ZNF117	0.636921708
RP11-96K19	ZNF91	0.620223224
RP11-552M11	ZBTB20	0.619274723
RP11-552M11	SHPRH	0.626267542
RP5-965F6	EPAS1	0.855237521
RP5-965F6	PPARG	0.839676422
RP5-965F6	KLF15	0.687034971
RP5-965F6	NR3C1	0.724687941
RP5-965F6	MLXIPL	0.699821674
RP5-965F6	EBF2	0.750526094
RP5-965F6	KLF9	0.621841249
RP5-965F6	HABP4	0.639435127
RP5-965F6	KLF4	0.688610268
RP5-965F6	LHX6	0.605971307
RP5-965F6	EBF3	0.825044072
RP5-965F6	TEAD1	0.636664425
RP5-965F6	FLI1	0.61417361
RP5-965F6	TBC1D2B	0.62261311
RP5-965F6	STAT5B	0.642763806
RP5-965F6	STAT5A	0.604307242
RP5-965F6	PTRF	0.779974937
RP5-965F6	EZH1	0.702904732
RP5-965F6	CEBPA	0.737129602
RP5-965F6	ERG	0.75805775
RP11-31F15	ZBTB20	0.600748251
RP5-1073O3	ZBTB20	0.605675864
RP5-1073O3	MATR3	0.640928184
RP4-590F24	SMYD1	0.694451554
RP4-590F24	BIN1	0.668501289
RP4-590F24	MEF2C	0.65149569
RP4-590F24	ANKRD1	0.657189816
RP4-666F24	FOXN4	0.735475341
RP11-159M11	MDM4	0.609101806
RP11-159M11	ZBTB20	0.831170102
RP11-159M11	MATR3	0.623552147
RP11-159M11	HMBOX1	0.70326974
RP11-159M11	ZNF410	0.651254636
RP11-159M11	ZNF519	0.632498773
RP4-675C20	ZBTB37	0.689251752
RP4-675C20	MDM4	0.671681102
RP4-675C20	ZNF124	0.6119583
RP4-675C20	ZBTB20	0.682062046
RP4-675C20	MATR3	0.870223347
RP4-675C20	PURA	0.644566162
RP4-675C20	ZNF451	0.605503896
RP4-675C20	SHPRH	0.607808391
RP4-675C20	ZNF117	0.614687612
RP4-675C20	ZDHHC21	0.653808926
RP4-675C20	ATM	0.615727537
RP4-675C20	ZBTB25	0.627969171
RP4-675C20	ZNF410	0.694128478
RP4-675C20	RORA	0.63029965
RP4-675C20	ZNF519	0.616239659
RP4-675C20	PIAS2	0.602514254
RP4-675C20	ZNF493	0.683571348
RP4-675C20	ZNF91	0.709958702
RP4-675C20	ZNF573	0.614975083
RP4-675C20	ZNF546	0.655586216
RP5-1042I8	NOTCH2	0.621662829
RP11-14N7	HIC1	0.614232687
RP11-289H16	HOXD3	0.759136279
RP11-289H16	RUNX1T1	0.669692797
RP11-289H16	HMGA2	0.695698137
CH17-373J23	ZBTB37	0.664446786
CH17-373J23	ZNF124	0.640461344
CH17-373J23	REL	0.636178037
CH17-373J23	BAZ2B	0.618581491
CH17-373J23	ZBTB20	0.779497605
CH17-373J23	MATR3	0.600494859
CH17-373J23	HMBOX1	0.622129937
CH17-373J23	ZNF410	0.625661907
CH17-373J23	ZNF91	0.646509028
RP6-74O6	MDM4	0.630438901
RP6-74O6	MATR3	0.644102973
RP6-74O6	ZNF26	0.617884178
RP4-791M13	ZBTB20	0.602227793
RP4-791M13	MATR3	0.660757562
ADAMTSL4-AS1	ZBTB37	0.626378697
ADAMTSL4-AS1	MDM4	0.609723313
ADAMTSL4-AS1	BAZ2B	0.603417327
ADAMTSL4-AS1	ZBTB20	0.771374863
ADAMTSL4-AS1	SHPRH	0.631931625
ADAMTSL4-AS1	HMBOX1	0.732473015
ADAMTSL4-AS1	ZNF26	0.619848275
ADAMTSL4-AS1	ZNF410	0.73664461
ADAMTSL4-AS1	ZNF571	0.678784472
ADAMTSL4-AS1	ZNF573	0.721902973
ADAMTSL4-AS1	ZNF546	0.611535133
ADAMTSL4-AS1	ZNF235	0.661172789
RP11-68I18	MATR3	0.608021031
RP11-68I18	ZNF410	0.657968581
RP11-68I18	ZNF571	0.682644582
RP11-68I18	ZNF573	0.642820597
RP11-68I18	ZNF546	0.67536459
RP11-68I18	ZNF235	0.688737606
RP11-74C1	ZBTB37	0.626676157
RP11-74C1	MATR3	0.670070072
RP11-74C1	ZNF410	0.626934608
RP11-107M16	ZNF124	0.639544465
RP11-107M16	HOXD3	0.69191506
RP11-107M16	ZBTB20	0.63072387
RP11-107M16	MATR3	0.648727903
RP11-107M16	RUNX1T1	0.642841468
RP11-107M16	HMGA2	0.628502918
RP11-107M16	ZNF519	0.628853999
RP11-107M16	ZNF235	0.627585259
LINC00302	POU3F1	0.758115441
LINC00302	SOX21	0.689616921
RP1-20N18	SIM1	0.717543805
RP11-216N14	RBM15	0.619550075
RP11-216N14	ZBTB20	0.669413454
RP11-216N14	ZNF571	0.719176777
RP11-216N14	ZNF573	0.686993203
RP11-216N14	ZNF235	0.731155901
RP11-307C12	BOLA1	0.632756612
RP11-307C12	NFKBIL1	0.645672134
RP11-307C12	RING1	0.61102299
RP11-307C12	EDF1	0.617351794
RP11-307C12	MBD3	0.611462995
RP11-307C12	ZNF524	0.603455197
RP11-307C12	THAP7	0.653775378
RUSC1-AS1	GABPB2	0.612259061
RUSC1-AS1	MDM4	0.699900099
RUSC1-AS1	DMTF1	0.647969148
RP11-243J18	ZBTB37	0.689161106
RP11-243J18	MDM4	0.686876986
RP11-243J18	ELK4	0.613211923
RP11-243J18	ZNF124	0.687707267
RP11-243J18	REL	0.635235238
RP11-243J18	ZBTB20	0.753602135
RP11-243J18	MATR3	0.867297015
RP11-243J18	SHPRH	0.603248866
RP11-243J18	YAF2	0.604332549
RP11-243J18	ZNF26	0.619079881
RP11-243J18	ZNF410	0.663204115
RP11-243J18	RORA	0.603477508
RP11-243J18	ZNF519	0.711034281
RP11-243J18	PIAS2	0.622664386
RP11-243J18	ZNF493	0.613308067
RP11-243J18	ZNF91	0.676317897
RP11-243J18	ZNF382	0.631947285
RP11-243J18	ZNF573	0.645108566
RP11-243J18	ZNF546	0.611977275
RP11-336K24	MDM4	0.600673374
RP11-367J7	ATM	0.630130784
RP11-574F21	ASH1L	0.657388277
RP11-574F21	ZBTB37	0.711754881
RP11-574F21	MDM4	0.725172166
RP11-574F21	REL	0.659147142
RP11-574F21	ZBTB20	0.621469942
RP11-574F21	ZNF141	0.607338594
RP11-574F21	DMTF1	0.621782398
RP11-574F21	ZBTB25	0.603920255
RP11-574F21	ZNF410	0.604482677
RP11-574F21	ZNF236	0.621486466
RP11-574F21	ZNF493	0.602379169
RP11-574F21	ZNF91	0.64669614
RP11-574F21	ZNF546	0.601411459
RP11-404F10	HOXD11	0.784575134
RP11-404F10	CDX2	0.604662598
RP11-544M22	ZBTB37	0.618352057
RP11-544M22	MDM4	0.654861438
RP11-544M22	ZBTB20	0.767941604
RP11-544M22	HMBOX1	0.690408206
RP11-544M22	ZNF410	0.642100564
RP11-544M22	ZNF571	0.611284237
RP11-544M22	ZNF573	0.641129285
RP11-122G18	ZBTB37	0.732868082
RP11-122G18	MDM4	0.765476568
RP11-122G18	ZNF124	0.643053771
RP11-122G18	BAZ2B	0.612375731
RP11-122G18	ZBTB20	0.835762758
RP11-122G18	MATR3	0.895455664
RP11-122G18	SHPRH	0.668961143
RP11-122G18	DMTF1	0.606849909
RP11-122G18	HMBOX1	0.659608964
RP11-122G18	ZNF26	0.629510405
RP11-122G18	ZBTB25	0.616843729
RP11-122G18	ZNF410	0.754011527
RP11-122G18	RORA	0.61953533
RP11-122G18	ZNF519	0.712326543
RP11-122G18	ZNF564	0.637276086
RP11-122G18	ZNF493	0.674084996
RP11-122G18	ZNF91	0.689319802
RP11-122G18	ZNF573	0.660606637
RP11-122G18	ZNF546	0.695348466
RP11-122G18	ZNF283	0.601382749
RP11-122G18	ZNF235	0.611598532
RP11-565P22	MDM4	0.638397823
RP11-565P22	BAZ2B	0.624512612
RP11-565P22	ZBTB20	0.83513125
RP11-565P22	MATR3	0.611468829
RP11-565P22	SHPRH	0.656087282
RP11-565P22	HMBOX1	0.711272482
RP11-565P22	ZNF26	0.608212496
RP11-565P22	ZNF410	0.695719125
RP11-565P22	ZNF519	0.657353776
RP11-565P22	ZNF564	0.61232742
RP11-565P22	ZNF586	0.606365712
RP11-267N12	RBM15	0.626657917
RP11-267N12	ZBTB37	0.650090702
RP11-267N12	MDM4	0.635618312
RP11-267N12	ZNF124	0.630701003
RP11-267N12	REL	0.602049435
RP11-267N12	ZBTB20	0.840388365
RP11-267N12	MATR3	0.753029449
RP11-267N12	SHPRH	0.62085613
RP11-267N12	HMBOX1	0.641137534
RP11-267N12	ZNF26	0.611695448
RP11-267N12	ZNF410	0.686601799
RP11-267N12	ZNF519	0.726938113
RP11-267N12	ZNF571	0.610771848
RP11-267N12	ZNF573	0.680484585
RP11-267N12	ZNF546	0.629243366
RP11-267N12	ZNF235	0.663220371
RP11-77M5	ZBTB37	0.629918919
RP11-77M5	MDM4	0.641615007
RP11-77M5	REL	0.641401961
RP11-77M5	ZBTB20	0.756362144
RP11-77M5	MATR3	0.622767809
RP11-77M5	HMBOX1	0.612356483
RP11-77M5	ZNF410	0.622091835
RP11-77M5	ZNF519	0.639331607
RP11-77M5	ZNF573	0.620692353
RP11-477H21	MATR3	0.639401147
RP11-506O24	ZBTB37	0.735589124
RP11-506O24	MDM4	0.742973718
RP11-506O24	BAZ2B	0.614021045
RP11-506O24	ZBTB20	0.827599321
RP11-506O24	MATR3	0.878663392
RP11-506O24	SHPRH	0.639230493
RP11-506O24	HMBOX1	0.65633246
RP11-506O24	ZNF26	0.620324102
RP11-506O24	ZNF410	0.758484761
RP11-506O24	RORA	0.60390133
RP11-506O24	ZNF519	0.642113789
RP11-506O24	ZNF564	0.643191599
RP11-506O24	ZNF493	0.641265897
RP11-506O24	ZNF91	0.696004378
RP11-506O24	ZNF546	0.665585934
RP11-525G13	RBM15	0.691632481
RP11-525G13	ZBTB37	0.627527765
RP11-525G13	MDM4	0.671644584
RP11-525G13	ZNF124	0.708441089
RP11-525G13	NR2C2	0.607624386
RP11-525G13	ZBTB20	0.778078431
RP11-525G13	ZNF141	0.642852142
RP11-525G13	MATR3	0.735560495
RP11-525G13	SHPRH	0.725990885
RP11-525G13	DMTF1	0.652472254
RP11-525G13	HMBOX1	0.632965604
RP11-525G13	ZNF26	0.690344971
RP11-525G13	ZNF410	0.733545253
RP11-525G13	NFAT5	0.640415622
RP11-525G13	ZNF519	0.728156884
RP11-525G13	ZNF236	0.621305458
RP11-525G13	ZNF564	0.619212615
RP11-525G13	ZNF571	0.625458466
RP11-525G13	ZNF573	0.743005052
RP11-525G13	ZNF546	0.635677673
RP11-525G13	ZNF235	0.701851923
RP11-525G13	ZNF81	0.635011686
RP11-9L18	RBM15	0.619030366
RP11-9L18	ZNF124	0.681861397
RP11-9L18	ZBTB20	0.707284893
RP11-9L18	MATR3	0.743094318
RP11-9L18	ZNF519	0.716863101
RP11-479J7	E2F2	0.659062621
RP11-52A20	RBM15	0.637863069
RP11-52A20	ZBTB37	0.72178832
RP11-52A20	MDM4	0.742105541
RP11-52A20	ZNF124	0.725242639
RP11-52A20	BAZ2B	0.634944296
RP11-52A20	ZBTB20	0.871872486
RP11-52A20	ZNF141	0.649825625
RP11-52A20	MATR3	0.91401228
RP11-52A20	ZNF451	0.622680239
RP11-52A20	SHPRH	0.74935798
RP11-52A20	DMTF1	0.641470961
RP11-52A20	HMBOX1	0.648326163
RP11-52A20	ZNF483	0.632988652
RP11-52A20	YAF2	0.642330246
RP11-52A20	ZNF26	0.723906397
RP11-52A20	ZBTB25	0.627049267
RP11-52A20	ZNF410	0.806077714
RP11-52A20	RORA	0.67550721
RP11-52A20	NFAT5	0.643408662
RP11-52A20	ZNF519	0.777116581
RP11-52A20	PIAS2	0.67535696
RP11-52A20	ZNF564	0.688364477
RP11-52A20	ZNF493	0.672383016
RP11-52A20	ZNF91	0.715133625
RP11-52A20	ZNF573	0.722788364
RP11-52A20	ZNF546	0.689271529
RP11-52A20	ZNF283	0.609037634
RP11-52A20	ZNF235	0.639506968
RP11-52A20	ZNF586	0.623951572
RP11-52A20	BRWD1	0.612185527
RP3-455J7	POU2F2	0.60534712
RP4-800F24	ZBTB37	0.683027091
RP4-800F24	MDM4	0.744115755
RP4-800F24	ZBTB20	0.814382947
RP4-800F24	MATR3	0.836846284
RP4-800F24	SHPRH	0.647689571
RP4-800F24	HMBOX1	0.655008546
RP4-800F24	ZNF26	0.610622129
RP4-800F24	ZBTB25	0.616448943
RP4-800F24	ZNF410	0.775750728
RP4-800F24	ZNF519	0.66335667
RP4-800F24	ZNF564	0.627522612
RP4-800F24	ZNF493	0.661143538
RP4-800F24	ZNF91	0.69941922
RP4-800F24	ZNF573	0.618148626
RP4-800F24	ZNF546	0.660986239
RP1-206D15	ZBTB37	0.722446274
RP1-206D15	MDM4	0.703113211
RP1-206D15	ZBTB20	0.644153077
RP1-206D15	MATR3	0.85310603
RP1-206D15	ZNF410	0.714250693
RP1-206D15	ZNF493	0.647696499
RP1-206D15	ZNF91	0.686600234
RP1-206D15	ZNF546	0.667040649
RP11-332H17	ZNF124	0.602943978
RP11-332H17	ZBTB20	0.621919133
RP11-332H17	MATR3	0.862811114
RP11-332H17	ZNF410	0.60658375
RP11-332H17	ZNF519	0.640537323
RP11-332H17	ZNF546	0.657360768
RP11-545I10	MATR3	0.612286065
RP3-471M13	MATR3	0.754432886
RP3-395P12	ZBTB20	0.725808338
RP3-395P12	ZNF519	0.621084704
RP11-296O14	RBM15	0.627551812
RP11-296O14	MDM4	0.696018052
RP11-296O14	ZNF124	0.712293641
RP11-296O14	ZBTB20	0.853985207
RP11-296O14	MATR3	0.744770938
RP11-296O14	SHPRH	0.658197276
RP11-296O14	DMTF1	0.601365085
RP11-296O14	HMBOX1	0.621602927
RP11-296O14	ZNF410	0.666422314
RP11-296O14	ZNF519	0.738922582
RP11-296O14	ZNF564	0.614589307
RP11-296O14	ZNF573	0.662797204
GAS5-AS1	ZBTB37	0.690529327
GAS5-AS1	MDM4	0.712248553
GAS5-AS1	ZBTB20	0.619669913
GAS5-AS1	ZBTB25	0.606090792
GAS5-AS1	ZNF546	0.628265641
RP1-102G20	ZBTB37	0.683111719
RP1-102G20	MDM4	0.717373735
RP1-102G20	ZNF124	0.655896244
RP1-102G20	REL	0.68304808
RP1-102G20	ZBTB20	0.839427303
RP1-102G20	MATR3	0.718300678
RP1-102G20	SHPRH	0.630313907
RP1-102G20	HMBOX1	0.620460151
RP1-102G20	ZNF26	0.632572047
RP1-102G20	ZNF410	0.702140231
RP1-102G20	NFAT5	0.605311967
RP1-102G20	ZNF519	0.68631009
RP1-102G20	ZNF91	0.67076946
RP1-102G20	ZNF571	0.600592637
RP1-102G20	ZNF573	0.688797683
RP11-492I21	RBM15	0.606919821
RP11-492I21	ZBTB37	0.721294217
RP11-492I21	MDM4	0.766102318
RP11-492I21	ZNF124	0.713174058
RP11-492I21	BAZ2B	0.616977702
RP11-492I21	ZBTB20	0.851747941
RP11-492I21	ZNF141	0.634238019
RP11-492I21	MATR3	0.890681151
RP11-492I21	ZNF451	0.626471062
RP11-492I21	SHPRH	0.720214611
RP11-492I21	DMTF1	0.654656467
RP11-492I21	HMBOX1	0.666868877
RP11-492I21	ATM	0.619025881
RP11-492I21	YAF2	0.627833872
RP11-492I21	ZNF26	0.688713397
RP11-492I21	ZBTB25	0.652698094
RP11-492I21	ZNF410	0.788635356
RP11-492I21	RORA	0.643299098
RP11-492I21	NFAT5	0.626131191
RP11-492I21	ZNF519	0.748972402
RP11-492I21	PIAS2	0.648456407
RP11-492I21	ZNF564	0.645161322
RP11-492I21	ZNF493	0.685618285
RP11-492I21	ZNF91	0.717361497
RP11-492I21	ZNF571	0.612139251
RP11-492I21	ZNF573	0.728217524
RP11-492I21	ZNF546	0.706344544
RP11-492I21	ZNF283	0.609878531
RP11-492I21	ZNF235	0.680101834
RP11-195C7	ZNF571	0.604569705
RP4-798P15	ZBTB37	0.679673579
RP4-798P15	MDM4	0.694413887
RP4-798P15	BAZ2B	0.651682183
RP4-798P15	ZBTB20	0.770363542
RP4-798P15	ZNF141	0.601073312
RP4-798P15	MATR3	0.768901319
RP4-798P15	SHPRH	0.704640003
RP4-798P15	DMTF1	0.666261187
RP4-798P15	HMBOX1	0.730816133
RP4-798P15	ATM	0.610196046
RP4-798P15	ZNF410	0.732030814
RP4-798P15	NFAT5	0.630809504
RP4-798P15	ZNF519	0.681437328
RP4-798P15	ZNF493	0.665043414
RP4-798P15	ZNF573	0.692434561
RP4-798P15	ZNF546	0.718298538
RP4-798P15	ZNF235	0.65763344
RP11-21M7	RBM15	0.662427591
RP11-21M7	ZBTB37	0.649886052
RP11-21M7	MDM4	0.646710522
RP11-21M7	ZNF124	0.697551882
RP11-21M7	REL	0.643887203
RP11-21M7	ZBTB20	0.866446643
RP11-21M7	MATR3	0.741145692
RP11-21M7	SHPRH	0.660417134
RP11-21M7	HMBOX1	0.66429945
RP11-21M7	ZNF26	0.616665007
RP11-21M7	ZNF410	0.712200427
RP11-21M7	NFAT5	0.600300056
RP11-21M7	ZNF519	0.728339904
RP11-21M7	ZNF91	0.623995412
RP11-21M7	ZNF571	0.61202887
RP11-21M7	ZNF573	0.708787514
RP11-21M7	ZNF235	0.645955691
C1orf220	ZBTB37	0.631884661
C1orf220	MDM4	0.688872067
C1orf220	HMBOX1	0.604035108
C1orf220	ZNF236	0.618433449
RP11-545A16	ZBTB20	0.61525394
RP11-545A16	ZNF410	0.611812384
RP11-46A10	RBM15	0.66562542
RP11-46A10	ZNF124	0.665637671
RP11-46A10	ZBTB20	0.802504962
RP11-46A10	SHPRH	0.683863597
RP11-46A10	HMBOX1	0.683471884
RP11-46A10	ZNF26	0.621894629
RP11-46A10	ZNF410	0.688190338
RP11-46A10	ZNF519	0.663605631
RP11-46A10	ZNF236	0.636779906
RP11-46A10	ZNF571	0.601699028
RP11-46A10	ZNF573	0.734675587
RP11-46A10	ZNF235	0.641394284
RP11-46A10	ZNF81	0.610568007
GS1-122H1	ZBTB20	0.606528938
GS1-122H1	HMBOX1	0.638303582
GS1-122H1	ZNF410	0.629901142
RP11-181K3	ZBTB37	0.617429438
RP11-181K3	BAZ2B	0.65253476
RP11-181K3	ZBTB20	0.704407726
RP11-181K3	MATR3	0.706875919
RP11-181K3	SHPRH	0.715943744
RP11-181K3	DMTF1	0.625917806
RP11-181K3	HMBOX1	0.656707274
RP11-181K3	ZNF26	0.6046483
RP11-181K3	ZNF410	0.646345652
RP11-181K3	RORA	0.62752022
RP11-181K3	NFAT5	0.703857039
RP11-181K3	ZNF519	0.653912526
RP11-181K3	ZNF573	0.629375988
RP11-181K3	ZNF546	0.616907241
GS1-115G20	ZBTB37	0.673768738
GS1-115G20	MDM4	0.700267011
GS1-115G20	ZBTB20	0.714753374
GS1-115G20	MATR3	0.763792954
GS1-115G20	ZNF26	0.614364282
GS1-115G20	ZNF410	0.724153573
GS1-115G20	ZNF91	0.612743407
RP4-635A23	ZBTB20	0.679369791
RP4-635A23	ZNF519	0.63496989
RP4-635A23	ZNF573	0.642747441
GS1-174L6	HOXD3	0.716594113
GS1-174L6	RUNX1T1	0.751462639
GS1-174L6	HMGA2	0.691869649
GS1-174L6	MEIS2	0.652543587
RP11-295K2	ZNF124	0.660000526
RP11-295K2	ZBTB20	0.611398603
RP11-295K2	MATR3	0.674216239
RP11-295K2	ZNF519	0.651105111
RP11-21J7	ZBTB20	0.665901654
RP11-98G13	ZNF124	0.617097327
RP11-98G13	ZBTB20	0.627924338
RP11-98G13	MATR3	0.725729001
RP11-98G13	ZNF519	0.604116271
RP11-553K8	ELK4	0.647022519
RP11-553K8	ZBTB20	0.614463189
RP11-553K8	ZNF117	0.655290085
RP11-553K8	ZNF382	0.61821225
MIR181A1HG	RBM15	0.633124254
MIR181A1HG	MDM4	0.663829461
MIR181A1HG	ZNF124	0.703525674
MIR181A1HG	ZBTB20	0.816612065
MIR181A1HG	MATR3	0.731512159
MIR181A1HG	SHPRH	0.659159729
MIR181A1HG	DMTF1	0.615578939
MIR181A1HG	HMBOX1	0.616733771
MIR181A1HG	ZNF410	0.668907745
MIR181A1HG	ZNF519	0.714172363
MIR181A1HG	ZNF91	0.621305037
MIR181A1HG	ZNF573	0.636074118
RP11-469A15	NR2E1	0.601837053
RP11-25B7	ZBTB20	0.755913361
RP11-25B7	SHPRH	0.651988959
RP11-25B7	HMBOX1	0.656783196
RP11-25B7	ZNF26	0.646816699
RP11-25B7	ZNF410	0.726680704
RP11-25B7	ZNF571	0.641428358
RP11-25B7	ZNF573	0.677066934
RP11-25B7	ZNF235	0.665396112
RP11-25B7	ZNF586	0.622645465
RP11-90L20	RBM15	0.652757747
RP11-90L20	ZBTB37	0.681617168
RP11-90L20	MDM4	0.697673567
RP11-90L20	ZNF124	0.702970777
RP11-90L20	REL	0.615054476
RP11-90L20	BAZ2B	0.620987074
RP11-90L20	ZBTB20	0.839672626
RP11-90L20	MATR3	0.828856405
RP11-90L20	SHPRH	0.714840175
RP11-90L20	DMTF1	0.639818153
RP11-90L20	HMBOX1	0.666115488
RP11-90L20	ZNF26	0.697017744
RP11-90L20	ZNF410	0.773052843
RP11-90L20	RORA	0.619450164
RP11-90L20	NFAT5	0.656109513
RP11-90L20	ZNF519	0.763648136
RP11-90L20	PIAS2	0.619247706
RP11-90L20	ZNF493	0.625721787
RP11-90L20	ZNF91	0.662822642
RP11-90L20	ZNF382	0.600680429
RP11-90L20	ZNF571	0.645339388
RP11-90L20	ZNF573	0.728499459
RP11-90L20	ZNF546	0.666598558
RP11-90L20	ZNF235	0.6959161
RP11-335O13	ZNF483	0.631428972
RP11-739N20	ZBTB20	0.688132219
RP11-739N20	MATR3	0.644509929
RP11-739N20	ZNF519	0.663521911
RP11-739N20	ZNF573	0.60738712
RP11-739N20	ZNF235	0.642795963
RP11-23I7	ZBTB37	0.621930734
RP11-23I7	MDM4	0.679387005
RP11-23I7	ZBTB20	0.870528806
RP11-23I7	MATR3	0.65543562
RP11-23I7	SHPRH	0.638498406
RP11-23I7	HMBOX1	0.66087924
RP11-23I7	ZNF410	0.690458927
RP11-23I7	ZNF519	0.669542023
RP11-23I7	ZNF564	0.631877943
RP11-23I7	ZNF586	0.600512311
RP11-383G10	ZNF382	0.634900338
C1orf147	ZBTB20	0.632030503
CH17-76K2	ZBTB20	0.758821784
CH17-76K2	HMBOX1	0.631397027
CH17-76K2	ZNF410	0.608038588
CH17-76K2	ZNF519	0.613917523
RP11-164O23	MDM4	0.622797182
RP11-164O23	ZBTB20	0.615733244
RP11-164O23	MATR3	0.718697616
RP11-164O23	ZNF91	0.64306216
RP11-6J21	ZBTB37	0.713008194
RP11-6J21	MDM4	0.760581115
RP11-6J21	ZNF124	0.626192062
RP11-6J21	REL	0.602363027
RP11-6J21	ZBTB20	0.815010225
RP11-6J21	MATR3	0.876181555
RP11-6J21	PURA	0.613242323
RP11-6J21	SHPRH	0.650026279
RP11-6J21	HMBOX1	0.617721518
RP11-6J21	ZNF26	0.602537281
RP11-6J21	ZBTB25	0.617342012
RP11-6J21	ZNF410	0.740926199
RP11-6J21	RORA	0.61567048
RP11-6J21	ZNF519	0.698831406
RP11-6J21	ZNF493	0.661466114
RP11-6J21	ZNF91	0.712927289
RP11-6J21	ZNF573	0.624138511
RP11-6J21	ZNF546	0.65887584
RP11-78B10	ELK4	0.617089444
RP11-78B10	ZNF117	0.624612037
RP11-78B10	ZNF382	0.618272425
RP11-328D5	ZBTB20	0.707301265
RP1-28O10	EPAS1	0.790094736
RP1-28O10	PPARG	0.851864235
RP1-28O10	KLF15	0.642295321
RP1-28O10	NR3C1	0.608067871
RP1-28O10	MLXIPL	0.693947999
RP1-28O10	EBF2	0.652272875
RP1-28O10	SOX17	0.615026729
RP1-28O10	HABP4	0.667014853
RP1-28O10	KLF4	0.626812063
RP1-28O10	EBF3	0.768100691
RP1-28O10	PTRF	0.769257757
RP1-28O10	EZH1	0.626705106
RP1-28O10	CEBPA	0.798915716
RP1-28O10	ERG	0.681124804
RP1-28O10	TFE3	0.602847502
RP11-384C4	ZBTB37	0.746057444
RP11-384C4	MDM4	0.769658703
RP11-384C4	ZNF124	0.643414527
RP11-384C4	ZBTB20	0.80340364
RP11-384C4	MATR3	0.917480344
RP11-384C4	PURA	0.625063789
RP11-384C4	SHPRH	0.643255328
RP11-384C4	HMBOX1	0.629439394
RP11-384C4	YAF2	0.606591968
RP11-384C4	ZNF26	0.657321998
RP11-384C4	ZBTB25	0.642433524
RP11-384C4	ZNF410	0.790108919
RP11-384C4	RORA	0.645273231
RP11-384C4	ZNF519	0.686531058
RP11-384C4	PIAS2	0.616184511
RP11-384C4	ZNF493	0.675618285
RP11-384C4	ZNF91	0.737002445
RP11-384C4	ZNF573	0.641926321
RP11-384C4	ZNF546	0.704095172
RP11-384C4	ZNF283	0.600672454
LINC00538	HMGA2	0.674411673
RP11-176D17	ZBTB20	0.729821353
RP11-176D17	ZNF519	0.602202924
RP5-1099E6	MATR3	0.62198583
C1orf143	ZIC3	0.699361824
RP11-135J2	ZBTB37	0.737889835
RP11-135J2	MDM4	0.75095955
RP11-135J2	ZNF124	0.630605479
RP11-135J2	REL	0.679401258
RP11-135J2	BAZ2B	0.649882361
RP11-135J2	ZBTB20	0.905243703
RP11-135J2	ZNF141	0.611032538
RP11-135J2	MATR3	0.729496176
RP11-135J2	SHPRH	0.708319232
RP11-135J2	HMBOX1	0.734400964
RP11-135J2	ZNF26	0.626225981
RP11-135J2	ZNF410	0.764759666
RP11-135J2	NFAT5	0.612850805
RP11-135J2	ZNF519	0.688125615
RP11-135J2	ZNF564	0.645306487
RP11-135J2	ZNF493	0.631252325
RP11-135J2	ZNF91	0.715249782
RP11-135J2	ZNF571	0.613295857
RP11-135J2	ZNF573	0.724885607
RP11-135J2	ZNF546	0.634340587
RP11-135J2	ZNF235	0.629793446
RP11-135J2	ZNF81	0.621583446
RP11-392O17	MDM4	0.676884971
RP11-392O17	ZBTB20	0.629826271
RP11-392O17	DMTF1	0.604486994
RP11-392O17	ZNF26	0.64342447
RP11-392O17	ZNF519	0.630545484
RP11-95P13	HMGA2	0.643733938
RP11-191N8	MATR3	0.600004063
RP11-400N13	ZIC3	0.742721372
RP11-378J18	ZBTB37	0.613687294
RP11-378J18	MDM4	0.694540455
RP11-378J18	ZBTB20	0.813760619
RP11-378J18	MATR3	0.618050175
RP11-378J18	SHPRH	0.616940836
RP11-378J18	HMBOX1	0.658633264
RP11-378J18	ZNF410	0.646020429
RP11-378J18	ZNF519	0.620166082
RP11-378J18	ZNF91	0.605742035
RP11-455P21	ZBTB37	0.645160216
RP11-455P21	MDM4	0.650295561
RP11-455P21	REL	0.635796546
RP11-455P21	BAZ2B	0.62861589
RP11-455P21	ZBTB20	0.813977756
RP11-455P21	SHPRH	0.654886867
RP11-455P21	HMBOX1	0.703245365
RP11-455P21	ZNF410	0.693592402
RP11-455P21	ZNF91	0.63257224
RP11-455P21	ZNF573	0.606034958
RP11-365O16	RBM15	0.604573266
RP11-365O16	ZBTB37	0.710820849
RP11-365O16	MDM4	0.761331706
RP11-365O16	ZNF124	0.633252011
RP11-365O16	REL	0.606677509
RP11-365O16	BAZ2B	0.647789834
RP11-365O16	ZBTB20	0.924165525
RP11-365O16	ZNF141	0.634774285
RP11-365O16	MATR3	0.810488432
RP11-365O16	SHPRH	0.69334248
RP11-365O16	HMBOX1	0.700448941
RP11-365O16	YAF2	0.600538779
RP11-365O16	ZNF26	0.672748647
RP11-365O16	ZNF410	0.758067908
RP11-365O16	ZNF519	0.724707347
RP11-365O16	ZNF564	0.67180403
RP11-365O16	ZNF91	0.663158295
RP11-365O16	ZNF573	0.640193607
RP11-365O16	ZNF546	0.613058115
RP11-100E13	MDM4	0.639799289
RP11-100E13	ZNF124	0.668905709
RP11-100E13	ZBTB20	0.735935413
RP11-100E13	MATR3	0.825399913
RP11-100E13	SHPRH	0.606400972
RP11-100E13	DMTF1	0.607577498
RP11-100E13	ZNF410	0.639548361
RP11-100E13	ZNF519	0.682814131
RP11-100E13	ZNF546	0.617527881
RP11-3L21	ZNF124	0.605614543
RP11-3L21	HOXD3	0.605008721
RP11-3L21	ZBTB20	0.749521123
RP11-3L21	MATR3	0.695374543
RP11-3L21	HMBOX1	0.60730224
RP11-3L21	RUNX1T1	0.602628213
RP11-3L21	ZNF410	0.627869734
RP11-3L21	ZNF519	0.63602573
RP5-1087E8	ZBTB37	0.604837612
RP5-1087E8	MDM4	0.72668145
RP5-1087E8	ZNF124	0.632915377
RP5-1087E8	ZBTB20	0.851910585
RP5-1087E8	MATR3	0.653223398
RP5-1087E8	SHPRH	0.684986877
RP5-1087E8	HMBOX1	0.620531156
RP5-1087E8	ZNF410	0.637289333
RP5-1087E8	ZNF519	0.702735232
RP5-1087E8	ZNF564	0.678437291
RP5-1087E8	ZNF493	0.603030985
RP5-1087E8	ZNF91	0.611557986
RP5-1087E8	ZNF573	0.643741891
RP11-1B20	RBM15	0.664668294
RP11-1B20	ZNF124	0.655187509
RP11-1B20	ZBTB20	0.780757676
RP11-1B20	ZNF519	0.658160047
RP11-1B20	ZNF571	0.613548021
RP11-1B20	ZNF573	0.665130706
RP11-1B20	ZNF235	0.656702284
RP5-881P19	RBM15	0.634798051
RP5-881P19	ZNF124	0.646495667
RP5-881P19	ZBTB20	0.785139243
RP5-881P19	HMBOX1	0.662002281
RP5-881P19	ZNF410	0.659133344
RP5-881P19	ZNF519	0.609672893
RP5-881P19	ZNF571	0.708695525
RP5-881P19	ZNF573	0.758125845
RP5-881P19	ZNF235	0.689172672
RP11-520H14	MDM4	0.628894652
RP5-1139B12	RBM15	0.645889084
RP5-1139B12	MDM4	0.616397203
RP5-1139B12	ZNF124	0.661136728
RP5-1139B12	ZBTB20	0.758336148
RP5-1139B12	MATR3	0.629352356
RP5-1139B12	SHPRH	0.669553221
RP5-1139B12	HMBOX1	0.62709866
RP5-1139B12	ZNF26	0.65443874
RP5-1139B12	ZNF410	0.681443494
RP5-1139B12	NFAT5	0.633043157
RP5-1139B12	ZNF519	0.679475621
RP5-1139B12	ZNF571	0.614354884
RP5-1139B12	ZNF573	0.720718931
RP5-1139B12	ZNF235	0.625989011
RP4-803J11	ZBTB20	0.696074815
RP4-803J11	HMBOX1	0.605091326
LINC00582	POU2AF1	0.668776074
RP4-799P18	ZBTB20	0.674547363
RP11-385F5	ZBTB37	0.659728306
RP11-385F5	MDM4	0.738017565
RP11-385F5	ZBTB20	0.733516913
RP11-385F5	MATR3	0.6042102
RP11-385F5	SHPRH	0.605246841
RP11-385F5	DMTF1	0.607510494
RP11-385F5	HMBOX1	0.666325966
RP11-385F5	ZNF410	0.650037245
RP11-385F5	ZNF91	0.600443759
RP11-567G24	HOXD3	0.674373531
RP11-567G24	RUNX1T1	0.659255314
RP11-567G24	HMGA2	0.781379931
RP11-567G24	MEIS2	0.620784545
RP11-177F11	HMGA2	0.660318846
RP11-467I20	HOXD3	0.725435542
RP11-467I20	FOXP2	0.61022863
RP11-467I20	RUNX1T1	0.709605638
RP11-467I20	VAX1	0.603123886
RP11-467I20	HMGA2	0.824353277
RP11-467I20	MEIS2	0.648314191
RP11-269F20	ZBTB37	0.652415024
RP11-269F20	MDM4	0.625993087
RP11-269F20	ZNF124	0.664591779
RP11-269F20	ZBTB20	0.716367335
RP11-269F20	MATR3	0.885527752
RP11-269F20	ZNF26	0.604518324
RP11-269F20	ZNF410	0.636814905
RP11-269F20	RORA	0.615637214
RP11-269F20	ZNF519	0.706130053
RP11-269F20	ZNF573	0.638413415
RP11-269F20	ZNF546	0.64743163
RP11-370K11	ZBTB37	0.61384356
RP11-370K11	MDM4	0.606430509
RP11-370K11	ZNF124	0.691594887
RP11-370K11	REL	0.60100235
RP11-370K11	ZBTB20	0.760713493
RP11-370K11	MATR3	0.794847566
RP11-370K11	ZNF410	0.621523878
RP11-370K11	ZNF519	0.723037462
RP11-370K11	ZNF382	0.62259843
RP11-370K11	ZNF571	0.603568732
RP11-370K11	ZNF573	0.669792884
RP11-370K11	ZNF235	0.62001792
RP11-518L10	MDM4	0.610829293
RP11-518L10	ZBTB20	0.740331945
RP11-518L10	MATR3	0.639749161
RP11-518L10	HMBOX1	0.643285874
RP11-518L10	ZNF410	0.657165848
RP11-173A6	ZBTB20	0.672737564
RP11-62I21	RBM15	0.674616918
RP11-62I21	ZNF124	0.712593236
RP11-62I21	HOXD3	0.632237416
RP11-62I21	ZBTB20	0.692366189
RP11-62I21	MATR3	0.669672863
RP11-62I21	ZNF519	0.667435509
RP11-62I21	ZNF573	0.644550342
RP11-62I21	ZNF235	0.633525491
RP11-522M21	RBM15	0.672148003
RP11-522M21	ZNF124	0.684496032
RP11-522M21	HOXD3	0.661008695
RP11-522M21	ZBTB20	0.745674369
RP11-522M21	MATR3	0.721224823
RP11-522M21	SHPRH	0.617267164
RP11-522M21	HMBOX1	0.610732279
RP11-522M21	RUNX1T1	0.615726645
RP11-522M21	ZNF410	0.655484183
RP11-522M21	ZNF519	0.672852556
RP11-522M21	ZNF573	0.619958723
RP11-522M21	ZNF235	0.612357705
RP11-83A16	RBM15	0.63483694
RP11-83A16	ZBTB37	0.683434016
RP11-83A16	MDM4	0.717505298
RP11-83A16	ZNF124	0.684668121
RP11-83A16	ZBTB20	0.893043569
RP11-83A16	ZNF141	0.602576995
RP11-83A16	MATR3	0.870233117
RP11-83A16	SHPRH	0.657434299
RP11-83A16	HMBOX1	0.64991696
RP11-83A16	ZNF26	0.647964274
RP11-83A16	ZNF410	0.739637485
RP11-83A16	ZNF519	0.753013041
RP11-83A16	ZNF91	0.630400711
RP11-83A16	ZNF573	0.623271129
RP11-83A16	ZNF546	0.642389546
RP11-83A16	ZNF235	0.602954269
RP11-36N20	ZBTB37	0.662321006
RP11-36N20	MDM4	0.712717331
RP11-36N20	ZBTB20	0.868887272
RP11-36N20	ZNF141	0.601114626
RP11-36N20	MATR3	0.708506018
RP11-36N20	SHPRH	0.659514523
RP11-36N20	HMBOX1	0.683479641
RP11-36N20	ZNF410	0.712246601
RP11-36N20	ZNF519	0.672038379
RP11-36N20	ZNF564	0.602444767
RP11-36N20	ZNF91	0.637225621
RP11-1086F11	ZBTB37	0.626296649
RP11-1086F11	MDM4	0.623131029
RP11-1086F11	BAZ2B	0.609950648
RP11-1086F11	ZBTB20	0.815184177
RP11-1086F11	SHPRH	0.675626515
[truncated: 20,341 more rows]
