# Supplementary material for: Identification of Potential Prognostic Biomarkers for Breast Cancer Based on lncRNA-TF-Associated ceRNA Network and Functional Module
Source: Biomed Res Int. 2020 Jul 28;2020:5257896. doi: 10.1155/2020/5257896 (PMC7411464; doi:10.1155/2020/5257896)
Supplement: Supplementary 6 — Supplementary Table S6: raw data for network interactions in Figure 2(a). [file 5257896.f6.csv]

LNCRNA	TF
RP11-206L10	MDM4
RP11-206L10	ZBTB20
RP11-206L10	MATR3
RP11-206L10	ZNF451
RP11-206L10	DMTF1
RP11-206L10	HMBOX1
RP11-206L10	ZNF26
RP11-206L10	ZNF410
RP11-206L10	NFAT5
RP11-206L10	PIAS2
RP11-206L10	ZNF236
RP11-206L10	ZNF564
RP11-206L10	ZNF493
RP11-206L10	ZNF382
RP11-174G17	ZNF410
RP1-184J9	RUNX1T1
RP1-184J9	HMGA2
RP11-415J8	ZNF124
RP11-415J8	MATR3
RP11-415J8	ZNF26
RP11-415J8	NFAT5
RP11-415J8	ZNF573
RP4-665N4	SHPRH
RP4-665N4	HMBOX1
RP4-665N4	ZNF519
RP4-802A10	MDM4
RP4-802A10	DMTF1
RP4-802A10	RUNX1T1
RP4-802A10	YAF2
RP4-802A10	ZNF26
RP5-837I24	RUNX1T1
RP5-837I24	MEIS2
RP4-717I23	MDM4
RP4-717I23	ZBTB20
RP4-717I23	MATR3
RP4-714D9	MATR3
RP4-714D9	ZNF26
RP4-714D9	RORA
RP4-714D9	ZNF493
RP11-421L21	ZNF124
RP11-421L21	MATR3
RP11-284N8	EOMES
RP11-284N8	HCLS1
RP11-284N8	IRF4
RP11-284N8	PRDM1
RP11-284N8	TFEC
RP11-284N8	POU2AF1
RP11-284N8	POU2F2
RP11-552M11	SHPRH
RUSC1-AS1	GABPB2
RP11-267N12	RBM15
RP11-267N12	ZBTB37
RP11-267N12	MDM4
RP11-267N12	HMBOX1
RP11-267N12	ZNF410
RP11-46A10	HMBOX1
RP11-46A10	ZNF26
RP11-46A10	ZNF236
RP11-378J18	SHPRH
RP11-518L10	MDM4
RP11-342K6	RBM15
RP11-342K6	MDM4
RP11-342K6	MATR3
RP11-342K6	ZNF451
RP11-342K6	DMTF1
RP11-342K6	HMBOX1
RP11-342K6	RUNX1T1
RP11-342K6	ZNF248
RP11-342K6	YAF2
RP11-342K6	ZNF26
RP11-342K6	NFAT5
RP11-342K6	ZNF236
RP11-342K6	ZNF564
RP11-181E10	RBM15
RP11-181E10	HMBOX1
RP11-181E10	ZNF573
RP11-181E10	ZNF546
AC016683	SHPRH
AC093375	MATR3
AC009299	ZNF124
AC009299	MATR3
AC009299	RORA
AC009299	NFAT5
AC009299	ZNF573
RP11-65L3	MDM4
RP11-65L3	BAZ2B
RP11-65L3	MATR3
RP11-65L3	ZNF483
AC007038	MDM4
AC007038	ELK4
AC007038	REL
AC007038	ZBTB20
AC007038	MATR3
AC007038	ZNF451
AC007038	HMBOX1
AC007038	ERCC6
AC007038	PIAS2
AC007038	ZNF236
RP11-566E18	APC
RP11-566E18	ZNF510
MAGI1-IT1	ZBTB37
MAGI1-IT1	MDM4
MAGI1-IT1	ZNF410
MAGI1-IT1	RORA
AC092535	HMGA2
AC078852	ZNF410
RP11-148B6	MDM4
RP11-148B6	BAZ2B
RP11-148B6	MATR3
RP11-148B6	SHPRH
RP11-148B6	DMTF1
RP11-148B6	ZNF26
RP11-148B6	RORA
RP11-148B6	NFAT5
RP11-425I13	ZBTB20
CTD-2083E4	SHPRH
CTD-2083E4	YAF2
CTD-2083E4	ZNF410
CTD-2083E4	ZNF91
CTD-2353F22	FOXP2
RP11-141O11	HOXD11
RP11-549J18	MDM4
RP11-549J18	ZBTB20
RP11-549J18	PURA
RP11-549J18	DMTF1
RP11-549J18	HMBOX1
RP11-549J18	ZNF410
RP11-549J18	RORA
RP11-549J18	ZNF91
RP11-43D2	MDM4
RP11-43D2	ZBTB20
RP11-43D2	HMBOX1
RP11-43D2	ZNF410
RP11-43D2	ZNF91
AC034220	ANKRA2
CTB-89H12	ZBTB37
CTB-89H12	MDM4
CTB-89H12	BAZ2B
CTB-89H12	ZBTB20
CTB-89H12	MATR3
CTB-89H12	PURA
CTB-89H12	SHPRH
CTB-89H12	DMTF1
CTB-89H12	HMBOX1
CTB-89H12	ZNF26
CTB-89H12	ZNF410
CTB-89H12	RORA
CTB-89H12	ZNF91
CTB-89H12	ZNF546
CTB-89H12	ZNF586
CTB-89H12	BRWD1
RP11-175K6	EPAS1
RP11-175K6	PPARG
RP11-175K6	HABP4
RP11-175K6	TEAD1
RP11-175K6	EZH1
RP11-175K6	ERG
CTC-308K20	ZNF26
RP11-405O10	RREB1
HCG11	KLF11
RP11-457M11	ZNF410
HCG18	RBM15
HCG18	ZBTB37
HCG18	MDM4
HCG18	BAZ2B
HCG18	NR2C2
HCG18	ZBTB20
HCG18	MATR3
HCG18	ZNF451
HCG18	SHPRH
HCG18	DMTF1
HCG18	HMBOX1
HCG18	ZNF248
HCG18	ZNF410
HCG18	NFAT5
HCG18	ZNF236
HCP5	STAT1
RP11-79N23	ZNF451
RP11-79N23	ZNF26
RP1-102H19	MDM4
RP1-102H19	PURA
RP1-102H19	RORA
RP1-102H19	ZNF91
RP1-102H19	ZNF571
RP1-20N2	MDM4
RP1-20N2	BAZ2B
RP1-20N2	ZNF141
RP1-20N2	RORA
RP1-20N2	ZNF236
RP1-20N2	ZNF493
RP1-20N2	ZNF91
HOTAIRM1	HOXA3
HOTAIRM1	HOXA5
HOXA-AS2	HOXA3
AC007036	SHPRH
AC007036	HMBOX1
AC007036	ZNF519
AC005154	MDM4
AC005154	BAZ2B
AC005154	ZBTB20
AC005154	SHPRH
AC005154	DMTF1
AC005154	HMBOX1
AC005154	ZNF26
AC005154	ZNF410
AC005154	CHD2
AC005154	ZNF236
GS1-124K5	ZBTB20
GS1-124K5	ZNF410
GS1-124K5	ZNF519
AC000120	MDM4
AC000120	ZNF124
AC000120	BAZ2B
AC000120	MATR3
AC000120	ZNF451
AC000120	SHPRH
AC000120	ZNF117
AC000120	DMTF1
AC000120	HMBOX1
AC000120	ZNF26
AC000120	NFAT5
AC000120	ZNF519
AC000120	ZNF493
AC000120	ZNF91
AC007566	ZBTB20
AC007566	DMTF1
AC058791	HOXD3
RP11-115C21	MDM4
RP11-115C21	ZBTB20
RP11-115C21	MATR3
RP11-115C21	PURA
RP11-115C21	ZNF26
RP11-115C21	RORA
AF131215	ZBTB20
AF131215	HMBOX1
AF131215	ZNF410
RP11-102F4	RUNX1T1
RP11-102F4	HMGA2
RP11-102F4	MEIS2
RP11-37B2	MDM4
RP11-37B2	MATR3
RP11-37B2	ZNF451
RP11-37B2	ERCC6
RP11-37B2	NFAT5
RP11-37B2	PIAS2
GS1-251I9	MATR3
KB-431C1	RBM15
KB-431C1	MDM4
KB-431C1	MATR3
KB-431C1	ZNF493
KB-431C1	ZNF546
RP11-383J24	ZBTB20
RP11-382A18	ZNF382
RP11-509J21	ELK4
RP11-331F9	SHPRH
RP11-331F9	ZNF26
RP11-397D12	ZNF410
RP11-197P3	ZNF566
RP11-276H19	NR3C2
RP11-276H19	HOXA4
RP11-276H19	ARID5B
RP11-492E3	MDM4
RP11-492E3	ZNF410
SNHG7	REXO4
RP11-229P13	ZNF519
RP3-323N1	ZBTB20
RP3-323N1	ZNF382
RP11-119F19	NFAT5
RP11-119K6	MDM4
RP11-119K6	MATR3
RP11-119K6	ZNF519
RP11-57H14	SHPRH
RP11-57H14	ZNF564
EMX2OS	KLF4
EMX2OS	EBF3
KCNQ1OT1	ZBTB37
KCNQ1OT1	MDM4
KCNQ1OT1	BAZ2B
KCNQ1OT1	ZBTB20
KCNQ1OT1	MATR3
KCNQ1OT1	SHPRH
KCNQ1OT1	HMBOX1
KCNQ1OT1	ZNF483
KCNQ1OT1	ZNF410
KCNQ1OT1	RORA
KCNQ1OT1	ZNF519
KCNQ1OT1	ZNF564
KCNQ1OT1	ZNF91
CTD-2516F10	ZBTB20
CTD-2516F10	HMBOX1
RP11-5L12	MDM4
RP11-5L12	BAZ2B
RP11-5L12	MATR3
RP11-5L12	ZNF483
RP11-5L12	ZNF236
AP000662	MDM4
AP000662	ZBTB20
RP11-21A7A	MATR3
RP11-21A7A	ZNF26
RP11-21A7A	ZNF410
RP11-21A7A	ZNF519
RP11-21A7A	ZNF586
NEAT1	MDM4
NEAT1	ZBTB20
NEAT1	MATR3
NEAT1	ZNF26
NEAT1	ZNF410
NEAT1	ZNF573
MALAT1	ZBTB37
MALAT1	MDM4
MALAT1	BAZ2B
MALAT1	ZBTB20
MALAT1	ZNF141
MALAT1	MATR3
MALAT1	SHPRH
MALAT1	HMBOX1
MALAT1	ZNF483
MALAT1	ZNF26
MALAT1	ZNF410
MALAT1	ZNF236
MALAT1	ZNF564
MALAT1	ZNF91
MALAT1	ZNF573
MALAT1	ZNF586
RP11-658F2	HMBOX1
SCARNA9	MDM4
SCARNA9	ZNF124
SCARNA9	BAZ2B
SCARNA9	MATR3
SCARNA9	NFAT5
RP11-819C21	MATR3
RP11-819C21	PURA
RP11-819C21	ZDHHC21
RP11-819C21	NFAT5
RP11-730K11	MDM4
RP11-730K11	ZNF410
RP11-174G6	SHPRH
RP11-282K24	MDM4
RP11-282K24	ZBTB20
RP11-282K24	DMTF1
RP11-282K24	RUNX1T1
RP11-282K24	ZNF410
RP11-282K24	PIAS2
RP11-282K24	ZNF91
RP11-923I11	ZBTB20
RP11-923I11	RUNX1T1
RP11-923I11	HMGA2
HOTAIR	HOXC11
RP11-478C19	ZBTB37
RP11-478C19	MDM4
RP11-478C19	MATR3
RP11-290D2	MDM4
RP11-290D2	ZBTB20
RP11-290D2	ZNF141
RP11-290D2	MATR3
RP11-290D2	HMBOX1
RP11-290D2	RORA
RP11-290D2	PIAS2
DLEU2	MDM4
DLEU2	ZNF124
DLEU2	YAF2
DLEU2	ZNF91
RP11-29G8	ZNF410
RP11-29G8	ZNF573
MIR17HG	ZNF566
RP11-902B17	ZBTB20
RP11-902B17	MATR3
RP11-902B17	HMBOX1
RP11-902B17	RORA
RP11-902B17	NFAT5
AC005519	SHPRH
RP11-33N16	MDM4
RP11-33N16	MATR3
RP11-33N16	HMBOX1
MEG3	HMGA2
MEG8	FOXP2
MEG8	RUNX1T1
MEG8	HMGA2
MEG8	MEIS2
RP11-73M18	ZBTB37
RP11-73M18	BAZ2B
RP11-73M18	NR2C2
RP11-73M18	ZBTB20
RP11-73M18	MATR3
RP11-73M18	HMBOX1
RP11-73M18	ZNF410
RP11-73M18	RORA
RP11-73M18	CHD2
RP11-73M18	NFAT5
RP11-73M18	ZNF573
RP11-701H24	SHPRH
RP11-701H24	ZNF236
RP11-64K12	ZBTB20
RP11-64K12	SHPRH
RP11-64K12	HMBOX1
RP11-64K12	ZNF410
RP11-64K12	ZNF236
RP11-540O11	MDM4
RP11-540O11	ZNF124
RP11-540O11	BAZ2B
RP11-540O11	ZBTB20
RP11-540O11	ZNF141
RP11-540O11	DMTF1
RP11-540O11	HMBOX1
RP11-540O11	YAF2
RP11-540O11	ZNF410
RP11-540O11	RORA
RP11-540O11	PIAS2
RP11-540O11	ZNF493
RP11-540O11	ZNF91
RP11-151N17	ZBTB37
RP11-151N17	MDM4
RP11-151N17	ZNF124
RP11-151N17	BAZ2B
RP11-151N17	ZNF141
RP11-151N17	YAF2
RP11-151N17	RORA
RP11-151N17	ZNF236
RP11-151N17	ZNF493
RP11-151N17	ZNF91
RP11-154J22	MDM4
RP11-429D19	RBM15
RP11-429D19	HMBOX1
RP11-429D19	ZNF410
RP11-1006G14	MATR3
RP11-1006G14	ZNF410
RP11-1006G14	ZNF236
RP11-1006G14	ZNF586
RP11-10O17	MDM4
RP11-10O17	MATR3
RP11-10O17	SHPRH
RP11-10O17	ZNF236
RP11-10O17	ZNF91
RP11-797A18	YAF2
RP11-752G15	ZNF26
RP11-752G15	ZNF410
RP11-752G15	ZNF91
CTD-2270L9	MDM4
CTD-2270L9	BAZ2B
CTD-2270L9	MATR3
CTD-2270L9	DMTF1
CTD-2270L9	HMBOX1
CTD-2270L9	ZNF410
CTD-2270L9	RORA
CTD-2270L9	ZNF236
CTD-2270L9	ZNF91
CTD-2270L9	ZNF586
CTD-2574D22	MDM4
CTD-2574D22	ZBTB20
CTD-2574D22	DMTF1
CTD-2574D22	ZNF410
CTD-2574D22	ZNF91
RP11-452L6	ZNF747
RP5-991G20	MDM4
RP5-991G20	MATR3
RP5-991G20	SHPRH
RP11-264L1	ZNF410
RP11-18F14	BAZ2B
RP11-18F14	MATR3
RP11-18F14	SHPRH
RP11-18F14	HMBOX1
RP11-18F14	ZNF483
RP11-18F14	ZNF91
FENDRR	FOXF1
RP11-676J12	ZNF124
RP11-676J12	DMTF1
RP11-676J12	ZNF571
RP1-59D14	HMBOX1
RP1-59D14	ZNF483
RP1-59D14	YAF2
RP1-59D14	ZNF26
RP1-59D14	PIAS2
RP1-59D14	ZNF564
CTC-524C5	DMTF1
CTC-524C5	ZNF26
AC113189	EDF1
AC113189	ZNF524
RP11-227G15	MDM4
RP11-227G15	SHPRH
RP11-227G15	HMBOX1
RP5-837J1	SHPRH
RP5-837J1	HMBOX1
RP5-837J1	ZNF519
RP11-445F12	AATF
AC003104	MDM4
AC003104	ZBTB20
AC003104	MATR3
AC003104	HMBOX1
AC003104	ZNF410
AC003104	RORA
AC003104	PIAS2
AC003104	ZNF564
AC003104	ZNF91
AC003104	ZNF573
AC003104	BRWD1
RP1-193H18	EPAS1
RP1-193H18	PPARG
RP1-193H18	EBF3
RP1-193H18	CEBPA
CTD-2047H16	MATR3
RP11-715F3	MATR3
RP11-21J18	ZBTB20
RP11-158H5	ZBTB20
RP11-158H5	ZNF410
RP11-158H5	NFAT5
RP11-35G9	MDM4
RP11-35G9	ZNF26
RP11-126O1	MDM4
RP11-231E4	MDM4
RP11-231E4	ZNF124
RP11-231E4	MATR3
RP11-231E4	DMTF1
RP11-231E4	ZNF26
CTD-2622I13	ZBTB20
CTD-2622I13	ZNF410
CTD-3252C9	MATR3
CTD-2561J22	ZNF124
CTD-2561J22	SHPRH
CTD-2561J22	ZNF410
CTD-2561J22	ZNF91
CTB-92J24	ZNF254
CTD-2017D11	REL
CTD-2017D11	BAZ2B
CTD-2017D11	ZNF451
CTD-2017D11	NFAT5
CTC-459F4	ZBTB20
CTC-459F4	MATR3
CTC-459F4	SHPRH
CTC-459F4	ZNF410
CTD-3064H18	MDM4
CTD-3064H18	HMBOX1
CTD-3064H18	ZNF571
CTD-3064H18	ZNF573
CTB-102L5	ZNF410
AC084219	ZBTB37
AC084219	MDM4
AC084219	ZNF124
AC084219	BAZ2B
AC084219	ZBTB20
AC084219	MATR3
AC084219	DMTF1
AC084219	HMBOX1
AC084219	ATM
AC084219	ZNF26
AC084219	ZNF410
AC084219	RORA
AC084219	NFAT5
AC084219	PIAS2
AC084219	ZNF564
AC084219	ZNF91
AC084219	ZNF571
AC084219	ZNF283
AC084219	ZNF586
AC084219	ZNF81
CTD-3138B18	MDM4
CTD-3138B18	HMBOX1
CTD-3138B18	ZNF410
CTD-3138B18	ZNF571
A1BG-AS1	ZNF324
RP11-227D2	HMGA2
RP5-1085F17	MDM4
RP5-1085F17	BAZ2B
RP5-1085F17	MATR3
RP5-1085F17	ZNF451
RP5-1085F17	SHPRH
RP5-1085F17	HMBOX1
RP5-1085F17	ZNF483
RP5-1085F17	RORA
RP5-1085F17	BRWD1
RP4-614O4	ZBTB20
RP4-614O4	NFAT5
RP4-564F22	ZNF26
AP001172	DMTF1
MIR155HG	GFI1
MIR155HG	EOMES
AP000265	RBM15
AP001469	ZBTB20
AP001469	ZNF571
AP000525	HOXD3
AP000525	HMGA2
XXbac-B461K10	ZBTB20
KB-318B8	MATR3
KB-318B8	HMBOX1
KB-318B8	NFAT5
KB-318B8	ZNF519
KB-318B8	ZNF417
RP1-5O6	MDM4
RP1-5O6	ZNF124
RP1-5O6	BAZ2B
RP1-5O6	MATR3
RP1-5O6	HMBOX1
RP1-5O6	ZNF410
RNU12	ZNF124
CTA-217C2	MATR3
CTA-217C2	ZNF235
RP11-258C19	MDM4
RP11-258C19	BDP1
RP11-258C19	MATR3
RP11-258C19	PURA
RP11-258C19	DMTF1
RP11-258C19	HMBOX1
RP11-258C19	ATM
RP11-258C19	ZNF26
RP11-258C19	NFAT5
XIST	BAZ2B
XIST	HOXD3
XIST	NR2C2
XIST	ZNF445
XIST	ZBTB20
XIST	ZNF141
XIST	SHPRH
XIST	DMTF1
XIST	RUNX1T1
XIST	ZNF410
XIST	NFAT5
XIST	ZNF236
XIST	ZNF81
RP3-368A4	MDM4
RP3-368A4	ZNF124
RP3-368A4	BAZ2B
RP3-368A4	MATR3
RP3-368A4	PURA
RP3-368A4	ZNF451
RP3-368A4	DMTF1
RP3-368A4	HMBOX1
RP3-368A4	ZDHHC21
RP3-368A4	ATM
RP3-368A4	ZNF410
RP3-368A4	RORA
RP3-368A4	NFAT5
RP3-368A4	ZNF493
RP3-368A4	BRWD1
RP11-761E20	ZBTB20
RP11-761E20	MATR3
RP11-761E20	SHPRH
RP11-761E20	HMBOX1
RP11-761E20	ZNF483
RP11-761E20	ZNF410
EDF1	PPARG
PRDM1	IRF4
ATM	MDM4
AATF	ATM
GFI1	RUNX1T1
POU2AF1	POU2F2
