# Supplementary material for: Identification of Potential Prognostic Biomarkers for Breast Cancer Based on lncRNA-TF-Associated ceRNA Network and Functional Module
Source: Biomed Res Int. 2020 Jul 28;2020:5257896. doi: 10.1155/2020/5257896 (PMC7411464; doi:10.1155/2020/5257896)
Supplement: Supplementary 7 — Supplementary Table S7: raw data for clinical information of TCGA breast cancer. [file 5257896.f7.txt]

sampleID	AJCC_Stage_nature2012	Age_at_Initial_Pathologic_Diagnosis_nature2012	CN_Clusters_nature2012	Converted_Stage_nature2012	Days_to_Date_of_Last_Contact_nature2012	Days_to_date_of_Death_nature2012	ER_Status_nature2012	Gender_nature2012	HER2_Final_Status_nature2012	Integrated_Clusters_no_exp__nature2012	Integrated_Clusters_unsup_exp__nature2012	Integrated_Clusters_with_PAM50__nature2012	Metastasis_Coded_nature2012	Metastasis_nature2012	Node_Coded_nature2012	Node_nature2012	OS_Time_nature2012	OS_event_nature2012	PAM50Call_RNAseq	PAM50_mRNA_nature2012	PR_Status_nature2012	RPPA_Clusters_nature2012	SigClust_Intrinsic_mRNA_nature2012	SigClust_Unsupervised_mRNA_nature2012	Survival_Data_Form_nature2012	Tumor_T1_Coded_nature2012	Tumor_nature2012	Vital_Status_nature2012	_INTEGRATION	_PANCAN_CNA_PANCAN_K8	_PANCAN_Cluster_Cluster_PANCAN	_PANCAN_DNAMethyl_BRCA	_PANCAN_DNAMethyl_PANCAN	_PANCAN_RPPA_PANCAN_K8	_PANCAN_UNC_RNAseq_PANCAN_K16	_PANCAN_miRNA_PANCAN	_PANCAN_mirna_BRCA	_PANCAN_mutation_PANCAN	_PATIENT	_cohort	_primary_disease	_primary_site	additional_pharmaceutical_therapy	additional_radiation_therapy	additional_surgery_locoregional_procedure	additional_surgery_metastatic_procedure	age_at_initial_pathologic_diagnosis	anatomic_neoplasm_subdivision	axillary_lymph_node_stage_method_type
TCGA-3C-AAAU-01																													TCGA-3C-AAAU-01										TCGA-3C-AAAU	TCGA Breast Cancer (BRCA)	breast invasive carcinoma	Breast					55	Left Lower Outer Quadrant	Sentinel lymph node biopsy plus axillary dissection
TCGA-3C-AALI-01																													TCGA-3C-AALI-01										TCGA-3C-AALI	TCGA Breast Cancer (BRCA)	breast invasive carcinoma	Breast					50	Right Upper Outer Quadrant	Sentinel lymph node biopsy plus axillary dissection
TCGA-3C-AALJ-01																													TCGA-3C-AALJ-01										TCGA-3C-AALJ	TCGA Breast Cancer (BRCA)	breast invasive carcinoma	Breast					62	Right
TCGA-3C-AALK-01																													TCGA-3C-AALK-01										TCGA-3C-AALK	TCGA Breast Cancer (BRCA)	breast invasive carcinoma	Breast					52	Right	Sentinel node biopsy alone
TCGA-4H-AAAK-01																													TCGA-4H-AAAK-01										TCGA-4H-AAAK	TCGA Breast Cancer (BRCA)	breast invasive carcinoma	Breast					50	Left|Left Upper Outer Quadrant	Axillary lymph node dissection alone
TCGA-5L-AAT0-01																													TCGA-5L-AAT0-01										TCGA-5L-AAT0	TCGA Breast Cancer (BRCA)	breast invasive carcinoma	Breast					42	Right|Right Lower Outer Quadrant	Axillary lymph node dissection alone
TCGA-5L-AAT1-01																													TCGA-5L-AAT1-01										TCGA-5L-AAT1	TCGA Breast Cancer (BRCA)	breast invasive carcinoma	Breast					63	Left	Other (specify)
TCGA-5T-A9QA-01																													TCGA-5T-A9QA-01										TCGA-5T-A9QA	TCGA Breast Cancer (BRCA)	breast invasive carcinoma	Breast					52	Left	No axillary staging
TCGA-A1-A0SB-01	Stage I	70	1	Stage I	259		Positive	FEMALE	Negative				Negative	M0	Negative	N0	259	0	Normal		Negative				enrollment	T1	T1	LIVING	TCGA-A1-A0SB-01	Kirc+	C4-BRCA/Basal	cluster 5	Low purity c2		BRCA basal-like c8	miRNA cluster 7	cluster 3	mutation c1uster 9	TCGA-A1-A0SB	TCGA Breast Cancer (BRCA)	breast invasive carcinoma	Breast					70	Left	Sentinel node biopsy alone
TCGA-A1-A0SD-01	Stage IIA	59	2	Stage IIA	437		Positive	FEMALE	Negative				Negative	M0	Negative	N0	437	0	LumA	Luminal A	Positive		-9	-3	enrollment	T_Other	T2	LIVING	TCGA-A1-A0SD-01	High	C3-BRCA/Luminal	cluster 1	BRCA non-CIMP c9		BRCA nonbasal-like c7	miRNA cluster 4	cluster 6	mutation c1uster 9	TCGA-A1-A0SD	TCGA Breast Cancer (BRCA)	breast invasive carcinoma	Breast					59	Left	Sentinel lymph node biopsy plus axillary dissection
TCGA-A1-A0SE-01	Stage I	56	2	Stage I	1320		Positive	FEMALE	Negative				Negative	M0	Negative	N0	1320	0	LumA	Luminal A	Positive		-5	-7	enrollment	T1	T1	LIVING	TCGA-A1-A0SE-01	Iq	C3-BRCA/Luminal	cluster 1	BRCA non-CIMP c9		BRCA nonbasal-like c7	miRNA cluster 13	cluster 6	mutation c1uster 9	TCGA-A1-A0SE	TCGA Breast Cancer (BRCA)	breast invasive carcinoma	Breast					56	Left Upper Outer Quadrant	Sentinel lymph node biopsy plus axillary dissection
TCGA-A1-A0SF-01	Stage IIA	54	3	Stage IIA	1463		Positive	FEMALE	Negative				Negative	M0	Negative	N0	1463	0	LumA		Positive				enrollment	T_Other	T2	LIVING	TCGA-A1-A0SF-01	BRCA-LUAD+	C3-BRCA/Luminal	cluster 4	BRCA non-CIMP c9	BRCA nonbasal-like c8	BRCA nonbasal-like c7	miRNA cluster 12	cluster 6	mutation c1uster 9	TCGA-A1-A0SF	TCGA Breast Cancer (BRCA)	breast invasive carcinoma	Breast					54	Left	Sentinel lymph node biopsy plus axillary dissection
TCGA-A1-A0SG-01	Stage IIB	61	4	Stage IIB	433		Positive	FEMALE	Negative				Negative	M0	Positive	N1	433	0	LumA		Positive				enrollment	T_Other	T2	LIVING	TCGA-A1-A0SG-01	Kirc+	C3-BRCA/Luminal	cluster 2	BRCA non-CIMP c9		BRCA nonbasal-like c7	miRNA cluster 14	cluster 5	mutation c1uster 9	TCGA-A1-A0SG	TCGA Breast Cancer (BRCA)	breast invasive carcinoma	Breast					61	Right	Sentinel lymph node biopsy plus axillary dissection
TCGA-A1-A0SH-01	Stage IIA	39	5	Stage IIA	1437		Negative	FEMALE	Negative	1	1	1	Negative	M0	Negative	N0	1437	0	LumA	Luminal A	Positive	Her2	-5	-7	enrollment	T_Other	T2	LIVING	TCGA-A1-A0SH-01	High	C3-BRCA/Luminal	cluster 2	BRCA non-CIMP c9	BRCA nonbasal-like c8	BRCA nonbasal-like c7	miRNA c1uster 9	cluster 4	mutation c1uster 10	TCGA-A1-A0SH	TCGA Breast Cancer (BRCA)	breast invasive carcinoma	Breast					39	Left Upper Inner Quadrant	Sentinel node biopsy alone
TCGA-A1-A0SI-01	Stage IIB	52	3	Stage IIB	634		Positive	FEMALE	Negative				Negative	M0	Positive	N1	634	0	LumB		Positive				enrollment	T_Other	T2	LIVING	TCGA-A1-A0SI-01	BRCA-LUAD+	C3-BRCA/Luminal	cluster 5	BRCA non-CIMP c9		BRCA nonbasal-like c7	miRNA cluster 4	cluster 7	mutation cluster 3	TCGA-A1-A0SI	TCGA Breast Cancer (BRCA)	breast invasive carcinoma	Breast					52	Right	Sentinel lymph node biopsy plus axillary dissection
TCGA-A1-A0SJ-01	Stage IIIA	39	3	Stage IIIA	426		Positive	FEMALE	Negative	1	3	3	Negative	M0	Positive	N1	426	0	LumA	Luminal A	Positive	ReacI	-3	-3	enrollment	T_Other	T3	LIVING	TCGA-A1-A0SJ-01	High	C3-BRCA/Luminal	cluster 4	BRCA CIMP c7	BRCA nonbasal-like c8	BRCA nonbasal-like c7	miRNA cluster 4	cluster 4	mutation c1uster 9	TCGA-A1-A0SJ	TCGA Breast Cancer (BRCA)	breast invasive carcinoma	Breast					39	Left	Sentinel lymph node biopsy plus axillary dissection
TCGA-A1-A0SK-01	Stage IIA	54	1	Stage IIA	594	967	Negative	FEMALE	Negative	2	2	2	Negative	M0	Negative	N0	967	1	Basal	Basal-like	Negative	Basal	-13	-6	followup	T_Other	T2	DECEASED	TCGA-A1-A0SK-01	Squamous	C4-BRCA/Basal	cluster 5	BRCA basal-like c8	BRCA basal-like c6	GBM-like c6	miRNA cluster 12	cluster 5	mutation cluster 5	TCGA-A1-A0SK	TCGA Breast Cancer (BRCA)	breast invasive carcinoma	Breast					54	Right Upper Outer Quadrant	Sentinel lymph node biopsy plus axillary dissection
TCGA-A1-A0SM-01	Stage IIA	77	2	Stage IIA	242		Positive	MALE	Positive				Negative	M0	Negative	N0	242	0	LumA	Luminal B	Negative		-1	-3	enrollment	T_Other	T2	LIVING	TCGA-A1-A0SM-01	BRCA-LUAD+	C3-BRCA/Luminal	cluster 4	BRCA CIMP c7		BRCA nonbasal-like c7	miRNA cluster 4	cluster 4	mutation c1uster 9	TCGA-A1-A0SM	TCGA Breast Cancer (BRCA)	breast invasive carcinoma	Breast					77	Left	Sentinel lymph node biopsy plus axillary dissection
TCGA-A1-A0SN-01	Stage IIIA	50	5	Stage IIA	1196		Positive	FEMALE	Positive				Negative	M0	Positive	N1	1196	0	LumB		Positive				enrollment	T1	T1	LIVING	TCGA-A1-A0SN-01	High	C3-BRCA/Luminal	cluster 3	BRCA CIMP c7		BRCA nonbasal-like c7	miRNA cluster 4	cluster 4	mutation c1uster 9	TCGA-A1-A0SN	TCGA Breast Cancer (BRCA)	breast invasive carcinoma	Breast					50	Left	Sentinel lymph node biopsy plus axillary dissection
TCGA-A1-A0SO-01	Stage IIB	67	1	Stage IIB	852		Negative	FEMALE	Negative	2	2	2	Negative	M0	Positive	N1	852	0	Basal	Basal-like	Negative	Basal	-13	0	enrollment	T_Other	T2	LIVING	TCGA-A1-A0SO-01	High	C4-BRCA/Basal	cluster 5	BRCA basal-like c8	BRCA basal-like c6	BRCA basal-like c8	miRNA cluster 12	cluster 5	mutation cluster 5	TCGA-A1-A0SO	TCGA Breast Cancer (BRCA)	breast invasive carcinoma	Breast					67	Right	Sentinel lymph node biopsy plus axillary dissection
TCGA-A1-A0SP-01	Stage IIA	40		Stage IIA	583		Negative	FEMALE	Negative				Negative	M0	Negative	N0	583	0	Basal		Negative				enrollment	T_Other	T2	LIVING	TCGA-A1-A0SP-01	High	C4-BRCA/Basal		BRCA basal-like c8		BRCA basal-like c8	miRNA cluster 12		mutation cluster 5	TCGA-A1-A0SP	TCGA Breast Cancer (BRCA)	breast invasive carcinoma	Breast					40	Right	Axillary lymph node dissection alone
TCGA-A1-A0SQ-01	Stage IIB	45	3	Stage IIB	553		Positive	FEMALE	Negative				Negative	M0	Positive	N1	553	0	LumA		Positive				enrollment	T_Other	T2	LIVING	TCGA-A1-A0SQ-01	Iq	C3-BRCA/Luminal	cluster 2	BRCA CIMP c7	BRCA nonbasal-like c8	BRCA nonbasal-like c7	miRNA cluster 3	cluster 2	mutation c1uster 9	TCGA-A1-A0SQ	TCGA Breast Cancer (BRCA)	breast invasive carcinoma	Breast					45	Left	Sentinel lymph node biopsy plus axillary dissection
TCGA-A2-A04N-01	Stage IA	66	4	Stage I	3188		Positive	FEMALE	Negative	3	3	3	Negative	M0	Negative	N0	3188	0	LumA	Luminal A	Positive	LumA	-5	-3	followup	T1	T1	LIVING	TCGA-A2-A04N-01	Kirc+	C3-BRCA/Luminal	cluster 2	BRCA non-CIMP c9	BRCA nonbasal-like c8	BRCA nonbasal-like c7	miRNA cluster 14	cluster 6	mutation cluster 4	TCGA-A2-A04N	TCGA Breast Cancer (BRCA)	breast invasive carcinoma	Breast					66	Right	Other (specify)
TCGA-A2-A04P-01	Stage IIIC	36	1	No_Conversion	547	547	Negative	FEMALE	Negative	2	2	2	Negative	M0	Positive	N3	547	1	Basal	Basal-like	Negative	Basal	-13	0	followup	T_Other	T2	DECEASED	TCGA-A2-A04P-01	High	C4-BRCA/Basal	cluster 5	BRCA basal-like c8	BRCA basal-like c6	BRCA basal-like c8	miRNA cluster 12	cluster 5	mutation cluster 3	TCGA-A2-A04P	TCGA Breast Cancer (BRCA)	breast invasive carcinoma	Breast	YES	YES	NO	NO	36	Left	Axillary lymph node dissection alone
TCGA-A2-A04Q-01	Stage IA	48	3	Stage I	1275		Negative	FEMALE	Negative	1	2	3	Negative	M0	Negative	N0	1275	0	Basal	Basal-like	Negative	ReacII	-13	-12	followup	T1	T1	LIVING	TCGA-A2-A04Q-01	High	C4-BRCA/Basal	cluster 1	BRCA CIMP c7	KIRC-like c1	BRCA basal-like c8	miRNA cluster 4	cluster 4	mutation c1uster 9	TCGA-A2-A04Q	TCGA Breast Cancer (BRCA)	breast invasive carcinoma	Breast					48	Right Upper Outer Quadrant|Right	Other (specify)
TCGA-A2-A04R-01	Stage IA	36	5	Stage I	2499		Positive	FEMALE	Negative				Negative	M0	Negative	N0	2499	0	LumB	Luminal B	Positive		-10	-3	followup	T1	T1	LIVING	TCGA-A2-A04R-01	BRCA-LUAD+	C3-BRCA/Luminal	cluster 4	BRCA CIMP c7		BRCA nonbasal-like c7	miRNA cluster 4	cluster 4	mutation c1uster 10	TCGA-A2-A04R	TCGA Breast Cancer (BRCA)	breast invasive carcinoma	Breast					36	Left Upper Inner Quadrant	Sentinel node biopsy alone
TCGA-A2-A04T-01	Stage IIA	62	1	Stage IIA	2246		Negative	FEMALE	Negative				Negative	M0	Negative	N0	2246	0	Basal	Basal-like	Negative	Basal	-13	-12	followup	T_Other	T2	LIVING	TCGA-A2-A04T-01	High	C4-BRCA/Basal	cluster 5	BRCA basal-like c8	BRCA basal-like c6	BRCA basal-like c8	miRNA cluster 14	cluster 5		TCGA-A2-A04T	TCGA Breast Cancer (BRCA)	breast invasive carcinoma	Breast					62	Left Upper Inner Quadrant	Sentinel node biopsy alone
TCGA-A2-A04U-01	Stage IIA	47		Stage IIA	670		Negative	FEMALE	Negative				Negative	M0	Negative	N0	670	0	Basal	Basal-like	Negative	Basal	-13	0	followup	T_Other	T2	LIVING	TCGA-A2-A04U-01	High	C4-BRCA/Basal	cluster 5	BRCA basal-like c8	BRCA basal-like c6	BRCA basal-like c8	miRNA cluster 4	cluster 5	mutation cluster 5	TCGA-A2-A04U	TCGA Breast Cancer (BRCA)	breast invasive carcinoma	Breast					47	Right	Sentinel node biopsy alone
TCGA-A2-A04V-01	Stage IIA	39	2	Stage IIA	1920	1920	Positive	FEMALE	Negative	3	3	3	Negative	M0	Negative	N0	1920	1	LumA	Luminal A	Positive	LumA/B	0	-3	enrollment	T_Other	T2	DECEASED	TCGA-A2-A04V-01	Kirc+	C3-BRCA/Luminal	cluster 2	BRCA non-CIMP c9	BRCA nonbasal-like c8	BRCA nonbasal-like c7	miRNA cluster 14	cluster 2	mutation cluster 4	TCGA-A2-A04V	TCGA Breast Cancer (BRCA)	breast invasive carcinoma	Breast	YES	NO	NO	NO	39	Right Lower Outer Quadrant|Right	Sentinel node biopsy alone
TCGA-A2-A04W-01	Stage IIB	50	3	No_Conversion	1948		Negative	FEMALE	Positive				Negative	M0	Positive	N1	1948	0	Her2	HER2-enriched	Negative	Her2	-11	-5	followup	T_Other	T2	LIVING	TCGA-A2-A04W-01	Squamous	C3-BRCA/Luminal	cluster 1	Cluster 5	BRCA basal-like c6	BRCA nonbasal-like c7	miRNA c1uster 9	cluster 4	mutation cluster 3	TCGA-A2-A04W	TCGA Breast Cancer (BRCA)	breast invasive carcinoma	Breast					50	Right Upper Outer Quadrant	Axillary lymph node dissection alone
TCGA-A2-A04X-01	Stage IIA	34	3	Stage IIA	1686		Positive	FEMALE	Positive				Negative	M0	Negative	N0	1686	0	Her2	HER2-enriched	Positive		-2	-5	followup	T_Other	T2	LIVING	TCGA-A2-A04X-01	High	C3-BRCA/Luminal	cluster 1	BRCA CIMP c7		BRCA nonbasal-like c7	miRNA cluster 4	cluster 4	mutation c1uster 9	TCGA-A2-A04X	TCGA Breast Cancer (BRCA)	breast invasive carcinoma	Breast					34	Left	Sentinel node biopsy alone
TCGA-A2-A04Y-01	Stage IIB	53	5	No_Conversion	1099		Positive	FEMALE	Negative	2	3	3	Negative	M0	Positive	N1	1099	0	LumB	Luminal A	Positive	LumA	-2	-3	followup	T_Other	T2	LIVING	TCGA-A2-A04Y-01	BRCA-LUAD+	C3-BRCA/Luminal	cluster 1	BRCA non-CIMP c9	BRCA nonbasal-like c8	BRCA nonbasal-like c7	miRNA cluster 4	cluster 5	mutation c1uster 9	TCGA-A2-A04Y	TCGA Breast Cancer (BRCA)	breast invasive carcinoma	Breast					53	Right Upper Outer Quadrant	Sentinel lymph node biopsy plus axillary dissection
TCGA-A2-A0CK-01																													TCGA-A2-A0CK-01	Iq			BRCA non-CIMP c9	BRCA nonbasal-like c8		miRNA cluster 14			TCGA-A2-A0CK	TCGA Breast Cancer (BRCA)	breast invasive carcinoma	Breast	YES	NO			60	Right	Sentinel lymph node biopsy plus axillary dissection
TCGA-A2-A0CL-01	Stage IIIA	37	3	No_Conversion	1963		Positive	FEMALE	Negative	1	1	1	Negative	M0	Positive	N2	1963	0	Normal	HER2-enriched	Positive	Basal	-2	-5	followup	T_Other	T3	LIVING	TCGA-A2-A0CL-01	High	C3-BRCA/Luminal	cluster 1	Cluster 5	BRCA nonbasal-like c8	BRCA nonbasal-like c7	miRNA cluster 4	cluster 4	mutation c1uster 9	TCGA-A2-A0CL	TCGA Breast Cancer (BRCA)	breast invasive carcinoma	Breast					37	Right Lower Outer Quadrant	Axillary lymph node dissection alone
TCGA-A2-A0CM-01	Stage IIA	40	4	Stage IIA	754	754	Negative	FEMALE	Negative	1	1	2	Negative	M0	Negative	N0	754	1	Basal	Basal-like	Negative	Basal	-13	-12	followup	T_Other	T2	DECEASED	TCGA-A2-A0CM-01	High	C4-BRCA/Basal	cluster 4	BRCA basal-like c8	BRCA basal-like c6	BRCA basal-like c8	miRNA cluster 4	cluster 4	mutation cluster 5	TCGA-A2-A0CM	TCGA Breast Cancer (BRCA)	breast invasive carcinoma	Breast	YES	NO	NO		40	Left	Sentinel node biopsy alone
TCGA-A2-A0CO-01																													TCGA-A2-A0CO-01	Iq			BRCA non-CIMP c9			miRNA cluster 3			TCGA-A2-A0CO	TCGA Breast Cancer (BRCA)	breast invasive carcinoma	Breast					85	Right	Axillary lymph node dissection alone
TCGA-A2-A0CP-01	Stage IA	60	4	Stage I	2813		Positive	FEMALE	Negative	1	4	3	Negative	M0	Negative	N0	2813	0	LumA	Luminal A	Positive	X	-5	-7	followup	T1	T1	LIVING	TCGA-A2-A0CP-01	Kirc+	C3-BRCA/Luminal	cluster 1	BRCA non-CIMP c9	BRCA nonbasal-like c8	BRCA nonbasal-like c7	miRNA cluster 4	cluster 4	mutation cluster 4	TCGA-A2-A0CP	TCGA Breast Cancer (BRCA)	breast invasive carcinoma	Breast					60	Right	Sentinel node biopsy alone
TCGA-A2-A0CQ-01	Stage IA	62	2	Stage I	2694		Positive	FEMALE	Negative	1	3	3	Negative	M0	Negative	N0	2694	0	LumA	Luminal A	Positive	LumA/B	-12	-3	followup	T1	T1	LIVING	TCGA-A2-A0CQ-01	Iq	C3-BRCA/Luminal	cluster 4	BRCA CIMP c7	BRCA nonbasal-like c8	BRCA nonbasal-like c7	miRNA cluster 14	cluster 2	mutation cluster 4	TCGA-A2-A0CQ	TCGA Breast Cancer (BRCA)	breast invasive carcinoma	Breast					62	Right	Sentinel node biopsy alone
TCGA-A2-A0CR-01																													TCGA-A2-A0CR-01	Quiet			BRCA non-CIMP c9	BRCA nonbasal-like c8		miRNA cluster 13			TCGA-A2-A0CR	TCGA Breast Cancer (BRCA)	breast invasive carcinoma	Breast					54	Left Upper Inner Quadrant	Axillary lymph node dissection alone
TCGA-A2-A0CS-01	Stage IV	73	2	No_Conversion	2298		Positive	FEMALE	Negative	3	3	3	Positive	M1	Positive	N3	2298	0	LumA	Luminal A	Positive	LumA	-12	-3	followup	T_Other	T4	LIVING	TCGA-A2-A0CS-01	BRCA-LUAD+	C3-BRCA/Luminal	cluster 2	BRCA non-CIMP c9	BRCA nonbasal-like c8	BRCA nonbasal-like c7	miRNA cluster 4	cluster 4	mutation cluster 4	TCGA-A2-A0CS	TCGA Breast Cancer (BRCA)	breast invasive carcinoma	Breast					73	Left	Axillary lymph node dissection alone
TCGA-A2-A0CT-01	Stage IIA	71	5	Stage IIA	2288		Positive	FEMALE	Negative	4	3	4	Negative	M0	Negative	N0	2288	0	LumA	Luminal B	Negative	LumA/B	-10	-3	followup	T_Other	T2	LIVING	TCGA-A2-A0CT-01	BRCA-LUAD+	C3-BRCA/Luminal	cluster 3	BRCA CIMP c7	BRCA nonbasal-like c8	BRCA nonbasal-like c7	miRNA cluster 14	cluster 2	mutation c1uster 9	TCGA-A2-A0CT	TCGA Breast Cancer (BRCA)	breast invasive carcinoma	Breast					71	Right Upper Outer Quadrant	Sentinel node biopsy alone
TCGA-A2-A0CU-01	Stage IIA	73	5	Stage IIA	139	157	Positive	FEMALE	Negative	3	3	3	Negative	M0	Negative	N0	157	1	LumA	Luminal A	Positive	LumA/B	0	-3	followup	T_Other	T2	DECEASED	TCGA-A2-A0CU-01	Squamous	C3-BRCA/Luminal	cluster 2	BRCA non-CIMP c9	BRCA nonbasal-like c8	BRCA nonbasal-like c7	miRNA cluster 14	cluster 2	mutation c1uster 9	TCGA-A2-A0CU	TCGA Breast Cancer (BRCA)	breast invasive carcinoma	Breast					73	Right Lower Outer Quadrant	Sentinel node biopsy alone
TCGA-A2-A0CV-01	Stage IIB	41	2	No_Conversion	1929		Positive	FEMALE	Negative	3	4	3	Negative	M0	Positive	N1	1929	0	LumA	Luminal A	Positive	LumA/B	-5	-7	followup	T_Other	T2	LIVING	TCGA-A2-A0CV-01	BRCA-LUAD+	C3-BRCA/Luminal	cluster 2	BRCA non-CIMP c9	BRCA nonbasal-like c8	BRCA nonbasal-like c7	miRNA cluster 7	cluster 6	mutation c1uster 9	TCGA-A2-A0CV	TCGA Breast Cancer (BRCA)	breast invasive carcinoma	Breast					41	Left Lower Outer Quadrant	Axillary lymph node dissection alone
TCGA-A2-A0CW-01	Stage IIB	67	1	No_Conversion	1947		Positive	FEMALE	Negative				Negative	M0	Positive	N1	1947	0	LumB	Luminal B	Positive	LumA/B	-2	-5	followup	T_Other	T2	LIVING	TCGA-A2-A0CW-01	Squamous	C3-BRCA/Luminal	cluster 1	BRCA non-CIMP c9	BRCA nonbasal-like c8	BRCA nonbasal-like c7			mutation cluster 3	TCGA-A2-A0CW	TCGA Breast Cancer (BRCA)	breast invasive carcinoma	Breast					67	Right	Sentinel lymph node biopsy plus axillary dissection
TCGA-A2-A0CX-01	Stage IIA	52	3	Stage IIA	1728		Positive	FEMALE	Positive				Negative	M0	Negative	N0	1728	0	Her2	HER2-enriched	Negative	Her2	-11	-5	followup	T_Other	T2	LIVING	TCGA-A2-A0CX-01	High	C3-BRCA/Luminal	cluster 4	BRCA CIMP c7	BRCA basal-like c6	BRCA nonbasal-like c7			mutation cluster 5	TCGA-A2-A0CX	TCGA Breast Cancer (BRCA)	breast invasive carcinoma	Breast					52	Left	Sentinel node biopsy alone
TCGA-A2-A0CY-01	Stage IIB	63	1	No_Conversion	1673		Positive	FEMALE	Negative				Negative	M0	Positive	N1	1673	0		HER2-enriched	Positive	LumA/B	0	-3	followup	T_Other	T2	LIVING	TCGA-A2-A0CY-01	Kirc+		cluster 5	Cluster 5	BRCA nonbasal-like c8		miRNA c1uster 10	cluster 7		TCGA-A2-A0CY	TCGA Breast Cancer (BRCA)	breast invasive carcinoma	Breast					63	Left Lower Outer Quadrant	Sentinel lymph node biopsy plus axillary dissection
TCGA-A2-A0CZ-01	Stage IIA	46	4	Stage IIA	1615		Positive	FEMALE	Negative	3	4	3	Negative	M0	Negative	N0	1615	0	Normal	Luminal A	Positive	ReacII	-5	-7	followup	T_Other	T2	LIVING	TCGA-A2-A0CZ-01	Kirc+	C3-BRCA/Luminal	cluster 1	BRCA non-CIMP c9	KIRC-like c1	BRCA nonbasal-like c7	miRNA cluster 14	cluster 2	mutation c1uster 9	TCGA-A2-A0CZ	TCGA Breast Cancer (BRCA)	breast invasive carcinoma	Breast					46	Right Upper Inner Quadrant	Sentinel node biopsy alone
TCGA-A2-A0D0-01	Stage IIA	60	1	Stage IIA	643		Negative	FEMALE	Negative	2	2	2	Negative	M0	Negative	N0	643	0	Basal	Basal-like	Negative	Basal	-13	-12	followup	T_Other	T2	LIVING	TCGA-A2-A0D0-01	High	C4-BRCA/Basal	cluster 5	BRCA basal-like c8	BRCA basal-like c6	BRCA basal-like c8	miRNA cluster 14	cluster 5	mutation cluster 5	TCGA-A2-A0D0	TCGA Breast Cancer (BRCA)	breast invasive carcinoma	Breast					60	Left Upper Outer Quadrant	Axillary lymph node dissection alone
TCGA-A2-A0D1-01	Stage IIA	76	1	Stage IIA	1051		Negative	FEMALE	Positive	2	2	1	Negative	M0	Negative	N0	1051	0	Her2	HER2-enriched	Negative	Basal	-2	-6	followup	T_Other	T2	LIVING	TCGA-A2-A0D1-01	Squamous	C3-BRCA/Luminal	cluster 3	BRCA CIMP c7	BRCA basal-like c6	BRCA nonbasal-like c7	miRNA cluster 6	cluster 1	mutation cluster 8	TCGA-A2-A0D1	TCGA Breast Cancer (BRCA)	breast invasive carcinoma	Breast					76	Left Lower Inner Quadrant	Sentinel node biopsy alone
TCGA-A2-A0D2-01	Stage IIB	45	3	Stage IIA	1027		Negative	FEMALE	Negative	2	2	2	Negative	M0	Negative	N0	1027	0	Basal	Basal-like	Negative	Basal	-13	-12	followup	T_Other	T2	LIVING	TCGA-A2-A0D2-01	High	C4-BRCA/Basal	cluster 5	Low purity c2	BRCA basal-like c6	BRCA basal-like c8	miRNA cluster 4	cluster 4	mutation cluster 2	TCGA-A2-A0D2	TCGA Breast Cancer (BRCA)	breast invasive carcinoma	Breast					45	Left Lower Outer Quadrant	Sentinel node biopsy alone
TCGA-A2-A0D3-01	Stage IA	42	2	Stage I	875		Positive	FEMALE	Negative	3	3	3	Negative	M0	Negative	N0	875	0	LumA	Luminal A	Positive	LumA	-5	-3	followup	T1	T1	LIVING	TCGA-A2-A0D3-01	BRCA-LUAD+	C3-BRCA/Luminal	cluster 4	BRCA CIMP c7	BRCA nonbasal-like c8	BRCA nonbasal-like c7	miRNA cluster 4	cluster 6	mutation cluster 4	TCGA-A2-A0D3	TCGA Breast Cancer (BRCA)	breast invasive carcinoma	Breast					42	Left Lower Outer Quadrant	Sentinel node biopsy alone
TCGA-A2-A0D4-01	Stage IIB	37	5	No_Conversion	767		Positive	FEMALE	Negative	4	3	4	Negative	M0	Positive	N1	767	0	LumB	Luminal B	Positive	LumA/B	-10	-3	followup	T_Other	T2	LIVING	TCGA-A2-A0D4-01	BRCA-LUAD+	C3-BRCA/Luminal	cluster 3	BRCA CIMP c7	BRCA nonbasal-like c8	BRCA nonbasal-like c7	miRNA cluster 4	cluster 5	mutation c1uster 9	TCGA-A2-A0D4	TCGA Breast Cancer (BRCA)	breast invasive carcinoma	Breast					37	Left	Axillary lymph node dissection alone
TCGA-A2-A0EM-01	Stage IA	73	2	Stage I	3093		Positive	FEMALE	Negative				Negative	M0	Negative	N0	3093	0	LumA	Luminal A	Positive		-12	-3	followup	T1	T1	LIVING	TCGA-A2-A0EM-01	Iq	C3-BRCA/Luminal	cluster 2	BRCA non-CIMP c9		BRCA nonbasal-like c7	miRNA cluster 14	cluster 2	mutation cluster 4	TCGA-A2-A0EM	TCGA Breast Cancer (BRCA)	breast invasive carcinoma	Breast					73	Right Upper Inner Quadrant	Sentinel node biopsy alone
TCGA-A2-A0EN-01	Stage IIA	70	2	Stage IIA	2717		Positive	FEMALE	Negative				Negative	M0	Negative	N0	2717	0	LumA	Luminal A	Positive		-5	-7	followup	T_Other	T2	LIVING	TCGA-A2-A0EN-01	Iq	C3-BRCA/Luminal	cluster 1	BRCA non-CIMP c9		BRCA nonbasal-like c7	miRNA cluster 14	cluster 2	mutation cluster 4	TCGA-A2-A0EN	TCGA Breast Cancer (BRCA)	breast invasive carcinoma	Breast					70	Right	Sentinel node biopsy alone
TCGA-A2-A0EO-01	Stage IA	54	2	Stage I	2441		Positive	FEMALE	Negative	1	4	3	Negative	M0	Negative	N0	2441	0	LumA	Luminal A	Positive	LumA	-5	-7	followup	T1	T1	LIVING	TCGA-A2-A0EO-01	High	C3-BRCA/Luminal	cluster 4	BRCA CIMP c7	BRCA nonbasal-like c8	BRCA nonbasal-like c7	miRNA cluster 14	cluster 2	mutation cluster 4	TCGA-A2-A0EO	TCGA Breast Cancer (BRCA)	breast invasive carcinoma	Breast					54	Left	Sentinel node biopsy alone
TCGA-A2-A0EP-01																													TCGA-A2-A0EP-01					BRCA nonbasal-like c8		miRNA cluster 4			TCGA-A2-A0EP	TCGA Breast Cancer (BRCA)	breast invasive carcinoma	Breast					56	Right Lower Inner Quadrant	Sentinel node biopsy alone
TCGA-A2-A0EQ-01	Stage IIA	64	4	Stage IIA	2426		Negative	FEMALE	Positive	1	1	4	Negative	M0	Negative	N0	2426	0	Her2	HER2-enriched	Negative	Basal	-2	-5	followup	T_Other	T2	LIVING	TCGA-A2-A0EQ-01	High	C3-BRCA/Luminal	cluster 4	BRCA non-CIMP c9	BRCA basal-like c6	BRCA nonbasal-like c7	miRNA cluster 12	cluster 5	mutation cluster 8	TCGA-A2-A0EQ	TCGA Breast Cancer (BRCA)	breast invasive carcinoma	Breast					64	Left	Other (specify)
TCGA-A2-A0ER-01	Stage IB	63	5	No_Conversion	2262		Positive	FEMALE	Negative				Negative	M0	Positive	N1	2262	0	LumA	Luminal B	Positive	ReacII	-10	-3	followup	T1	T1	LIVING	TCGA-A2-A0ER-01	Kirc+	C3-BRCA/Luminal	cluster 2	BRCA non-CIMP c9	KIRC-like c1	BRCA nonbasal-like c7	miRNA cluster 14	cluster 2	mutation c1uster 9	TCGA-A2-A0ER	TCGA Breast Cancer (BRCA)	breast invasive carcinoma	Breast					63	Right Lower Inner Quadrant	Sentinel lymph node biopsy plus axillary dissection
TCGA-A2-A0ES-01	Stage IIA	52	4	Stage IIA	1127		Positive	FEMALE	Negative	3	4	3	Negative	M0	Negative	N0	1127	0	LumA	Luminal A	Positive	ReacII	-5	-7	followup	T_Other	T2	LIVING	TCGA-A2-A0ES-01	Kirc+	C3-BRCA/Luminal	cluster 1	BRCA non-CIMP c9	BRCA nonbasal-like c8	BRCA nonbasal-like c7	miRNA cluster 13	cluster 6	mutation c1uster 9	TCGA-A2-A0ES	TCGA Breast Cancer (BRCA)	breast invasive carcinoma	Breast					52	Left Upper Outer Quadrant	Sentinel node biopsy alone
TCGA-A2-A0ET-01	Stage IIIA	58	3	No_Conversion	1066		Positive	FEMALE	Negative				Negative	M0	Positive	N2	1066	0	LumA	Luminal A	Positive		-10	-3	followup	T_Other	T2	LIVING	TCGA-A2-A0ET-01	High	C3-BRCA/Luminal	cluster 4	BRCA CIMP c7		BRCA nonbasal-like c7	miRNA cluster 6	cluster 1	mutation c1uster 9	TCGA-A2-A0ET	TCGA Breast Cancer (BRCA)	breast invasive carcinoma	Breast					58	Right Upper Outer Quadrant	Axillary lymph node dissection alone
TCGA-A2-A0EU-01	Stage IA	79	4	Stage I	1043		Positive	FEMALE	Negative	3	3	3	Negative	M0	Negative	N0	1043	0	LumA	Luminal A	Positive	ReacI	-10	-3	followup	T1	T1	LIVING	TCGA-A2-A0EU-01	Squamous	C3-BRCA/Luminal	cluster 2	BRCA CIMP c7	BRCA nonbasal-like c8	BRCA nonbasal-like c7	miRNA cluster 14	cluster 2	mutation c1uster 9	TCGA-A2-A0EU	TCGA Breast Cancer (BRCA)	breast invasive carcinoma	Breast					79	Right Lower Outer Quadrant	Sentinel node biopsy alone
TCGA-A2-A0EV-01	Stage IA	80	3	Stage I	968		Positive	FEMALE	Negative	3	4	3	Negative	M0	Negative	N0	968	0	LumA	Luminal A	Positive	ReacI	0	-4	followup	T1	T1	LIVING	TCGA-A2-A0EV-01	High	C3-BRCA/Luminal	cluster 2	BRCA non-CIMP c9	BRCA nonbasal-like c8	BRCA nonbasal-like c7	miRNA cluster 4	cluster 4	mutation cluster 4	TCGA-A2-A0EV	TCGA Breast Cancer (BRCA)	breast invasive carcinoma	Breast					80	Left	Sentinel node biopsy alone
TCGA-A2-A0EW-01	Stage IIIC	53	2	No_Conversion	904		Positive	FEMALE	Negative	3	4	3	Negative	M0	Positive	N3	904	0	LumA	Luminal A	Positive	ReacI	-5	-7	followup	T1	T1	LIVING	TCGA-A2-A0EW-01	Kirc+	C3-BRCA/Luminal	cluster 2	BRCA non-CIMP c9	BRCA nonbasal-like c8	BRCA nonbasal-like c7	miRNA cluster 13	cluster 6	mutation cluster 4	TCGA-A2-A0EW	TCGA Breast Cancer (BRCA)	breast invasive carcinoma	Breast	YES	YES			53	Right Lower Outer Quadrant	Sentinel lymph node biopsy plus axillary dissection
TCGA-A2-A0EX-01	Stage IIB	46	4	Stage IIB	549		Positive	FEMALE	Negative	1	4	3	Negative	M0	Negative	N0	549	0	LumA	Luminal A	Positive	ReacI	-5	-7	enrollment	T_Other	T3	LIVING	TCGA-A2-A0EX-01	Kirc+	C3-BRCA/Luminal	cluster 4	BRCA CIMP c7	BRCA nonbasal-like c8	BRCA nonbasal-like c7	miRNA cluster 4	cluster 4	mutation cluster 4	TCGA-A2-A0EX	TCGA Breast Cancer (BRCA)	breast invasive carcinoma	Breast	NO	NO			46	Left Upper Outer Quadrant	Sentinel node biopsy alone
TCGA-A2-A0EY-01	Stage IIB	62	3	No_Conversion	735		Positive	FEMALE	Positive	1	1	4	Negative	M0	Positive	N1	735	0	LumB	Luminal B	Negative	Her2	-2	-5	followup	T_Other	T2	LIVING	TCGA-A2-A0EY-01	High	C3-BRCA/Luminal	cluster 4	BRCA non-CIMP c9	BRCA basal-like c6	BRCA nonbasal-like c7	miRNA cluster 6	cluster 1	mutation cluster 3	TCGA-A2-A0EY	TCGA Breast Cancer (BRCA)	breast invasive carcinoma	Breast					62	Right Upper Outer Quadrant	Sentinel lymph node biopsy plus axillary dissection
TCGA-A2-A0ST-01	Stage IIA	62	1	No_Conversion	1643		Negative	FEMALE	Negative	2	2	2	Negative	M0	Positive	N1	1643	0	Basal	Basal-like	Negative	Basal	-13	-12	enrollment	T1	T1	LIVING	TCGA-A2-A0ST-01	Kirc+	C4-BRCA/Basal	cluster 5	Low purity c2	BRCA basal-like c6	BRCA basal-like c8	miRNA cluster 7	cluster 3	mutation c1uster 9	TCGA-A2-A0ST	TCGA Breast Cancer (BRCA)	breast invasive carcinoma	Breast					62	Right Upper Outer Quadrant	Sentinel lymph node biopsy plus axillary dissection
TCGA-A2-A0SU-01	Stage IIA	66	2	Stage IIA	1661		Positive	FEMALE	Negative	3	3	3	Negative	M0	Negative	N0	1661	0	LumA	Luminal A	Positive	LumA/B	0	0	followup	T_Other	T2	LIVING	TCGA-A2-A0SU-01	Kirc+	C3-BRCA/Luminal	cluster 2	BRCA non-CIMP c9	BRCA nonbasal-like c8	BRCA nonbasal-like c7	miRNA cluster 14	cluster 2	mutation c1uster 9	TCGA-A2-A0SU	TCGA Breast Cancer (BRCA)	breast invasive carcinoma	Breast					66	Left	Sentinel node biopsy alone
TCGA-A2-A0SV-01	Stage IV	63	5	No_Conversion	825	825	Positive	FEMALE	Negative	3	3	4	Positive	M1	Positive	N2	825	1	LumB	Luminal B	Positive	Basal	-2	-3	followup	T_Other	T2	DECEASED	TCGA-A2-A0SV-01	Iq	C3-BRCA/Luminal	cluster 2	BRCA non-CIMP c9	BRCA nonbasal-like c8	BRCA nonbasal-like c7	miRNA cluster 4	cluster 6	mutation cluster 5	TCGA-A2-A0SV	TCGA Breast Cancer (BRCA)	breast invasive carcinoma	Breast	YES	NO		NO	63	Right	Axillary lymph node dissection alone
TCGA-A2-A0SW-01	Stage IV	82	4	No_Conversion	1364	1364	Positive	FEMALE	Negative	1	1	4	Positive	M1	Positive	N2	1364	1	LumB	Luminal B	Negative	Basal	-2	-5	followup	T_Other	T2	DECEASED	TCGA-A2-A0SW-01	High	C3-BRCA/Luminal	cluster 4	BRCA CIMP c7	BRCA nonbasal-like c8	BRCA nonbasal-like c7	miRNA cluster 7	cluster 3	mutation cluster 3	TCGA-A2-A0SW	TCGA Breast Cancer (BRCA)	breast invasive carcinoma	Breast	NO	NO	NO		82	Right	Sentinel lymph node biopsy plus axillary dissection
TCGA-A2-A0SX-01	Stage IA	48	1	Stage I	1288		Negative	FEMALE	Negative	2	2	2	Negative	M0	Negative	N0	1288	0	Basal	Basal-like	Negative	Basal	-13	-12	followup	T1	T1	LIVING	TCGA-A2-A0SX-01	High	C4-BRCA/Basal	cluster 5	BRCA basal-like c8	BRCA basal-like c6	BRCA basal-like c8	miRNA cluster 4	cluster 4	mutation cluster 5	TCGA-A2-A0SX	TCGA Breast Cancer (BRCA)	breast invasive carcinoma	Breast	YES	NO	YES		48	Left Upper Inner Quadrant	Sentinel node biopsy alone
TCGA-A2-A0SY-01	Stage IIIA	62	2	No_Conversion	1347		Positive	FEMALE	Positive				Negative	M0	Positive	N1	1347	0	LumA	Luminal A	Positive		-5	-7	followup	T_Other	T3	LIVING	TCGA-A2-A0SY-01	Iq	C3-BRCA/Luminal	cluster 4	BRCA CIMP c7		BRCA nonbasal-like c7	miRNA cluster 13	cluster 6	mutation cluster 4	TCGA-A2-A0SY	TCGA Breast Cancer (BRCA)	breast invasive carcinoma	Breast					62	Left Upper Outer Quadrant	Sentinel lymph node biopsy plus axillary dissection
TCGA-A2-A0T0-01	Stage IIB	59	1	No_Conversion	533		Negative	FEMALE	Negative	2	2	2	Negative	M0	Positive	N1	533	0	Basal	Basal-like	Negative	Basal	-13	0	followup	T_Other	T2	LIVING	TCGA-A2-A0T0-01	High	C4-BRCA/Basal	cluster 5	BRCA basal-like c8	BRCA basal-like c6	BRCA basal-like c8	miRNA cluster 11	cluster 5	mutation cluster 12	TCGA-A2-A0T0	TCGA Breast Cancer (BRCA)	breast invasive carcinoma	Breast					59	Left Lower Outer Quadrant	Axillary lymph node dissection alone
TCGA-A2-A0T1-01	Stage IIIC	55	4	No_Conversion	520		Negative	FEMALE	Positive	1	1	1	Negative	M0	Positive	N3	520	0	Her2	HER2-enriched	Negative	Her2	-11	-5	followup	T_Other	T3	LIVING	TCGA-A2-A0T1-01	High	C3-BRCA/Luminal	cluster 5	Cluster 5	BRCA basal-like c6	BRCA nonbasal-like c7	miRNA cluster 4	cluster 4	mutation cluster 5	TCGA-A2-A0T1	TCGA Breast Cancer (BRCA)	breast invasive carcinoma	Breast					55	Right Upper Outer Quadrant	Axillary lymph node dissection alone
TCGA-A2-A0T2-01	Stage IV	66	3	No_Conversion	240	240	Negative	FEMALE	Negative	2	2	2	Positive	M1	Positive	N3	240	1	Basal	Basal-like	Negative	Basal	-13	0	followup	T_Other	T3	DECEASED	TCGA-A2-A0T2-01	High	C4-BRCA/Basal	cluster 5	BRCA basal-like c8	BRCA basal-like c6	BRCA basal-like c8	miRNA cluster 7	cluster 3	mutation cluster 5	TCGA-A2-A0T2	TCGA Breast Cancer (BRCA)	breast invasive carcinoma	Breast	NO	NO		NO	66	Right	Axillary lymph node dissection alone
TCGA-A2-A0T3-01	Stage IA	37	3	Stage IIA	569		Positive	FEMALE	Negative	4	5	4	Negative	M0	Positive	N1	569	0	LumB	Luminal B	Positive	ReacII	0	-3	followup	T1	T1	LIVING	TCGA-A2-A0T3-01	High	C3-BRCA/Luminal	cluster 3	BRCA CIMP c7	KIRC-like c1	BRCA nonbasal-like c7	miRNA cluster 4	cluster 7	mutation cluster 5	TCGA-A2-A0T3	TCGA Breast Cancer (BRCA)	breast invasive carcinoma	Breast					37	Right Upper Outer Quadrant	Sentinel lymph node biopsy plus axillary dissection
TCGA-A2-A0T4-01	Stage IIA	62	2	Stage IIA	624		Positive	FEMALE	Negative	1	4	3	Negative	M0	Negative	N0	624	0	LumA	Luminal B	Positive	ReacI	-5	-7	followup	T_Other	T2	LIVING	TCGA-A2-A0T4-01	Iq	C3-BRCA/Luminal	cluster 4	BRCA CIMP c7	BRCA nonbasal-like c8	BRCA nonbasal-like c7	miRNA cluster 4	cluster 4	mutation cluster 4	TCGA-A2-A0T4	TCGA Breast Cancer (BRCA)	breast invasive carcinoma	Breast					62	Right Upper Inner Quadrant	Other (specify)
TCGA-A2-A0T5-01	Stage IIB	39	2	Stage IIA	531		Positive	FEMALE	Negative				Negative	M0	Negative	N0	531	0	LumA	Luminal A	Positive	LumA	-5	-3	followup	T_Other	T2	LIVING	TCGA-A2-A0T5-01	BRCA-LUAD+	C3-BRCA/Luminal	cluster 2	BRCA non-CIMP c9	BRCA nonbasal-like c8	BRCA nonbasal-like c7	miRNA cluster 4	cluster 6		TCGA-A2-A0T5	TCGA Breast Cancer (BRCA)	breast invasive carcinoma	Breast					39	Left	Sentinel node biopsy alone
TCGA-A2-A0T6-01	Stage IIB	50	2	Stage IIB	575		Positive	FEMALE	Negative	1	4	3	Negative	M0	Negative	N0	575	0	LumA	Luminal A	Positive	ReacI	-5	-7	followup	T_Other	T3	LIVING	TCGA-A2-A0T6-01	Iq	C3-BRCA/Luminal	cluster 4	BRCA CIMP c7	BRCA nonbasal-like c8	BRCA nonbasal-like c7	miRNA cluster 14	cluster 2	mutation c1uster 9	TCGA-A2-A0T6	TCGA Breast Cancer (BRCA)	breast invasive carcinoma	Breast					50	Left	Sentinel node biopsy alone
TCGA-A2-A0T7-01	Stage IIA	51	2	Stage IIA	631		Positive	FEMALE	Negative	3	4	3	Negative	M0	Negative	N0	631	0	LumA	Luminal A	Positive	ReacI	-3	0	followup	T_Other	T2	LIVING	TCGA-A2-A0T7-01	High	C3-BRCA/Luminal	cluster 1	BRCA CIMP c7	BRCA nonbasal-like c8	BRCA nonbasal-like c7	miRNA cluster 4	cluster 4	mutation cluster 4	TCGA-A2-A0T7	TCGA Breast Cancer (BRCA)	breast invasive carcinoma	Breast					51	Right Upper Inner Quadrant	Sentinel node biopsy alone
TCGA-A2-A0YC-01	Stage IIB	59	2	No_Conversion	989		Positive	FEMALE	Negative	1	3	3	Negative	M0	Positive	N1	989	0	LumA	Luminal A	Positive	ReacII	-12	-3	followup	T_Other	T2	LIVING	TCGA-A2-A0YC-01	Iq	C3-BRCA/Luminal	cluster 4	BRCA CIMP c7	KIRC-like c1	BRCA nonbasal-like c7	miRNA cluster 4	cluster 4	mutation cluster 4	TCGA-A2-A0YC	TCGA Breast Cancer (BRCA)	breast invasive carcinoma	Breast	YES	NO	YES		59	Right Upper Inner Quadrant	Other (specify)
TCGA-A2-A0YD-01	Stage IIB	63	2	Stage IIB	769		Positive	FEMALE	Negative	3	3	3	Negative	M0	Negative	N0	769	0	LumA	Luminal A	Positive	LumA	-5	-7	followup	T_Other	T3	LIVING	TCGA-A2-A0YD-01	Iq	C3-BRCA/Luminal	cluster 1	BRCA CIMP c7	BRCA nonbasal-like c8	BRCA nonbasal-like c7	miRNA cluster 4	cluster 4	mutation c1uster 9	TCGA-A2-A0YD	TCGA Breast Cancer (BRCA)	breast invasive carcinoma	Breast					63	Left Upper Outer Quadrant	Sentinel node biopsy alone
TCGA-A2-A0YE-01	Stage IIB	48	3	No_Conversion	553		Negative	FEMALE	Negative				Negative	M0	Positive	N1	553	0	Basal	Basal-like	Negative	X	-13	-12	followup	T_Other	T2	LIVING	TCGA-A2-A0YE-01	High	C4-BRCA/Basal	cluster 5	BRCA basal-like c8	BRCA basal-like c6	BRCA basal-like c8				TCGA-A2-A0YE	TCGA Breast Cancer (BRCA)	breast invasive carcinoma	Breast					48	Right Upper Outer Quadrant	Sentinel lymph node biopsy plus axillary dissection
TCGA-A2-A0YF-01	Stage IA	67	2	Stage I	469		Positive	FEMALE	Negative	3	3	3	Negative	M0	Negative	N0	469	0	LumA	Luminal A	Negative	ReacII	-12	-3	followup	T1	T1	LIVING	TCGA-A2-A0YF-01	Iq	C3-BRCA/Luminal	cluster 2	BRCA non-CIMP c9	KIRC-like c1	BRCA nonbasal-like c7	miRNA cluster 6	cluster 1	mutation c1uster 9	TCGA-A2-A0YF	TCGA Breast Cancer (BRCA)	breast invasive carcinoma	Breast					67	Right	Sentinel node biopsy alone
TCGA-A2-A0YG-01	Stage IIIC	63	5	No_Conversion	665		Positive	FEMALE	Positive	1	1	4	Negative	M0	Positive	N3	665	0	LumB	Luminal B	Positive	Her2	-2	-5	followup	T_Other	T2	LIVING	TCGA-A2-A0YG-01	High	C3-BRCA/Luminal	cluster 4	BRCA CIMP c7	BRCA basal-like c6	BRCA nonbasal-like c7	miRNA cluster 4	cluster 4	mutation cluster 2	TCGA-A2-A0YG	TCGA Breast Cancer (BRCA)	breast invasive carcinoma	Breast					63	Left Upper Outer Quadrant	Axillary lymph node dissection alone
TCGA-A2-A0YH-01	Stage IIIA	53	4	No_Conversion	658		Positive	FEMALE	Negative	3	3	4	Negative	M0	Positive	N2	658	0	LumB	Luminal B	Positive	LumA/B	-2	-5	followup	T_Other	T2	LIVING	TCGA-A2-A0YH-01	BRCA-LUAD+	C3-BRCA/Luminal	cluster 2	Cluster 5	BRCA nonbasal-like c8	BRCA nonbasal-like c7	miRNA cluster 4	cluster 4	mutation cluster 3	TCGA-A2-A0YH	TCGA Breast Cancer (BRCA)	breast invasive carcinoma	Breast					53	Left Lower Outer Quadrant	Axillary lymph node dissection alone
TCGA-A2-A0YI-01	Stage IA	62	3	Stage I	441		Positive	FEMALE	Negative	1	4	3	Negative	M0	Negative	N0	441	0	LumA	Luminal A	Positive	ReacI	-12	-4	followup	T1	T1	LIVING	TCGA-A2-A0YI-01	Iq	C3-BRCA/Luminal	cluster 1	BRCA non-CIMP c9	BRCA nonbasal-like c8	BRCA nonbasal-like c7	miRNA cluster 4	cluster 4	mutation cluster 4	TCGA-A2-A0YI	TCGA Breast Cancer (BRCA)	breast invasive carcinoma	Breast					62	Right Upper Outer Quadrant	Other (specify)
TCGA-A2-A0YJ-01	Stage IIIA	39	3	No_Conversion	565		Positive	FEMALE	Negative				Negative	M0	Positive	N2	565	0	Basal	Basal-like	Negative	Basal	-13	-12	followup	T_Other	T3	LIVING	TCGA-A2-A0YJ-01	COAD-READ	C4-BRCA/Basal	cluster 5	BRCA basal-like c8	BRCA basal-like c6	BRCA basal-like c8			mutation cluster 5	TCGA-A2-A0YJ	TCGA Breast Cancer (BRCA)	breast invasive carcinoma	Breast	NO	NO	YES		39	Left	Axillary lymph node dissection alone
TCGA-A2-A0YK-01	Stage IIA	61	5	Stage IIA	587		Positive	FEMALE	Negative	3	4	3	Negative	M0	Negative	N0	587	0	Normal	Normal-like	Negative	ReacII	-5	-7	followup	T_Other	T2	LIVING	TCGA-A2-A0YK-01	Kirc+	C3-BRCA/Luminal	cluster 1	BRCA non-CIMP c9	KIRC-like c1	BRCA nonbasal-like c7	miRNA cluster 14	cluster 6	mutation cluster 4	TCGA-A2-A0YK	TCGA Breast Cancer (BRCA)	breast invasive carcinoma	Breast					61	Left Upper Inner Quadrant|Left Upper Outer Quadrant|Left Lower Inner Quadrant|Left Lower Outer Quadrant	Sentinel node biopsy alone
TCGA-A2-A0YL-01	Stage IIIA	48	2	No_Conversion	445		Positive	FEMALE	Negative	3	4	3	Negative	M0	Positive	N2	445	0	LumA	Luminal A	Positive	ReacI	-5	-7	followup	T_Other	T3	LIVING	TCGA-A2-A0YL-01	Iq	C3-BRCA/Luminal	cluster 1	BRCA non-CIMP c9	BRCA nonbasal-like c8	BRCA nonbasal-like c7	miRNA cluster 13	cluster 6	mutation cluster 4	TCGA-A2-A0YL	TCGA Breast Cancer (BRCA)	breast invasive carcinoma	Breast					48	Left Upper Inner Quadrant|Left Upper Outer Quadrant|Left Lower Inner Quadrant|Left Lower Outer Quadrant	Sentinel lymph node biopsy plus axillary dissection
TCGA-A2-A0YM-01	Stage IIA	67	3	Stage IIA	964		Negative	FEMALE	Negative	2	2	2	Negative	M0	Negative	N0	964	0	Basal	Basal-like	Negative	Basal	-13	-12	followup	T_Other	T2	LIVING	TCGA-A2-A0YM-01	High	C4-BRCA/Basal	cluster 5	BRCA basal-like c8	OV-like c4	BRCA basal-like c8	miRNA cluster 12	cluster 5	mutation cluster 13	TCGA-A2-A0YM	TCGA Breast Cancer (BRCA)	breast invasive carcinoma	Breast					67	Left Upper Outer Quadrant	Other (specify)
TCGA-A2-A0YT-01	Stage IIIB	56		No_Conversion	669	723	Positive	FEMALE	Negative				Negative	M0	Positive	N2	723	1	LumB		Negative				followup	T_Other	T4	DECEASED	TCGA-A2-A0YT-01	High	C3-BRCA/Luminal		BRCA CIMP c7	BRCA nonbasal-like c8	BRCA nonbasal-like c7	miRNA cluster 6		mutation cluster 3	TCGA-A2-A0YT	TCGA Breast Cancer (BRCA)	breast invasive carcinoma	Breast					56	Left Upper Outer Quadrant	Axillary lymph node dissection alone
TCGA-A2-A1FV-01	Stage IIB	74	4	Stage IIB	460		Positive	FEMALE	Negative				Negative	M0	Negative	N0	460	0	LumA		Positive				enrollment	T_Other	T3	LIVING	TCGA-A2-A1FV-01	BRCA-LUAD+	C3-BRCA/Luminal	cluster 3	BRCA CIMP c7	BRCA nonbasal-like c8	BRCA nonbasal-like c7	miRNA cluster 12	cluster 6	mutation c1uster 9	TCGA-A2-A1FV	TCGA Breast Cancer (BRCA)	breast invasive carcinoma	Breast					74	Left	Sentinel node biopsy alone
TCGA-A2-A1FW-01	Stage IIIA	62	3	Stage IIIA	221		Positive	FEMALE	Negative				Negative	M0	Positive	N2	221	0	LumB		Negative				enrollment	T_Other	T3	LIVING	TCGA-A2-A1FW-01	High	C3-BRCA/Luminal	cluster 4	BRCA CIMP c7	BRCA nonbasal-like c8	BRCA nonbasal-like c7	miRNA cluster 4	cluster 6	mutation c1uster 9	TCGA-A2-A1FW	TCGA Breast Cancer (BRCA)	breast invasive carcinoma	Breast					62	Right Upper Outer Quadrant	Sentinel lymph node biopsy plus axillary dissection
TCGA-A2-A1FX-01	Stage IIIA	61	4	Stage IIIA	935		Positive	FEMALE	Negative				Negative	M0	Positive	N2	935	0	LumB		Positive				enrollment	T_Other	T3	LIVING	TCGA-A2-A1FX-01	BRCA-LUAD+	C3-BRCA/Luminal	cluster 4	BRCA CIMP c7	BRCA nonbasal-like c8	BRCA nonbasal-like c7	miRNA cluster 4	cluster 4	mutation c1uster 9	TCGA-A2-A1FX	TCGA Breast Cancer (BRCA)	breast invasive carcinoma	Breast					61	Right Upper Outer Quadrant	Sentinel lymph node biopsy plus axillary dissection
TCGA-A2-A1FZ-01	Stage IIA	63	3	Stage IIA	409		Positive	FEMALE	Negative				Negative	M0	Negative	N0	409	0	LumA		Positive				enrollment	T_Other	T2	LIVING	TCGA-A2-A1FZ-01	Iq	C3-BRCA/Luminal	cluster 4	BRCA CIMP c7	KIRC-like c1	BRCA nonbasal-like c7	miRNA c1uster 9	cluster 6	mutation cluster 4	TCGA-A2-A1FZ	TCGA Breast Cancer (BRCA)	breast invasive carcinoma	Breast					63	Right	Sentinel node biopsy alone
TCGA-A2-A1G0-01	Stage IIB	49	3	Stage IIB	380		Positive	FEMALE	Negative				Negative	M0	Positive	N1	380	0	LumA		Positive				enrollment	T_Other	T2	LIVING	TCGA-A2-A1G0-01	High	C3-BRCA/Luminal	cluster 2	BRCA non-CIMP c9	BRCA nonbasal-like c8	BRCA nonbasal-like c7	miRNA cluster 14	cluster 6	mutation cluster 4	TCGA-A2-A1G0	TCGA Breast Cancer (BRCA)	breast invasive carcinoma	Breast					49	Left Upper Inner Quadrant	Sentinel lymph node biopsy plus axillary dissection
TCGA-A2-A1G1-01	Stage IIB	85	4	Stage IIB	371		Negative	FEMALE	Positive				Negative	M0	Positive	N1	371	0	Basal		Negative				enrollment	T_Other	T2	LIVING	TCGA-A2-A1G1-01	High	C4-BRCA/Basal	cluster 5	BRCA basal-like c8	KIRC-like c1	BRCA basal-like c8	miRNA cluster 14	cluster 6	mutation cluster 5	TCGA-A2-A1G1	TCGA Breast Cancer (BRCA)	breast invasive carcinoma	Breast					85	Right Upper Outer Quadrant	Sentinel lymph node biopsy plus axillary dissection
TCGA-A2-A1G4-01	Stage IIIA	71	4	Stage IIIA	372		Positive	FEMALE	Negative				Negative	M0	Positive	N1	372	0	LumB		Positive				enrollment	T_Other	T3	LIVING	TCGA-A2-A1G4-01	Kirc+	C3-BRCA/Luminal	cluster 4	BRCA CIMP c7	BRCA nonbasal-like c8	BRCA nonbasal-like c7	miRNA cluster 12	cluster 5	mutation c1uster 9	TCGA-A2-A1G4	TCGA Breast Cancer (BRCA)	breast invasive carcinoma	Breast					71	Right Lower Outer Quadrant	Axillary lymph node dissection alone
TCGA-A2-A1G6-01	Stage IIIA	50	1	Stage IIIA	132		Negative	FEMALE	Negative				Negative	M0	Positive	N2	132	0	Normal		Negative				enrollment	T_Other	T2	LIVING	TCGA-A2-A1G6-01	Quiet	C5-KIRC	cluster 5	Low purity c2	KIRC-like c1	BRCA nonbasal-like c7	miRNA cluster 13	cluster 6	mutation c1uster 9	TCGA-A2-A1G6	TCGA Breast Cancer (BRCA)	breast invasive carcinoma	Breast					50	Right	Axillary lymph node dissection alone
TCGA-A2-A259-01	Stage IA	70	4	Stage I	1285		Positive	FEMALE	Negative				Negative	M0	Negative	N0	1285	0	LumA		Positive				enrollment	T1	T1	LIVING	TCGA-A2-A259-01	Kirc+	C3-BRCA/Luminal	cluster 1	BRCA non-CIMP c9	KIRC-like c1	BRCA nonbasal-like c7	miRNA cluster 14		mutation c1uster 9	TCGA-A2-A259	TCGA Breast Cancer (BRCA)	breast invasive carcinoma	Breast					70	Left	Sentinel node biopsy alone
TCGA-A2-A25A-01	Stage IIA	44	2	Stage IIA	2968		Positive	FEMALE	Negative				Negative	M0	Negative	N0	2968	0	Normal		Positive				enrollment	T_Other	T2	LIVING	TCGA-A2-A25A-01	Iq	C3-BRCA/Luminal	cluster 4	BRCA non-CIMP c9	BRCA nonbasal-like c8	BRCA nonbasal-like c7	miRNA cluster 5		mutation cluster 4	TCGA-A2-A25A	TCGA Breast Cancer (BRCA)	breast invasive carcinoma	Breast					44	Left Upper Inner Quadrant	Axillary lymph node dissection alone
TCGA-A2-A25B-01	Stage IIB	39	5	Stage IIB	258		Positive	FEMALE	Negative				Negative	M0	Positive	N1	258	0	LumB		Positive				enrollment	T_Other	T2	LIVING	TCGA-A2-A25B-01	High	C3-BRCA/Luminal	cluster 4	BRCA CIMP c7	BRCA nonbasal-like c8	BRCA nonbasal-like c7	miRNA cluster 2	cluster 5	mutation c1uster 9	TCGA-A2-A25B	TCGA Breast Cancer (BRCA)	breast invasive carcinoma	Breast					39	Left Upper Outer Quadrant	Sentinel lymph node biopsy plus axillary dissection
TCGA-A2-A25C-01	Stage IIB	50	3	Stage IIB	285		Positive	FEMALE	Negative				Negative	M0	Positive	N1	285	0	LumB		Positive				enrollment	T_Other	T2	LIVING	TCGA-A2-A25C-01	BRCA-LUAD+	C3-BRCA/Luminal	cluster 4	BRCA non-CIMP c9	BRCA nonbasal-like c8	BRCA nonbasal-like c7	miRNA cluster 2	cluster 5	mutation cluster 4	TCGA-A2-A25C	TCGA Breast Cancer (BRCA)	breast invasive carcinoma	Breast					50	Left Lower Outer Quadrant	Sentinel lymph node biopsy plus axillary dissection
TCGA-A2-A25D-01	Stage IIIC	90	4	Stage IIIC	243		Positive	FEMALE	Negative				Negative	M0	Positive	N3	243	0	LumA		Negative				enrollment	T_Other	T2	LIVING	TCGA-A2-A25D-01	BRCA-LUAD+	C3-BRCA/Luminal	cluster 4	BRCA non-CIMP c9	BRCA nonbasal-like c8	BRCA nonbasal-like c7	miRNA cluster 13		mutation cluster 4	TCGA-A2-A25D	TCGA Breast Cancer (BRCA)	breast invasive carcinoma	Breast					90	Right Upper Outer Quadrant	Axillary lymph node dissection alone
TCGA-A2-A25E-01	Stage IIIA	34	5	Stage IIIA	2511		Positive	FEMALE	Equivocal				Negative	M0	Positive	N2	2511	0	LumB		Positive				enrollment	T_Other	T2	LIVING	TCGA-A2-A25E-01	High	C3-BRCA/Luminal	cluster 4	BRCA CIMP c7	BRCA nonbasal-like c8	BRCA nonbasal-like c7	miRNA cluster 2	cluster 5	mutation c1uster 9	TCGA-A2-A25E	TCGA Breast Cancer (BRCA)	breast invasive carcinoma	Breast	YES	NO			34	Left Upper Outer Quadrant	Axillary lymph node dissection alone
TCGA-A2-A25F-01	Stage IIA	66	1	Stage IIA	113		Negative	FEMALE	Negative				Negative	M0	Negative	N0	113	0	Basal		Positive				enrollment	T_Other	T2	LIVING	TCGA-A2-A25F-01	Kirc+	C4-BRCA/Basal	cluster 1	Low purity c2	BRCA basal-like c6	BRCA basal-like c8			mutation c1uster 9	TCGA-A2-A25F	TCGA Breast Cancer (BRCA)	breast invasive carcinoma	Breast					66	Right Upper Outer Quadrant	Sentinel node biopsy alone
TCGA-A2-A3KC-01																			LumA										TCGA-A2-A3KC-01	Iq	C3-BRCA/Luminal		BRCA CIMP c7	BRCA nonbasal-like c8	BRCA nonbasal-like c7	miRNA cluster 4			TCGA-A2-A3KC	TCGA Breast Cancer (BRCA)	breast invasive carcinoma	Breast					55	Right Lower Outer Quadrant	Sentinel lymph node biopsy plus axillary dissection
TCGA-A2-A3KD-01																			LumA										TCGA-A2-A3KD-01	Iq	C3-BRCA/Luminal		BRCA non-CIMP c9	BRCA nonbasal-like c8	BRCA nonbasal-like c7	miRNA cluster 4			TCGA-A2-A3KD	TCGA Breast Cancer (BRCA)	breast invasive carcinoma	Breast					47	Right Upper Outer Quadrant	Sentinel lymph node biopsy plus axillary dissection
TCGA-A2-A3XS-01																													TCGA-A2-A3XS-01							miRNA cluster 4			TCGA-A2-A3XS	TCGA Breast Cancer (BRCA)	breast invasive carcinoma	Breast	YES	NO	NO		62	Left Upper Outer Quadrant	Sentinel lymph node biopsy plus axillary dissection
TCGA-A2-A3XT-01																													TCGA-A2-A3XT-01					BRCA basal-like c6		miRNA cluster 4			TCGA-A2-A3XT	TCGA Breast Cancer (BRCA)	breast invasive carcinoma	Breast					45	Left	Other (specify)
TCGA-A2-A3XU-01																													TCGA-A2-A3XU-01					BRCA basal-like c6		miRNA cluster 4			TCGA-A2-A3XU	TCGA Breast Cancer (BRCA)	breast invasive carcinoma	Breast	YES	NO			35	Left	Sentinel lymph node biopsy plus axillary dissection
TCGA-A2-A3XV-01																													TCGA-A2-A3XV-01					BRCA basal-like c6					TCGA-A2-A3XV	TCGA Breast Cancer (BRCA)	breast invasive carcinoma	Breast					46	Right	Sentinel node biopsy alone
TCGA-A2-A3XW-01																													TCGA-A2-A3XW-01					BRCA nonbasal-like c8					TCGA-A2-A3XW	TCGA Breast Cancer (BRCA)	breast invasive carcinoma	Breast					42	Right	Sentinel lymph node biopsy plus axillary dissection
TCGA-A2-A3XX-01																													TCGA-A2-A3XX-01					KIRC-like c1					TCGA-A2-A3XX	TCGA Breast Cancer (BRCA)	breast invasive carcinoma	Breast					49	Left Lower Outer Quadrant	Sentinel node biopsy alone
TCGA-A2-A3XY-01																													TCGA-A2-A3XY-01										TCGA-A2-A3XY	TCGA Breast Cancer (BRCA)	breast invasive carcinoma	Breast	NO	YES			49	Left Upper Outer Quadrant	Axillary lymph node dissection alone
TCGA-A2-A3XZ-01																													TCGA-A2-A3XZ-01					BRCA basal-like c6					TCGA-A2-A3XZ	TCGA Breast Cancer (BRCA)	breast invasive carcinoma	Breast					46	Left Upper Inner Quadrant|Left Upper Outer Quadrant	Sentinel node biopsy alone
TCGA-A2-A3Y0-01																													TCGA-A2-A3Y0-01										TCGA-A2-A3Y0	TCGA Breast Cancer (BRCA)	breast invasive carcinoma	Breast					57	Left Upper Outer Quadrant	Axillary lymph node dissection alone
TCGA-A2-A4RW-01																													TCGA-A2-A4RW-01										TCGA-A2-A4RW	TCGA Breast Cancer (BRCA)	breast invasive carcinoma	Breast					49	Right|Right Upper Outer Quadrant	Axillary lymph node dissection alone
TCGA-A2-A4RX-01																													TCGA-A2-A4RX-01										TCGA-A2-A4RX	TCGA Breast Cancer (BRCA)	breast invasive carcinoma	Breast					67	Right Lower Outer Quadrant	Sentinel node biopsy alone
TCGA-A2-A4RY-01																													TCGA-A2-A4RY-01										TCGA-A2-A4RY	TCGA Breast Cancer (BRCA)	breast invasive carcinoma	Breast					46	Right	Axillary lymph node dissection alone
TCGA-A2-A4S0-01																													TCGA-A2-A4S0-01										TCGA-A2-A4S0	TCGA Breast Cancer (BRCA)	breast invasive carcinoma	Breast					77	Right Upper Outer Quadrant	Sentinel node biopsy alone
TCGA-A2-A4S1-01																													TCGA-A2-A4S1-01										TCGA-A2-A4S1	TCGA Breast Cancer (BRCA)	breast invasive carcinoma	Breast					66	Right Upper Outer Quadrant	Sentinel node biopsy alone
TCGA-A2-A4S2-01																													TCGA-A2-A4S2-01										TCGA-A2-A4S2	TCGA Breast Cancer (BRCA)	breast invasive carcinoma	Breast					62	Right	Axillary lymph node dissection alone
TCGA-A2-A4S3-01																													TCGA-A2-A4S3-01										TCGA-A2-A4S3	TCGA Breast Cancer (BRCA)	breast invasive carcinoma	Breast					59	Left Upper Outer Quadrant	Axillary lymph node dissection alone
TCGA-A7-A0CD-01	Stage IA	66	3	Stage I	372		Positive	FEMALE	Negative	4	3	3	Negative	M0	Negative	N0	372	0	LumA	Luminal A	Positive	LumA	-10	-3	followup	T1	T1	LIVING	TCGA-A7-A0CD-01	High	C3-BRCA/Luminal	cluster 3	BRCA CIMP c7	BRCA nonbasal-like c8	BRCA nonbasal-like c7	miRNA cluster 14	cluster 2	mutation c1uster 9	TCGA-A7-A0CD	TCGA Breast Cancer (BRCA)	breast invasive carcinoma	Breast					66	Left	Sentinel node biopsy alone
TCGA-A7-A0CE-01	Stage IIA	57	1	Stage IIA	309		Negative	FEMALE	Negative	2	2	2	Negative	M0	Negative	N0	309	0	Basal	Basal-like	Negative	Basal	-13	0	followup	T_Other	T2	LIVING	TCGA-A7-A0CE-01	High	C4-BRCA/Basal	cluster 5	BRCA basal-like c8	BRCA basal-like c6	BRCA basal-like c8	miRNA cluster 4	cluster 5	mutation cluster 5	TCGA-A7-A0CE	TCGA Breast Cancer (BRCA)	breast invasive carcinoma	Breast					57	Left	Sentinel lymph node biopsy plus axillary dissection
TCGA-A7-A0CE-11		57			309			FEMALE									309	0							followup			LIVING	TCGA-A7-A0CE-11		C4-BRCA/Basal							mutation cluster 5	TCGA-A7-A0CE	TCGA Breast Cancer (BRCA)	breast invasive carcinoma	Breast					57	Left	Sentinel lymph node biopsy plus axillary dissection
TCGA-A7-A0CG-01	Stage IIA	78	2	Stage IIA	230		Positive	FEMALE	Negative	3	4	3	Negative	M0	Negative	N0	230	0	LumA	Luminal A	Negative	ReacI	-5	-7	followup	T_Other	T2	LIVING	TCGA-A7-A0CG-01	Iq	C3-BRCA/Luminal	cluster 1	BRCA non-CIMP c9	BRCA nonbasal-like c8	BRCA nonbasal-like c7	miRNA cluster 7	cluster 7	mutation cluster 4	TCGA-A7-A0CG	TCGA Breast Cancer (BRCA)	breast invasive carcinoma	Breast					78	Right Upper Outer Quadrant|Right	Sentinel lymph node biopsy plus axillary dissection
TCGA-A7-A0CH-01	Stage IIA	79	2	Stage IIA	232			FEMALE	Negative	3	3	3	Negative	M0	Negative	N0	232	0	LumA	Luminal A		LumA	-12	-3	followup	T_Other	T2	LIVING	TCGA-A7-A0CH-01	Iq	C3-BRCA/Luminal	cluster 2	BRCA non-CIMP c9	BRCA nonbasal-like c8	BRCA nonbasal-like c7	miRNA cluster 14	cluster 2	mutation cluster 4	TCGA-A7-A0CH	TCGA Breast Cancer (BRCA)	breast invasive carcinoma	Breast					79	Left Upper Outer Quadrant|Left	Sentinel node biopsy alone
TCGA-A7-A0CH-11		79			232			FEMALE									232	0							followup			LIVING	TCGA-A7-A0CH-11		C3-BRCA/Luminal							mutation cluster 4	TCGA-A7-A0CH	TCGA Breast Cancer (BRCA)	breast invasive carcinoma	Breast					79	Left Upper Outer Quadrant|Left	Sentinel node biopsy alone
TCGA-A7-A0CJ-01	Stage IIA	57	1	Stage IIA	409		Positive	FEMALE	Negative	4	3	4	Negative	M0	Negative	N0	409	0	LumB	Luminal B	Positive	LumA/B	-6	-3	followup	T_Other	T2	LIVING	TCGA-A7-A0CJ-01	High	C3-BRCA/Luminal	cluster 3	BRCA CIMP c7	BRCA nonbasal-like c8	BRCA nonbasal-like c7	miRNA cluster 14	cluster 2	mutation cluster 3	TCGA-A7-A0CJ	TCGA Breast Cancer (BRCA)	breast invasive carcinoma	Breast					57	Left	Sentinel lymph node biopsy plus axillary dissection
TCGA-A7-A0D9-01	Stage IIA	37	4	Stage IIA	272		Positive	FEMALE	Negative	3	3	3	Negative	M0	Negative	N0	272	0	LumA	Luminal A	Negative	ReacII	-3	-3	followup	T_Other	T2	LIVING	TCGA-A7-A0D9-01	BRCA-LUAD+	C3-BRCA/Luminal	cluster 2	BRCA non-CIMP c9	BRCA nonbasal-like c8	BRCA nonbasal-like c7	miRNA cluster 12	cluster 5	mutation cluster 4	TCGA-A7-A0D9	TCGA Breast Cancer (BRCA)	breast invasive carcinoma	Breast					37	Left Upper Outer Quadrant|Left	Axillary lymph node dissection alone
TCGA-A7-A0D9-11		37			272			FEMALE									272	0	Normal						followup			LIVING	TCGA-A7-A0D9-11		C3-BRCA/Luminal							mutation cluster 4	TCGA-A7-A0D9	TCGA Breast Cancer (BRCA)	breast invasive carcinoma	Breast					37	Left Upper Outer Quadrant|Left	Axillary lymph node dissection alone
TCGA-A7-A0DA-01	Stage IIA	62	1	Stage IIA	373		Negative	FEMALE	Negative	2	2	2	Negative	M0	Negative	N0	373	0	Basal	Basal-like	Negative	X	-13	0	followup	T_Other	T2	LIVING	TCGA-A7-A0DA-01	High	C4-BRCA/Basal	cluster 5	BRCA basal-like c8	BRCA basal-like c6	BRCA basal-like c8	miRNA c1uster 9	cluster 4	mutation cluster 13	TCGA-A7-A0DA	TCGA Breast Cancer (BRCA)	breast invasive carcinoma	Breast					62	Left Lower Outer Quadrant	Sentinel lymph node biopsy plus axillary dissection
TCGA-A7-A0DB-01	Stage IIA	56	2	Stage IIA	266		Positive	FEMALE	Negative	3	3	3	Negative	M0	Negative	N0	266	0	LumA	Luminal A	Positive	LumA	-5	-7	followup	T_Other	T2	LIVING	TCGA-A7-A0DB-01	Iq	C3-BRCA/Luminal	cluster 1	BRCA non-CIMP c9	BRCA nonbasal-like c8	BRCA nonbasal-like c7	miRNA cluster 12	cluster 4	mutation cluster 4	TCGA-A7-A0DB	TCGA Breast Cancer (BRCA)	breast invasive carcinoma	Breast					56	Right	Sentinel lymph node biopsy plus axillary dissection
TCGA-A7-A0DB-11		56			266			FEMALE									266	0	Normal						followup			LIVING	TCGA-A7-A0DB-11		C3-BRCA/Luminal							mutation cluster 4	TCGA-A7-A0DB	TCGA Breast Cancer (BRCA)	breast invasive carcinoma	Breast					56	Right	Sentinel lymph node biopsy plus axillary dissection
TCGA-A7-A0DC-01	Stage IA	63		Stage I	386		Positive	FEMALE	Negative				Negative	M0	Negative	N0	386	0	LumA		Negative				followup	T1	T1	LIVING	TCGA-A7-A0DC-01					BRCA nonbasal-like c8					TCGA-A7-A0DC	TCGA Breast Cancer (BRCA)	breast invasive carcinoma	Breast					63	Right Upper Outer Quadrant|Right	Sentinel lymph node biopsy plus axillary dissection
TCGA-A7-A0DC-11		63			386			FEMALE									386	0	Normal						followup			LIVING	TCGA-A7-A0DC-11										TCGA-A7-A0DC	TCGA Breast Cancer (BRCA)	breast invasive carcinoma	Breast					63	Right Upper Outer Quadrant|Right	Sentinel lymph node biopsy plus axillary dissection
TCGA-A7-A13D-01	Stage IIA	46	3	Stage IIA	267		Negative	FEMALE	Negative	2	2	2	Negative	M0	Negative	N0	267	0	Basal	Basal-like	Positive	ReacII	-13	0	followup	T_Other	T2	LIVING	TCGA-A7-A13D-01	High	C4-BRCA/Basal	cluster 5	BRCA basal-like c8	BRCA basal-like c6	BRCA basal-like c8	miRNA cluster 12	cluster 5	mutation cluster 2	TCGA-A7-A13D	TCGA Breast Cancer (BRCA)	breast invasive carcinoma	Breast					46	Right Upper Outer Quadrant	Sentinel node biopsy alone
TCGA-A7-A13E-01	Stage IIB	62	1	No_Conversion	326		Positive	FEMALE	Negative				Negative	M0	Positive	N1	326	0	Basal	Basal-like	Negative	Basal	-13	-12	followup	T_Other	T2	LIVING	TCGA-A7-A13E-01	High	C4-BRCA/Basal	cluster 4	BRCA basal-like c8	BRCA basal-like c6	BRCA basal-like c8	miRNA cluster 12	cluster 5		TCGA-A7-A13E	TCGA Breast Cancer (BRCA)	breast invasive carcinoma	Breast	YES	YES	NO		62	Left Upper Outer Quadrant	Sentinel lymph node biopsy plus axillary dissection
TCGA-A7-A13E-11		62			326			FEMALE									326	0	Normal						followup			LIVING	TCGA-A7-A13E-11		C4-BRCA/Basal								TCGA-A7-A13E	TCGA Breast Cancer (BRCA)	breast invasive carcinoma	Breast	YES	YES	NO		62	Left Upper Outer Quadrant	Sentinel lymph node biopsy plus axillary dissection
TCGA-A7-A13F-01	Stage IIIA	44	3	No_Conversion	387		Positive	FEMALE	Negative	1	3	4	Negative	M0	Positive	N1	387	0	LumB	Luminal B	Positive	LumA/B	0	-3	followup	T_Other	T3	LIVING	TCGA-A7-A13F-01	BRCA-LUAD+	C3-BRCA/Luminal	cluster 4	BRCA CIMP c7	BRCA nonbasal-like c8	BRCA nonbasal-like c7	miRNA cluster 4	cluster 4	mutation c1uster 9	TCGA-A7-A13F	TCGA Breast Cancer (BRCA)	breast invasive carcinoma	Breast					44	Right Upper Outer Quadrant	Sentinel lymph node biopsy plus axillary dissection
TCGA-A7-A13F-11		44			387			FEMALE									387	0	Normal						followup			LIVING	TCGA-A7-A13F-11		C3-BRCA/Luminal							mutation c1uster 9	TCGA-A7-A13F	TCGA Breast Cancer (BRCA)	breast invasive carcinoma	Breast					44	Right Upper Outer Quadrant	Sentinel lymph node biopsy plus axillary dissection
TCGA-A7-A13G-01	Stage IIA	79	2	Stage IIA	348		Positive	FEMALE	Negative				Negative	M0	Negative	N0	348	0	LumA		Positive				followup	T_Other	T2	LIVING	TCGA-A7-A13G-01	Iq		cluster 2	BRCA non-CIMP c9		BRCA nonbasal-like c7	miRNA cluster 14	cluster 3	mutation cluster 4	TCGA-A7-A13G	TCGA Breast Cancer (BRCA)	breast invasive carcinoma	Breast	NO	NO			79	Left	Sentinel node biopsy alone
TCGA-A7-A13G-11		79			348			FEMALE									348	0	LumA						followup			LIVING	TCGA-A7-A13G-11									mutation cluster 4	TCGA-A7-A13G	TCGA Breast Cancer (BRCA)	breast invasive carcinoma	Breast	NO	NO			79	Left	Sentinel node biopsy alone
TCGA-A7-A13H-01																													TCGA-A7-A13H-01	Iq			BRCA non-CIMP c9			miRNA cluster 4			TCGA-A7-A13H	TCGA Breast Cancer (BRCA)	breast invasive carcinoma	Breast	NO	NO			61	Right	Sentinel lymph node biopsy plus axillary dissection
TCGA-A7-A26E-01	Stage IIIA	71	2	Stage IIIA	421		Positive	FEMALE	Negative				Negative	M0	Positive	N1	421	0	LumA		Positive				followup	T_Other	T3	LIVING	TCGA-A7-A26E-01	Squamous	C3-BRCA/Luminal	cluster 4	BRCA CIMP c7	BRCA nonbasal-like c8	BRCA nonbasal-like c7	miRNA c1uster 10	cluster 7	mutation cluster 1	TCGA-A7-A26E	TCGA Breast Cancer (BRCA)	breast invasive carcinoma	Breast					71	Left	Sentinel lymph node biopsy plus axillary dissection
TCGA-A7-A26F-01	Stage IA	55	3	Stage I	257		Negative	FEMALE	Negative				Negative	M0	Negative	N0	257	0	Basal		Negative				enrollment	T1	T1	LIVING	TCGA-A7-A26F-01	BRCA-LUAD+	C4-BRCA/Basal	cluster 4	BRCA CIMP c7	BRCA basal-like c6	BRCA basal-like c8	miRNA cluster 4	cluster 5	mutation cluster 3	TCGA-A7-A26F	TCGA Breast Cancer (BRCA)	breast invasive carcinoma	Breast					55	Left	Sentinel node biopsy alone
TCGA-A7-A26G-01	Stage IIA	50	3	Stage IIA	209		Negative	FEMALE	Negative				Negative	M0	Negative	N0	209	0	Basal		Negative				enrollment	T_Other	T2	LIVING	TCGA-A7-A26G-01	COAD-READ	C4-BRCA/Basal	cluster 5	Low purity c2	KIRC-like c1	BRCA basal-like c8	miRNA cluster 4	cluster 4	mutation cluster 5	TCGA-A7-A26G	TCGA Breast Cancer (BRCA)	breast invasive carcinoma	Breast					50	Right	Sentinel lymph node biopsy plus axillary dissection
TCGA-A7-A26H-01	Stage IIA	72	3	Stage IIA	64		Positive	FEMALE	Positive				Negative	M0	Positive	N1	64	0	LumA		Negative				enrollment	T1	T1	LIVING	TCGA-A7-A26H-01	BRCA-LUAD+	C3-BRCA/Luminal	cluster 4	BRCA CIMP c7	BRCA nonbasal-like c8	BRCA nonbasal-like c7	miRNA cluster 4		mutation cluster 4	TCGA-A7-A26H	TCGA Breast Cancer (BRCA)	breast invasive carcinoma	Breast	YES	NO	NO		72	Left	Sentinel lymph node biopsy plus axillary dissection
TCGA-A7-A26I-01	Stage IIA	65	1	Stage IIA	122		Negative	FEMALE	Negative				Negative	M0	Negative	N0	122	0	Basal		Negative				enrollment	T_Other	T2	LIVING	TCGA-A7-A26I-01	High	C4-BRCA/Basal	cluster 5	BRCA basal-like c8	BRCA basal-like c6	BRCA basal-like c8	miRNA cluster 4		mutation cluster 5	TCGA-A7-A26I	TCGA Breast Cancer (BRCA)	breast invasive carcinoma	Breast					65	Left	Axillary lymph node dissection alone
TCGA-A7-A26J-01	Stage IIA	49	3	Stage IIA	67		Positive	FEMALE	Negative				Negative	M0	Negative	N0	67	0	LumA		Positive				enrollment	T_Other	T2	LIVING	TCGA-A7-A26J-01	High	C3-BRCA/Luminal	cluster 4	BRCA CIMP c7		BRCA nonbasal-like c7	miRNA cluster 13	cluster 6	mutation c1uster 9	TCGA-A7-A26J	TCGA Breast Cancer (BRCA)	breast invasive carcinoma	Breast					49	Left	Sentinel lymph node biopsy plus axillary dissection
TCGA-A7-A2KD-01																			LumB										TCGA-A7-A2KD-01	Squamous	C3-BRCA/Luminal		BRCA non-CIMP c9	BRCA basal-like c6	BRCA nonbasal-like c7	miRNA cluster 4			TCGA-A7-A2KD	TCGA Breast Cancer (BRCA)	breast invasive carcinoma	Breast					53	Right	No axillary staging
TCGA-A7-A3IY-01																			LumA										TCGA-A7-A3IY-01	Kirc+			BRCA non-CIMP c9		BRCA nonbasal-like c7	miRNA cluster 4			TCGA-A7-A3IY	TCGA Breast Cancer (BRCA)	breast invasive carcinoma	Breast					71	Right Upper Outer Quadrant	Sentinel node biopsy alone
TCGA-A7-A3IZ-01																			LumA										TCGA-A7-A3IZ-01	Kirc+	C3-BRCA/Luminal		BRCA CIMP c7	BRCA nonbasal-like c8	BRCA nonbasal-like c7	miRNA cluster 14			TCGA-A7-A3IZ	TCGA Breast Cancer (BRCA)	breast invasive carcinoma	Breast					62	Right	Sentinel lymph node biopsy plus axillary dissection
TCGA-A7-A3J0-01																			LumA										TCGA-A7-A3J0-01	BRCA-LUAD+	C3-BRCA/Luminal		Low purity c2	BRCA nonbasal-like c8	BRCA nonbasal-like c7	miRNA cluster 6			TCGA-A7-A3J0	TCGA Breast Cancer (BRCA)	breast invasive carcinoma	Breast					62	Right	Sentinel node biopsy alone
TCGA-A7-A3J1-01																			LumA										TCGA-A7-A3J1-01	Iq	C3-BRCA/Luminal		BRCA non-CIMP c9	BRCA nonbasal-like c8	BRCA nonbasal-like c7	miRNA cluster 4			TCGA-A7-A3J1	TCGA Breast Cancer (BRCA)	breast invasive carcinoma	Breast					63	Left	Sentinel lymph node biopsy plus axillary dissection
TCGA-A7-A3RF-01																													TCGA-A7-A3RF-01	Quiet			BRCA non-CIMP c9	BRCA nonbasal-like c8		miRNA c1uster 10			TCGA-A7-A3RF	TCGA Breast Cancer (BRCA)	breast invasive carcinoma	Breast	NO	NO			79	Left Upper Outer Quadrant	Sentinel node biopsy alone
TCGA-A7-A425-01																													TCGA-A7-A425-01										TCGA-A7-A425	TCGA Breast Cancer (BRCA)	breast invasive carcinoma	Breast					70	Right	Sentinel lymph node biopsy plus axillary dissection
TCGA-A7-A426-01																													TCGA-A7-A426-01										TCGA-A7-A426	TCGA Breast Cancer (BRCA)	breast invasive carcinoma	Breast					50	Right	Sentinel lymph node biopsy plus axillary dissection
TCGA-A7-A4SA-01																													TCGA-A7-A4SA-01										TCGA-A7-A4SA	TCGA Breast Cancer (BRCA)	breast invasive carcinoma	Breast					40	Left Lower Outer Quadrant	Sentinel lymph node biopsy plus axillary dissection
TCGA-A7-A4SA-11																													TCGA-A7-A4SA-11										TCGA-A7-A4SA	TCGA Breast Cancer (BRCA)	breast invasive carcinoma	Breast					40	Left Lower Outer Quadrant	Sentinel lymph node biopsy plus axillary dissection
TCGA-A7-A4SB-01																													TCGA-A7-A4SB-01										TCGA-A7-A4SB	TCGA Breast Cancer (BRCA)	breast invasive carcinoma	Breast					56	Right Upper Outer Quadrant	Sentinel node biopsy alone
TCGA-A7-A4SC-01																													TCGA-A7-A4SC-01										TCGA-A7-A4SC	TCGA Breast Cancer (BRCA)	breast invasive carcinoma	Breast					62	Right Upper Outer Quadrant
TCGA-A7-A4SC-11																													TCGA-A7-A4SC-11										TCGA-A7-A4SC	TCGA Breast Cancer (BRCA)	breast invasive carcinoma	Breast					62	Right Upper Outer Quadrant
TCGA-A7-A4SD-01																													TCGA-A7-A4SD-01										TCGA-A7-A4SD	TCGA Breast Cancer (BRCA)	breast invasive carcinoma	Breast					52	Right	Sentinel node biopsy alone
TCGA-A7-A4SD-11																													TCGA-A7-A4SD-11										TCGA-A7-A4SD	TCGA Breast Cancer (BRCA)	breast invasive carcinoma	Breast					52	Right	Sentinel node biopsy alone
TCGA-A7-A4SE-01																													TCGA-A7-A4SE-01										TCGA-A7-A4SE	TCGA Breast Cancer (BRCA)	breast invasive carcinoma	Breast					54	Left	Sentinel node biopsy alone
TCGA-A7-A4SE-11																													TCGA-A7-A4SE-11										TCGA-A7-A4SE	TCGA Breast Cancer (BRCA)	breast invasive carcinoma	Breast					54	Left	Sentinel node biopsy alone
TCGA-A7-A4SF-01																													TCGA-A7-A4SF-01										TCGA-A7-A4SF	TCGA Breast Cancer (BRCA)	breast invasive carcinoma	Breast					54	Right	Sentinel node biopsy alone
TCGA-A7-A56D-01																													TCGA-A7-A56D-01										TCGA-A7-A56D	TCGA Breast Cancer (BRCA)	breast invasive carcinoma	Breast					84	Left Lower Inner Quadrant	Sentinel lymph node biopsy plus axillary dissection
TCGA-A7-A5ZV-01																													TCGA-A7-A5ZV-01										TCGA-A7-A5ZV	TCGA Breast Cancer (BRCA)	breast invasive carcinoma	Breast					62	Left	Sentinel node biopsy alone
TCGA-A7-A5ZW-01																													TCGA-A7-A5ZW-01										TCGA-A7-A5ZW	TCGA Breast Cancer (BRCA)	breast invasive carcinoma	Breast					47	Right Upper Outer Quadrant	Sentinel node biopsy alone
TCGA-A7-A5ZX-01																													TCGA-A7-A5ZX-01										TCGA-A7-A5ZX	TCGA Breast Cancer (BRCA)	breast invasive carcinoma	Breast					48	Left	Sentinel lymph node biopsy plus axillary dissection
TCGA-A7-A6VV-01																													TCGA-A7-A6VV-01										TCGA-A7-A6VV	TCGA Breast Cancer (BRCA)	breast invasive carcinoma	Breast					51	Right	Sentinel lymph node biopsy plus axillary dissection
TCGA-A7-A6VW-01																													TCGA-A7-A6VW-01										TCGA-A7-A6VW	TCGA Breast Cancer (BRCA)	breast invasive carcinoma	Breast					48	Left	Sentinel node biopsy alone
TCGA-A7-A6VX-01																													TCGA-A7-A6VX-01										TCGA-A7-A6VX	TCGA Breast Cancer (BRCA)	breast invasive carcinoma	Breast					68	Left|Left Upper Outer Quadrant	Sentinel node biopsy alone
TCGA-A7-A6VY-01																													TCGA-A7-A6VY-01										TCGA-A7-A6VY	TCGA Breast Cancer (BRCA)	breast invasive carcinoma	Breast					48	Right|Right Upper Outer Quadrant	Sentinel lymph node biopsy plus axillary dissection
TCGA-A8-A06N-01	Stage IIIB	66	3	Stage IIIB	0		Positive	FEMALE	Negative	1	3	4	Negative	M0	Negative	N0	0	0	LumB	Luminal B	Negative	LumA/B	-10	-3	enrollment	T_Other	T4	LIVING	TCGA-A8-A06N-01	Squamous	C3-BRCA/Luminal	cluster 4	BRCA CIMP c7	BRCA nonbasal-like c8	BRCA nonbasal-like c7	miRNA cluster 14	cluster 2	mutation c1uster 9	TCGA-A8-A06N	TCGA Breast Cancer (BRCA)	breast invasive carcinoma	Breast					66	Left
TCGA-A8-A06O-01	Stage I	60	5	Stage I	396		Positive	FEMALE	Negative				Negative	M0	Negative	N0	396	0	LumB	Luminal B	Positive		-2	-3	enrollment	T1	T1	LIVING	TCGA-A8-A06O-01	BRCA-LUAD+	C3-BRCA/Luminal	cluster 4	BRCA CIMP c7		BRCA nonbasal-like c7	miRNA cluster 4	cluster 4	mutation cluster 5	TCGA-A8-A06O	TCGA Breast Cancer (BRCA)	breast invasive carcinoma	Breast					60	Left
TCGA-A8-A06P-01	Stage IIIA	63	4	Stage IIIA	396		Positive	FEMALE	Negative	3	3	3	Negative	M0	Positive	N2	396	0	LumA	Luminal A	Positive	ReacI	-5	-3	enrollment	T1	T1	LIVING	TCGA-A8-A06P-01	Kirc+	C3-BRCA/Luminal	cluster 2	BRCA non-CIMP c9	BRCA nonbasal-like c8	BRCA nonbasal-like c7	miRNA cluster 4	cluster 4	mutation cluster 4	TCGA-A8-A06P	TCGA Breast Cancer (BRCA)	breast invasive carcinoma	Breast					63	Right
TCGA-A8-A06Q-01	Stage IIIA	63	3	No_Conversion	31		Positive	FEMALE	Negative				Negative	M0	Positive	N2	31	0	LumB	Luminal B	Positive		-2	-3	enrollment	T_Other	T3	LIVING	TCGA-A8-A06Q-01	High	C3-BRCA/Luminal	cluster 4	BRCA CIMP c7		BRCA nonbasal-like c7	miRNA cluster 7	cluster 7	mutation cluster 3	TCGA-A8-A06Q	TCGA Breast Cancer (BRCA)	breast invasive carcinoma	Breast					63	Left Upper Outer Quadrant
TCGA-A8-A06R-01	Stage IIB	69		No_Conversion	546		Positive	FEMALE	Equivocal				Negative	M0	Positive	N1	546	0	LumB	Luminal B	Negative	ReacI	-2	-5	enrollment	T_Other	T2	LIVING	TCGA-A8-A06R-01	High	C3-BRCA/Luminal	cluster 4	BRCA CIMP c7	BRCA nonbasal-like c8	BRCA nonbasal-like c7	miRNA cluster 4	cluster 4	mutation cluster 4	TCGA-A8-A06R	TCGA Breast Cancer (BRCA)	breast invasive carcinoma	Breast					69	Right Upper Outer Quadrant
TCGA-A8-A06T-01	Stage IIIA	75	4	Stage IIIA	1249		Positive	FEMALE	Negative				Negative	M0	Positive	N1	1249	0	LumA	Luminal A	Positive		-10	-3	enrollment	T_Other	T3	LIVING	TCGA-A8-A06T-01	Squamous	C3-BRCA/Luminal	cluster 4	BRCA CIMP c7		BRCA nonbasal-like c7	miRNA cluster 14	cluster 2	mutation cluster 14	TCGA-A8-A06T	TCGA Breast Cancer (BRCA)	breast invasive carcinoma	Breast					75	Left Upper Outer Quadrant
TCGA-A8-A06U-01	Stage IIB	80		Stage IIB	882	882	Positive	FEMALE	Equivocal				Negative	M0	Positive	N1	882	1	LumA	Luminal A	Positive	LumA/B	-2	-5	enrollment	T_Other	T2	DECEASED	TCGA-A8-A06U-01	High	C3-BRCA/Luminal	cluster 4	BRCA CIMP c7	BRCA nonbasal-like c8	BRCA nonbasal-like c7	miRNA cluster 4	cluster 4	mutation cluster 4	TCGA-A8-A06U	TCGA Breast Cancer (BRCA)	breast invasive carcinoma	Breast					80	Right Upper Outer Quadrant
TCGA-A8-A06X-01	Stage IIB	77	1	Stage IIB	943	943	Positive	FEMALE	Positive				Negative	M0	Negative	N0	943	1	LumB	Luminal B	Negative	LumA/B	-2	-5	enrollment	T_Other	T3	DECEASED	TCGA-A8-A06X-01	High	C3-BRCA/Luminal	cluster 3	BRCA CIMP c7	BRCA nonbasal-like c8	BRCA nonbasal-like c7			mutation c1uster 10	TCGA-A8-A06X	TCGA Breast Cancer (BRCA)	breast invasive carcinoma	Breast					77	Right Upper Outer Quadrant
TCGA-A8-A06Y-01	Stage IIA	66	4	Stage IIA	791		Positive	FEMALE	Negative	1	3	3	Negative	M0	Negative	N0	791	0	LumA	Luminal A	Positive	LumA	0	-3	enrollment	T_Other	T2	LIVING	TCGA-A8-A06Y-01	BRCA-LUAD+	C3-BRCA/Luminal	cluster 4	BRCA CIMP c7	BRCA nonbasal-like c8	BRCA nonbasal-like c7	miRNA cluster 14	cluster 2	mutation c1uster 9	TCGA-A8-A06Y	TCGA Breast Cancer (BRCA)	breast invasive carcinoma	Breast					66	Left Upper Outer Quadrant
TCGA-A8-A06Z-01	Stage IIB	84	5	Stage IIB	31		Positive	FEMALE	Negative	1	3	4	Negative	M0	Negative	N0	31	0	LumB	Luminal B	Positive	Her2	-10	-3	enrollment	T_Other	T3	LIVING	TCGA-A8-A06Z-01	BRCA-LUAD+	C3-BRCA/Luminal	cluster 5	Cluster 5	BRCA nonbasal-like c8	BRCA nonbasal-like c7	miRNA cluster 6	cluster 1	mutation c1uster 9	TCGA-A8-A06Z	TCGA Breast Cancer (BRCA)	breast invasive carcinoma	Breast					84	Right Upper Outer Quadrant
TCGA-A8-A075-01	Stage IIB	42	2	Stage IIB	517		Positive	FEMALE	Negative	5	2	1	Negative	M0	Positive	N1	517	0	LumB	HER2-enriched	Positive	X	-2	-5	enrollment	T_Other	T2	LIVING	TCGA-A8-A075-01	BRCA-LUAD+	C3-BRCA/Luminal	cluster 5	BRCA non-CIMP c9	BRCA nonbasal-like c8	BRCA nonbasal-like c7	miRNA cluster 6	cluster 1	mutation cluster 3	TCGA-A8-A075	TCGA Breast Cancer (BRCA)	breast invasive carcinoma	Breast					42	Left Upper Outer Quadrant
TCGA-A8-A076-01	Stage IIA	66	4	Stage IIA	1641		Positive	FEMALE	Positive	1	1	1	Negative	M0	Negative	N0	1641	0	LumB	HER2-enriched	Positive	Her2	-2	-5	enrollment	T_Other	T2	LIVING	TCGA-A8-A076-01	High	C3-BRCA/Luminal	cluster 3	BRCA CIMP c7	BRCA basal-like c6	BRCA nonbasal-like c7	miRNA cluster 6	cluster 4	mutation c1uster 9	TCGA-A8-A076	TCGA Breast Cancer (BRCA)	breast invasive carcinoma	Breast					66	Left Upper Outer Quadrant
TCGA-A8-A079-01	Stage IIIB	69	5	Stage IIIC	274		Positive	FEMALE	Negative	4	3	4	Negative	M0	Positive	N3	274	0	LumB	Luminal B	Positive	LumA/B	-6	-3	enrollment	T_Other	T4	LIVING	TCGA-A8-A079-01	Kirc+	C3-BRCA/Luminal	cluster 3	BRCA CIMP c7	BRCA nonbasal-like c8	BRCA nonbasal-like c7	miRNA cluster 4	cluster 5	mutation cluster 5	TCGA-A8-A079	TCGA Breast Cancer (BRCA)	breast invasive carcinoma	Breast					69	Left Upper Outer Quadrant
TCGA-A8-A07B-01	Stage IIA	69	5	Stage IIA	1004		Positive	FEMALE	Positive				Negative	M0	Negative	N0	1004	0	LumA	HER2-enriched	Positive		-1	-3	enrollment	T_Other	T2	LIVING	TCGA-A8-A07B-01	High	C3-BRCA/Luminal	cluster 3	BRCA CIMP c7		BRCA nonbasal-like c7	miRNA cluster 14	cluster 2	mutation cluster 2	TCGA-A8-A07B	TCGA Breast Cancer (BRCA)	breast invasive carcinoma	Breast					69	Left Lower Outer Quadrant
TCGA-A8-A07C-01	Stage IIA	57	2	Stage IIA	580		Negative	FEMALE	Negative				Negative	M0	Negative	N0	580	0	Basal	Basal-like	Negative		-13	-12	enrollment	T_Other	T2	LIVING	TCGA-A8-A07C-01	High	C4-BRCA/Basal	cluster 5	BRCA basal-like c8		BRCA basal-like c8	miRNA cluster 4	cluster 5	mutation cluster 14	TCGA-A8-A07C	TCGA Breast Cancer (BRCA)	breast invasive carcinoma	Breast					57	Right Upper Outer Quadrant
TCGA-A8-A07E-01	Stage X	81	2	Stage IIIC	608		Positive	FEMALE	Negative	1	3	3	Negative	M0	Positive	N3	608	0	LumA	Luminal A	Positive	ReacII	-4	-3	enrollment	T_Other	T4	LIVING	TCGA-A8-A07E-01	Squamous	C3-BRCA/Luminal	cluster 4	BRCA non-CIMP c9	KIRC-like c1	BRCA nonbasal-like c7	miRNA cluster 6	cluster 1	mutation cluster 4	TCGA-A8-A07E	TCGA Breast Cancer (BRCA)	breast invasive carcinoma	Breast					81	Left Upper Outer Quadrant
TCGA-A8-A07F-01	Stage IIB	65	2	Stage IIB	576		Positive	FEMALE	Negative	1	4	3	Negative	M0	Positive	N1	576	0	LumA	Luminal A	Positive	ReacI	-1	-1	enrollment	T_Other	T2	LIVING	TCGA-A8-A07F-01	BRCA-LUAD+	C3-BRCA/Luminal	cluster 4	BRCA CIMP c7	BRCA nonbasal-like c8	BRCA nonbasal-like c7	miRNA cluster 12	cluster 4	mutation c1uster 9	TCGA-A8-A07F	TCGA Breast Cancer (BRCA)	breast invasive carcinoma	Breast					65	Left Upper Outer Quadrant
TCGA-A8-A07G-01	Stage IIA	65	3	Stage IIA	576		Positive	FEMALE	Negative				Negative	M0	Positive	N1	576	0	LumA	Luminal A	Positive		-5	-7	enrollment	T1	T1	LIVING	TCGA-A8-A07G-01	High	C3-BRCA/Luminal	cluster 1	BRCA non-CIMP c9		BRCA nonbasal-like c7	miRNA cluster 4	cluster 4	mutation cluster 4	TCGA-A8-A07G	TCGA Breast Cancer (BRCA)	breast invasive carcinoma	Breast					65	Right Upper Outer Quadrant
TCGA-A8-A07I-01	Stage IIIA	69	3	Stage IIIA	426		Positive	FEMALE	Positive	1	1	1	Negative	M0	Positive	N2	426	0	Her2	HER2-enriched	Negative	Her2	-2	-5	enrollment	T_Other	T2	LIVING	TCGA-A8-A07I-01	High	C3-BRCA/Luminal	cluster 3	BRCA CIMP c7	BRCA basal-like c6	BRCA nonbasal-like c7	miRNA cluster 4	cluster 4	mutation c1uster 9	TCGA-A8-A07I	TCGA Breast Cancer (BRCA)	breast invasive carcinoma	Breast					69	Left Upper Outer Quadrant
TCGA-A8-A07J-01	Stage IIB	35	2	Stage IIB	365		Positive	FEMALE	Negative				Negative	M0	Positive	N1	365	0	LumA	Luminal A	Positive		-5	-7	enrollment	T_Other	T2	LIVING	TCGA-A8-A07J-01	Kirc+	C3-BRCA/Luminal	cluster 1	BRCA non-CIMP c9		BRCA nonbasal-like c7	miRNA cluster 4	cluster 4	mutation cluster 4	TCGA-A8-A07J	TCGA Breast Cancer (BRCA)	breast invasive carcinoma	Breast					35	Right Upper Outer Quadrant
TCGA-A8-A07L-01	Stage IIIA	58	4	Stage IIIA	517		Positive	FEMALE	Negative				Negative	M0	Positive	N1	517	0	LumB	Luminal B	Positive		-10	-3	enrollment	T_Other	T3	LIVING	TCGA-A8-A07L-01	High	C3-BRCA/Luminal	cluster 4	BRCA CIMP c7		BRCA nonbasal-like c7	miRNA cluster 4	cluster 5	mutation cluster 12	TCGA-A8-A07L	TCGA Breast Cancer (BRCA)	breast invasive carcinoma	Breast					58	Right Upper Outer Quadrant
TCGA-A8-A07O-01	Stage IIA	51	1	Stage IIA	304		Negative	FEMALE	Negative	2	2	2	Negative	M0	Negative	N0	304	0	Basal	Basal-like	Negative	Basal	-13	-12	enrollment	T_Other	T2	LIVING	TCGA-A8-A07O-01	BRCA-LUAD+	C4-BRCA/Basal	cluster 5	BRCA basal-like c8	BRCA basal-like c6	BRCA basal-like c8	miRNA cluster 4	cluster 4	mutation cluster 5	TCGA-A8-A07O	TCGA Breast Cancer (BRCA)	breast invasive carcinoma	Breast					51	Right Upper Outer Quadrant
TCGA-A8-A07P-01	Stage IIB	68	4	Stage IIB	334		Positive	FEMALE	Positive	4	3	3	Negative	M0	Positive	N1	334	0	LumA	Luminal A	Positive	LumA/B	-10	-3	enrollment	T_Other	T2	LIVING	TCGA-A8-A07P-01	Squamous	C3-BRCA/Luminal	cluster 3	BRCA CIMP c7	BRCA nonbasal-like c8	BRCA nonbasal-like c7	miRNA cluster 14	cluster 2	mutation c1uster 9	TCGA-A8-A07P	TCGA Breast Cancer (BRCA)	breast invasive carcinoma	Breast					68	Left Upper Outer Quadrant
TCGA-A8-A07R-01	Stage IIIC	80	3	Stage IIIC	273		Negative	FEMALE	Equivocal	2	2	2	Negative	M0	Positive	N3	273	0	Basal	Basal-like	Negative	Basal	-13	-12	enrollment	T_Other	T2	LIVING	TCGA-A8-A07R-01	High	C4-BRCA/Basal	cluster 5	BRCA basal-like c8	BRCA basal-like c6	BRCA basal-like c8	miRNA cluster 4	cluster 4	mutation cluster 5	TCGA-A8-A07R	TCGA Breast Cancer (BRCA)	breast invasive carcinoma	Breast					80	Left Upper Outer Quadrant
TCGA-A8-A07S-01	Stage IIA	73	2	Stage IIA	242		Positive	FEMALE	Negative				Negative	M0	Negative	N0	242	0	LumB	Luminal B	Negative	LumA	-12	-3	enrollment	T_Other	T2	LIVING	TCGA-A8-A07S-01	Iq	C3-BRCA/Luminal	cluster 2	BRCA non-CIMP c9	BRCA nonbasal-like c8	BRCA nonbasal-like c7	miRNA c1uster 10	cluster 7		TCGA-A8-A07S	TCGA Breast Cancer (BRCA)	breast invasive carcinoma	Breast					73	Left Upper Outer Quadrant
TCGA-A8-A07U-01	Stage IIIA	66	3	Stage IIIA	303		Negative	FEMALE	Negative				Negative	M0	Positive	N2	303	0	Basal	Basal-like	Positive		-13	-12	enrollment	T_Other	T2	LIVING	TCGA-A8-A07U-01	High	C4-BRCA/Basal	cluster 5	BRCA basal-like c8		BRCA basal-like c8	miRNA cluster 7	cluster 4	mutation cluster 5	TCGA-A8-A07U	TCGA Breast Cancer (BRCA)	breast invasive carcinoma	Breast					66	Right Upper Outer Quadrant
TCGA-A8-A07W-01	Stage IV	76	3	Stage IV	304		Positive	FEMALE	Negative	1	1	4	Positive	M1	Negative	N0	304	0	LumB	Luminal B	Positive	LumA/B	-2	-5	enrollment	T_Other	T2	LIVING	TCGA-A8-A07W-01	High	C3-BRCA/Luminal	cluster 4	BRCA CIMP c7	BRCA nonbasal-like c8	BRCA nonbasal-like c7	miRNA cluster 4	cluster 4	mutation cluster 5	TCGA-A8-A07W	TCGA Breast Cancer (BRCA)	breast invasive carcinoma	Breast					76	Left Upper Outer Quadrant
TCGA-A8-A07Z-01	Stage IIA	85	3	Stage IIA	853		Positive	FEMALE	Negative	3	3	4	Negative	M0	Negative	N0	853	0		Luminal B	Positive	LumA	-12	-3	enrollment	T_Other	T2	LIVING	TCGA-A8-A07Z-01	High	C3-BRCA/Luminal	cluster 2	BRCA non-CIMP c9	BRCA nonbasal-like c8		miRNA cluster 14	cluster 2	mutation cluster 4	TCGA-A8-A07Z	TCGA Breast Cancer (BRCA)	breast invasive carcinoma	Breast					85	Left
TCGA-A8-A081-01	Stage IIA	80	5	Stage IIA	0		Positive	FEMALE	Negative	1	1	1	Negative	M0	Negative	N0	0	0	LumB	HER2-enriched	Positive	Her2	-2	-5	enrollment	T_Other	T2	LIVING	TCGA-A8-A081-01	High	C3-BRCA/Luminal	cluster 4	BRCA CIMP c7	BRCA nonbasal-like c8	BRCA nonbasal-like c7	miRNA cluster 7	cluster 3	mutation cluster 3	TCGA-A8-A081	TCGA Breast Cancer (BRCA)	breast invasive carcinoma	Breast					80	Right
TCGA-A8-A082-01	Stage IIB	58	4	Stage IIB	549		Positive	FEMALE	Negative	1	3	4	Negative	M0	Positive	N1	549	0	LumB	Luminal B	Positive	LumA	-9	-3	enrollment	T_Other	T2	LIVING	TCGA-A8-A082-01	Kirc+	C3-BRCA/Luminal	cluster 4	BRCA CIMP c7	BRCA nonbasal-like c8	BRCA nonbasal-like c7	miRNA cluster 4	cluster 5	mutation c1uster 9	TCGA-A8-A082	TCGA Breast Cancer (BRCA)	breast invasive carcinoma	Breast					58	Right
TCGA-A8-A083-01	Stage IIB	67	2	Stage IIB	0		Positive	FEMALE	Negative	3	3	3	Negative	M0	Negative	N0	0	0	LumA	Luminal A	Positive	LumA	-12	-3	enrollment	T_Other	T3	LIVING	TCGA-A8-A083-01	Iq	C3-BRCA/Luminal	cluster 2	BRCA non-CIMP c9	BRCA nonbasal-like c8	BRCA nonbasal-like c7	miRNA cluster 14	cluster 2	mutation c1uster 9	TCGA-A8-A083	TCGA Breast Cancer (BRCA)	breast invasive carcinoma	Breast					67	Left
TCGA-A8-A084-01	Stage IIB	81	1	No_Conversion	458		Positive	FEMALE	Negative	2	2	2	Negative	M0	Positive	N1	458	0	LumB	Luminal B	Negative	X	-1	-5	enrollment	T_Other	T2	LIVING	TCGA-A8-A084-01	BRCA-LUAD+	C3-BRCA/Luminal	cluster 3	BRCA CIMP c7	BRCA nonbasal-like c8	BRCA nonbasal-like c7	miRNA cluster 7	cluster 3	mutation cluster 3	TCGA-A8-A084	TCGA Breast Cancer (BRCA)	breast invasive carcinoma	Breast					81	Left
TCGA-A8-A085-01	Stage IIB	44	5	Stage IIB	1124		Positive	MALE	Negative	1	3	4	Negative	M0	Positive	N1	1124	0	LumB	Luminal B	Positive	LumA/B	-10	-3	enrollment	T_Other	T2	LIVING	TCGA-A8-A085-01	High	C3-BRCA/Luminal	cluster 4	BRCA CIMP c7	BRCA nonbasal-like c8	BRCA nonbasal-like c7	miRNA cluster 14	cluster 2	mutation c1uster 9	TCGA-A8-A085	TCGA Breast Cancer (BRCA)	breast invasive carcinoma	Breast					44	Left
TCGA-A8-A086-01	Stage IIA	59	5	Stage IIA	396		Positive	FEMALE	Negative	2	3	3	Negative	M0	Positive	N1	396	0	LumA	Luminal A	Positive	LumA	-9	-3	enrollment	T1	T1	LIVING	TCGA-A8-A086-01	Squamous	C3-BRCA/Luminal	cluster 2	BRCA non-CIMP c9	BRCA nonbasal-like c8	BRCA nonbasal-like c7	miRNA cluster 4	cluster 5	mutation c1uster 9	TCGA-A8-A086	TCGA Breast Cancer (BRCA)	breast invasive carcinoma	Breast					59	Right
TCGA-A8-A08A-01	Stage I	89	2	Stage I	30		Positive	FEMALE	Negative	3	3	3	Negative	M0	Negative	N0	30	0		Luminal A	Positive	LumA	-12	-3	enrollment	T1	T1	LIVING	TCGA-A8-A08A-01	Iq	C3-BRCA/Luminal	cluster 2	BRCA non-CIMP c9	BRCA nonbasal-like c8		miRNA cluster 14	cluster 2	mutation c1uster 9	TCGA-A8-A08A	TCGA Breast Cancer (BRCA)	breast invasive carcinoma	Breast					89	Left Upper Inner Quadrant
TCGA-A8-A08B-01	Stage IIA	52	3	Stage IIA	702		Positive	FEMALE	Positive				Negative	M0	Negative	N0	702	0	Her2	HER2-enriched	Negative		-1	-5	enrollment	T_Other	T2	LIVING	TCGA-A8-A08B-01	High	C3-BRCA/Luminal	cluster 1	BRCA non-CIMP c9		BRCA nonbasal-like c7	miRNA cluster 14	cluster 7	mutation cluster 4	TCGA-A8-A08B	TCGA Breast Cancer (BRCA)	breast invasive carcinoma	Breast					52	Right Upper Inner Quadrant
TCGA-A8-A08C-01	Stage IIA	65	2	Stage IIA	607		Positive	FEMALE	Negative				Negative	M0	Negative	N0	607	0	LumA	Luminal A	Positive		-12	-3	enrollment	T_Other	T2	LIVING	TCGA-A8-A08C-01	BRCA-LUAD+		cluster 2	BRCA non-CIMP c9		BRCA nonbasal-like c7				TCGA-A8-A08C	TCGA Breast Cancer (BRCA)	breast invasive carcinoma	Breast					65	Left Upper Inner Quadrant
TCGA-A8-A08F-01	Stage IIIC	59	4	Stage IIIC	549		Positive	FEMALE	Negative				Negative	M0	Positive	N3	549	0	LumB	Luminal B	Positive		-2	-3	enrollment	T_Other	T2	LIVING	TCGA-A8-A08F-01	High	C3-BRCA/Luminal	cluster 2	BRCA non-CIMP c9		BRCA nonbasal-like c7			mutation c1uster 9	TCGA-A8-A08F	TCGA Breast Cancer (BRCA)	breast invasive carcinoma	Breast					59	Right Upper Inner Quadrant
TCGA-A8-A08G-01	Stage IIA	41	3	Stage IIA	606		Positive	FEMALE	Positive	3	3	4	Negative	M0	Negative	N0	606	0	LumB	Luminal B	Positive	LumA/B	-10	-3	enrollment	T_Other	T2	LIVING	TCGA-A8-A08G-01	High	C3-BRCA/Luminal	cluster 2	BRCA non-CIMP c9	BRCA nonbasal-like c8	BRCA nonbasal-like c7	miRNA cluster 4	cluster 4	mutation c1uster 9	TCGA-A8-A08G	TCGA Breast Cancer (BRCA)	breast invasive carcinoma	Breast					41	Left Upper Inner Quadrant
TCGA-A8-A08H-01	Stage IIA	66	1	Stage IIA	0		Positive	FEMALE	Positive	1	4	3	Negative	M0	Negative	N0	0	0	Normal	Basal-like	Positive	ReacI	-5	-8	enrollment	T_Other	T2	LIVING	TCGA-A8-A08H-01	Quiet	C3-BRCA/Luminal	cluster 1	BRCA non-CIMP c9	BRCA nonbasal-like c8	BRCA nonbasal-like c7	miRNA cluster 4	cluster 4	mutation c1uster 9	TCGA-A8-A08H	TCGA Breast Cancer (BRCA)	breast invasive carcinoma	Breast					66	Left Upper Inner Quadrant
TCGA-A8-A08I-01	Stage IIA	53	4	Stage IIA	365		Positive	FEMALE	Negative				Negative	M0	Negative	N0	365	0	LumB	Luminal B	Positive		-2	-5	enrollment	T_Other	T2	LIVING	TCGA-A8-A08I-01	High	C3-BRCA/Luminal	cluster 2	BRCA non-CIMP c9		BRCA nonbasal-like c7	miRNA cluster 7	cluster 3	mutation cluster 5	TCGA-A8-A08I	TCGA Breast Cancer (BRCA)	breast invasive carcinoma	Breast					53	Right Upper Inner Quadrant
TCGA-A8-A08J-01	Stage IV	52	5	Stage IV	1127	1127	Positive	FEMALE	Negative	1	1	1	Positive	M1	Positive	N3	1127	1	Her2	HER2-enriched	Negative	Her2	-2	-5	enrollment	T_Other	T4	DECEASED	TCGA-A8-A08J-01	High	C3-BRCA/Luminal	cluster 4	BRCA CIMP c7	BRCA basal-like c6	BRCA nonbasal-like c7	miRNA cluster 4	cluster 4	mutation cluster 12	TCGA-A8-A08J	TCGA Breast Cancer (BRCA)	breast invasive carcinoma	Breast					52	Right
TCGA-A8-A08L-01	Stage IIIA	89	1	Stage IIIA	304	304	Positive	FEMALE	Negative	5	2	1	Negative	M0	Positive	N2	304	1	Her2	HER2-enriched	Negative	X	-2	-6	enrollment	T_Other	T3	DECEASED	TCGA-A8-A08L-01	High	C3-BRCA/Luminal	cluster 4	BRCA non-CIMP c9	BRCA basal-like c6	BRCA nonbasal-like c7	miRNA cluster 6	cluster 1	mutation cluster 1	TCGA-A8-A08L	TCGA Breast Cancer (BRCA)	breast invasive carcinoma	Breast					89	Left
TCGA-A8-A08O-01	Stage IV	45	2	Stage IV	942		Positive	FEMALE	Negative	3	4	3	Positive	M1	Positive	N3	942	0	LumA	Luminal A	Positive	ReacI	-5	-7	enrollment	T_Other	T2	LIVING	TCGA-A8-A08O-01	COAD-READ	C3-BRCA/Luminal	cluster 2	BRCA non-CIMP c9	BRCA nonbasal-like c8	BRCA nonbasal-like c7	miRNA cluster 3	cluster 6	mutation cluster 4	TCGA-A8-A08O	TCGA Breast Cancer (BRCA)	breast invasive carcinoma	Breast					45	Right
TCGA-A8-A08P-01	Stage IIIA	70	3	Stage IIIA	942		Positive	FEMALE	Positive				Negative	M0	Positive	N2	942	0	LumB	Luminal B	Positive	ReacII	-2	-5	enrollment	T_Other	T2	LIVING	TCGA-A8-A08P-01	High	C3-BRCA/Luminal	cluster 4	BRCA CIMP c7	BRCA nonbasal-like c8	BRCA nonbasal-like c7			mutation cluster 3	TCGA-A8-A08P	TCGA Breast Cancer (BRCA)	breast invasive carcinoma	Breast					70	Right
TCGA-A8-A08R-01	Stage IIB	52	4	Stage IIB	30		Negative	FEMALE	Negative				Negative	M0	Positive	N1	30	0	Basal	Basal-like	Negative		-13	-12	enrollment	T_Other	T2	LIVING	TCGA-A8-A08R-01	High	C4-BRCA/Basal	cluster 5	BRCA basal-like c8		BRCA basal-like c8	miRNA cluster 4	cluster 4	mutation cluster 3	TCGA-A8-A08R	TCGA Breast Cancer (BRCA)	breast invasive carcinoma	Breast					52	Left
TCGA-A8-A08S-01	Stage IIA	71		Stage IIA	580		Positive	FEMALE	Positive				Negative	M0	Positive	N1	580	0	LumB		Positive				enrollment	T1	T1	LIVING	TCGA-A8-A08S-01	Squamous	C3-BRCA/Luminal		BRCA CIMP c7		BRCA nonbasal-like c7	miRNA cluster 4		mutation cluster 4	TCGA-A8-A08S	TCGA Breast Cancer (BRCA)	breast invasive carcinoma	Breast					71	Left
TCGA-A8-A08T-01	Stage IV	64	4	Stage IV	2830		Positive	FEMALE	Negative	1	3	3	Positive	M1	Positive	N1	2830	0	LumA	Luminal A	Positive	LumA	-5	-3	enrollment	T_Other	T2	LIVING	TCGA-A8-A08T-01	BRCA-LUAD+	C3-BRCA/Luminal	cluster 4	BRCA CIMP c7	BRCA nonbasal-like c8	BRCA nonbasal-like c7	miRNA cluster 14	cluster 2	mutation cluster 4	TCGA-A8-A08T	TCGA Breast Cancer (BRCA)	breast invasive carcinoma	Breast					64	Right
TCGA-A8-A08X-01	Stage IIIC	43	3	Stage IIIC	1034		Negative	FEMALE	Positive	2	2	1	Negative	M0	Positive	N3	1034	0	Her2	HER2-enriched	Negative	Her2	-13	-10	enrollment	T_Other	T4	LIVING	TCGA-A8-A08X-01	High	C3-BRCA/Luminal	cluster 1	BRCA CIMP c7	BRCA basal-like c6	BRCA nonbasal-like c7	miRNA cluster 7	cluster 3	mutation cluster 5	TCGA-A8-A08X	TCGA Breast Cancer (BRCA)	breast invasive carcinoma	Breast					43	Left
TCGA-A8-A08Z-01	Stage IIIB	76	2	Stage IIIC	1217		Positive	FEMALE	Negative	3	3	3	Negative	M0	Positive	N3	1217	0	LumA	Luminal A	Positive	LumA	-5	-3	enrollment	T_Other	T4	LIVING	TCGA-A8-A08Z-01	BRCA-LUAD+	C3-BRCA/Luminal	cluster 2	BRCA non-CIMP c9	BRCA nonbasal-like c8	BRCA nonbasal-like c7	miRNA cluster 4	cluster 4	mutation cluster 4	TCGA-A8-A08Z	TCGA Breast Cancer (BRCA)	breast invasive carcinoma	Breast					76	Left
TCGA-A8-A090-01	Stage IIA	74	4	Stage IIA	0		Positive	FEMALE	Negative				Negative	M0	Negative	N0	0	0	LumA	Luminal A	Positive		0	-3	enrollment	T_Other	T2	LIVING	TCGA-A8-A090-01	COAD-READ	C3-BRCA/Luminal	cluster 4	BRCA CIMP c7		BRCA nonbasal-like c7	miRNA cluster 14	cluster 2	mutation c1uster 9	TCGA-A8-A090	TCGA Breast Cancer (BRCA)	breast invasive carcinoma	Breast					74	Right
TCGA-A8-A091-01	Stage IIA	61	4	Stage IIA	580		Positive	FEMALE	Negative	1	3	3	Negative	M0	Negative	N0	580	0	LumA	Luminal A	Negative	LumA/B	-10	-3	enrollment	T_Other	T2	LIVING	TCGA-A8-A091-01	Squamous	C3-BRCA/Luminal	cluster 4	BRCA CIMP c7	BRCA nonbasal-like c8	BRCA nonbasal-like c7	miRNA cluster 14	cluster 2	mutation c1uster 9	TCGA-A8-A091	TCGA Breast Cancer (BRCA)	breast invasive carcinoma	Breast					61	Right
TCGA-A8-A092-01	Stage IIIA	48	2	Stage IIIA	518		Positive	FEMALE	Negative				Negative	M0	Positive	N2	518	0	LumB	HER2-enriched	Positive		-2	-3	enrollment	T_Other	T2	LIVING	TCGA-A8-A092-01	High	C3-BRCA/Luminal	cluster 2	BRCA non-CIMP c9		BRCA nonbasal-like c7	miRNA cluster 4	cluster 4	mutation cluster 3	TCGA-A8-A092	TCGA Breast Cancer (BRCA)	breast invasive carcinoma	Breast					48	Left
TCGA-A8-A093-01	Stage IIA	61	3	Stage IIA	545		Positive	FEMALE	Negative				Negative	M0	Negative	N0	545	0	LumA	Luminal A	Positive		-12	-3	enrollment	T_Other	T2	LIVING	TCGA-A8-A093-01	High	C3-BRCA/Luminal	cluster 4	BRCA CIMP c7		BRCA nonbasal-like c7	miRNA cluster 4	cluster 2	mutation cluster 4	TCGA-A8-A093	TCGA Breast Cancer (BRCA)	breast invasive carcinoma	Breast					61	Right
TCGA-A8-A094-01	Stage IIA	75	1	Stage IIA	0		Positive	FEMALE	Negative	2	2	1	Negative	M0	Negative	N0	0	0	Her2	HER2-enriched	Negative	Basal	-11	-5	enrollment	T_Other	T2	LIVING	TCGA-A8-A094-01	Squamous	C3-BRCA/Luminal	cluster 1	BRCA CIMP c7	BRCA basal-like c6	BRCA nonbasal-like c7	miRNA cluster 7	cluster 3	mutation cluster 6	TCGA-A8-A094	TCGA Breast Cancer (BRCA)	breast invasive carcinoma	Breast					75	Left
TCGA-A8-A095-01	Stage I	45	3	Stage I	1276		Positive	FEMALE	Negative				Negative	M0	Negative	N0	1276	0	LumB	Luminal B	Positive	ReacII	-7	-3	enrollment	T1	T1	LIVING	TCGA-A8-A095-01	Iq	C3-BRCA/Luminal	cluster 4	BRCA CIMP c7	KIRC-like c1	BRCA nonbasal-like c7	miRNA cluster 4	cluster 4	mutation cluster 4	TCGA-A8-A095	TCGA Breast Cancer (BRCA)	breast invasive carcinoma	Breast					45	Left
TCGA-A8-A096-01	Stage IIA	73	2	Stage IIA	0		Positive	FEMALE	Negative				Negative	M0	Negative	N0	0	0	LumB	Luminal B	Positive		-12	-4	enrollment	T_Other	T2	LIVING	TCGA-A8-A096-01	Iq	C3-BRCA/Luminal	cluster 4	BRCA CIMP c7		BRCA nonbasal-like c7	miRNA cluster 4	cluster 4	mutation cluster 4	TCGA-A8-A096	TCGA Breast Cancer (BRCA)	breast invasive carcinoma	Breast					73	Right
TCGA-A8-A097-01	Stage IIB	65	5	Stage IIB	365		Positive	FEMALE	Positive				Negative	M0	Positive	N1	365	0	LumA	Luminal B	Positive		0	-2	enrollment	T_Other	T2	LIVING	TCGA-A8-A097-01	High	C3-BRCA/Luminal	cluster 2	BRCA non-CIMP c9		BRCA nonbasal-like c7	miRNA cluster 4	cluster 4	mutation cluster 5	TCGA-A8-A097	TCGA Breast Cancer (BRCA)	breast invasive carcinoma	Breast					65	Left
TCGA-A8-A099-01	Stage X	76	2	Stage IIIC	304		Positive	FEMALE	Positive	4	3	3	Negative	M0	Positive	N3	304	0	LumA	Luminal A	Positive	LumA/B	-12	-3	enrollment	T_Other	T4	LIVING	TCGA-A8-A099-01	Iq	C3-BRCA/Luminal	cluster 3	BRCA CIMP c7	BRCA nonbasal-like c8	BRCA nonbasal-like c7	miRNA cluster 6	cluster 1	mutation cluster 4	TCGA-A8-A099	TCGA Breast Cancer (BRCA)	breast invasive carcinoma	Breast					76	Right
TCGA-A8-A09A-01	Stage X	40	4	Stage IIA	304		Positive	FEMALE	Negative	1	3	3	Negative	M0	Negative	N0	304	0	LumA	Luminal A	Positive	LumA	-3	-3	enrollment	T_Other	T2	LIVING	TCGA-A8-A09A-01	High	C3-BRCA/Luminal	cluster 4	BRCA CIMP c7	BRCA nonbasal-like c8	BRCA nonbasal-like c7	miRNA cluster 14	cluster 4	mutation c1uster 10	TCGA-A8-A09A	TCGA Breast Cancer (BRCA)	breast invasive carcinoma	Breast					40	Left
TCGA-A8-A09B-01	Stage IIIB	58	4	Stage IIIB	365		Positive	FEMALE	Negative	1	3	3	Negative	M0	Positive	N1	365	0	LumA	Luminal A	Positive	LumA	0	-3	enrollment	T_Other	T4	LIVING	TCGA-A8-A09B-01	BRCA-LUAD+	C3-BRCA/Luminal	cluster 4	BRCA CIMP c7	BRCA nonbasal-like c8	BRCA nonbasal-like c7	miRNA cluster 4	cluster 4	mutation cluster 4	TCGA-A8-A09B	TCGA Breast Cancer (BRCA)	breast invasive carcinoma	Breast					58	Left
TCGA-A8-A09C-01	Stage X	69	4	Stage IIA	31		Positive	FEMALE	Negative	3	3	4	Negative	M0	Negative	N0	31	0	LumB	Luminal B	Positive	LumA	0	-3	enrollment	T_Other	T2	LIVING	TCGA-A8-A09C-01	BRCA-LUAD+	C3-BRCA/Luminal	cluster 2	BRCA non-CIMP c9	BRCA nonbasal-like c8	BRCA nonbasal-like c7	miRNA cluster 14	cluster 2	mutation cluster 4	TCGA-A8-A09C	TCGA Breast Cancer (BRCA)	breast invasive carcinoma	Breast					69	Right
TCGA-A8-A09D-01	Stage IIB	47	5	No_Conversion	396		Positive	FEMALE	Negative				Negative	M0	Positive	N1	396	0	LumA	Luminal B	Positive		-3	-3	enrollment	T_Other	T2	LIVING	TCGA-A8-A09D-01	Kirc+	C3-BRCA/Luminal	cluster 1	BRCA non-CIMP c9		BRCA nonbasal-like c7	miRNA cluster 6	cluster 1	mutation cluster 4	TCGA-A8-A09D	TCGA Breast Cancer (BRCA)	breast invasive carcinoma	Breast					47	Right Lower Outer Quadrant
TCGA-A8-A09E-01	Stage IIIB	73		Stage IIIB	942		Positive	FEMALE	Equivocal				Negative	M0	Positive	N1	942	0			Positive				enrollment	T_Other	T4	LIVING	TCGA-A8-A09E-01	High	C3-BRCA/Luminal		BRCA CIMP c7	BRCA nonbasal-like c8		miRNA cluster 14		mutation c1uster 9	TCGA-A8-A09E	TCGA Breast Cancer (BRCA)	breast invasive carcinoma	Breast					73	Left Lower Outer Quadrant
TCGA-A8-A09G-01	Stage IIIC	79	2	Stage IIIC	0		Positive	FEMALE	Positive	3	2	1	Negative	M0	Positive	N3	0	0	Her2	HER2-enriched	Negative	Her2	-11	-5	enrollment	T_Other	T3	LIVING	TCGA-A8-A09G-01	Iq	C3-BRCA/Luminal	cluster 1	BRCA non-CIMP c9	BRCA basal-like c6	BRCA nonbasal-like c7	miRNA cluster 7	cluster 3	mutation c1uster 9	TCGA-A8-A09G	TCGA Breast Cancer (BRCA)	breast invasive carcinoma	Breast					79	Right Lower Outer Quadrant
TCGA-A8-A09I-01	Stage IIA	84	5	Stage IIA	1006		Positive	FEMALE	Positive	1	1	4	Negative	M0	Negative	N0	1006	0	LumB	Luminal B	Positive	Her2	-2	-5	enrollment	T_Other	T2	LIVING	TCGA-A8-A09I-01	BRCA-LUAD+	C3-BRCA/Luminal	cluster 3	BRCA CIMP c7	BRCA basal-like c6	BRCA nonbasal-like c7	miRNA cluster 4	cluster 4	mutation c1uster 9	TCGA-A8-A09I	TCGA Breast Cancer (BRCA)	breast invasive carcinoma	Breast					84	Right Lower Outer Quadrant
TCGA-A8-A09K-01	Stage IIA	68		Stage IIA	911		Positive	FEMALE	Negative				Negative	M0	Positive	N1	911	0	LumA		Positive				enrollment	T1	T1	LIVING	TCGA-A8-A09K-01	High	C3-BRCA/Luminal		BRCA CIMP c7	BRCA nonbasal-like c8	BRCA nonbasal-like c7	miRNA cluster 6		mutation c1uster 9	TCGA-A8-A09K	TCGA Breast Cancer (BRCA)	breast invasive carcinoma	Breast					68	Left Lower Outer Quadrant
TCGA-A8-A09M-01	Stage IIIC	75	5	Stage IIIC	457		Positive	FEMALE	Negative	1	1	4	Negative	M0	Positive	N3	457	0	LumB	Luminal B	Positive	LumA/B	-2	-5	enrollment	T_Other	T2	LIVING	TCGA-A8-A09M-01	High	C3-BRCA/Luminal	cluster 4	BRCA CIMP c7	BRCA nonbasal-like c8	BRCA nonbasal-like c7	miRNA cluster 14	cluster 5	mutation c1uster 10	TCGA-A8-A09M	TCGA Breast Cancer (BRCA)	breast invasive carcinoma	Breast					75	Right Lower Outer Quadrant
TCGA-A8-A09N-01	Stage IIIC	57	1	Stage IIIC	31		Positive	FEMALE	Positive				Negative	M0	Positive	N3	31	0	LumB	Luminal B	Positive		0	-3	enrollment	T_Other	T2	LIVING	TCGA-A8-A09N-01	Squamous	C3-BRCA/Luminal	cluster 4	BRCA CIMP c7		BRCA nonbasal-like c7	miRNA cluster 4	cluster 7	mutation cluster 5	TCGA-A8-A09N	TCGA Breast Cancer (BRCA)	breast invasive carcinoma	Breast					57	Right Lower Outer Quadrant
TCGA-A8-A09Q-01	Stage IIIB	83	2	Stage IIIB	761		Positive	FEMALE	Negative				Negative	M0	Positive	N2	761	0	LumB	Luminal B	Positive		-2	-5	enrollment	T_Other	T4	LIVING	TCGA-A8-A09Q-01	High	C3-BRCA/Luminal	cluster 3	BRCA CIMP c7		BRCA nonbasal-like c7	miRNA cluster 4	cluster 4	mutation cluster 5	TCGA-A8-A09Q	TCGA Breast Cancer (BRCA)	breast invasive carcinoma	Breast					83	Left Lower Inner Quadrant
TCGA-A8-A09R-01	Stage IIB	82	5	Stage IIB	273		Positive	FEMALE	Negative	1	1	4	Negative	M0	Positive	N1	273	0	LumB	Luminal B	Positive	Her2	0	-3	enrollment	T_Other	T2	LIVING	TCGA-A8-A09R-01	BRCA-LUAD+	C3-BRCA/Luminal	cluster 4	BRCA CIMP c7	BRCA nonbasal-like c8	BRCA nonbasal-like c7	miRNA cluster 4	cluster 4	mutation c1uster 9	TCGA-A8-A09R	TCGA Breast Cancer (BRCA)	breast invasive carcinoma	Breast					82	Left Lower Inner Quadrant
TCGA-A8-A09T-01	Stage X	68	4	Stage I	578		Positive	FEMALE	Negative				Negative	M0	Negative	N0	578	0	LumA	Luminal A	Positive		-12	-3	enrollment	T1	T1	LIVING	TCGA-A8-A09T-01	Kirc+	C3-BRCA/Luminal	cluster 2	BRCA non-CIMP c9		BRCA nonbasal-like c7	miRNA cluster 14	cluster 2	mutation c1uster 9	TCGA-A8-A09T	TCGA Breast Cancer (BRCA)	breast invasive carcinoma	Breast					68	Left
TCGA-A8-A09V-01	Stage IIA	51	2	Stage IIA	457		Positive	FEMALE	Negative				Negative	M0	Negative	N0	457	0	LumA	Luminal A	Positive		-12	-3	enrollment	T_Other	T2	LIVING	TCGA-A8-A09V-01	Iq	C3-BRCA/Luminal	cluster 2	BRCA non-CIMP c9		BRCA nonbasal-like c7			mutation c1uster 9	TCGA-A8-A09V	TCGA Breast Cancer (BRCA)	breast invasive carcinoma	Breast					51	Right Upper Inner Quadrant
TCGA-A8-A09W-01	Stage IIIB	70	2	Stage IIIC	30		Positive	FEMALE	Negative				Negative	M0	Positive	N3	30	0	LumB	Luminal B	Positive	Her2	-2	-5	enrollment	T_Other	T2	LIVING	TCGA-A8-A09W-01	BRCA-LUAD+	C3-BRCA/Luminal	cluster 4	BRCA CIMP c7	BRCA nonbasal-like c8	BRCA nonbasal-like c7			mutation c1uster 9	TCGA-A8-A09W	TCGA Breast Cancer (BRCA)	breast invasive carcinoma	Breast					70	Right Upper Inner Quadrant
TCGA-A8-A09X-01	Stage IIIC	62	3	Stage IIIC	426	426	Negative	FEMALE	Negative	2	1	1	Negative	M0	Positive	N3	426	1	Her2	HER2-enriched	Negative	Her2	-11	-5	enrollment	T_Other	T2	DECEASED	TCGA-A8-A09X-01	Kirc+	C3-BRCA/Luminal	cluster 4	BRCA CIMP c7	BRCA basal-like c6	BRCA nonbasal-like c7	miRNA cluster 7	cluster 3	mutation cluster 5	TCGA-A8-A09X	TCGA Breast Cancer (BRCA)	breast invasive carcinoma	Breast					62	Left Upper Inner Quadrant
TCGA-A8-A09Z-01	Stage IIB	83	2	Stage IIB	0		Positive	FEMALE	Negative				Negative	M0	Negative	N0	0	0		Luminal B	Negative	Basal	0	-5	enrollment	T_Other	T3	LIVING	TCGA-A8-A09Z-01	Iq		cluster 4	BRCA CIMP c7	BRCA nonbasal-like c8		miRNA cluster 14	cluster 2		TCGA-A8-A09Z	TCGA Breast Cancer (BRCA)	breast invasive carcinoma	Breast					83	Right
TCGA-A8-A0A1-01	Stage IIA	84	2	Stage IIA	365		Positive	FEMALE	Negative				Negative	M0	Negative	N0	365	0	LumA	Luminal A	Positive		-5	-7	enrollment	T_Other	T2	LIVING	TCGA-A8-A0A1-01	Iq	C3-BRCA/Luminal	cluster 4	BRCA CIMP c7		BRCA nonbasal-like c7	miRNA cluster 14	cluster 4	mutation cluster 4	TCGA-A8-A0A1	TCGA Breast Cancer (BRCA)	breast invasive carcinoma	Breast					84	Right
TCGA-A8-A0A2-01	Stage IIA	66	2	Stage IIA	578		Positive	FEMALE	Negative				Negative	M0	Negative	N0	578	0	LumA	Luminal A	Positive		0	-3	enrollment	T_Other	T2	LIVING	TCGA-A8-A0A2-01	BRCA-LUAD+	C3-BRCA/Luminal	cluster 3	BRCA CIMP c7		BRCA nonbasal-like c7	miRNA cluster 14	cluster 2	mutation c1uster 9	TCGA-A8-A0A2	TCGA Breast Cancer (BRCA)	breast invasive carcinoma	Breast					66	Right Lower Outer Quadrant
TCGA-A8-A0A4-01	Stage IIA	73	2	Stage IIA	396		Positive	FEMALE	Negative	1	3	3	Negative	M0	Negative	N0	396	0	LumA	Luminal A	Positive	ReacII	-5	-7	enrollment	T_Other	T2	LIVING	TCGA-A8-A0A4-01	Iq	C3-BRCA/Luminal	cluster 4	BRCA CIMP c7	BRCA nonbasal-like c8	BRCA nonbasal-like c7	miRNA cluster 7	cluster 3	mutation c1uster 9	TCGA-A8-A0A4	TCGA Breast Cancer (BRCA)	breast invasive carcinoma	Breast					73	Left
TCGA-A8-A0A6-01	Stage IIIC	64	2	Stage IIIC	640		Positive	FEMALE	Negative				Negative	M0	Positive	N3	640	0	LumA	Luminal A	Positive		-5	-4	enrollment	T_Other	T2	LIVING	TCGA-A8-A0A6-01	BRCA-LUAD+		cluster 4	BRCA CIMP c7		BRCA nonbasal-like c7	miRNA cluster 6	cluster 1		TCGA-A8-A0A6	TCGA Breast Cancer (BRCA)	breast invasive carcinoma	Breast					64	Left Upper Outer Quadrant
TCGA-A8-A0A7-01	Stage IIB	57	3	Stage IIB	30		Negative	FEMALE	Positive	1	1	1	Negative	M0	Positive	N1	30	0	Her2	HER2-enriched	Negative	Her2	-2	-5	enrollment	T_Other	T2	LIVING	TCGA-A8-A0A7-01	High	C3-BRCA/Luminal	cluster 1	BRCA non-CIMP c9	BRCA basal-like c6	BRCA nonbasal-like c7	miRNA cluster 4	cluster 4	mutation cluster 4	TCGA-A8-A0A7	TCGA Breast Cancer (BRCA)	breast invasive carcinoma	Breast					57	Right Upper Outer Quadrant
TCGA-A8-A0A9-01	Stage IIA	80	3	Stage IIA	396		Positive	FEMALE	Negative				Negative	M0	Negative	N0	396	0	LumA	Luminal B	Positive		0	-3	enrollment	T_Other	T2	LIVING	TCGA-A8-A0A9-01	High	C3-BRCA/Luminal	cluster 3	BRCA CIMP c7		BRCA nonbasal-like c7	miRNA cluster 14	cluster 2	mutation cluster 4	TCGA-A8-A0A9	TCGA Breast Cancer (BRCA)	breast invasive carcinoma	Breast					80	Left Upper Outer Quadrant
TCGA-A8-A0AB-01	Stage IIA	54	2	Stage IIA	517		Positive	FEMALE	Negative				Negative	M0	Negative	N0	517	0	LumA	Luminal B	Positive		-1	-3	enrollment	T_Other	T2	LIVING	TCGA-A8-A0AB-01	BRCA-LUAD+	C3-BRCA/Luminal	cluster 4	BRCA CIMP c7		BRCA nonbasal-like c7	miRNA cluster 14	cluster 2	mutation c1uster 9	TCGA-A8-A0AB	TCGA Breast Cancer (BRCA)	breast invasive carcinoma	Breast					54	Left Upper Outer Quadrant
TCGA-A8-A0AD-01	Stage I	83	2	Stage I	1157		Positive	FEMALE	Negative				Negative	M0	Negative	N0	1157	0	LumA	Luminal A	Positive		-12	-3	enrollment	T1	T1	LIVING	TCGA-A8-A0AD-01	Kirc+	C3-BRCA/Luminal	cluster 2	BRCA non-CIMP c9		BRCA nonbasal-like c7	miRNA cluster 3	cluster 2	mutation c1uster 9	TCGA-A8-A0AD	TCGA Breast Cancer (BRCA)	breast invasive carcinoma	Breast					83	Right Upper Outer Quadrant
TCGA-AC-A23C-01		62	3	Stage IIB	29		Positive	FEMALE	Positive				Negative	M0	Positive	N1	29	0	LumA		Positive				enrollment	T_Other	T2	LIVING	TCGA-AC-A23C-01	Iq	C3-BRCA/Luminal	cluster 4	BRCA CIMP c7	BRCA nonbasal-like c8	BRCA nonbasal-like c7	miRNA cluster 7	cluster 7	mutation cluster 4	TCGA-AC-A23C	TCGA Breast Cancer (BRCA)	breast invasive carcinoma	Breast					62	Left
TCGA-AC-A23E-01		50	2	Stage IIB	72		Positive	FEMALE	Negative				Negative	M0	Positive	N1	72	0	LumA		Positive				enrollment	T_Other	T2	LIVING	TCGA-AC-A23E-01	BRCA-LUAD+	C3-BRCA/Luminal	cluster 2	BRCA CIMP c7	BRCA nonbasal-like c8	BRCA nonbasal-like c7	miRNA cluster 13		mutation cluster 4	TCGA-AC-A23E	TCGA Breast Cancer (BRCA)	breast invasive carcinoma	Breast					50	Right	Sentinel node biopsy alone
TCGA-AC-A23G-01																			LumA										TCGA-AC-A23G-01	Iq			BRCA non-CIMP c9		BRCA nonbasal-like c7	miRNA cluster 4			TCGA-AC-A23G	TCGA Breast Cancer (BRCA)	breast invasive carcinoma	Breast					76	Right Upper Inner Quadrant
TCGA-AC-A23H-01		90	3	Stage IIA	81		Positive	FEMALE	Positive				Negative	M0	Negative	N0	81	0	Her2		Negative				enrollment	T_Other	T2	LIVING	TCGA-AC-A23H-01	High		cluster 3	BRCA CIMP c7		BRCA nonbasal-like c7	miRNA cluster 4			TCGA-AC-A23H	TCGA Breast Cancer (BRCA)	breast invasive carcinoma	Breast					90	Right Upper Inner Quadrant|Right Lower Inner Quadrant
TCGA-AC-A23H-11		90			81			FEMALE									81	0	Normal						enrollment			LIVING	TCGA-AC-A23H-11										TCGA-AC-A23H	TCGA Breast Cancer (BRCA)	breast invasive carcinoma	Breast					90	Right Upper Inner Quadrant|Right Lower Inner Quadrant
TCGA-AC-A2B8-01			2																LumA										TCGA-AC-A2B8-01	Iq	C3-BRCA/Luminal	cluster 1	BRCA CIMP c7	BRCA nonbasal-like c8	BRCA nonbasal-like c7	miRNA cluster 4			TCGA-AC-A2B8	TCGA Breast Cancer (BRCA)	breast invasive carcinoma	Breast	NO	YES			84	Right	Axillary lymph node dissection alone
TCGA-AC-A2BK-01																			Basal										TCGA-AC-A2BK-01	High	C4-BRCA/Basal		BRCA basal-like c8	BRCA basal-like c6	BRCA basal-like c8	miRNA cluster 4			TCGA-AC-A2BK	TCGA Breast Cancer (BRCA)	breast invasive carcinoma	Breast					78	Left Upper Outer Quadrant	Axillary lymph node dissection alone
TCGA-AC-A2BM-01																			LumB										TCGA-AC-A2BM-01	BRCA-LUAD+	C3-BRCA/Luminal		BRCA CIMP c7	BRCA nonbasal-like c8	BRCA nonbasal-like c7	miRNA cluster 4			TCGA-AC-A2BM	TCGA Breast Cancer (BRCA)	breast invasive carcinoma	Breast					41	Left Upper Inner Quadrant	Sentinel lymph node biopsy plus axillary dissection
TCGA-AC-A2FB-01			3																LumA										TCGA-AC-A2FB-01	Iq	C3-BRCA/Luminal	cluster 1	BRCA non-CIMP c9	KIRC-like c1	BRCA nonbasal-like c7	miRNA cluster 4			TCGA-AC-A2FB	TCGA Breast Cancer (BRCA)	breast invasive carcinoma	Breast					65	Left Upper Inner Quadrant	Sentinel node biopsy alone
TCGA-AC-A2FB-11																			Normal										TCGA-AC-A2FB-11		C3-BRCA/Luminal								TCGA-AC-A2FB	TCGA Breast Cancer (BRCA)	breast invasive carcinoma	Breast					65	Left Upper Inner Quadrant	Sentinel node biopsy alone
TCGA-AC-A2FE-01																													TCGA-AC-A2FE-01	BRCA-LUAD+			BRCA CIMP c7	BRCA nonbasal-like c8		miRNA cluster 5			TCGA-AC-A2FE	TCGA Breast Cancer (BRCA)	breast invasive carcinoma	Breast	YES	NO			62	Right Upper Outer Quadrant	Sentinel lymph node biopsy plus axillary dissection
TCGA-AC-A2FF-01			1																LumA										TCGA-AC-A2FF-01	Quiet	C3-BRCA/Luminal	cluster 1	BRCA non-CIMP c9	BRCA nonbasal-like c8	BRCA nonbasal-like c7	miRNA cluster 4			TCGA-AC-A2FF	TCGA Breast Cancer (BRCA)	breast invasive carcinoma	Breast					40	Right	Sentinel lymph node biopsy plus axillary dissection
TCGA-AC-A2FF-11																			Normal										TCGA-AC-A2FF-11		C3-BRCA/Luminal								TCGA-AC-A2FF	TCGA Breast Cancer (BRCA)	breast invasive carcinoma	Breast					40	Right	Sentinel lymph node biopsy plus axillary dissection
TCGA-AC-A2FG-01			2																LumA										TCGA-AC-A2FG-01	Iq	C3-BRCA/Luminal	cluster 1	BRCA non-CIMP c9	BRCA nonbasal-like c8	BRCA nonbasal-like c7	miRNA c1uster 10			TCGA-AC-A2FG	TCGA Breast Cancer (BRCA)	breast invasive carcinoma	Breast					79	Left Upper Outer Quadrant	Sentinel lymph node biopsy plus axillary dissection
TCGA-AC-A2FG-11																													TCGA-AC-A2FG-11		C3-BRCA/Luminal								TCGA-AC-A2FG	TCGA Breast Cancer (BRCA)	breast invasive carcinoma	Breast					79	Left Upper Outer Quadrant	Sentinel lymph node biopsy plus axillary dissection
TCGA-AC-A2FK-01																			Normal										TCGA-AC-A2FK-01	Quiet			Low purity c2		BRCA nonbasal-like c7	miRNA cluster 5			TCGA-AC-A2FK	TCGA Breast Cancer (BRCA)	breast invasive carcinoma	Breast					45	Left Upper Outer Quadrant
TCGA-AC-A2FM-01																													TCGA-AC-A2FM-01	High			BRCA CIMP c7	BRCA nonbasal-like c8		miRNA cluster 5			TCGA-AC-A2FM	TCGA Breast Cancer (BRCA)	breast invasive carcinoma	Breast	NO	NO			87	Right Upper Inner Quadrant	Sentinel node biopsy alone
TCGA-AC-A2FM-11																													TCGA-AC-A2FM-11										TCGA-AC-A2FM	TCGA Breast Cancer (BRCA)	breast invasive carcinoma	Breast	NO	NO			87	Right Upper Inner Quadrant	Sentinel node biopsy alone
TCGA-AC-A2FO-01																			LumA										TCGA-AC-A2FO-01	Iq			BRCA non-CIMP c9		BRCA nonbasal-like c7	miRNA cluster 14			TCGA-AC-A2FO	TCGA Breast Cancer (BRCA)	breast invasive carcinoma	Breast					65	Left Upper Outer Quadrant	Other (specify)
TCGA-AC-A2QH-01																			Basal										TCGA-AC-A2QH-01	Squamous			Cluster 5		GBM-like c6	miRNA cluster 13			TCGA-AC-A2QH	TCGA Breast Cancer (BRCA)	breast invasive carcinoma	Breast					58	Right Upper Outer Quadrant	Axillary lymph node dissection alone
TCGA-AC-A2QI-01																													TCGA-AC-A2QI-01	BRCA-LUAD+			BRCA non-CIMP c9	BRCA nonbasal-like c8		miRNA cluster 3			TCGA-AC-A2QI	TCGA Breast Cancer (BRCA)	breast invasive carcinoma	Breast					76	Right	Sentinel node biopsy alone
TCGA-AC-A2QJ-01																													TCGA-AC-A2QJ-01	BRCA-LUAD+			BRCA non-CIMP c9	KIRC-like c1		miRNA cluster 5			TCGA-AC-A2QJ	TCGA Breast Cancer (BRCA)	breast invasive carcinoma	Breast	YES	YES			48	Left Upper Outer Quadrant|Left Lower Outer Quadrant	Other (specify)
TCGA-AC-A3BB-01																													TCGA-AC-A3BB-01	BRCA-LUAD+			BRCA non-CIMP c9			miRNA cluster 5			TCGA-AC-A3BB	TCGA Breast Cancer (BRCA)	breast invasive carcinoma	Breast					46	Right Upper Outer Quadrant	Axillary lymph node dissection alone
TCGA-AC-A3EH-01																													TCGA-AC-A3EH-01	BRCA-LUAD+			BRCA CIMP c7			miRNA c1uster 9			TCGA-AC-A3EH	TCGA Breast Cancer (BRCA)	breast invasive carcinoma	Breast					79	Right	Axillary lymph node dissection alone
TCGA-AC-A3HN-01																			LumA										TCGA-AC-A3HN-01	Iq	C3-BRCA/Luminal		BRCA non-CIMP c9	KIRC-like c1	BRCA nonbasal-like c7	miRNA cluster 4			TCGA-AC-A3HN	TCGA Breast Cancer (BRCA)	breast invasive carcinoma	Breast					87	Left Upper Inner Quadrant	Sentinel node biopsy alone
TCGA-AC-A3OD-01																			LumA										TCGA-AC-A3OD-01	High			BRCA CIMP c7		BRCA nonbasal-like c7	miRNA cluster 14			TCGA-AC-A3OD	TCGA Breast Cancer (BRCA)	breast invasive carcinoma	Breast					68	Left	Sentinel lymph node biopsy plus axillary dissection
TCGA-AC-A3QP-01																													TCGA-AC-A3QP-01					BRCA nonbasal-like c8		miRNA cluster 4			TCGA-AC-A3QP	TCGA Breast Cancer (BRCA)	breast invasive carcinoma	Breast					79	Right	Sentinel node biopsy alone
TCGA-AC-A3QQ-01																													TCGA-AC-A3QQ-01	Iq			BRCA non-CIMP c9			miRNA c1uster 10			TCGA-AC-A3QQ	TCGA Breast Cancer (BRCA)	breast invasive carcinoma	Breast					54	Right	Sentinel node biopsy alone
TCGA-AC-A3TM-01																													TCGA-AC-A3TM-01	Iq			BRCA CIMP c7	BRCA nonbasal-like c8		miRNA cluster 4			TCGA-AC-A3TM	TCGA Breast Cancer (BRCA)	breast invasive carcinoma	Breast					50	Right	Sentinel node biopsy alone
TCGA-AC-A3TN-01																													TCGA-AC-A3TN-01	Iq			BRCA CIMP c7	BRCA nonbasal-like c8		miRNA cluster 4			TCGA-AC-A3TN	TCGA Breast Cancer (BRCA)	breast invasive carcinoma	Breast					75	Right	Sentinel lymph node biopsy plus axillary dissection
TCGA-AC-A3W5-01																													TCGA-AC-A3W5-01	High			BRCA CIMP c7	BRCA nonbasal-like c8		miRNA cluster 4			TCGA-AC-A3W5	TCGA Breast Cancer (BRCA)	breast invasive carcinoma	Breast					65	Right	Sentinel node biopsy alone
TCGA-AC-A3W6-01																													TCGA-AC-A3W6-01	Iq			BRCA non-CIMP c9	BRCA nonbasal-like c8		miRNA cluster 4			TCGA-AC-A3W6	TCGA Breast Cancer (BRCA)	breast invasive carcinoma	Breast					90	Right	Sentinel node biopsy alone
TCGA-AC-A3W7-01																													TCGA-AC-A3W7-01	Iq			BRCA non-CIMP c9	BRCA nonbasal-like c8		miRNA cluster 4			TCGA-AC-A3W7	TCGA Breast Cancer (BRCA)	breast invasive carcinoma	Breast					66	Right Upper Outer Quadrant	Sentinel node biopsy alone
TCGA-AC-A3YI-01																													TCGA-AC-A3YI-01										TCGA-AC-A3YI	TCGA Breast Cancer (BRCA)	breast invasive carcinoma	Breast					74	Right	Sentinel lymph node biopsy plus axillary dissection
TCGA-AC-A3YJ-01																													TCGA-AC-A3YJ-01					BRCA nonbasal-like c8					TCGA-AC-A3YJ	TCGA Breast Cancer (BRCA)	breast invasive carcinoma	Breast					66	Right	Sentinel node biopsy alone
TCGA-AC-A4ZE-01																													TCGA-AC-A4ZE-01										TCGA-AC-A4ZE	TCGA Breast Cancer (BRCA)	breast invasive carcinoma	Breast					63	Right Lower Outer Quadrant	Sentinel node biopsy alone
TCGA-AC-A5EH-01																													TCGA-AC-A5EH-01										TCGA-AC-A5EH	TCGA Breast Cancer (BRCA)	breast invasive carcinoma	Breast					76	Left Upper Outer Quadrant	Axillary lymph node dissection alone
TCGA-AC-A5EI-01																													TCGA-AC-A5EI-01										TCGA-AC-A5EI	TCGA Breast Cancer (BRCA)	breast invasive carcinoma	Breast					88	Right Upper Outer Quadrant	Sentinel node biopsy alone
TCGA-AC-A5XS-01																													TCGA-AC-A5XS-01										TCGA-AC-A5XS	TCGA Breast Cancer (BRCA)	breast invasive carcinoma	Breast					74	Left Upper Inner Quadrant	Sentinel node biopsy alone
TCGA-AC-A5XU-01																													TCGA-AC-A5XU-01										TCGA-AC-A5XU	TCGA Breast Cancer (BRCA)	breast invasive carcinoma	Breast					74	Left Upper Outer Quadrant	Sentinel node biopsy alone
TCGA-AC-A62V-01																													TCGA-AC-A62V-01										TCGA-AC-A62V	TCGA Breast Cancer (BRCA)	breast invasive carcinoma	Breast					58	Right Lower Outer Quadrant	Axillary lymph node dissection alone
TCGA-AC-A62X-01																													TCGA-AC-A62X-01										TCGA-AC-A62X	TCGA Breast Cancer (BRCA)	breast invasive carcinoma	Breast					72	Left Upper Inner Quadrant	Axillary lymph node dissection alone
TCGA-AC-A62Y-01																													TCGA-AC-A62Y-01										TCGA-AC-A62Y	TCGA Breast Cancer (BRCA)	breast invasive carcinoma	Breast					79	Right	Sentinel node biopsy alone
TCGA-AC-A6IV-01																													TCGA-AC-A6IV-01										TCGA-AC-A6IV	TCGA Breast Cancer (BRCA)	breast invasive carcinoma	Breast					47	Right	Sentinel node biopsy alone
TCGA-AC-A6IW-01																													TCGA-AC-A6IW-01										TCGA-AC-A6IW	TCGA Breast Cancer (BRCA)	breast invasive carcinoma	Breast					73	Left Upper Outer Quadrant	Sentinel node biopsy alone
TCGA-AC-A6IX-01																													TCGA-AC-A6IX-01										TCGA-AC-A6IX	TCGA Breast Cancer (BRCA)	breast invasive carcinoma	Breast					49	Left Upper Outer Quadrant	Axillary lymph node dissection alone
TCGA-AC-A6IX-06																													TCGA-AC-A6IX-06										TCGA-AC-A6IX	TCGA Breast Cancer (BRCA)	breast invasive carcinoma	Breast					49	Left Upper Outer Quadrant	Axillary lymph node dissection alone
TCGA-AC-A6NO-01																													TCGA-AC-A6NO-01										TCGA-AC-A6NO	TCGA Breast Cancer (BRCA)	breast invasive carcinoma	Breast					43	Right	Axillary lymph node dissection alone
TCGA-AC-A7VB-01																													TCGA-AC-A7VB-01										TCGA-AC-A7VB	TCGA Breast Cancer (BRCA)	breast invasive carcinoma	Breast					51	Right Lower Outer Quadrant	Sentinel lymph node biopsy plus axillary dissection
TCGA-AC-A7VC-01																													TCGA-AC-A7VC-01										TCGA-AC-A7VC	TCGA Breast Cancer (BRCA)	breast invasive carcinoma	Breast					56	Left	Sentinel node biopsy alone
TCGA-AC-A8OP-01																													TCGA-AC-A8OP-01										TCGA-AC-A8OP	TCGA Breast Cancer (BRCA)	breast invasive carcinoma	Breast					72	Right Lower Inner Quadrant	Sentinel node biopsy alone
TCGA-AC-A8OQ-01																													TCGA-AC-A8OQ-01										TCGA-AC-A8OQ	TCGA Breast Cancer (BRCA)	breast invasive carcinoma	Breast					72	Right Upper Outer Quadrant	Sentinel node biopsy alone
TCGA-AC-A8OR-01																													TCGA-AC-A8OR-01										TCGA-AC-A8OR	TCGA Breast Cancer (BRCA)	breast invasive carcinoma	Breast					75	Left	Sentinel node biopsy alone
TCGA-AC-A8OS-01																													TCGA-AC-A8OS-01										TCGA-AC-A8OS	TCGA Breast Cancer (BRCA)	breast invasive carcinoma	Breast					71	Right Upper Outer Quadrant	Sentinel node biopsy alone
TCGA-AN-A03X-01	Stage IIA	74	4	No_Conversion	10		Positive	FEMALE	Negative				Negative	M0	Negative	N0	10	0	LumA	Luminal A	Positive		0	-3	enrollment	T_Other	T2	LIVING	TCGA-AN-A03X-01	BRCA-LUAD+	C3-BRCA/Luminal	cluster 3	BRCA CIMP c7		BRCA nonbasal-like c7	miRNA cluster 4	cluster 4	mutation cluster 4	TCGA-AN-A03X	TCGA Breast Cancer (BRCA)	breast invasive carcinoma	Breast					74	Left Upper Outer Quadrant	No axillary staging
TCGA-AN-A03Y-01	Stage IIA	66	3	No_Conversion	10		Positive	FEMALE	Negative				Negative	M0	Negative	N0	10	0	LumB	Luminal B	Positive		-1	-3	enrollment	T_Other	T2	LIVING	TCGA-AN-A03Y-01	High	C3-BRCA/Luminal	cluster 4	BRCA CIMP c7		BRCA nonbasal-like c7	miRNA cluster 14	cluster 5	mutation cluster 4	TCGA-AN-A03Y	TCGA Breast Cancer (BRCA)	breast invasive carcinoma	Breast					66	Left Upper Outer Quadrant	No axillary staging
TCGA-AN-A041-01	Stage IIB	29	5	Stage IIB	7		Positive	FEMALE	Equivocal	1	3	4	Negative	M0	Positive	N1	7	0	LumA	Luminal B	Negative	LumA	-2	-3	enrollment	T_Other	T2	LIVING	TCGA-AN-A041-01	High	C3-BRCA/Luminal	cluster 4	BRCA CIMP c7	BRCA nonbasal-like c8	BRCA nonbasal-like c7	miRNA cluster 4	cluster 4	mutation c1uster 9	TCGA-AN-A041	TCGA Breast Cancer (BRCA)	breast invasive carcinoma	Breast					29	Left Upper Outer Quadrant
TCGA-AN-A046-01	Stage IIA	68	2	No_Conversion	10		Positive	FEMALE	Negative				Negative	M0	Negative	N0	10	0	LumA	Luminal A	Positive		0	-3	enrollment	T_Other	T2	LIVING	TCGA-AN-A046-01	Iq		cluster 4	BRCA CIMP c7		BRCA nonbasal-like c7	miRNA cluster 12	cluster 4		TCGA-AN-A046	TCGA Breast Cancer (BRCA)	breast invasive carcinoma	Breast					68	Right Lower Inner Quadrant	No axillary staging
TCGA-AN-A049-01	Stage IIA	62	5	No_Conversion	19		Positive	FEMALE	Negative	1	3	4	Negative	M0	Negative	N0	19	0	LumA	Luminal B	Positive	ReacI	0	-3	enrollment	T_Other	T2	LIVING	TCGA-AN-A049-01	Squamous	C3-BRCA/Luminal	cluster 4	BRCA CIMP c7	BRCA nonbasal-like c8	BRCA nonbasal-like c7	miRNA cluster 7	cluster 3	mutation cluster 4	TCGA-AN-A049	TCGA Breast Cancer (BRCA)	breast invasive carcinoma	Breast					62	Left Upper Outer Quadrant	No axillary staging
TCGA-AN-A04A-01	Stage IIIA	36	5	No_Conversion	89		Positive	FEMALE	Negative	3	3	3	Negative	M0	Positive	N2	89	0	LumA	Luminal A	Positive	LumA/B	-5	-3	enrollment	T_Other	T2	LIVING	TCGA-AN-A04A-01	Squamous	C3-BRCA/Luminal	cluster 2	BRCA non-CIMP c9	BRCA nonbasal-like c8	BRCA nonbasal-like c7	miRNA cluster 4	cluster 4	mutation c1uster 9	TCGA-AN-A04A	TCGA Breast Cancer (BRCA)	breast invasive carcinoma	Breast					36	Left Lower Inner Quadrant|Left Lower Outer Quadrant	No axillary staging
TCGA-AN-A04C-01	Stage IIB	51	3	No_Conversion	54		Negative	FEMALE	Positive				Negative	M0	Positive	N1	54	0	Her2	HER2-enriched	Negative		-11	-9	enrollment	T_Other	T2	LIVING	TCGA-AN-A04C-01	High	C3-BRCA/Luminal	cluster 4	BRCA non-CIMP c9		BRCA nonbasal-like c7	miRNA cluster 6	cluster 5	mutation cluster 3	TCGA-AN-A04C	TCGA Breast Cancer (BRCA)	breast invasive carcinoma	Breast					51	Left Upper Outer Quadrant	Axillary lymph node dissection alone
TCGA-AN-A04D-01	Stage IIB	58	1	No_Conversion	52		Negative	FEMALE	Negative	2	2	2	Negative	M0	Positive	N1	52	0	Basal	Basal-like	Negative	Basal	-13	0	enrollment	T_Other	T2	LIVING	TCGA-AN-A04D-01	High	C4-BRCA/Basal	cluster 5	BRCA basal-like c8	BRCA basal-like c6	BRCA basal-like c8	miRNA cluster 12	cluster 5	mutation c1uster 9	TCGA-AN-A04D	TCGA Breast Cancer (BRCA)	breast invasive carcinoma	Breast					58	Left Upper Outer Quadrant	No axillary staging
TCGA-AN-A0AJ-01	Stage IIB	79	5	No_Conversion	243		Positive	FEMALE	Positive	1	1	4	Negative	M0	Negative	N0	243	0	LumB	Luminal B	Positive	LumA	-2	-5	enrollment	T_Other	T3	LIVING	TCGA-AN-A0AJ-01	High	C3-BRCA/Luminal	cluster 3	BRCA CIMP c7	BRCA nonbasal-like c8	BRCA nonbasal-like c7	miRNA cluster 4	cluster 4	mutation cluster 2	TCGA-AN-A0AJ	TCGA Breast Cancer (BRCA)	breast invasive carcinoma	Breast					79	Left Upper Outer Quadrant	Axillary lymph node dissection alone
TCGA-AN-A0AK-01	Stage IIA	76	1	No_Conversion	223		Positive	FEMALE	Negative				Negative	M0	Negative	N0	223	0	LumB	Luminal B	Negative	Basal	-10	-5	enrollment	T_Other	T2	LIVING	TCGA-AN-A0AK-01	Squamous	C3-BRCA/Luminal	cluster 4	BRCA CIMP c7	BRCA nonbasal-like c8	BRCA nonbasal-like c7	miRNA cluster 6	cluster 1		TCGA-AN-A0AK	TCGA Breast Cancer (BRCA)	breast invasive carcinoma	Breast					76	Left Upper Outer Quadrant	Axillary lymph node dissection alone
TCGA-AN-A0AL-01	Stage IIIB	41	1	No_Conversion	197		Negative	FEMALE	Negative	2	2	2	Negative	M0	Negative	N0	197	0	Basal	Basal-like	Negative	Basal	-13	0	enrollment	T_Other	T4	LIVING	TCGA-AN-A0AL-01	Squamous	C4-BRCA/Basal	cluster 5	Low purity c2	BRCA basal-like c6	BRCA basal-like c8	miRNA cluster 7	cluster 3	mutation cluster 5	TCGA-AN-A0AL	TCGA Breast Cancer (BRCA)	breast invasive carcinoma	Breast					41	Left Lower Outer Quadrant	Axillary lymph node dissection alone
TCGA-AN-A0AM-01	Stage IIA	56	3	No_Conversion	5		Positive	FEMALE	Negative	1	1	4	Negative	M0	Negative	N0	5	0	LumB	Luminal B	Negative	LumA/B	-2	-5	enrollment	T_Other	T2	LIVING	TCGA-AN-A0AM-01	High	C3-BRCA/Luminal	cluster 4	BRCA CIMP c7	BRCA nonbasal-like c8	BRCA nonbasal-like c7	miRNA cluster 4	cluster 4	mutation c1uster 9	TCGA-AN-A0AM	TCGA Breast Cancer (BRCA)	breast invasive carcinoma	Breast					56	Left Upper Outer Quadrant	No axillary staging
TCGA-AN-A0AR-01	Stage IIA	55	1	No_Conversion	9		Negative	FEMALE	Negative	2	2	2	Negative	M0	Negative	N0	9	0		Basal-like	Negative	Basal	-13	0	enrollment	T_Other	T2	LIVING	TCGA-AN-A0AR-01	Squamous	C8-BLCA	cluster 5	Cluster 5	BRCA basal-like c6		miRNA cluster 12	cluster 5	mutation cluster 5	TCGA-AN-A0AR	TCGA Breast Cancer (BRCA)	breast invasive carcinoma	Breast					55	Right Upper Inner Quadrant	No axillary staging
TCGA-AN-A0AS-01	Stage IIIA	70	3	No_Conversion	9		Positive	FEMALE	Negative	3	3	4	Negative	M0	Positive	N2	9	0	LumA	Luminal B	Negative	Basal	-1	-3	enrollment	T_Other	T2	LIVING	TCGA-AN-A0AS-01	BRCA-LUAD+	C3-BRCA/Luminal	cluster 2	BRCA non-CIMP c9	BRCA nonbasal-like c8	BRCA nonbasal-like c7	miRNA cluster 14	cluster 2	mutation cluster 5	TCGA-AN-A0AS	TCGA Breast Cancer (BRCA)	breast invasive carcinoma	Breast					70	Left Upper Outer Quadrant	No axillary staging
TCGA-AN-A0AT-01	Stage IIA	62	1	No_Conversion	10		Negative	FEMALE	Negative				Negative	M0	Negative	N0	10	0	Basal	Basal-like	Negative	Basal	-13	-12	enrollment	T_Other	T2	LIVING	TCGA-AN-A0AT-01	Squamous	C4-BRCA/Basal	cluster 5	BRCA basal-like c8	BRCA basal-like c6	BRCA basal-like c8			mutation c1uster 9	TCGA-AN-A0AT	TCGA Breast Cancer (BRCA)	breast invasive carcinoma	Breast					62	Right Upper Inner Quadrant	No axillary staging
TCGA-AN-A0FD-01	Stage IIA	71	1	No_Conversion	195		Positive	FEMALE	Positive	3	3	3	Negative	M0	Negative	N0	195	0	LumA	Luminal A	Positive	LumA/B	-8	-3	enrollment	T_Other	T2	LIVING	TCGA-AN-A0FD-01	BRCA-LUAD+	C3-BRCA/Luminal	cluster 2	BRCA non-CIMP c9	BRCA nonbasal-like c8	BRCA nonbasal-like c7	miRNA cluster 4	cluster 4	mutation c1uster 9	TCGA-AN-A0FD	TCGA Breast Cancer (BRCA)	breast invasive carcinoma	Breast					71	Left Upper Outer Quadrant	Axillary lymph node dissection alone
TCGA-AN-A0FE-01																													TCGA-AN-A0FE-01										TCGA-AN-A0FE	TCGA Breast Cancer (BRCA)	breast invasive carcinoma	Breast
TCGA-AN-A0FF-01	Stage IA	32	3	No_Conversion	140		Positive	FEMALE	Negative	1	3	4	Negative	M0	Negative	N0	140	0	LumB	Luminal B	Positive	LumA	0	-3	enrollment	T1	T1	LIVING	TCGA-AN-A0FF-01	Iq	C3-BRCA/Luminal	cluster 4	BRCA CIMP c7	BRCA nonbasal-like c8	BRCA nonbasal-like c7	miRNA cluster 6	cluster 1	mutation cluster 4	TCGA-AN-A0FF	TCGA Breast Cancer (BRCA)	breast invasive carcinoma	Breast					32	Left Upper Outer Quadrant	Axillary lymph node dissection alone
TCGA-AN-A0FG-01																													TCGA-AN-A0FG-01										TCGA-AN-A0FG	TCGA Breast Cancer (BRCA)	breast invasive carcinoma	Breast
TCGA-AN-A0FJ-01	Stage IV	59	1	No_Conversion	241		Positive	FEMALE	Negative	2	2	2	Negative	M0	Positive	N2	241	0	Basal	Basal-like	Negative	Basal	-13	0	enrollment	T_Other	T2	LIVING	TCGA-AN-A0FJ-01	Squamous	C4-BRCA/Basal	cluster 5	BRCA basal-like c8	BRCA basal-like c6	BRCA basal-like c8	miRNA cluster 12	cluster 5	mutation cluster 5	TCGA-AN-A0FJ	TCGA Breast Cancer (BRCA)	breast invasive carcinoma	Breast					59	Left Upper Outer Quadrant	Axillary lymph node dissection alone
TCGA-AN-A0FK-01	Stage IIIB	88	2	No_Conversion	212		Positive	FEMALE	Negative	3	3	4	Negative	M0	Negative	N0	212	0	LumA	Luminal B	Positive	LumA	-12	-3	enrollment	T_Other	T4	LIVING	TCGA-AN-A0FK-01	BRCA-LUAD+	C3-BRCA/Luminal	cluster 2	BRCA non-CIMP c9	BRCA nonbasal-like c8	BRCA nonbasal-like c7	miRNA cluster 4	cluster 4	mutation c1uster 9	TCGA-AN-A0FK	TCGA Breast Cancer (BRCA)	breast invasive carcinoma	Breast					88	Right Lower Outer Quadrant	Axillary lymph node dissection alone
TCGA-AN-A0FL-01	Stage IIA	62	1	No_Conversion	230		Negative	FEMALE	Negative	2	2	2	Negative	M0	Negative	N0	230	0	Basal	Basal-like	Negative	Basal	-13	0	enrollment	T_Other	T2	LIVING	TCGA-AN-A0FL-01	High	C4-BRCA/Basal	cluster 5	BRCA basal-like c8	BRCA basal-like c6	BRCA basal-like c8	miRNA cluster 12	cluster 5	mutation cluster 5	TCGA-AN-A0FL	TCGA Breast Cancer (BRCA)	breast invasive carcinoma	Breast					62	Left Upper Inner Quadrant	Axillary lymph node dissection alone
TCGA-AN-A0FN-01	Stage IB	61	1	No_Conversion	218		Positive	FEMALE	Negative				Negative	M0	Negative	N0	218	0	LumA	Luminal A	Positive		-5	-7	enrollment	T1	T1	LIVING	TCGA-AN-A0FN-01	Iq	C3-BRCA/Luminal	cluster 1	BRCA non-CIMP c9		BRCA nonbasal-like c7	miRNA cluster 4	cluster 4	mutation c1uster 9	TCGA-AN-A0FN	TCGA Breast Cancer (BRCA)	breast invasive carcinoma	Breast					61	Right Lower Outer Quadrant	Axillary lymph node dissection alone
TCGA-AN-A0FS-01	Stage IB	55	2	No_Conversion	191		Positive	FEMALE	Negative	3	4	3	Negative	M0	Negative	N0	191	0	LumA	Luminal A	Negative	ReacII	-5	-7	enrollment	T1	T1	LIVING	TCGA-AN-A0FS-01	Iq	C3-BRCA/Luminal	cluster 2	BRCA non-CIMP c9	BRCA nonbasal-like c8	BRCA nonbasal-like c7	miRNA cluster 14	cluster 2	mutation cluster 4	TCGA-AN-A0FS	TCGA Breast Cancer (BRCA)	breast invasive carcinoma	Breast					55	Right Lower Outer Quadrant	Axillary lymph node dissection alone
TCGA-AN-A0FT-01	Stage IIB	63	3	No_Conversion	183		Positive	FEMALE	Positive	4	5	3	Negative	M0	Positive	N1	183	0	LumA	Luminal A	Positive	Her2	-2	-3	enrollment	T_Other	T2	LIVING	TCGA-AN-A0FT-01	High	C3-BRCA/Luminal	cluster 3	BRCA CIMP c7	BRCA basal-like c6	BRCA nonbasal-like c7	miRNA cluster 6	cluster 5	mutation cluster 5	TCGA-AN-A0FT	TCGA Breast Cancer (BRCA)	breast invasive carcinoma	Breast					63	Right Lower Outer Quadrant	Axillary lymph node dissection alone
TCGA-AN-A0FV-01	Stage IIA	58	1	No_Conversion	10		Negative	FEMALE	Positive	1	1	1	Negative	M0	Negative	N0	10	0	Her2	HER2-enriched	Negative	Her2	-11	-5	enrollment	T_Other	T2	LIVING	TCGA-AN-A0FV-01	BRCA-LUAD+	C3-BRCA/Luminal	cluster 2	BRCA non-CIMP c9	BRCA basal-like c6	BRCA nonbasal-like c7	miRNA cluster 6	cluster 4	mutation cluster 5	TCGA-AN-A0FV	TCGA Breast Cancer (BRCA)	breast invasive carcinoma	Breast					58	Right Upper Outer Quadrant	No axillary staging
TCGA-AN-A0FW-01	Stage IIIA	67	3	No_Conversion	11		Positive	FEMALE	Negative	4	3	3	Negative	M0	Positive	N2	11	0	LumA	Luminal A	Indeterminate	LumA/B	-4	-3	enrollment	T_Other	T2	LIVING	TCGA-AN-A0FW-01	BRCA-LUAD+	C3-BRCA/Luminal	cluster 3	BRCA CIMP c7	BRCA nonbasal-like c8	BRCA nonbasal-like c7	miRNA cluster 6	cluster 1	mutation c1uster 9	TCGA-AN-A0FW	TCGA Breast Cancer (BRCA)	breast invasive carcinoma	Breast					67	Left Upper Outer Quadrant	No axillary staging
TCGA-AN-A0FX-01	Stage IIA	52	1	No_Conversion	10		Negative	FEMALE	Negative	1	1	2	Negative	M0	Negative	N0	10	0	Basal	Basal-like	Negative	ReacII	-13	-11	enrollment	T_Other	T2	LIVING	TCGA-AN-A0FX-01	High	C4-BRCA/Basal	cluster 4	BRCA basal-like c8	KIRC-like c1	BRCA basal-like c8	miRNA cluster 4	cluster 4	mutation cluster 5	TCGA-AN-A0FX	TCGA Breast Cancer (BRCA)	breast invasive carcinoma	Breast					52	Left Upper Outer Quadrant	No axillary staging
TCGA-AN-A0FY-01	Stage IB	55	3	No_Conversion	10		Positive	FEMALE	Negative	3	3	4	Negative	M0	Negative	N0	10	0	LumB	Luminal B	Positive	LumA	-2	-3	enrollment	T1	T1	LIVING	TCGA-AN-A0FY-01	High	C3-BRCA/Luminal	cluster 2	Cluster 5	BRCA nonbasal-like c8	BRCA nonbasal-like c7	miRNA cluster 4	cluster 5	mutation cluster 5	TCGA-AN-A0FY	TCGA Breast Cancer (BRCA)	breast invasive carcinoma	Breast					55	Left Upper Outer Quadrant	No axillary staging
TCGA-AN-A0FZ-01	Stage IIIA	45	3	No_Conversion	10		Positive	FEMALE	Equivocal	3	3	3	Negative	M0	Positive	N2	10	0	LumA	Luminal A	Negative	LumA/B	-3	-3	enrollment	T_Other	T2	LIVING	TCGA-AN-A0FZ-01	High	C3-BRCA/Luminal	cluster 2	BRCA non-CIMP c9	BRCA nonbasal-like c8	BRCA nonbasal-like c7	miRNA cluster 12	cluster 4	mutation c1uster 9	TCGA-AN-A0FZ	TCGA Breast Cancer (BRCA)	breast invasive carcinoma	Breast					45	Left Upper Outer Quadrant	No axillary staging
TCGA-AN-A0G0-01	Stage IIA	56		No_Conversion	16		Negative	FEMALE	Negative				Negative	M0	Negative	N0	16	0	Basal	Basal-like	Negative	Basal	-13	0	enrollment	T_Other	T2	LIVING	TCGA-AN-A0G0-01		C4-BRCA/Basal	cluster 5	BRCA basal-like c8	BRCA basal-like c6	BRCA basal-like c8	miRNA cluster 7	cluster 3	mutation cluster 5	TCGA-AN-A0G0	TCGA Breast Cancer (BRCA)	breast invasive carcinoma	Breast					56	Right Upper Inner Quadrant	No axillary staging
TCGA-AN-A0XL-01	Stage IIA	61	5	Stage IIA	10		Positive	FEMALE	Negative				Negative	M0	Negative	N0	10	0	LumA	Luminal A	Positive		-5	-7	enrollment	T_Other	T2	LIVING	TCGA-AN-A0XL-01	High	C3-BRCA/Luminal	cluster 2	BRCA non-CIMP c9		BRCA nonbasal-like c7	miRNA cluster 4	cluster 6	mutation cluster 14	TCGA-AN-A0XL	TCGA Breast Cancer (BRCA)	breast invasive carcinoma	Breast					61	Left Upper Outer Quadrant
TCGA-AN-A0XN-01	Stage IIIA	68	4	Stage IIIA	10		Negative	FEMALE	Negative	1	3	3	Negative	M0	Positive	N2	10	0	LumA	Luminal A	Positive	ReacI	-5	-3	enrollment	T_Other	T2	LIVING	TCGA-AN-A0XN-01	High	C3-BRCA/Luminal	cluster 3	BRCA CIMP c7	BRCA nonbasal-like c8	BRCA nonbasal-like c7	miRNA cluster 4	cluster 4	mutation cluster 2	TCGA-AN-A0XN	TCGA Breast Cancer (BRCA)	breast invasive carcinoma	Breast					68	Right Upper Inner Quadrant
TCGA-AN-A0XO-01	Stage IIIA	59	2	Stage IIIA	375		Positive	FEMALE	Negative	1	3	3	Negative	M0	Positive	N2	375	0	LumA	Luminal A	Negative	LumA/B	-7	-3	enrollment	T_Other	T2	LIVING	TCGA-AN-A0XO-01	BRCA-LUAD+	C3-BRCA/Luminal	cluster 4	BRCA CIMP c7	BRCA nonbasal-like c8	BRCA nonbasal-like c7	miRNA cluster 4	cluster 4	mutation cluster 4	TCGA-AN-A0XO	TCGA Breast Cancer (BRCA)	breast invasive carcinoma	Breast					59	Left Upper Outer Quadrant
TCGA-AN-A0XP-01	Stage IIIA	69	2	Stage IIIA	9		Positive	FEMALE	Negative	3	3	3	Negative	M0	Positive	N2	9	0	LumA	Luminal A	Positive	LumA	-12	-3	enrollment	T_Other	T2	LIVING	TCGA-AN-A0XP-01	BRCA-LUAD+	C3-BRCA/Luminal	cluster 2	BRCA non-CIMP c9	BRCA nonbasal-like c8	BRCA nonbasal-like c7	miRNA cluster 4	cluster 4	mutation cluster 4	TCGA-AN-A0XP	TCGA Breast Cancer (BRCA)	breast invasive carcinoma	Breast					69	Right Upper Inner Quadrant
TCGA-AN-A0XR-01	Stage IIIA	55	2	Stage IIIA	10		Positive	FEMALE	Negative				Negative	M0	Positive	N2	10	0	LumB	Luminal B	Negative		-12	-3	enrollment	T_Other	T2	LIVING	TCGA-AN-A0XR-01	Iq	C3-BRCA/Luminal	cluster 3	BRCA CIMP c7		BRCA nonbasal-like c7	miRNA cluster 4	cluster 4	mutation cluster 4	TCGA-AN-A0XR	TCGA Breast Cancer (BRCA)	breast invasive carcinoma	Breast					55	Left Upper Outer Quadrant
TCGA-AN-A0XS-01	Stage IIIA	63	4	Stage IIIA	10		Negative	FEMALE	Negative	3	3	3	Negative	M0	Positive	N2	10	0	LumA	Luminal A	Positive	LumA	-5	-4	enrollment	T_Other	T2	LIVING	TCGA-AN-A0XS-01	Squamous	C3-BRCA/Luminal	cluster 2	BRCA non-CIMP c9	BRCA nonbasal-like c8	BRCA nonbasal-like c7	miRNA cluster 4	cluster 4	mutation cluster 14	TCGA-AN-A0XS	TCGA Breast Cancer (BRCA)	breast invasive carcinoma	Breast					63	Left Upper Outer Quadrant
TCGA-AN-A0XT-01	Stage IIIA	54	2	Stage IIIA	10		Positive	FEMALE	Negative	3	3	3	Negative	M0	Positive	N2	10	0	LumA	Luminal A	Negative	LumA/B	0	-3	enrollment	T_Other	T2	LIVING	TCGA-AN-A0XT-01	BRCA-LUAD+	C3-BRCA/Luminal	cluster 5	Low purity c2	BRCA nonbasal-like c8	BRCA nonbasal-like c7	miRNA cluster 12	cluster 7	mutation cluster 5	TCGA-AN-A0XT	TCGA Breast Cancer (BRCA)	breast invasive carcinoma	Breast					54	Left Upper Outer Quadrant
TCGA-AN-A0XU-01	Stage IIA	54	1	Stage IIA	10		Negative	FEMALE	Negative	2	2	2	Negative	M0	Negative	N0	10	0	Basal	Basal-like	Negative	Basal	-13	-12	enrollment	T_Other	T2	LIVING	TCGA-AN-A0XU-01	Squamous	C4-BRCA/Basal	cluster 5	BRCA basal-like c8	BRCA basal-like c6	BRCA basal-like c8	miRNA cluster 4	cluster 4	mutation cluster 5	TCGA-AN-A0XU	TCGA Breast Cancer (BRCA)	breast invasive carcinoma	Breast					54	Left Upper Outer Quadrant
TCGA-AN-A0XV-01	Stage IIIA	67	4	Stage IIIA	162		Positive	FEMALE	Negative				Negative	M0	Positive	N2	162	0	LumA	Luminal A	Positive		0	0	enrollment	T_Other	T2	LIVING	TCGA-AN-A0XV-01	Kirc+	C3-BRCA/Luminal	cluster 4	BRCA CIMP c7		BRCA nonbasal-like c7	miRNA cluster 14	cluster 2	mutation c1uster 9	TCGA-AN-A0XV	TCGA Breast Cancer (BRCA)	breast invasive carcinoma	Breast					67	Right Upper Outer Quadrant	Axillary lymph node dissection alone
TCGA-AN-A0XW-01	Stage IIIA	36	5	Stage IIIA	170		Positive	FEMALE	Negative	1	1	4	Negative	M0	Positive	N2	170	0	LumA	Luminal B	Positive	Her2	-2	-4	enrollment	T_Other	T2	LIVING	TCGA-AN-A0XW-01	High	C3-BRCA/Luminal	cluster 2	BRCA non-CIMP c9	BRCA nonbasal-like c8	BRCA nonbasal-like c7	miRNA cluster 4	cluster 4	mutation c1uster 9	TCGA-AN-A0XW	TCGA Breast Cancer (BRCA)	breast invasive carcinoma	Breast					36	Left Upper Outer Quadrant	Sentinel node biopsy alone
TCGA-AO-A03L-01	Stage IIIA	34	5	No_Conversion	2442		Positive	FEMALE	Negative	1	3	1	Negative	M0	Positive	N2	2442	0	LumA	HER2-enriched	Positive	Basal	-2	-4	followup	T_Other	T3	LIVING	TCGA-AO-A03L-01	High	C3-BRCA/Luminal	cluster 4	BRCA CIMP c7	BRCA nonbasal-like c8	BRCA nonbasal-like c7	miRNA cluster 6	cluster 1	mutation cluster 3	TCGA-AO-A03L	TCGA Breast Cancer (BRCA)	breast invasive carcinoma	Breast					34	Right Upper Inner Quadrant|Right Upper Outer Quadrant|Right Lower Inner Quadrant|Right Lower Outer Quadrant|Right	Sentinel lymph node biopsy plus axillary dissection
TCGA-AO-A03M-01	Stage IA	29	1	Stage I	1455		Positive	FEMALE	Negative				Negative	M0	Negative	N0	1455	0	LumA	Luminal A	Positive	ReacII	-2	-5	followup	T1	T1	LIVING	TCGA-AO-A03M-01	High	C3-BRCA/Luminal	cluster 1	Cluster 5	BRCA nonbasal-like c8	BRCA nonbasal-like c7	miRNA cluster 4	cluster 7		TCGA-AO-A03M	TCGA Breast Cancer (BRCA)	breast invasive carcinoma	Breast					29	Left Upper Outer Quadrant|Left	Sentinel node biopsy alone
TCGA-AO-A03N-01	Stage IIB	59	3	No_Conversion	1645		Positive	FEMALE	Negative	3	3	4	Negative	M0	Positive	N1	1645	0	LumB	HER2-enriched	Positive	Her2	-2	-3	followup	T_Other	T2	LIVING	TCGA-AO-A03N-01	BRCA-LUAD+	C3-BRCA/Luminal	cluster 2	BRCA non-CIMP c9	BRCA nonbasal-like c8	BRCA nonbasal-like c7	miRNA cluster 12	cluster 6	mutation cluster 2	TCGA-AO-A03N	TCGA Breast Cancer (BRCA)	breast invasive carcinoma	Breast	YES	NO	NO		59	Left Upper Inner Quadrant|Left Upper Outer Quadrant|Left	Sentinel lymph node biopsy plus axillary dissection
TCGA-AO-A03O-01	Stage IIA	69	3	Stage IIA	993	2483	Positive	FEMALE	Negative	1	1	4	Negative	M0	Negative	N0	2483	1	LumB	Luminal B	Positive	LumA/B	-2	-5	followup	T_Other	T2	DECEASED	TCGA-AO-A03O-01	High	C3-BRCA/Luminal	cluster 4	BRCA CIMP c7	BRCA nonbasal-like c8	BRCA nonbasal-like c7	miRNA cluster 6	cluster 1	mutation cluster 8	TCGA-AO-A03O	TCGA Breast Cancer (BRCA)	breast invasive carcinoma	Breast					69	Right Upper Outer Quadrant|Right	Sentinel lymph node biopsy plus axillary dissection
TCGA-AO-A03P-01	Stage IIA	54	3	No_Conversion	2576		Positive	FEMALE	Negative				Negative	M0	Positive	N1	2576	0	LumB	Luminal B	Positive	LumA/B	-10	-5	enrollment	T_Other	T2	LIVING	TCGA-AO-A03P-01	High	C3-BRCA/Luminal	cluster 2	BRCA non-CIMP c9	BRCA nonbasal-like c8	BRCA nonbasal-like c7			mutation c1uster 9	TCGA-AO-A03P	TCGA Breast Cancer (BRCA)	breast invasive carcinoma	Breast	YES	NO	NO		54	Right Upper Outer Quadrant|Right	Sentinel lymph node biopsy plus axillary dissection
TCGA-AO-A03R-01	Stage IIB	57	4	No_Conversion	1707		Positive	FEMALE	Negative				Negative	M0	Positive	N1	1707	0	Normal	Normal-like	Positive		0	0	followup	T_Other	T2	LIVING	TCGA-AO-A03R-01	BRCA-LUAD+	C3-BRCA/Luminal	cluster 2	BRCA non-CIMP c9		BRCA nonbasal-like c7	miRNA cluster 3	cluster 2	mutation cluster 5	TCGA-AO-A03R	TCGA Breast Cancer (BRCA)	breast invasive carcinoma	Breast					57	Left Upper Inner Quadrant|Left Upper Outer Quadrant|Left	Sentinel lymph node biopsy plus axillary dissection
TCGA-AO-A03T-01	Stage IIB	42	5	No_Conversion	1187		Positive	FEMALE	Negative				Negative	M0	Positive	N1	1187	0	Normal	Normal-like	Positive		-2	-3	enrollment	T_Other	T2	LIVING	TCGA-AO-A03T-01	High	C3-BRCA/Luminal	cluster 2	BRCA non-CIMP c9		BRCA nonbasal-like c7	miRNA cluster 4	cluster 4	mutation cluster 12	TCGA-AO-A03T	TCGA Breast Cancer (BRCA)	breast invasive carcinoma	Breast					42	Left Upper Outer Quadrant|Left	Sentinel lymph node biopsy plus axillary dissection
TCGA-AO-A03U-01	Stage IA	31	1	Stage I	1727	1796	Negative	FEMALE	Negative	2	2	2	Negative	M0	Negative	N0	1796	1	Normal	Normal-like	Negative	Basal	-5	0	followup	T1	T1	DECEASED	TCGA-AO-A03U-01	Kirc+	C4-BRCA/Basal	cluster 5	Low purity c2	BRCA basal-like c6	BRCA basal-like c8	miRNA cluster 4	cluster 4	mutation c1uster 9	TCGA-AO-A03U	TCGA Breast Cancer (BRCA)	breast invasive carcinoma	Breast			NO		31	Left Upper Inner Quadrant|Left Upper Outer Quadrant|Left Lower Inner Quadrant|Left Lower Outer Quadrant|Left	Sentinel node biopsy alone
TCGA-AO-A03V-01	Stage IA	41	1	Stage I	886		Positive	FEMALE	Negative				Negative	M0	Negative	N0	886	0	LumA	Luminal A	Positive		0	-3	followup	T1	T1	LIVING	TCGA-AO-A03V-01	COAD-READ	C3-BRCA/Luminal	cluster 2	BRCA non-CIMP c9		BRCA nonbasal-like c7	miRNA c1uster 10	cluster 7	mutation cluster 5	TCGA-AO-A03V	TCGA Breast Cancer (BRCA)	breast invasive carcinoma	Breast					41	Left Upper Inner Quadrant|Left	Sentinel node biopsy alone
TCGA-AO-A0J2-01	Stage IA	41	3	Stage I	585		Negative	FEMALE	Negative	2	2	2	Negative	M0	Negative	N0	585	0	Her2	HER2-enriched	Negative	Basal	-11	-9	followup	T1	T1	LIVING	TCGA-AO-A0J2-01	High	C3-BRCA/Luminal	cluster 5	BRCA basal-like c8	BRCA basal-like c6	BRCA nonbasal-like c7	miRNA cluster 4	cluster 4	mutation cluster 5	TCGA-AO-A0J2	TCGA Breast Cancer (BRCA)	breast invasive carcinoma	Breast					41	Left Lower Inner Quadrant|Left	Sentinel node biopsy alone
TCGA-AO-A0J3-01	Stage IIB	67	5	No_Conversion	302		Positive	FEMALE	Negative	4	3	4	Negative	M0	Positive	N1	302	0	LumB	Luminal B	Positive	LumA/B	-10	-3	followup	T_Other	T2	LIVING	TCGA-AO-A0J3-01	Squamous	C3-BRCA/Luminal	cluster 3	BRCA CIMP c7	BRCA nonbasal-like c8	BRCA nonbasal-like c7	miRNA cluster 12	cluster 1	mutation c1uster 9	TCGA-AO-A0J3	TCGA Breast Cancer (BRCA)	breast invasive carcinoma	Breast					67	Right Upper Inner Quadrant|Right Upper Outer Quadrant|Right Lower Inner Quadrant|Right Lower Outer Quadrant|Right	Axillary lymph node dissection alone
TCGA-AO-A0J4-01	Stage IA	41	1	Stage I	294		Negative	FEMALE	Negative				Negative	M0	Negative	N0	294	0	Basal	Basal-like	Negative		-13	-12	followup	T1	T1	LIVING	TCGA-AO-A0J4-01	High	C4-BRCA/Basal	cluster 5	BRCA basal-like c8		BRCA basal-like c8	miRNA cluster 4	cluster 4	mutation cluster 5	TCGA-AO-A0J4	TCGA Breast Cancer (BRCA)	breast invasive carcinoma	Breast					41	Left Upper Outer Quadrant|Left	Sentinel node biopsy alone
TCGA-AO-A0J5-01	Stage IV	48		No_Conversion	704		Positive	FEMALE	Negative				Positive	M1	Positive	N1	704	0	LumA		Negative				followup	T_Other	T4	LIVING	TCGA-AO-A0J5-01	BRCA-LUAD+	C3-BRCA/Luminal		BRCA CIMP c7	BRCA nonbasal-like c8	BRCA nonbasal-like c7	miRNA cluster 4		mutation cluster 4	TCGA-AO-A0J5	TCGA Breast Cancer (BRCA)	breast invasive carcinoma	Breast					48	Right Upper Inner Quadrant|Right Upper Outer Quadrant|Right Lower Inner Quadrant|Right Lower Outer Quadrant|Right	Axillary lymph node dissection alone
TCGA-AO-A0J6-01	Stage IIA	61	1	Stage IIA	775		Negative	FEMALE	Negative	2	2	2	Negative	M0	Negative	N0	775	0	Basal	Basal-like	Negative	Basal	-13	-12	followup	T_Other	T2	LIVING	TCGA-AO-A0J6-01	High	C4-BRCA/Basal	cluster 5	BRCA basal-like c8	BRCA basal-like c6	BRCA basal-like c8	miRNA cluster 14	cluster 2	mutation cluster 5	TCGA-AO-A0J6	TCGA Breast Cancer (BRCA)	breast invasive carcinoma	Breast					61	Left Upper Outer Quadrant|Left	Sentinel node biopsy alone
TCGA-AO-A0J7-01	Stage IIB	71	2	No_Conversion	260		Positive	FEMALE	Negative	1	3	4	Negative	M0	Positive	N1	260	0	LumB	Luminal B	Positive	LumA/B	0	-3	followup	T_Other	T2	LIVING	TCGA-AO-A0J7-01	Squamous	C3-BRCA/Luminal	cluster 4	BRCA CIMP c7	BRCA nonbasal-like c8	BRCA nonbasal-like c7	miRNA cluster 14	cluster 2	mutation cluster 4	TCGA-AO-A0J7	TCGA Breast Cancer (BRCA)	breast invasive carcinoma	Breast					71	Left Upper Inner Quadrant|Left Lower Inner Quadrant|Left	Sentinel lymph node biopsy plus axillary dissection
TCGA-AO-A0J8-01	Stage IIA	61	2	Stage IIA	277		Positive	FEMALE	Negative	3	4	3	Negative	M0	Negative	N0	277	0	LumA	Luminal A	Positive	ReacI	-12	-3	followup	T_Other	T2	LIVING	TCGA-AO-A0J8-01	Iq	C3-BRCA/Luminal	cluster 1	BRCA non-CIMP c9	BRCA nonbasal-like c8	BRCA nonbasal-like c7	miRNA cluster 14	cluster 2	mutation c1uster 9	TCGA-AO-A0J8	TCGA Breast Cancer (BRCA)	breast invasive carcinoma	Breast					61	Right Upper Outer Quadrant|Right	Sentinel node biopsy alone
TCGA-AO-A0J9-01	Stage IIIC	61	2	No_Conversion	1255		Positive	FEMALE	Negative	1	4	3	Negative	M0	Positive	N3	1255	0	LumA	Luminal A	Positive	ReacI	-2	-3	followup	T_Other	T2	LIVING	TCGA-AO-A0J9-01	High	C3-BRCA/Luminal	cluster 4	BRCA CIMP c7	BRCA nonbasal-like c8	BRCA nonbasal-like c7	miRNA cluster 14	cluster 2	mutation c1uster 9	TCGA-AO-A0J9	TCGA Breast Cancer (BRCA)	breast invasive carcinoma	Breast	YES	NO	YES		61	Right Upper Inner Quadrant|Right Upper Outer Quadrant|Right	Sentinel lymph node biopsy plus axillary dissection
TCGA-AO-A0JA-01	Stage IIIC	36	2	No_Conversion	346		Positive	FEMALE	Negative				Negative	M0	Positive	N3	346	0	LumA	Luminal A	Positive		-4	-4	followup	T_Other	T2	LIVING	TCGA-AO-A0JA-01	BRCA-LUAD+	C3-BRCA/Luminal	cluster 4	BRCA CIMP c7		BRCA nonbasal-like c7	miRNA cluster 6	cluster 1	mutation cluster 4	TCGA-AO-A0JA	TCGA Breast Cancer (BRCA)	breast invasive carcinoma	Breast	YES	NO	NO		36	Right Upper Inner Quadrant|Right Lower Inner Quadrant|Right	Sentinel lymph node biopsy plus axillary dissection
TCGA-AO-A0JB-01	Stage IIIA	50	1	No_Conversion	1150		Positive	FEMALE	Negative	2	2	2	Negative	M0	Positive	N1	1150	0		Normal-like	Positive	Basal	-2	-3	followup	T_Other	T3	LIVING	TCGA-AO-A0JB-01	High	C3-BRCA/Luminal	cluster 5	BRCA non-CIMP c9	BRCA nonbasal-like c8		miRNA cluster 14	cluster 2	mutation cluster 5	TCGA-AO-A0JB	TCGA Breast Cancer (BRCA)	breast invasive carcinoma	Breast					50	Left Upper Inner Quadrant|Left Upper Outer Quadrant|Left Lower Outer Quadrant|Left	Axillary lymph node dissection alone
TCGA-AO-A0JC-01	Stage IIA	64	1	Stage IIA	1547		Positive	FEMALE	Negative	2	2	2	Negative	M0	Negative	N0	1547	0	LumA	Luminal B	Positive	LumA	-2	-5	followup	T_Other	T2	LIVING	TCGA-AO-A0JC-01	Quiet	C3-BRCA/Luminal	cluster 5	Low purity c2	BRCA nonbasal-like c8	BRCA nonbasal-like c7	miRNA cluster 14	cluster 2	mutation c1uster 9	TCGA-AO-A0JC	TCGA Breast Cancer (BRCA)	breast invasive carcinoma	Breast					64	Right Upper Outer Quadrant|Right Lower Outer Quadrant|Right	Sentinel lymph node biopsy plus axillary dissection
TCGA-AO-A0JD-01	Stage IIIA	59	2	No_Conversion	1813		Positive	FEMALE	Negative	3	3	4	Negative	M0	Positive	N1	1813	0	LumB	Luminal B	Positive	Basal	-2	-2	followup	T_Other	T3	LIVING	TCGA-AO-A0JD-01	Squamous	C3-BRCA/Luminal	cluster 2	BRCA non-CIMP c9	BRCA nonbasal-like c8	BRCA nonbasal-like c7	miRNA c1uster 10	cluster 5	mutation cluster 8	TCGA-AO-A0JD	TCGA Breast Cancer (BRCA)	breast invasive carcinoma	Breast					59	Left Upper Outer Quadrant|Left	Sentinel lymph node biopsy plus axillary dissection
TCGA-AO-A0JE-01	Stage IIIA	53	5	No_Conversion	1965		Negative	FEMALE	Positive	1	1	1	Negative	M0	Positive	N2	1965	0	Her2	HER2-enriched	Negative	Her2	-11	-5	followup	T_Other	T2	LIVING	TCGA-AO-A0JE-01	High	C3-BRCA/Luminal	cluster 4	BRCA CIMP c7	BRCA basal-like c6	BRCA nonbasal-like c7	miRNA cluster 7	cluster 4	mutation cluster 3	TCGA-AO-A0JE	TCGA Breast Cancer (BRCA)	breast invasive carcinoma	Breast					53	Right Lower Outer Quadrant|Right	Sentinel lymph node biopsy plus axillary dissection
TCGA-AO-A0JF-01	Stage IIA	68	2	No_Conversion	354		Positive	FEMALE	Negative	3	4	3	Negative	M0	Positive	N1	354	0	LumA	Luminal A	Positive	ReacI	-5	-7	followup	T1	T1	LIVING	TCGA-AO-A0JF-01	Iq	C3-BRCA/Luminal	cluster 2	BRCA non-CIMP c9	BRCA nonbasal-like c8	BRCA nonbasal-like c7	miRNA cluster 4	cluster 7	mutation cluster 4	TCGA-AO-A0JF	TCGA Breast Cancer (BRCA)	breast invasive carcinoma	Breast					68	Left Upper Outer Quadrant|Left	Sentinel lymph node biopsy plus axillary dissection
TCGA-AO-A0JG-01	Stage IIIA	49	5	No_Conversion	449		Positive	FEMALE	Negative	1	3	3	Negative	M0	Positive	N2	449	0	LumA	Luminal A	Positive	LumA/B	-5	-7	followup	T_Other	T2	LIVING	TCGA-AO-A0JG-01	BRCA-LUAD+	C3-BRCA/Luminal	cluster 4	BRCA non-CIMP c9	BRCA nonbasal-like c8	BRCA nonbasal-like c7	miRNA cluster 6	cluster 1	mutation cluster 4	TCGA-AO-A0JG	TCGA Breast Cancer (BRCA)	breast invasive carcinoma	Breast					49	Right Lower Outer Quadrant|Right	Axillary lymph node dissection alone
TCGA-AO-A0JI-01	Stage IIA	56	4	No_Conversion	1172		Positive	FEMALE	Negative	4	3	4	Negative	M0	Positive	N1	1172	0	LumA	Luminal B	Negative	LumA/B	-10	-3	followup	T1	T1	LIVING	TCGA-AO-A0JI-01	Kirc+	C3-BRCA/Luminal	cluster 3	BRCA CIMP c7	BRCA nonbasal-like c8	BRCA nonbasal-like c7	miRNA cluster 14	cluster 2	mutation c1uster 9	TCGA-AO-A0JI	TCGA Breast Cancer (BRCA)	breast invasive carcinoma	Breast					56	Left Upper Outer Quadrant|Left	Sentinel lymph node biopsy plus axillary dissection
TCGA-AO-A0JJ-01	Stage IIB	54	2	No_Conversion	1512		Positive	FEMALE	Negative	3	4	3	Negative	M0	Positive	N1	1512	0	LumA	Luminal A	Positive	LumA/B	-5	-7	enrollment	T_Other	T2	LIVING	TCGA-AO-A0JJ-01	Iq	C3-BRCA/Luminal	cluster 1	BRCA non-CIMP c9	BRCA nonbasal-like c8	BRCA nonbasal-like c7	miRNA cluster 3	cluster 7	mutation c1uster 9	TCGA-AO-A0JJ	TCGA Breast Cancer (BRCA)	breast invasive carcinoma	Breast					54	Left Upper Outer Quadrant|Left	Sentinel lymph node biopsy plus axillary dissection
TCGA-AO-A0JL-01	Stage IIIA	59	3	No_Conversion	1319		Negative	FEMALE	Negative	2	2	2	Negative	M0	Positive	N2	1319	0	Basal	Basal-like	Negative	Basal	-13	0	followup	T_Other	T2	LIVING	TCGA-AO-A0JL-01	High	C4-BRCA/Basal	cluster 5	BRCA basal-like c8	BRCA basal-like c6	BRCA basal-like c8	miRNA cluster 12	cluster 5	mutation cluster 5	TCGA-AO-A0JL	TCGA Breast Cancer (BRCA)	breast invasive carcinoma	Breast					59	Left Upper Outer Quadrant|Left Lower Outer Quadrant|Left	Axillary lymph node dissection alone
TCGA-AO-A0JM-01	Stage IIB	40	3	No_Conversion	1826		Positive	FEMALE	Positive	4	5	4	Negative	M0	Positive	N1	1826	0	LumB	Luminal B	Positive	ReacII	-2	-5	followup	T_Other	T2	LIVING	TCGA-AO-A0JM-01	High	C3-BRCA/Luminal	cluster 3	BRCA CIMP c7	KIRC-like c1	BRCA nonbasal-like c7	miRNA cluster 12	cluster 5	mutation c1uster 9	TCGA-AO-A0JM	TCGA Breast Cancer (BRCA)	breast invasive carcinoma	Breast					40	Right Lower Inner Quadrant|Right Lower Outer Quadrant|Right	Sentinel lymph node biopsy plus axillary dissection
TCGA-AO-A124-01	Stage IIA	38	3	Stage IIA	3119		Negative	FEMALE	Negative				Negative	M0	Negative	N0	3119	0	Basal	Basal-like	Negative	Basal	-13	-12	followup	T_Other	T2	LIVING	TCGA-AO-A124-01	High	C4-BRCA/Basal	cluster 5	BRCA basal-like c8	BRCA basal-like c6	BRCA basal-like c8	miRNA cluster 7	cluster 3	mutation cluster 5	TCGA-AO-A124	TCGA Breast Cancer (BRCA)	breast invasive carcinoma	Breast					38	Left	Sentinel lymph node biopsy plus axillary dissection
TCGA-AO-A125-01	Stage IIA	72	2	Stage IIA	3018		Positive	FEMALE	Negative				Negative	M0	Negative	N0	3018	0	LumA	Luminal A	Positive		-12	-3	followup	T_Other	T2	LIVING	TCGA-AO-A125-01	BRCA-LUAD+	C3-BRCA/Luminal	cluster 4	BRCA CIMP c7		BRCA nonbasal-like c7	miRNA cluster 7	cluster 3	mutation cluster 4	TCGA-AO-A125	TCGA Breast Cancer (BRCA)	breast invasive carcinoma	Breast					72	Left Upper Inner Quadrant|Left Upper Outer Quadrant|Left	Sentinel node biopsy alone
TCGA-AO-A126-01	Stage IIA	39	5	Stage IIA	2850		Positive	FEMALE	Negative	1	3	3	Negative	M0	Negative	N0	2850	0	LumA	Luminal A	Positive	Her2	0	-3	followup	T_Other	T2	LIVING	TCGA-AO-A126-01	Squamous	C3-BRCA/Luminal	cluster 4	BRCA CIMP c7	BRCA nonbasal-like c8	BRCA nonbasal-like c7	miRNA cluster 4	cluster 6	mutation cluster 14	TCGA-AO-A126	TCGA Breast Cancer (BRCA)	breast invasive carcinoma	Breast	NO	YES	YES	NO	39	Right Upper Inner Quadrant|Right	Sentinel node biopsy alone
TCGA-AO-A128-01	Stage IIA	61	3	Stage IIA	2877		Negative	FEMALE	Negative				Negative	M0	Negative	N0	2877	0	Basal	Basal-like	Negative	Basal	-13	0	followup	T_Other	T2	LIVING	TCGA-AO-A128-01	BRCA-LUAD+	C4-BRCA/Basal	cluster 5	Cluster 5	BRCA basal-like c6	BRCA basal-like c8	miRNA cluster 14	cluster 6		TCGA-AO-A128	TCGA Breast Cancer (BRCA)	breast invasive carcinoma	Breast					61	Right Lower Outer Quadrant|Right	Sentinel node biopsy alone
TCGA-AO-A129-01	Stage IIB	29	1	No_Conversion	2923		Negative	FEMALE	Negative	2	2	2	Negative	M0	Positive	N1	2923	0	Basal	Basal-like	Negative	Basal	-13	-12	followup	T_Other	T2	LIVING	TCGA-AO-A129-01	High	C4-BRCA/Basal	cluster 5	BRCA basal-like c8	BRCA basal-like c6	BRCA basal-like c8	miRNA cluster 4	cluster 3	mutation cluster 5	TCGA-AO-A129	TCGA Breast Cancer (BRCA)	breast invasive carcinoma	Breast					29	Left Lower Outer Quadrant|Left	Axillary lymph node dissection alone
TCGA-AO-A12A-01	Stage IIA	47	2	Stage IIA	2754		Positive	FEMALE	Negative	3	4	3	Negative	M0	Negative	N0	2754	0	LumA	Luminal A	Positive	LumA	-5	-7	followup	T_Other	T2	LIVING	TCGA-AO-A12A-01	BRCA-LUAD+	C3-BRCA/Luminal	cluster 2	BRCA non-CIMP c9	BRCA nonbasal-like c8	BRCA nonbasal-like c7	miRNA cluster 14	cluster 6	mutation cluster 4	TCGA-AO-A12A	TCGA Breast Cancer (BRCA)	breast invasive carcinoma	Breast					47	Right Upper Outer Quadrant|Right	Sentinel lymph node biopsy plus axillary dissection
TCGA-AO-A12B-01	Stage IIA	63	3	Stage IIA	2359		Positive	FEMALE	Negative	3	3	4	Negative	M0	Negative	N0	2359	0	LumA	Luminal B	Positive	LumA/B	-12	-3	followup	T_Other	T2	LIVING	TCGA-AO-A12B-01	Iq	C3-BRCA/Luminal	cluster 2	BRCA non-CIMP c9	BRCA nonbasal-like c8	BRCA nonbasal-like c7	miRNA cluster 7	cluster 3	mutation c1uster 9	TCGA-AO-A12B	TCGA Breast Cancer (BRCA)	breast invasive carcinoma	Breast					63	Right Upper Inner Quadrant|Right Lower Inner Quadrant|Right	Sentinel node biopsy alone
TCGA-AO-A12C-01	Stage IIB	42	2	No_Conversion	1993		Positive	FEMALE	Positive				Negative	M0	Positive	N1	1993	0	LumA	Luminal A	Positive	ReacI	-5	-7	followup	T_Other	T2	LIVING	TCGA-AO-A12C-01	Kirc+	C3-BRCA/Luminal	cluster 4	BRCA non-CIMP c9	BRCA nonbasal-like c8	BRCA nonbasal-like c7	miRNA cluster 13	cluster 6		TCGA-AO-A12C	TCGA Breast Cancer (BRCA)	breast invasive carcinoma	Breast					42	Left Upper Outer Quadrant|Left	Sentinel lymph node biopsy plus axillary dissection
TCGA-AO-A12D-01	Stage IIA	43	3	No_Conversion	1948		Negative	FEMALE	Positive	2	2	1	Negative	M0	Positive	N1	1948	0	Her2	HER2-enriched	Negative	Her2	-11	-10	followup	T1	T1	LIVING	TCGA-AO-A12D-01	High	C3-BRCA/Luminal	cluster 5	Cluster 5	BRCA basal-like c6	BRCA nonbasal-like c7	miRNA cluster 7	cluster 3	mutation cluster 5	TCGA-AO-A12D	TCGA Breast Cancer (BRCA)	breast invasive carcinoma	Breast					43	Left Upper Outer Quadrant|Left	Sentinel lymph node biopsy plus axillary dissection
TCGA-AO-A12E-01	Stage IIB	51	3	Stage IIB	1742		Positive	FEMALE	Negative	4	3	3	Negative	M0	Negative	N0	1742	0	LumA	Luminal A	Positive	LumA/B	-5	-7	followup	T_Other	T3	LIVING	TCGA-AO-A12E-01	High	C3-BRCA/Luminal	cluster 3	BRCA CIMP c7	BRCA nonbasal-like c8	BRCA nonbasal-like c7	miRNA cluster 6	cluster 1	mutation c1uster 9	TCGA-AO-A12E	TCGA Breast Cancer (BRCA)	breast invasive carcinoma	Breast					51	Right Lower Inner Quadrant|Right Lower Outer Quadrant|Right	Axillary lymph node dissection alone
TCGA-AO-A12F-01	Stage IIA	36	1	Stage IIA	1471		Negative	FEMALE	Negative	2	2	2	Negative	M0	Negative	N0	1471	0	Basal	Basal-like	Negative	Basal	-13	0	followup	T_Other	T2	LIVING	TCGA-AO-A12F-01	High	C4-BRCA/Basal	cluster 5	BRCA basal-like c8	BRCA basal-like c6	BRCA basal-like c8	miRNA cluster 12	cluster 5	mutation c1uster 9	TCGA-AO-A12F	TCGA Breast Cancer (BRCA)	breast invasive carcinoma	Breast					36	Right Upper Outer Quadrant|Right	Sentinel node biopsy alone
TCGA-AO-A12G-01	Stage IIA	75	2	Stage IIA	1265		Positive	FEMALE	Negative	1	3	3	Negative	M0	Negative	N0	1265	0	LumA	Luminal A	Positive	LumA/B	-1	0	followup	T_Other	T2	LIVING	TCGA-AO-A12G-01	Squamous	C3-BRCA/Luminal	cluster 4	BRCA CIMP c7	BRCA nonbasal-like c8	BRCA nonbasal-like c7	miRNA cluster 14	cluster 2	mutation cluster 8	TCGA-AO-A12G	TCGA Breast Cancer (BRCA)	breast invasive carcinoma	Breast					75	Right Upper Outer Quadrant|Right	Sentinel node biopsy alone
TCGA-AO-A12H-01	Stage IIA	69	1	Stage IIA	862		Positive	FEMALE	Negative	3	3	3	Negative	M0	Negative	N0	862	0	LumA	Luminal A	Positive	LumA/B	-12	-3	followup	T_Other	T2	LIVING	TCGA-AO-A12H-01	Quiet	C3-BRCA/Luminal	cluster 2	BRCA non-CIMP c9	BRCA nonbasal-like c8	BRCA nonbasal-like c7	miRNA cluster 6	cluster 2	mutation cluster 4	TCGA-AO-A12H	TCGA Breast Cancer (BRCA)	breast invasive carcinoma	Breast					69	Right Upper Outer Quadrant|Right	Sentinel node biopsy alone
TCGA-AO-A1KO-01	Stage IIB	46	1	Stage IIB	448		Positive	FEMALE	Negative				Negative	M0	Negative	N0	448	0	Normal		Positive				followup	T_Other	T3	LIVING	TCGA-AO-A1KO-01	Quiet	C3-BRCA/Luminal	cluster 5	Low purity c2	BRCA nonbasal-like c8	BRCA nonbasal-like c7	miRNA cluster 7	cluster 6	mutation c1uster 9	TCGA-AO-A1KO	TCGA Breast Cancer (BRCA)	breast invasive carcinoma	Breast					46	Left Upper Outer Quadrant|Left Lower Outer Quadrant|Left	Sentinel lymph node biopsy plus axillary dissection
TCGA-AO-A1KP-01	Stage IIA	77	2	Stage IIA	2513		Positive	FEMALE	Negative				Negative	M0	Positive	N1	2513	0	LumB		Positive				followup	T1	T1	LIVING	TCGA-AO-A1KP-01	BRCA-LUAD+	C3-BRCA/Luminal	cluster 4	BRCA CIMP c7	BRCA nonbasal-like c8	BRCA nonbasal-like c7	miRNA cluster 13	cluster 6	mutation c1uster 9	TCGA-AO-A1KP	TCGA Breast Cancer (BRCA)	breast invasive carcinoma	Breast					77	Left Lower Inner Quadrant|Left Lower Outer Quadrant|Left	Sentinel lymph node biopsy plus axillary dissection
TCGA-AO-A1KQ-01	Stage IIIB	84	4	Stage IIIB	1519		Positive	MALE	Negative				Negative	M0	Positive	N1	1519	0	LumB		Positive				followup	T_Other	T4	LIVING	TCGA-AO-A1KQ-01	High	C3-BRCA/Luminal	cluster 2	BRCA non-CIMP c9	BRCA nonbasal-like c8	BRCA nonbasal-like c7	miRNA cluster 4	cluster 4		TCGA-AO-A1KQ	TCGA Breast Cancer (BRCA)	breast invasive carcinoma	Breast					84	Left Upper Inner Quadrant|Left Upper Outer Quadrant|Left Lower Inner Quadrant|Left	Sentinel lymph node biopsy plus axillary dissection
TCGA-AO-A1KR-01		51	1		2140		Negative	FEMALE									2140	0	Basal		Negative				enrollment			LIVING	TCGA-AO-A1KR-01	High	C4-BRCA/Basal	cluster 5	BRCA basal-like c8	BRCA basal-like c6	BRCA basal-like c8	miRNA cluster 7	cluster 3	mutation cluster 4	TCGA-AO-A1KR	TCGA Breast Cancer (BRCA)	breast invasive carcinoma	Breast					51	Right Upper Inner Quadrant	Sentinel node biopsy alone
TCGA-AO-A1KS-01	Stage IIA	69	5	Stage IIA	16		Positive	FEMALE	Negative				Negative	M0	Negative	N0	16	0	LumB		Positive				followup	T_Other	T2	LIVING	TCGA-AO-A1KS-01	High	C3-BRCA/Luminal	cluster 4	BRCA non-CIMP c9	BRCA nonbasal-like c8	BRCA nonbasal-like c7	miRNA cluster 12	cluster 5	mutation c1uster 9	TCGA-AO-A1KS	TCGA Breast Cancer (BRCA)	breast invasive carcinoma	Breast					69	Left Lower Inner Quadrant|Left Lower Outer Quadrant|Left	Sentinel node biopsy alone
TCGA-AO-A1KT-01	Stage IIA	78	2	Stage IIA	541		Positive	FEMALE	Negative				Negative	M0	Positive	N1	541	0	LumB		Positive				followup	T1	T1	LIVING	TCGA-AO-A1KT-01	High	C3-BRCA/Luminal	cluster 3	BRCA CIMP c7	BRCA nonbasal-like c8	BRCA nonbasal-like c7	miRNA cluster 4	cluster 4	mutation c1uster 9	TCGA-AO-A1KT	TCGA Breast Cancer (BRCA)	breast invasive carcinoma	Breast					78	Left Upper Outer Quadrant|Left	Sentinel node biopsy alone
TCGA-AQ-A04H-01	Stage IIIA	61	5	No_Conversion	439		Positive	FEMALE	Positive						Positive	N2	439	0	LumB	Luminal B	Positive		-10	-3	followup	T_Other	T2	LIVING	TCGA-AQ-A04H-01	High	C3-BRCA/Luminal	cluster 3	BRCA CIMP c7		BRCA nonbasal-like c7	miRNA c1uster 10	cluster 7	mutation cluster 5	TCGA-AQ-A04H	TCGA Breast Cancer (BRCA)	breast invasive carcinoma	Breast					61	Left Lower Inner Quadrant	Axillary lymph node dissection alone
TCGA-AQ-A04J-01	Stage IIA	45	1	Stage IIA	499		Negative	FEMALE	Negative				Negative	M0	Negative	N0	499	0	Basal	Basal-like	Negative		-13	-12	followup	T_Other	T2	LIVING	TCGA-AQ-A04J-01	Squamous	C4-BRCA/Basal	cluster 5	BRCA basal-like c8		BRCA basal-like c8	miRNA cluster 4	cluster 4	mutation cluster 5	TCGA-AQ-A04J	TCGA Breast Cancer (BRCA)	breast invasive carcinoma	Breast					45	Right Upper Outer Quadrant	Axillary lymph node dissection alone
TCGA-AQ-A04L-01	Stage IIA	48	1	Stage IIA	3344		Positive	FEMALE	Positive	2	2	2	Negative	M0	Negative	N0	3344	0	LumA	Luminal A	Negative	ReacI	-1	-5	followup	T_Other	T2	LIVING	TCGA-AQ-A04L-01	High	C3-BRCA/Luminal	cluster 3	BRCA CIMP c7	KIRC-like c1	BRCA nonbasal-like c7	miRNA cluster 7	cluster 3	mutation cluster 13	TCGA-AQ-A04L	TCGA Breast Cancer (BRCA)	breast invasive carcinoma	Breast					48	Right	Sentinel node biopsy alone
TCGA-AQ-A0Y5-01	Stage IIIA	70	3	Stage IIIA		161	Positive	FEMALE	Positive				Negative	M0	Positive	N2	161	1	LumA		Positive				followup	T_Other	T2	DECEASED	TCGA-AQ-A0Y5-01	High	C3-BRCA/Luminal	cluster 4	BRCA CIMP c7		BRCA nonbasal-like c7	miRNA cluster 4	cluster 4	mutation cluster 4	TCGA-AQ-A0Y5	TCGA Breast Cancer (BRCA)	breast invasive carcinoma	Breast					70	Right	Sentinel lymph node biopsy plus axillary dissection
TCGA-AQ-A1H2-01	Stage IIIA	84	5	Stage IIIA	197		Positive	FEMALE	Positive				Negative	M0	Positive	N2	197	0	LumA		Positive				enrollment	T_Other	T2	LIVING	TCGA-AQ-A1H2-01	Squamous	C3-BRCA/Luminal	cluster 2	BRCA CIMP c7	BRCA nonbasal-like c8	BRCA nonbasal-like c7	miRNA cluster 6	cluster 1	mutation cluster 4	TCGA-AQ-A1H2	TCGA Breast Cancer (BRCA)	breast invasive carcinoma	Breast					84	Right Upper Outer Quadrant	Axillary lymph node dissection alone
TCGA-AQ-A1H3-01	Stage IIIC	49	2	Stage IIIC	138		Positive	FEMALE	Negative				Negative	M0	Positive	N3	138	0	LumA		Positive				enrollment	T_Other	T2	LIVING	TCGA-AQ-A1H3-01	BRCA-LUAD+	C3-BRCA/Luminal	cluster 4	BRCA CIMP c7	KIRC-like c1	BRCA nonbasal-like c7	miRNA cluster 5	cluster 6	mutation c1uster 9	TCGA-AQ-A1H3	TCGA Breast Cancer (BRCA)	breast invasive carcinoma	Breast					49	Right Upper Outer Quadrant	Sentinel lymph node biopsy plus axillary dissection
TCGA-AQ-A54N-01																													TCGA-AQ-A54N-01										TCGA-AQ-A54N	TCGA Breast Cancer (BRCA)	breast invasive carcinoma	Breast					51	Left Lower Inner Quadrant	Sentinel node biopsy alone
TCGA-AQ-A54O-01																													TCGA-AQ-A54O-01										TCGA-AQ-A54O	TCGA Breast Cancer (BRCA)	breast invasive carcinoma	Breast					51	Right Upper Outer Quadrant	Sentinel lymph node biopsy plus axillary dissection
TCGA-AQ-A7U7-01																													TCGA-AQ-A7U7-01										TCGA-AQ-A7U7	TCGA Breast Cancer (BRCA)	breast invasive carcinoma	Breast					55	Left	Sentinel lymph node biopsy plus axillary dissection
TCGA-AR-A0TP-01	Stage II	43	1	No_Conversion	2392		Positive	FEMALE	Negative	2	2	2	Negative	M0	Negative	N0	2392	0	Basal	Basal-like	Negative	Basal	-13	-11	enrollment	T_Other	T2	LIVING	TCGA-AR-A0TP-01	High	C4-BRCA/Basal	cluster 5	BRCA basal-like c8	BRCA basal-like c6	BRCA basal-like c8	miRNA cluster 7	cluster 3	mutation cluster 5	TCGA-AR-A0TP	TCGA Breast Cancer (BRCA)	breast invasive carcinoma	Breast					43	Left Upper Inner Quadrant	Sentinel lymph node biopsy plus axillary dissection
TCGA-AR-A0TQ-01	Stage III	27	3	No_Conversion	1500		Positive	FEMALE	Positive	1	1	4	Negative	M0	Positive	N1	1500	0	LumB	Luminal B	Negative	Her2	-2	-5	enrollment	T_Other	T3	LIVING	TCGA-AR-A0TQ-01	High	C3-BRCA/Luminal	cluster 4	BRCA CIMP c7	BRCA basal-like c6	BRCA nonbasal-like c7	miRNA cluster 4	cluster 4	mutation cluster 4	TCGA-AR-A0TQ	TCGA Breast Cancer (BRCA)	breast invasive carcinoma	Breast					27	Right Upper Outer Quadrant	Axillary lymph node dissection alone
TCGA-AR-A0TR-01	Stage II	68	1	No_Conversion	21	160	Positive	FEMALE	Negative	3	3	3	Negative	M0	Positive	N1	160	1	LumA	Luminal A	Positive	LumA/B	-12	-3	enrollment	T_Other	T2	DECEASED	TCGA-AR-A0TR-01	Iq	C3-BRCA/Luminal	cluster 2	BRCA non-CIMP c9	BRCA nonbasal-like c8	BRCA nonbasal-like c7	miRNA cluster 13	cluster 7	mutation cluster 4	TCGA-AR-A0TR	TCGA Breast Cancer (BRCA)	breast invasive carcinoma	Breast					68	Left	Sentinel lymph node biopsy plus axillary dissection
TCGA-AR-A0TS-01	Stage II	46	4	No_Conversion	1138		Negative	FEMALE	Negative	2	2	2	Negative	M0	Positive	N1	1138	0	Basal	Basal-like	Negative	Basal	-13	-12	enrollment	T_Other	T2	LIVING	TCGA-AR-A0TS-01	High	C4-BRCA/Basal	cluster 5	BRCA basal-like c8	BRCA basal-like c6	BRCA basal-like c8	miRNA c1uster 9	cluster 5	mutation cluster 5	TCGA-AR-A0TS	TCGA Breast Cancer (BRCA)	breast invasive carcinoma	Breast					46	Right	Sentinel lymph node biopsy plus axillary dissection
TCGA-AR-A0TT-01	Stage III	53	3	No_Conversion	1679		Positive	FEMALE	Negative	1	1	4	Negative	M0	Positive	N2	1679	0	LumB	Luminal B	Negative	LumA/B	-2	-5	enrollment	T_Other	T2	LIVING	TCGA-AR-A0TT-01	BRCA-LUAD+	C3-BRCA/Luminal	cluster 1	BRCA CIMP c7	BRCA nonbasal-like c8	BRCA nonbasal-like c7	miRNA cluster 4	cluster 4	mutation c1uster 9	TCGA-AR-A0TT	TCGA Breast Cancer (BRCA)	breast invasive carcinoma	Breast					53	Right Upper Outer Quadrant	Sentinel lymph node biopsy plus axillary dissection
TCGA-AR-A0TU-01	Stage II	35	4	No_Conversion	360		Negative	FEMALE	Negative				Negative	M0	Negative	N0	360	0	Basal	Basal-like	Negative	Basal	-13	-12	enrollment	T_Other	T2	LIVING	TCGA-AR-A0TU-01	High	C4-BRCA/Basal	cluster 5	BRCA basal-like c8	BRCA basal-like c6	BRCA basal-like c8			mutation c1uster 9	TCGA-AR-A0TU	TCGA Breast Cancer (BRCA)	breast invasive carcinoma	Breast					35	Right Lower Outer Quadrant	Sentinel lymph node biopsy plus axillary dissection
TCGA-AR-A0TV-01	Stage II	66	1	No_Conversion	904		Positive	FEMALE	Negative	1	1	4	Negative	M0	Negative	N0	904	0	LumB	Luminal B	Positive	LumA/B	-10	-5	enrollment	T_Other	T2	LIVING	TCGA-AR-A0TV-01	High	C3-BRCA/Luminal	cluster 4	BRCA CIMP c7	BRCA nonbasal-like c8	BRCA nonbasal-like c7	miRNA cluster 14	cluster 2	mutation cluster 8	TCGA-AR-A0TV	TCGA Breast Cancer (BRCA)	breast invasive carcinoma	Breast					66	Left Upper Outer Quadrant	Sentinel lymph node biopsy plus axillary dissection
TCGA-AR-A0TW-01	Stage III	50	4	No_Conversion	739		Positive	FEMALE	Negative				Negative	M0	Positive	N1	739	0	LumA	Luminal A	Positive	Basal	-2	-5	enrollment	T_Other	T3	LIVING	TCGA-AR-A0TW-01	High	C3-BRCA/Luminal	cluster 4	BRCA CIMP c7	BRCA nonbasal-like c8	BRCA nonbasal-like c7			mutation c1uster 9	TCGA-AR-A0TW	TCGA Breast Cancer (BRCA)	breast invasive carcinoma	Breast					50	Right Upper Outer Quadrant|Right Lower Outer Quadrant
TCGA-AR-A0TX-01	Stage II	64	1	No_Conversion	15		Positive	FEMALE	Positive	2	2	1	Negative	M0	Positive	N1	15	0	Her2	HER2-enriched	Positive	ReacII	-11	-5	enrollment	T1	T1	LIVING	TCGA-AR-A0TX-01	High	C3-BRCA/Luminal	cluster 1	Cluster 5	BRCA basal-like c6	BRCA nonbasal-like c7	miRNA cluster 6	cluster 1	mutation cluster 8	TCGA-AR-A0TX	TCGA Breast Cancer (BRCA)	breast invasive carcinoma	Breast					64	Left Upper Outer Quadrant	Axillary lymph node dissection alone
TCGA-AR-A0TY-01	Stage II	54	1	No_Conversion	544	1699	Positive	FEMALE	Negative	1	1	4	Negative	M0	Negative	N0	1699	1	LumB	Luminal B	Negative	LumA/B	-2	-5	enrollment	T_Other	T2	DECEASED	TCGA-AR-A0TY-01	Squamous	C3-BRCA/Luminal	cluster 4	BRCA CIMP c7	BRCA nonbasal-like c8	BRCA nonbasal-like c7	miRNA cluster 4	cluster 4	mutation cluster 12	TCGA-AR-A0TY	TCGA Breast Cancer (BRCA)	breast invasive carcinoma	Breast					54	Right Upper Outer Quadrant	Sentinel lymph node biopsy plus axillary dissection
TCGA-AR-A0TZ-01	Stage III	43	5	No_Conversion	1313		Positive	FEMALE	Negative	4	3	4	Negative	M0	Positive	N2	1313	0	LumA	Luminal B	Positive	ReacII	-10	-3	enrollment	T_Other	T2	LIVING	TCGA-AR-A0TZ-01	Kirc+	C3-BRCA/Luminal	cluster 3	BRCA CIMP c7	KIRC-like c1	BRCA nonbasal-like c7	miRNA cluster 14	cluster 2	mutation cluster 4	TCGA-AR-A0TZ	TCGA Breast Cancer (BRCA)	breast invasive carcinoma	Breast					43	Left Upper Outer Quadrant
TCGA-AR-A0U0-01	Stage II	73	1	No_Conversion	8		Negative	FEMALE	Negative				Negative	M0	Positive	N1	8	0	Basal	Basal-like	Negative	Basal	-13	-12	enrollment	T_Other	T2	LIVING	TCGA-AR-A0U0-01	Squamous	C3-BRCA/Luminal	cluster 1	BRCA CIMP c7	BRCA basal-like c6	BRCA basal-like c8			mutation cluster 3	TCGA-AR-A0U0	TCGA Breast Cancer (BRCA)	breast invasive carcinoma	Breast					73	Left Lower Inner Quadrant	Sentinel lymph node biopsy plus axillary dissection
TCGA-AR-A0U1-01	Stage II	36	1	No_Conversion	185		Negative	FEMALE	Negative	2	2	2	Negative	M0	Positive	N1	185	0	Basal	Basal-like	Negative	Basal	-13	0	enrollment	T_Other	T2	LIVING	TCGA-AR-A0U1-01	High	C4-BRCA/Basal	cluster 5	BRCA basal-like c8	BRCA basal-like c6		miRNA cluster 13	cluster 6	mutation cluster 5	TCGA-AR-A0U1	TCGA Breast Cancer (BRCA)	breast invasive carcinoma	Breast					36	Left Upper Outer Quadrant	Sentinel lymph node biopsy plus axillary dissection
TCGA-AR-A0U2-01	Stage III	47	5	No_Conversion	1608	2551	Positive	FEMALE	Negative				Negative	M0	Positive	N2	2551	1	LumB	Luminal B	Positive	ReacII	-10	-5	enrollment	T_Other	T2	DECEASED	TCGA-AR-A0U2-01	High	C3-BRCA/Luminal	cluster 2	BRCA CIMP c7	squamous c3	BRCA nonbasal-like c7	miRNA cluster 12	cluster 5	mutation cluster 5	TCGA-AR-A0U2	TCGA Breast Cancer (BRCA)	breast invasive carcinoma	Breast					47	Left Lower Outer Quadrant	Axillary lymph node dissection alone
TCGA-AR-A0U3-01	Stage II	59	4	No_Conversion	2263		Positive	FEMALE	Negative	4	3	4	Negative	M0	Positive	N1	2263	0	LumA	Luminal B	Positive	LumA/B	0	-3	enrollment	T_Other	T2	LIVING	TCGA-AR-A0U3-01	Squamous	C3-BRCA/Luminal	cluster 3	BRCA CIMP c7	BRCA nonbasal-like c8	BRCA nonbasal-like c7	miRNA cluster 6	cluster 7	mutation cluster 5	TCGA-AR-A0U3	TCGA Breast Cancer (BRCA)	breast invasive carcinoma	Breast					59	Left Upper Inner Quadrant|Left Upper Outer Quadrant	Sentinel lymph node biopsy plus axillary dissection
TCGA-AR-A0U4-01	Stage II	54	1	No_Conversion	1627		Negative	FEMALE	Negative	2	2	2	Negative	M0	Negative	N0	1627	0	Basal	Basal-like	Negative	ReacII	-13	-12	enrollment	T_Other	T2	LIVING	TCGA-AR-A0U4-01	High	C4-BRCA/Basal	cluster 5	BRCA basal-like c8	squamous c3	BRCA basal-like c8	miRNA cluster 12	cluster 5	mutation cluster 11	TCGA-AR-A0U4	TCGA Breast Cancer (BRCA)	breast invasive carcinoma	Breast					54	Left Upper Outer Quadrant	Sentinel lymph node biopsy plus axillary dissection
TCGA-AR-A1AH-01	Stage II	51	1	Stage IIB	2298		Positive	FEMALE	Negative	2	2	2	Negative	M0	Positive	N1	2298	0	Basal	Basal-like	Negative	Basal	-13	0	enrollment	T_Other	T2	LIVING	TCGA-AR-A1AH-01	High	C4-BRCA/Basal	cluster 5	BRCA basal-like c8	BRCA basal-like c6	BRCA basal-like c8	miRNA cluster 12	cluster 5	mutation cluster 5	TCGA-AR-A1AH	TCGA Breast Cancer (BRCA)	breast invasive carcinoma	Breast					51	Right Upper Inner Quadrant	Axillary lymph node dissection alone
TCGA-AR-A1AI-01	Stage II	47	1	Stage IIA	1881		Negative	FEMALE	Negative	2	2	2	Negative	M0	Negative	N0	1881	0	Basal	Basal-like	Negative	Basal	-13	-12	enrollment	T_Other	T2	LIVING	TCGA-AR-A1AI-01	High	C4-BRCA/Basal	cluster 5	BRCA basal-like c8	BRCA basal-like c6	BRCA basal-like c8	miRNA cluster 7	cluster 3	mutation cluster 5	TCGA-AR-A1AI	TCGA Breast Cancer (BRCA)	breast invasive carcinoma	Breast					47	Left Upper Outer Quadrant	Sentinel lymph node biopsy plus axillary dissection
TCGA-AR-A1AJ-01	Stage I	83	3	Stage I	1604		Positive	FEMALE	Negative	1	2	2	Negative	M0	Negative	N0	1604	0	Basal	Basal-like	Negative	ReacI	-13	-12	enrollment	T1	T1	LIVING	TCGA-AR-A1AJ-01	High	C4-BRCA/Basal	cluster 5	Low purity c2	BRCA basal-like c6	BRCA basal-like c8	miRNA cluster 4	cluster 4	mutation cluster 5	TCGA-AR-A1AJ	TCGA Breast Cancer (BRCA)	breast invasive carcinoma	Breast					83	Right	Sentinel lymph node biopsy plus axillary dissection
TCGA-AR-A1AK-01	Stage I	70	3	Stage I	1558		Positive	FEMALE	Negative	1	4	3	Negative	M0	Negative	N0	1558	0	LumA	Luminal A	Positive	ReacI	-5	0	enrollment	T1	T1	LIVING	TCGA-AR-A1AK-01	High	C3-BRCA/Luminal	cluster 1	BRCA non-CIMP c9	BRCA nonbasal-like c8	BRCA nonbasal-like c7	miRNA cluster 4	cluster 4	mutation c1uster 9	TCGA-AR-A1AK	TCGA Breast Cancer (BRCA)	breast invasive carcinoma	Breast					70	Right	Sentinel lymph node biopsy plus axillary dissection
TCGA-AR-A1AL-01	Stage III	60	2	Stage IIIA	1485		Positive	FEMALE	Negative	3	4	3	Negative	M0	Positive	N1	1485	0	LumA	Luminal A	Positive	ReacI	-4	0	enrollment	T_Other	T3	LIVING	TCGA-AR-A1AL-01	Iq	C3-BRCA/Luminal	cluster 2	BRCA non-CIMP c9	BRCA nonbasal-like c8	BRCA nonbasal-like c7	miRNA cluster 14	cluster 6	mutation cluster 1	TCGA-AR-A1AL	TCGA Breast Cancer (BRCA)	breast invasive carcinoma	Breast					60	Left Upper Inner Quadrant|Left Upper Outer Quadrant	Sentinel lymph node biopsy plus axillary dissection
TCGA-AR-A1AM-01																													TCGA-AR-A1AM-01	Iq			BRCA non-CIMP c9	BRCA nonbasal-like c8		miRNA cluster 4			TCGA-AR-A1AM	TCGA Breast Cancer (BRCA)	breast invasive carcinoma	Breast					52	Right Upper Outer Quadrant
TCGA-AR-A1AN-01	Stage II	46	1	Stage IIA	1329		Positive	FEMALE	Negative				Negative	M0	Negative	N0	1329	0	LumA	Luminal A	Positive		-5	-7	enrollment	T_Other	T2	LIVING	TCGA-AR-A1AN-01	High	C3-BRCA/Luminal	cluster 5	BRCA non-CIMP c9		BRCA nonbasal-like c7	miRNA cluster 7	cluster 6	mutation cluster 5	TCGA-AR-A1AN	TCGA Breast Cancer (BRCA)	breast invasive carcinoma	Breast					46	Right Upper Outer Quadrant	Sentinel lymph node biopsy plus axillary dissection
TCGA-AR-A1AO-01	Stage II	47	1	Stage IIA	1324		Positive	FEMALE	Negative	2	2	2	Negative	M0	Positive	N1	1324	0	Normal	Normal-like	Negative	Basal	-5	-8	enrollment	T1	T1	LIVING	TCGA-AR-A1AO-01	Quiet	C3-BRCA/Luminal	cluster 5	Low purity c2	BRCA basal-like c6	BRCA nonbasal-like c7	miRNA cluster 4	cluster 4	mutation c1uster 9	TCGA-AR-A1AO	TCGA Breast Cancer (BRCA)	breast invasive carcinoma	Breast					47	Left Upper Inner Quadrant	Sentinel lymph node biopsy plus axillary dissection
TCGA-AR-A1AP-01	Stage I	80	2	Stage I	1215		Positive	FEMALE	Negative	1	3	3	Negative	M0	Negative	N0	1215	0	LumA	Luminal A	Positive	LumA/B	0	0	enrollment	T1	T1	LIVING	TCGA-AR-A1AP-01	High	C3-BRCA/Luminal	cluster 4	BRCA CIMP c7	BRCA nonbasal-like c8	BRCA nonbasal-like c7	miRNA cluster 4	cluster 4	mutation cluster 5	TCGA-AR-A1AP	TCGA Breast Cancer (BRCA)	breast invasive carcinoma	Breast					80	Left Upper Outer Quadrant	Sentinel lymph node biopsy plus axillary dissection
TCGA-AR-A1AQ-01	Stage II	49	1	Stage IIA	1309		Negative	FEMALE	Negative	2	2	2	Negative	M0	Negative	N0	1309	0	Basal	Basal-like	Negative	Basal	-13	-12	enrollment	T_Other	T2	LIVING	TCGA-AR-A1AQ-01	High	C4-BRCA/Basal	cluster 5	BRCA basal-like c8	BRCA basal-like c6	BRCA basal-like c8	miRNA cluster 7	cluster 3	mutation cluster 5	TCGA-AR-A1AQ	TCGA Breast Cancer (BRCA)	breast invasive carcinoma	Breast					49	Right Upper Inner Quadrant|Right Upper Outer Quadrant	Sentinel lymph node biopsy plus axillary dissection
TCGA-AR-A1AR-01	Stage III	50	1	Stage IIIA		523	Negative	FEMALE	Negative				Negative	M0	Positive	N2	523	1	Basal	Basal-like	Negative		-13	0	enrollment	T1	T1	DECEASED	TCGA-AR-A1AR-01	High	C4-BRCA/Basal	cluster 5	BRCA basal-like c8		BRCA basal-like c8	miRNA cluster 12	cluster 5	mutation c1uster 9	TCGA-AR-A1AR	TCGA Breast Cancer (BRCA)	breast invasive carcinoma	Breast					50	Left Lower Inner Quadrant	Axillary lymph node dissection alone
TCGA-AR-A1AS-01	Stage II	54	3	Stage IIB	1242		Positive	FEMALE	Negative	3	3	3	Negative	M0	Positive	N1	1242	0	LumA	Luminal A	Positive	LumA	-7	-3	enrollment	T_Other	T2	LIVING	TCGA-AR-A1AS-01	Iq	C3-BRCA/Luminal	cluster 2	BRCA non-CIMP c9	BRCA nonbasal-like c8	BRCA nonbasal-like c7	miRNA cluster 4	cluster 4	mutation cluster 2	TCGA-AR-A1AS	TCGA Breast Cancer (BRCA)	breast invasive carcinoma	Breast					54	Left Upper Inner Quadrant	Axillary lymph node dissection alone
TCGA-AR-A1AT-01	Stage II	62		Stage IIA		1272	Positive	FEMALE	Positive				Negative	M0	Negative	N0	1272	1		HER2-enriched	Positive	Her2	-11	-5	enrollment	T_Other	T2	DECEASED	TCGA-AR-A1AT-01			cluster 1	BRCA CIMP c7	BRCA basal-like c6		miRNA cluster 4	cluster 4	mutation c1uster 9	TCGA-AR-A1AT	TCGA Breast Cancer (BRCA)	breast invasive carcinoma	Breast					62	Left Upper Outer Quadrant	Sentinel lymph node biopsy plus axillary dissection
TCGA-AR-A1AU-01	Stage III	39	4	Stage IIIA	1409		Positive	FEMALE	Negative	3	4	3	Negative	M0	Positive	N2	1409	0	LumA	Luminal A	Positive	ReacI	-3	-7	enrollment	T_Other	T2	LIVING	TCGA-AR-A1AU-01	Kirc+	C3-BRCA/Luminal	cluster 2	BRCA non-CIMP c9	BRCA nonbasal-like c8	BRCA nonbasal-like c7	miRNA cluster 4	cluster 6	mutation c1uster 9	TCGA-AR-A1AU	TCGA Breast Cancer (BRCA)	breast invasive carcinoma	Breast					39	Right Upper Inner Quadrant|Right Upper Outer Quadrant	Sentinel lymph node biopsy plus axillary dissection
TCGA-AR-A1AV-01	Stage II	68	3	Stage IIB	1295		Positive	MALE	Negative	4	5	4	Negative	M0	Positive	N1	1295	0	LumA	Luminal B	Positive	LumA/B	-2	-5	enrollment	T_Other	T2	LIVING	TCGA-AR-A1AV-01	High	C3-BRCA/Luminal	cluster 3	BRCA CIMP c7	BRCA nonbasal-like c8	BRCA nonbasal-like c7	miRNA c1uster 10	cluster 7	mutation cluster 4	TCGA-AR-A1AV	TCGA Breast Cancer (BRCA)	breast invasive carcinoma	Breast					68	Left	Axillary lymph node dissection alone
TCGA-AR-A1AW-01	Stage II	65	3	Stage IIA	1072		Positive	FEMALE	Negative	2	2	3	Negative	M0	Negative	N0	1072	0	LumB	Luminal A	Positive	ReacII	-12	-3	enrollment	T_Other	T2	LIVING	TCGA-AR-A1AW-01	High	C3-BRCA/Luminal	cluster 1	BRCA CIMP c7	BRCA nonbasal-like c8	BRCA nonbasal-like c7	miRNA cluster 7	cluster 3	mutation cluster 3	TCGA-AR-A1AW	TCGA Breast Cancer (BRCA)	breast invasive carcinoma	Breast					65	Left Upper Inner Quadrant	Sentinel lymph node biopsy plus axillary dissection
TCGA-AR-A1AX-01	Stage I	64	4	Stage I	1103		Positive	FEMALE	Positive	3	1	3	Negative	M0	Negative	N0	1103	0	LumA	Luminal A	Positive	ReacII	0	-5	enrollment	T1	T1	LIVING	TCGA-AR-A1AX-01	Squamous	C5-KIRC	cluster 5	Low purity c2	KIRC-like c1	BRCA nonbasal-like c7	miRNA cluster 4	cluster 6	mutation c1uster 9	TCGA-AR-A1AX	TCGA Breast Cancer (BRCA)	breast invasive carcinoma	Breast					64	Left Upper Inner Quadrant|Left Upper Outer Quadrant	Sentinel lymph node biopsy plus axillary dissection
TCGA-AR-A1AY-01	Stage I	65	1	Stage I	614		Negative	FEMALE	Negative	2	2	2	Negative	M0	Negative	N0	614	0	Basal	Basal-like	Negative	Basal	-13	-12	enrollment	T1	T1	LIVING	TCGA-AR-A1AY-01	High	C4-BRCA/Basal	cluster 5	BRCA basal-like c8	BRCA basal-like c6	BRCA basal-like c8	miRNA cluster 12	cluster 5	mutation cluster 5	TCGA-AR-A1AY	TCGA Breast Cancer (BRCA)	breast invasive carcinoma	Breast					65	Left Upper Outer Quadrant	Sentinel lymph node biopsy plus axillary dissection
TCGA-AR-A24H-01	Stage II	65	2	Stage IIA	3333		Positive	FEMALE	Negative				Negative	M0	Negative	N0	3333	0	LumB		Positive				enrollment	T_Other	T2	LIVING	TCGA-AR-A24H-01	Squamous	C3-BRCA/Luminal	cluster 3	BRCA CIMP c7		BRCA nonbasal-like c7	miRNA cluster 13		mutation c1uster 9	TCGA-AR-A24H	TCGA Breast Cancer (BRCA)	breast invasive carcinoma	Breast					65	Right Lower Inner Quadrant|Right Lower Outer Quadrant	Sentinel lymph node biopsy plus axillary dissection
TCGA-AR-A24K-01	Stage II	46	3	Stage IIA	1548		Positive	FEMALE	Negative				Negative	M0	Negative	N0	1548	0	LumB		Positive				enrollment	T_Other	T2	LIVING	TCGA-AR-A24K-01	BRCA-LUAD+	C3-BRCA/Luminal	cluster 4	BRCA CIMP c7	BRCA nonbasal-like c8	BRCA nonbasal-like c7	miRNA cluster 13		mutation cluster 3	TCGA-AR-A24K	TCGA Breast Cancer (BRCA)	breast invasive carcinoma	Breast					46	Left Upper Outer Quadrant	Sentinel lymph node biopsy plus axillary dissection
TCGA-AR-A24L-01	Stage II	26	5	Stage IIB	2221		Positive	FEMALE	Negative				Negative	M0	Positive	N1	2221	0	LumA		Positive				enrollment	T_Other	T2	LIVING	TCGA-AR-A24L-01	High	C3-BRCA/Luminal	cluster 2	BRCA non-CIMP c9	BRCA nonbasal-like c8	BRCA nonbasal-like c7	miRNA cluster 4	cluster 4	mutation c1uster 9	TCGA-AR-A24L	TCGA Breast Cancer (BRCA)	breast invasive carcinoma	Breast					26	Right	Sentinel lymph node biopsy plus axillary dissection
TCGA-AR-A24M-01	Stage III	38	3	Stage IIIA	1990		Positive	FEMALE	Negative				Negative	M0	Positive	N2	1990	0	LumA		Positive				enrollment	T_Other	T2	LIVING	TCGA-AR-A24M-01	Iq	C3-BRCA/Luminal	cluster 4	BRCA non-CIMP c9	BRCA nonbasal-like c8	BRCA nonbasal-like c7	miRNA c1uster 10	cluster 7	mutation cluster 4	TCGA-AR-A24M	TCGA Breast Cancer (BRCA)	breast invasive carcinoma	Breast					38	Left Upper Outer Quadrant	Sentinel lymph node biopsy plus axillary dissection
TCGA-AR-A24N-01	Stage I	54	2	Stage I	2074		Positive	FEMALE	Negative				Negative	M0	Negative	N0	2074	0	LumB		Positive				enrollment	T1	T1	LIVING	TCGA-AR-A24N-01	BRCA-LUAD+	C3-BRCA/Luminal	cluster 3	BRCA CIMP c7	BRCA nonbasal-like c8	BRCA nonbasal-like c7	miRNA cluster 12	cluster 3	mutation c1uster 9	TCGA-AR-A24N	TCGA Breast Cancer (BRCA)	breast invasive carcinoma	Breast					54	Left Upper Inner Quadrant	Sentinel lymph node biopsy plus axillary dissection
TCGA-AR-A24O-01	Stage III	43	2	Stage IIIA	1997		Positive	FEMALE	Negative				Negative	M0	Positive	N2	1997	0	LumA		Positive				enrollment	T_Other	T3	LIVING	TCGA-AR-A24O-01	Squamous	C3-BRCA/Luminal	cluster 1	BRCA non-CIMP c9	BRCA nonbasal-like c8	BRCA nonbasal-like c7	miRNA c1uster 10	cluster 7	mutation cluster 4	TCGA-AR-A24O	TCGA Breast Cancer (BRCA)	breast invasive carcinoma	Breast					43	Left
TCGA-AR-A24P-01	Stage I	47	2	Stage I	26		Positive	FEMALE	Negative				Negative	M0	Negative	N0	26	0	LumA		Positive				enrollment	T1	T1	LIVING	TCGA-AR-A24P-01	Iq	C3-BRCA/Luminal	cluster 4	BRCA CIMP c7	BRCA nonbasal-like c8	BRCA nonbasal-like c7	miRNA cluster 14	cluster 2	mutation cluster 5	TCGA-AR-A24P	TCGA Breast Cancer (BRCA)	breast invasive carcinoma	Breast					47	Left Upper Outer Quadrant	Sentinel lymph node biopsy plus axillary dissection
TCGA-AR-A24Q-01	Stage II	49	1	Stage IIB	2008		Positive	FEMALE	Negative				Negative	M0	Negative	N0	2008	0	Basal		Negative				enrollment	T_Other	T3	LIVING	TCGA-AR-A24Q-01	High	C4-BRCA/Basal	cluster 5	BRCA basal-like c8	KIRC-like c1	BRCA basal-like c8	miRNA c1uster 9	cluster 6	mutation cluster 2	TCGA-AR-A24Q	TCGA Breast Cancer (BRCA)	breast invasive carcinoma	Breast					49	Left Upper Inner Quadrant	Sentinel lymph node biopsy plus axillary dissection
TCGA-AR-A24R-01	Stage III	45	5	Stage IIIA	1745		Positive	FEMALE	Negative				Negative	M0	Positive	N2	1745	0	LumB		Positive				enrollment	T1	T1	LIVING	TCGA-AR-A24R-01	BRCA-LUAD+	C3-BRCA/Luminal	cluster 3	BRCA CIMP c7	BRCA nonbasal-like c8	BRCA nonbasal-like c7	miRNA cluster 12	cluster 5	mutation c1uster 9	TCGA-AR-A24R	TCGA Breast Cancer (BRCA)	breast invasive carcinoma	Breast					45	Right Upper Inner Quadrant|Right Upper Outer Quadrant	Sentinel lymph node biopsy plus axillary dissection
TCGA-AR-A24S-01	Stage I	61	1	Stage I	1888		Positive	FEMALE	Negative				Negative	M0	Negative	N0	1888	0	LumB		Positive				enrollment	T1	T1	LIVING	TCGA-AR-A24S-01	Squamous	C3-BRCA/Luminal	cluster 2	Cluster 5	BRCA nonbasal-like c8	BRCA nonbasal-like c7	miRNA cluster 4	cluster 4	mutation cluster 2	TCGA-AR-A24S	TCGA Breast Cancer (BRCA)	breast invasive carcinoma	Breast					61	Right Lower Outer Quadrant	Sentinel lymph node biopsy plus axillary dissection
TCGA-AR-A24T-01	Stage III	46	2	Stage IIIC	1620		Positive	FEMALE	Negative				Negative	M0	Positive	N3	1620	0	LumA		Positive				enrollment	T_Other	T3	LIVING	TCGA-AR-A24T-01	Iq	C3-BRCA/Luminal	cluster 4	BRCA CIMP c7	BRCA nonbasal-like c8	BRCA nonbasal-like c7	miRNA cluster 14	cluster 2	mutation cluster 4	TCGA-AR-A24T	TCGA Breast Cancer (BRCA)	breast invasive carcinoma	Breast					46	Right Upper Outer Quadrant	Sentinel lymph node biopsy plus axillary dissection
TCGA-AR-A24U-01	Stage II	47	4	Stage IIA	1623		Negative	FEMALE	Positive				Negative	M0	Positive	N1	1623	0	Her2		Negative				enrollment	T1	T1	LIVING	TCGA-AR-A24U-01	High	C3-BRCA/Luminal	cluster 1	BRCA non-CIMP c9	BRCA basal-like c6	BRCA nonbasal-like c7	miRNA cluster 7	cluster 7	mutation c1uster 9	TCGA-AR-A24U	TCGA Breast Cancer (BRCA)	breast invasive carcinoma	Breast					47	Left Upper Outer Quadrant|Left Lower Outer Quadrant	Sentinel lymph node biopsy plus axillary dissection
TCGA-AR-A24V-01	Stage II	52	5	Stage IIB	1648		Positive	FEMALE	Negative				Negative	M0	Positive	N1	1648	0	LumA		Positive				enrollment	T_Other	T2	LIVING	TCGA-AR-A24V-01	Squamous	C3-BRCA/Luminal	cluster 4	BRCA CIMP c7	BRCA nonbasal-like c8	BRCA nonbasal-like c7	miRNA cluster 4	cluster 4	mutation c1uster 9	TCGA-AR-A24V	TCGA Breast Cancer (BRCA)	breast invasive carcinoma	Breast					52	Right Upper Outer Quadrant	Sentinel lymph node biopsy plus axillary dissection
TCGA-AR-A24W-01			3																LumA										TCGA-AR-A24W-01	BRCA-LUAD+	C3-BRCA/Luminal	cluster 1	BRCA non-CIMP c9	BRCA nonbasal-like c8	BRCA nonbasal-like c7	miRNA cluster 14	cluster 6	mutation c1uster 9	TCGA-AR-A24W	TCGA Breast Cancer (BRCA)	breast invasive carcinoma	Breast					55	Right Lower Inner Quadrant	Sentinel lymph node biopsy plus axillary dissection
TCGA-AR-A24X-01	Stage II	52	2	Stage IIA	1465		Positive	FEMALE	Negative				Negative	M0	Negative	N0	1465	0	LumA		Positive				enrollment	T_Other	T2	LIVING	TCGA-AR-A24X-01	Iq	C3-BRCA/Luminal	cluster 4	BRCA CIMP c7	BRCA nonbasal-like c8	BRCA nonbasal-like c7	miRNA cluster 14	cluster 2	mutation cluster 4	TCGA-AR-A24X	TCGA Breast Cancer (BRCA)	breast invasive carcinoma	Breast					52	Right Upper Inner Quadrant	Sentinel lymph node biopsy plus axillary dissection
TCGA-AR-A24Z-01	Stage II	57	3	Stage IIA	1574		Positive	FEMALE	Negative				Negative	M0	Negative	N0	1574	0	LumB		Positive				enrollment	T_Other	T2	LIVING	TCGA-AR-A24Z-01	High	C3-BRCA/Luminal	cluster 4	BRCA CIMP c7	BRCA nonbasal-like c8	BRCA nonbasal-like c7	miRNA cluster 6		mutation c1uster 9	TCGA-AR-A24Z	TCGA Breast Cancer (BRCA)	breast invasive carcinoma	Breast					57	Left Upper Outer Quadrant	Sentinel lymph node biopsy plus axillary dissection
TCGA-AR-A250-01	Stage II	58	3	Stage IIA	1707		Positive	FEMALE	Positive				Negative	M0	Negative	N0	1707	0	LumB		Negative				enrollment	T_Other	T2	LIVING	TCGA-AR-A250-01	BRCA-LUAD+	C3-BRCA/Luminal	cluster 3	BRCA CIMP c7	BRCA nonbasal-like c8	BRCA nonbasal-like c7	miRNA cluster 4	cluster 4	mutation c1uster 9	TCGA-AR-A250	TCGA Breast Cancer (BRCA)	breast invasive carcinoma	Breast					58	Left Upper Outer Quadrant	Sentinel lymph node biopsy plus axillary dissection
TCGA-AR-A251-01	Stage III	51	1	Stage IIIA	1373		Positive	FEMALE	Negative				Negative	M0	Positive	N2	1373	0	Basal		Negative				enrollment	T_Other	T2	LIVING	TCGA-AR-A251-01	Squamous	C4-BRCA/Basal	cluster 5	BRCA basal-like c8	KIRC-like c1	BRCA basal-like c8	miRNA cluster 7		mutation c1uster 9	TCGA-AR-A251	TCGA Breast Cancer (BRCA)	breast invasive carcinoma	Breast					51	Left Upper Outer Quadrant	Sentinel lymph node biopsy plus axillary dissection
TCGA-AR-A252-01	Stage I	50	3	Stage I	1236		Positive	FEMALE	Negative				Negative	M0	Negative	N0	1236	0	LumA		Positive				enrollment	T1	T1	LIVING	TCGA-AR-A252-01	Kirc+	C3-BRCA/Luminal	cluster 1	BRCA non-CIMP c9	BRCA nonbasal-like c8	BRCA nonbasal-like c7	miRNA cluster 6	cluster 1	mutation c1uster 9	TCGA-AR-A252	TCGA Breast Cancer (BRCA)	breast invasive carcinoma	Breast					50	Left Upper Outer Quadrant|Left Lower Outer Quadrant	Sentinel lymph node biopsy plus axillary dissection
TCGA-AR-A254-01	Stage III	50	3	Stage IIIA	1212		Positive	FEMALE	Positive				Negative	M0	Positive	N2	1212	0	Her2		Positive				enrollment	T_Other	T2	LIVING	TCGA-AR-A254-01	High	C3-BRCA/Luminal	cluster 4	BRCA CIMP c7	BRCA basal-like c6	BRCA nonbasal-like c7	miRNA cluster 4		mutation cluster 5	TCGA-AR-A254	TCGA Breast Cancer (BRCA)	breast invasive carcinoma	Breast					50	Left Upper Inner Quadrant|Left Lower Inner Quadrant	Sentinel lymph node biopsy plus axillary dissection
TCGA-AR-A255-01	Stage I	62	5	Stage I	1058		Positive	FEMALE	Positive				Negative	M0	Negative	N0	1058	0	LumA		Positive				enrollment	T1	T1	LIVING	TCGA-AR-A255-01	High	C3-BRCA/Luminal	cluster 3	BRCA CIMP c7	KIRC-like c1	BRCA nonbasal-like c7	miRNA cluster 13		mutation cluster 4	TCGA-AR-A255	TCGA Breast Cancer (BRCA)	breast invasive carcinoma	Breast					62	Right Lower Inner Quadrant	Sentinel lymph node biopsy plus axillary dissection
TCGA-AR-A256-01	Stage II	45	1	Stage IIA	2854	2854	Negative	FEMALE	Negative				Negative	M0	Negative	N0	2854	1	Basal		Negative				enrollment	T_Other	T2	DECEASED	TCGA-AR-A256-01	High	C4-BRCA/Basal	cluster 5	BRCA basal-like c8	BRCA basal-like c6	BRCA basal-like c8	miRNA cluster 12		mutation cluster 5	TCGA-AR-A256	TCGA Breast Cancer (BRCA)	breast invasive carcinoma	Breast					45	Right Lower Inner Quadrant	Sentinel lymph node biopsy plus axillary dissection
TCGA-AR-A2LE-01																			LumA										TCGA-AR-A2LE-01	Iq	C3-BRCA/Luminal		BRCA non-CIMP c9	KIRC-like c1	BRCA nonbasal-like c7	miRNA c1uster 10			TCGA-AR-A2LE	TCGA Breast Cancer (BRCA)	breast invasive carcinoma	Breast					69	Right	Sentinel node biopsy alone
TCGA-AR-A2LH-01																			Normal										TCGA-AR-A2LH-01	Quiet	C3-BRCA/Luminal		BRCA non-CIMP c9	BRCA basal-like c6	BRCA nonbasal-like c7	miRNA cluster 5			TCGA-AR-A2LH	TCGA Breast Cancer (BRCA)	breast invasive carcinoma	Breast					55	Right Upper Outer Quadrant	Sentinel lymph node biopsy plus axillary dissection
TCGA-AR-A2LJ-01																													TCGA-AR-A2LJ-01	Iq			BRCA non-CIMP c9	BRCA nonbasal-like c8		miRNA cluster 4			TCGA-AR-A2LJ	TCGA Breast Cancer (BRCA)	breast invasive carcinoma	Breast					40	Left	Sentinel lymph node biopsy plus axillary dissection
TCGA-AR-A2LK-01																			LumB										TCGA-AR-A2LK-01	BRCA-LUAD+	C3-BRCA/Luminal		BRCA CIMP c7	BRCA nonbasal-like c8	BRCA nonbasal-like c7	miRNA cluster 4			TCGA-AR-A2LK	TCGA Breast Cancer (BRCA)	breast invasive carcinoma	Breast					62	Right Upper Outer Quadrant|Right Lower Outer Quadrant	Sentinel lymph node biopsy plus axillary dissection
TCGA-AR-A2LL-01																			LumB										TCGA-AR-A2LL-01	High	C3-BRCA/Luminal		BRCA CIMP c7	BRCA nonbasal-like c8	BRCA nonbasal-like c7	miRNA cluster 14			TCGA-AR-A2LL	TCGA Breast Cancer (BRCA)	breast invasive carcinoma	Breast					70	Left	Sentinel lymph node biopsy plus axillary dissection
TCGA-AR-A2LM-01																			LumA										TCGA-AR-A2LM-01	Iq	C3-BRCA/Luminal		BRCA non-CIMP c9	BRCA nonbasal-like c8	BRCA nonbasal-like c7	miRNA cluster 12			TCGA-AR-A2LM	TCGA Breast Cancer (BRCA)	breast invasive carcinoma	Breast					49	Right	Sentinel lymph node biopsy plus axillary dissection
TCGA-AR-A2LN-01																			LumA										TCGA-AR-A2LN-01	BRCA-LUAD+	C3-BRCA/Luminal		BRCA non-CIMP c9	KIRC-like c1	BRCA nonbasal-like c7	miRNA cluster 5			TCGA-AR-A2LN	TCGA Breast Cancer (BRCA)	breast invasive carcinoma	Breast					65	Right Upper Outer Quadrant	Sentinel lymph node biopsy plus axillary dissection
TCGA-AR-A2LO-01																			LumA										TCGA-AR-A2LO-01	BRCA-LUAD+	C3-BRCA/Luminal		BRCA non-CIMP c9	BRCA nonbasal-like c8	BRCA nonbasal-like c7	miRNA cluster 4			TCGA-AR-A2LO	TCGA Breast Cancer (BRCA)	breast invasive carcinoma	Breast					46	Left Lower Outer Quadrant	Sentinel lymph node biopsy plus axillary dissection
TCGA-AR-A2LQ-01																			Normal										TCGA-AR-A2LQ-01	Quiet	C3-BRCA/Luminal		BRCA non-CIMP c9	KIRC-like c1	BRCA nonbasal-like c7	miRNA cluster 5			TCGA-AR-A2LQ	TCGA Breast Cancer (BRCA)	breast invasive carcinoma	Breast					59	Right Upper Inner Quadrant|Right Upper Outer Quadrant	Sentinel lymph node biopsy plus axillary dissection
TCGA-AR-A2LR-01																			Basal										TCGA-AR-A2LR-01	High	C4-BRCA/Basal		BRCA basal-like c8	KIRC-like c1	BRCA basal-like c8	miRNA cluster 5			TCGA-AR-A2LR	TCGA Breast Cancer (BRCA)	breast invasive carcinoma	Breast					49	Right	Sentinel lymph node biopsy plus axillary dissection
TCGA-AR-A5QM-01																													TCGA-AR-A5QM-01										TCGA-AR-A5QM	TCGA Breast Cancer (BRCA)	breast invasive carcinoma	Breast					62	Left	Sentinel lymph node biopsy plus axillary dissection
TCGA-AR-A5QN-01																													TCGA-AR-A5QN-01										TCGA-AR-A5QN	TCGA Breast Cancer (BRCA)	breast invasive carcinoma	Breast					68	Left	Axillary lymph node dissection alone
TCGA-AR-A5QP-01																													TCGA-AR-A5QP-01										TCGA-AR-A5QP	TCGA Breast Cancer (BRCA)	breast invasive carcinoma	Breast					54	Left	Sentinel lymph node biopsy plus axillary dissection
TCGA-AR-A5QQ-01																													TCGA-AR-A5QQ-01										TCGA-AR-A5QQ	TCGA Breast Cancer (BRCA)	breast invasive carcinoma	Breast					68	Right	Axillary lymph node dissection alone
TCGA-B6-A0I1-01																			Basal										TCGA-B6-A0I1-01	High			BRCA basal-like c8		BRCA basal-like c8	miRNA cluster 4			TCGA-B6-A0I1	TCGA Breast Cancer (BRCA)	breast invasive carcinoma	Breast	NO	NO			73	Left Upper Outer Quadrant	Axillary lymph node dissection alone
TCGA-B6-A0I2-01	Stage IA	45	3	Stage I	4360			FEMALE	Negative	2	2	2	Negative	M0	Negative	N0	4360	0	Basal	Basal-like		ReacII	-13	-12	followup	T1	T1	LIVING	TCGA-B6-A0I2-01	High	C4-BRCA/Basal	cluster 5	BRCA basal-like c8	KIRC-like c1	BRCA basal-like c8	miRNA cluster 7	cluster 3	mutation cluster 5	TCGA-B6-A0I2	TCGA Breast Cancer (BRCA)	breast invasive carcinoma	Breast					45	Left Upper Outer Quadrant|Left	Axillary lymph node dissection alone
TCGA-B6-A0I5-01	Stage IIB	49	2	No_Conversion	4549		Positive	FEMALE	Negative				Negative	M0	Positive	N1	4549	0	LumA	Luminal A	Positive		-5	-3	followup	T_Other	T2	LIVING	TCGA-B6-A0I5-01	BRCA-LUAD+	C3-BRCA/Luminal	cluster 1	BRCA non-CIMP c9		BRCA nonbasal-like c7	miRNA cluster 12	cluster 6	mutation cluster 4	TCGA-B6-A0I5	TCGA Breast Cancer (BRCA)	breast invasive carcinoma	Breast					49	Right Lower Inner Quadrant	Axillary lymph node dissection alone
TCGA-B6-A0I6-01	Stage IIA	49		No_Conversion	991	997	Negative	FEMALE					Negative	M0	Positive	N1	997	1	Basal	Basal-like	Negative	Basal	-13	0	followup	T1	T1	DECEASED	TCGA-B6-A0I6-01		C4-BRCA/Basal	cluster 5	BRCA basal-like c8	BRCA basal-like c6	BRCA basal-like c8	miRNA cluster 4	cluster 4	mutation c1uster 9	TCGA-B6-A0I6	TCGA Breast Cancer (BRCA)	breast invasive carcinoma	Breast	NO	NO	NO		49	Left Upper Outer Quadrant|Left	Axillary lymph node dissection alone
TCGA-B6-A0I8-01		46		No_Conversion	749	749		FEMALE					Negative	M0	Negative	N0	749	1	LumA	Luminal A		Her2	0	-3	followup	T1	T1	DECEASED	TCGA-B6-A0I8-01		C3-BRCA/Luminal	cluster 2	BRCA non-CIMP c9	BRCA nonbasal-like c8	BRCA nonbasal-like c7	miRNA cluster 4	cluster 4	mutation c1uster 9	TCGA-B6-A0I8	TCGA Breast Cancer (BRCA)	breast invasive carcinoma	Breast	YES	YES	YES		46	Right Upper Inner Quadrant|Right	No axillary staging
TCGA-B6-A0I9-01	Stage IV	62	5	No_Conversion	369	369	Indeterminate	FEMALE	Positive	1	1	1	Positive	M1	Negative	N0	369	1	Her2	HER2-enriched	Positive	Her2	-2	-5	followup	T_Other	T3	DECEASED	TCGA-B6-A0I9-01	BRCA-LUAD+	C3-BRCA/Luminal	cluster 4	BRCA CIMP c7	BRCA basal-like c6	BRCA nonbasal-like c7	miRNA cluster 4	cluster 4	mutation cluster 5	TCGA-B6-A0I9	TCGA Breast Cancer (BRCA)	breast invasive carcinoma	Breast					62	Left Lower Outer Quadrant|Left	No axillary staging
TCGA-B6-A0IA-01	Stage IIA	51	4	Stage IIA	6718		Positive	FEMALE	Negative				Negative	M0	Negative	N0	6718	0	LumA	Luminal A	Positive		-12	-3	followup	T_Other	T2	LIVING	TCGA-B6-A0IA-01	BRCA-LUAD+	C3-BRCA/Luminal	cluster 2	BRCA non-CIMP c9		BRCA nonbasal-like c7	miRNA cluster 12	cluster 4	mutation c1uster 9	TCGA-B6-A0IA	TCGA Breast Cancer (BRCA)	breast invasive carcinoma	Breast					51	Right	Axillary lymph node dissection alone
TCGA-B6-A0IB-01	Stage IV	64	4	No_Conversion	3941	3941	Positive	FEMALE	Negative	1	3	4	Positive	M1	Positive	N3	3941	1	LumB	Luminal B	Positive	LumA/B	0	-3	followup	T_Other	T3	DECEASED	TCGA-B6-A0IB-01	BRCA-LUAD+	C3-BRCA/Luminal	cluster 4	BRCA CIMP c7	BRCA nonbasal-like c8	BRCA nonbasal-like c7	miRNA cluster 6	cluster 1	mutation c1uster 9	TCGA-B6-A0IB	TCGA Breast Cancer (BRCA)	breast invasive carcinoma	Breast			NO		64	Right Upper Inner Quadrant|Right	Axillary lymph node dissection alone
TCGA-B6-A0IC-01		90	2	No_Conversion	1542	1542	Positive	FEMALE	Negative						Negative	N0	1542	1	LumA	Luminal B	Positive		-12	-3	followup	T_Other	T2	DECEASED	TCGA-B6-A0IC-01	Kirc+	C3-BRCA/Luminal	cluster 2	BRCA non-CIMP c9		BRCA nonbasal-like c7	miRNA cluster 14	cluster 2	mutation cluster 4	TCGA-B6-A0IC	TCGA Breast Cancer (BRCA)	breast invasive carcinoma	Breast					90	Right	No axillary staging
TCGA-B6-A0IE-01		38	3	No_Conversion	1998	1998	Negative	FEMALE	Negative				Negative	M0	Positive	N1	1998	1	LumA	Normal-like	Negative		-2	-3	followup		TX	DECEASED	TCGA-B6-A0IE-01	Kirc+	C3-BRCA/Luminal	cluster 1	BRCA non-CIMP c9		BRCA nonbasal-like c7	miRNA cluster 4	cluster 4	mutation cluster 3	TCGA-B6-A0IE	TCGA Breast Cancer (BRCA)	breast invasive carcinoma	Breast	YES	YES	NO		38	Left Upper Outer Quadrant|Left	Axillary lymph node dissection alone
TCGA-B6-A0IG-01	Stage IIB	50		No_Conversion	4456	4456	Positive	FEMALE					Negative	M0	Positive	N1	4456	1	LumA	Luminal A	Positive	Her2	-2	0	followup	T_Other	T2	DECEASED	TCGA-B6-A0IG-01	Squamous	C3-BRCA/Luminal	cluster 4	BRCA CIMP c7	BRCA basal-like c6	BRCA nonbasal-like c7	miRNA cluster 6	cluster 7	mutation cluster 12	TCGA-B6-A0IG	TCGA Breast Cancer (BRCA)	breast invasive carcinoma	Breast					50	Left	Axillary lymph node dissection alone
TCGA-B6-A0IH-01	Stage IIIA	81	2	Stage IIIA		3418	Positive	FEMALE	Negative				Negative	M0	Positive	N1	3418	1	LumA	Luminal A	Positive		-5	-7	followup	T_Other	T3	DECEASED	TCGA-B6-A0IH-01	BRCA-LUAD+	C3-BRCA/Luminal	cluster 4	BRCA non-CIMP c9		BRCA nonbasal-like c7	miRNA cluster 13	cluster 6	mutation c1uster 9	TCGA-B6-A0IH	TCGA Breast Cancer (BRCA)	breast invasive carcinoma	Breast					81	Left Upper Outer Quadrant|Left	Axillary lymph node dissection alone
TCGA-B6-A0IJ-01	Stage IIB	42	3	Stage IIB	5383		Positive	FEMALE	Negative	2	2	2	Negative	M0	Negative	N0	5383	0	Basal	Basal-like	Positive	Basal	-13	-12	followup	T_Other	T3	LIVING	TCGA-B6-A0IJ-01	High	C4-BRCA/Basal	cluster 5	BRCA basal-like c8	squamous c3	BRCA basal-like c8	miRNA cluster 12	cluster 5	mutation cluster 5	TCGA-B6-A0IJ	TCGA Breast Cancer (BRCA)	breast invasive carcinoma	Breast					42	Right Upper Outer Quadrant|Right	Axillary lymph node dissection alone
TCGA-B6-A0IK-01	Stage IIIB	63	5	No_Conversion	571	571	Negative	FEMALE	Negative	1	1	1	Negative	M0	Positive	N1	571	1	Her2	HER2-enriched	Negative	ReacII	-11	-5	followup	T_Other	T4	DECEASED	TCGA-B6-A0IK-01	Squamous	C3-BRCA/Luminal	cluster 4	BRCA CIMP c7	KIRC-like c1	BRCA nonbasal-like c7	miRNA cluster 4	cluster 4	mutation cluster 3	TCGA-B6-A0IK	TCGA Breast Cancer (BRCA)	breast invasive carcinoma	Breast	YES	YES	YES		63	Left
TCGA-B6-A0IM-01	Stage IIB	75	4	Stage IIB	3836		Positive	FEMALE	Negative				Negative	M0	Negative	N0	3836	0	LumA	Luminal B	Positive		-10	-3	followup	T_Other	T3	LIVING	TCGA-B6-A0IM-01	BRCA-LUAD+	C3-BRCA/Luminal	cluster 4	BRCA CIMP c7		BRCA nonbasal-like c7	miRNA cluster 4	cluster 4	mutation c1uster 9	TCGA-B6-A0IM	TCGA Breast Cancer (BRCA)	breast invasive carcinoma	Breast					75	Right Upper Outer Quadrant|Right	Axillary lymph node dissection alone
TCGA-B6-A0IN-01		45	3	No_Conversion	2573	2573	Positive	FEMALE							Negative	N0	2573	1	LumB	Luminal A	Negative		-2	-3	followup	T1	T1	DECEASED	TCGA-B6-A0IN-01	Kirc+	C3-BRCA/Luminal	cluster 4	BRCA CIMP c7		BRCA nonbasal-like c7	miRNA cluster 6	cluster 1	mutation c1uster 9	TCGA-B6-A0IN	TCGA Breast Cancer (BRCA)	breast invasive carcinoma	Breast	YES		NO		45	Right Upper Outer Quadrant|Right	No axillary staging
TCGA-B6-A0IO-01	Stage IIA	66	3	Stage IIA	3350		Positive	FEMALE	Negative	3	3	3	Negative	M0	Negative	N0	3350	0	LumA	Luminal A	Indeterminate	X	0	-3	followup	T_Other	T2	LIVING	TCGA-B6-A0IO-01	High	C3-BRCA/Luminal	cluster 2	BRCA non-CIMP c9	BRCA nonbasal-like c8	BRCA nonbasal-like c7	miRNA cluster 6	cluster 1	mutation c1uster 9	TCGA-B6-A0IO	TCGA Breast Cancer (BRCA)	breast invasive carcinoma	Breast					66	Left	Axillary lymph node dissection alone
TCGA-B6-A0IP-01	Stage IA	74	2	Stage I	3374		Positive	FEMALE	Negative				Negative	M0	Negative	N0	3374	0	LumA	Luminal A	Positive		-5	0	followup	T1	T1	LIVING	TCGA-B6-A0IP-01	Iq	C3-BRCA/Luminal	cluster 4	BRCA CIMP c7		BRCA nonbasal-like c7	miRNA cluster 14	cluster 2	mutation cluster 4	TCGA-B6-A0IP	TCGA Breast Cancer (BRCA)	breast invasive carcinoma	Breast					74	Left Upper Outer Quadrant	Axillary lymph node dissection alone
TCGA-B6-A0IQ-01	Stage IIIA	40	1	No_Conversion	4284		Negative	FEMALE	Negative	2	2	2	Negative	M0	Positive	N1	4284	0	Basal	Basal-like	Negative	Basal	-13	-12	followup	T_Other	T3	LIVING	TCGA-B6-A0IQ-01	High	C4-BRCA/Basal	cluster 5	BRCA basal-like c8	BRCA basal-like c6	BRCA basal-like c8	miRNA cluster 7	cluster 5	mutation cluster 5	TCGA-B6-A0IQ	TCGA Breast Cancer (BRCA)	breast invasive carcinoma	Breast					40	Left Upper Outer Quadrant|Left	Axillary lymph node dissection alone
TCGA-B6-A0RE-01		61	1	No_Conversion	6434		Negative	FEMALE	Negative				Negative	M0	Negative	N0	6434	0	Basal	Basal-like	Negative		-13	-12	followup		TX	LIVING	TCGA-B6-A0RE-01	High	C4-BRCA/Basal	cluster 5	BRCA basal-like c8		BRCA basal-like c8	miRNA cluster 4	cluster 4	mutation cluster 5	TCGA-B6-A0RE	TCGA Breast Cancer (BRCA)	breast invasive carcinoma	Breast					61	Right Upper Outer Quadrant|Right	Axillary lymph node dissection alone
TCGA-B6-A0RG-01	Stage IIB	26	2	Stage IIB	2082		Negative	FEMALE	Negative	3	3	3	Negative	M0	Negative	N0	2082	0	LumA	Luminal A	Negative	ReacII	0	-3	followup	T_Other	T3	LIVING	TCGA-B6-A0RG-01	High	C3-BRCA/Luminal	cluster 2	BRCA non-CIMP c9	BRCA nonbasal-like c8	BRCA nonbasal-like c7	miRNA cluster 3	cluster 4	mutation cluster 4	TCGA-B6-A0RG	TCGA Breast Cancer (BRCA)	breast invasive carcinoma	Breast					26	Left	Axillary lymph node dissection alone
TCGA-B6-A0RH-01	Stage IIA	51	2	Stage IIA	5748		Positive	FEMALE	Positive	3	3	3	Negative	M0	Negative	N0	5748	0	Her2	HER2-enriched	Positive	ReacII	-1	-5	followup	T_Other	T2	LIVING	TCGA-B6-A0RH-01	High	C3-BRCA/Luminal	cluster 2	BRCA non-CIMP c9	BRCA basal-like c6	BRCA nonbasal-like c7	miRNA cluster 4	cluster 6	mutation cluster 3	TCGA-B6-A0RH	TCGA Breast Cancer (BRCA)	breast invasive carcinoma	Breast	YES	YES	YES		51	Left Lower Inner Quadrant	Axillary lymph node dissection alone
TCGA-B6-A0RI-01	Stage IIIB	44	2	No_Conversion	7125		Positive	FEMALE	Negative				Negative	M0	Positive	N1	7125	0	LumA	Luminal A	Positive		-7	-3	followup	T_Other	T4	LIVING	TCGA-B6-A0RI-01	Iq	C3-BRCA/Luminal	cluster 2	BRCA non-CIMP c9		BRCA nonbasal-like c7	miRNA cluster 4	cluster 4	mutation c1uster 9	TCGA-B6-A0RI	TCGA Breast Cancer (BRCA)	breast invasive carcinoma	Breast	YES	YES	YES		44	Right Upper Outer Quadrant|Right	Axillary lymph node dissection alone
TCGA-B6-A0RL-01	Stage IIA	60	2	Stage IIA	2469	2469	Positive	FEMALE	Negative	4	3	4	Negative	M0	Negative	N0	2469	1	LumB	Luminal B	Positive	LumA/B	-10	-3	followup	T_Other	T2	DECEASED	TCGA-B6-A0RL-01	High	C3-BRCA/Luminal	cluster 3	BRCA CIMP c7	BRCA nonbasal-like c8	BRCA nonbasal-like c7	miRNA cluster 12	cluster 5	mutation c1uster 10	TCGA-B6-A0RL	TCGA Breast Cancer (BRCA)	breast invasive carcinoma	Breast					60	Left	Axillary lymph node dissection alone
TCGA-B6-A0RM-01		57	4	No_Conversion	2373	2373	Positive	FEMALE	Negative	3	3	3			Negative	N0	2373	1	LumA	Luminal A	Positive	LumA	-10	-3	followup		TX	DECEASED	TCGA-B6-A0RM-01	Kirc+	C3-BRCA/Luminal	cluster 2	BRCA non-CIMP c9	BRCA nonbasal-like c8	BRCA nonbasal-like c7	miRNA cluster 14	cluster 2	mutation c1uster 9	TCGA-B6-A0RM	TCGA Breast Cancer (BRCA)	breast invasive carcinoma	Breast					57	Left	No axillary staging
TCGA-B6-A0RN-01	Stage IA	60	2	Stage I	5261		Negative	FEMALE	Negative	1	4	3	Negative	M0	Negative	N0	5261	0	LumA	Luminal A	Negative	ReacI	-5	-3	followup	T1	T1	LIVING	TCGA-B6-A0RN-01	Iq	C3-BRCA/Luminal	cluster 4	BRCA CIMP c7	BRCA nonbasal-like c8	BRCA nonbasal-like c7	miRNA cluster 14	cluster 2	mutation cluster 4	TCGA-B6-A0RN	TCGA Breast Cancer (BRCA)	breast invasive carcinoma	Breast					60	Right Upper Inner Quadrant|Right	Axillary lymph node dissection alone
TCGA-B6-A0RO-01	Stage IIIB	71	3	No_Conversion	4928		Positive	FEMALE	Negative	3	3	3	Negative	M0	Positive	N1	4928	0	LumA	Luminal A	Positive	ReacI	0	-3	followup	T_Other	T4	LIVING	TCGA-B6-A0RO-01	BRCA-LUAD+	C3-BRCA/Luminal	cluster 2	BRCA non-CIMP c9	BRCA nonbasal-like c8	BRCA nonbasal-like c7	miRNA cluster 6	cluster 1	mutation cluster 4	TCGA-B6-A0RO	TCGA Breast Cancer (BRCA)	breast invasive carcinoma	Breast					71	Right	Axillary lymph node dissection alone
TCGA-B6-A0RP-01	Stage IIIB	73	4	No_Conversion	3126	3126	Positive	FEMALE	Negative	3	3	3	Negative	M0	Positive	N1	3126	1	LumA	Luminal A	Positive	LumA	-12	-4	followup	T_Other	T2	DECEASED	TCGA-B6-A0RP-01	BRCA-LUAD+	C3-BRCA/Luminal	cluster 2	BRCA non-CIMP c9	BRCA nonbasal-like c8	BRCA nonbasal-like c7	miRNA cluster 4	cluster 4	mutation cluster 4	TCGA-B6-A0RP	TCGA Breast Cancer (BRCA)	breast invasive carcinoma	Breast	YES	NO	NO		73	Left Upper Outer Quadrant|Left	Axillary lymph node dissection alone
TCGA-B6-A0RQ-01	Stage IIB	68	1	Stage IIB		4273	Positive	FEMALE	Negative	3	4	3	Negative	M0	Negative	N0	4273	1	Normal	Luminal A	Positive	ReacI	-5	-7	followup	T_Other	T3	DECEASED	TCGA-B6-A0RQ-01	Quiet	C3-BRCA/Luminal	cluster 1	BRCA non-CIMP c9	BRCA nonbasal-like c8	BRCA nonbasal-like c7	miRNA cluster 4	cluster 6	mutation cluster 4	TCGA-B6-A0RQ	TCGA Breast Cancer (BRCA)	breast invasive carcinoma	Breast					68	Right Upper Outer Quadrant|Right	Axillary lymph node dissection alone
TCGA-B6-A0RS-01	Stage IIA	38	1	Stage IIA	3062	3062	Negative	FEMALE	Negative				Negative	M0	Negative	N0	3062	1	Her2	HER2-enriched	Negative		0	0	followup	T_Other	T2	DECEASED	TCGA-B6-A0RS-01	High	C3-BRCA/Luminal	cluster 5	Cluster 5		BRCA nonbasal-like c7	miRNA cluster 4	cluster 4	mutation cluster 5	TCGA-B6-A0RS	TCGA Breast Cancer (BRCA)	breast invasive carcinoma	Breast	YES	NO	YES		38	Left Lower Inner Quadrant|Left	Axillary lymph node dissection alone
TCGA-B6-A0RT-01	Stage IIIA	39	1	No_Conversion	2721		Negative	FEMALE	Negative	2	2	2	Negative	M0	Positive	N1	2721	0	Basal	Basal-like	Negative	ReacII	-13	-12	followup	T_Other	T3	LIVING	TCGA-B6-A0RT-01	BRCA-LUAD+	C4-BRCA/Basal	cluster 5	Low purity c2	BRCA basal-like c6	BRCA basal-like c8	miRNA cluster 7	cluster 3	mutation c1uster 9	TCGA-B6-A0RT	TCGA Breast Cancer (BRCA)	breast invasive carcinoma	Breast					39	Right Upper Outer Quadrant|Right	Axillary lymph node dissection alone
TCGA-B6-A0RU-01	Stage IA	49	1	Stage I	3991		Negative	FEMALE	Negative	2	2	2	Negative	M0	Negative	N0	3991	0	Basal	Basal-like	Negative	Basal	-13	-11	followup	T1	T1	LIVING	TCGA-B6-A0RU-01	Squamous	C4-BRCA/Basal	cluster 5	BRCA basal-like c8	BRCA basal-like c6	BRCA basal-like c8	miRNA cluster 13	cluster 6	mutation cluster 5	TCGA-B6-A0RU	TCGA Breast Cancer (BRCA)	breast invasive carcinoma	Breast			YES		40	Right	Axillary lymph node dissection alone
TCGA-B6-A0RV-01	Stage IIIA	42	4	No_Conversion	4788		Positive	FEMALE	Negative	3	4	3	Negative	M0	Positive	N2	4788	0	LumA	Luminal A	Positive	ReacII	-5	0	followup	T_Other	T3	LIVING	TCGA-B6-A0RV-01	Kirc+	C3-BRCA/Luminal	cluster 1	BRCA CIMP c7	BRCA nonbasal-like c8	BRCA nonbasal-like c7	miRNA cluster 4	cluster 6	mutation c1uster 9	TCGA-B6-A0RV	TCGA Breast Cancer (BRCA)	breast invasive carcinoma	Breast					42	Right	Axillary lymph node dissection alone
TCGA-B6-A0WS-01		58	4	Stage I		2965	Positive	FEMALE	Negative				Negative	M0	Negative	N0	2965	1	LumA	Luminal A	Positive		0	-4	followup	T1	T1	DECEASED	TCGA-B6-A0WS-01	Kirc+	C3-BRCA/Luminal	cluster 1	BRCA non-CIMP c9		BRCA nonbasal-like c7	miRNA c1uster 10	cluster 7	mutation c1uster 9	TCGA-B6-A0WS	TCGA Breast Cancer (BRCA)	breast invasive carcinoma	Breast					58	Left Upper Outer Quadrant|Left	No axillary staging
TCGA-B6-A0WT-01	Stage IIB	61	3	No_Conversion	5739		Positive	FEMALE	Negative				Negative	M0	Positive	N1	5739	0	LumA	Luminal A	Positive		-2	-4	followup	T_Other	T2	LIVING	TCGA-B6-A0WT-01	BRCA-LUAD+	C3-BRCA/Luminal	cluster 2	BRCA non-CIMP c9		BRCA nonbasal-like c7	miRNA cluster 4	cluster 4	mutation c1uster 9	TCGA-B6-A0WT	TCGA Breast Cancer (BRCA)	breast invasive carcinoma	Breast	YES	NO	YES		61	Left Lower Inner Quadrant|Left	Axillary lymph node dissection alone
TCGA-B6-A0WV-01	Stage IIB	67	5	No_Conversion	2422	2422	Positive	FEMALE	Negative				Negative	M0	Positive	N1	2422	1	LumB	Luminal B	Positive		0	-3	followup	T_Other	T2	DECEASED	TCGA-B6-A0WV-01	High	C3-BRCA/Luminal	cluster 4	BRCA CIMP c7		BRCA nonbasal-like c7	miRNA cluster 4	cluster 4	mutation c1uster 9	TCGA-B6-A0WV	TCGA Breast Cancer (BRCA)	breast invasive carcinoma	Breast					67	Right	Axillary lymph node dissection alone
TCGA-B6-A0WW-01		58	4	No_Conversion	546	557	Positive	FEMALE	Negative						Positive	N1	557	1	LumB	Luminal B	Positive		0	-3	followup	T_Other	T2	DECEASED	TCGA-B6-A0WW-01	BRCA-LUAD+	C3-BRCA/Luminal	cluster 4	BRCA CIMP c7		BRCA nonbasal-like c7	miRNA cluster 14	cluster 2	mutation cluster 4	TCGA-B6-A0WW	TCGA Breast Cancer (BRCA)	breast invasive carcinoma	Breast	YES	NO	NO		58	Right Upper Inner Quadrant|Right	Axillary lymph node dissection alone
TCGA-B6-A0WX-01	Stage IIIA	40	1	No_Conversion	653	653	Negative	FEMALE	Negative	2	2	2	Negative	M0	Positive	N1	653	1	Basal	Basal-like	Negative	X	-13	0	followup	T_Other	T3	DECEASED	TCGA-B6-A0WX-01	High	C4-BRCA/Basal	cluster 5	BRCA basal-like c8	KIRC-like c1	BRCA basal-like c8	miRNA cluster 4	cluster 4	mutation cluster 5	TCGA-B6-A0WX	TCGA Breast Cancer (BRCA)	breast invasive carcinoma	Breast	NO	NO	NO		40	Left	Axillary lymph node dissection alone
TCGA-B6-A0WY-01	Stage IIIA	40	4	No_Conversion	3410	3460	Positive	FEMALE	Negative				Negative	M0	Positive	N1	3460	1	LumA	Luminal A	Negative		-5	-3	followup	T_Other	T3	DECEASED	TCGA-B6-A0WY-01	High	C3-BRCA/Luminal	cluster 1	BRCA non-CIMP c9		BRCA nonbasal-like c7	miRNA cluster 4	cluster 4	mutation cluster 4	TCGA-B6-A0WY	TCGA Breast Cancer (BRCA)	breast invasive carcinoma	Breast	YES	YES	NO		40	Left Lower Inner Quadrant|Left	Axillary lymph node dissection alone
TCGA-B6-A0WZ-01	Stage IIB	50	2	No_Conversion	3941		Positive	FEMALE	Negative				Negative	M0	Positive	N1	3941	0	LumA	Luminal A	Positive		-12	-3	followup	T_Other	T2	LIVING	TCGA-B6-A0WZ-01	Kirc+	C3-BRCA/Luminal	cluster 4	BRCA non-CIMP c9		BRCA nonbasal-like c7	miRNA cluster 12	cluster 4	mutation cluster 4	TCGA-B6-A0WZ	TCGA Breast Cancer (BRCA)	breast invasive carcinoma	Breast					50	Right Upper Inner Quadrant|Right	Axillary lymph node dissection alone
TCGA-B6-A0X0-01	Stage IA	54	2	Stage I		3945	Positive	FEMALE	Negative	3	3	3	Negative	M0	Negative	N0	3945	1	LumA	Luminal A	Positive	LumA	-5	-3	followup	T1	T1	DECEASED	TCGA-B6-A0X0-01	Iq	C3-BRCA/Luminal	cluster 2	BRCA non-CIMP c9	BRCA nonbasal-like c8	BRCA nonbasal-like c7	miRNA c1uster 10	cluster 7	mutation cluster 12	TCGA-B6-A0X0	TCGA Breast Cancer (BRCA)	breast invasive carcinoma	Breast					54	Right Upper Outer Quadrant|Right	Axillary lymph node dissection alone
TCGA-B6-A0X1-01	Stage IV	48	3	No_Conversion	5671		Negative	FEMALE					Positive	M1	Positive	N2	5671	0	Basal	Basal-like	Negative	Basal	-13	-12	followup	T_Other	T2	LIVING	TCGA-B6-A0X1-01	High	C4-BRCA/Basal	cluster 5	BRCA basal-like c8	BRCA basal-like c6	BRCA basal-like c8			mutation cluster 5	TCGA-B6-A0X1	TCGA Breast Cancer (BRCA)	breast invasive carcinoma	Breast	YES	YES	NO		48	Left	Axillary lymph node dissection alone
TCGA-B6-A0X4-01	Stage IIB	62	3	No_Conversion	776	859	Positive	FEMALE	Negative				Negative	M0	Positive	N1	859	1	LumA	Luminal A	Positive		-12	-3	followup	T_Other	T2	DECEASED	TCGA-B6-A0X4-01	Iq	C3-BRCA/Luminal	cluster 2	BRCA non-CIMP c9		BRCA nonbasal-like c7	miRNA cluster 6	cluster 1	mutation c1uster 9	TCGA-B6-A0X4	TCGA Breast Cancer (BRCA)	breast invasive carcinoma	Breast	YES	YES	NO		62	Left	Axillary lymph node dissection alone
TCGA-B6-A0X5-01	Stage IIB	61	4	No_Conversion	2097	2097	Positive	FEMALE	Negative				Negative	M0	Positive	N1	2097	1	LumB	Luminal B	Positive		0	-3	followup	T_Other	T2	DECEASED	TCGA-B6-A0X5-01	Kirc+	C3-BRCA/Luminal	cluster 4	BRCA non-CIMP c9		BRCA nonbasal-like c7	miRNA cluster 6	cluster 1	mutation cluster 4	TCGA-B6-A0X5	TCGA Breast Cancer (BRCA)	breast invasive carcinoma	Breast	NO	NO	NO		61	Left	Axillary lymph node dissection alone
TCGA-B6-A0X7-01		62	2	No_Conversion	1791	1791	Positive	FEMALE	Negative						Negative	N0	1791	1	LumA	Luminal A	Positive		-5	-3	enrollment	T1	T1	DECEASED	TCGA-B6-A0X7-01	BRCA-LUAD+	C3-BRCA/Luminal	cluster 2	BRCA non-CIMP c9		BRCA nonbasal-like c7	miRNA cluster 7	cluster 3	mutation cluster 4	TCGA-B6-A0X7	TCGA Breast Cancer (BRCA)	breast invasive carcinoma	Breast	NO	NO	YES		62	Right	No axillary staging
TCGA-B6-A1KC-01	Stage IIA	67	4	Stage IIB	1326		Positive	FEMALE					Negative	M0	Positive	N1	1326	0	LumB		Negative				followup	T_Other	T2	LIVING	TCGA-B6-A1KC-01	BRCA-LUAD+		cluster 3	BRCA CIMP c7		BRCA nonbasal-like c7	miRNA c1uster 9	cluster 5	mutation c1uster 9	TCGA-B6-A1KC	TCGA Breast Cancer (BRCA)	breast invasive carcinoma	Breast					67	Right Lower Outer Quadrant	Sentinel node biopsy alone
TCGA-B6-A1KF-01	Stage IIB	68	1	Stage IIB	3088		Negative	FEMALE	Positive				Negative	M0	Positive	N1	3088	0	Basal		Negative				followup	T_Other	T2	LIVING	TCGA-B6-A1KF-01	High	C4-BRCA/Basal	cluster 4	BRCA basal-like c8		BRCA basal-like c8	miRNA cluster 12	cluster 5	mutation c1uster 9	TCGA-B6-A1KF	TCGA Breast Cancer (BRCA)	breast invasive carcinoma	Breast					68	Right Lower Outer Quadrant	Axillary lymph node dissection alone
TCGA-B6-A1KI-01	Stage I	63	2	Stage I	2236		Positive	FEMALE	Negative				Negative	M0	Negative	N0	2236	0	LumA		Positive				followup	T1	T1	LIVING	TCGA-B6-A1KI-01	Iq	C3-BRCA/Luminal	cluster 1	BRCA non-CIMP c9		BRCA nonbasal-like c7	miRNA cluster 14	cluster 2	mutation cluster 4	TCGA-B6-A1KI	TCGA Breast Cancer (BRCA)	breast invasive carcinoma	Breast					63	Right Upper Inner Quadrant	Sentinel node biopsy alone
TCGA-B6-A1KN-01	Stage IIIB	57	5	Stage IIIC	4233		Negative	FEMALE	Positive				Negative	M0	Positive	N1	4233	0	LumB		Negative				followup	T_Other	T4	LIVING	TCGA-B6-A1KN-01	Squamous	C3-BRCA/Luminal	cluster 3	BRCA CIMP c7		BRCA nonbasal-like c7	miRNA cluster 4	cluster 6	mutation cluster 5	TCGA-B6-A1KN	TCGA Breast Cancer (BRCA)	breast invasive carcinoma	Breast					57	Right Upper Inner Quadrant	Axillary lymph node dissection alone
TCGA-B6-A2IU-01																			LumA										TCGA-B6-A2IU-01	BRCA-LUAD+	C3-BRCA/Luminal		BRCA non-CIMP c9	BRCA nonbasal-like c8	BRCA nonbasal-like c7	miRNA cluster 5			TCGA-B6-A2IU	TCGA Breast Cancer (BRCA)	breast invasive carcinoma	Breast	YES	YES			62	Right	Axillary lymph node dissection alone
TCGA-B6-A3ZX-01																													TCGA-B6-A3ZX-01										TCGA-B6-A3ZX	TCGA Breast Cancer (BRCA)	breast invasive carcinoma	Breast	YES	YES			50	Left Upper Inner Quadrant	Axillary lymph node dissection alone
TCGA-B6-A400-01																													TCGA-B6-A400-01										TCGA-B6-A400	TCGA Breast Cancer (BRCA)	breast invasive carcinoma	Breast					43	Left Upper Outer Quadrant	Sentinel lymph node biopsy plus axillary dissection
TCGA-B6-A401-01																													TCGA-B6-A401-01										TCGA-B6-A401	TCGA Breast Cancer (BRCA)	breast invasive carcinoma	Breast					47	Left Upper Outer Quadrant	Sentinel lymph node biopsy plus axillary dissection
TCGA-B6-A402-01																													TCGA-B6-A402-01										TCGA-B6-A402	TCGA Breast Cancer (BRCA)	breast invasive carcinoma	Breast	YES	NO			47	Right Lower Outer Quadrant	Sentinel node biopsy alone
TCGA-B6-A408-01																													TCGA-B6-A408-01										TCGA-B6-A408	TCGA Breast Cancer (BRCA)	breast invasive carcinoma	Breast					55	Left	Axillary lymph node dissection alone
TCGA-B6-A409-01																													TCGA-B6-A409-01										TCGA-B6-A409	TCGA Breast Cancer (BRCA)	breast invasive carcinoma	Breast					44	Right Upper Outer Quadrant	Sentinel lymph node biopsy plus axillary dissection
TCGA-B6-A40B-01																													TCGA-B6-A40B-01										TCGA-B6-A40B	TCGA Breast Cancer (BRCA)	breast invasive carcinoma	Breast					76	Left Upper Outer Quadrant	Sentinel node biopsy alone
TCGA-B6-A40C-01																													TCGA-B6-A40C-01										TCGA-B6-A40C	TCGA Breast Cancer (BRCA)	breast invasive carcinoma	Breast					51	Left Upper Outer Quadrant	Sentinel node biopsy alone
TCGA-BH-A0AU-01	Stage IIA	45	1	Stage IIA	746		Positive	FEMALE	Negative	3	4	3	Negative	M0	Negative	N0	746	0	LumB	Luminal B	Positive	ReacI	-3	-3	enrollment	T_Other	T2	LIVING	TCGA-BH-A0AU-01	High	C3-BRCA/Luminal	cluster 2	BRCA non-CIMP c9	BRCA nonbasal-like c8	BRCA nonbasal-like c7	miRNA cluster 4	cluster 6	mutation c1uster 9	TCGA-BH-A0AU	TCGA Breast Cancer (BRCA)	breast invasive carcinoma	Breast					45	Left Upper Inner Quadrant
TCGA-BH-A0AU-11		45			746			FEMALE									746	0	Normal						enrollment			LIVING	TCGA-BH-A0AU-11		C3-BRCA/Luminal							mutation c1uster 9	TCGA-BH-A0AU	TCGA Breast Cancer (BRCA)	breast invasive carcinoma	Breast					45	Left Upper Inner Quadrant
TCGA-BH-A0AV-01	Stage I	52	1	Stage I	1180		Negative	FEMALE	Negative	2	2	2	Negative	M0	Negative	N0	1180	0	Basal	Basal-like	Negative	ReacII	-13	0	enrollment	T1	T1	LIVING	TCGA-BH-A0AV-01	Squamous	C4-BRCA/Basal	cluster 5	BRCA basal-like c8	BRCA basal-like c6	BRCA basal-like c8	miRNA cluster 4	cluster 4	mutation cluster 5	TCGA-BH-A0AV	TCGA Breast Cancer (BRCA)	breast invasive carcinoma	Breast					52	Left Upper Inner Quadrant
TCGA-BH-A0AW-01	Stage IIA	56	3	No_Conversion	622		Positive	FEMALE	Positive				Negative	M0	Positive	N1	622	0	Her2	HER2-enriched	Negative		-11	-5	followup	T1	T1	LIVING	TCGA-BH-A0AW-01	High	C3-BRCA/Luminal	cluster 1	BRCA non-CIMP c9		BRCA nonbasal-like c7	miRNA cluster 12	cluster 5	mutation cluster 5	TCGA-BH-A0AW	TCGA Breast Cancer (BRCA)	breast invasive carcinoma	Breast					56	Left Upper Inner Quadrant|Left Upper Outer Quadrant|Left	Axillary lymph node dissection alone
TCGA-BH-A0AY-01	Stage IIA	62	3	Stage IIA	777		Positive	FEMALE	Negative	1	4	3	Negative	M0	Negative	N0	777	0	LumA	Luminal B	Positive	ReacI	-1	-3	followup	T_Other	T2	LIVING	TCGA-BH-A0AY-01	BRCA-LUAD+	C3-BRCA/Luminal	cluster 1	BRCA CIMP c7	BRCA nonbasal-like c8	BRCA nonbasal-like c7	miRNA cluster 4	cluster 4	mutation c1uster 9	TCGA-BH-A0AY	TCGA Breast Cancer (BRCA)	breast invasive carcinoma	Breast					62	Left Lower Outer Quadrant|Left	Sentinel node biopsy alone
TCGA-BH-A0AY-11		62			777			FEMALE									777	0	Normal						followup			LIVING	TCGA-BH-A0AY-11		C3-BRCA/Luminal							mutation c1uster 9	TCGA-BH-A0AY	TCGA Breast Cancer (BRCA)	breast invasive carcinoma	Breast					62	Left Lower Outer Quadrant|Left	Sentinel node biopsy alone
TCGA-BH-A0AZ-01	Stage IIIA	47	2	Stage IIIA	867		Positive	FEMALE	Negative	3	4	3	Negative	M0	Positive	N1	867	0	LumA	Luminal A	Positive	ReacI	-5	-7	enrollment	T_Other	T3	LIVING	TCGA-BH-A0AZ-01	Iq	C3-BRCA/Luminal	cluster 2	BRCA non-CIMP c9	BRCA nonbasal-like c8	BRCA nonbasal-like c7	miRNA cluster 4	cluster 4	mutation c1uster 9	TCGA-BH-A0AZ	TCGA Breast Cancer (BRCA)	breast invasive carcinoma	Breast					47	Right
TCGA-BH-A0AZ-11		47			867			FEMALE									867	0	Normal						enrollment			LIVING	TCGA-BH-A0AZ-11		C3-BRCA/Luminal							mutation c1uster 9	TCGA-BH-A0AZ	TCGA Breast Cancer (BRCA)	breast invasive carcinoma	Breast					47	Right
TCGA-BH-A0B0-01	Stage I	56	2	Stage I	1427		Positive	FEMALE	Negative	3	4	3	Negative	M0	Negative	N0	1427	0	LumA	Luminal A	Positive	ReacI	-5	-7	enrollment	T1	T1	LIVING	TCGA-BH-A0B0-01	BRCA-LUAD+	C3-BRCA/Luminal	cluster 1	BRCA non-CIMP c9	BRCA nonbasal-like c8	BRCA nonbasal-like c7	miRNA c1uster 9	cluster 6	mutation cluster 3	TCGA-BH-A0B0	TCGA Breast Cancer (BRCA)	breast invasive carcinoma	Breast					56	Left Upper Outer Quadrant
TCGA-BH-A0B1-01	Stage IIB	66		No_Conversion	1148		Positive	FEMALE	Negative				Negative	M0	Positive	N1	1148	0	LumA	Luminal A	Positive	LumA/B	-3	-3	followup	T_Other	T2	LIVING	TCGA-BH-A0B1-01					BRCA nonbasal-like c8	BRCA nonbasal-like c7	miRNA cluster 4	cluster 6	mutation c1uster 9	TCGA-BH-A0B1	TCGA Breast Cancer (BRCA)	breast invasive carcinoma	Breast					66	Right Upper Outer Quadrant|Right	Sentinel lymph node biopsy plus axillary dissection
TCGA-BH-A0B2-01	Stage I	43		Stage I	1242		Positive	FEMALE	Negative				Negative	M0	Negative	N0	1242	0	LumA		Positive				enrollment	T1	T1	LIVING	TCGA-BH-A0B2-01					BRCA nonbasal-like c8					TCGA-BH-A0B2	TCGA Breast Cancer (BRCA)	breast invasive carcinoma	Breast
TCGA-BH-A0B2-11		43			1242			FEMALE									1242	0	Normal						enrollment			LIVING	TCGA-BH-A0B2-11										TCGA-BH-A0B2	TCGA Breast Cancer (BRCA)	breast invasive carcinoma	Breast
TCGA-BH-A0B3-01	Stage IIB	53	1	No_Conversion	1203		Negative	FEMALE	Negative	2	2	2	Negative	M0	Positive	N1	1203	0	Basal	Basal-like	Negative	Basal	-13	-12	followup	T_Other	T2	LIVING	TCGA-BH-A0B3-01	High	C4-BRCA/Basal	cluster 5	Low purity c2	BRCA basal-like c6	BRCA basal-like c8	miRNA cluster 4	cluster 4	mutation cluster 5	TCGA-BH-A0B3	TCGA Breast Cancer (BRCA)	breast invasive carcinoma	Breast					53	Right Upper Inner Quadrant|Right Upper Outer Quadrant|Right	Sentinel lymph node biopsy plus axillary dissection
TCGA-BH-A0B3-11		53			1203			FEMALE									1203	0	Normal						followup			LIVING	TCGA-BH-A0B3-11		C4-BRCA/Basal							mutation cluster 5	TCGA-BH-A0B3	TCGA Breast Cancer (BRCA)	breast invasive carcinoma	Breast					53	Right Upper Inner Quadrant|Right Upper Outer Quadrant|Right	Sentinel lymph node biopsy plus axillary dissection
TCGA-BH-A0B4-01	Stage IIIA	65	5	No_Conversion	1191		Positive	MALE	Positive	1	3	3	Negative	M0	Positive	N2	1191	0	LumA	Luminal A	Positive	ReacII	-3	-3	followup	T_Other	T2	LIVING	TCGA-BH-A0B4-01	High	C3-BRCA/Luminal	cluster 4	BRCA CIMP c7	BRCA nonbasal-like c8	BRCA nonbasal-like c7	miRNA cluster 4	cluster 6	mutation c1uster 9	TCGA-BH-A0B4	TCGA Breast Cancer (BRCA)	breast invasive carcinoma	Breast					65	Left	Axillary lymph node dissection alone
TCGA-BH-A0B5-01	Stage IIIA	40	2	Stage IIIA	1471		Positive	FEMALE	Negative	1	3	4	Negative	M0	Positive	N2	1471	0	LumA	Luminal B	Positive	ReacII	-7	-3	enrollment	T_Other	T2	LIVING	TCGA-BH-A0B5-01	BRCA-LUAD+	C3-BRCA/Luminal	cluster 4	BRCA non-CIMP c9	KIRC-like c1	BRCA nonbasal-like c7	miRNA c1uster 10	cluster 7	mutation cluster 1	TCGA-BH-A0B5	TCGA Breast Cancer (BRCA)	breast invasive carcinoma	Breast					40	Left
TCGA-BH-A0B5-11		40			1471			FEMALE									1471	0	LumA						enrollment			LIVING	TCGA-BH-A0B5-11		C3-BRCA/Luminal							mutation cluster 1	TCGA-BH-A0B5	TCGA Breast Cancer (BRCA)	breast invasive carcinoma	Breast					40	Left
TCGA-BH-A0B6-01																													TCGA-BH-A0B6-01	Squamous			BRCA non-CIMP c9	BRCA nonbasal-like c8		miRNA cluster 3			TCGA-BH-A0B6	TCGA Breast Cancer (BRCA)	breast invasive carcinoma	Breast					47	Left Upper Outer Quadrant
TCGA-BH-A0B7-01	Stage IIB	42	3	Stage IIB	1733		Positive	FEMALE	Positive	2	2	1	Negative	M0	Positive	N1	1733	0	Her2	HER2-enriched	Positive	Her2	-11	-8	enrollment	T_Other	T2	LIVING	TCGA-BH-A0B7-01	High	C3-BRCA/Luminal	cluster 5	BRCA basal-like c8	BRCA basal-like c6	BRCA nonbasal-like c7	miRNA cluster 7	cluster 3	mutation cluster 5	TCGA-BH-A0B7	TCGA Breast Cancer (BRCA)	breast invasive carcinoma	Breast					42	Right
TCGA-BH-A0B7-11		42			1733			FEMALE									1733	0	Normal						enrollment			LIVING	TCGA-BH-A0B7-11		C3-BRCA/Luminal							mutation cluster 5	TCGA-BH-A0B7	TCGA Breast Cancer (BRCA)	breast invasive carcinoma	Breast					42	Right
TCGA-BH-A0B8-01	Stage IB	64		Stage I	1569		Positive	FEMALE	Negative				Negative	M0	Negative	N0	1569	0	LumA	Luminal A	Positive		-10	-3	followup	T1	T1	LIVING	TCGA-BH-A0B8-01			cluster 3	BRCA CIMP c7		BRCA nonbasal-like c7	miRNA cluster 6	cluster 7	mutation c1uster 9	TCGA-BH-A0B8	TCGA Breast Cancer (BRCA)	breast invasive carcinoma	Breast					64	Right Upper Inner Quadrant|Right	Sentinel node biopsy alone
TCGA-BH-A0B8-11		64			1569			FEMALE									1569	0	Normal						followup			LIVING	TCGA-BH-A0B8-11									mutation c1uster 9	TCGA-BH-A0B8	TCGA Breast Cancer (BRCA)	breast invasive carcinoma	Breast					64	Right Upper Inner Quadrant|Right	Sentinel node biopsy alone
TCGA-BH-A0B9-01	Stage IA	44	1	Stage I	1572		Negative	FEMALE	Negative	2	2	2	Negative	M0	Negative	N0	1572	0		Basal-like	Negative	Basal	-13	-12	followup	T1	T1	LIVING	TCGA-BH-A0B9-01	High	C4-BRCA/Basal	cluster 5	BRCA basal-like c8	BRCA basal-like c6		miRNA cluster 14	cluster 5	mutation cluster 5	TCGA-BH-A0B9	TCGA Breast Cancer (BRCA)	breast invasive carcinoma	Breast					44	Right Lower Inner Quadrant|Right Lower Outer Quadrant|Right	Sentinel node biopsy alone
TCGA-BH-A0BA-01	Stage IIIC	51	3	No_Conversion	1132		Positive	FEMALE	Negative	1	4	3	Negative	M0	Positive	N3	1132	0	LumA	Luminal A	Positive	ReacI	-5	0	followup	T_Other	T3	LIVING	TCGA-BH-A0BA-01	High	C3-BRCA/Luminal	cluster 4	BRCA CIMP c7	KIRC-like c1	BRCA nonbasal-like c7	miRNA cluster 14	cluster 6	mutation cluster 4	TCGA-BH-A0BA	TCGA Breast Cancer (BRCA)	breast invasive carcinoma	Breast					51	Left Upper Inner Quadrant|Left Upper Outer Quadrant|Left Lower Inner Quadrant|Left Lower Outer Quadrant|Left	Sentinel lymph node biopsy plus axillary dissection
TCGA-BH-A0BA-11		51			1132			FEMALE									1132	0	Normal						followup			LIVING	TCGA-BH-A0BA-11		C3-BRCA/Luminal							mutation cluster 4	TCGA-BH-A0BA	TCGA Breast Cancer (BRCA)	breast invasive carcinoma	Breast					51	Left Upper Inner Quadrant|Left Upper Outer Quadrant|Left Lower Inner Quadrant|Left Lower Outer Quadrant|Left	Sentinel lymph node biopsy plus axillary dissection
TCGA-BH-A0BC-01	Stage IIIC	60	2	No_Conversion	974		Positive	FEMALE	Negative	3	4	3	Negative	M0	Positive	N3	974	0	LumA	Luminal A	Positive	ReacI	-4	-4	followup	T_Other	T2	LIVING	TCGA-BH-A0BC-01	High	C3-BRCA/Luminal	cluster 2	BRCA non-CIMP c9	BRCA nonbasal-like c8	BRCA nonbasal-like c7	miRNA cluster 4	cluster 4	mutation cluster 3	TCGA-BH-A0BC	TCGA Breast Cancer (BRCA)	breast invasive carcinoma	Breast					60	Right Upper Inner Quadrant|Right Upper Outer Quadrant|Right	Sentinel lymph node biopsy plus axillary dissection
TCGA-BH-A0BC-11		60			974			FEMALE									974	0	Normal						followup			LIVING	TCGA-BH-A0BC-11		C3-BRCA/Luminal							mutation cluster 3	TCGA-BH-A0BC	TCGA Breast Cancer (BRCA)	breast invasive carcinoma	Breast					60	Right Upper Inner Quadrant|Right Upper Outer Quadrant|Right	Sentinel lymph node biopsy plus axillary dissection
TCGA-BH-A0BD-01	Stage IIA	47	4	No_Conversion	554		Positive	FEMALE	Negative				Negative	M0	Positive	N1	554	0	LumB	Luminal B	Positive		0	0	followup	T1	T1	LIVING	TCGA-BH-A0BD-01	Iq	C3-BRCA/Luminal	cluster 4	BRCA non-CIMP c9		BRCA nonbasal-like c7	miRNA cluster 4	cluster 4	mutation cluster 4	TCGA-BH-A0BD	TCGA Breast Cancer (BRCA)	breast invasive carcinoma	Breast					47	Left Upper Inner Quadrant|Left Upper Outer Quadrant|Left	Sentinel lymph node biopsy plus axillary dissection
TCGA-BH-A0BF-01	Stage IIB	56	2	Stage IIB	781		Positive	FEMALE	Negative	3	1	4	Negative	M0	Positive	N1	781	0	LumB	Luminal B	Positive	Basal	-2	-5	enrollment	T_Other	T2	LIVING	TCGA-BH-A0BF-01	BRCA-LUAD+	C3-BRCA/Luminal	cluster 1	BRCA CIMP c7	BRCA nonbasal-like c8	BRCA nonbasal-like c7	miRNA cluster 4	cluster 4	mutation cluster 3	TCGA-BH-A0BF	TCGA Breast Cancer (BRCA)	breast invasive carcinoma	Breast					56	Right Upper Outer Quadrant
TCGA-BH-A0BF-11		56			781			FEMALE									781	0							enrollment			LIVING	TCGA-BH-A0BF-11		C3-BRCA/Luminal							mutation cluster 3	TCGA-BH-A0BF	TCGA Breast Cancer (BRCA)	breast invasive carcinoma	Breast					56	Right Upper Outer Quadrant
TCGA-BH-A0BG-01	Stage I	73	1	Stage I	756		Negative	FEMALE	Negative				Negative	M0	Negative	N0	756	0	Basal	Basal-like	Negative		-13	-12	enrollment	T1	T1	LIVING	TCGA-BH-A0BG-01	High	C4-BRCA/Basal	cluster 5	BRCA basal-like c8		BRCA basal-like c8	miRNA c1uster 9	cluster 4	mutation cluster 5	TCGA-BH-A0BG	TCGA Breast Cancer (BRCA)	breast invasive carcinoma	Breast					73	Left Lower Outer Quadrant
TCGA-BH-A0BJ-01	Stage IIB	41	3	No_Conversion	660		Positive	FEMALE	Negative	3	4	3	Negative	M0	Positive	N1	660	0	LumA	Luminal A	Positive	ReacI	-5	-7	followup	T_Other	T2	LIVING	TCGA-BH-A0BJ-01	Iq	C3-BRCA/Luminal	cluster 2	BRCA non-CIMP c9	BRCA nonbasal-like c8	BRCA nonbasal-like c7	miRNA cluster 4	cluster 7	mutation c1uster 9	TCGA-BH-A0BJ	TCGA Breast Cancer (BRCA)	breast invasive carcinoma	Breast					41	Left Upper Outer Quadrant|Left	Sentinel lymph node biopsy plus axillary dissection
TCGA-BH-A0BJ-11		41			660			FEMALE									660	0	Normal						followup			LIVING	TCGA-BH-A0BJ-11		C3-BRCA/Luminal							mutation c1uster 9	TCGA-BH-A0BJ	TCGA Breast Cancer (BRCA)	breast invasive carcinoma	Breast					41	Left Upper Outer Quadrant|Left	Sentinel lymph node biopsy plus axillary dissection
TCGA-BH-A0BL-01	Stage I	35	3	Stage I	1339		Negative	FEMALE	Negative				Negative	M0	Negative	N0	1339	0	Basal	Basal-like	Negative		-13	-12	enrollment	T1	T1	LIVING	TCGA-BH-A0BL-01	BRCA-LUAD+	C4-BRCA/Basal	cluster 5	Low purity c2		BRCA basal-like c8	miRNA cluster 4	cluster 4	mutation cluster 5	TCGA-BH-A0BL	TCGA Breast Cancer (BRCA)	breast invasive carcinoma	Breast					35	Right Upper Outer Quadrant
TCGA-BH-A0BL-11		35			1339			FEMALE									1339	0							enrollment			LIVING	TCGA-BH-A0BL-11		C4-BRCA/Basal							mutation cluster 5	TCGA-BH-A0BL	TCGA Breast Cancer (BRCA)	breast invasive carcinoma	Breast					35	Right Upper Outer Quadrant
TCGA-BH-A0BM-01	Stage IIB	54	2	No_Conversion	1117		Positive	FEMALE	Negative	3	4	3	Negative	M0	Positive	N1	1117	0	LumA	Luminal A	Negative	ReacI	-5	-7	enrollment	T_Other	T2	LIVING	TCGA-BH-A0BM-01	Iq	C3-BRCA/Luminal	cluster 2	BRCA non-CIMP c9	BRCA nonbasal-like c8	BRCA nonbasal-like c7	miRNA cluster 3	cluster 6	mutation cluster 4	TCGA-BH-A0BM	TCGA Breast Cancer (BRCA)	breast invasive carcinoma	Breast					54	Right Upper Inner Quadrant|Right Upper Outer Quadrant|Right	Sentinel lymph node biopsy plus axillary dissection
TCGA-BH-A0BM-11		54			1117			FEMALE									1117	0	Normal						enrollment			LIVING	TCGA-BH-A0BM-11		C3-BRCA/Luminal							mutation cluster 4	TCGA-BH-A0BM	TCGA Breast Cancer (BRCA)	breast invasive carcinoma	Breast					54	Right Upper Inner Quadrant|Right Upper Outer Quadrant|Right	Sentinel lymph node biopsy plus axillary dissection
TCGA-BH-A0BO-01	Stage I	54	1	Stage I	1085		Positive	FEMALE	Negative	3	4	3	Negative	M0	Negative	N0	1085	0	LumA	Luminal A	Positive	ReacI	-5	-7	enrollment	T1	T1	LIVING	TCGA-BH-A0BO-01	Iq	C3-BRCA/Luminal	cluster 1	BRCA non-CIMP c9	BRCA nonbasal-like c8	BRCA nonbasal-like c7	miRNA cluster 13	cluster 6	mutation cluster 4	TCGA-BH-A0BO	TCGA Breast Cancer (BRCA)	breast invasive carcinoma	Breast					54	Left Upper Inner Quadrant
TCGA-BH-A0BO-11		54			1085			FEMALE									1085	0							enrollment			LIVING	TCGA-BH-A0BO-11		C3-BRCA/Luminal							mutation cluster 4	TCGA-BH-A0BO	TCGA Breast Cancer (BRCA)	breast invasive carcinoma	Breast					54	Left Upper Inner Quadrant
TCGA-BH-A0BP-01	Stage I	76	2	Stage I	1481		Positive	FEMALE	Negative	1	4	3	Negative	M0	Negative	N0	1481	0	LumA	Luminal A	Positive	ReacI	-5	-7	enrollment	T1	T1	LIVING	TCGA-BH-A0BP-01	High	C3-BRCA/Luminal	cluster 4	BRCA CIMP c7	BRCA nonbasal-like c8	BRCA nonbasal-like c7	miRNA cluster 4	cluster 4	mutation cluster 5	TCGA-BH-A0BP	TCGA Breast Cancer (BRCA)	breast invasive carcinoma	Breast					76	Left Upper Outer Quadrant
TCGA-BH-A0BQ-01	Stage I	39	2	Stage I	826		Positive	FEMALE	Negative	3	4	3	Negative	M0	Negative	N0	826	0	LumA	Luminal A	Positive	Her2	-5	-7	enrollment	T1	T1	LIVING	TCGA-BH-A0BQ-01	Iq	C3-BRCA/Luminal	cluster 1	BRCA non-CIMP c9	BRCA nonbasal-like c8	BRCA nonbasal-like c7	miRNA cluster 4	cluster 6	mutation c1uster 9	TCGA-BH-A0BQ	TCGA Breast Cancer (BRCA)	breast invasive carcinoma	Breast					39	Left
TCGA-BH-A0BQ-11		39			826			FEMALE									826	0	Normal						enrollment			LIVING	TCGA-BH-A0BQ-11		C3-BRCA/Luminal							mutation c1uster 9	TCGA-BH-A0BQ	TCGA Breast Cancer (BRCA)	breast invasive carcinoma	Breast					39	Left
TCGA-BH-A0BR-01	Stage I	59	1	Stage I	1632		Positive	FEMALE	Negative	1	3	3	Negative	M0	Negative	N0	1632	0	LumA	Luminal A	Positive	ReacI	-4	-3	enrollment	T1	T1	LIVING	TCGA-BH-A0BR-01	High	C3-BRCA/Luminal	cluster 4	BRCA CIMP c7	BRCA nonbasal-like c8	BRCA nonbasal-like c7	miRNA cluster 12	cluster 4	mutation cluster 3	TCGA-BH-A0BR	TCGA Breast Cancer (BRCA)	breast invasive carcinoma	Breast					59	Left Lower Inner Quadrant
TCGA-BH-A0BS-01	Stage IIIA	55	2	Stage IIIA	1640		Positive	FEMALE	Negative	3	3	3	Negative	M0	Positive	N1	1640	0	LumA	Luminal A	Positive	LumA/B	0	-2	enrollment	T_Other	T3	LIVING	TCGA-BH-A0BS-01	Iq	C3-BRCA/Luminal	cluster 2	BRCA non-CIMP c9	BRCA nonbasal-like c8	BRCA nonbasal-like c7	miRNA c1uster 10	cluster 7	mutation cluster 4	TCGA-BH-A0BS	TCGA Breast Cancer (BRCA)	breast invasive carcinoma	Breast					55	Left
TCGA-BH-A0BS-11		55			1640			FEMALE									1640	0	Normal						enrollment			LIVING	TCGA-BH-A0BS-11		C3-BRCA/Luminal							mutation cluster 4	TCGA-BH-A0BS	TCGA Breast Cancer (BRCA)	breast invasive carcinoma	Breast					55	Left
TCGA-BH-A0BT-01	Stage IIA	56	4	Stage IIA	1386		Positive	FEMALE	Negative	3	3	3	Negative	M0	Positive	N1	1386	0	LumA	Luminal A	Positive	ReacII	-12	-3	enrollment	T1	T1	LIVING	TCGA-BH-A0BT-01	High	C3-BRCA/Luminal	cluster 2	BRCA non-CIMP c9	BRCA nonbasal-like c8	BRCA nonbasal-like c7	miRNA cluster 7	cluster 6	mutation cluster 3	TCGA-BH-A0BT	TCGA Breast Cancer (BRCA)	breast invasive carcinoma	Breast					56	Right Upper Inner Quadrant
TCGA-BH-A0BT-11		56			1386			FEMALE									1386	0	Normal						enrollment			LIVING	TCGA-BH-A0BT-11		C3-BRCA/Luminal							mutation cluster 3	TCGA-BH-A0BT	TCGA Breast Cancer (BRCA)	breast invasive carcinoma	Breast					56	Right Upper Inner Quadrant
TCGA-BH-A0BV-01	Stage IIB	78	5	No_Conversion	1519		Positive	FEMALE	Negative	1	3	3	Negative	M0	Positive	N1	1519	0	LumA	Luminal A	Positive	LumA/B	0	-4	followup	T_Other	T2	LIVING	TCGA-BH-A0BV-01	BRCA-LUAD+	C3-BRCA/Luminal	cluster 4	BRCA CIMP c7	BRCA nonbasal-like c8	BRCA nonbasal-like c7	miRNA cluster 6	cluster 7	mutation cluster 4	TCGA-BH-A0BV	TCGA Breast Cancer (BRCA)	breast invasive carcinoma	Breast					78	Right Upper Inner Quadrant|Right	Sentinel lymph node biopsy plus axillary dissection
TCGA-BH-A0BV-11		78			1519			FEMALE									1519	0	Normal						followup			LIVING	TCGA-BH-A0BV-11		C3-BRCA/Luminal							mutation cluster 4	TCGA-BH-A0BV	TCGA Breast Cancer (BRCA)	breast invasive carcinoma	Breast					78	Right Upper Inner Quadrant|Right	Sentinel lymph node biopsy plus axillary dissection
TCGA-BH-A0BW-01	Stage I	71	1	Stage I	355		Negative	FEMALE	Negative	2	2	2	Negative	M0	Negative	N0	355	0	Basal	Basal-like	Negative	Basal	-13	-12	enrollment	T1	T1	LIVING	TCGA-BH-A0BW-01	High	C4-BRCA/Basal	cluster 5	BRCA basal-like c8	BRCA basal-like c6	BRCA basal-like c8	miRNA cluster 7	cluster 3	mutation c1uster 9	TCGA-BH-A0BW	TCGA Breast Cancer (BRCA)	breast invasive carcinoma	Breast					71	Left Lower Outer Quadrant
TCGA-BH-A0BW-11		71			355			FEMALE									355	0	Normal						enrollment			LIVING	TCGA-BH-A0BW-11		C4-BRCA/Basal							mutation c1uster 9	TCGA-BH-A0BW	TCGA Breast Cancer (BRCA)	breast invasive carcinoma	Breast					71	Left Lower Outer Quadrant
TCGA-BH-A0BZ-01	Stage IIIA	59	4	Stage IIIA	1492		Positive	FEMALE	Negative	1	1	4	Negative	M0	Positive	N1	1492	0	LumB	Luminal B	Positive	X	-2	-5	enrollment	T_Other	T3	LIVING	TCGA-BH-A0BZ-01	BRCA-LUAD+	C3-BRCA/Luminal	cluster 4	BRCA CIMP c7	BRCA nonbasal-like c8	BRCA nonbasal-like c7	miRNA cluster 13	cluster 6	mutation c1uster 10	TCGA-BH-A0BZ	TCGA Breast Cancer (BRCA)	breast invasive carcinoma	Breast					59	Left
TCGA-BH-A0BZ-11		59			1492			FEMALE									1492	0	Normal						enrollment			LIVING	TCGA-BH-A0BZ-11		C3-BRCA/Luminal							mutation c1uster 10	TCGA-BH-A0BZ	TCGA Breast Cancer (BRCA)	breast invasive carcinoma	Breast					59	Left
TCGA-BH-A0C0-01	Stage IIA	62	3	No_Conversion	1270		Positive	FEMALE	Positive	1	1	4	Negative	M0	Positive	N1	1270	0	LumB	Luminal B	Positive	Basal	-2	-5	followup	T1	T1	LIVING	TCGA-BH-A0C0-01	High	C3-BRCA/Luminal	cluster 4	BRCA CIMP c7	BRCA nonbasal-like c8	BRCA nonbasal-like c7	miRNA cluster 4	cluster 4	mutation cluster 5	TCGA-BH-A0C0	TCGA Breast Cancer (BRCA)	breast invasive carcinoma	Breast					62	Left Upper Outer Quadrant|Left	Axillary lymph node dissection alone
TCGA-BH-A0C0-11		62			1270			FEMALE									1270	0	Normal						followup			LIVING	TCGA-BH-A0C0-11		C3-BRCA/Luminal							mutation cluster 5	TCGA-BH-A0C0	TCGA Breast Cancer (BRCA)	breast invasive carcinoma	Breast					62	Left Upper Outer Quadrant|Left	Axillary lymph node dissection alone
TCGA-BH-A0C1-01	Stage IIIA	61	2	Stage IIIA	1338		Positive	FEMALE	Negative	1	3	3	Negative	M0	Positive	N2	1338	0	LumA	Luminal A	Positive	ReacII	-1	-1	enrollment	T_Other	T3	LIVING	TCGA-BH-A0C1-01	BRCA-LUAD+	C3-BRCA/Luminal	cluster 4	BRCA non-CIMP c9	KIRC-like c1	BRCA nonbasal-like c7	miRNA cluster 12	cluster 5	mutation c1uster 9	TCGA-BH-A0C1	TCGA Breast Cancer (BRCA)	breast invasive carcinoma	Breast					61	Right
TCGA-BH-A0C3-01	Stage I	47	3	Stage I	1464		Positive	FEMALE	Negative	3	3	4	Negative	M0	Negative	N0	1464	0	LumB	Luminal B	Negative	Her2	-4	0	enrollment	T1	T1	LIVING	TCGA-BH-A0C3-01	BRCA-LUAD+	C3-BRCA/Luminal	cluster 2	BRCA non-CIMP c9	BRCA nonbasal-like c8	BRCA nonbasal-like c7	miRNA cluster 13	cluster 6	mutation cluster 5	TCGA-BH-A0C3	TCGA Breast Cancer (BRCA)	breast invasive carcinoma	Breast					47	Left
TCGA-BH-A0C3-11		47			1464			FEMALE									1464	0	Normal						enrollment			LIVING	TCGA-BH-A0C3-11		C3-BRCA/Luminal							mutation cluster 5	TCGA-BH-A0C3	TCGA Breast Cancer (BRCA)	breast invasive carcinoma	Breast					47	Left
TCGA-BH-A0C7-01	Stage IIB	48	5	Stage IIB	1305		Positive	FEMALE	Positive	1	3	4	Negative	M0	Positive	N1	1305	0	LumB	Luminal B	Negative	LumA/B	0	-3	enrollment	T_Other	T2	LIVING	TCGA-BH-A0C7-01	BRCA-LUAD+	C3-BRCA/Luminal	cluster 4	BRCA CIMP c7	BRCA nonbasal-like c8	BRCA nonbasal-like c7	miRNA cluster 4	cluster 4	mutation c1uster 9	TCGA-BH-A0C7	TCGA Breast Cancer (BRCA)	breast invasive carcinoma	Breast					48	Left
TCGA-BH-A0DD-01	Stage IIB	58	3	Stage IIB	1393		Positive	MALE	Positive	1	3	4	Negative	M0	Positive	N1	1393	0	LumB	Luminal B	Positive	LumA/B	-6	-3	enrollment	T_Other	T2	LIVING	TCGA-BH-A0DD-01	High	C3-BRCA/Luminal	cluster 4	BRCA CIMP c7	BRCA nonbasal-like c8	BRCA nonbasal-like c7	miRNA cluster 4	cluster 4	mutation cluster 4	TCGA-BH-A0DD	TCGA Breast Cancer (BRCA)	breast invasive carcinoma	Breast					58	Right
TCGA-BH-A0DD-11		58			1393			MALE									1393	0	LumA						enrollment			LIVING	TCGA-BH-A0DD-11		C3-BRCA/Luminal							mutation cluster 4	TCGA-BH-A0DD	TCGA Breast Cancer (BRCA)	breast invasive carcinoma	Breast					58	Right
TCGA-BH-A0DE-01	Stage IIA	62	5	Stage IIA	948		Positive	FEMALE	Negative				Negative	M0	Negative	N0	948	0	LumA	Luminal A	Positive		-5	-7	enrollment	T_Other	T2	LIVING	TCGA-BH-A0DE-01	Kirc+	C3-BRCA/Luminal	cluster 4	BRCA CIMP c7		BRCA nonbasal-like c7	miRNA cluster 4	cluster 6	mutation cluster 4	TCGA-BH-A0DE	TCGA Breast Cancer (BRCA)	breast invasive carcinoma	Breast					62	Left Upper Outer Quadrant
TCGA-BH-A0DE-11		62			948			FEMALE									948	0							enrollment			LIVING	TCGA-BH-A0DE-11		C3-BRCA/Luminal							mutation cluster 4	TCGA-BH-A0DE	TCGA Breast Cancer (BRCA)	breast invasive carcinoma	Breast					62	Left Upper Outer Quadrant
TCGA-BH-A0DG-01	Stage IIA	30	3	Stage IIA	713		Positive	FEMALE	Negative	1	4	3	Negative	M0	Negative	N0	713	0	LumA	Luminal A	Negative	ReacI	-4	-4	enrollment	T_Other	T2	LIVING	TCGA-BH-A0DG-01	BRCA-LUAD+	C3-BRCA/Luminal	cluster 1	BRCA non-CIMP c9	BRCA nonbasal-like c8	BRCA nonbasal-like c7	miRNA cluster 4	cluster 4	mutation c1uster 9	TCGA-BH-A0DG	TCGA Breast Cancer (BRCA)	breast invasive carcinoma	Breast					30	Right Upper Outer Quadrant
TCGA-BH-A0DG-11		30			713			FEMALE									713	0	Normal						enrollment			LIVING	TCGA-BH-A0DG-11		C3-BRCA/Luminal							mutation c1uster 9	TCGA-BH-A0DG	TCGA Breast Cancer (BRCA)	breast invasive carcinoma	Breast					30	Right Upper Outer Quadrant
TCGA-BH-A0DH-01	Stage IIB	63	2	No_Conversion	1156		Positive	FEMALE	Negative	5	3	3	Negative	M0	Positive	N1	1156	0	LumA	Luminal A	Positive	X	0	-3	followup	T_Other	T2	LIVING	TCGA-BH-A0DH-01	Kirc+	C3-BRCA/Luminal	cluster 3	BRCA CIMP c7	BRCA nonbasal-like c8	BRCA nonbasal-like c7	miRNA cluster 6	cluster 1	mutation c1uster 9	TCGA-BH-A0DH	TCGA Breast Cancer (BRCA)	breast invasive carcinoma	Breast					63	Left Upper Outer Quadrant|Left	Axillary lymph node dissection alone
TCGA-BH-A0DH-11		63			1156			FEMALE									1156	0	Normal						followup			LIVING	TCGA-BH-A0DH-11		C3-BRCA/Luminal							mutation c1uster 9	TCGA-BH-A0DH	TCGA Breast Cancer (BRCA)	breast invasive carcinoma	Breast					63	Left Upper Outer Quadrant|Left	Axillary lymph node dissection alone
TCGA-BH-A0DI-01	Stage IIB	63	5	Stage IIB	673		Positive	FEMALE	Negative	1	4	3	Negative	M0	Positive	N1	673	0	LumA	Luminal A	Positive	ReacI	-5	-7	enrollment	T_Other	T2	LIVING	TCGA-BH-A0DI-01	Squamous	C3-BRCA/Luminal	cluster 1	BRCA CIMP c7	BRCA nonbasal-like c8	BRCA nonbasal-like c7	miRNA cluster 4	cluster 4	mutation cluster 3	TCGA-BH-A0DI	TCGA Breast Cancer (BRCA)	breast invasive carcinoma	Breast					63	Right
TCGA-BH-A0DI-11		63			673			FEMALE									673	0							enrollment			LIVING	TCGA-BH-A0DI-11		C3-BRCA/Luminal							mutation cluster 3	TCGA-BH-A0DI	TCGA Breast Cancer (BRCA)	breast invasive carcinoma	Breast					63	Right
TCGA-BH-A0DK-01	Stage IIA	49	2	Stage IIA	423		Positive	FEMALE	Negative	4	3	3	Negative	M0	Negative	N0	423	0	LumA	Luminal A	Positive	LumA/B	-4	-4	followup	T_Other	T2	LIVING	TCGA-BH-A0DK-01	High	C3-BRCA/Luminal	cluster 3	BRCA CIMP c7	BRCA nonbasal-like c8	BRCA nonbasal-like c7	miRNA cluster 14	cluster 2	mutation cluster 4	TCGA-BH-A0DK	TCGA Breast Cancer (BRCA)	breast invasive carcinoma	Breast					49	Left Upper Outer Quadrant|Left	Sentinel node biopsy alone
TCGA-BH-A0DK-11		49			423			FEMALE									423	0	LumA						followup			LIVING	TCGA-BH-A0DK-11		C3-BRCA/Luminal							mutation cluster 4	TCGA-BH-A0DK	TCGA Breast Cancer (BRCA)	breast invasive carcinoma	Breast					49	Left Upper Outer Quadrant|Left	Sentinel node biopsy alone
TCGA-BH-A0DL-01	Stage IIA	64	3	Stage IIA	1467		Positive	FEMALE	Negative	2	2	2	Negative	M0	Negative	N0	1467	0	Basal	Basal-like	Negative	Basal	-13	0	enrollment	T_Other	T2	LIVING	TCGA-BH-A0DL-01	High	C4-BRCA/Basal	cluster 5	BRCA basal-like c8	squamous c3	BRCA basal-like c8	miRNA cluster 11	cluster 4	mutation cluster 3	TCGA-BH-A0DL	TCGA Breast Cancer (BRCA)	breast invasive carcinoma	Breast					64	Left
TCGA-BH-A0DL-11		64			1467			FEMALE									1467	0	Normal						enrollment			LIVING	TCGA-BH-A0DL-11		C4-BRCA/Basal							mutation cluster 3	TCGA-BH-A0DL	TCGA Breast Cancer (BRCA)	breast invasive carcinoma	Breast					64	Left
TCGA-BH-A0DO-01	Stage I	78	2	Stage I	525		Positive	FEMALE	Negative				Negative	M0	Negative	N0	525	0	LumA	Luminal A	Positive		-5	-7	enrollment	T1	T1	LIVING	TCGA-BH-A0DO-01	Iq	C3-BRCA/Luminal	cluster 1	BRCA non-CIMP c9		BRCA nonbasal-like c7	miRNA cluster 14	cluster 6	mutation cluster 4	TCGA-BH-A0DO	TCGA Breast Cancer (BRCA)	breast invasive carcinoma	Breast					78	Left Upper Inner Quadrant
TCGA-BH-A0DO-11		78			525			FEMALE									525	0	Normal						enrollment			LIVING	TCGA-BH-A0DO-11		C3-BRCA/Luminal							mutation cluster 4	TCGA-BH-A0DO	TCGA Breast Cancer (BRCA)	breast invasive carcinoma	Breast					78	Left Upper Inner Quadrant
TCGA-BH-A0DP-01	Stage IIB	60	2	Stage IIB	476		Positive	FEMALE	Negative	1	4	3	Negative	M0	Negative	N0	476	0	LumA	Luminal A	Positive	ReacI	-5	-7	followup	T_Other	T3	LIVING	TCGA-BH-A0DP-01	BRCA-LUAD+	C3-BRCA/Luminal	cluster 4	BRCA CIMP c7	KIRC-like c1	BRCA nonbasal-like c7	miRNA cluster 3	cluster 2	mutation cluster 4	TCGA-BH-A0DP	TCGA Breast Cancer (BRCA)	breast invasive carcinoma	Breast					60	Right	Sentinel node biopsy alone
TCGA-BH-A0DP-11		60			476			FEMALE									476	0	Normal						followup			LIVING	TCGA-BH-A0DP-11		C3-BRCA/Luminal							mutation cluster 4	TCGA-BH-A0DP	TCGA Breast Cancer (BRCA)	breast invasive carcinoma	Breast					60	Right	Sentinel node biopsy alone
TCGA-BH-A0DQ-01	Stage IIB	42	5	No_Conversion	98		Positive	FEMALE	Negative				Negative	M0	Positive	N1	98	0	LumA	Luminal A	Positive		-5	0	followup	T_Other	T2	LIVING	TCGA-BH-A0DQ-01	High	C3-BRCA/Luminal	cluster 2	BRCA non-CIMP c9		BRCA nonbasal-like c7	miRNA cluster 4	cluster 6	mutation c1uster 9	TCGA-BH-A0DQ	TCGA Breast Cancer (BRCA)	breast invasive carcinoma	Breast					42	Right Upper Inner Quadrant|Right	Sentinel lymph node biopsy plus axillary dissection
TCGA-BH-A0DQ-11		42			98			FEMALE									98	0	LumA						followup			LIVING	TCGA-BH-A0DQ-11		C3-BRCA/Luminal							mutation c1uster 9	TCGA-BH-A0DQ	TCGA Breast Cancer (BRCA)	breast invasive carcinoma	Breast					42	Right Upper Inner Quadrant|Right	Sentinel lymph node biopsy plus axillary dissection
TCGA-BH-A0DS-01	Stage IIIA	71	3	No_Conversion	77		Positive	FEMALE	Negative	4	5	3	Negative	M0	Positive	N2	77	0	LumA	Luminal A	Positive	LumA	-5	-7	followup	T_Other	T2	LIVING	TCGA-BH-A0DS-01	BRCA-LUAD+	C3-BRCA/Luminal	cluster 3	BRCA CIMP c7	BRCA nonbasal-like c8	BRCA nonbasal-like c7	miRNA cluster 12	cluster 6	mutation c1uster 9	TCGA-BH-A0DS	TCGA Breast Cancer (BRCA)	breast invasive carcinoma	Breast					71	Right Upper Inner Quadrant|Right Lower Inner Quadrant|Right	Sentinel lymph node biopsy plus axillary dissection
TCGA-BH-A0DT-01	Stage IIA	41	2	Stage IIA	1170		Positive	FEMALE	Negative	3	4	3	Negative	M0	Positive	N1	1170	0	LumA	Luminal A	Positive	LumA	-5	-7	enrollment	T1	T1	LIVING	TCGA-BH-A0DT-01	BRCA-LUAD+	C3-BRCA/Luminal	cluster 1	BRCA non-CIMP c9	BRCA nonbasal-like c8	BRCA nonbasal-like c7	miRNA cluster 4	cluster 6	mutation cluster 4	TCGA-BH-A0DT	TCGA Breast Cancer (BRCA)	breast invasive carcinoma	Breast					41	Right
TCGA-BH-A0DT-11		41			1170			FEMALE									1170	0	Normal						enrollment			LIVING	TCGA-BH-A0DT-11		C3-BRCA/Luminal							mutation cluster 4	TCGA-BH-A0DT	TCGA Breast Cancer (BRCA)	breast invasive carcinoma	Breast					41	Right
TCGA-BH-A0DV-01	Stage IIIA	54	3	Stage IIIA	1374		Positive	FEMALE	Negative				Negative	M0	Positive	N2	1374	0	LumA		Positive	ReacII			enrollment	T_Other	T2	LIVING	TCGA-BH-A0DV-01	Iq	C3-BRCA/Luminal	cluster 1	BRCA non-CIMP c9	BRCA nonbasal-like c8	BRCA nonbasal-like c7	miRNA cluster 3	cluster 6	mutation cluster 4	TCGA-BH-A0DV	TCGA Breast Cancer (BRCA)	breast invasive carcinoma	Breast					54	Left Upper Inner Quadrant|Left Lower Inner Quadrant|Left Lower Outer Quadrant|Left
TCGA-BH-A0DV-11		54			1374			FEMALE									1374	0	Normal						enrollment			LIVING	TCGA-BH-A0DV-11		C3-BRCA/Luminal							mutation cluster 4	TCGA-BH-A0DV	TCGA Breast Cancer (BRCA)	breast invasive carcinoma	Breast					54	Left Upper Inner Quadrant|Left Lower Inner Quadrant|Left Lower Outer Quadrant|Left
TCGA-BH-A0DX-01	Stage I	62	1	Stage I	1442		Positive	FEMALE	Negative				Negative	M0	Negative	N0	1442	0	LumA	Luminal A	Positive		-4	-7	enrollment	T1	T1	LIVING	TCGA-BH-A0DX-01	BRCA-LUAD+	C3-BRCA/Luminal	cluster 1	BRCA non-CIMP c9		BRCA nonbasal-like c7	miRNA c1uster 9	cluster 6	mutation cluster 4	TCGA-BH-A0DX	TCGA Breast Cancer (BRCA)	breast invasive carcinoma	Breast					62	Left Upper Inner Quadrant
TCGA-BH-A0DZ-01	Stage IIB	43	5	No_Conversion	495		Positive	FEMALE	Positive				Negative	M0	Positive	N1	495	0	LumA	HER2-enriched	Positive		-2	-3	followup	T_Other	T2	LIVING	TCGA-BH-A0DZ-01	Squamous	C3-BRCA/Luminal	cluster 4	BRCA CIMP c7		BRCA nonbasal-like c7	miRNA cluster 4	cluster 4	mutation cluster 2	TCGA-BH-A0DZ	TCGA Breast Cancer (BRCA)	breast invasive carcinoma	Breast					43	Right Upper Inner Quadrant|Right Upper Outer Quadrant|Right Lower Inner Quadrant|Right Lower Outer Quadrant|Right	Sentinel lymph node biopsy plus axillary dissection
TCGA-BH-A0DZ-11		43			495			FEMALE									495	0							followup			LIVING	TCGA-BH-A0DZ-11		C3-BRCA/Luminal							mutation cluster 2	TCGA-BH-A0DZ	TCGA Breast Cancer (BRCA)	breast invasive carcinoma	Breast					43	Right Upper Inner Quadrant|Right Upper Outer Quadrant|Right Lower Inner Quadrant|Right Lower Outer Quadrant|Right	Sentinel lymph node biopsy plus axillary dissection
TCGA-BH-A0E0-01	Stage IIIC	38	1	No_Conversion	133		Negative	FEMALE	Negative	2	2	2	Negative	M0	Positive	N3	133	0	Basal	Basal-like	Negative	Basal	-13	0	followup	T_Other	T3	LIVING	TCGA-BH-A0E0-01	High	C4-BRCA/Basal	cluster 5	BRCA basal-like c8	BRCA basal-like c6	BRCA basal-like c8	miRNA cluster 11	cluster 5	mutation cluster 5	TCGA-BH-A0E0	TCGA Breast Cancer (BRCA)	breast invasive carcinoma	Breast					38	Left Upper Outer Quadrant|Left Lower Outer Quadrant|Left	Axillary lymph node dissection alone
TCGA-BH-A0E0-11		38			133			FEMALE									133	0	Normal						followup			LIVING	TCGA-BH-A0E0-11		C4-BRCA/Basal							mutation cluster 5	TCGA-BH-A0E0	TCGA Breast Cancer (BRCA)	breast invasive carcinoma	Breast					38	Left Upper Outer Quadrant|Left Lower Outer Quadrant|Left	Axillary lymph node dissection alone
TCGA-BH-A0E1-01	Stage IIB	52	2	No_Conversion	477		Positive	FEMALE	Negative	3	3	3	Negative	M0	Positive	N1	477	0	LumA	Luminal A	Positive	ReacII	-12	-3	followup	T_Other	T2	LIVING	TCGA-BH-A0E1-01	BRCA-LUAD+	C3-BRCA/Luminal	cluster 2	BRCA non-CIMP c9	KIRC-like c1	BRCA nonbasal-like c7	miRNA cluster 3	cluster 6	mutation c1uster 10	TCGA-BH-A0E1	TCGA Breast Cancer (BRCA)	breast invasive carcinoma	Breast					52	Left Upper Inner Quadrant|Left	Sentinel lymph node biopsy plus axillary dissection
TCGA-BH-A0E1-11		52			477			FEMALE									477	0	Normal						followup			LIVING	TCGA-BH-A0E1-11		C3-BRCA/Luminal							mutation c1uster 10	TCGA-BH-A0E1	TCGA Breast Cancer (BRCA)	breast invasive carcinoma	Breast					52	Left Upper Inner Quadrant|Left	Sentinel lymph node biopsy plus axillary dissection
TCGA-BH-A0E2-01	Stage IIIA	49	2	No_Conversion	435		Positive	FEMALE	Negative				Negative	M0	Positive	N2	435	0	LumA	Luminal A	Positive	LumA/B	-8	-3	followup	T_Other	T2	LIVING	TCGA-BH-A0E2-01	Kirc+	C3-BRCA/Luminal	cluster 4	BRCA CIMP c7	BRCA nonbasal-like c8	BRCA nonbasal-like c7			mutation c1uster 9	TCGA-BH-A0E2	TCGA Breast Cancer (BRCA)	breast invasive carcinoma	Breast					49	Right Upper Inner Quadrant|Right	Axillary lymph node dissection alone
TCGA-BH-A0E6-01	Stage IA	69	1	Stage I	292		Negative	FEMALE	Negative	1	4	3	Negative	M0	Negative	N0	292	0	Basal	Basal-like	Negative	ReacI	-13	0	followup	T1	T1	LIVING	TCGA-BH-A0E6-01	High	C4-BRCA/Basal	cluster 1	BRCA basal-like c8	OV-like c4	BRCA basal-like c8	miRNA cluster 12	cluster 4	mutation cluster 2	TCGA-BH-A0E6	TCGA Breast Cancer (BRCA)	breast invasive carcinoma	Breast					69	Left Upper Inner Quadrant|Left Upper Outer Quadrant|Left	Sentinel node biopsy alone
TCGA-BH-A0E7-01	Stage IIB	79	4	No_Conversion	1362		Positive	FEMALE	Negative	3	3	3	Negative	M0	Positive	N1	1362	0	LumA	Luminal A	Positive	LumA	-12	-3	followup	T_Other	T2	LIVING	TCGA-BH-A0E7-01	Kirc+	C3-BRCA/Luminal	cluster 2	BRCA non-CIMP c9	BRCA nonbasal-like c8	BRCA nonbasal-like c7	miRNA cluster 14	cluster 2	mutation c1uster 9	TCGA-BH-A0E7	TCGA Breast Cancer (BRCA)	breast invasive carcinoma	Breast	NO	NO	NO	NO	79	Left Upper Outer Quadrant|Left	Axillary lymph node dissection alone
TCGA-BH-A0E9-01	Stage IIB	53	3	Stage IIB	1405		Positive	FEMALE	Negative	3	4	3	Negative	M0	Positive	N1	1405	0	LumA	Luminal A	Positive	ReacI	-5	-7	enrollment	T_Other	T2	LIVING	TCGA-BH-A0E9-01	BRCA-LUAD+	C3-BRCA/Luminal	cluster 1	BRCA non-CIMP c9	BRCA nonbasal-like c8	BRCA nonbasal-like c7	miRNA cluster 3	cluster 6	mutation c1uster 9	TCGA-BH-A0E9	TCGA Breast Cancer (BRCA)	breast invasive carcinoma	Breast					53	Right
TCGA-BH-A0EA-01	Stage IIA	72	2	Stage IIA	831	993	Positive	FEMALE	Negative	3	4	3	Negative	M0	Positive	N1	993	1	LumA	Luminal A	Positive	ReacI	-5	-7	enrollment	T1	T1	DECEASED	TCGA-BH-A0EA-01	Iq	C3-BRCA/Luminal	cluster 1	BRCA non-CIMP c9	BRCA nonbasal-like c8	BRCA nonbasal-like c7	miRNA c1uster 9	cluster 6	mutation cluster 4	TCGA-BH-A0EA	TCGA Breast Cancer (BRCA)	breast invasive carcinoma	Breast					72	Left
TCGA-BH-A0EB-01	Stage IA	69	2	Stage I	745		Positive	FEMALE	Negative				Negative	M0	Negative	N0	745	0	LumA	Luminal A	Positive	LumA	-12	-4	followup	T1	T1	LIVING	TCGA-BH-A0EB-01	BRCA-LUAD+	C3-BRCA/Luminal	cluster 1	BRCA non-CIMP c9	BRCA nonbasal-like c8	BRCA nonbasal-like c7			mutation cluster 4	TCGA-BH-A0EB	TCGA Breast Cancer (BRCA)	breast invasive carcinoma	Breast	NO	NO	NO	NO	69	Right Lower Inner Quadrant|Right	Sentinel lymph node biopsy plus axillary dissection
TCGA-BH-A0EE-01	Stage IIB	68	5	Stage IIB	943		Negative	FEMALE	Positive	2	3	1	Negative	M0	Negative	N0	943	0	Her2	HER2-enriched	Negative	Basal	-11	-9	followup	T_Other	T3	LIVING	TCGA-BH-A0EE-01	High	C3-BRCA/Luminal	cluster 1	Cluster 6	BRCA basal-like c6	BRCA nonbasal-like c7	miRNA c1uster 10	cluster 7	mutation cluster 4	TCGA-BH-A0EE	TCGA Breast Cancer (BRCA)	breast invasive carcinoma	Breast	NO	NO	NO	NO	68	Right Upper Inner Quadrant|Right	Sentinel node biopsy alone
TCGA-BH-A0EI-01	Stage IIA	51	5	Stage IIA	743		Positive	FEMALE	Negative	1	3	3	Negative	M0	Positive	N1	743	0	LumA	Luminal A	Positive	LumA	-5	-7	enrollment	T1	T1	LIVING	TCGA-BH-A0EI-01	Kirc+	C3-BRCA/Luminal	cluster 4	BRCA CIMP c7	BRCA nonbasal-like c8	BRCA nonbasal-like c7	miRNA cluster 4	cluster 4	mutation c1uster 9	TCGA-BH-A0EI	TCGA Breast Cancer (BRCA)	breast invasive carcinoma	Breast					51	Right
TCGA-BH-A0GY-01	Stage IIA	67	3	No_Conversion	923		Positive	FEMALE	Negative	3	3	3	Negative	M0	Positive	N1	923	0	LumA	Luminal A	Positive	ReacI	-3	-3	followup	T_Other	T2	LIVING	TCGA-BH-A0GY-01	High	C3-BRCA/Luminal	cluster 2	BRCA non-CIMP c9	BRCA nonbasal-like c8	BRCA nonbasal-like c7	miRNA cluster 4	cluster 5	mutation cluster 3	TCGA-BH-A0GY	TCGA Breast Cancer (BRCA)	breast invasive carcinoma	Breast	NO	NO	NO	NO	67	Left Lower Outer Quadrant|Left	Sentinel lymph node biopsy plus axillary dissection
TCGA-BH-A0GZ-01	Stage IIA	62	3	No_Conversion	328		Positive	FEMALE	Negative				Negative	M0	Positive	N1	328	0	LumA	Luminal A	Positive		0	-3	followup	T1	T1	LIVING	TCGA-BH-A0GZ-01	BRCA-LUAD+	C3-BRCA/Luminal	cluster 4	BRCA CIMP c7		BRCA nonbasal-like c7	miRNA cluster 14	cluster 2	mutation c1uster 9	TCGA-BH-A0GZ	TCGA Breast Cancer (BRCA)	breast invasive carcinoma	Breast	NO	NO	NO	NO	62	Left Upper Inner Quadrant|Left	Sentinel lymph node biopsy plus axillary dissection
TCGA-BH-A0H0-01	Stage IA	69	2	Stage I	461		Positive	FEMALE	Negative				Negative	M0	Negative	N0	461	0	LumB	Luminal B	Positive		-10	-3	followup	T1	T1	LIVING	TCGA-BH-A0H0-01	Squamous	C3-BRCA/Luminal	cluster 4	BRCA non-CIMP c9		BRCA nonbasal-like c7	miRNA cluster 3	cluster 2	mutation c1uster 9	TCGA-BH-A0H0	TCGA Breast Cancer (BRCA)	breast invasive carcinoma	Breast					69	Right Upper Outer Quadrant|Right	Sentinel node biopsy alone
TCGA-BH-A0H3-01	Stage I	46	2	Stage I	1149		Positive	FEMALE	Negative				Negative	M0	Negative	N0	1149	0	LumA	Luminal A	Positive		-2	-4	enrollment	T1	T1	LIVING	TCGA-BH-A0H3-01	Iq	C3-BRCA/Luminal	cluster 2	BRCA non-CIMP c9		BRCA nonbasal-like c7	miRNA cluster 3	cluster 6	mutation cluster 4	TCGA-BH-A0H3	TCGA Breast Cancer (BRCA)	breast invasive carcinoma	Breast					46	Left Upper Outer Quadrant
TCGA-BH-A0H5-01	Stage I	45	1	Stage I	1080		Positive	FEMALE	Negative	2	2	1	Negative	M0	Negative	N0	1080	0	LumA	Luminal A	Positive	Basal	-2	-5	enrollment	T1	T1	LIVING	TCGA-BH-A0H5-01	Quiet	C3-BRCA/Luminal	cluster 1	BRCA non-CIMP c9	BRCA nonbasal-like c8	BRCA nonbasal-like c7	miRNA cluster 7	cluster 3	mutation c1uster 9	TCGA-BH-A0H5	TCGA Breast Cancer (BRCA)	breast invasive carcinoma	Breast					45	Right Upper Outer Quadrant
TCGA-BH-A0H5-11		45			1080			FEMALE									1080	0	Normal						enrollment			LIVING	TCGA-BH-A0H5-11		C3-BRCA/Luminal							mutation c1uster 9	TCGA-BH-A0H5	TCGA Breast Cancer (BRCA)	breast invasive carcinoma	Breast					45	Right Upper Outer Quadrant
TCGA-BH-A0H6-01	Stage IA	82	4	No_Conversion	747		Positive	FEMALE	Negative	3	3	3	Negative	M0	Negative	N0	747	0	LumA	Luminal A	Positive	ReacI	-5	-3	followup	T1	T1	LIVING	TCGA-BH-A0H6-01	Kirc+	C3-BRCA/Luminal	cluster 2	BRCA non-CIMP c9	BRCA nonbasal-like c8	BRCA nonbasal-like c7	miRNA cluster 14	cluster 2	mutation c1uster 9	TCGA-BH-A0H6	TCGA Breast Cancer (BRCA)	breast invasive carcinoma	Breast					82	Right Upper Inner Quadrant|Right Upper Outer Quadrant|Right	No axillary staging
TCGA-BH-A0H7-01	Stage IIIA	65	3	No_Conversion	701		Positive	FEMALE	Negative	1	3	3	Negative	M0	Positive	N2	701	0	LumA	Luminal A	Positive	ReacII	-3	-3	followup	T1	T1	LIVING	TCGA-BH-A0H7-01	High	C3-BRCA/Luminal	cluster 4	BRCA CIMP c7	KIRC-like c1	BRCA nonbasal-like c7	miRNA cluster 6	cluster 4	mutation cluster 5	TCGA-BH-A0H7	TCGA Breast Cancer (BRCA)	breast invasive carcinoma	Breast					65	Right Upper Inner Quadrant|Right Upper Outer Quadrant|Right Lower Inner Quadrant|Right Lower Outer Quadrant|Right	Axillary lymph node dissection alone
TCGA-BH-A0H7-11		65			701			FEMALE									701	0	Normal						followup			LIVING	TCGA-BH-A0H7-11		C3-BRCA/Luminal							mutation cluster 5	TCGA-BH-A0H7	TCGA Breast Cancer (BRCA)	breast invasive carcinoma	Breast					65	Right Upper Inner Quadrant|Right Upper Outer Quadrant|Right Lower Inner Quadrant|Right Lower Outer Quadrant|Right	Axillary lymph node dissection alone
TCGA-BH-A0H9-01	Stage IIA	69	1	Stage IIA	1247		Positive	FEMALE	Negative	2	2	2	Negative	M0	Negative	N0	1247	0	LumA	Luminal A	Positive	LumA/B	-3	-3	followup	T_Other	T2	LIVING	TCGA-BH-A0H9-01	Iq	C3-BRCA/Luminal	cluster 5	Low purity c2	BRCA nonbasal-like c8	BRCA nonbasal-like c7	miRNA cluster 4	cluster 6	mutation cluster 14	TCGA-BH-A0H9	TCGA Breast Cancer (BRCA)	breast invasive carcinoma	Breast					69	Right Upper Outer Quadrant|Right	Sentinel node biopsy alone
TCGA-BH-A0H9-11		69			1247			FEMALE									1247	0							followup			LIVING	TCGA-BH-A0H9-11		C3-BRCA/Luminal							mutation cluster 14	TCGA-BH-A0H9	TCGA Breast Cancer (BRCA)	breast invasive carcinoma	Breast					69	Right Upper Outer Quadrant|Right	Sentinel node biopsy alone
TCGA-BH-A0HA-01	Stage I	31	1	Stage I	856		Positive	FEMALE	Negative	3	4	3	Negative	M0	Negative	N0	856	0	LumA	Luminal A	Positive	ReacI	-5	-7	enrollment	T1	T1	LIVING	TCGA-BH-A0HA-01	Kirc+	C3-BRCA/Luminal	cluster 2	BRCA non-CIMP c9	BRCA nonbasal-like c8	BRCA nonbasal-like c7	miRNA cluster 14	cluster 6	mutation cluster 4	TCGA-BH-A0HA	TCGA Breast Cancer (BRCA)	breast invasive carcinoma	Breast					31	Right
TCGA-BH-A0HA-11		31			856			FEMALE									856	0	Normal						enrollment			LIVING	TCGA-BH-A0HA-11		C3-BRCA/Luminal							mutation cluster 4	TCGA-BH-A0HA	TCGA Breast Cancer (BRCA)	breast invasive carcinoma	Breast					31	Right
TCGA-BH-A0HB-01	Stage IA	55	5	Stage I	806		Positive	FEMALE	Negative				Negative	M0	Negative	N0	806	0	LumA	Luminal A	Positive		-8	-3	followup	T1	T1	LIVING	TCGA-BH-A0HB-01	BRCA-LUAD+	C3-BRCA/Luminal	cluster 1	BRCA non-CIMP c9		BRCA nonbasal-like c7	miRNA cluster 4	cluster 4	mutation cluster 14	TCGA-BH-A0HB	TCGA Breast Cancer (BRCA)	breast invasive carcinoma	Breast					55	Right Upper Outer Quadrant|Right	Sentinel node biopsy alone
TCGA-BH-A0HF-01	Stage IA	77		Stage I	727		Positive	FEMALE	Negative				Negative	M0	Negative	N0	727	0	LumA	Luminal A	Positive		-5	-7	followup	T1	T1	LIVING	TCGA-BH-A0HF-01			cluster 2	BRCA non-CIMP c9		BRCA nonbasal-like c7	miRNA cluster 4	cluster 4		TCGA-BH-A0HF	TCGA Breast Cancer (BRCA)	breast invasive carcinoma	Breast					77	Right Upper Outer Quadrant|Right	Sentinel node biopsy alone
TCGA-BH-A0HI-01	Stage IA	78	2	Stage I	619		Positive	FEMALE	Negative				Negative	M0	Negative	N0	619	0	LumA	Luminal A	Positive		-12	-3	followup	T1	T1	LIVING	TCGA-BH-A0HI-01	Iq	C3-BRCA/Luminal	cluster 2	BRCA non-CIMP c9		BRCA nonbasal-like c7	miRNA c1uster 10	cluster 7	mutation cluster 4	TCGA-BH-A0HI	TCGA Breast Cancer (BRCA)	breast invasive carcinoma	Breast					78	Right Upper Inner Quadrant|Right Lower Inner Quadrant|Right	Sentinel node biopsy alone
TCGA-BH-A0HK-01	Stage IIB	81	2	No_Conversion	178		Positive	FEMALE	Negative	3	3	3	Negative	M0	Positive	N1	178	0	LumA	Luminal A	Negative	LumA/B	0	0	followup	T_Other	T2	LIVING	TCGA-BH-A0HK-01	Iq	C3-BRCA/Luminal	cluster 3	BRCA CIMP c7	BRCA nonbasal-like c8	BRCA nonbasal-like c7	miRNA c1uster 10	cluster 7	mutation c1uster 9	TCGA-BH-A0HK	TCGA Breast Cancer (BRCA)	breast invasive carcinoma	Breast					81	Right Upper Inner Quadrant|Right	Axillary lymph node dissection alone
TCGA-BH-A0HK-11		81			178			FEMALE									178	0	Normal						followup			LIVING	TCGA-BH-A0HK-11		C3-BRCA/Luminal							mutation c1uster 9	TCGA-BH-A0HK	TCGA Breast Cancer (BRCA)	breast invasive carcinoma	Breast					81	Right Upper Inner Quadrant|Right	Axillary lymph node dissection alone
TCGA-BH-A0HL-01	Stage IIB	56		No_Conversion	72		Positive	FEMALE	Negative				Negative	M0	Positive	N1	72	0		Basal-like	Positive	LumA/B	-13	0	followup	T_Other	T2	LIVING	TCGA-BH-A0HL-01			cluster 3	BRCA CIMP c7	BRCA nonbasal-like c8		miRNA cluster 11	cluster 4	mutation c1uster 9	TCGA-BH-A0HL	TCGA Breast Cancer (BRCA)	breast invasive carcinoma	Breast					56	Right Lower Inner Quadrant|Right Lower Outer Quadrant|Right	Sentinel lymph node biopsy plus axillary dissection
TCGA-BH-A0HN-01	Stage IA	67		Stage I	516		Positive	FEMALE	Negative				Negative	M0	Negative	N0	516	0		Basal-like	Positive	ReacI	-13	0	followup	T1	T1	LIVING	TCGA-BH-A0HN-01			cluster 2	BRCA non-CIMP c9	BRCA nonbasal-like c8		miRNA cluster 11	cluster 6	mutation cluster 14	TCGA-BH-A0HN	TCGA Breast Cancer (BRCA)	breast invasive carcinoma	Breast					67	Left Upper Inner Quadrant|Left Upper Outer Quadrant|Left	Sentinel node biopsy alone
TCGA-BH-A0HO-01	Stage IIA	48	2	No_Conversion	76		Positive	FEMALE	Negative				Negative	M0	Positive	N1	76	0	LumA	Luminal A	Positive		-12	-3	followup	T1	T1	LIVING	TCGA-BH-A0HO-01	Iq	C3-BRCA/Luminal	cluster 2	BRCA non-CIMP c9		BRCA nonbasal-like c7	miRNA cluster 6	cluster 2	mutation c1uster 9	TCGA-BH-A0HO	TCGA Breast Cancer (BRCA)	breast invasive carcinoma	Breast					48	Right Upper Outer Quadrant|Right	Sentinel lymph node biopsy plus axillary dissection
TCGA-BH-A0HP-01	Stage IIIA	65	2	No_Conversion	414		Positive	FEMALE	Negative	3	4	3	Negative	M0	Positive	N2	414	0	LumA	Luminal A	Negative	ReacI	-5	-7	followup	T_Other	T3	LIVING	TCGA-BH-A0HP-01	Iq	C3-BRCA/Luminal	cluster 1	BRCA CIMP c7	BRCA nonbasal-like c8	BRCA nonbasal-like c7	miRNA cluster 13	cluster 6	mutation c1uster 9	TCGA-BH-A0HP	TCGA Breast Cancer (BRCA)	breast invasive carcinoma	Breast					65	Left Upper Inner Quadrant|Left Upper Outer Quadrant|Left Lower Inner Quadrant|Left Lower Outer Quadrant|Left	Axillary lymph node dissection alone
TCGA-BH-A0HQ-01	Stage IIA	56		Stage IIA	1121		Positive	FEMALE	Negative				Negative	M0	Negative	N0	1121	0	LumA	Luminal A	Positive		-5	-3	followup	T_Other	T2	LIVING	TCGA-BH-A0HQ-01	BRCA-LUAD+	C3-BRCA/Luminal	cluster 4	BRCA CIMP c7		BRCA nonbasal-like c7	miRNA cluster 14	cluster 2	mutation c1uster 9	TCGA-BH-A0HQ	TCGA Breast Cancer (BRCA)	breast invasive carcinoma	Breast					56	Left Upper Outer Quadrant|Left	Sentinel node biopsy alone
TCGA-BH-A0HU-01	Stage IA	52	2	Stage I	392		Positive	FEMALE	Negative	3	1	4	Negative	M0	Negative	N0	392	0	LumB	Luminal B	Positive	Her2	-2	-3	followup	T1	T1	LIVING	TCGA-BH-A0HU-01	Squamous	C3-BRCA/Luminal	cluster 2	BRCA non-CIMP c9	BRCA nonbasal-like c8	BRCA nonbasal-like c7	miRNA cluster 14	cluster 4	mutation cluster 4	TCGA-BH-A0HU	TCGA Breast Cancer (BRCA)	breast invasive carcinoma	Breast					52	Right Upper Outer Quadrant|Right	Sentinel node biopsy alone
TCGA-BH-A0HW-01	Stage IA	62	4	Stage I	1560		Positive	FEMALE	Negative	3	3	4	Negative	M0	Negative	N0	1560	0	LumB	Luminal B	Negative	LumA/B	-10	-3	followup	T1	T1	LIVING	TCGA-BH-A0HW-01	Squamous	C3-BRCA/Luminal	cluster 2	BRCA CIMP c7	BRCA nonbasal-like c8	BRCA nonbasal-like c7	miRNA cluster 14	cluster 2	mutation c1uster 9	TCGA-BH-A0HW	TCGA Breast Cancer (BRCA)	breast invasive carcinoma	Breast					62	Left Lower Inner Quadrant|Left Lower Outer Quadrant|Left	Sentinel node biopsy alone
TCGA-BH-A0HX-01	Stage IIB	54	4	No_Conversion	829		Positive	FEMALE	Negative	1	3	3	Negative	M0	Positive	N1	829	0	LumA	Luminal A	Positive	LumA/B	-10	-3	followup	T_Other	T2	LIVING	TCGA-BH-A0HX-01	High	C3-BRCA/Luminal	cluster 4	BRCA CIMP c7	BRCA nonbasal-like c8	BRCA nonbasal-like c7	miRNA cluster 4	cluster 4	mutation cluster 5	TCGA-BH-A0HX	TCGA Breast Cancer (BRCA)	breast invasive carcinoma	Breast					54	Left Upper Inner Quadrant|Left Upper Outer Quadrant|Left Lower Inner Quadrant|Left Lower Outer Quadrant|Left	Sentinel lymph node biopsy plus axillary dissection
TCGA-BH-A0HY-01	Stage I	60		Stage I	867		Positive	FEMALE					Negative	M0	Negative	N0	867	0	LumB	HER2-enriched	Negative	ReacII	-1	-5	enrollment	T1	T1	LIVING	TCGA-BH-A0HY-01	High	C3-BRCA/Luminal	cluster 3	BRCA CIMP c7	KIRC-like c1	BRCA nonbasal-like c7	miRNA cluster 4	cluster 4	mutation cluster 5	TCGA-BH-A0HY	TCGA Breast Cancer (BRCA)	breast invasive carcinoma	Breast					60	Left
TCGA-BH-A0RX-01	Stage IIA	59	4	Stage IIA	170		Negative	FEMALE	Negative	3	2	2	Negative	M0	Negative	N0	170	0	Basal	Basal-like	Negative	ReacII	-13	-12	followup	T_Other	T2	LIVING	TCGA-BH-A0RX-01	High	C4-BRCA/Basal	cluster 5	Low purity c2	KIRC-like c1	BRCA basal-like c8	miRNA cluster 7	cluster 4	mutation cluster 5	TCGA-BH-A0RX	TCGA Breast Cancer (BRCA)	breast invasive carcinoma	Breast		YES			59	Left Upper Outer Quadrant|Left	Sentinel node biopsy alone
TCGA-BH-A0W3-01	Stage IIA	58	2	No_Conversion	180		Positive	FEMALE	Negative				Negative	M0	Positive	N1	180	0	LumB	Luminal B	Positive		-12	-3	enrollment	T1	T1	LIVING	TCGA-BH-A0W3-01	Squamous	C3-BRCA/Luminal	cluster 2	BRCA CIMP c7		BRCA nonbasal-like c7	miRNA cluster 12	cluster 5	mutation cluster 4	TCGA-BH-A0W3	TCGA Breast Cancer (BRCA)	breast invasive carcinoma	Breast					58	Left Upper Inner Quadrant
TCGA-BH-A0W4-01	Stage IIA	46	2	Stage IIA	175		Positive	FEMALE	Negative	3	3	3	Negative	M0	Negative	N0	175	0	LumA	Luminal A	Positive	LumA	-5	-7	enrollment	T_Other	T2	LIVING	TCGA-BH-A0W4-01	Kirc+	C3-BRCA/Luminal	cluster 2	BRCA non-CIMP c9	BRCA nonbasal-like c8	BRCA nonbasal-like c7	miRNA cluster 4	cluster 4	mutation cluster 4	TCGA-BH-A0W4	TCGA Breast Cancer (BRCA)	breast invasive carcinoma	Breast					46	Left Upper Outer Quadrant
TCGA-BH-A0W5-01	Stage IIA	77	4	No_Conversion	543		Positive	FEMALE	Negative	1	3	3	Negative	M0	Positive	N1	543	0	LumA	Luminal A	Positive	LumA	-5	-4	enrollment	T1	T1	LIVING	TCGA-BH-A0W5-01	Kirc+	C3-BRCA/Luminal	cluster 1	BRCA non-CIMP c9	BRCA nonbasal-like c8	BRCA nonbasal-like c7	miRNA cluster 14	cluster 4	mutation cluster 4	TCGA-BH-A0W5	TCGA Breast Cancer (BRCA)	breast invasive carcinoma	Breast					77	Left	Sentinel lymph node biopsy plus axillary dissection
TCGA-BH-A0W7-01	Stage IA	49	4	Stage I	558		Positive	FEMALE	Negative				Negative	M0	Negative	N0	558	0	LumA	Luminal A	Positive		-4	-4	enrollment	T1	T1	LIVING	TCGA-BH-A0W7-01	BRCA-LUAD+	C3-BRCA/Luminal	cluster 1	BRCA non-CIMP c9		BRCA nonbasal-like c7	miRNA cluster 4	cluster 4	mutation cluster 4	TCGA-BH-A0W7	TCGA Breast Cancer (BRCA)	breast invasive carcinoma	Breast					49	Left Upper Outer Quadrant	Sentinel node biopsy alone
TCGA-BH-A0WA-01	Stage IA	82	1	Stage I	372		Negative	FEMALE	Negative				Negative	M0	Negative	N0	372	0	Basal	Basal-like	Negative		-13	-12	enrollment	T1	T1	LIVING	TCGA-BH-A0WA-01	Squamous	C4-BRCA/Basal	cluster 5	BRCA basal-like c8		BRCA basal-like c8	miRNA cluster 4	cluster 5	mutation cluster 5	TCGA-BH-A0WA	TCGA Breast Cancer (BRCA)	breast invasive carcinoma	Breast					82	Right Upper Outer Quadrant	Axillary lymph node dissection alone
TCGA-BH-A18F-01	Stage IIA	50	2	Stage IIA	268		Positive	FEMALE	Negative	3	4	3	Negative	M0	Negative	N0	268	0	LumA	Luminal B	Positive	ReacI	-4	-7	enrollment	T_Other	T2	LIVING	TCGA-BH-A18F-01	BRCA-LUAD+	C3-BRCA/Luminal	cluster 1	BRCA non-CIMP c9	BRCA nonbasal-like c8	BRCA nonbasal-like c7	miRNA cluster 12	cluster 6	mutation cluster 4	TCGA-BH-A18F	TCGA Breast Cancer (BRCA)	breast invasive carcinoma	Breast					50	Right Lower Outer Quadrant	Sentinel node biopsy alone
TCGA-BH-A18F-11		50			268			FEMALE									268	0							enrollment			LIVING	TCGA-BH-A18F-11		C3-BRCA/Luminal							mutation cluster 4	TCGA-BH-A18F	TCGA Breast Cancer (BRCA)	breast invasive carcinoma	Breast					50	Right Lower Outer Quadrant	Sentinel node biopsy alone
TCGA-BH-A18G-01	Stage X	81	3	No_Conversion	61		Negative	FEMALE	Negative				Negative	M0	Negative	N0	61	0	Basal	Basal-like	Negative	Basal	-13	0	enrollment	T1	T1	LIVING	TCGA-BH-A18G-01	Iq	C4-BRCA/Basal	cluster 4	BRCA basal-like c8	BRCA basal-like c6	BRCA basal-like c8	miRNA cluster 4	cluster 4		TCGA-BH-A18G	TCGA Breast Cancer (BRCA)	breast invasive carcinoma	Breast					81	Right	Sentinel lymph node biopsy plus axillary dissection
TCGA-BH-A18H-01	Stage IB	63	3	Stage I	0		Positive	FEMALE	Negative	3	1	3	Negative	M0	Negative	N0	0	0	LumA	Luminal A	Positive	LumA/B	-2	-5	enrollment	T1	T1	LIVING	TCGA-BH-A18H-01	High	C3-BRCA/Luminal	cluster 1	BRCA non-CIMP c9	BRCA nonbasal-like c8	BRCA nonbasal-like c7	miRNA cluster 13	cluster 6	mutation cluster 3	TCGA-BH-A18H	TCGA Breast Cancer (BRCA)	breast invasive carcinoma	Breast					63	Right Upper Outer Quadrant	Sentinel lymph node biopsy plus axillary dissection
TCGA-BH-A18I-01	Stage IIA	53	4	Stage IIA	220		Positive	FEMALE	Negative				Negative	M0	Positive	N1	220	0	LumA	Luminal A	Positive		-5	-4	enrollment	T1	T1	LIVING	TCGA-BH-A18I-01	Kirc+	C3-BRCA/Luminal	cluster 2	BRCA non-CIMP c9		BRCA nonbasal-like c7	miRNA cluster 4	cluster 4	mutation cluster 4	TCGA-BH-A18I	TCGA Breast Cancer (BRCA)	breast invasive carcinoma	Breast					53	Left Upper Outer Quadrant	Sentinel node biopsy alone
TCGA-BH-A18J-01	Stage IV	56	2	No_Conversion	611	611	Positive	FEMALE	Negative	3	3	4	Positive	M1	Positive	N2	611	1	LumA	Luminal B	Positive	ReacII	-1	-3	enrollment	T_Other	T4	DECEASED	TCGA-BH-A18J-01	Squamous	C3-BRCA/Luminal	cluster 1	Cluster 5	BRCA nonbasal-like c8	BRCA nonbasal-like c7	miRNA cluster 4	cluster 4	mutation cluster 4	TCGA-BH-A18J	TCGA Breast Cancer (BRCA)	breast invasive carcinoma	Breast					56	Right
TCGA-BH-A18J-11		56			611	611		FEMALE									611	1	Normal						enrollment			DECEASED	TCGA-BH-A18J-11		C3-BRCA/Luminal							mutation cluster 4	TCGA-BH-A18J	TCGA Breast Cancer (BRCA)	breast invasive carcinoma	Breast					56	Right
TCGA-BH-A18K-01	Stage I	46	2	Stage I	2547	2762	Positive	FEMALE	Negative				Negative	M0	Negative	N0	2762	1	LumA	Basal-like	Positive		-13	-12	enrollment	T1	T1	DECEASED	TCGA-BH-A18K-01	High	C3-BRCA/Luminal	cluster 2	BRCA non-CIMP c9		BRCA nonbasal-like c7	miRNA cluster 2	cluster 5	mutation cluster 4	TCGA-BH-A18K	TCGA Breast Cancer (BRCA)	breast invasive carcinoma	Breast					46	Left Lower Inner Quadrant	Sentinel lymph node biopsy plus axillary dissection
TCGA-BH-A18K-11		46			2547	2762		FEMALE									2762	1	Normal						enrollment			DECEASED	TCGA-BH-A18K-11		C3-BRCA/Luminal							mutation cluster 4	TCGA-BH-A18K	TCGA Breast Cancer (BRCA)	breast invasive carcinoma	Breast					46	Left Lower Inner Quadrant	Sentinel lymph node biopsy plus axillary dissection
TCGA-BH-A18L-01	Stage IIB	50	5	Stage IIIA	372	811	Positive	FEMALE		1	1	4	Negative	M0	Positive	N1	811	1	LumB	Luminal B	Positive	ReacII	-10	-5	enrollment	T_Other	T3	DECEASED	TCGA-BH-A18L-01	High	C3-BRCA/Luminal	cluster 4	BRCA non-CIMP c9	BRCA nonbasal-like c8	BRCA nonbasal-like c7	miRNA cluster 6	cluster 1	mutation c1uster 9	TCGA-BH-A18L	TCGA Breast Cancer (BRCA)	breast invasive carcinoma	Breast					50	Left Upper Outer Quadrant	Sentinel node biopsy alone
TCGA-BH-A18L-11		50			372	811		FEMALE									811	1	Normal						enrollment			DECEASED	TCGA-BH-A18L-11		C3-BRCA/Luminal							mutation c1uster 9	TCGA-BH-A18L	TCGA Breast Cancer (BRCA)	breast invasive carcinoma	Breast					50	Left Upper Outer Quadrant	Sentinel node biopsy alone
TCGA-BH-A18M-01	Stage IIB	39	2	Stage IIIA	2207	2207	Positive	FEMALE	Positive	3	4	3	Negative	M0	Positive	N1	2207	1	LumA	Luminal A	Positive	ReacI	-5	-7	enrollment	T_Other	T3	DECEASED	TCGA-BH-A18M-01	Iq	C3-BRCA/Luminal	cluster 1	BRCA non-CIMP c9	BRCA nonbasal-like c8	BRCA nonbasal-like c7	miRNA cluster 13	cluster 6	mutation cluster 4	TCGA-BH-A18M	TCGA Breast Cancer (BRCA)	breast invasive carcinoma	Breast					39	Left Upper Inner Quadrant
TCGA-BH-A18M-11		39			2207	2207		FEMALE									2207	1	Normal						enrollment			DECEASED	TCGA-BH-A18M-11		C3-BRCA/Luminal							mutation cluster 4	TCGA-BH-A18M	TCGA Breast Cancer (BRCA)	breast invasive carcinoma	Breast					39	Left Upper Inner Quadrant
TCGA-BH-A18N-01	Stage IIA	88	3	No_Conversion	1148	1148	Positive	FEMALE	Negative	3	3	3	Negative	M0	Positive	N1	1148	1	LumA	Luminal A	Positive	LumA	-12	-3	enrollment	T_Other	T2	DECEASED	TCGA-BH-A18N-01	Kirc+	C3-BRCA/Luminal	cluster 2	BRCA non-CIMP c9	BRCA nonbasal-like c8	BRCA nonbasal-like c7	miRNA cluster 14	cluster 6	mutation c1uster 9	TCGA-BH-A18N	TCGA Breast Cancer (BRCA)	breast invasive carcinoma	Breast					88	Left	Axillary lymph node dissection alone
TCGA-BH-A18N-11		88			1148	1148		FEMALE									1148	1	Normal						enrollment			DECEASED	TCGA-BH-A18N-11		C3-BRCA/Luminal							mutation c1uster 9	TCGA-BH-A18N	TCGA Breast Cancer (BRCA)	breast invasive carcinoma	Breast					88	Left	Axillary lymph node dissection alone
TCGA-BH-A18P-01	Stage I	60	2	Stage I	921	921	Positive	FEMALE	Negative	1	3	1	Negative	M0	Negative	N0	921	1	Her2	HER2-enriched	Negative	X	-1	-1	enrollment	T1	T1	DECEASED	TCGA-BH-A18P-01	Iq	C3-BRCA/Luminal	cluster 4	BRCA CIMP c7	BRCA nonbasal-like c8	BRCA nonbasal-like c7	miRNA cluster 12	cluster 5	mutation cluster 4	TCGA-BH-A18P	TCGA Breast Cancer (BRCA)	breast invasive carcinoma	Breast					60	Left Lower Inner Quadrant	Sentinel node biopsy alone
TCGA-BH-A18P-11		60			921	921		FEMALE									921	1	Normal						enrollment			DECEASED	TCGA-BH-A18P-11		C3-BRCA/Luminal							mutation cluster 4	TCGA-BH-A18P	TCGA Breast Cancer (BRCA)	breast invasive carcinoma	Breast					60	Left Lower Inner Quadrant	Sentinel node biopsy alone
TCGA-BH-A18Q-01	Stage IIB	56	1	No_Conversion	1692	1692	Negative	FEMALE	Negative	2	2	2	Negative	M0	Positive	N1	1692	1	Basal	Basal-like	Negative	Basal	-13	-12	enrollment	T_Other	T2	DECEASED	TCGA-BH-A18Q-01	High	C4-BRCA/Basal	cluster 5	BRCA basal-like c8	BRCA basal-like c6	BRCA basal-like c8	miRNA cluster 7	cluster 5	mutation cluster 13	TCGA-BH-A18Q	TCGA Breast Cancer (BRCA)	breast invasive carcinoma	Breast					56	Left	Axillary lymph node dissection alone
TCGA-BH-A18Q-11		56			1692	1692		FEMALE									1692	1	Normal						enrollment			DECEASED	TCGA-BH-A18Q-11		C4-BRCA/Basal							mutation cluster 13	TCGA-BH-A18Q	TCGA Breast Cancer (BRCA)	breast invasive carcinoma	Breast					56	Left	Axillary lymph node dissection alone
TCGA-BH-A18R-01	Stage IB	50	3	No_Conversion	1099	1141	Indeterminate	FEMALE	Positive	1	1	1	Negative	M0	Positive	N1	1141	1	Her2	HER2-enriched	Negative	Her2	-2	0	enrollment	T_Other	T2	DECEASED	TCGA-BH-A18R-01	High	C3-BRCA/Luminal	cluster 4	BRCA CIMP c7	BRCA basal-like c6	BRCA nonbasal-like c7	miRNA cluster 4	cluster 4	mutation c1uster 9	TCGA-BH-A18R	TCGA Breast Cancer (BRCA)	breast invasive carcinoma	Breast					50	Right Upper Outer Quadrant
TCGA-BH-A18R-11		50			1099	1141		FEMALE									1141	1	Normal						enrollment			DECEASED	TCGA-BH-A18R-11		C3-BRCA/Luminal							mutation c1uster 9	TCGA-BH-A18R	TCGA Breast Cancer (BRCA)	breast invasive carcinoma	Breast					50	Right Upper Outer Quadrant
TCGA-BH-A18S-01	Stage I	79	5	Stage I	2009	2009	Positive	FEMALE		3	3	3	Negative	M0	Negative	N0	2009	1	LumA	Luminal A	Positive	LumA/B	-12	-3	enrollment	T1	T1	DECEASED	TCGA-BH-A18S-01	Iq	C3-BRCA/Luminal	cluster 2	BRCA non-CIMP c9	BRCA nonbasal-like c8	BRCA nonbasal-like c7	miRNA c1uster 10	cluster 7	mutation cluster 12	TCGA-BH-A18S	TCGA Breast Cancer (BRCA)	breast invasive carcinoma	Breast					79	Right Lower Inner Quadrant	Sentinel node biopsy alone
TCGA-BH-A18S-11		79			2009	2009		FEMALE									2009	1	Normal						enrollment			DECEASED	TCGA-BH-A18S-11		C3-BRCA/Luminal							mutation cluster 12	TCGA-BH-A18S	TCGA Breast Cancer (BRCA)	breast invasive carcinoma	Breast					79	Right Lower Inner Quadrant	Sentinel node biopsy alone
TCGA-BH-A18T-01	Stage IIA	70	1	Stage IIA	224	224	Negative	FEMALE	Negative	2	2	2	Negative	M0	Negative	N0	224	1	Basal	Luminal A	Negative	ReacII	0	-3	enrollment	T_Other	T2	DECEASED	TCGA-BH-A18T-01	High	C4-BRCA/Basal	cluster 5	BRCA basal-like c8	BRCA basal-like c6	BRCA basal-like c8	miRNA cluster 14	cluster 2	mutation cluster 5	TCGA-BH-A18T	TCGA Breast Cancer (BRCA)	breast invasive carcinoma	Breast					70	Right Upper Outer Quadrant	Sentinel node biopsy alone
TCGA-BH-A18U-01	Stage IIIA	72	3	Stage IIIA	1317	1563	Positive	FEMALE	Positive	4	5	4	Negative	M0	Positive	N2	1563	1	LumB	Luminal B	Positive	ReacI	-2	-5	enrollment	T_Other	T2	DECEASED	TCGA-BH-A18U-01	High	C3-BRCA/Luminal	cluster 3	BRCA CIMP c7	KIRC-like c1	BRCA nonbasal-like c7	miRNA cluster 12	cluster 5	mutation cluster 13	TCGA-BH-A18U	TCGA Breast Cancer (BRCA)	breast invasive carcinoma	Breast					72	Left	Sentinel lymph node biopsy plus axillary dissection
TCGA-BH-A18U-11		72			1317	1563		FEMALE									1563	1	Normal						enrollment			DECEASED	TCGA-BH-A18U-11		C3-BRCA/Luminal							mutation cluster 13	TCGA-BH-A18U	TCGA Breast Cancer (BRCA)	breast invasive carcinoma	Breast					72	Left	Sentinel lymph node biopsy plus axillary dissection
TCGA-BH-A18V-01	Stage IIB	48	1	No_Conversion	1555	1555	Negative	FEMALE	Negative	2	2	2	Negative	M0	Positive	N1	1555	1	Basal	Basal-like	Negative	Basal	-13	-12	enrollment	T_Other	T2	DECEASED	TCGA-BH-A18V-01	High	C4-BRCA/Basal	cluster 5	BRCA basal-like c8	BRCA basal-like c6	BRCA basal-like c8	miRNA cluster 11	cluster 5	mutation cluster 2	TCGA-BH-A18V	TCGA Breast Cancer (BRCA)	breast invasive carcinoma	Breast					48	Right	Axillary lymph node dissection alone
TCGA-BH-A18V-06		48			1555	1555		FEMALE									1555	1	Basal						enrollment			DECEASED	TCGA-BH-A18V-06		C4-BRCA/Basal		BRCA basal-like c8		BRCA basal-like c8	miRNA cluster 11		mutation cluster 2	TCGA-BH-A18V	TCGA Breast Cancer (BRCA)	breast invasive carcinoma	Breast					48	Right	Axillary lymph node dissection alone
TCGA-BH-A18V-11		48			1555	1555		FEMALE									1555	1	Normal						enrollment			DECEASED	TCGA-BH-A18V-11		C4-BRCA/Basal							mutation cluster 2	TCGA-BH-A18V	TCGA Breast Cancer (BRCA)	breast invasive carcinoma	Breast					48	Right	Axillary lymph node dissection alone
TCGA-BH-A1EN-01	Stage IIA	78	3	Stage IIA		2052	Negative	FEMALE	Positive				Negative	M0	Negative	N0	2052	1	Her2		Negative				enrollment	T_Other	T2	DECEASED	TCGA-BH-A1EN-01	High	C3-BRCA/Luminal	cluster 3	BRCA CIMP c7	BRCA basal-like c6	BRCA nonbasal-like c7	miRNA cluster 7	cluster 3	mutation c1uster 9	TCGA-BH-A1EN	TCGA Breast Cancer (BRCA)	breast invasive carcinoma	Breast					78	Right
TCGA-BH-A1EN-11		78				2052		FEMALE									2052	1	Normal						enrollment			DECEASED	TCGA-BH-A1EN-11		C3-BRCA/Luminal							mutation c1uster 9	TCGA-BH-A1EN	TCGA Breast Cancer (BRCA)	breast invasive carcinoma	Breast					78	Right
TCGA-BH-A1EO-01	Stage IIA	68	3	Stage IIA		2798	Positive	FEMALE	Negative				Negative	M0	Positive	N1	2798	1	LumA	Luminal A	Positive		-5	-3	enrollment	T1	T1	DECEASED	TCGA-BH-A1EO-01	High	C3-BRCA/Luminal	cluster 4	BRCA CIMP c7	BRCA nonbasal-like c8	BRCA nonbasal-like c7	miRNA cluster 14	cluster 6	mutation c1uster 9	TCGA-BH-A1EO	TCGA Breast Cancer (BRCA)	breast invasive carcinoma	Breast					68	Right
TCGA-BH-A1EO-11		68				2798		FEMALE									2798	1	LumA						enrollment			DECEASED	TCGA-BH-A1EO-11		C3-BRCA/Luminal							mutation c1uster 9	TCGA-BH-A1EO	TCGA Breast Cancer (BRCA)	breast invasive carcinoma	Breast					68	Right
TCGA-BH-A1ES-01	Stage IIB	35	5	Stage IIB		3462	Positive	FEMALE	Negative				Negative	M0	Positive	N1	3462	1	LumA	Luminal A	Positive		-9	-3	enrollment	T_Other	T2	DECEASED	TCGA-BH-A1ES-01	Squamous	C3-BRCA/Luminal	cluster 4	BRCA CIMP c7	BRCA nonbasal-like c8	BRCA nonbasal-like c7	miRNA cluster 12	cluster 5	mutation c1uster 9	TCGA-BH-A1ES	TCGA Breast Cancer (BRCA)	breast invasive carcinoma	Breast					35	Right Upper Inner Quadrant
TCGA-BH-A1ES-06		35				3462		FEMALE									3462	1							enrollment			DECEASED	TCGA-BH-A1ES-06		C3-BRCA/Luminal							mutation c1uster 9	TCGA-BH-A1ES	TCGA Breast Cancer (BRCA)	breast invasive carcinoma	Breast					35	Right Upper Inner Quadrant
TCGA-BH-A1ES-11		35				3462		FEMALE									3462	1							enrollment			DECEASED	TCGA-BH-A1ES-11		C3-BRCA/Luminal							mutation c1uster 9	TCGA-BH-A1ES	TCGA Breast Cancer (BRCA)	breast invasive carcinoma	Breast					35	Right Upper Inner Quadrant
TCGA-BH-A1ET-01	Stage IIA	55	2	Stage I		2520	Positive	FEMALE	Negative				Negative	M0	Negative	N0	2520	1	LumA	Luminal A	Positive		-12	-7	enrollment	T1	T1	DECEASED	TCGA-BH-A1ET-01	Kirc+	C3-BRCA/Luminal	cluster 2	BRCA non-CIMP c9	BRCA nonbasal-like c8	BRCA nonbasal-like c7	miRNA cluster 13	cluster 6	mutation cluster 4	TCGA-BH-A1ET	TCGA Breast Cancer (BRCA)	breast invasive carcinoma	Breast					55	Left
TCGA-BH-A1ET-11		55				2520		FEMALE									2520	1	Normal						enrollment			DECEASED	TCGA-BH-A1ET-11		C3-BRCA/Luminal							mutation cluster 4	TCGA-BH-A1ET	TCGA Breast Cancer (BRCA)	breast invasive carcinoma	Breast					55	Left
TCGA-BH-A1EU-01	Stage I	83	1	Stage I		1286	Positive	FEMALE	Negative				Negative	M0	Negative	N0	1286	1	LumA	Luminal A	Positive		-5	-7	enrollment	T1	T1	DECEASED	TCGA-BH-A1EU-01	Squamous	C3-BRCA/Luminal	cluster 1	BRCA non-CIMP c9	BRCA nonbasal-like c8	BRCA nonbasal-like c7	miRNA cluster 14	cluster 6	mutation cluster 4	TCGA-BH-A1EU	TCGA Breast Cancer (BRCA)	breast invasive carcinoma	Breast					83	Right
TCGA-BH-A1EU-11		83				1286		FEMALE									1286	1	Normal						enrollment			DECEASED	TCGA-BH-A1EU-11		C3-BRCA/Luminal							mutation cluster 4	TCGA-BH-A1EU	TCGA Breast Cancer (BRCA)	breast invasive carcinoma	Breast					83	Right
TCGA-BH-A1EV-01		45	2			365	Positive	FEMALE									365	1	Her2	HER2-enriched	Positive		-1	-5	enrollment			DECEASED	TCGA-BH-A1EV-01	High	C3-BRCA/Luminal	cluster 2	BRCA non-CIMP c9	BRCA basal-like c6	BRCA nonbasal-like c7	miRNA cluster 7	cluster 7	mutation cluster 5	TCGA-BH-A1EV	TCGA Breast Cancer (BRCA)	breast invasive carcinoma	Breast					45	Left
TCGA-BH-A1EV-11		45				365		FEMALE									365	1	Normal						enrollment			DECEASED	TCGA-BH-A1EV-11		C3-BRCA/Luminal							mutation cluster 5	TCGA-BH-A1EV	TCGA Breast Cancer (BRCA)	breast invasive carcinoma	Breast					45	Left
TCGA-BH-A1EW-01	Stage IIA	38	3	No_Conversion		1694	Negative	FEMALE	Negative				Negative	M0	Positive	N1	1694	1	LumA	Luminal B	Negative		-3	-3	enrollment	T_Other	T2	DECEASED	TCGA-BH-A1EW-01	High	C3-BRCA/Luminal	cluster 1	BRCA non-CIMP c9	BRCA nonbasal-like c8	BRCA nonbasal-like c7	miRNA cluster 4	cluster 6	mutation c1uster 9	TCGA-BH-A1EW	TCGA Breast Cancer (BRCA)	breast invasive carcinoma	Breast					38	Left Upper Outer Quadrant
TCGA-BH-A1EW-11		38				1694		FEMALE									1694	1	LumA						enrollment			DECEASED	TCGA-BH-A1EW-11		C3-BRCA/Luminal							mutation c1uster 9	TCGA-BH-A1EW	TCGA Breast Cancer (BRCA)	breast invasive carcinoma	Breast					38	Left Upper Outer Quadrant
TCGA-BH-A1EX-01	Stage IIB	67	3	Stage IIB		1508	Positive	FEMALE	Negative				Negative	M0	Positive	N1	1508	1	LumA		Positive				enrollment	T_Other	T2	DECEASED	TCGA-BH-A1EX-01	High	C3-BRCA/Luminal	cluster 4	BRCA non-CIMP c9	BRCA nonbasal-like c8	BRCA nonbasal-like c7	miRNA cluster 12	cluster 5	mutation c1uster 9	TCGA-BH-A1EX	TCGA Breast Cancer (BRCA)	breast invasive carcinoma	Breast					67	Right Lower Inner Quadrant
TCGA-BH-A1EY-01	Stage IIA	79	2	Stage IIA		538	Positive	FEMALE	Negative				Negative	M0	Negative	N0	538	1	LumA		Positive				enrollment	T_Other	T2	DECEASED	TCGA-BH-A1EY-01	Squamous	C3-BRCA/Luminal	cluster 4	BRCA CIMP c7	BRCA nonbasal-like c8	BRCA nonbasal-like c7	miRNA cluster 6	cluster 1	mutation cluster 3	TCGA-BH-A1EY	TCGA Breast Cancer (BRCA)	breast invasive carcinoma	Breast					79	Left Upper Outer Quadrant
TCGA-BH-A1EY-11		79				538		FEMALE									538	1							enrollment			DECEASED	TCGA-BH-A1EY-11		C3-BRCA/Luminal							mutation cluster 3	TCGA-BH-A1EY	TCGA Breast Cancer (BRCA)	breast invasive carcinoma	Breast					79	Left Upper Outer Quadrant
TCGA-BH-A1F0-01	Stage IIA	80	1	Stage IIA		785	Negative	FEMALE	Negative				Negative	M0	Positive	N1	785	1	Basal	Basal-like	Indeterminate		-13	-12	enrollment	T1	T1	DECEASED	TCGA-BH-A1F0-01	High	C4-BRCA/Basal	cluster 5	Low purity c2	BRCA basal-like c6	BRCA basal-like c8	miRNA c1uster 9	cluster 6	mutation cluster 5	TCGA-BH-A1F0	TCGA Breast Cancer (BRCA)	breast invasive carcinoma	Breast					80	Left
TCGA-BH-A1F0-11		80				785		FEMALE									785	1	Normal						enrollment			DECEASED	TCGA-BH-A1F0-11		C4-BRCA/Basal							mutation cluster 5	TCGA-BH-A1F0	TCGA Breast Cancer (BRCA)	breast invasive carcinoma	Breast					80	Left
TCGA-BH-A1F2-01	Stage IIIB	53	5	Stage		959	Positive	FEMALE	Positive				Negative	M0	Positive	N1	959	1	LumB		Positive				enrollment	T_Other	T4	DECEASED	TCGA-BH-A1F2-01	High	C3-BRCA/Luminal	cluster 2	BRCA CIMP c7	BRCA basal-like c6	BRCA nonbasal-like c7	miRNA c1uster 9	cluster 6	mutation cluster 14	TCGA-BH-A1F2	TCGA Breast Cancer (BRCA)	breast invasive carcinoma	Breast					53	Left
TCGA-BH-A1F2-11		53				959		FEMALE									959	1	Normal						enrollment			DECEASED	TCGA-BH-A1F2-11		C3-BRCA/Luminal							mutation cluster 14	TCGA-BH-A1F2	TCGA Breast Cancer (BRCA)	breast invasive carcinoma	Breast					53	Left
TCGA-BH-A1F5-01		62				2712	Positive	FEMALE									2712	1	LumA		Positive				enrollment			DECEASED	TCGA-BH-A1F5-01	Kirc+	C3-BRCA/Luminal		BRCA non-CIMP c9	BRCA nonbasal-like c8	BRCA nonbasal-like c7	miRNA cluster 14		mutation c1uster 9	TCGA-BH-A1F5	TCGA Breast Cancer (BRCA)	breast invasive carcinoma	Breast					62	Right
TCGA-BH-A1F5-11		62				2712		FEMALE									2712	1							enrollment			DECEASED	TCGA-BH-A1F5-11		C3-BRCA/Luminal							mutation c1uster 9	TCGA-BH-A1F5	TCGA Breast Cancer (BRCA)	breast invasive carcinoma	Breast					62	Right
TCGA-BH-A1F6-01		51				2965	Negative	FEMALE									2965	1	Basal		Negative				enrollment			DECEASED	TCGA-BH-A1F6-01	High	C4-BRCA/Basal		BRCA basal-like c8	BRCA basal-like c6	BRCA basal-like c8	miRNA cluster 12		mutation cluster 5	TCGA-BH-A1F6	TCGA Breast Cancer (BRCA)	breast invasive carcinoma	Breast					51	Left
TCGA-BH-A1F6-11		51				2965		FEMALE									2965	1	Normal						enrollment			DECEASED	TCGA-BH-A1F6-11		C4-BRCA/Basal							mutation cluster 5	TCGA-BH-A1F6	TCGA Breast Cancer (BRCA)	breast invasive carcinoma	Breast					51	Left
TCGA-BH-A1F8-01	Stage IIIB	90	1	Stage IIIC		749	Positive	FEMALE	Negative				Negative	M0	Positive	N2	749	1	LumB		Positive				enrollment	T_Other	T4	DECEASED	TCGA-BH-A1F8-01	High	C3-BRCA/Luminal	cluster 4	BRCA CIMP c7	BRCA nonbasal-like c8	BRCA nonbasal-like c7	miRNA c1uster 9	cluster 4	mutation cluster 4	TCGA-BH-A1F8	TCGA Breast Cancer (BRCA)	breast invasive carcinoma	Breast					90	Left
TCGA-BH-A1F8-11		90				749		FEMALE									749	1	Normal						enrollment			DECEASED	TCGA-BH-A1F8-11		C3-BRCA/Luminal							mutation cluster 4	TCGA-BH-A1F8	TCGA Breast Cancer (BRCA)	breast invasive carcinoma	Breast					90	Left
TCGA-BH-A1FB-01	Stage IIB	60	4	Stage IIB		3669	Positive	FEMALE	Negative				Negative	M0	Positive	N1	3669	1	LumA		Positive				enrollment	T_Other	T2	DECEASED	TCGA-BH-A1FB-01	Kirc+	C3-BRCA/Luminal	cluster 1	BRCA non-CIMP c9	BRCA nonbasal-like c8	BRCA nonbasal-like c7	miRNA cluster 4	cluster 6		TCGA-BH-A1FB	TCGA Breast Cancer (BRCA)	breast invasive carcinoma	Breast					60	Right
TCGA-BH-A1FB-11		60				3669		FEMALE									3669	1	Normal						enrollment			DECEASED	TCGA-BH-A1FB-11		C3-BRCA/Luminal								TCGA-BH-A1FB	TCGA Breast Cancer (BRCA)	breast invasive carcinoma	Breast					60	Right
TCGA-BH-A1FC-01	Stage IIA	78	4	Stage IIA		3471	Negative	FEMALE	Negative				Negative	M0	Positive	N1	3471	1	Basal		Negative				enrollment	T1	T1	DECEASED	TCGA-BH-A1FC-01	High	C4-BRCA/Basal	cluster 4	BRCA basal-like c8	BRCA basal-like c6	BRCA basal-like c8	miRNA cluster 7	cluster 3	mutation cluster 5	TCGA-BH-A1FC	TCGA Breast Cancer (BRCA)	breast invasive carcinoma	Breast					78	Right Upper Outer Quadrant
TCGA-BH-A1FC-11		78				3471		FEMALE									3471	1	Normal						enrollment			DECEASED	TCGA-BH-A1FC-11		C4-BRCA/Basal							mutation cluster 5	TCGA-BH-A1FC	TCGA Breast Cancer (BRCA)	breast invasive carcinoma	Breast					78	Right Upper Outer Quadrant
TCGA-BH-A1FD-01	Stage I	68	4	Stage I		1008	Positive	FEMALE	Negative				Negative	M0	Negative	N0	1008	1	LumB		Positive				enrollment	T1	T1	DECEASED	TCGA-BH-A1FD-01	Squamous	C3-BRCA/Luminal	cluster 3	BRCA CIMP c7	BRCA nonbasal-like c8	BRCA nonbasal-like c7			mutation cluster 3	TCGA-BH-A1FD	TCGA Breast Cancer (BRCA)	breast invasive carcinoma	Breast					68	Left
TCGA-BH-A1FD-11		68				1008		FEMALE									1008	1	Normal						enrollment			DECEASED	TCGA-BH-A1FD-11		C3-BRCA/Luminal							mutation cluster 3	TCGA-BH-A1FD	TCGA Breast Cancer (BRCA)	breast invasive carcinoma	Breast					68	Left
TCGA-BH-A1FE-01	Stage IIB	31	2	Stage IIB		2273	Positive	FEMALE	Negative				Negative	M0	Positive	N1	2273	1	LumA		Positive				enrollment	T_Other	T2	DECEASED	TCGA-BH-A1FE-01	Kirc+	C3-BRCA/Luminal	cluster 4	BRCA non-CIMP c9	KIRC-like c1	BRCA nonbasal-like c7	miRNA cluster 4	cluster 6	mutation cluster 3	TCGA-BH-A1FE	TCGA Breast Cancer (BRCA)	breast invasive carcinoma	Breast					31	Left
TCGA-BH-A1FE-06		31				2273		FEMALE									2273	1	Normal						enrollment			DECEASED	TCGA-BH-A1FE-06		C3-BRCA/Luminal		Low purity c2		GBM-like c6	miRNA cluster 5		mutation cluster 3	TCGA-BH-A1FE	TCGA Breast Cancer (BRCA)	breast invasive carcinoma	Breast					31	Left
TCGA-BH-A1FE-11		31				2273		FEMALE									2273	1	Normal						enrollment			DECEASED	TCGA-BH-A1FE-11		C3-BRCA/Luminal							mutation cluster 3	TCGA-BH-A1FE	TCGA Breast Cancer (BRCA)	breast invasive carcinoma	Breast					31	Left
TCGA-BH-A1FG-01	Stage I	88	4	Stage I		3738	Positive	FEMALE					Negative	M0	Negative	N0	3738	1	LumA		Positive				enrollment	T1	T1	DECEASED	TCGA-BH-A1FG-01	Squamous	C3-BRCA/Luminal	cluster 2	BRCA non-CIMP c9	BRCA nonbasal-like c8	BRCA nonbasal-like c7	miRNA cluster 14	cluster 2	mutation c1uster 9	TCGA-BH-A1FG	TCGA Breast Cancer (BRCA)	breast invasive carcinoma	Breast					88	Left
TCGA-BH-A1FG-11		88				3738		FEMALE									3738	1	Normal						enrollment			DECEASED	TCGA-BH-A1FG-11		C3-BRCA/Luminal							mutation c1uster 9	TCGA-BH-A1FG	TCGA Breast Cancer (BRCA)	breast invasive carcinoma	Breast					88	Left
TCGA-BH-A1FH-01	Stage IV	47	4	No_Conversion		1123	Positive	FEMALE	Negative				Positive	M1	Positive	N1	1123	1	LumA		Negative				enrollment	T_Other	T2	DECEASED	TCGA-BH-A1FH-01	Kirc+	C3-BRCA/Luminal	cluster 1	Low purity c2	BRCA nonbasal-like c8	BRCA nonbasal-like c7	miRNA cluster 14	cluster 6	mutation c1uster 9	TCGA-BH-A1FH	TCGA Breast Cancer (BRCA)	breast invasive carcinoma	Breast					47	Left Upper Outer Quadrant
TCGA-BH-A1FH-11		47				1123		FEMALE									1123	1	Normal						enrollment			DECEASED	TCGA-BH-A1FH-11		C3-BRCA/Luminal							mutation c1uster 9	TCGA-BH-A1FH	TCGA Breast Cancer (BRCA)	breast invasive carcinoma	Breast					47	Left Upper Outer Quadrant
TCGA-BH-A1FJ-01	Stage IIIA	66	3	Stage IIIA		1927	Negative	FEMALE	Negative				Negative	M0	Positive	N1	1927	1	LumB		Positive				enrollment	T_Other	T3	DECEASED	TCGA-BH-A1FJ-01	Iq	C3-BRCA/Luminal	cluster 4	BRCA CIMP c7	BRCA nonbasal-like c8	BRCA nonbasal-like c7	miRNA cluster 4	cluster 2	mutation c1uster 9	TCGA-BH-A1FJ	TCGA Breast Cancer (BRCA)	breast invasive carcinoma	Breast					66	Right Upper Outer Quadrant
TCGA-BH-A1FJ-11		66				1927		FEMALE									1927	1	Normal						enrollment			DECEASED	TCGA-BH-A1FJ-11		C3-BRCA/Luminal							mutation c1uster 9	TCGA-BH-A1FJ	TCGA Breast Cancer (BRCA)	breast invasive carcinoma	Breast					66	Right Upper Outer Quadrant
TCGA-BH-A1FL-01	Stage IIB	69	2	Stage IIIA		1673	Positive	FEMALE	Negative				Negative	M0	Positive	N1	1673	1	LumA		Positive				enrollment	T_Other	T2	DECEASED	TCGA-BH-A1FL-01	Iq	C3-BRCA/Luminal	cluster 4	BRCA CIMP c7	BRCA nonbasal-like c8	BRCA nonbasal-like c7	miRNA cluster 12	cluster 6	mutation c1uster 9	TCGA-BH-A1FL	TCGA Breast Cancer (BRCA)	breast invasive carcinoma	Breast					69	Left Upper Outer Quadrant
TCGA-BH-A1FM-01	Stage IIIA	44	1	Stage IIIA		1388	Positive	FEMALE	Negative				Negative	M0	Positive	N2	1388	1	LumB		Negative				enrollment	T_Other	T2	DECEASED	TCGA-BH-A1FM-01	High	C3-BRCA/Luminal	cluster 3	BRCA CIMP c7	BRCA nonbasal-like c8	BRCA nonbasal-like c7	miRNA cluster 4	cluster 4	mutation c1uster 9	TCGA-BH-A1FM	TCGA Breast Cancer (BRCA)	breast invasive carcinoma	Breast					44	Right Upper Outer Quadrant
TCGA-BH-A1FM-11		44				1388		FEMALE									1388	1	Normal						enrollment			DECEASED	TCGA-BH-A1FM-11		C3-BRCA/Luminal							mutation c1uster 9	TCGA-BH-A1FM	TCGA Breast Cancer (BRCA)	breast invasive carcinoma	Breast					44	Right Upper Outer Quadrant
TCGA-BH-A1FN-01	Stage IIA	34	1	Stage IIA		2192	Positive	FEMALE	Negative				Negative	M0	Negative	N0	2192	1	LumB		Positive				enrollment	T_Other	T2	DECEASED	TCGA-BH-A1FN-01	High	C3-BRCA/Luminal	cluster 5	Cluster 5	BRCA nonbasal-like c8	BRCA nonbasal-like c7	miRNA cluster 4	cluster 4	mutation cluster 5	TCGA-BH-A1FN	TCGA Breast Cancer (BRCA)	breast invasive carcinoma	Breast					34	Right Upper Outer Quadrant
TCGA-BH-A1FN-11		34				2192		FEMALE									2192	1	Normal						enrollment			DECEASED	TCGA-BH-A1FN-11		C3-BRCA/Luminal							mutation cluster 5	TCGA-BH-A1FN	TCGA Breast Cancer (BRCA)	breast invasive carcinoma	Breast					34	Right Upper Outer Quadrant
TCGA-BH-A1FR-01	Stage IIIB	73	1	No_Conversion		4398	Positive	FEMALE	Negative				Negative	M0	Positive	N1	4398	1	LumA		Positive				enrollment	T_Other	T4	DECEASED	TCGA-BH-A1FR-01	Quiet	C3-BRCA/Luminal	cluster 2	KIRC-like c17	BRCA nonbasal-like c8	BRCA nonbasal-like c7	miRNA cluster 6	cluster 1	mutation c1uster 9	TCGA-BH-A1FR	TCGA Breast Cancer (BRCA)	breast invasive carcinoma	Breast					73	Right Upper Inner Quadrant
TCGA-BH-A1FR-11		73				4398		FEMALE									4398	1	Normal						enrollment			DECEASED	TCGA-BH-A1FR-11		C3-BRCA/Luminal							mutation c1uster 9	TCGA-BH-A1FR	TCGA Breast Cancer (BRCA)	breast invasive carcinoma	Breast					73	Right Upper Inner Quadrant
TCGA-BH-A1FU-01	Stage IA	44	4	Stage I		2192	Negative	FEMALE	Positive				Negative	M0	Negative	N0	2192	1	Normal		Negative				enrollment	T1	T1	DECEASED	TCGA-BH-A1FU-01	Kirc+	C3-BRCA/Luminal	cluster 1	Cluster 5		BRCA nonbasal-like c7	miRNA cluster 4	cluster 6	mutation cluster 5	TCGA-BH-A1FU	TCGA Breast Cancer (BRCA)	breast invasive carcinoma	Breast					44	Right Upper Outer Quadrant
TCGA-BH-A1FU-11		44				2192		FEMALE									2192	1	Normal						enrollment			DECEASED	TCGA-BH-A1FU-11		C3-BRCA/Luminal							mutation cluster 5	TCGA-BH-A1FU	TCGA Breast Cancer (BRCA)	breast invasive carcinoma	Breast					44	Right Upper Outer Quadrant
TCGA-BH-A201-01		64	5		209		Positive	FEMALE									209	0	LumA		Positive				enrollment			LIVING	TCGA-BH-A201-01	Kirc+	C3-BRCA/Luminal	cluster 4	BRCA non-CIMP c9	BRCA nonbasal-like c8	BRCA nonbasal-like c7	miRNA c1uster 9	cluster 6	mutation c1uster 9	TCGA-BH-A201	TCGA Breast Cancer (BRCA)	breast invasive carcinoma	Breast					64	Left
TCGA-BH-A202-01		60	2		22		Positive	FEMALE									22	0	LumB		Positive				enrollment			LIVING	TCGA-BH-A202-01	High	C3-BRCA/Luminal	cluster 4	BRCA CIMP c7	BRCA basal-like c6	BRCA nonbasal-like c7	miRNA cluster 4	cluster 6	mutation cluster 3	TCGA-BH-A202	TCGA Breast Cancer (BRCA)	breast invasive carcinoma	Breast					60	Left
TCGA-BH-A203-01		78	3			1174		FEMALE									1174	1	Her2						enrollment			DECEASED	TCGA-BH-A203-01	High	C3-BRCA/Luminal	cluster 3	BRCA CIMP c7	BRCA basal-like c6	BRCA nonbasal-like c7	miRNA cluster 4		mutation cluster 4	TCGA-BH-A203	TCGA Breast Cancer (BRCA)	breast invasive carcinoma	Breast					78	Right
TCGA-BH-A203-11		78				1174		FEMALE									1174	1	Normal						enrollment			DECEASED	TCGA-BH-A203-11		C3-BRCA/Luminal							mutation cluster 4	TCGA-BH-A203	TCGA Breast Cancer (BRCA)	breast invasive carcinoma	Breast					78	Right
TCGA-BH-A204-01		80	4			2534		FEMALE									2534	1	LumB						enrollment			DECEASED	TCGA-BH-A204-01	Squamous	C3-BRCA/Luminal	cluster 3	BRCA CIMP c7	BRCA nonbasal-like c8	BRCA nonbasal-like c7	miRNA cluster 6		mutation cluster 14	TCGA-BH-A204	TCGA Breast Cancer (BRCA)	breast invasive carcinoma	Breast					80	Left
TCGA-BH-A204-11		80				2534		FEMALE									2534	1	Normal						enrollment			DECEASED	TCGA-BH-A204-11		C3-BRCA/Luminal							mutation cluster 14	TCGA-BH-A204	TCGA Breast Cancer (BRCA)	breast invasive carcinoma	Breast					80	Left
TCGA-BH-A208-01		48	3			1759		FEMALE									1759	1	Normal						enrollment			DECEASED	TCGA-BH-A208-01	High	C3-BRCA/Luminal	cluster 5	OV-like c1	BRCA basal-like c6	BRCA nonbasal-like c7	miRNA cluster 11		mutation cluster 8	TCGA-BH-A208	TCGA Breast Cancer (BRCA)	breast invasive carcinoma	Breast					48	Left
TCGA-BH-A208-11		48				1759		FEMALE									1759	1	Normal						enrollment			DECEASED	TCGA-BH-A208-11		C3-BRCA/Luminal							mutation cluster 8	TCGA-BH-A208	TCGA Breast Cancer (BRCA)	breast invasive carcinoma	Breast					48	Left
TCGA-BH-A209-01		77	4			3959	Positive	FEMALE									3959	1	LumB		Positive				enrollment			DECEASED	TCGA-BH-A209-01	High	C3-BRCA/Luminal	cluster 3	BRCA non-CIMP c9	BRCA nonbasal-like c8	BRCA nonbasal-like c7	miRNA cluster 7		mutation cluster 14	TCGA-BH-A209	TCGA Breast Cancer (BRCA)	breast invasive carcinoma	Breast					77	Left Upper Outer Quadrant
TCGA-BH-A209-11		77				3959		FEMALE									3959	1	Normal						enrollment			DECEASED	TCGA-BH-A209-11		C3-BRCA/Luminal							mutation cluster 14	TCGA-BH-A209	TCGA Breast Cancer (BRCA)	breast invasive carcinoma	Breast					77	Left Upper Outer Quadrant
TCGA-BH-A28O-01																													TCGA-BH-A28O-01	Quiet			Low purity c2			miRNA cluster 4			TCGA-BH-A28O	TCGA Breast Cancer (BRCA)	breast invasive carcinoma	Breast					50	Right Lower Outer Quadrant	Sentinel node biopsy alone
TCGA-BH-A28Q-01		46	2		196		Positive	FEMALE									196	0	LumA		Positive				enrollment			LIVING	TCGA-BH-A28Q-01	Iq	C3-BRCA/Luminal	cluster 4	BRCA CIMP c7	BRCA nonbasal-like c8	BRCA nonbasal-like c7	miRNA cluster 3		mutation c1uster 9	TCGA-BH-A28Q	TCGA Breast Cancer (BRCA)	breast invasive carcinoma	Breast					46	Right
TCGA-BH-A2L8-01																			LumA										TCGA-BH-A2L8-01	Kirc+	C3-BRCA/Luminal		BRCA non-CIMP c9	BRCA nonbasal-like c8	BRCA nonbasal-like c7	miRNA cluster 4			TCGA-BH-A2L8	TCGA Breast Cancer (BRCA)	breast invasive carcinoma	Breast					45	Right Upper Outer Quadrant	Sentinel node biopsy alone
TCGA-BH-A42T-01																													TCGA-BH-A42T-01										TCGA-BH-A42T	TCGA Breast Cancer (BRCA)	breast invasive carcinoma	Breast					75	Left	Sentinel node biopsy alone
TCGA-BH-A42U-01																													TCGA-BH-A42U-01										TCGA-BH-A42U	TCGA Breast Cancer (BRCA)	breast invasive carcinoma	Breast					80	Right
TCGA-BH-A42V-01																													TCGA-BH-A42V-01										TCGA-BH-A42V	TCGA Breast Cancer (BRCA)	breast invasive carcinoma	Breast					41	Left Lower Outer Quadrant	Sentinel node biopsy alone
TCGA-BH-A5IZ-01																													TCGA-BH-A5IZ-01										TCGA-BH-A5IZ	TCGA Breast Cancer (BRCA)	breast invasive carcinoma	Breast					51	Left
TCGA-BH-A5J0-01																													TCGA-BH-A5J0-01										TCGA-BH-A5J0	TCGA Breast Cancer (BRCA)	breast invasive carcinoma	Breast					63	Left
TCGA-BH-A6R8-01																													TCGA-BH-A6R8-01										TCGA-BH-A6R8	TCGA Breast Cancer (BRCA)	breast invasive carcinoma	Breast					46	Left
TCGA-BH-A6R9-01																													TCGA-BH-A6R9-01										TCGA-BH-A6R9	TCGA Breast Cancer (BRCA)	breast invasive carcinoma	Breast					61	Left
TCGA-BH-A8FY-01																													TCGA-BH-A8FY-01										TCGA-BH-A8FY	TCGA Breast Cancer (BRCA)	breast invasive carcinoma	Breast					87	Left|Left Upper Outer Quadrant|Left Lower Outer Quadrant
TCGA-BH-A8FZ-01																													TCGA-BH-A8FZ-01										TCGA-BH-A8FZ	TCGA Breast Cancer (BRCA)	breast invasive carcinoma	Breast					58	Left
TCGA-BH-A8G0-01																													TCGA-BH-A8G0-01										TCGA-BH-A8G0	TCGA Breast Cancer (BRCA)	breast invasive carcinoma	Breast					54	Left
TCGA-BH-AB28-01																													TCGA-BH-AB28-01										TCGA-BH-AB28	TCGA Breast Cancer (BRCA)	breast invasive carcinoma	Breast					53	Left
TCGA-C8-A12K-01	Stage IIB	80	1	No_Conversion	0			FEMALE	Negative	2	2	2	Negative	M0	Positive	N1	0	0	Basal	Basal-like		Basal	-13	-12	enrollment	T_Other	T2	LIVING	TCGA-C8-A12K-01	High	C4-BRCA/Basal	cluster 5	BRCA basal-like c8	BRCA basal-like c6	BRCA basal-like c8	miRNA cluster 4	cluster 3	mutation cluster 8	TCGA-C8-A12K	TCGA Breast Cancer (BRCA)	breast invasive carcinoma	Breast					80	Right Upper Inner Quadrant	Other (specify)
TCGA-C8-A12L-01	Stage IIA	67	1	Stage IIA	0		Negative	FEMALE	Positive	1	1	1	Negative	M0	Negative	N0	0	0	Her2	HER2-enriched	Negative	Her2	-11	-9	enrollment	T_Other	T2	LIVING	TCGA-C8-A12L-01	High	C3-BRCA/Luminal	cluster 4	BRCA CIMP c7	BRCA basal-like c6	BRCA nonbasal-like c7	miRNA cluster 4	cluster 4	mutation cluster 3	TCGA-C8-A12L	TCGA Breast Cancer (BRCA)	breast invasive carcinoma	Breast					67	Right	Axillary lymph node dissection alone
TCGA-C8-A12M-01	Stage IIA	70	5	Stage IIA	0		Positive	FEMALE		4	1	4	Negative	M0	Negative	N0	0	0	LumB	Luminal B	Negative	LumA/B	-10	-5	enrollment	T_Other	T2	LIVING	TCGA-C8-A12M-01	High	C3-BRCA/Luminal	cluster 3	BRCA CIMP c7	BRCA nonbasal-like c8	BRCA nonbasal-like c7	miRNA cluster 4	cluster 4	mutation c1uster 9	TCGA-C8-A12M	TCGA Breast Cancer (BRCA)	breast invasive carcinoma	Breast					70	Left	Axillary lymph node dissection alone
TCGA-C8-A12N-01	Stage IIA	58	4	Stage IIA	0		Positive	FEMALE	Negative	3	3	3	Negative	M0	Negative	N0	0	0	LumA	Luminal A	Positive	ReacI	-12	-3	enrollment	T_Other	T2	LIVING	TCGA-C8-A12N-01	Kirc+	C3-BRCA/Luminal	cluster 2	BRCA non-CIMP c9	BRCA nonbasal-like c8	BRCA nonbasal-like c7	miRNA cluster 4	cluster 6	mutation cluster 4	TCGA-C8-A12N	TCGA Breast Cancer (BRCA)	breast invasive carcinoma	Breast					58	Right	Axillary lymph node dissection alone
TCGA-C8-A12O-01	Stage IIA	50		Stage IIA	0		Positive	FEMALE					Negative	M0	Negative	N0	0	0	LumA	Luminal A	Positive	Her2	-2	0	enrollment	T_Other	T2	LIVING	TCGA-C8-A12O-01		C3-BRCA/Luminal	cluster 1	Cluster 5	BRCA nonbasal-like c8	BRCA nonbasal-like c7	miRNA cluster 4	cluster 4	mutation cluster 13	TCGA-C8-A12O	TCGA Breast Cancer (BRCA)	breast invasive carcinoma	Breast					50	Left	Axillary lymph node dissection alone
TCGA-C8-A12P-01	Stage IIB	55	3	No_Conversion	0		Negative	FEMALE	Positive	1	1	1	Negative	M0	Positive	N1	0	0	Her2	HER2-enriched	Negative	Her2	-11	-10	enrollment	T_Other	T2	LIVING	TCGA-C8-A12P-01	High	C3-BRCA/Luminal	cluster 1	BRCA non-CIMP c9	BRCA basal-like c6	BRCA nonbasal-like c7	miRNA cluster 4	cluster 4	mutation cluster 5	TCGA-C8-A12P	TCGA Breast Cancer (BRCA)	breast invasive carcinoma	Breast					55	Left
TCGA-C8-A12Q-01	Stage IIIA	78	5	No_Conversion	0		Negative	FEMALE	Positive	1	1	1	Negative	M0	Positive	N2	0	0	Her2	HER2-enriched	Negative	Her2	-11	-5	enrollment	T1	T1	LIVING	TCGA-C8-A12Q-01	High	C3-BRCA/Luminal	cluster 2	Cluster 5	BRCA basal-like c6	BRCA nonbasal-like c7	miRNA cluster 4	cluster 4	mutation cluster 5	TCGA-C8-A12Q	TCGA Breast Cancer (BRCA)	breast invasive carcinoma	Breast			NO		78	Left	Axillary lymph node dissection alone
TCGA-C8-A12T-01	Stage IIA	43	4	Stage IIA	0		Positive	FEMALE	Positive	1	1	1	Negative	M0	Negative	N0	0	0	Her2	HER2-enriched	Positive	ReacII	-2	-1	enrollment	T_Other	T2	LIVING	TCGA-C8-A12T-01	Squamous	C3-BRCA/Luminal	cluster 4	BRCA CIMP c7	BRCA nonbasal-like c8	BRCA nonbasal-like c7	miRNA cluster 4	cluster 4	mutation cluster 4	TCGA-C8-A12T	TCGA Breast Cancer (BRCA)	breast invasive carcinoma	Breast					43	Left	Axillary lymph node dissection alone
TCGA-C8-A12U-01	Stage IB	46	5	Stage IIB	0		Positive	FEMALE	Negative	1	1	4	Negative	M0	Positive	N1	0	0	LumB	Luminal B	Positive	Basal	-2	-5	enrollment	T_Other	T2	LIVING	TCGA-C8-A12U-01	High	C3-BRCA/Luminal	cluster 4	BRCA CIMP c7	BRCA nonbasal-like c8	BRCA nonbasal-like c7	miRNA cluster 4	cluster 5	mutation cluster 4	TCGA-C8-A12U	TCGA Breast Cancer (BRCA)	breast invasive carcinoma	Breast					46	Right	Axillary lymph node dissection alone
TCGA-C8-A12V-01	Stage IIA	55	1	Stage IIA	0		Negative	FEMALE	Negative	2	2	2	Negative	M0	Negative	N0	0	0	Basal	Basal-like	Negative	Basal	-13	-12	enrollment	T_Other	T2	LIVING	TCGA-C8-A12V-01	BRCA-LUAD+	C4-BRCA/Basal	cluster 5	Low purity c2	BRCA basal-like c6	BRCA basal-like c8	miRNA cluster 7	cluster 3	mutation c1uster 9	TCGA-C8-A12V	TCGA Breast Cancer (BRCA)	breast invasive carcinoma	Breast					55	Right	Axillary lymph node dissection alone
TCGA-C8-A12W-01	Stage IIIB	49	3	Stage IIIB	0		Positive	FEMALE	Negative	1	1	4	Negative	M0	Positive	N1	0	0	LumB	Luminal B	Positive	ReacII	-2	-5	enrollment	T_Other	T4	LIVING	TCGA-C8-A12W-01	High	C3-BRCA/Luminal	cluster 4	BRCA CIMP c7	BRCA nonbasal-like c8	BRCA nonbasal-like c7	miRNA cluster 4	cluster 4	mutation cluster 5	TCGA-C8-A12W	TCGA Breast Cancer (BRCA)	breast invasive carcinoma	Breast					49	Left	Axillary lymph node dissection alone
TCGA-C8-A12X-01	Stage IIB	62	4	Stage IIB	0		Positive	FEMALE	Negative	4	3	4	Negative	M0	Positive	N1	0	0	LumA	Luminal B	Positive	LumA/B	-10	-3	enrollment	T_Other	T2	LIVING	TCGA-C8-A12X-01	Squamous	C3-BRCA/Luminal	cluster 3	BRCA CIMP c7	BRCA nonbasal-like c8	BRCA nonbasal-like c7	miRNA cluster 6	cluster 1	mutation c1uster 9	TCGA-C8-A12X	TCGA Breast Cancer (BRCA)	breast invasive carcinoma	Breast					62	Left	Axillary lymph node dissection alone
TCGA-C8-A12Y-01	Stage IIB	44	2	Stage IIB	0			FEMALE	Negative	3	3	3	Negative	M0	Positive	N1	0	0	LumA	Luminal A		LumA	0	-3	enrollment	T_Other	T2	LIVING	TCGA-C8-A12Y-01	Iq	C3-BRCA/Luminal	cluster 2	BRCA non-CIMP c9	BRCA nonbasal-like c8	BRCA nonbasal-like c7	miRNA cluster 4	cluster 6	mutation cluster 4	TCGA-C8-A12Y	TCGA Breast Cancer (BRCA)	breast invasive carcinoma	Breast					44	Left	Axillary lymph node dissection alone
TCGA-C8-A12Z-01	Stage II	45	2	Stage IIB	0		Negative	FEMALE	Positive	1	1	1	Negative	M0	Positive	N1	0	0	Her2	HER2-enriched	Negative	Her2	-11	-5	enrollment	T_Other	T2	LIVING	TCGA-C8-A12Z-01	BRCA-LUAD+	C3-BRCA/Luminal	cluster 4	BRCA CIMP c7	BRCA basal-like c6	BRCA nonbasal-like c7	miRNA cluster 4	cluster 4	mutation cluster 3	TCGA-C8-A12Z	TCGA Breast Cancer (BRCA)	breast invasive carcinoma	Breast					45	Right	Axillary lymph node dissection alone
TCGA-C8-A130-01	Stage IIIA	52	1	Stage IIIA	0		Positive	FEMALE	Equivocal	1	1	1	Negative	M0	Positive	N2	0	0	LumB	HER2-enriched	Positive	Her2	-2	0	enrollment	T_Other	T3	LIVING	TCGA-C8-A130-01	High	C3-BRCA/Luminal	cluster 2	BRCA non-CIMP c9	BRCA nonbasal-like c8	BRCA nonbasal-like c7	miRNA cluster 4	cluster 4	mutation cluster 3	TCGA-C8-A130	TCGA Breast Cancer (BRCA)	breast invasive carcinoma	Breast					52	Left	Axillary lymph node dissection alone
TCGA-C8-A131-01	Stage III	82	1	Stage IIIA	0		Negative	FEMALE	Negative	2	2	2	Negative	M0	Positive	N2	0	0	Basal	Basal-like	Negative	ReacII	-13	0	enrollment	T_Other	T2	LIVING	TCGA-C8-A131-01	High	C3-BRCA/Luminal	cluster 1	BRCA non-CIMP c9	OV-like c4	BRCA nonbasal-like c7	miRNA cluster 12	cluster 5	mutation cluster 2	TCGA-C8-A131	TCGA Breast Cancer (BRCA)	breast invasive carcinoma	Breast					82	Left	Axillary lymph node dissection alone
TCGA-C8-A132-01	Stage II	56	5	Stage IIB	0		Positive	FEMALE	Positive	2	3	3	Negative	M0	Positive	N1	0	0	LumA	Luminal A	Positive	Her2	-2	-4	enrollment	T_Other	T2	LIVING	TCGA-C8-A132-01	Squamous	C3-BRCA/Luminal	cluster 1	BRCA non-CIMP c9	BRCA basal-like c6	BRCA nonbasal-like c7	miRNA c1uster 9	cluster 5	mutation c1uster 9	TCGA-C8-A132	TCGA Breast Cancer (BRCA)	breast invasive carcinoma	Breast					56	Left	Axillary lymph node dissection alone
TCGA-C8-A133-01	Stage IIIA	65	1	Stage IIIA	0		Positive	FEMALE	Negative	3	3	3	Negative	M0	Positive	N1	0	0	LumA	Luminal A	Positive	LumA/B	-12	-3	enrollment	T_Other	T3	LIVING	TCGA-C8-A133-01	Kirc+	C3-BRCA/Luminal	cluster 2	BRCA non-CIMP c9	BRCA nonbasal-like c8	BRCA nonbasal-like c7	miRNA cluster 6	cluster 1	mutation cluster 4	TCGA-C8-A133	TCGA Breast Cancer (BRCA)	breast invasive carcinoma	Breast					65	Right	Axillary lymph node dissection alone
TCGA-C8-A134-01	Stage IIA	52	1	No_Conversion	0		Negative	FEMALE	Negative	2	2	2	Negative	M0	Negative	N0	0	0	Basal	Basal-like	Negative	Basal	-13	-12	enrollment	T_Other	T2	LIVING	TCGA-C8-A134-01	BRCA-LUAD+	C8-BLCA	cluster 4	Cluster 6	BRCA basal-like c6	BRCA basal-like c8	miRNA cluster 5	cluster 6	mutation cluster 5	TCGA-C8-A134	TCGA Breast Cancer (BRCA)	breast invasive carcinoma	Breast					52	Left	Axillary lymph node dissection alone
TCGA-C8-A135-01	Stage II	64	1	Stage IIB	0		Negative	FEMALE	Positive	2	2	1	Negative	M0	Positive	N1	0	0	Her2	HER2-enriched	Negative	Her2	-11	-5	enrollment	T_Other	T2	LIVING	TCGA-C8-A135-01	High	C3-BRCA/Luminal	cluster 1	Cluster 5	BRCA basal-like c6	BRCA nonbasal-like c7	miRNA cluster 4	cluster 7	mutation cluster 3	TCGA-C8-A135	TCGA Breast Cancer (BRCA)	breast invasive carcinoma	Breast					64	Left	Axillary lymph node dissection alone
TCGA-C8-A137-01	Stage II	34	5	Stage IIB	3		Negative	FEMALE	Positive				Negative	M0	Positive	N1	3	0	Her2	HER2-enriched	Negative	Her2	-11	-5	enrollment	T_Other	T2	LIVING	TCGA-C8-A137-01	Kirc+	C3-BRCA/Luminal	cluster 4	BRCA CIMP c7	BRCA basal-like c6	BRCA nonbasal-like c7			mutation c1uster 9	TCGA-C8-A137	TCGA Breast Cancer (BRCA)	breast invasive carcinoma	Breast	NO	YES			34	Left	Axillary lymph node dissection alone
TCGA-C8-A138-01	Stage III	54	2	Stage IIIA	7		Positive	FEMALE	Positive	3	2	1	Negative	M0	Positive	N2	7	0	Her2	HER2-enriched	Negative	Basal	-2	-5	enrollment	T_Other	T2	LIVING	TCGA-C8-A138-01	High	C3-BRCA/Luminal	cluster 2	BRCA non-CIMP c9	BRCA nonbasal-like c8	BRCA nonbasal-like c7	miRNA cluster 6	cluster 1	mutation cluster 5	TCGA-C8-A138	TCGA Breast Cancer (BRCA)	breast invasive carcinoma	Breast					54	Left	Axillary lymph node dissection alone
TCGA-C8-A1HE-01	Stage IIA	59	2	Stage IIA	0		Positive	FEMALE	Negative				Negative	M0	Negative	N0	0	0	LumA		Positive				enrollment	T_Other	T2	LIVING	TCGA-C8-A1HE-01	Iq	C3-BRCA/Luminal	cluster 4	BRCA CIMP c7	BRCA nonbasal-like c8	BRCA nonbasal-like c7	miRNA cluster 14	cluster 2	mutation cluster 4	TCGA-C8-A1HE	TCGA Breast Cancer (BRCA)	breast invasive carcinoma	Breast					59	Right	Axillary lymph node dissection alone
TCGA-C8-A1HF-01	Stage IIA	48	2	Stage IIA	0		Negative	FEMALE	Positive				Negative	M0	Negative	N0	0	0	Her2	HER2-enriched	Positive		-11	-5	enrollment	T_Other	T2	LIVING	TCGA-C8-A1HF-01	Squamous	C3-BRCA/Luminal	cluster 2	BRCA non-CIMP c9	BRCA basal-like c6	BRCA nonbasal-like c7	miRNA cluster 4	cluster 6	mutation cluster 3	TCGA-C8-A1HF	TCGA Breast Cancer (BRCA)	breast invasive carcinoma	Breast					48	Left	Axillary lymph node dissection alone
TCGA-C8-A1HG-01	Stage IIA	50	4	Stage IIA	0		Positive	FEMALE	Negative				Negative	M0	Negative	N0	0	0	LumB	Luminal B	Positive		-2	-5	enrollment	T_Other	T2	LIVING	TCGA-C8-A1HG-01	High	C3-BRCA/Luminal	cluster 5	Cluster 5	BRCA nonbasal-like c8	BRCA nonbasal-like c7	miRNA cluster 7	cluster 3	mutation cluster 8	TCGA-C8-A1HG	TCGA Breast Cancer (BRCA)	breast invasive carcinoma	Breast					50	Right	Axillary lymph node dissection alone
TCGA-C8-A1HI-01	Stage IIIA	40	2	Stage IIIA	2		Positive	FEMALE	Negative				Negative	M0	Positive	N2	2	0	LumA	Luminal A	Positive		-5	0	enrollment	T_Other	T2	LIVING	TCGA-C8-A1HI-01	High	C3-BRCA/Luminal	cluster 2	BRCA non-CIMP c9	BRCA basal-like c6	BRCA nonbasal-like c7	miRNA cluster 13	cluster 6	mutation c1uster 9	TCGA-C8-A1HI	TCGA Breast Cancer (BRCA)	breast invasive carcinoma	Breast					40	Right	Axillary lymph node dissection alone
TCGA-C8-A1HJ-01	Stage II	53	1	Stage IIA	5		Negative	FEMALE	Negative				Negative	M0	Negative	N0	5	0	Basal		Negative				enrollment	T_Other	T2	LIVING	TCGA-C8-A1HJ-01	High	C4-BRCA/Basal	cluster 5	BRCA basal-like c8	squamous c3	BRCA basal-like c8	miRNA cluster 12	cluster 5	mutation cluster 13	TCGA-C8-A1HJ	TCGA Breast Cancer (BRCA)	breast invasive carcinoma	Breast					53	Right	Axillary lymph node dissection alone
TCGA-C8-A1HK-01	Stage IIB	53	5	Stage IIB	7		Negative	FEMALE	Positive				Negative	M0	Positive	N1	7	0	Her2		Negative				enrollment	T_Other	T2	LIVING	TCGA-C8-A1HK-01	BRCA-LUAD+	C3-BRCA/Luminal	cluster 4	BRCA non-CIMP c9	BRCA basal-like c6	BRCA nonbasal-like c7	miRNA cluster 6	cluster 1	mutation cluster 5	TCGA-C8-A1HK	TCGA Breast Cancer (BRCA)	breast invasive carcinoma	Breast					53	Right	Axillary lymph node dissection alone
TCGA-C8-A1HL-01	Stage IIIA	38	5	Stage IIIA	2		Positive	FEMALE	Positive				Negative	M0	Positive	N1	2	0	LumB	Luminal B	Negative		-2	-3	enrollment	T_Other	T3	LIVING	TCGA-C8-A1HL-01	BRCA-LUAD+	C3-BRCA/Luminal	cluster 2	BRCA non-CIMP c9	BRCA nonbasal-like c8	BRCA nonbasal-like c7	miRNA cluster 12	cluster 4	mutation c1uster 9	TCGA-C8-A1HL	TCGA Breast Cancer (BRCA)	breast invasive carcinoma	Breast					38	Left	Axillary lymph node dissection alone
TCGA-C8-A1HM-01	Stage II	74	3	Stage IIA	6		Positive	FEMALE	Negative				Negative	M0	Negative	N0	6	0	LumB	Luminal B	Positive		-2	-5	enrollment	T_Other	T2	LIVING	TCGA-C8-A1HM-01	High	C3-BRCA/Luminal	cluster 4	BRCA CIMP c7	BRCA nonbasal-like c8	BRCA nonbasal-like c7	miRNA cluster 4	cluster 4	mutation cluster 13	TCGA-C8-A1HM	TCGA Breast Cancer (BRCA)	breast invasive carcinoma	Breast					74	Left	Axillary lymph node dissection alone
TCGA-C8-A1HN-01	Stage II	56		Stage IIA	2		Positive	FEMALE	Equivocal				Negative	M0	Negative	N0	2	0	LumB	Luminal B	Positive		-10	-5	enrollment	T_Other	T2	LIVING	TCGA-C8-A1HN-01	High	C3-BRCA/Luminal	cluster 2	BRCA non-CIMP c9	BRCA nonbasal-like c8	BRCA nonbasal-like c7	miRNA c1uster 10	cluster 7	mutation c1uster 9	TCGA-C8-A1HN	TCGA Breast Cancer (BRCA)	breast invasive carcinoma	Breast					56	Left	Axillary lymph node dissection alone
TCGA-C8-A1HO-01	Stage III	34	5	Stage IIIC	0		Positive	FEMALE	Negative				Negative	M0	Positive	N3	0	0	LumA		Positive				enrollment	T_Other	T3	LIVING	TCGA-C8-A1HO-01	Kirc+	C3-BRCA/Luminal	cluster 3	BRCA CIMP c7	BRCA nonbasal-like c8	BRCA nonbasal-like c7	miRNA cluster 12	cluster 5	mutation c1uster 9	TCGA-C8-A1HO	TCGA Breast Cancer (BRCA)	breast invasive carcinoma	Breast					34	Left Upper Inner Quadrant
TCGA-C8-A26V-01	Stage III	47	1	Stage IIIA	9		Positive	FEMALE	Negative				Negative	M0	Positive	N2	9	0	LumB		Positive				enrollment	T_Other	T3	LIVING	TCGA-C8-A26V-01	Kirc+	C3-BRCA/Luminal	cluster 4	BRCA CIMP c7	BRCA nonbasal-like c8	BRCA nonbasal-like c7	miRNA cluster 12		mutation cluster 8	TCGA-C8-A26V	TCGA Breast Cancer (BRCA)	breast invasive carcinoma	Breast					47	Right
TCGA-C8-A26W-01	Stage II	58	1	Stage IIB	7		Positive	FEMALE	Positive				Negative	M0	Positive	N1	7	0	LumB		Positive				enrollment	T_Other	T2	LIVING	TCGA-C8-A26W-01	Squamous	C3-BRCA/Luminal	cluster 1	BRCA non-CIMP c9	BRCA nonbasal-like c8	BRCA nonbasal-like c7	miRNA cluster 12		mutation cluster 8	TCGA-C8-A26W	TCGA Breast Cancer (BRCA)	breast invasive carcinoma	Breast					58	Left Upper Outer Quadrant
TCGA-C8-A26X-01	Stage II	58	4	Stage IIA	11		Negative	FEMALE	Negative				Negative	M0	Positive	N1	11	0	Her2		Negative				enrollment	T1	T1	LIVING	TCGA-C8-A26X-01	High	C3-BRCA/Luminal	cluster 4	BRCA CIMP c7	BRCA basal-like c6	BRCA nonbasal-like c7	miRNA cluster 7		mutation cluster 3	TCGA-C8-A26X	TCGA Breast Cancer (BRCA)	breast invasive carcinoma	Breast					58	Right Upper Outer Quadrant
TCGA-C8-A26Y-01	Stage II	90	2	Stage IIA	13		Negative	FEMALE	Negative				Negative	M0	Negative	N0	13	0	Her2		Negative				enrollment	T_Other	T2	LIVING	TCGA-C8-A26Y-01	BRCA-LUAD+	C3-BRCA/Luminal	cluster 4	BRCA CIMP c7	BRCA basal-like c6	BRCA nonbasal-like c7	miRNA cluster 4			TCGA-C8-A26Y	TCGA Breast Cancer (BRCA)	breast invasive carcinoma	Breast					90	Left Upper Outer Quadrant
TCGA-C8-A26Z-01	Stage IIA	59	3	Stage IIA	4		Positive	FEMALE	Negative				Negative	M0	Negative	N0	4	0	LumA		Positive				enrollment	T_Other	T2	LIVING	TCGA-C8-A26Z-01	High	C3-BRCA/Luminal	cluster 4	BRCA non-CIMP c9	BRCA nonbasal-like c8	BRCA nonbasal-like c7	miRNA cluster 14		mutation c1uster 9	TCGA-C8-A26Z	TCGA Breast Cancer (BRCA)	breast invasive carcinoma	Breast					59	Right Upper Inner Quadrant
TCGA-C8-A273-01	Stage IIB	29	3	Stage IIB	6		Positive	FEMALE	Negative				Negative	M0	Positive	N1	6	0	LumA		Positive				enrollment	T_Other	T2	LIVING	TCGA-C8-A273-01	BRCA-LUAD+	C3-BRCA/Luminal	cluster 4	BRCA CIMP c7	BRCA nonbasal-like c8	BRCA nonbasal-like c7	miRNA cluster 4		mutation c1uster 9	TCGA-C8-A273	TCGA Breast Cancer (BRCA)	breast invasive carcinoma	Breast					29	Right Upper Inner Quadrant	Axillary lymph node dissection alone
TCGA-C8-A274-01	Stage IIA	63	2	Stage IIA	1		Positive	FEMALE	Negative				Negative	M0	Negative	N0	1	0	LumB		Positive				enrollment	T_Other	T2	LIVING	TCGA-C8-A274-01	BRCA-LUAD+	C3-BRCA/Luminal	cluster 3	BRCA CIMP c7	BRCA nonbasal-like c8	BRCA nonbasal-like c7	miRNA cluster 13		mutation cluster 1	TCGA-C8-A274	TCGA Breast Cancer (BRCA)	breast invasive carcinoma	Breast					63	Right
TCGA-C8-A275-01	Stage IIA	56	3	Stage IIA	1			FEMALE	Positive				Negative	M0	Positive	N1	1	0	Her2						enrollment	T1	T1	LIVING	TCGA-C8-A275-01	Kirc+	C3-BRCA/Luminal	cluster 4	BRCA CIMP c7	BRCA basal-like c6	BRCA nonbasal-like c7	miRNA cluster 4		mutation cluster 5	TCGA-C8-A275	TCGA Breast Cancer (BRCA)	breast invasive carcinoma	Breast					56	Left Upper Outer Quadrant
TCGA-C8-A278-01	Stage IIIA	61	4	Stage IIIA	1		Negative	FEMALE	Positive				Negative	M0	Positive	N2	1	0	Her2		Negative				enrollment	T_Other	T2	LIVING	TCGA-C8-A278-01	High	C3-BRCA/Luminal	cluster 4	BRCA CIMP c7	BRCA basal-like c6	BRCA nonbasal-like c7	miRNA cluster 7		mutation cluster 3	TCGA-C8-A278	TCGA Breast Cancer (BRCA)	breast invasive carcinoma	Breast					61	Left
TCGA-C8-A27A-01	Stage IIB	48	4	Stage IIB	371		Positive	FEMALE	Negative				Negative	M0	Positive	N1	371	0	LumB		Positive				enrollment	T_Other	T2	LIVING	TCGA-C8-A27A-01	Squamous	C3-BRCA/Luminal	cluster 3	BRCA CIMP c7	BRCA nonbasal-like c8	BRCA nonbasal-like c7	miRNA cluster 12	cluster 5	mutation cluster 5	TCGA-C8-A27A	TCGA Breast Cancer (BRCA)	breast invasive carcinoma	Breast					48	Right Upper Outer Quadrant
TCGA-C8-A27B-01	Stage IIB	48	1	Stage IIB	30		Negative	FEMALE	Negative				Negative	M0	Negative	N0	30	0	Basal		Negative				enrollment	T_Other	T3	LIVING	TCGA-C8-A27B-01	High	C4-BRCA/Basal	cluster 5	BRCA basal-like c8	squamous c3	BRCA basal-like c8	miRNA cluster 4	cluster 5	mutation cluster 13	TCGA-C8-A27B	TCGA Breast Cancer (BRCA)	breast invasive carcinoma	Breast					48	Left
TCGA-C8-A3M7-01																			LumA										TCGA-C8-A3M7-01	Iq	C3-BRCA/Luminal		BRCA CIMP c7	KIRC-like c1	BRCA nonbasal-like c7	miRNA cluster 5			TCGA-C8-A3M7	TCGA Breast Cancer (BRCA)	breast invasive carcinoma	Breast	NO	NO			60	Left Upper Inner Quadrant	Axillary lymph node dissection alone
TCGA-C8-A3M8-01																			LumB										TCGA-C8-A3M8-01	High	C3-BRCA/Luminal		BRCA CIMP c7	BRCA nonbasal-like c8	BRCA nonbasal-like c7	miRNA cluster 4			TCGA-C8-A3M8	TCGA Breast Cancer (BRCA)	breast invasive carcinoma	Breast					68	Right Upper Outer Quadrant	Axillary lymph node dissection alone
TCGA-C8-A8HP-01																													TCGA-C8-A8HP-01										TCGA-C8-A8HP	TCGA Breast Cancer (BRCA)	breast invasive carcinoma	Breast					59	Left Upper Outer Quadrant	Axillary lymph node dissection alone
TCGA-C8-A8HQ-01																													TCGA-C8-A8HQ-01										TCGA-C8-A8HQ	TCGA Breast Cancer (BRCA)	breast invasive carcinoma	Breast					53	Left	Axillary lymph node dissection alone
TCGA-C8-A8HR-01																													TCGA-C8-A8HR-01										TCGA-C8-A8HR	TCGA Breast Cancer (BRCA)	breast invasive carcinoma	Breast					49	Right	Axillary lymph node dissection alone
TCGA-C8-A9FZ-01																													TCGA-C8-A9FZ-01										TCGA-C8-A9FZ	TCGA Breast Cancer (BRCA)	breast invasive carcinoma	Breast					49	Left	Axillary lymph node dissection alone
TCGA-D8-A13Y-01	Stage IA	52	5	No_Conversion	362		Positive	FEMALE	Negative	3	2	4	Negative	M0	Negative	N0	362	0	LumB	Luminal B	Positive	Basal	-2	-6	followup	T1	T1	LIVING	TCGA-D8-A13Y-01	Squamous	C3-BRCA/Luminal	cluster 2	BRCA non-CIMP c9	BRCA nonbasal-like c8	GBM-like c6	miRNA cluster 6	cluster 1	mutation cluster 2	TCGA-D8-A13Y	TCGA Breast Cancer (BRCA)	breast invasive carcinoma	Breast					52	Right Upper Outer Quadrant	Axillary lymph node dissection alone
TCGA-D8-A13Z-01	Stage X	51	1	Stage IIIA	210		Negative	FEMALE	Negative	2	2	1	Negative	M0	Positive	N2	210	0	Her2	HER2-enriched	Negative	Basal	-13	-10	enrollment	T_Other	T2	LIVING	TCGA-D8-A13Z-01	High	C3-BRCA/Luminal	cluster 1	BRCA CIMP c7	BRCA basal-like c6	BRCA nonbasal-like c7	miRNA cluster 4	cluster 4	mutation cluster 5	TCGA-D8-A13Z	TCGA Breast Cancer (BRCA)	breast invasive carcinoma	Breast					51	Right Lower Outer Quadrant	Axillary lymph node dissection alone
TCGA-D8-A140-01	Stage IIB	62		Stage IIB	403		Positive	FEMALE	Positive				Negative	M0	Positive	N1	403	0	LumA	Luminal B	Positive	LumA/B	-10	-5	followup	T_Other	T2	LIVING	TCGA-D8-A140-01		C3-BRCA/Luminal	cluster 3	BRCA CIMP c7	BRCA nonbasal-like c8	BRCA nonbasal-like c7	miRNA cluster 4	cluster 6	mutation c1uster 9	TCGA-D8-A140	TCGA Breast Cancer (BRCA)	breast invasive carcinoma	Breast					62	Left Upper Outer Quadrant|Left	Axillary lymph node dissection alone
TCGA-D8-A141-01	Stage X	40	2	Stage IIA	113		Positive	FEMALE	Negative				Negative	M0	Positive	N1	113	0	LumA	Luminal A	Positive		-5	-4	enrollment	T1	T1	LIVING	TCGA-D8-A141-01	BRCA-LUAD+	C3-BRCA/Luminal	cluster 1	BRCA non-CIMP c9		BRCA nonbasal-like c7	miRNA cluster 4	cluster 4	mutation cluster 4	TCGA-D8-A141	TCGA Breast Cancer (BRCA)	breast invasive carcinoma	Breast					40	Right	Axillary lymph node dissection alone
TCGA-D8-A142-01	Stage IIB	74	1	Stage IIB	425		Negative	FEMALE	Negative	2	2	2	Negative	M0	Negative	N0	425	0	Basal	Basal-like	Negative	X	-13	0	followup	T_Other	T3	LIVING	TCGA-D8-A142-01	High	C4-BRCA/Basal	cluster 5	Cluster 5	BRCA basal-like c6	BRCA basal-like c8	miRNA c1uster 9	cluster 3	mutation cluster 5	TCGA-D8-A142	TCGA Breast Cancer (BRCA)	breast invasive carcinoma	Breast					74	Left Lower Outer Quadrant|Left	Axillary lymph node dissection alone
TCGA-D8-A143-01	Stage IIA	51	3	Stage IIA	431		Negative	FEMALE	Negative				Negative	M0	Negative	N0	431	0	Basal	Basal-like	Negative	Basal	-13	0	followup	T_Other	T2	LIVING	TCGA-D8-A143-01	High	C3-BRCA/Luminal	cluster 5	BRCA CIMP c7	squamous c3	BRCA nonbasal-like c7			mutation cluster 3	TCGA-D8-A143	TCGA Breast Cancer (BRCA)	breast invasive carcinoma	Breast					51	Left Lower Inner Quadrant	Axillary lymph node dissection alone
TCGA-D8-A145-01	Stage IIA	80	1	Stage IIA	410		Positive	FEMALE	Negative	3	4	3	Negative	M0	Positive	N1	410	0	LumA	Luminal A	Positive	ReacI	-5	-7	followup	T1	T1	LIVING	TCGA-D8-A145-01	COAD-READ	C3-BRCA/Luminal	cluster 2	BRCA non-CIMP c9	BRCA nonbasal-like c8	BRCA nonbasal-like c7	miRNA cluster 13	cluster 6	mutation c1uster 9	TCGA-D8-A145	TCGA Breast Cancer (BRCA)	breast invasive carcinoma	Breast					80	Right Upper Inner Quadrant|Right	Sentinel lymph node biopsy plus axillary dissection
TCGA-D8-A146-01	Stage IIA	57		Stage IIA	344		Positive	FEMALE	Negative				Negative	M0	Negative	N0	344	0	LumA		Positive				enrollment	T_Other	T2	LIVING	TCGA-D8-A146-01	Iq	C3-BRCA/Luminal		BRCA non-CIMP c9	BRCA nonbasal-like c8	BRCA nonbasal-like c7	miRNA cluster 4		mutation cluster 4	TCGA-D8-A146	TCGA Breast Cancer (BRCA)	breast invasive carcinoma	Breast					57	Right Upper Outer Quadrant|Right	Axillary lymph node dissection alone
TCGA-D8-A147-01	Stage X	45	1	Stage IIA	2		Negative	FEMALE	Negative	2	2	2	Negative	M0	Negative	N0	2	0	Basal	Basal-like	Negative	Basal	-13	-12	enrollment	T_Other	T2	LIVING	TCGA-D8-A147-01	High	C4-BRCA/Basal	cluster 5	BRCA basal-like c8	BRCA basal-like c6	BRCA basal-like c8	miRNA cluster 4	cluster 5	mutation cluster 13	TCGA-D8-A147	TCGA Breast Cancer (BRCA)	breast invasive carcinoma	Breast					45	Right Lower Outer Quadrant	Sentinel node biopsy alone
TCGA-D8-A1J8-01	Stage IIB	77	2	Stage IIB	256		Positive	FEMALE	Negative				Negative	M0	Positive	N1	256	0	LumB		Positive				enrollment	T_Other	T2	LIVING	TCGA-D8-A1J8-01	High	C3-BRCA/Luminal	cluster 3	BRCA CIMP c7	BRCA nonbasal-like c8	BRCA nonbasal-like c7	miRNA cluster 4	cluster 4		TCGA-D8-A1J8	TCGA Breast Cancer (BRCA)	breast invasive carcinoma	Breast					77	Right Upper Outer Quadrant	Axillary lymph node dissection alone
TCGA-D8-A1J9-01	Stage IA	48	2	Stage I	248		Positive	FEMALE	Positive				Negative	M0	Negative	N0	248	0	LumB		Negative				enrollment	T1	T1	LIVING	TCGA-D8-A1J9-01	High	C3-BRCA/Luminal	cluster 3	BRCA CIMP c7	BRCA basal-like c6	BRCA nonbasal-like c7	miRNA cluster 6	cluster 1	mutation cluster 8	TCGA-D8-A1J9	TCGA Breast Cancer (BRCA)	breast invasive carcinoma	Breast					48	Left Upper Outer Quadrant	Axillary lymph node dissection alone
TCGA-D8-A1JA-01	Stage X	60	1	Stage IIIB	18		Negative	FEMALE	Positive				Negative	M0	Negative	N0	18	0	Her2		Negative				enrollment	T_Other	T4	LIVING	TCGA-D8-A1JA-01	Iq	C3-BRCA/Luminal	cluster 4	BRCA CIMP c7	BRCA basal-like c6	BRCA nonbasal-like c7	miRNA cluster 12	cluster 5		TCGA-D8-A1JA	TCGA Breast Cancer (BRCA)	breast invasive carcinoma	Breast	NO	YES	NO		60	Left Upper Outer Quadrant	No axillary staging
TCGA-D8-A1JB-01	Stage IIB	54	3	Stage IIB	0		Positive	FEMALE	Positive				Negative	M0	Positive	N1	0	0	LumA		Positive				enrollment	T_Other	T2	LIVING	TCGA-D8-A1JB-01	High	C3-BRCA/Luminal	cluster 1	BRCA non-CIMP c9	BRCA nonbasal-like c8	BRCA nonbasal-like c7	miRNA cluster 13	cluster 6	mutation c1uster 9	TCGA-D8-A1JB	TCGA Breast Cancer (BRCA)	breast invasive carcinoma	Breast					54	Right Upper Outer Quadrant	Axillary lymph node dissection alone
TCGA-D8-A1JC-01	Stage IIIA	59	5	Stage IIIA	178		Positive	FEMALE	Negative				Negative	M0	Positive	N2	178	0	LumB		Positive				enrollment	T_Other	T2	LIVING	TCGA-D8-A1JC-01	BRCA-LUAD+	C3-BRCA/Luminal	cluster 2	BRCA non-CIMP c9	BRCA nonbasal-like c8	BRCA nonbasal-like c7	miRNA cluster 4	cluster 4	mutation c1uster 9	TCGA-D8-A1JC	TCGA Breast Cancer (BRCA)	breast invasive carcinoma	Breast					59	Left Upper Outer Quadrant	Axillary lymph node dissection alone
TCGA-D8-A1JD-01	Stage IIB	41	5	Stage IIB	273		Positive	FEMALE	Negative				Negative	M0	Positive	N1	273	0	LumB		Positive				enrollment	T_Other	T2	LIVING	TCGA-D8-A1JD-01	High	C3-BRCA/Luminal	cluster 2	BRCA non-CIMP c9	BRCA nonbasal-like c8	BRCA nonbasal-like c7	miRNA cluster 4	cluster 4	mutation cluster 4	TCGA-D8-A1JD	TCGA Breast Cancer (BRCA)	breast invasive carcinoma	Breast					41	Left Upper Outer Quadrant	Axillary lymph node dissection alone
TCGA-D8-A1JE-01	Stage IIA	62	2	Stage IIA	57		Positive	FEMALE	Negative				Negative	M0	Positive	N1	57	0	LumB		Positive				enrollment	T1	T1	LIVING	TCGA-D8-A1JE-01	Squamous	C3-BRCA/Luminal	cluster 2	BRCA non-CIMP c9	BRCA nonbasal-like c8	BRCA nonbasal-like c7	miRNA cluster 4	cluster 4	mutation cluster 4	TCGA-D8-A1JE	TCGA Breast Cancer (BRCA)	breast invasive carcinoma	Breast					62	Left Upper Outer Quadrant	Axillary lymph node dissection alone
TCGA-D8-A1JF-01	Stage IIIA	79	3	Stage IIIA	96		Negative	FEMALE	Negative				Negative	M0	Positive	N2	96	0	Her2		Negative				enrollment	T1	T1	LIVING	TCGA-D8-A1JF-01	COAD-READ	C3-BRCA/Luminal	cluster 1	BRCA CIMP c7	BRCA basal-like c6	BRCA nonbasal-like c7	miRNA cluster 7	cluster 3	mutation cluster 8	TCGA-D8-A1JF	TCGA Breast Cancer (BRCA)	breast invasive carcinoma	Breast					79	Left Upper Outer Quadrant	Axillary lymph node dissection alone
TCGA-D8-A1JG-01	Stage IIA	62	1	Stage IIA	187		Negative	FEMALE	Negative				Negative	M0	Negative	N0	187	0	Her2		Negative				enrollment	T_Other	T2	LIVING	TCGA-D8-A1JG-01	BRCA-LUAD+	C3-BRCA/Luminal	cluster 4	BRCA CIMP c7	BRCA basal-like c6	BRCA nonbasal-like c7	miRNA cluster 7	cluster 3	mutation cluster 5	TCGA-D8-A1JG	TCGA Breast Cancer (BRCA)	breast invasive carcinoma	Breast					62	Right Upper Outer Quadrant	Sentinel node biopsy alone
TCGA-D8-A1JH-01	Stage IA	56	1	Stage I	426		Positive	FEMALE	Negative				Negative	M0	Negative	N0	426	0	LumA		Positive				followup	T1	T1	LIVING	TCGA-D8-A1JH-01	Quiet	C3-BRCA/Luminal	cluster 4	BRCA non-CIMP c9	BRCA nonbasal-like c8	BRCA nonbasal-like c7	miRNA cluster 14	cluster 6	mutation cluster 4	TCGA-D8-A1JH	TCGA Breast Cancer (BRCA)	breast invasive carcinoma	Breast					56	Right Lower Outer Quadrant	Axillary lymph node dissection alone
TCGA-D8-A1JI-01	Stage IIA	54	2	Stage IIA	21		Positive	FEMALE	Negative				Negative	M0	Positive	N1	21	0	LumB		Positive				enrollment	T1	T1	LIVING	TCGA-D8-A1JI-01	BRCA-LUAD+	C3-BRCA/Luminal	cluster 4	BRCA non-CIMP c9	BRCA nonbasal-like c8	BRCA nonbasal-like c7	miRNA cluster 6	cluster 1	mutation c1uster 9	TCGA-D8-A1JI	TCGA Breast Cancer (BRCA)	breast invasive carcinoma	Breast					54	Right Upper Outer Quadrant	Axillary lymph node dissection alone
TCGA-D8-A1JJ-01	Stage IIA	54	1	Stage IIA	274		Positive	FEMALE	Negative				Negative	M0	Negative	N0	274	0	LumB		Positive				enrollment	T_Other	T2	LIVING	TCGA-D8-A1JJ-01	BRCA-LUAD+	C3-BRCA/Luminal	cluster 4	BRCA non-CIMP c9	BRCA nonbasal-like c8	BRCA nonbasal-like c7	miRNA cluster 6	cluster 4	mutation cluster 3	TCGA-D8-A1JJ	TCGA Breast Cancer (BRCA)	breast invasive carcinoma	Breast					54	Right Upper Inner Quadrant	Sentinel node biopsy alone
TCGA-D8-A1JK-01	Stage IIA	90	1	Stage IIA	109		Negative	FEMALE	Negative				Negative	M0	Negative	N0	109	0	Basal		Positive				enrollment	T_Other	T2	LIVING	TCGA-D8-A1JK-01	High	C3-BRCA/Luminal	cluster 1	BRCA CIMP c7	BRCA basal-like c6	BRCA nonbasal-like c7	miRNA cluster 7	cluster 4	mutation cluster 3	TCGA-D8-A1JK	TCGA Breast Cancer (BRCA)	breast invasive carcinoma	Breast					90	Left Upper Inner Quadrant|Left Upper Outer Quadrant	Axillary lymph node dissection alone
TCGA-D8-A1JL-01	Stage IIA	72	3	Stage IIA	265		Negative	FEMALE	Negative				Negative	M0	Negative	N0	265	0	Basal		Negative				enrollment	T_Other	T2	LIVING	TCGA-D8-A1JL-01	High	C4-BRCA/Basal	cluster 5	BRCA basal-like c8	BRCA basal-like c6	BRCA basal-like c8	miRNA cluster 14	cluster 2	mutation cluster 5	TCGA-D8-A1JL	TCGA Breast Cancer (BRCA)	breast invasive carcinoma	Breast					72	Left Lower Inner Quadrant	Axillary lymph node dissection alone
TCGA-D8-A1JM-01	Stage IIB	59	1	Stage IIB	238		Positive	FEMALE	Negative				Negative	M0	Positive	N1	238	0	Basal		Negative				enrollment	T_Other	T2	LIVING	TCGA-D8-A1JM-01	High	C4-BRCA/Basal	cluster 4	BRCA basal-like c8	BRCA basal-like c6	BRCA basal-like c8			mutation c1uster 9	TCGA-D8-A1JM	TCGA Breast Cancer (BRCA)	breast invasive carcinoma	Breast					59	Right Upper Outer Quadrant	Axillary lymph node dissection alone
TCGA-D8-A1JN-01	Stage IIIC	80	2	Stage IIIC	217		Positive	FEMALE	Negative				Negative	M0	Positive	N3	217	0	LumA		Positive				enrollment	T_Other	T3	LIVING	TCGA-D8-A1JN-01	Iq	C3-BRCA/Luminal	cluster 3	BRCA CIMP c7	BRCA nonbasal-like c8	BRCA nonbasal-like c7	miRNA cluster 7	cluster 3	mutation cluster 4	TCGA-D8-A1JN	TCGA Breast Cancer (BRCA)	breast invasive carcinoma	Breast					80	Left	Axillary lymph node dissection alone
TCGA-D8-A1JP-01	Stage IA	73	1	Stage I	167		Positive	FEMALE	Negative				Negative	M0	Negative	N0	167	0	LumA		Positive				enrollment	T1	T1	LIVING	TCGA-D8-A1JP-01	High	C3-BRCA/Luminal	cluster 5	BRCA non-CIMP c9	BRCA nonbasal-like c8	BRCA nonbasal-like c7	miRNA cluster 13	cluster 6	mutation cluster 4	TCGA-D8-A1JP	TCGA Breast Cancer (BRCA)	breast invasive carcinoma	Breast					73	Left Upper Inner Quadrant	Sentinel node biopsy alone
TCGA-D8-A1JS-01	Stage IA	77	2	Stage I	371		Positive	FEMALE	Negative				Negative	M0	Negative	N0	371	0	LumA		Positive				followup	T1	T1	LIVING	TCGA-D8-A1JS-01	Iq	C3-BRCA/Luminal	cluster 4	BRCA non-CIMP c9	BRCA nonbasal-like c8	BRCA nonbasal-like c7	miRNA cluster 7	cluster 3	mutation cluster 4	TCGA-D8-A1JS	TCGA Breast Cancer (BRCA)	breast invasive carcinoma	Breast					77	Right Upper Outer Quadrant	Axillary lymph node dissection alone
TCGA-D8-A1JT-01	Stage IIA	70	4	Stage IIA	405		Positive	FEMALE	Negative				Negative	M0	Negative	N0	405	0	LumB		Positive				followup	T_Other	T2	LIVING	TCGA-D8-A1JT-01	BRCA-LUAD+	C3-BRCA/Luminal	cluster 4	BRCA CIMP c7	BRCA nonbasal-like c8	BRCA nonbasal-like c7	miRNA cluster 4	cluster 4	mutation c1uster 9	TCGA-D8-A1JT	TCGA Breast Cancer (BRCA)	breast invasive carcinoma	Breast					70	Left Lower Outer Quadrant	Axillary lymph node dissection alone
TCGA-D8-A1JU-01	Stage IA	51	2	Stage I	447		Positive	FEMALE	Negative				Negative	M0	Negative	N0	447	0	LumA		Positive				followup	T1	T1	LIVING	TCGA-D8-A1JU-01	BRCA-LUAD+	C3-BRCA/Luminal	cluster 5	BRCA non-CIMP c9	BRCA nonbasal-like c8	BRCA nonbasal-like c7	miRNA cluster 13	cluster 6	mutation cluster 4	TCGA-D8-A1JU	TCGA Breast Cancer (BRCA)	breast invasive carcinoma	Breast					51	Left Upper Outer Quadrant	Sentinel node biopsy alone
TCGA-D8-A1X5-01	Stage IIIC	81	5	Stage IIIC	171		Positive	FEMALE	Positive				Negative	M0	Positive	N3	171	0	LumB		Positive				enrollment	T_Other	T2	LIVING	TCGA-D8-A1X5-01	High	C3-BRCA/Luminal	cluster 3	BRCA CIMP c7	squamous c3	BRCA nonbasal-like c7	miRNA cluster 12	cluster 5	mutation cluster 5	TCGA-D8-A1X5	TCGA Breast Cancer (BRCA)	breast invasive carcinoma	Breast					81	Right Upper Outer Quadrant|Right Lower Inner Quadrant|Right Lower Outer Quadrant	Axillary lymph node dissection alone
TCGA-D8-A1X6-01	Stage IIIA	80	4	Stage IIIA	236		Positive	FEMALE	Negative				Negative	M0	Positive	N2	236	0	LumB		Positive				enrollment	T_Other	T3	LIVING	TCGA-D8-A1X6-01	Squamous	C3-BRCA/Luminal	cluster 4	BRCA non-CIMP c9	BRCA nonbasal-like c8	BRCA nonbasal-like c7	miRNA cluster 2	cluster 5	mutation c1uster 9	TCGA-D8-A1X6	TCGA Breast Cancer (BRCA)	breast invasive carcinoma	Breast					80	Left Upper Inner Quadrant|Left Upper Outer Quadrant	Axillary lymph node dissection alone
TCGA-D8-A1X7-01	Stage IIA	40	3	Stage IIA	85		Positive	FEMALE	Negative				Negative	M0	Negative	N0	85	0	LumB		Positive				enrollment	T_Other	T2	LIVING	TCGA-D8-A1X7-01	Iq	C3-BRCA/Luminal	cluster 4	BRCA non-CIMP c9	BRCA nonbasal-like c8	BRCA nonbasal-like c7	miRNA cluster 4	cluster 6	mutation c1uster 9	TCGA-D8-A1X7	TCGA Breast Cancer (BRCA)	breast invasive carcinoma	Breast					40	Right Upper Outer Quadrant	Axillary lymph node dissection alone
TCGA-D8-A1X8-01	Stage IIA	62	2	Stage IIIA	272		Positive	FEMALE	Negative				Negative	M0	Positive	N2	272	0	LumA		Indeterminate				enrollment	T1	T1	LIVING	TCGA-D8-A1X8-01	Iq	C3-BRCA/Luminal	cluster 4	BRCA non-CIMP c9	BRCA nonbasal-like c8	BRCA nonbasal-like c7	miRNA cluster 6	cluster 1	mutation cluster 4	TCGA-D8-A1X8	TCGA Breast Cancer (BRCA)	breast invasive carcinoma	Breast					62	Left Lower Outer Quadrant	Axillary lymph node dissection alone
TCGA-D8-A1X9-01	Stage IIA	66	5	Stage IIB	380		Positive	FEMALE	Negative				Negative	M0	Positive	N1	380	0	LumA		Positive				enrollment	T_Other	T2	LIVING	TCGA-D8-A1X9-01	Kirc+	C3-BRCA/Luminal	cluster 3	BRCA CIMP c7	BRCA nonbasal-like c8	BRCA nonbasal-like c7	miRNA cluster 4		mutation cluster 14	TCGA-D8-A1X9	TCGA Breast Cancer (BRCA)	breast invasive carcinoma	Breast					66	Left Lower Outer Quadrant	Axillary lymph node dissection alone
TCGA-D8-A1XA-01	Stage IA	64	1	Stage I	274		Positive	FEMALE	Negative				Negative	M0	Negative	N0	274	0	LumA		Positive				enrollment	T1	T1	LIVING	TCGA-D8-A1XA-01	Kirc+	C3-BRCA/Luminal	cluster 4	BRCA CIMP c7	BRCA nonbasal-like c8	BRCA nonbasal-like c7	miRNA cluster 14	cluster 2	mutation cluster 5	TCGA-D8-A1XA	TCGA Breast Cancer (BRCA)	breast invasive carcinoma	Breast					64	Left Upper Outer Quadrant	Sentinel node biopsy alone
TCGA-D8-A1XB-01	Stage IIB	62	4	Stage IIB	201		Positive	FEMALE	Negative				Negative	M0	Positive	N1	201	0	LumA		Positive				enrollment	T_Other	T2	LIVING	TCGA-D8-A1XB-01	Kirc+	C3-BRCA/Luminal	cluster 4	BRCA CIMP c7	BRCA nonbasal-like c8	BRCA nonbasal-like c7	miRNA cluster 4	cluster 4	mutation cluster 4	TCGA-D8-A1XB	TCGA Breast Cancer (BRCA)	breast invasive carcinoma	Breast					62	Right Upper Outer Quadrant	Axillary lymph node dissection alone
TCGA-D8-A1XC-01	Stage IIIB	85	3	Stage IIIB	81		Positive	FEMALE	Negative				Negative	M0	Positive	N1	81	0	LumA		Positive				enrollment	T_Other	T4	LIVING	TCGA-D8-A1XC-01	Iq	C3-BRCA/Luminal	cluster 2	BRCA non-CIMP c9	BRCA nonbasal-like c8	BRCA nonbasal-like c7	miRNA c1uster 10	cluster 7	mutation c1uster 9	TCGA-D8-A1XC	TCGA Breast Cancer (BRCA)	breast invasive carcinoma	Breast			NO		85	Right Upper Inner Quadrant	Axillary lymph node dissection alone
TCGA-D8-A1XD-01	Stage IIIA	36	4	Stage IIIA	155		Positive	FEMALE	Negative				Negative	M0	Positive	N2	155	0	LumA		Positive				enrollment	T1	T1	LIVING	TCGA-D8-A1XD-01	Kirc+	C3-BRCA/Luminal	cluster 4	BRCA non-CIMP c9	BRCA nonbasal-like c8	BRCA nonbasal-like c7	miRNA cluster 2	cluster 5		TCGA-D8-A1XD	TCGA Breast Cancer (BRCA)	breast invasive carcinoma	Breast					36	Left Upper Outer Quadrant	Axillary lymph node dissection alone
TCGA-D8-A1XF-01	Stage IIA	45	3	Stage IIA	197		Positive	FEMALE	Negative				Negative	M0	Negative	N0	197	0	LumB		Positive				enrollment	T_Other	T2	LIVING	TCGA-D8-A1XF-01	High	C3-BRCA/Luminal	cluster 3	BRCA CIMP c7	BRCA nonbasal-like c8	BRCA nonbasal-like c7	miRNA cluster 12	cluster 5	mutation c1uster 9	TCGA-D8-A1XF	TCGA Breast Cancer (BRCA)	breast invasive carcinoma	Breast					45	Left Upper Outer Quadrant	Axillary lymph node dissection alone
TCGA-D8-A1XG-01	Stage IIIB	86	3	Stage IIIB	196		Positive	FEMALE	Negative				Negative	M0	Positive	N1	196	0	LumA		Negative				enrollment	T_Other	T4	LIVING	TCGA-D8-A1XG-01	Iq	C3-BRCA/Luminal	cluster 2	BRCA non-CIMP c9	BRCA nonbasal-like c8	BRCA nonbasal-like c7	miRNA cluster 6	cluster 1	mutation c1uster 9	TCGA-D8-A1XG	TCGA Breast Cancer (BRCA)	breast invasive carcinoma	Breast					86	Right Upper Inner Quadrant	Axillary lymph node dissection alone
TCGA-D8-A1XJ-01	Stage IIIA	76	1	Stage IIIA	352		Positive	FEMALE	Positive				Negative	M0	Positive	N1	352	0	Her2		Positive				enrollment	T_Other	T3	LIVING	TCGA-D8-A1XJ-01	Squamous	C3-BRCA/Luminal	cluster 3	BRCA CIMP c7	BRCA basal-like c6	BRCA nonbasal-like c7	miRNA cluster 6	cluster 7	mutation cluster 5	TCGA-D8-A1XJ	TCGA Breast Cancer (BRCA)	breast invasive carcinoma	Breast					76	Left Upper Outer Quadrant|Left Lower Outer Quadrant	Axillary lymph node dissection alone
TCGA-D8-A1XK-01	Stage IB	55	1	Stage IIB	326		Negative	FEMALE	Negative				Negative	M0	Positive	N1	326	0	Basal		Negative				enrollment	T_Other	T2	LIVING	TCGA-D8-A1XK-01	High	C4-BRCA/Basal	cluster 5	BRCA basal-like c8	squamous c3	BRCA basal-like c8	miRNA cluster 14	cluster 5		TCGA-D8-A1XK	TCGA Breast Cancer (BRCA)	breast invasive carcinoma	Breast					55	Left Lower Inner Quadrant	Axillary lymph node dissection alone
TCGA-D8-A1XL-01	Stage IIB	34	1	Stage IIB	319		Positive	FEMALE	Negative				Negative	M0	Positive	N1	319	0	LumB		Positive				enrollment	T_Other	T2	LIVING	TCGA-D8-A1XL-01	High	C3-BRCA/Luminal	cluster 1	BRCA non-CIMP c9	BRCA nonbasal-like c8	BRCA nonbasal-like c7	miRNA c1uster 10	cluster 7	mutation cluster 3	TCGA-D8-A1XL	TCGA Breast Cancer (BRCA)	breast invasive carcinoma	Breast					34	Left Upper Outer Quadrant	Axillary lymph node dissection alone
TCGA-D8-A1XM-01	Stage IA	57	3	Stage I	218		Positive	FEMALE	Negative				Negative	M0	Negative	N0	218	0	LumA		Positive				enrollment	T1	T1	LIVING	TCGA-D8-A1XM-01	Kirc+	C3-BRCA/Luminal	cluster 1	BRCA non-CIMP c9	BRCA nonbasal-like c8	BRCA nonbasal-like c7	miRNA cluster 4	cluster 4	mutation cluster 4	TCGA-D8-A1XM	TCGA Breast Cancer (BRCA)	breast invasive carcinoma	Breast					57	Right Upper Inner Quadrant	Sentinel node biopsy alone
TCGA-D8-A1XO-01	Stage IIB	56	2	Stage IIB	242		Positive	FEMALE	Negative				Negative	M0	Positive	N1	242	0	LumA		Positive				enrollment	T_Other	T2	LIVING	TCGA-D8-A1XO-01	BRCA-LUAD+	C3-BRCA/Luminal	cluster 1	BRCA non-CIMP c9	BRCA nonbasal-like c8	BRCA nonbasal-like c7	miRNA cluster 13	cluster 7	mutation cluster 4	TCGA-D8-A1XO	TCGA Breast Cancer (BRCA)	breast invasive carcinoma	Breast					56	Left Lower Outer Quadrant	Axillary lymph node dissection alone
TCGA-D8-A1XQ-01	Stage IIA	69	1	Stage IIA	177		Negative	FEMALE	Negative				Negative	M0	Negative	N0	177	0	Basal		Negative				enrollment	T_Other	T2	LIVING	TCGA-D8-A1XQ-01	Squamous	C4-BRCA/Basal	cluster 5	BRCA basal-like c8	BRCA basal-like c6	BRCA basal-like c8	miRNA cluster 7	cluster 3		TCGA-D8-A1XQ	TCGA Breast Cancer (BRCA)	breast invasive carcinoma	Breast					69	Right Upper Outer Quadrant	Axillary lymph node dissection alone
TCGA-D8-A1XR-01	Stage IIB	56	2	Stage IIB	168		Positive	FEMALE	Negative				Negative	M0	Positive	N1	168	0	LumB		Positive				enrollment	T_Other	T2	LIVING	TCGA-D8-A1XR-01	Iq	C3-BRCA/Luminal	cluster 2	BRCA non-CIMP c9	BRCA nonbasal-like c8	BRCA nonbasal-like c7	miRNA cluster 7	cluster 3	mutation c1uster 9	TCGA-D8-A1XR	TCGA Breast Cancer (BRCA)	breast invasive carcinoma	Breast					56	Right Upper Outer Quadrant	Axillary lymph node dissection alone
TCGA-D8-A1XS-01	Stage IIIC	48	3	Stage IIIC	18		Positive	MALE	Positive				Negative	M0	Positive	N3	18	0	LumB		Positive				enrollment	T_Other	T2	LIVING	TCGA-D8-A1XS-01	High	C3-BRCA/Luminal	cluster 2	BRCA non-CIMP c9	BRCA nonbasal-like c8	BRCA nonbasal-like c7	miRNA cluster 4	cluster 4	mutation cluster 4	TCGA-D8-A1XS	TCGA Breast Cancer (BRCA)	breast invasive carcinoma	Breast					48	Left Upper Outer Quadrant	Axillary lymph node dissection alone
TCGA-D8-A1XT-01	Stage IIA	61	1	Stage IIA	193		Negative	FEMALE	Positive				Negative	M0	Positive	N1	193	0	Her2		Negative				enrollment	T1	T1	LIVING	TCGA-D8-A1XT-01	High	C3-BRCA/Luminal	cluster 4	BRCA CIMP c7	BRCA basal-like c6	BRCA nonbasal-like c7	miRNA cluster 4	cluster 4	mutation cluster 5	TCGA-D8-A1XT	TCGA Breast Cancer (BRCA)	breast invasive carcinoma	Breast					61	Right Upper Outer Quadrant	Axillary lymph node dissection alone
TCGA-D8-A1XU-01	Stage IA	56		Stage I	149		Positive	FEMALE	Negative				Negative	M0	Negative	N0	149	0	LumA		Positive				enrollment	T1	T1	LIVING	TCGA-D8-A1XU-01	High	C3-BRCA/Luminal	cluster 3	BRCA CIMP c7	BRCA nonbasal-like c8	BRCA nonbasal-like c7	miRNA cluster 13	cluster 6	mutation cluster 4	TCGA-D8-A1XU	TCGA Breast Cancer (BRCA)	breast invasive carcinoma	Breast					56	Left Upper Outer Quadrant	Sentinel node biopsy alone
TCGA-D8-A1XV-01	Stage IIA	84	3	Stage IIA	146		Positive	FEMALE	Negative				Negative	M0	Negative	N0	146	0	LumA		Positive				enrollment	T_Other	T2	LIVING	TCGA-D8-A1XV-01	Iq	C3-BRCA/Luminal	cluster 3	BRCA CIMP c7	BRCA nonbasal-like c8	BRCA nonbasal-like c7	miRNA cluster 14	cluster 7	mutation c1uster 9	TCGA-D8-A1XV	TCGA Breast Cancer (BRCA)	breast invasive carcinoma	Breast					84	Right Lower Inner Quadrant	Sentinel node biopsy alone
TCGA-D8-A1XW-01	Stage IIA	53	3	Stage IIA	117		Negative	FEMALE	Negative				Negative	M0	Negative	N0	117	0	Normal		Positive				enrollment	T_Other	T2	LIVING	TCGA-D8-A1XW-01	High	C4-BRCA/Basal	cluster 5	Low purity c2	BRCA basal-like c6	BRCA basal-like c8	miRNA cluster 7	cluster 3	mutation cluster 5	TCGA-D8-A1XW	TCGA Breast Cancer (BRCA)	breast invasive carcinoma	Breast					53	Left Upper Inner Quadrant	Sentinel lymph node biopsy plus axillary dissection
TCGA-D8-A1XY-01	Stage IIA	74		Stage IIA	81		Positive	FEMALE	Positive				Negative	M0	Negative	N0	81	0	LumA		Positive				enrollment	T_Other	T2	LIVING	TCGA-D8-A1XY-01	High	C3-BRCA/Luminal	cluster 2	BRCA non-CIMP c9	BRCA nonbasal-like c8	BRCA nonbasal-like c7	miRNA cluster 4	cluster 4	mutation cluster 4	TCGA-D8-A1XY	TCGA Breast Cancer (BRCA)	breast invasive carcinoma	Breast					74	Left Upper Outer Quadrant	Axillary lymph node dissection alone
TCGA-D8-A1XZ-01	Stage IIIA	81	1	Stage IIIA	120		Positive	FEMALE	Negative				Negative	M0	Positive	N2	120	0	LumB		Negative				enrollment	T1	T1	LIVING	TCGA-D8-A1XZ-01	BRCA-LUAD+	C3-BRCA/Luminal	cluster 4	BRCA non-CIMP c9	BRCA nonbasal-like c8	BRCA nonbasal-like c7	miRNA cluster 7	cluster 5	mutation cluster 13	TCGA-D8-A1XZ	TCGA Breast Cancer (BRCA)	breast invasive carcinoma	Breast					81	Right Lower Inner Quadrant	Axillary lymph node dissection alone
TCGA-D8-A1Y0-01	Stage IIIA	65	5	Stage IIIA	166		Positive	FEMALE	Negative				Negative	M0	Positive	N2	166	0	LumA		Positive				enrollment	T1	T1	LIVING	TCGA-D8-A1Y0-01	High	C3-BRCA/Luminal	cluster 4	BRCA non-CIMP c9	BRCA nonbasal-like c8	BRCA nonbasal-like c7	miRNA c1uster 10	cluster 7	mutation c1uster 9	TCGA-D8-A1Y0	TCGA Breast Cancer (BRCA)	breast invasive carcinoma	Breast					65	Left	Axillary lymph node dissection alone
TCGA-D8-A1Y1-01	Stage IIIA	80	2	Stage IIIA	115		Positive	FEMALE	Negative				Negative	M0	Positive	N1	115	0	LumB		Positive				enrollment	T_Other	T3	LIVING	TCGA-D8-A1Y1-01	BRCA-LUAD+	C3-BRCA/Luminal	cluster 4	BRCA non-CIMP c9	BRCA nonbasal-like c8	BRCA nonbasal-like c7	miRNA c1uster 10	cluster 7	mutation cluster 1	TCGA-D8-A1Y1	TCGA Breast Cancer (BRCA)	breast invasive carcinoma	Breast					80	Left Upper Inner Quadrant|Left Upper Outer Quadrant	Axillary lymph node dissection alone
TCGA-D8-A1Y2-01	Stage IIA	71	4	Stage IIA	72		Positive	FEMALE	Negative				Negative	M0	Negative	N0	72	0	LumB		Positive				enrollment	T_Other	T2	LIVING	TCGA-D8-A1Y2-01	Squamous	C3-BRCA/Luminal	cluster 1	BRCA non-CIMP c9	BRCA nonbasal-like c8	BRCA nonbasal-like c7	miRNA c1uster 9		mutation cluster 4	TCGA-D8-A1Y2	TCGA Breast Cancer (BRCA)	breast invasive carcinoma	Breast					71	Right Lower Outer Quadrant	Axillary lymph node dissection alone
TCGA-D8-A1Y3-01	Stage IIIA	61	4	Stage IIIA	124		Positive	FEMALE	Negative				Negative	M0	Positive	N2	124	0	LumB		Positive				enrollment	T_Other	T2	LIVING	TCGA-D8-A1Y3-01	Squamous	C3-BRCA/Luminal	cluster 3	BRCA CIMP c7	BRCA nonbasal-like c8	BRCA nonbasal-like c7	miRNA c1uster 10		mutation cluster 5	TCGA-D8-A1Y3	TCGA Breast Cancer (BRCA)	breast invasive carcinoma	Breast					61	Right Upper Outer Quadrant	Axillary lymph node dissection alone
TCGA-D8-A27E-01	Stage IA	66		Stage I	182		Positive	FEMALE	Negative				Negative	M0	Negative	N0	182	0	LumA		Positive				enrollment	T1	T1	LIVING	TCGA-D8-A27E-01	Quiet	C3-BRCA/Luminal	cluster 5	Low purity c2	BRCA nonbasal-like c8	BRCA nonbasal-like c7	miRNA cluster 14		mutation c1uster 9	TCGA-D8-A27E	TCGA Breast Cancer (BRCA)	breast invasive carcinoma	Breast					66	Left Upper Inner Quadrant	Sentinel node biopsy alone
TCGA-D8-A27F-01	Stage IIA	40	1	Stage IIA	227		Negative	FEMALE	Negative				Negative	M0	Negative	N0	227	0	Basal		Negative				enrollment	T_Other	T2	LIVING	TCGA-D8-A27F-01	BRCA-LUAD+	C1-LUAD-enriched	cluster 5	BRCA basal-like c8	squamous c3	BRCA basal-like c8	miRNA cluster 12		mutation cluster 12	TCGA-D8-A27F	TCGA Breast Cancer (BRCA)	breast invasive carcinoma	Breast					40	Right Upper Outer Quadrant	Axillary lymph node dissection alone
TCGA-D8-A27G-01	Stage IIA	75	2	Stage IIA	209		Positive	FEMALE	Negative				Negative	M0	Negative	N0	209	0	LumA		Positive				enrollment	T_Other	T2	LIVING	TCGA-D8-A27G-01	Iq	C3-BRCA/Luminal	cluster 3	BRCA CIMP c7	BRCA nonbasal-like c8	BRCA nonbasal-like c7	miRNA cluster 4			TCGA-D8-A27G	TCGA Breast Cancer (BRCA)	breast invasive carcinoma	Breast					75	Left Lower Outer Quadrant	Axillary lymph node dissection alone
TCGA-D8-A27H-01	Stage IIA	72	1	Stage IIA	140		Negative	FEMALE	Negative				Negative	M0	Negative	N0	140	0	Basal		Negative				enrollment	T_Other	T2	LIVING	TCGA-D8-A27H-01	High	C4-BRCA/Basal	cluster 5	BRCA basal-like c8	BRCA basal-like c6	BRCA basal-like c8	miRNA cluster 3		mutation cluster 2	TCGA-D8-A27H	TCGA Breast Cancer (BRCA)	breast invasive carcinoma	Breast					72	Right Upper Outer Quadrant	No axillary staging
TCGA-D8-A27I-01	Stage IIIA	58	3	Stage IIIA	185		Positive	FEMALE	Negative				Negative	M0	Positive	N2	185	0	LumA		Positive				enrollment	T1	T1	LIVING	TCGA-D8-A27I-01	BRCA-LUAD+	C3-BRCA/Luminal	cluster 1	BRCA non-CIMP c9	BRCA nonbasal-like c8	BRCA nonbasal-like c7	miRNA cluster 5		mutation c1uster 9	TCGA-D8-A27I	TCGA Breast Cancer (BRCA)	breast invasive carcinoma	Breast					58	Right Upper Outer Quadrant	Axillary lymph node dissection alone
TCGA-D8-A27K-01	Stage IIB	47	2	Stage IIB	118		Positive	FEMALE	Negative				Negative	M0	Positive	N1	118	0	LumA		Positive				enrollment	T_Other	T2	LIVING	TCGA-D8-A27K-01	Iq	C3-BRCA/Luminal	cluster 1	BRCA non-CIMP c9	BRCA nonbasal-like c8	BRCA nonbasal-like c7	miRNA cluster 3		mutation cluster 4	TCGA-D8-A27K	TCGA Breast Cancer (BRCA)	breast invasive carcinoma	Breast					47	Left Upper Inner Quadrant	Axillary lymph node dissection alone
TCGA-D8-A27L-01	Stage IIB	49	4	Stage IIIA	125		Positive	FEMALE	Negative				Negative	M0	Positive	N2	125	0	LumA		Positive				enrollment	T1	T1	LIVING	TCGA-D8-A27L-01	Kirc+	C3-BRCA/Luminal	cluster 1	BRCA non-CIMP c9	BRCA nonbasal-like c8	BRCA nonbasal-like c7	miRNA cluster 5		mutation cluster 14	TCGA-D8-A27L	TCGA Breast Cancer (BRCA)	breast invasive carcinoma	Breast					49	Right Upper Inner Quadrant	Sentinel lymph node biopsy plus axillary dissection
TCGA-D8-A27M-01	Stage IIA	59	1	Stage I	144		Negative	FEMALE	Negative				Negative	M0	Negative	N0	144	0	Basal		Negative				enrollment	T1	T1	LIVING	TCGA-D8-A27M-01	High	C4-BRCA/Basal	cluster 5	BRCA basal-like c8	BRCA basal-like c6	BRCA basal-like c8	miRNA cluster 5		mutation cluster 5	TCGA-D8-A27M	TCGA Breast Cancer (BRCA)	breast invasive carcinoma	Breast					59	Left Upper Outer Quadrant	Sentinel node biopsy alone
TCGA-D8-A27N-01	Stage IIIA	36	5	Stage IIIA	145		Positive	FEMALE	Positive				Negative	M0	Positive	N2	145	0	LumB		Positive				enrollment	T_Other	T2	LIVING	TCGA-D8-A27N-01	High	C3-BRCA/Luminal	cluster 4	BRCA CIMP c7	BRCA basal-like c6	BRCA nonbasal-like c7	miRNA cluster 4		mutation cluster 5	TCGA-D8-A27N	TCGA Breast Cancer (BRCA)	breast invasive carcinoma	Breast					36	Right Upper Outer Quadrant	Axillary lymph node dissection alone
TCGA-D8-A27P-01	Stage IIA	64	2	Stage I	22		Positive	FEMALE	Negative				Negative	M0	Negative	N0	22	0	LumA		Positive				enrollment	T1	T1	LIVING	TCGA-D8-A27P-01	Iq	C3-BRCA/Luminal	cluster 2	BRCA non-CIMP c9	BRCA nonbasal-like c8	BRCA nonbasal-like c7	miRNA cluster 3		mutation cluster 4	TCGA-D8-A27P	TCGA Breast Cancer (BRCA)	breast invasive carcinoma	Breast					64	Right Upper Inner Quadrant	Sentinel node biopsy alone
TCGA-D8-A27R-01	Stage IIIC	41	5	Stage IIIC	90		Positive	FEMALE	Negative				Negative	M0	Positive	N3	90	0	LumB		Positive				enrollment	T_Other	T2	LIVING	TCGA-D8-A27R-01	High	C3-BRCA/Luminal	cluster 1	BRCA non-CIMP c9	BRCA nonbasal-like c8	BRCA nonbasal-like c7	miRNA cluster 5		mutation c1uster 9	TCGA-D8-A27R	TCGA Breast Cancer (BRCA)	breast invasive carcinoma	Breast					41	Right Upper Outer Quadrant	Axillary lymph node dissection alone
TCGA-D8-A27T-01	Stage IIIC	53	2	Stage IIIC	135		Positive	FEMALE	Negative				Negative	M0	Positive	N3	135	0	LumA		Positive				enrollment	T_Other	T2	LIVING	TCGA-D8-A27T-01	Iq	C3-BRCA/Luminal	cluster 4	BRCA non-CIMP c9	BRCA nonbasal-like c8	BRCA nonbasal-like c7	miRNA cluster 12		mutation cluster 4	TCGA-D8-A27T	TCGA Breast Cancer (BRCA)	breast invasive carcinoma	Breast					53	Right Upper Outer Quadrant|Right Lower Outer Quadrant	Sentinel lymph node biopsy plus axillary dissection
TCGA-D8-A27V-01	Stage IIA	62	2	Stage IIA	73		Positive	FEMALE	Negative				Negative	M0	Negative	N0	73	0	LumA		Positive				enrollment	T_Other	T2	LIVING	TCGA-D8-A27V-01	BRCA-LUAD+	C3-BRCA/Luminal	cluster 4	BRCA non-CIMP c9	BRCA nonbasal-like c8	BRCA nonbasal-like c7	miRNA c1uster 10			TCGA-D8-A27V	TCGA Breast Cancer (BRCA)	breast invasive carcinoma	Breast					62	Right Upper Outer Quadrant|Right Lower Outer Quadrant	Sentinel node biopsy alone
TCGA-D8-A27W-01	Stage IIIB	55	3	Stage IIIB	15		Positive	FEMALE	Positive				Negative	M0	Negative	N0	15	0	LumB		Positive				enrollment	T_Other	T4	LIVING	TCGA-D8-A27W-01	High	C3-BRCA/Luminal	cluster 4	BRCA CIMP c7	BRCA nonbasal-like c8	BRCA nonbasal-like c7	miRNA cluster 5		mutation c1uster 9	TCGA-D8-A27W	TCGA Breast Cancer (BRCA)	breast invasive carcinoma	Breast					55	Right	Axillary lymph node dissection alone
TCGA-D8-A3Z5-01																													TCGA-D8-A3Z5-01										TCGA-D8-A3Z5	TCGA Breast Cancer (BRCA)	breast invasive carcinoma	Breast					54	Right	Other (specify)
TCGA-D8-A3Z6-01																													TCGA-D8-A3Z6-01										TCGA-D8-A3Z6	TCGA Breast Cancer (BRCA)	breast invasive carcinoma	Breast					56	Left	Other (specify)
TCGA-D8-A4Z1-01																													TCGA-D8-A4Z1-01										TCGA-D8-A4Z1	TCGA Breast Cancer (BRCA)	breast invasive carcinoma	Breast					68	Right|Right Upper Inner Quadrant	No axillary staging
TCGA-D8-A73U-01																													TCGA-D8-A73U-01										TCGA-D8-A73U	TCGA Breast Cancer (BRCA)	breast invasive carcinoma	Breast					88	Left Upper Outer Quadrant	Sentinel lymph node biopsy plus axillary dissection
TCGA-D8-A73W-01																													TCGA-D8-A73W-01										TCGA-D8-A73W	TCGA Breast Cancer (BRCA)	breast invasive carcinoma	Breast	NO	YES			79	Right Upper Outer Quadrant	Axillary lymph node dissection alone
TCGA-D8-A73X-01																													TCGA-D8-A73X-01										TCGA-D8-A73X	TCGA Breast Cancer (BRCA)	breast invasive carcinoma	Breast					53	Left Upper Outer Quadrant	Sentinel node biopsy alone
TCGA-E2-A105-01	Stage IIA	79	5	Stage IIA	1163		Positive	FEMALE	Equivocal				Negative	M0	Negative	N0	1163	0	LumA	Luminal A	Positive		-10	-3	enrollment	T_Other	T2	LIVING	TCGA-E2-A105-01	Kirc+	C3-BRCA/Luminal	cluster 3	BRCA CIMP c7		BRCA nonbasal-like c7	miRNA cluster 6	cluster 1	mutation cluster 4	TCGA-E2-A105	TCGA Breast Cancer (BRCA)	breast invasive carcinoma	Breast					79	Left Upper Inner Quadrant	Sentinel node biopsy alone
TCGA-E2-A106-01	Stage IB	34	4	No_Conversion	1807		Positive	FEMALE	Negative				Negative	M0	Positive	N1	1807	0	LumA	Luminal A	Positive		0	-3	followup	T1	T1	LIVING	TCGA-E2-A106-01	Kirc+		cluster 4	BRCA non-CIMP c9		BRCA nonbasal-like c7	miRNA cluster 4	cluster 4		TCGA-E2-A106	TCGA Breast Cancer (BRCA)	breast invasive carcinoma	Breast					34	Right Upper Outer Quadrant	Sentinel lymph node biopsy plus axillary dissection
TCGA-E2-A107-01	Stage IIIA	54	2	No_Conversion	1046		Positive	FEMALE	Negative	1	3	4	Negative	M0	Positive	N2	1046	0		Luminal B	Negative	LumA/B	0	-3	followup	T_Other	T3	LIVING	TCGA-E2-A107-01	High	C3-BRCA/Luminal	cluster 4	BRCA CIMP c7	BRCA nonbasal-like c8		miRNA cluster 4	cluster 4	mutation cluster 4	TCGA-E2-A107	TCGA Breast Cancer (BRCA)	breast invasive carcinoma	Breast					54	Right Upper Inner Quadrant	Sentinel lymph node biopsy plus axillary dissection
TCGA-E2-A108-01	Stage IIIA	64	4	No_Conversion	837		Positive	FEMALE	Negative	1	4	3	Negative	M0	Positive	N2	837	0	Normal	Normal-like	Positive	ReacI	-5	-8	followup	T_Other	T2	LIVING	TCGA-E2-A108-01	High	C3-BRCA/Luminal	cluster 1	BRCA non-CIMP c9	KIRC-like c1	BRCA nonbasal-like c7	miRNA cluster 4	cluster 4	mutation cluster 5	TCGA-E2-A108	TCGA Breast Cancer (BRCA)	breast invasive carcinoma	Breast					64	Right Upper Outer Quadrant
TCGA-E2-A109-01	Stage IIA	64	5	Stage IIA	1417		Positive	FEMALE	Negative	4	1	4	Negative	M0	Negative	N0	1417	0	LumB	Luminal B	Negative	LumA/B	-10	-5	followup	T_Other	T2	LIVING	TCGA-E2-A109-01	BRCA-LUAD+	C3-BRCA/Luminal	cluster 3	BRCA CIMP c7	BRCA nonbasal-like c8	BRCA nonbasal-like c7	miRNA cluster 6	cluster 6	mutation cluster 5	TCGA-E2-A109	TCGA Breast Cancer (BRCA)	breast invasive carcinoma	Breast					64	Right Upper Outer Quadrant	Sentinel node biopsy alone
TCGA-E2-A10A-01	Stage IIB	41	2	Stage IIB	1229		Positive	FEMALE	Negative	3	3	4	Negative	M0	Negative	N0	1229	0	LumA	Luminal B	Positive	LumA/B	0	-3	followup	T_Other	T3	LIVING	TCGA-E2-A10A-01	BRCA-LUAD+	C3-BRCA/Luminal	cluster 2	BRCA non-CIMP c9	BRCA nonbasal-like c8	BRCA nonbasal-like c7	miRNA cluster 6	cluster 1	mutation c1uster 9	TCGA-E2-A10A	TCGA Breast Cancer (BRCA)	breast invasive carcinoma	Breast	YES	YES	NO		41	Left Upper Outer Quadrant	Sentinel node biopsy alone
TCGA-E2-A10B-01	Stage IIB	67	3	No_Conversion	1141		Positive	FEMALE	Negative	1	3	3	Negative	M0	Positive	N1	1141	0	LumA	Luminal A	Positive	LumA	-12	-3	followup	T_Other	T2	LIVING	TCGA-E2-A10B-01	High	C3-BRCA/Luminal	cluster 4	BRCA CIMP c7	BRCA nonbasal-like c8	BRCA nonbasal-like c7	miRNA cluster 4	cluster 4	mutation cluster 4	TCGA-E2-A10B	TCGA Breast Cancer (BRCA)	breast invasive carcinoma	Breast	YES	YES	YES		67	Left Lower Outer Quadrant	Sentinel lymph node biopsy plus axillary dissection
TCGA-E2-A10C-01	Stage IIB	54	3	No_Conversion	1219		Positive	FEMALE	Negative	1	1	4	Negative	M0	Positive	N1	1219	0	LumB	Luminal B	Positive	ReacI	-2	-5	followup	T_Other	T2	LIVING	TCGA-E2-A10C-01	High	C3-BRCA/Luminal	cluster 4	BRCA CIMP c7	BRCA nonbasal-like c8	BRCA nonbasal-like c7	miRNA c1uster 10	cluster 7	mutation cluster 3	TCGA-E2-A10C	TCGA Breast Cancer (BRCA)	breast invasive carcinoma	Breast					54	Left Upper Outer Quadrant	Sentinel lymph node biopsy plus axillary dissection
TCGA-E2-A10E-01	Stage IIA	64	2	No_Conversion	865		Positive	FEMALE	Negative	1	3	3	Negative	M0	Positive	N1	865	0	LumA	Luminal A	Positive	LumA/B	-12	-3	followup	T1	T1	LIVING	TCGA-E2-A10E-01	Iq	C3-BRCA/Luminal	cluster 4	BRCA CIMP c7	BRCA nonbasal-like c8	BRCA nonbasal-like c7	miRNA cluster 4	cluster 4	mutation c1uster 9	TCGA-E2-A10E	TCGA Breast Cancer (BRCA)	breast invasive carcinoma	Breast					64	Left	Sentinel lymph node biopsy plus axillary dissection
TCGA-E2-A10F-01	Stage IIA	47	2	Stage IIA	878		Positive	FEMALE	Negative				Negative	M0	Negative	N0	878	0	LumA	Luminal A	Positive		-5	-4	followup	T_Other	T2	LIVING	TCGA-E2-A10F-01	Iq	C3-BRCA/Luminal	cluster 4	BRCA CIMP c7		BRCA nonbasal-like c7	miRNA cluster 4	cluster 4	mutation cluster 4	TCGA-E2-A10F	TCGA Breast Cancer (BRCA)	breast invasive carcinoma	Breast					47	Left Upper Outer Quadrant	Sentinel node biopsy alone
TCGA-E2-A14N-01	Stage IIB	37	4	Stage IIB	1350		Negative	FEMALE	Negative				Negative	M0	Positive	N1	1350	0	Basal	Basal-like	Negative		-13	-12	enrollment	T_Other	T2	LIVING	TCGA-E2-A14N-01	High	C4-BRCA/Basal	cluster 5	BRCA basal-like c8	BRCA basal-like c6	BRCA basal-like c8	miRNA cluster 5	cluster 6	mutation cluster 5	TCGA-E2-A14N	TCGA Breast Cancer (BRCA)	breast invasive carcinoma	Breast					37	Right Upper Inner Quadrant	Sentinel lymph node biopsy plus axillary dissection
TCGA-E2-A14O-01	Stage IIIA	76	2	Stage IIIA	1172		Positive	FEMALE	Negative	1	3	4	Negative	M0	Positive	N1	1172	0	LumB	Luminal B	Positive	LumA/B	0	-3	enrollment	T_Other	T3	LIVING	TCGA-E2-A14O-01	BRCA-LUAD+	C3-BRCA/Luminal	cluster 4	BRCA CIMP c7	BRCA nonbasal-like c8	BRCA nonbasal-like c7	miRNA cluster 4	cluster 4	mutation c1uster 9	TCGA-E2-A14O	TCGA Breast Cancer (BRCA)	breast invasive carcinoma	Breast					76	Left Upper Outer Quadrant	Sentinel lymph node biopsy plus axillary dissection
TCGA-E2-A14P-01	Stage IIIC	79	3	Stage IIIC	487		Negative	FEMALE	Positive	1	1	1	Negative	M0	Positive	N3	487	0	Her2	HER2-enriched	Negative	Her2	-11	-5	enrollment	T_Other	T2	LIVING	TCGA-E2-A14P-01	High	C3-BRCA/Luminal	cluster 1	BRCA non-CIMP c9	BRCA basal-like c6	BRCA nonbasal-like c7	miRNA cluster 4	cluster 4	mutation cluster 5	TCGA-E2-A14P	TCGA Breast Cancer (BRCA)	breast invasive carcinoma	Breast					79	Right Upper Outer Quadrant	Axillary lymph node dissection alone
TCGA-E2-A14Q-01	Stage IIA	50	2	Stage IIB	974		Positive	FEMALE	Negative	3	4	3	Negative	M0	Positive	N1	974	0	LumA	Luminal A	Positive	LumA	0	-7	enrollment	T_Other	T2	LIVING	TCGA-E2-A14Q-01	Iq	C3-BRCA/Luminal	cluster 2	BRCA non-CIMP c9	BRCA nonbasal-like c8	BRCA nonbasal-like c7	miRNA cluster 14	cluster 2	mutation cluster 4	TCGA-E2-A14Q	TCGA Breast Cancer (BRCA)	breast invasive carcinoma	Breast					50	Left Upper Outer Quadrant	Sentinel lymph node biopsy plus axillary dissection
TCGA-E2-A14R-01	Stage IIA	62	1	Stage IIA	845		Negative	FEMALE	Negative				Negative	M0	Negative	N0	845	0	Basal	Basal-like	Negative		-13	-12	enrollment	T_Other	T2	LIVING	TCGA-E2-A14R-01	High	C4-BRCA/Basal	cluster 5	BRCA basal-like c8		BRCA basal-like c8	miRNA cluster 12	cluster 5	mutation cluster 5	TCGA-E2-A14R	TCGA Breast Cancer (BRCA)	breast invasive carcinoma	Breast	NO	YES	YES		62	Left	Sentinel lymph node biopsy plus axillary dissection
TCGA-E2-A14S-01	Stage I	65	4	Stage I	834		Positive	FEMALE	Negative	1	3	4	Negative	M0	Negative	N0	834	0	LumB	Luminal B	Positive	LumA/B	-10	-3	enrollment	T1	T1	LIVING	TCGA-E2-A14S-01	Squamous	C3-BRCA/Luminal	cluster 4	BRCA CIMP c7	BRCA nonbasal-like c8	BRCA nonbasal-like c7	miRNA cluster 14	cluster 2	mutation cluster 4	TCGA-E2-A14S	TCGA Breast Cancer (BRCA)	breast invasive carcinoma	Breast					65	Left Lower Outer Quadrant	Sentinel node biopsy alone
TCGA-E2-A14T-01	Stage IIA	52		Stage IIA	890		Positive	FEMALE	Negative				Negative	M0	Negative	N0	890	0	LumA	Luminal A	Positive	LumA/B	0	-3	enrollment	T_Other	T2	LIVING	TCGA-E2-A14T-01		C3-BRCA/Luminal	cluster 2	BRCA non-CIMP c9	BRCA nonbasal-like c8	BRCA nonbasal-like c7	miRNA cluster 6	cluster 1	mutation c1uster 9	TCGA-E2-A14T	TCGA Breast Cancer (BRCA)	breast invasive carcinoma	Breast					52	Left Upper Inner Quadrant	Sentinel node biopsy alone
TCGA-E2-A14U-01																													TCGA-E2-A14U-01	Quiet			BRCA non-CIMP c9			miRNA cluster 5			TCGA-E2-A14U	TCGA Breast Cancer (BRCA)	breast invasive carcinoma	Breast					74	Right Upper Outer Quadrant	Other (specify)
TCGA-E2-A14V-01	Stage IIB	53	5	Stage IIB	748		Positive	FEMALE	Positive	1	1	1	Negative	M0	Positive	N1	748	0	Her2	HER2-enriched	Positive	Her2	-1	-5	enrollment	T_Other	T2	LIVING	TCGA-E2-A14V-01	High	C3-BRCA/Luminal	cluster 4	BRCA CIMP c7	BRCA basal-like c6	BRCA nonbasal-like c7	miRNA cluster 4	cluster 4	mutation cluster 4	TCGA-E2-A14V	TCGA Breast Cancer (BRCA)	breast invasive carcinoma	Breast					53	Left Lower Inner Quadrant	Sentinel lymph node biopsy plus axillary dissection
TCGA-E2-A14W-01	Stage IIA	78	5	Stage IIA	833		Positive	FEMALE	Positive	3	3	4	Negative	M0	Negative	N0	833	0	LumB	Luminal B	Positive	Her2	0	-3	enrollment	T_Other	T2	LIVING	TCGA-E2-A14W-01	High	C3-BRCA/Luminal	cluster 2	BRCA non-CIMP c9	BRCA nonbasal-like c8	BRCA nonbasal-like c7	miRNA cluster 6	cluster 7	mutation cluster 12	TCGA-E2-A14W	TCGA Breast Cancer (BRCA)	breast invasive carcinoma	Breast					78	Left Upper Outer Quadrant	Sentinel node biopsy alone
TCGA-E2-A14X-01	Stage IIIA	55	4	Stage IIIA	692		Negative	FEMALE	Negative	3	2	2	Negative	M0	Positive	N2	692	0	Basal	Basal-like	Negative	ReacII	-13	-12	enrollment	T_Other	T2	LIVING	TCGA-E2-A14X-01	BRCA-LUAD+	C4-BRCA/Basal	cluster 5	BRCA basal-like c8	KIRC-like c1	BRCA basal-like c8	miRNA cluster 7	cluster 3	mutation cluster 5	TCGA-E2-A14X	TCGA Breast Cancer (BRCA)	breast invasive carcinoma	Breast					55	Right Upper Outer Quadrant	Sentinel lymph node biopsy plus axillary dissection
TCGA-E2-A14Y-01	Stage IIA	35	2	Stage IIA	688		Positive	FEMALE	Positive	3	3	3	Negative	M0	Negative	N0	688	0	Basal	Basal-like	Positive	ReacII	-13	0	enrollment	T_Other	T2	LIVING	TCGA-E2-A14Y-01	Iq	C4-BRCA/Basal	cluster 2	BRCA non-CIMP c9	BRCA basal-like c6	BRCA basal-like c8	miRNA cluster 11	cluster 5	mutation cluster 3	TCGA-E2-A14Y	TCGA Breast Cancer (BRCA)	breast invasive carcinoma	Breast					35	Right	Sentinel node biopsy alone
TCGA-E2-A14Y-11		35			688			FEMALE									688	0							enrollment			LIVING	TCGA-E2-A14Y-11		C4-BRCA/Basal							mutation cluster 3	TCGA-E2-A14Y	TCGA Breast Cancer (BRCA)	breast invasive carcinoma	Breast					35	Right	Sentinel node biopsy alone
TCGA-E2-A14Z-01	Stage I	64	1	Stage I	518		Positive	FEMALE	Negative	3	2	3	Negative	M0	Negative	N0	518	0	LumA	Luminal A	Positive	LumA	0	-2	enrollment	T1	T1	LIVING	TCGA-E2-A14Z-01	BRCA-LUAD+	C3-BRCA/Luminal	cluster 1	BRCA non-CIMP c9	BRCA nonbasal-like c8	BRCA nonbasal-like c7	miRNA cluster 13	cluster 6	mutation cluster 5	TCGA-E2-A14Z	TCGA Breast Cancer (BRCA)	breast invasive carcinoma	Breast			NO		64	Left Upper Outer Quadrant	Sentinel node biopsy alone
TCGA-E2-A150-01	Stage IIA	48	1	Stage IIA	591		Negative	FEMALE	Negative	2	2	2	Negative	M0	Negative	N0	591	0	Basal	Basal-like	Negative	X	-13	-12	enrollment	T_Other	T2	LIVING	TCGA-E2-A150-01	High	C4-BRCA/Basal	cluster 5	BRCA basal-like c8	squamous c3	BRCA basal-like c8	miRNA cluster 7	cluster 3	mutation cluster 5	TCGA-E2-A150	TCGA Breast Cancer (BRCA)	breast invasive carcinoma	Breast					48	Left Upper Outer Quadrant	Sentinel node biopsy alone
TCGA-E2-A152-01	Stage I	56	1	Stage I	588		Positive	FEMALE	Positive	2	2	1	Negative	M0	Negative	N0	588	0	Her2	HER2-enriched	Negative	Her2	-1	-5	enrollment	T1	T1	LIVING	TCGA-E2-A152-01	High	C3-BRCA/Luminal	cluster 1	Cluster 5	BRCA basal-like c6	BRCA nonbasal-like c7	miRNA cluster 12	cluster 5	mutation cluster 8	TCGA-E2-A152	TCGA Breast Cancer (BRCA)	breast invasive carcinoma	Breast	NO	NO	NO		56	Right Upper Inner Quadrant	Sentinel node biopsy alone
TCGA-E2-A153-01	Stage IIB	51	2	Stage IIA	586		Positive	FEMALE	Negative	3	3	3	Negative	M0	Positive	N1	586	0	LumA	Luminal A	Positive	LumA	-12	-3	enrollment	T1	T1	LIVING	TCGA-E2-A153-01	Iq	C3-BRCA/Luminal	cluster 1	BRCA non-CIMP c9	BRCA nonbasal-like c8	BRCA nonbasal-like c7	miRNA cluster 4	cluster 4	mutation cluster 4	TCGA-E2-A153	TCGA Breast Cancer (BRCA)	breast invasive carcinoma	Breast					51	Left	Sentinel lymph node biopsy plus axillary dissection
TCGA-E2-A153-11		51			586			FEMALE									586	0	Normal						enrollment			LIVING	TCGA-E2-A153-11		C3-BRCA/Luminal							mutation cluster 4	TCGA-E2-A153	TCGA Breast Cancer (BRCA)	breast invasive carcinoma	Breast					51	Left	Sentinel lymph node biopsy plus axillary dissection
TCGA-E2-A154-01	Stage I	68	2	Stage I	325		Positive	FEMALE	Negative	3	3	3	Negative	M0	Negative	N0	325	0	LumA	Luminal A	Positive	LumA	-12	-3	enrollment	T1	T1	LIVING	TCGA-E2-A154-01	BRCA-LUAD+	C3-BRCA/Luminal	cluster 4	BRCA CIMP c7	BRCA nonbasal-like c8	BRCA nonbasal-like c7	miRNA cluster 13	cluster 6	mutation cluster 4	TCGA-E2-A154	TCGA Breast Cancer (BRCA)	breast invasive carcinoma	Breast					68	Left Upper Outer Quadrant	Sentinel node biopsy alone
TCGA-E2-A155-01	Stage IIB	58	1	Stage IIB	553		Positive	FEMALE	Negative	4	3	4	Negative	M0	Positive	N1	553	0	LumB	Luminal B	Negative	LumA/B	-10	-3	enrollment	T_Other	T2	LIVING	TCGA-E2-A155-01	Kirc+	C3-BRCA/Luminal	cluster 3	BRCA CIMP c7	BRCA nonbasal-like c8	BRCA nonbasal-like c7	miRNA cluster 4	cluster 5	mutation cluster 5	TCGA-E2-A155	TCGA Breast Cancer (BRCA)	breast invasive carcinoma	Breast					58	Left Upper Inner Quadrant|Left Lower Inner Quadrant	Axillary lymph node dissection alone
TCGA-E2-A156-01	Stage I	61	2	Stage I	481		Positive	FEMALE	Negative	3	3	3	Negative	M0	Negative	N0	481	0	LumA	Luminal A	Positive	LumA	-12	-3	enrollment	T1	T1	LIVING	TCGA-E2-A156-01	Kirc+	C3-BRCA/Luminal	cluster 2	BRCA non-CIMP c9	BRCA nonbasal-like c8	BRCA nonbasal-like c7	miRNA cluster 14	cluster 2	mutation cluster 4	TCGA-E2-A156	TCGA Breast Cancer (BRCA)	breast invasive carcinoma	Breast					61	Left	Sentinel node biopsy alone
TCGA-E2-A158-01	Stage IIA	43	1	Stage IIA	450		Negative	FEMALE	Negative	2	2	2	Negative	M0	Positive	N1	450	0	Basal	Basal-like	Negative	Basal	-13	0	enrollment	T1	T1	LIVING	TCGA-E2-A158-01	High	C4-BRCA/Basal	cluster 5	BRCA basal-like c8	BRCA basal-like c6	BRCA basal-like c8	miRNA cluster 12	cluster 5	mutation cluster 5	TCGA-E2-A158	TCGA Breast Cancer (BRCA)	breast invasive carcinoma	Breast					43	Left Upper Inner Quadrant|Left Upper Outer Quadrant	Sentinel node biopsy alone
TCGA-E2-A158-11		43			450			FEMALE									450	0	Normal						enrollment			LIVING	TCGA-E2-A158-11		C4-BRCA/Basal							mutation cluster 5	TCGA-E2-A158	TCGA Breast Cancer (BRCA)	breast invasive carcinoma	Breast					43	Left Upper Inner Quadrant|Left Upper Outer Quadrant	Sentinel node biopsy alone
TCGA-E2-A159-01	Stage IIA	50	1	Stage IIA	515		Negative	FEMALE	Negative	2	2	2	Negative	M0	Negative	N0	515	0	Basal	Basal-like	Negative	Basal	-13	-10	enrollment	T_Other	T2	LIVING	TCGA-E2-A159-01	High	C4-BRCA/Basal	cluster 5	Cluster 5	BRCA basal-like c6	BRCA basal-like c8	miRNA cluster 7	cluster 3	mutation cluster 5	TCGA-E2-A159	TCGA Breast Cancer (BRCA)	breast invasive carcinoma	Breast					50	Left Lower Outer Quadrant	Sentinel node biopsy alone
TCGA-E2-A15A-01	Stage IIIC	45	4	Stage IIIC	502		Positive	FEMALE	Negative	1	1	4	Negative	M0	Positive	N3	502	0	LumB	Luminal B	Positive	Her2	-2	-5	enrollment	T_Other	T2	LIVING	TCGA-E2-A15A-01	High	C3-BRCA/Luminal	cluster 4	BRCA CIMP c7	BRCA nonbasal-like c8	BRCA nonbasal-like c7	miRNA cluster 4	cluster 4	mutation c1uster 9	TCGA-E2-A15A	TCGA Breast Cancer (BRCA)	breast invasive carcinoma	Breast					45	Left	Sentinel lymph node biopsy plus axillary dissection
TCGA-E2-A15A-06		45			502			FEMALE									502	0	LumB						enrollment			LIVING	TCGA-E2-A15A-06		C3-BRCA/Luminal	cluster 4	BRCA CIMP c7		BRCA nonbasal-like c7	miRNA cluster 4	cluster 4	mutation c1uster 9	TCGA-E2-A15A	TCGA Breast Cancer (BRCA)	breast invasive carcinoma	Breast					45	Left	Sentinel lymph node biopsy plus axillary dissection
TCGA-E2-A15C-01	Stage I	61	4	Stage I	496		Positive	FEMALE	Negative	3	3	3	Negative	M0	Negative	N0	496	0	LumA	Luminal A	Positive	ReacI	-5	-4	enrollment	T1	T1	LIVING	TCGA-E2-A15C-01	Kirc+	C3-BRCA/Luminal	cluster 2	BRCA non-CIMP c9	BRCA nonbasal-like c8	BRCA nonbasal-like c7	miRNA cluster 14	cluster 2	mutation cluster 4	TCGA-E2-A15C	TCGA Breast Cancer (BRCA)	breast invasive carcinoma	Breast					61	Right Lower Outer Quadrant	Sentinel node biopsy alone
TCGA-E2-A15D-01	Stage IIA	47		Stage IIA	315		Positive	FEMALE	Negative				Negative	M0	Negative	N0	315	0	LumA	Luminal A	Positive	LumA	-5	-3	enrollment	T_Other	T2	LIVING	TCGA-E2-A15D-01		C3-BRCA/Luminal	cluster 1	BRCA non-CIMP c9	BRCA nonbasal-like c8	BRCA nonbasal-like c7	miRNA cluster 4	cluster 4	mutation c1uster 9	TCGA-E2-A15D	TCGA Breast Cancer (BRCA)	breast invasive carcinoma	Breast					47	Right	Sentinel node biopsy alone
TCGA-E2-A15E-01	Stage IIA	40	4	Stage IIA	517		Positive	FEMALE	Positive	3	4	3	Negative	M0	Positive	N1	517	0	LumA	Luminal A	Positive	Her2	-5	-7	enrollment	T1	T1	LIVING	TCGA-E2-A15E-01	Squamous	C3-BRCA/Luminal	cluster 2	Low purity c2	BRCA nonbasal-like c8	BRCA nonbasal-like c7	miRNA cluster 13	cluster 6	mutation cluster 3	TCGA-E2-A15E	TCGA Breast Cancer (BRCA)	breast invasive carcinoma	Breast					40	Left	Sentinel lymph node biopsy plus axillary dissection
TCGA-E2-A15E-06		40			517			FEMALE									517	0	LumA						enrollment			LIVING	TCGA-E2-A15E-06		C3-BRCA/Luminal	cluster 2	Low purity c2		BRCA nonbasal-like c7	miRNA cluster 13	cluster 6	mutation cluster 3	TCGA-E2-A15E	TCGA Breast Cancer (BRCA)	breast invasive carcinoma	Breast					40	Left	Sentinel lymph node biopsy plus axillary dissection
TCGA-E2-A15F-01	Stage I	64		Stage IIA	468		Positive	FEMALE	Negative				Negative	M0	Negative	N0	468	0		Luminal A	Positive	ReacI	-3	-3	enrollment	T_Other	T2	LIVING	TCGA-E2-A15F-01			cluster 2	BRCA non-CIMP c9	BRCA nonbasal-like c8		miRNA cluster 4	cluster 4	mutation c1uster 9	TCGA-E2-A15F	TCGA Breast Cancer (BRCA)	breast invasive carcinoma	Breast					64	Left Upper Outer Quadrant	Sentinel node biopsy alone
TCGA-E2-A15G-01	Stage IIA	76	2	Stage IIA	315		Positive	FEMALE	Negative	3	3	3	Negative	M0	Negative	N0	315	0	LumA	Luminal A	Positive	LumA	-12	-3	enrollment	T_Other	T2	LIVING	TCGA-E2-A15G-01	Iq	C3-BRCA/Luminal	cluster 1	BRCA non-CIMP c9	BRCA nonbasal-like c8	BRCA nonbasal-like c7	miRNA cluster 12	cluster 1	mutation cluster 4	TCGA-E2-A15G	TCGA Breast Cancer (BRCA)	breast invasive carcinoma	Breast					76	Left Upper Outer Quadrant	Sentinel node biopsy alone
TCGA-E2-A15H-01	Stage IIA	38	2	Stage IIA	42		Positive	FEMALE	Positive	3	1	3	Negative	M0	Positive	N1	42	0	LumA	Luminal A	Positive	Her2	0	0	enrollment	T1	T1	LIVING	TCGA-E2-A15H-01	BRCA-LUAD+	C3-BRCA/Luminal	cluster 2	BRCA non-CIMP c9	BRCA basal-like c6	BRCA nonbasal-like c7	miRNA cluster 4	cluster 4	mutation c1uster 9	TCGA-E2-A15H	TCGA Breast Cancer (BRCA)	breast invasive carcinoma	Breast					38	Right Upper Outer Quadrant	Sentinel node biopsy alone
TCGA-E2-A15I-01	Stage IIA	44	2	Stage IIA	411		Positive	FEMALE	Negative				Negative	M0	Negative	N0	411	0	LumA	Luminal A	Positive		-5	-7	enrollment	T_Other	T2	LIVING	TCGA-E2-A15I-01	Kirc+	C3-BRCA/Luminal	cluster 2	BRCA non-CIMP c9	BRCA nonbasal-like c8	BRCA nonbasal-like c7	miRNA c1uster 10	cluster 7	mutation cluster 4	TCGA-E2-A15I	TCGA Breast Cancer (BRCA)	breast invasive carcinoma	Breast					44	Left Upper Outer Quadrant|Left Lower Outer Quadrant	Sentinel node biopsy alone
TCGA-E2-A15I-11		44			411			FEMALE									411	0	Normal						enrollment			LIVING	TCGA-E2-A15I-11		C3-BRCA/Luminal							mutation cluster 4	TCGA-E2-A15I	TCGA Breast Cancer (BRCA)	breast invasive carcinoma	Breast					44	Left Upper Outer Quadrant|Left Lower Outer Quadrant	Sentinel node biopsy alone
TCGA-E2-A15J-01	Stage I	51	2	Stage I	463		Positive	FEMALE	Negative	1	3	3	Negative	M0	Negative	N0	463	0	LumA	Luminal A	Positive	LumA/B	-12	-3	enrollment	T1	T1	LIVING	TCGA-E2-A15J-01	Iq	C3-BRCA/Luminal	cluster 4	BRCA CIMP c7	BRCA nonbasal-like c8	BRCA nonbasal-like c7	miRNA cluster 4	cluster 4	mutation c1uster 9	TCGA-E2-A15J	TCGA Breast Cancer (BRCA)	breast invasive carcinoma	Breast					51	Left Upper Outer Quadrant	Sentinel node biopsy alone
TCGA-E2-A15K-01	Stage IIA	58	2	Stage IIB	34		Positive	FEMALE	Negative	3	3	4	Negative	M0	Positive	N1	34	0	LumB	Luminal B	Positive	LumA	-12	-3	enrollment	T_Other	T2	LIVING	TCGA-E2-A15K-01	Iq	C3-BRCA/Luminal	cluster 2	BRCA non-CIMP c9	BRCA nonbasal-like c8	BRCA nonbasal-like c7	miRNA cluster 4	cluster 4	mutation cluster 4	TCGA-E2-A15K	TCGA Breast Cancer (BRCA)	breast invasive carcinoma	Breast					58	Right Upper Outer Quadrant	Axillary lymph node dissection alone
TCGA-E2-A15K-06		58			34			FEMALE									34	0	LumB						enrollment			LIVING	TCGA-E2-A15K-06		C3-BRCA/Luminal	cluster 2	BRCA non-CIMP c9		BRCA nonbasal-like c7	miRNA cluster 7	cluster 3	mutation cluster 4	TCGA-E2-A15K	TCGA Breast Cancer (BRCA)	breast invasive carcinoma	Breast					58	Right Upper Outer Quadrant	Axillary lymph node dissection alone
TCGA-E2-A15K-11		58			34			FEMALE									34	0							enrollment			LIVING	TCGA-E2-A15K-11		C3-BRCA/Luminal							mutation cluster 4	TCGA-E2-A15K	TCGA Breast Cancer (BRCA)	breast invasive carcinoma	Breast					58	Right Upper Outer Quadrant	Axillary lymph node dissection alone
TCGA-E2-A15L-01	Stage IIA	65	2	Stage IIA	331		Positive	FEMALE	Negative				Negative	M0	Negative	N0	331	0	LumA	Luminal B	Positive	ReacI	-12	-3	enrollment	T_Other	T2	LIVING	TCGA-E2-A15L-01	Kirc+	C3-BRCA/Luminal	cluster 2	BRCA non-CIMP c9	BRCA nonbasal-like c8	BRCA nonbasal-like c7			mutation cluster 4	TCGA-E2-A15L	TCGA Breast Cancer (BRCA)	breast invasive carcinoma	Breast					65	Right	Sentinel node biopsy alone
TCGA-E2-A15L-11		65			331			FEMALE									331	0							enrollment			LIVING	TCGA-E2-A15L-11		C3-BRCA/Luminal							mutation cluster 4	TCGA-E2-A15L	TCGA Breast Cancer (BRCA)	breast invasive carcinoma	Breast					65	Right	Sentinel node biopsy alone
TCGA-E2-A15M-01	Stage IIA	66	3	Stage IIA	234		Positive	FEMALE	Negative	3	4	3	Negative	M0	Negative	N0	234	0	LumA	Luminal B	Positive	ReacI	-4	-4	enrollment	T_Other	T2	LIVING	TCGA-E2-A15M-01	High	C3-BRCA/Luminal	cluster 1	BRCA non-CIMP c9	BRCA nonbasal-like c8	BRCA nonbasal-like c7	miRNA cluster 13	cluster 6	mutation cluster 5	TCGA-E2-A15M	TCGA Breast Cancer (BRCA)	breast invasive carcinoma	Breast					66	Right Lower Outer Quadrant	Sentinel node biopsy alone
TCGA-E2-A15M-11		66			234			FEMALE									234	0	Normal						enrollment			LIVING	TCGA-E2-A15M-11		C3-BRCA/Luminal							mutation cluster 5	TCGA-E2-A15M	TCGA Breast Cancer (BRCA)	breast invasive carcinoma	Breast					66	Right Lower Outer Quadrant	Sentinel node biopsy alone
TCGA-E2-A15O-01	Stage I	89	4	Stage IIA	395		Positive	FEMALE	Negative	1	3	3	Negative	M0	Negative	N0	395	0	LumA	Luminal A	Positive	LumA	0	-3	enrollment	T_Other	T2	LIVING	TCGA-E2-A15O-01	Kirc+	C3-BRCA/Luminal	cluster 4	BRCA CIMP c7	BRCA nonbasal-like c8	BRCA nonbasal-like c7	miRNA cluster 14	cluster 2	mutation c1uster 9	TCGA-E2-A15O	TCGA Breast Cancer (BRCA)	breast invasive carcinoma	Breast	YES	NO			89	Left Upper Inner Quadrant	No axillary staging
TCGA-E2-A15P-01	Stage IA	61	2	Stage I	315		Positive	FEMALE	Negative	3	4	3	Negative	M0	Negative	N0	315	0	LumA	Luminal A	Positive	ReacI	-5	-7	enrollment	T1	T1	LIVING	TCGA-E2-A15P-01	Kirc+	C3-BRCA/Luminal	cluster 2	BRCA non-CIMP c9	BRCA nonbasal-like c8	BRCA nonbasal-like c7	miRNA cluster 14	cluster 2	mutation cluster 4	TCGA-E2-A15P	TCGA Breast Cancer (BRCA)	breast invasive carcinoma	Breast					61	Right Upper Outer Quadrant	Sentinel node biopsy alone
TCGA-E2-A15R-01	Stage IIIA	64	4	Stage IIA	330		Positive	FEMALE	Negative	4	3	3	Negative	M0	Positive	N1	330	0	LumA	Luminal A	Positive	LumA/B	-10	-3	enrollment	T1	T1	LIVING	TCGA-E2-A15R-01	BRCA-LUAD+	C3-BRCA/Luminal	cluster 3	BRCA CIMP c7	BRCA nonbasal-like c8	BRCA nonbasal-like c7	miRNA cluster 12	cluster 5	mutation c1uster 9	TCGA-E2-A15R	TCGA Breast Cancer (BRCA)	breast invasive carcinoma	Breast					64	Right Upper Outer Quadrant	Sentinel node biopsy alone
TCGA-E2-A15S-01	Stage IIB	34		Stage IIB	274		Positive	FEMALE	Negative				Negative	M0	Positive	N1	274	0	LumB	Luminal B	Negative	LumA/B	-10	-3	enrollment	T_Other	T2	LIVING	TCGA-E2-A15S-01		C3-BRCA/Luminal	cluster 4	BRCA CIMP c7	BRCA nonbasal-like c8	BRCA nonbasal-like c7	miRNA cluster 2	cluster 6	mutation c1uster 9	TCGA-E2-A15S	TCGA Breast Cancer (BRCA)	breast invasive carcinoma	Breast					34	Left Upper Inner Quadrant|Left Upper Outer Quadrant	Sentinel lymph node biopsy plus axillary dissection
TCGA-E2-A15T-01	Stage IIA	65		Stage IIA	267		Positive	FEMALE	Negative				Negative	M0	Negative	N0	267	0		Luminal B	Positive	LumA/B	-10	-3	enrollment	T_Other	T2	LIVING	TCGA-E2-A15T-01			cluster 4	BRCA CIMP c7	BRCA nonbasal-like c8		miRNA cluster 14	cluster 2	mutation c1uster 9	TCGA-E2-A15T	TCGA Breast Cancer (BRCA)	breast invasive carcinoma	Breast					65	Left Upper Outer Quadrant	Sentinel node biopsy alone
TCGA-E2-A1AZ-01	Stage IIB	63	4	Stage IIB	1964		Negative	FEMALE	Negative				Negative	M0	Positive	N1	1964	0	Basal	Basal-like	Negative	Basal	-13	-12	enrollment	T_Other	T2	LIVING	TCGA-E2-A1AZ-01	High	C4-BRCA/Basal	cluster 5	BRCA basal-like c8	BRCA basal-like c6	BRCA basal-like c8			mutation c1uster 9	TCGA-E2-A1AZ	TCGA Breast Cancer (BRCA)	breast invasive carcinoma	Breast					63	Left Upper Inner Quadrant	Sentinel node biopsy alone
TCGA-E2-A1B0-01	Stage IIIA	50	3	Stage IIIA	1271		Negative	FEMALE	Positive	1	2	2	Negative	M0	Positive	N2	1271	0	Her2	HER2-enriched	Negative	ReacI	-13	-10	enrollment	T_Other	T2	LIVING	TCGA-E2-A1B0-01	High	C3-BRCA/Luminal	cluster 5	Cluster 5	KIRC-like c1	BRCA nonbasal-like c7	miRNA cluster 4	cluster 4	mutation cluster 5	TCGA-E2-A1B0	TCGA Breast Cancer (BRCA)	breast invasive carcinoma	Breast					50	Left Upper Outer Quadrant	Sentinel lymph node biopsy plus axillary dissection
TCGA-E2-A1B1-01	Stage IIB	45	3	Stage IIB	1361		Positive	FEMALE	Positive	1	2	3	Negative	M0	Positive	N1	1361	0	LumA	Luminal A	Positive	ReacI	-5	-7	enrollment	T_Other	T2	LIVING	TCGA-E2-A1B1-01	Kirc+	C5-KIRC	cluster 5	Low purity c2	KIRC-like c1	BRCA nonbasal-like c7	miRNA cluster 4	cluster 4	mutation c1uster 9	TCGA-E2-A1B1	TCGA Breast Cancer (BRCA)	breast invasive carcinoma	Breast					45	Left Upper Outer Quadrant	Sentinel node biopsy alone
TCGA-E2-A1B4-01	Stage IIIA	74	2	Stage IIIA	911		Positive	FEMALE	Negative	3	3	3	Negative	M0	Positive	N2	911	0	LumA	Luminal A	Positive	LumA/B	-12	-3	enrollment	T1	T1	LIVING	TCGA-E2-A1B4-01	Kirc+	C3-BRCA/Luminal	cluster 2	BRCA non-CIMP c9	BRCA nonbasal-like c8	BRCA nonbasal-like c7	miRNA cluster 3	cluster 6	mutation cluster 4	TCGA-E2-A1B4	TCGA Breast Cancer (BRCA)	breast invasive carcinoma	Breast					74	Left Upper Inner Quadrant	Sentinel node biopsy alone
TCGA-E2-A1B5-01	Stage IIA	46	3	Stage IIA	774		Positive	FEMALE	Negative	3	4	3	Negative	M0	Negative	N0	774	0	LumA	Basal-like	Positive	ReacI	-13	-12	enrollment	T_Other	T2	LIVING	TCGA-E2-A1B5-01	BRCA-LUAD+	C3-BRCA/Luminal	cluster 1	BRCA non-CIMP c9	KIRC-like c1	BRCA nonbasal-like c7	miRNA cluster 13	cluster 6	mutation c1uster 9	TCGA-E2-A1B5	TCGA Breast Cancer (BRCA)	breast invasive carcinoma	Breast					46	Left	Sentinel node biopsy alone
TCGA-E2-A1B5-11		46			774			FEMALE									774	0							enrollment			LIVING	TCGA-E2-A1B5-11		C3-BRCA/Luminal							mutation c1uster 9	TCGA-E2-A1B5	TCGA Breast Cancer (BRCA)	breast invasive carcinoma	Breast					46	Left	Sentinel node biopsy alone
TCGA-E2-A1B6-01	Stage IIA	44	1	Stage IIA	338		Negative	FEMALE	Negative	2	2	2	Negative	M0	Negative	N0	338	0		Luminal A	Negative	Basal	-5	-7	enrollment	T_Other	T2	LIVING	TCGA-E2-A1B6-01	Quiet	C13-AML	cluster 5	Low purity c2	BRCA basal-like c6		miRNA cluster 15	cluster 6	mutation cluster 5	TCGA-E2-A1B6	TCGA Breast Cancer (BRCA)	breast invasive carcinoma	Breast					44	Left	Sentinel node biopsy alone
TCGA-E2-A1BC-01	Stage IA	63	2	Stage I	297		Positive	FEMALE	Negative	3	4	3	Negative	M0	Negative	N0	297	0	LumA	Luminal A	Positive	ReacI	-5	-7	enrollment	T1	T1	LIVING	TCGA-E2-A1BC-01	Kirc+	C3-BRCA/Luminal	cluster 2	BRCA non-CIMP c9	BRCA nonbasal-like c8	BRCA nonbasal-like c7	miRNA cluster 4	cluster 6	mutation cluster 4	TCGA-E2-A1BC	TCGA Breast Cancer (BRCA)	breast invasive carcinoma	Breast					63	Right	Sentinel node biopsy alone
TCGA-E2-A1BC-11		63			297			FEMALE									297	0							enrollment			LIVING	TCGA-E2-A1BC-11		C3-BRCA/Luminal							mutation cluster 4	TCGA-E2-A1BC	TCGA Breast Cancer (BRCA)	breast invasive carcinoma	Breast					63	Right	Sentinel node biopsy alone
TCGA-E2-A1BD-01	Stage IIA	53	2	Stage IIA	317		Positive	FEMALE	Negative	3	3	3	Negative	M0	Negative	N0	317	0	LumA	Luminal A	Positive	LumA	-7	-3	enrollment	T_Other	T2	LIVING	TCGA-E2-A1BD-01	BRCA-LUAD+	C3-BRCA/Luminal	cluster 4	BRCA CIMP c7	BRCA nonbasal-like c8	BRCA nonbasal-like c7	miRNA cluster 4	cluster 6	mutation cluster 4	TCGA-E2-A1BD	TCGA Breast Cancer (BRCA)	breast invasive carcinoma	Breast					53	Right Upper Outer Quadrant	Sentinel node biopsy alone
TCGA-E2-A1IE-01	Stage IIB	61	5	Stage IIB	983		Positive	FEMALE	Negative				Negative	M0	Positive	N1	983	0	LumA		Positive				enrollment	T_Other	T2	LIVING	TCGA-E2-A1IE-01	Squamous	C3-BRCA/Luminal	cluster 3	BRCA CIMP c7		BRCA nonbasal-like c7	miRNA cluster 12	cluster 6	mutation c1uster 9	TCGA-E2-A1IE	TCGA Breast Cancer (BRCA)	breast invasive carcinoma	Breast	YES	NO			61	Right	Sentinel node biopsy alone
TCGA-E2-A1IF-01	Stage I	74	2	Stage I	956		Positive	FEMALE	Negative				Negative	M0	Negative	N0	956	0	LumA		Positive				enrollment	T1	T1	LIVING	TCGA-E2-A1IF-01	Iq	C3-BRCA/Luminal	cluster 5	BRCA non-CIMP c9		BRCA nonbasal-like c7	miRNA c1uster 9	cluster 6	mutation cluster 1	TCGA-E2-A1IF	TCGA Breast Cancer (BRCA)	breast invasive carcinoma	Breast					74	Left Upper Outer Quadrant	Sentinel node biopsy alone
TCGA-E2-A1IF-11		74			956			FEMALE									956	0							enrollment			LIVING	TCGA-E2-A1IF-11		C3-BRCA/Luminal							mutation cluster 1	TCGA-E2-A1IF	TCGA Breast Cancer (BRCA)	breast invasive carcinoma	Breast					74	Left Upper Outer Quadrant	Sentinel node biopsy alone
TCGA-E2-A1IG-01	Stage IIB	45	5	Stage IIB	755		Positive	FEMALE					Negative	M0	Positive	N1	755	0	LumA		Positive				enrollment	T_Other	T2	LIVING	TCGA-E2-A1IG-01	BRCA-LUAD+	C3-BRCA/Luminal	cluster 4	BRCA CIMP c7	BRCA nonbasal-like c8	BRCA nonbasal-like c7	miRNA cluster 12	cluster 4	mutation c1uster 9	TCGA-E2-A1IG	TCGA Breast Cancer (BRCA)	breast invasive carcinoma	Breast					45	Right Upper Inner Quadrant	Sentinel node biopsy alone
TCGA-E2-A1IG-11		45			755			FEMALE									755	0	Normal						enrollment			LIVING	TCGA-E2-A1IG-11		C3-BRCA/Luminal							mutation c1uster 9	TCGA-E2-A1IG	TCGA Breast Cancer (BRCA)	breast invasive carcinoma	Breast					45	Right Upper Inner Quadrant	Sentinel node biopsy alone
TCGA-E2-A1IH-01	Stage I	80	2	Stage I	658		Positive	FEMALE	Negative				Negative	M0	Negative	N0	658	0	LumA		Positive				enrollment	T1	T1	LIVING	TCGA-E2-A1IH-01	BRCA-LUAD+	C3-BRCA/Luminal	cluster 2	BRCA non-CIMP c9		BRCA nonbasal-like c7	miRNA cluster 4	cluster 6	mutation c1uster 10	TCGA-E2-A1IH	TCGA Breast Cancer (BRCA)	breast invasive carcinoma	Breast					80	Right Upper Inner Quadrant	Sentinel node biopsy alone
TCGA-E2-A1II-01	Stage I	51	2	Stage I	850		Negative	FEMALE	Negative				Negative	M0	Negative	N0	850	0	Basal		Positive				enrollment	T1	T1	LIVING	TCGA-E2-A1II-01	High	C4-BRCA/Basal	cluster 5	BRCA basal-like c8		BRCA basal-like c8	miRNA cluster 12	cluster 5	mutation cluster 5	TCGA-E2-A1II	TCGA Breast Cancer (BRCA)	breast invasive carcinoma	Breast					51	Left	Sentinel node biopsy alone
TCGA-E2-A1II-11		51			850			FEMALE									850	0							enrollment			LIVING	TCGA-E2-A1II-11		C4-BRCA/Basal							mutation cluster 5	TCGA-E2-A1II	TCGA Breast Cancer (BRCA)	breast invasive carcinoma	Breast					51	Left	Sentinel node biopsy alone
TCGA-E2-A1IJ-01	Stage I	57	3	Stage I	725		Positive	FEMALE	Negative				Negative	M0	Negative	N0	725	0	LumA		Positive				enrollment	T1	T1	LIVING	TCGA-E2-A1IJ-01	Iq	C3-BRCA/Luminal	cluster 4	BRCA non-CIMP c9		BRCA nonbasal-like c7	miRNA cluster 4	cluster 4	mutation c1uster 9	TCGA-E2-A1IJ	TCGA Breast Cancer (BRCA)	breast invasive carcinoma	Breast					57	Right Upper Outer Quadrant	Sentinel node biopsy alone
TCGA-E2-A1IK-01	Stage IIA	71	1	Stage IIA	518		Positive	FEMALE	Negative				Negative	M0	Positive	N1	518	0	LumA		Positive				enrollment	T1	T1	LIVING	TCGA-E2-A1IK-01	Quiet	C5-KIRC	cluster 1	Low purity c2		BRCA nonbasal-like c7	miRNA cluster 6	cluster 7	mutation c1uster 9	TCGA-E2-A1IK	TCGA Breast Cancer (BRCA)	breast invasive carcinoma	Breast					71	Left	Sentinel node biopsy alone
TCGA-E2-A1IL-01	Stage IIA	78	2	Stage IIA	14		Positive	FEMALE	Negative				Negative	M0	Positive	N1	14	0	LumA		Positive				enrollment	T1	T1	LIVING	TCGA-E2-A1IL-01	Iq	C3-BRCA/Luminal	cluster 2	BRCA non-CIMP c9	BRCA nonbasal-like c8	BRCA nonbasal-like c7	miRNA cluster 13	cluster 6	mutation cluster 4	TCGA-E2-A1IL	TCGA Breast Cancer (BRCA)	breast invasive carcinoma	Breast					78	Left Upper Outer Quadrant	Sentinel node biopsy alone
TCGA-E2-A1IN-01	Stage I	60	4	Stage I	392		Positive	FEMALE	Negative				Negative	M0	Negative	N0	392	0	LumA		Positive				enrollment	T1	T1	LIVING	TCGA-E2-A1IN-01	BRCA-LUAD+	C3-BRCA/Luminal	cluster 2	BRCA non-CIMP c9		BRCA nonbasal-like c7	miRNA cluster 14	cluster 2	mutation cluster 3	TCGA-E2-A1IN	TCGA Breast Cancer (BRCA)	breast invasive carcinoma	Breast					60	Right	Sentinel node biopsy alone
TCGA-E2-A1IO-01	Stage I	37	1	Stage I	448		Positive	FEMALE	Negative				Negative	M0	Negative	N0	448	0	LumA		Positive				enrollment	T1	T1	LIVING	TCGA-E2-A1IO-01	High	C3-BRCA/Luminal	cluster 1	BRCA non-CIMP c9		BRCA nonbasal-like c7	miRNA cluster 4	cluster 4	mutation cluster 3	TCGA-E2-A1IO	TCGA Breast Cancer (BRCA)	breast invasive carcinoma	Breast					37	Right	Sentinel node biopsy alone
TCGA-E2-A1IO-11		37			448			FEMALE									448	0							enrollment			LIVING	TCGA-E2-A1IO-11		C3-BRCA/Luminal							mutation cluster 3	TCGA-E2-A1IO	TCGA Breast Cancer (BRCA)	breast invasive carcinoma	Breast					37	Right	Sentinel node biopsy alone
TCGA-E2-A1IP-01	Stage IIB	42		Stage IIB	427		Positive	FEMALE	Negative				Negative	M0	Positive	N1	427	0	Basal		Negative				enrollment	T_Other	T2	LIVING	TCGA-E2-A1IP-01										TCGA-E2-A1IP	TCGA Breast Cancer (BRCA)	breast invasive carcinoma	Breast
TCGA-E2-A1IU-01	Stage IA	60	2	Stage I	127		Positive	FEMALE	Negative				Negative	M0	Negative	N0	127	0	LumA		Positive				enrollment	T1	T1	LIVING	TCGA-E2-A1IU-01	Kirc+	C3-BRCA/Luminal	cluster 1	BRCA non-CIMP c9	BRCA nonbasal-like c8	BRCA nonbasal-like c7	miRNA cluster 7	cluster 2	mutation cluster 4	TCGA-E2-A1IU	TCGA Breast Cancer (BRCA)	breast invasive carcinoma	Breast					60	Right Upper Outer Quadrant	Sentinel node biopsy alone
TCGA-E2-A1L6-01	Stage IIA	44	2	Stage IIA	1312		Positive	FEMALE	Negative				Negative	M0	Positive	N1	1312	0	LumA		Positive				enrollment	T1	T1	LIVING	TCGA-E2-A1L6-01	BRCA-LUAD+	C3-BRCA/Luminal	cluster 4	BRCA non-CIMP c9	BRCA nonbasal-like c8	BRCA nonbasal-like c7	miRNA cluster 12	cluster 7	mutation cluster 4	TCGA-E2-A1L6	TCGA Breast Cancer (BRCA)	breast invasive carcinoma	Breast					44	Left Upper Outer Quadrant	Sentinel lymph node biopsy plus axillary dissection
TCGA-E2-A1L7-01	Stage IIIA	40	1	Stage IIIA	633		Negative	FEMALE	Negative				Negative	M0	Positive	N2	633	0	LumB		Negative				enrollment	T_Other	T2	LIVING	TCGA-E2-A1L7-01	Squamous	C3-BRCA/Luminal	cluster 2	BRCA CIMP c7	BRCA nonbasal-like c8	BRCA nonbasal-like c7	miRNA cluster 2	cluster 5	mutation cluster 5	TCGA-E2-A1L7	TCGA Breast Cancer (BRCA)	breast invasive carcinoma	Breast	NO	YES			40	Right Upper Outer Quadrant	Axillary lymph node dissection alone
TCGA-E2-A1L7-11		40			633			FEMALE									633	0	Normal						enrollment			LIVING	TCGA-E2-A1L7-11		C3-BRCA/Luminal							mutation cluster 5	TCGA-E2-A1L7	TCGA Breast Cancer (BRCA)	breast invasive carcinoma	Breast	NO	YES			40	Right Upper Outer Quadrant	Axillary lymph node dissection alone
TCGA-E2-A1L8-01	Stage IIA	52	2	Stage IIB	1015		Positive	FEMALE	Negative				Negative	M0	Positive	N1	1015	0	LumA		Positive				enrollment	T_Other	T2	LIVING	TCGA-E2-A1L8-01	BRCA-LUAD+	C3-BRCA/Luminal	cluster 4	BRCA non-CIMP c9	BRCA nonbasal-like c8	BRCA nonbasal-like c7	miRNA c1uster 9	cluster 6	mutation cluster 4	TCGA-E2-A1L8	TCGA Breast Cancer (BRCA)	breast invasive carcinoma	Breast					52	Left Upper Outer Quadrant	Sentinel lymph node biopsy plus axillary dissection
TCGA-E2-A1L9-01	Stage IIB	40	3	Stage IIA	388		Positive	FEMALE	Negative				Negative	M0	Positive	N1	388	0	LumA		Positive				enrollment	T1	T1	LIVING	TCGA-E2-A1L9-01	Iq	C3-BRCA/Luminal	cluster 1	BRCA non-CIMP c9		BRCA nonbasal-like c7	miRNA cluster 4	cluster 6	mutation cluster 4	TCGA-E2-A1L9	TCGA Breast Cancer (BRCA)	breast invasive carcinoma	Breast					40	Right	Sentinel node biopsy alone
TCGA-E2-A1LA-01	Stage IIA	59	5	Stage IIA	463		Positive	FEMALE	Negative				Negative	M0	Positive	N1	463	0	LumA		Positive				enrollment	T1	T1	LIVING	TCGA-E2-A1LA-01	High	C3-BRCA/Luminal	cluster 2	BRCA non-CIMP c9		BRCA nonbasal-like c7	miRNA cluster 14	cluster 2	mutation cluster 12	TCGA-E2-A1LA	TCGA Breast Cancer (BRCA)	breast invasive carcinoma	Breast					59	Right Upper Inner Quadrant	Sentinel lymph node biopsy plus axillary dissection
TCGA-E2-A1LB-01	Stage IIB	41	1	Stage IIB	972		Negative	FEMALE	Positive				Negative	M0	Positive	N1	972	0	Her2		Negative				enrollment	T_Other	T2	LIVING	TCGA-E2-A1LB-01	Kirc+	C3-BRCA/Luminal	cluster 4	BRCA CIMP c7	BRCA basal-like c6	BRCA nonbasal-like c7	miRNA cluster 7	cluster 3	mutation c1uster 9	TCGA-E2-A1LB	TCGA Breast Cancer (BRCA)	breast invasive carcinoma	Breast					41	Right Upper Outer Quadrant	Axillary lymph node dissection alone
TCGA-E2-A1LB-11		41			972			FEMALE									972	0	Normal						enrollment			LIVING	TCGA-E2-A1LB-11		C3-BRCA/Luminal							mutation c1uster 9	TCGA-E2-A1LB	TCGA Breast Cancer (BRCA)	breast invasive carcinoma	Breast					41	Right Upper Outer Quadrant	Axillary lymph node dissection alone
TCGA-E2-A1LE-01																													TCGA-E2-A1LE-01	Squamous			BRCA CIMP c7	BRCA basal-like c6		miRNA cluster 7			TCGA-E2-A1LE	TCGA Breast Cancer (BRCA)	breast invasive carcinoma	Breast	YES	NO	NO		71	Right Upper Inner Quadrant|Right Lower Inner Quadrant	Sentinel lymph node biopsy plus axillary dissection
TCGA-E2-A1LG-01	Stage IIA	50	2	Stage IIA	350		Negative	FEMALE	Negative				Negative	M0	Negative	N0	350	0	Basal		Negative				enrollment	T_Other	T2	LIVING	TCGA-E2-A1LG-01	Squamous	C4-BRCA/Basal	cluster 5	Low purity c2	KIRC-like c1	BRCA basal-like c8	miRNA cluster 11	cluster 5	mutation cluster 5	TCGA-E2-A1LG	TCGA Breast Cancer (BRCA)	breast invasive carcinoma	Breast					50	Left Upper Outer Quadrant	Axillary lymph node dissection alone
TCGA-E2-A1LH-01	Stage I	59	3	Stage I	2875		Negative	FEMALE	Negative				Negative	M0	Negative	N0	2875	0	Basal		Negative				enrollment	T1	T1	LIVING	TCGA-E2-A1LH-01	High	C4-BRCA/Basal	cluster 5	Low purity c2		BRCA basal-like c8			mutation cluster 2	TCGA-E2-A1LH	TCGA Breast Cancer (BRCA)	breast invasive carcinoma	Breast					59	Right	Sentinel node biopsy alone
TCGA-E2-A1LH-11		59			2875			FEMALE									2875	0	Normal						enrollment			LIVING	TCGA-E2-A1LH-11		C4-BRCA/Basal							mutation cluster 2	TCGA-E2-A1LH	TCGA Breast Cancer (BRCA)	breast invasive carcinoma	Breast					59	Right	Sentinel node biopsy alone
TCGA-E2-A1LI-01	Stage IIB	57	3	Stage IIB	2750		Negative	FEMALE	Negative				Negative	M0	Positive	N1	2750	0	Basal		Negative				enrollment	T_Other	T2	LIVING	TCGA-E2-A1LI-01	High	C4-BRCA/Basal	cluster 4	BRCA basal-like c8		BRCA basal-like c8	miRNA cluster 7		mutation c1uster 9	TCGA-E2-A1LI	TCGA Breast Cancer (BRCA)	breast invasive carcinoma	Breast					57	Left Upper Outer Quadrant	Sentinel node biopsy alone
TCGA-E2-A1LI-11		57			2750			FEMALE									2750	0							enrollment			LIVING	TCGA-E2-A1LI-11		C4-BRCA/Basal							mutation c1uster 9	TCGA-E2-A1LI	TCGA Breast Cancer (BRCA)	breast invasive carcinoma	Breast					57	Left Upper Outer Quadrant	Sentinel node biopsy alone
TCGA-E2-A1LK-01	Stage IIIC	84	4	Stage IIIA		266	Negative	FEMALE	Negative				Negative	M0	Positive	N1	266	1	Basal		Negative				enrollment	T_Other	T3	DECEASED	TCGA-E2-A1LK-01	Squamous	C4-BRCA/Basal	cluster 3	BRCA basal-like c8	BRCA basal-like c6	BRCA basal-like c8	miRNA cluster 11	cluster 5	mutation cluster 5	TCGA-E2-A1LK	TCGA Breast Cancer (BRCA)	breast invasive carcinoma	Breast	NO	NO	YES		84	Left Upper Outer Quadrant|Left Lower Outer Quadrant	Axillary lymph node dissection alone
TCGA-E2-A1LL-01	Stage IIIA	73	1	Stage IIIA	1014		Negative	FEMALE	Negative				Negative	M0	Positive	N2	1014	0	Basal		Negative				enrollment	T_Other	T3	LIVING	TCGA-E2-A1LL-01	Squamous	C2-Squamous-like	cluster 1	BRCA CIMP c7	KIRC-like c1	squamous-like c4	miRNA cluster 4	cluster 4	mutation cluster 4	TCGA-E2-A1LL	TCGA Breast Cancer (BRCA)	breast invasive carcinoma	Breast	NO	NO	NO		73	Left Upper Outer Quadrant	Axillary lymph node dissection alone
TCGA-E2-A1LS-01	Stage IA	46		Stage I	239		Negative	FEMALE	Negative				Negative	M0	Negative	N0	239	0	Basal		Negative				enrollment	T1	T1	LIVING	TCGA-E2-A1LS-01		C4-BRCA/Basal	cluster 3	BRCA basal-like c8	BRCA basal-like c6	BRCA basal-like c8	miRNA cluster 14		mutation cluster 5	TCGA-E2-A1LS	TCGA Breast Cancer (BRCA)	breast invasive carcinoma	Breast					46	Right Lower Outer Quadrant	Sentinel node biopsy alone
TCGA-E2-A1LS-11		46			239			FEMALE									239	0	Normal						enrollment			LIVING	TCGA-E2-A1LS-11		C4-BRCA/Basal							mutation cluster 5	TCGA-E2-A1LS	TCGA Breast Cancer (BRCA)	breast invasive carcinoma	Breast					46	Right Lower Outer Quadrant	Sentinel node biopsy alone
TCGA-E2-A2P5-01																													TCGA-E2-A2P5-01	High			BRCA CIMP c7	BRCA nonbasal-like c8		miRNA cluster 5			TCGA-E2-A2P5	TCGA Breast Cancer (BRCA)	breast invasive carcinoma	Breast	YES	NO			78	Left	Axillary lymph node dissection alone
TCGA-E2-A2P6-01																													TCGA-E2-A2P6-01	Iq			BRCA CIMP c7			miRNA cluster 14			TCGA-E2-A2P6	TCGA Breast Cancer (BRCA)	breast invasive carcinoma	Breast					77	Left Upper Outer Quadrant	Sentinel node biopsy alone
TCGA-E2-A3DX-01																			LumA										TCGA-E2-A3DX-01	Quiet	C3-BRCA/Luminal		BRCA non-CIMP c9	BRCA basal-like c6	BRCA nonbasal-like c7	miRNA cluster 4			TCGA-E2-A3DX	TCGA Breast Cancer (BRCA)	breast invasive carcinoma	Breast					43	Right	Axillary lymph node dissection alone
TCGA-E2-A56Z-01																													TCGA-E2-A56Z-01										TCGA-E2-A56Z	TCGA Breast Cancer (BRCA)	breast invasive carcinoma	Breast					69	Right	Sentinel lymph node biopsy plus axillary dissection
TCGA-E2-A570-01																													TCGA-E2-A570-01										TCGA-E2-A570	TCGA Breast Cancer (BRCA)	breast invasive carcinoma	Breast					47	Right Lower Inner Quadrant	Sentinel node biopsy alone
TCGA-E2-A572-01																													TCGA-E2-A572-01										TCGA-E2-A572	TCGA Breast Cancer (BRCA)	breast invasive carcinoma	Breast					72	Left	Axillary lymph node dissection alone
TCGA-E2-A573-01																													TCGA-E2-A573-01										TCGA-E2-A573	TCGA Breast Cancer (BRCA)	breast invasive carcinoma	Breast					48	Right Upper Outer Quadrant	Sentinel node biopsy alone
TCGA-E2-A574-01																													TCGA-E2-A574-01										TCGA-E2-A574	TCGA Breast Cancer (BRCA)	breast invasive carcinoma	Breast					44	Left	Sentinel node biopsy alone
TCGA-E2-A576-01																													TCGA-E2-A576-01										TCGA-E2-A576	TCGA Breast Cancer (BRCA)	breast invasive carcinoma	Breast					69	Left Upper Outer Quadrant	Sentinel node biopsy alone
TCGA-E2-A9RU-01																													TCGA-E2-A9RU-01										TCGA-E2-A9RU	TCGA Breast Cancer (BRCA)	breast invasive carcinoma	Breast					90	Right Lower Outer Quadrant	Axillary lymph node dissection alone
TCGA-E9-A1N3-01	Stage IIIA	70	1	Stage IIIA	0			FEMALE	Negative				Negative	M0	Positive	N2	0	0	LumA						enrollment	T1	T1	LIVING	TCGA-E9-A1N3-01	Kirc+	C3-BRCA/Luminal	cluster 4	BRCA non-CIMP c9	BRCA nonbasal-like c8	BRCA nonbasal-like c7	miRNA cluster 7		mutation c1uster 9	TCGA-E9-A1N3	TCGA Breast Cancer (BRCA)	breast invasive carcinoma	Breast					70	Right Upper Inner Quadrant	Axillary lymph node dissection alone
TCGA-E9-A1N4-01	Stage IIIA	41	2	Stage IIIA	0		Positive	FEMALE	Negative				Negative	M0	Positive	N2	0	0	LumA		Positive				enrollment	T_Other	T2	LIVING	TCGA-E9-A1N4-01	Kirc+	C3-BRCA/Luminal	cluster 2	BRCA non-CIMP c9	BRCA nonbasal-like c8	BRCA nonbasal-like c7	miRNA c1uster 10	cluster 7	mutation c1uster 9	TCGA-E9-A1N4	TCGA Breast Cancer (BRCA)	breast invasive carcinoma	Breast					41	Left Upper Inner Quadrant	Axillary lymph node dissection alone
TCGA-E9-A1N4-11		41			0			FEMALE									0	0	Normal						enrollment			LIVING	TCGA-E9-A1N4-11		C3-BRCA/Luminal							mutation c1uster 9	TCGA-E9-A1N4	TCGA Breast Cancer (BRCA)	breast invasive carcinoma	Breast					41	Left Upper Inner Quadrant	Axillary lymph node dissection alone
TCGA-E9-A1N5-01	Stage IIB	45	5	Stage IIB	0		Positive	FEMALE	Negative				Negative	M0	Positive	N1	0	0	LumA		Positive				enrollment	T_Other	T2	LIVING	TCGA-E9-A1N5-01	Kirc+	C3-BRCA/Luminal	cluster 4	BRCA non-CIMP c9	BRCA nonbasal-like c8	BRCA nonbasal-like c7	miRNA cluster 14	cluster 2	mutation cluster 3	TCGA-E9-A1N5	TCGA Breast Cancer (BRCA)	breast invasive carcinoma	Breast					45	Left Upper Outer Quadrant	Axillary lymph node dissection alone
TCGA-E9-A1N5-11		45			0			FEMALE									0	0	Normal						enrollment			LIVING	TCGA-E9-A1N5-11		C3-BRCA/Luminal							mutation cluster 3	TCGA-E9-A1N5	TCGA Breast Cancer (BRCA)	breast invasive carcinoma	Breast					45	Left Upper Outer Quadrant	Axillary lymph node dissection alone
TCGA-E9-A1N6-01	Stage IIB	52	5	Stage IIB	0		Positive	FEMALE	Positive				Negative	M0	Positive	N1	0	0	LumB		Positive				enrollment	T_Other	T2	LIVING	TCGA-E9-A1N6-01	BRCA-LUAD+	C3-BRCA/Luminal	cluster 4	BRCA CIMP c7	BRCA nonbasal-like c8	BRCA nonbasal-like c7	miRNA c1uster 9	cluster 4		TCGA-E9-A1N6	TCGA Breast Cancer (BRCA)	breast invasive carcinoma	Breast	YES	NO			52	Left Upper Outer Quadrant	Axillary lymph node dissection alone
TCGA-E9-A1N6-11		52			0			FEMALE									0	0	Normal						enrollment			LIVING	TCGA-E9-A1N6-11		C3-BRCA/Luminal								TCGA-E9-A1N6	TCGA Breast Cancer (BRCA)	breast invasive carcinoma	Breast	YES	NO			52	Left Upper Outer Quadrant	Axillary lymph node dissection alone
TCGA-E9-A1N8-01	Stage IIA	48	1	Stage IIA	0		Negative	FEMALE	Negative				Negative	M0	Negative	N0	0	0	Basal						enrollment	T_Other	T2	LIVING	TCGA-E9-A1N8-01	Squamous	C4-BRCA/Basal	cluster 5	BRCA basal-like c8	BRCA basal-like c6	BRCA basal-like c8	miRNA cluster 12	cluster 5	mutation cluster 5	TCGA-E9-A1N8	TCGA Breast Cancer (BRCA)	breast invasive carcinoma	Breast					48	Right Upper Outer Quadrant	Axillary lymph node dissection alone
TCGA-E9-A1N8-11		48			0			FEMALE									0	0							enrollment			LIVING	TCGA-E9-A1N8-11		C4-BRCA/Basal							mutation cluster 5	TCGA-E9-A1N8	TCGA Breast Cancer (BRCA)	breast invasive carcinoma	Breast					48	Right Upper Outer Quadrant	Axillary lymph node dissection alone
TCGA-E9-A1N9-01	Stage IIA	58	4	Stage IIA	0		Negative	FEMALE	Negative				Negative	M0	Negative	N0	0	0	Basal		Positive				enrollment	T_Other	T2	LIVING	TCGA-E9-A1N9-01	High	C3-BRCA/Luminal	cluster 1	BRCA CIMP c7	BRCA nonbasal-like c8	BRCA nonbasal-like c7	miRNA cluster 12	cluster 5	mutation cluster 5	TCGA-E9-A1N9	TCGA Breast Cancer (BRCA)	breast invasive carcinoma	Breast					58	Right Lower Outer Quadrant	Axillary lymph node dissection alone
TCGA-E9-A1N9-11		58			0			FEMALE									0	0	Normal						enrollment			LIVING	TCGA-E9-A1N9-11		C3-BRCA/Luminal							mutation cluster 5	TCGA-E9-A1N9	TCGA Breast Cancer (BRCA)	breast invasive carcinoma	Breast					58	Right Lower Outer Quadrant	Axillary lymph node dissection alone
TCGA-E9-A1NA-01	Stage IIA	58	5	Stage IIA	0		Positive	FEMALE	Negative				Negative	M0	Negative	N0	0	0	LumB		Positive				enrollment	T_Other	T2	LIVING	TCGA-E9-A1NA-01	BRCA-LUAD+	C3-BRCA/Luminal	cluster 3	BRCA CIMP c7	BRCA nonbasal-like c8	BRCA nonbasal-like c7	miRNA cluster 4	cluster 4	mutation c1uster 9	TCGA-E9-A1NA	TCGA Breast Cancer (BRCA)	breast invasive carcinoma	Breast					58	Left Lower Outer Quadrant	Axillary lymph node dissection alone
TCGA-E9-A1NA-11		58			0			FEMALE									0	0	Normal						enrollment			LIVING	TCGA-E9-A1NA-11		C3-BRCA/Luminal							mutation c1uster 9	TCGA-E9-A1NA	TCGA Breast Cancer (BRCA)	breast invasive carcinoma	Breast					58	Left Lower Outer Quadrant	Axillary lymph node dissection alone
TCGA-E9-A1NC-01	Stage IIB	61	1	Stage IIB	0		Negative	FEMALE	Negative				Negative	M0	Positive	N1	0	0			Positive				enrollment	T_Other	T2	LIVING	TCGA-E9-A1NC-01	Squamous		cluster 5	Low purity c2			miRNA cluster 13		mutation c1uster 9	TCGA-E9-A1NC	TCGA Breast Cancer (BRCA)	breast invasive carcinoma	Breast					61	Right Upper Inner Quadrant	Axillary lymph node dissection alone
TCGA-E9-A1ND-01	Stage IIB	75	1	Stage IIB	0		Negative	FEMALE	Negative				Negative	M0	Positive	N1	0	0	Basal		Negative				enrollment	T_Other	T2	LIVING	TCGA-E9-A1ND-01	Squamous	C4-BRCA/Basal	cluster 5	Cluster 5	BRCA basal-like c6	BRCA basal-like c8	miRNA cluster 11	cluster 5	mutation cluster 2	TCGA-E9-A1ND	TCGA Breast Cancer (BRCA)	breast invasive carcinoma	Breast					75	Left Upper Outer Quadrant	Axillary lymph node dissection alone
TCGA-E9-A1ND-11		75			0			FEMALE									0	0	Normal						enrollment			LIVING	TCGA-E9-A1ND-11		C4-BRCA/Basal							mutation cluster 2	TCGA-E9-A1ND	TCGA Breast Cancer (BRCA)	breast invasive carcinoma	Breast					75	Left Upper Outer Quadrant	Axillary lymph node dissection alone
TCGA-E9-A1NE-01	Stage IIB	28	1	Stage IIB	0		Positive	FEMALE	Negative				Negative	M0	Positive	N1	0	0	LumA		Positive				enrollment	T_Other	T2	LIVING	TCGA-E9-A1NE-01	Kirc+	C3-BRCA/Luminal	cluster 4	BRCA non-CIMP c9	BRCA nonbasal-like c8	BRCA nonbasal-like c7	miRNA cluster 13	cluster 6	mutation c1uster 9	TCGA-E9-A1NE	TCGA Breast Cancer (BRCA)	breast invasive carcinoma	Breast					28	Right Lower Outer Quadrant	Axillary lymph node dissection alone
TCGA-E9-A1NE-11		28			0			FEMALE									0	0							enrollment			LIVING	TCGA-E9-A1NE-11		C3-BRCA/Luminal							mutation c1uster 9	TCGA-E9-A1NE	TCGA Breast Cancer (BRCA)	breast invasive carcinoma	Breast					28	Right Lower Outer Quadrant	Axillary lymph node dissection alone
TCGA-E9-A1NF-01	Stage IIA	60	5	Stage IIA	0		Positive	FEMALE	Negative				Negative	M0	Negative	N0	0	0	LumB		Positive				enrollment	T_Other	T2	LIVING	TCGA-E9-A1NF-01	Squamous	C3-BRCA/Luminal	cluster 4	BRCA CIMP c7	BRCA nonbasal-like c8	BRCA nonbasal-like c7	miRNA cluster 4	cluster 4	mutation cluster 13	TCGA-E9-A1NF	TCGA Breast Cancer (BRCA)	breast invasive carcinoma	Breast	YES		NO		60	Right Upper Outer Quadrant	Axillary lymph node dissection alone
[truncated: 211 more rows]
[truncated: 144 more columns]
