# Supplementary material for: Identification of Potential Prognostic Biomarkers for Breast Cancer Based on lncRNA-TF-Associated ceRNA Network and Functional Module
Source: Biomed Res Int. 2020 Jul 28;2020:5257896. doi: 10.1155/2020/5257896 (PMC7411464; doi:10.1155/2020/5257896)
Supplement: Supplementary 8 — Supplementary Table S8: topology feature of genes of the lncRNA-TF-associated ceRNA network. [file 5257896.f8.xlsx]

## Sheet: Sheet1
Gene	Shortest path length	Degree	Betweenness	Closeness	Node type (1:lncRNAs, 2:TFs)
MDM4	2.48259	55	0.172764	0.402806	2
MATR3	2.51741	50	0.160691	0.397233	2
ZNF410	2.61692	44	0.137189	0.382129	2
HMBOX1	2.61692	41	0.0994502	0.382129	2
ZBTB20	2.59701	39	0.151903	0.385057	2
SHPRH	2.83085	29	0.0888727	0.353251	2
ZNF26	2.84577	25	0.0591034	0.351399	2
DMTF1	2.83582	22	0.044555	0.352632	2
BAZ2B	2.83582	22	0.0226784	0.352632	2
NFAT5	2.81592	21	0.0432716	0.355124	2
ZNF91	2.95522	21	0.0183187	0.338384	2
RORA	3.12438	20	0.012089	0.320064	2
AC084219	2.54726	20	0.0544096	0.392578	1
ZNF236	2.95025	16	0.0194702	0.338954	2
CTB-89H12	2.55224	16	0.0338647	0.391813	1
MALAT1	2.57214	16	0.0285253	0.388781	1
ZNF124	3.20398	15	0.0195336	0.312112	2
HCG18	2.56219	15	0.034441	0.390291	1
RP3-368A4	2.74627	15	0.0278876	0.36413	1
RP11-206L10	2.60199	14	0.0368445	0.384321	1
AC000120	2.73134	14	0.0310356	0.36612	1
RP11-342K6	2.59204	13	0.0805688	0.385797	1
KCNQ1OT1	2.63184	13	0.0216361	0.379962	1
RP11-540O11	2.75124	13	0.0179966	0.363472	1
XIST	2.65672	13	0.0913999	0.376404	1
RP11-73M18	2.80597	11	0.0150912	0.356383	1
AC003104	2.74129	11	0.0126241	0.364791	1
ZNF451	3.02488	10	0.00907524	0.330592	2
RUNX1T1	3	10	0.166342	0.333333	2
ZNF519	3.36816	10	0.013872	0.296898	2
ZBTB37	3.20398	10	0.0031989	0.312112	2
AC007038	2.8209	10	0.0393221	0.354497	1
AC005154	2.71144	10	0.0167957	0.368807	1
RP11-151N17	3.14925	10	0.00608345	0.317536	1
CTD-2270L9	2.83085	10	0.0074515	0.353251	1
PIAS2	3.12438	9	0.0043688	0.320064	2
ZNF573	3.34826	9	0.00417381	0.298663	2
RP5-1085F17	2.91045	9	0.00772126	0.34359	1
RP11-258C19	2.89552	9	0.0174039	0.345361	1
ZNF564	3.06468	8	0.00575505	0.326299	2
ZNF493	3.27363	8	0.00240258	0.305471	2
HMGA2	4.21891	8	0.034057	0.237028	2
YAF2	3.1791	8	0.0131483	0.314554	2
ZNF483	3.41791	8	0.00161837	0.292576	2
RP11-148B6	2.87065	8	0.007133	0.348354	1
RP11-549J18	2.8408	8	0.00632024	0.352014	1
RP11-284N8	6.68159	7	0.0588557	0.149665	1
RBM15	3.22886	7	0.0126734	0.309707	2
PURA	3.38308	7	0.00176642	0.295588	2
RP1-20N2	3.23881	7	0.0019551	0.308756	1
RP11-282K24	2.79104	7	0.035809	0.358289	1
RP11-290D2	2.89055	7	0.00519425	0.345955	1
ZNF586	3.33333	6	0.00094759	0.3	2
RP11-175K6	2.28571	6	0.527473	0.4375	1
ZNF571	3.47264	6	0.00230709	0.287966	2
ZNF141	3.1592	6	0.00194612	0.316535	2
RP11-115C21	2.9005	6	0.00487649	0.344768	1
RP11-37B2	3.10945	6	0.00527895	0.3216	1
NEAT1	2.79104	6	0.00680041	0.358289	1
RP11-18F14	3.04478	6	0.0032147	0.328431	1
RP1-59D14	3.32338	6	0.00298323	0.300898	1
RP1-5O6	2.9005	6	0.00427366	0.344768	1
RP11-761E20	2.82587	6	0.00704091	0.353873	1
RP11-415J8	3.18408	5	0.00265905	0.314063	1
RP4-802A10	3.00995	5	0.0210447	0.332231	1
RP11-267N12	3.04975	5	0.00344156	0.327896	1
AC009299	3.25373	5	0.00181929	0.307339	1
RP11-43D2	2.93035	5	0.00287832	0.341256	1
RP1-102H19	3.32836	5	0.00165555	0.300448	1
KB-431C1	3.199	5	0.00435567	0.312597	1
RP11-5L12	3.12935	5	0.00166899	0.319555	1
RP11-21A7A	3.02488	5	0.00436915	0.330592	1
SCARNA9	3.10945	5	0.00201725	0.3216	1
RP11-902B17	2.98507	5	0.00281588	0.335	1
RP11-64K12	3.00498	5	0.0038456	0.332781	1
RP11-10O17	3.0199	5	0.00299599	0.331137	1
CTD-2574D22	2.99005	5	0.00270735	0.334443	1
RP11-231E4	3.04975	5	0.00285953	0.327896	1
ATM	2.95522	5	0.0200224	0.338384	2
KB-318B8	3.17413	5	0.0121381	0.315047	1
RP4-714D9	3.31343	4	0.00110588	0.301802	1
RP11-181E10	3.52239	4	0.00171277	0.283898	1
RP11-65L3	3.16915	4	0.0010927	0.315542	1
MAGI1-IT1	3.1592	4	0.00099056	0.316535	1
CTD-2083E4	3.31343	4	0.00305957	0.301802	1
BRWD1	3.39303	4	0.00024361	0.294721	2
RP11-819C21	3.37313	4	0.00222304	0.29646	1
DLEU2	3.33831	4	0.00158768	0.299553	1
MEG8	3.91542	4	0.0260528	0.2554	1
RP11-1006G14	3.12438	4	0.0016289	0.320064	1
RP1-193H18	2.28571	4	0.494505	0.4375	1
CTD-2561J22	3.28358	4	0.00231994	0.304545	1
CTD-2017D11	3.59204	4	0.00196419	0.278393	1
CTC-459F4	2.89552	4	0.00427534	0.345361	1
CTD-3064H18	3.22886	4	0.00194181	0.309707	1
CTD-3138B18	3.04975	4	0.00250875	0.327896	1
ZNF382	3.57711	3	0.01029	0.279555	2
RP4-665N4	3.36318	3	0.00118924	0.297337	1
MEIS2	4.89055	3	0.0002298	0.204476	2
RP4-717I23	3.00995	3	0.0016301	0.332231	1
RP11-46A10	3.33333	3	0.00061319	0.3	1
ZNF546	3.48756	3	0.00045796	0.286733	2
PPARG	2.07143	3	0.5	0.482759	2
NR2C2	3.26866	3	0.00053253	0.305936	2
AC007036	3.36318	3	0.00118924	0.297337	1
GS1-124K5	3.26368	3	0.00242142	0.306402	1
HOXD3	3.59204	3	0.0180947	0.278393	2
AF131215	3.16418	3	0.00111936	0.316038	1
RP11-102F4	3.93532	3	0.00625185	0.254109	1
RP11-276H19	1	3	1	1	1
RP11-119K6	3.199	3	0.00180616	0.312597	1
RP11-923I11	3.34328	3	0.03728	0.299107	1
RP11-478C19	3.24876	3	0.00055683	0.30781	1
RP11-33N16	3.1393	3	0.00074515	0.318542	1
RP11-429D19	3.30348	3	0.00150215	0.302711	1
RP11-752G15	3.34328	3	0.00084203	0.299107	1
RP5-991G20	3.0597	3	0.0018203	0.326829	1
RP11-676J12	3.67164	3	0.00072655	0.272358	1
RP11-227G15	3.12935	3	0.00137229	0.319555	1
RP5-837J1	3.36318	3	0.00118924	0.297337	1
RP11-158H5	3.20398	3	0.00120375	0.312112	1
RP1-184J9	3.94527	2	0.00287335	0.253468	1
RP5-837I24	3.98507	2	0.00307478	0.250936	1
RP11-421L21	3.44279	2	0.0003371	0.290462	1
EOMES	5.74627	2	0.0675622	0.174026	2
IRF4	7.67164	2	0	0.13035	2
PRDM1	7.67164	2	0	0.13035	2
POU2AF1	7.67164	2	0	0.13035	2
POU2F2	7.67164	2	0	0.13035	2
ZNF248	3.30846	2	7.551e-05	0.302256	2
ELK4	3.80597	2	0.00995025	0.262745	2
REL	3.77612	2	0.00019587	0.264822	2
ERCC6	3.78607	2	6.131e-05	0.264126	2
RP11-566E18	1	2	1	1	1
FOXP2	4.9005	2	0.00995025	0.204061	2
EPAS1	2.5	2	0.137363	0.4	2
RP11-79N23	3.71144	2	0.00014817	0.269437	1
HOTAIRM1	1.33333	2	0.666667	0.75	1
HOXA3	1.33333	2	0.666667	0.75	2
CHD2	3.52736	2	3.69e-05	0.283498	2
AC007566	3.44279	2	0.00029318	0.290462	1
RP11-331F9	3.55224	2	0.00056345	0.281513	1
ZNF566	1	2	1	1	2
RP11-492E3	3.20896	2	0.00041638	0.311628	1
RP3-323N1	3.57214	2	0.00176173	0.279944	1
RP11-57H14	3.70149	2	0.00021324	0.270161	1
EMX2OS	3.71429	2	0.142857	0.269231	1
EBF3	2.92857	2	0.263736	0.341463	2
CTD-2516F10	3.32338	2	0.00039101	0.300898	1
AP000662	3.18905	2	0.00055929	0.313573	1
ZDHHC21	3.73134	2	0.0001169	0.268	2
RP11-730K11	3.20896	2	0.00041638	0.311628	1
RP11-29G8	3.56219	2	0.00028891	0.280726	1
RP11-701H24	3.65672	2	0.00018482	0.273469	1
CTC-524C5	3.66169	2	0.00014811	0.273098	1
AC113189	3.5	2	0.142857	0.285714	1
EDF1	2.71429	2	0.263736	0.368421	2
AATF	3.9403	2	0.00995025	0.253788	2
RP11-35G9	3.35821	2	0.00033851	0.297778	1
CTD-2622I13	3.36318	2	0.00042746	0.297337	1
ZNF81	3.21393	2	0.00045909	0.311146	2
RP4-614O4	3.41294	2	0.00038051	0.293003	1
MIR155HG	4.8209	2	0.0768159	0.20743	1
GFI1	3.90547	2	0.0859701	0.256051	2
AP001469	3.54229	2	0.00070678	0.282303	1
AP000525	4.47761	2	0.00126938	0.223333	1
CTA-217C2	3.50249	2	0.00995025	0.285511	1
RP11-174G17	3.61194	1	0	0.276859	1
HCLS1	7.67662	1	0	0.130266	2
TFEC	7.67662	1	0	0.130266	2
RP11-552M11	3.82587	1	0	0.261378	1
RUSC1-AS1	1	1	0	1	1
GABPB2	1	1	0	1	2
RP11-378J18	3.82587	1	0	0.261378	1
RP11-518L10	3.47761	1	0	0.287554	1
AC016683	3.82587	1	0	0.261378	1
AC093375	3.51244	1	0	0.284703	1
APC	1.5	1	0	0.666667	2
ZNF510	1.5	1	0	0.666667	2
AC092535	5.21393	1	0	0.191794	1
AC078852	3.61194	1	0	0.276859	1
RP11-425I13	3.59204	1	0	0.278393	1
CTD-2353F22	5.89552	1	0	0.16962	1
RP11-141O11	1	1	0	1	1
HOXD11	1	1	0	1	2
AC034220	1	1	0	1	1
ANKRA2	1	1	0	1	2
HABP4	3.21429	1	0	0.311111	2
TEAD1	3.21429	1	0	0.311111	2
EZH1	3.21429	1	0	0.311111	2
ERG	3.21429	1	0	0.311111	2
CTC-308K20	3.8408	1	0	0.260363	1
RP11-405O10	1	1	0	1	1
RREB1	1	1	0	1	2
HCG11	1	1	0	1	1
KLF11	1	1	0	1	2
RP11-457M11	3.61194	1	0	0.276859	1
HCP5	1	1	0	1	1
STAT1	1	1	0	1	2
HOXA5	2	1	0	0.5	2
HOXA-AS2	2	1	0	0.5	1
ZNF117	3.72637	1	0	0.268358	2
AC058791	4.58706	1	0	0.218004	1
GS1-251I9	3.51244	1	0	0.284703	1
RP11-383J24	3.59204	1	0	0.278393	1
RP11-382A18	4.57214	1	0	0.218716	1
RP11-509J21	4.801	1	0	0.20829	1
RP11-397D12	3.61194	1	0	0.276859	1
RP11-197P3	1.5	1	0	0.666667	1
NR3C2	1.66667	1	0	0.6	2
HOXA4	1.66667	1	0	0.6	2
ARID5B	1.66667	1	0	0.6	2
SNHG7	1	1	0	1	1
REXO4	1	1	0	1	2
RP11-229P13	4.36318	1	0	0.22919	1
RP11-119F19	3.81095	1	0	0.262402	1
KLF4	4.64286	1	0	0.215385	2
RP11-658F2	3.61194	1	0	0.276859	1
RP11-174G6	3.82587	1	0	0.261378	1
HOTAIR	1	1	0	1	1
HOXC11	1	1	0	1	2
MIR17HG	1.5	1	0	0.666667	1
AC005519	3.82587	1	0	0.261378	1
MEG3	5.21393	1	0	0.191794	1
RP11-154J22	3.47761	1	0	0.287554	1
RP11-797A18	4.17413	1	0	0.239571	1
RP11-452L6	1	1	0	1	1
ZNF747	1	1	0	1	2
RP11-264L1	3.61194	1	0	0.276859	1
FENDRR	1	1	0	1	1
FOXF1	1	1	0	1	2
ZNF524	4.42857	1	0	0.225806	2
RP11-445F12	4.93532	1	0	0.202621	1
CEBPA	3.21429	1	0	0.311111	2
CTD-2047H16	3.51244	1	0	0.284703	1
RP11-715F3	3.51244	1	0	0.284703	1
RP11-21J18	3.59204	1	0	0.278393	1
RP11-126O1	3.47761	1	0	0.287554	1
CTD-3252C9	3.51244	1	0	0.284703	1
CTB-92J24	1	1	0	1	1
ZNF254	1	1	0	1	2
CTB-102L5	3.61194	1	0	0.276859	1
ZNF283	3.54229	1	0	0.282303	2
A1BG-AS1	1	1	0	1	1
ZNF324	1	1	0	1	2
RP11-227D2	5.21393	1	0	0.191794	1
RP4-564F22	3.8408	1	0	0.260363	1
AP001172	3.83085	1	0	0.261039	1
AP000265	4.22388	1	0	0.236749	1
XXbac-B461K10	3.59204	1	0	0.278393	1
ZNF417	4.16915	1	0	0.239857	2
RNU12	4.199	1	0	0.238152	1
ZNF235	4.49751	1	0	0.222345	2
BDP1	3.89055	1	0	0.257033	2
ZNF445	3.65174	1	0	0.273842	2
